# Supplementary material for: Weakly migratory metastatic breast cancer cells activate fibroblasts via microvesicle-Tg2 to facilitate dissemination and metastasis
Source: eLife journal article supplement (doi:10.7554/elife.74433), 2022-12-06
Supplement: supp [file Source Data Figure 1.xlsx]

## Sheet: C
2019-06-18	Image Number	ROI	Image Layer	Total Flux [p/s]	Avg Radiance [p/s/cm²/sr]	Stdev Radiance	Min Radiance	Max Radiance
INV1	SCS20190618130318	ROI 1	Overlay	376900000	3409000	18780000	-542900	312800000
INV3	SCS20190618130318	ROI 2	Overlay	1468000000	13260000	56930000	-453600	754900000
	Image Number	ROI	Image Layer	Total Flux [p/s]	Avg Radiance [p/s/cm²/sr]	Stdev Radiance	Min Radiance	Max Radiance
NON4	SCS20190618125516	ROI 2	Overlay	719700000	7997000	36160000	-511800	516100000
NON2	SCS20190618125516	ROI 1	Overlay	610800000	6802000	28510000	-498600	323300000
	Image Number	ROI	Image Layer	Total Flux [p/s]	Avg Radiance [p/s/cm²/sr]	Stdev Radiance	Min Radiance	Max Radiance
INV7	SCS20190618132748	ROI 2	Overlay	5606000000	62310000	251200000	-14100000	3257000000
INV5	SCS20190618132748	ROI 1	Overlay	8189000000	91130000	323900000	-14580000	3788000000
	Image Number	ROI	Image Layer	Total Flux [p/s]	Avg Radiance [p/s/cm²/sr]	Stdev Radiance	Min Radiance	Max Radiance
NON8	SCS20190618133152	ROI 2	Overlay	289600000	3235000	15990000	-423600	226400000
NON6	SCS20190618133152	ROI 1	Overlay	983200000	10930000	47520000	-454000	568000000
2019-06-25	Image Number	ROI	Image Layer	Total Flux [p/s]	Avg Radiance [p/s/cm²/sr]	Stdev Radiance	Min Radiance	Max Radiance
INV3	SCS20190625154122	ROI 2	Overlay	541000000	6033000	20170000	-1209000	241600000
INV1	SCS20190625154122	ROI 1	Overlay	1759000000	19550000	89700000	-2074000	1192000000
	Image Number	ROI	Image Layer	Total Flux [p/s]	Avg Radiance [p/s/cm²/sr]	Stdev Radiance	Min Radiance	Max Radiance
NON4	SCS20190625154729	ROI 2	Overlay	653600000	7266000	32230000	-410100	452300000
NON2	SCS20190625154729	ROI 1	Overlay	166900000	1857000	8601000	-519800	108200000
	Image Number	ROI	Image Layer	Total Flux [p/s]	Avg Radiance [p/s/cm²/sr]	Stdev Radiance	Min Radiance	Max Radiance
INV7	SCS20190625160944	ROI 2	Overlay	4559000000	50690000	211300000	-1649000	2669000000
INV5	SCS20190625160944	ROI 1	Overlay	3475000000	38660000	137400000	-1966000	1207000000
	Image Number	ROI	Image Layer	Total Flux [p/s]	Avg Radiance [p/s/cm²/sr]	Stdev Radiance	Min Radiance	Max Radiance		week1	Normalized average radiance
NON8	SCS20190625161437	ROI 2	Overlay	149400000	1656000	6903000	-103100	72060000			2019-06-18	2019-06-25	2019-07-02	2019-07-11	2019-07-16
NON6	SCS20190625161437	ROI 1	Overlay	89030000	990600	4471000	-106000	54490000		INV1		0	0.251151	6.289	3.61841
										INV3		0	9.20056	33.3776	34.0075
2019-07-02	Image Number	ROI	Image Layer	Total Flux [p/s]	Avg Radiance [p/s/cm²/sr]	Stdev Radiance	Min Radiance	Max Radiance		INV5		0	3.15416	8.33782	5.83135
INV3	SCS20190702150158	ROI 2	Overlay	5537000000	61540000	190000000	-1328000	1686000000		INV7		0	1.48372	1.93154	0.510554
INV1	SCS20190702150158	ROI 1	Overlay	2199000000	24460000	91080000	-2228000	1070000000		NON2		0	0.43888	17.7345	25.5428
	Image Number	ROI	Image Layer	Total Flux [p/s]	Avg Radiance [p/s/cm²/sr]	Stdev Radiance	Min Radiance	Max Radiance		NON4		0	-0.64038	2.8343	11.3314
NON4	SCS20190702150658	ROI 2	Overlay	235100000	2613000	10170000	-276600	126400000		NON6		0	3.35191	9.10499	27.1143
NON2	SCS20190702150658	ROI 1	Overlay	240800000	2672000	11420000	-274200	145700000		NON8		0	3.09118	3.42512	13.5773
	Image Number	ROI	Image Layer	Total Flux [p/s]	Avg Radiance [p/s/cm²/sr]	Stdev Radiance	Min Radiance	Max Radiance
INV7	SCS20190702152813	ROI 2	Overlay	11330000000	125900000	441500000	-2021000	4434000000
INV5	SCS20190702152813	ROI 1	Overlay	14370000000	160600000	415100000	-1218000	3015000000
	Image Number	ROI	Image Layer	Total Flux [p/s]	Avg Radiance [p/s/cm²/sr]	Stdev Radiance	Min Radiance	Max Radiance
NON8	SCS20190702153330	ROI 2	Overlay	609300000	6775000	33560000	-516600	514800000
NON6	SCS20190702153330	ROI 1	Overlay	387400000	4311000	15070000	-620900	171200000
2019-07-11	Image Number	ROI	Image Layer	Total Flux [p/s]	Avg Radiance [p/s/cm²/sr]	Stdev Radiance	Min Radiance	Max Radiance
INV3	SCS20190711140308	ROI 2	Overlay	18560000000	207400000	495600000	-553400	3528000000
INV1	SCS20190711140308	ROI 1	Overlay	12820000000	142500000	437400000	-1153000	3663000000
	Image Number	ROI	Image Layer	Total Flux [p/s]	Avg Radiance [p/s/cm²/sr]	Stdev Radiance	Min Radiance	Max Radiance
NON4	SCS20190711140807	ROI 2	Overlay	2508000000	27860000	96380000	-1669000	968300000
NON2	SCS20190711140807	ROI 1	Overlay	3132000000	34790000	107800000	-1757000	1092000000
	Image Number	ROI	Image Layer	Total Flux [p/s]	Avg Radiance [p/s/cm²/sr]	Stdev Radiance	Min Radiance	Max Radiance
INV7	SCS20190711143738	ROI 2	Overlay	13380000000	148600000	444300000	-2208000	3279000000
INV5	SCS20190711143738	ROI 1	Overlay	32470000000	361000000	704100000	-1099000	4571000000
	Image Number	ROI	Image Layer	Total Flux [p/s]	Avg Radiance [p/s/cm²/sr]	Stdev Radiance	Min Radiance	Max Radiance
NON8	SCS20190711144306	ROI 2	Overlay	658400000	7328000	29890000	-504700	404500000
NON6	SCS20190711144306	ROI 1	Overlay	900600000	10010000	40630000	-445700	503300000
2019-07-16	Image Number	ROI	Image Layer	Total Flux [p/s]	Avg Radiance [p/s/cm²/sr]	Stdev Radiance	Min Radiance	Max Radiance
INV3	SCS20190716141254	ROI 2	Overlay	19010000000	211200000	434300000	-364100	2287000000
INV1	SCS20190716141254	ROI 1	Overlay	8148000000	90290000	256200000	-1695000	2057000000
	Image Number	ROI	Image Layer	Total Flux [p/s]	Avg Radiance [p/s/cm²/sr]	Stdev Radiance	Min Radiance	Max Radiance
NON4	SCS20190716141804	ROI 2	Overlay	8048000000	89600000	247200000	-1459000	1835000000
NON2	SCS20190716141804	ROI 1	Overlay	4439000000	49290000	139600000	-1537000	1061000000
	Image Number	ROI	Image Layer	Total Flux [p/s]	Avg Radiance [p/s/cm²/sr]	Stdev Radiance	Min Radiance	Max Radiance
INV7	SCS20190716143802	ROI 2	Overlay	6901000000	76570000	186000000	-1820000	1470000000
INV5	SCS20190716143802	ROI 1	Overlay	23760000000	264100000	603300000	-1319000	3440000000
	Image Number	ROI	Image Layer	Total Flux [p/s]	Avg Radiance [p/s/cm²/sr]	Stdev Radiance	Min Radiance	Max Radiance
NON8	SCS20190716144153	ROI 2	Overlay	2168000000	24140000	89550000	-1811000	1028000000
NON6	SCS20190716144153	ROI 1	Overlay	2507000000	27850000	91610000	-1728000	950700000

## Sheet: E
AFM of primary tumors - all measurements in kPa
	2018-06-27		2018-10-23		2018-10-25		2018-10-26		2018-10-26		2018-10-26		2018-10-27		2018-10-19
	M5 NON		M6 INV		M5 NON		M8 INV		M6 INV		M4 INV		M7 NON		M3 NON
Region 1	0.271254	Region 1	0.330209	Region 1	1.34787	Region 1	1.24346	Region 1	2.76218	Region 1	0.347237	Region 1	0.56375	Region 1	4.45176
	0.369126		0.160434		1.49025		1.56618		0.762978		0.342444		5.0023		4.58465
	0.459765		0.10838		1.34787		1.22447		2.05977		0.340441		1.7845		0.844648
	0.742305		0.17639		1.15803		0.996663		0.624499		0.905321		4.85042		2.29707
	0.810249		0.196722		0.826537		0.177216		1.51872		0.574837		0.490956		2.11672
	0.868283		0.112499		0.860803		2.05028		0.525573		0.302568		0.542137		4.44227
	0.898268		0.111588		1.38584		2.9805		0.85282		0.186917		0.686141		1.38584
	1.00615		0.190828		0.601548		0.413473		0.738233		0.387483		9.8812		1.25295
	1.00615		0.220889		1.39533		0.823357		0.189869		0.604044		0.203784		1.81298
	1.13904		0.113278		2.27809		0.252478		0.726244		0.437753		0.297081		1.4238
	1.16752		0.151151		1.46177		1.49025		0.414849		0.664594		0.350408		3.79681
	1.16752		0.16538		1.61364		1.32888		0.484891		0.313408		1.33838		4.21446
	1.37634		0.25413		1.06311		2.29707		1.32888		0.332022		4.50871		1.57568
	1.41431		0.210258		1.17701		0.685543		1.23396		0.204686		1.00615		1.86044
			0.177691		0.854339		1.1865		1.94587		0.204714		7.08105		2.75269
			0.150961		1.45228		0.60953		0.853941		0.185503		5.02128		2.55335
			0.132689		2.87608		0.276028		0.489371		0.413007		0.431128		1.35736
			0.177691		0.968187		1.31939		1.65161		0.19582		0.635254		2.76218
			0.182721		1.83196		0.546741		0.324627		0.206262		0.457392		2.32555
			0.160852		2.03129		0.917528		0.648343		0.268311		0.581263		2.00282
			0.117701		1.09158		0.836912		0.11921		0.150173		1.44279		1.39533
			0.147373		1.52822		0.257509		0.175441		0.374954		0.275914		2.80015
			0.226147		0.947228		0.665866		0.454791		0.160453		1.79399		2.54386
			0.267912		0.329022		0.629578		0.805076		0.0971604		0.389733		3.29373
			0.152005		1.68009		0.431878		0.907438		0.165351		0.338808		2.78116
			0.206755		0.932145		0.546779		1.40482		0.24759		0.44173		0.686871
			0.230182		0.394137		0.355941		0.154805		0.190562		1.01565		3.24627
			0.132727		0.532037		1.09158		0.465109		0.114816		0.235193		2.95202
			0.175906		1.74653		0.535996		1.00615		0.11155		2.99948		2.04079
		Region 2	0.237671		2.87608		0.790961		1.02514		0.280774		0.828122		0.927864
			0.126576		1.50923		0.570319		0.340118		0.34643		0.301552		4.02462
			0.0750439		2.30656		0.445727		0.294604		0.709823		0.559802		1.97434
			0.160045		1.45228		0.411897		0.634732		0.53591	Region 2	0.31728		1.79399
			0.165522		2.45843		0.410321		1.41431		0.296521		2.24012		1.1865
			0.0838715		1.47126		1.31939				0.123055		2.34453		1.96485
			0.135878		1.11057		0.410862			Region 2	0.647878		1.93637		2.21164
			0.154445		1.26244		0.913788				0.3455		2.50589		1.10107
			0.136533		0.687631		1.8984				0.273218		4.92636		2.39199
			0.0804544		0.700739		0.773268				0.368518		1.27193		1.56618
			0.142532		1.24346		0.64729				0.164857		0.272934		1.73704
			0.13173		0.936986		0.834681				0.155963		0.517695		2.971
			0.162741		0.637836		0.406316				0.291851		2.65777		2.45843
			0.105703		0.885511		2.09774				0.282112		0.858022		3.48357
			0.0971034		1.20549		0.938097				0.251083		11.4854		3.24627
			0.0637769		1.69907		0.537296				0.361058		10.6026		2.4964
			0.0851055		1.25295		0.342899				0.416548		4.05309		1.45228
			0.126102		1.63263		0.20555				0.369088		3.55951		1.4238
			0.116828		2.22113		0.519423				0.800054		1.12955		1.94587
			0.372989		1.93637		1.93637				0.101935		0.474117		1.08209
			0.163728		0.688675		1.91739				0.800054		1.04412		1.92688
			0.139182		1.74653		1.22447				0.369088		0.492532		1.5472
					0.749016		1.73704				0.176808		0.387844		1.4333
					1.41431		2.58183				0.49033		5.87556		0.528298
					1.15803		1.74653				0.424218				2.76218
					1.12955		2.23063				0.495702			Region 2	1.04412
					2.51539		0.707403				0.671855				0.776049
					1.7845		2.05977				0.381257				0.335334
					1.21498		0.627746				0.241771				0.884078
					2.32555		1.45228				0.596185				1.36685
					2.03129		2.22113				0.709861				0.55067
					1.68009		0.502147				0.400079				0.195279
					1.05361		1.58517				0.547946				0.438019
					1.69907		0.401921				0.447217				1.14854
					1.6706		2.52488				0.339425				0.883024
					1.35736		0.533604				0.406411				0.705988
					1.88891		0.738517				0.413093				0.912155
					1.08209		0.684432				0.528829				0.912288
					1.92688		0.652909				0.350844				1.17701
					1.45228		0.34756				0.157017				0.263764
					2.05977		0.424398				1.62314				0.665287
					1.71806		0.735119				0.517097				0.777283
					1.37634		1.22447				0.874946				1.91739
					2.7337		0.366316								0.918961
					1.29092		1.83196								1.58517
					0.890115		0.698717								1.92688
					1.34787		1.23396								1.05361
					0.765845		0.52713								2.84761
					1.23396		1.17701								1.87942
					1.9079		0.160121								1.73704
					1.26244		0.187942								1.9079
					1.00615		0.390853								1.41431
					1.80348		0.649871								1.8984
					1.71806		0.276844								1.48076
					1.34787		0.787487								2.45843
					1.36685		0.699002								1.12006
					0.827951		0.804345								4.36633
					1.08209		4.47074								0.808616
					1.70856		0.135964								0.665192
					1.7845		0.142997								1.60415
					2.22113		1.36685								0.34121
					0.789138		0.907381								1.52822
					1.27193		0.47706								1.86993
					1.13904		1.00615							Region 3	1.88891
					1.69907		1.0726								0.873902
					2.17367		0.275639								0.867125
					1.25295		0.598823								2.44894
					1.15803		1.41431								0.831302
					0.65887										1.12006
					1.196										3.92021
					0.929687										2.00282
					1.31939										5.9515
					1.37634										3.15135
					1.06311										1.49974
					1.6611										2.59132
															3.14186
															2.48691
															1.86993
															0.663597
															1.6706

## Sheet: F
Sample	Cq		Sample	Cq
NON4-GAPDH	23.45		INV5a_SMA	29.85		Δ(gene)-Δ(GAPDH) (deltaCt)						ave dCT
NON4-GAPDH	23.43		INV5a_SMA	29.71			aSMA	FAP	PDGFRa	PDGFRb	Ctrl	aSMA	FAP	PDGFRa	PDGFRb
NON4-GAPDH	23.59		INV5a_SMA	28.74		INV1	4.18	5.49667	6.02333	9.81333	INV	5.43583	6.6825	6.37917	9.16167
NON2-GAPDH	26		INV5a_FAP	32.23		NON2	-0.13	1.15667	2.76667	7.49667
NON2-GAPDH	25.99		INV5a_FAP	29.65		INV3	4.41667	6.12333	5.79	9.26333
NON2-GAPDH	26.06		INV5a_FAP	29.04		NON4	2.75667	3.74	4.31333	7.75
NON4-PDGFRb	31.3		INV5a_PDGFRa	30.81		INV5	7.19	8.06333	7.17	8.57
NON4-PDGFRb	31.51		INV5a_PDGFRa	29		NON6	3.29333	4.71	4.75667	6.7
NON4-PDGFRb	30.91		INV5a_PDGFRa	28.43		INV7	5.95667	7.04667	6.53333	9
NON4-PDGFRa	27.67		INV5a_PDGFRb	31.07		NON8	2.92	5.60333	4.55667	6.31333
NON4-PDGFRa	27.69		INV5a_PDGFRb	31
NON4-PDGFRa	28.05		INV5a_PDGFRb	30.37			ddCt
NON4-FAP	27.3		INV7a_SMA	28.96			aSMA	FAP	PDGFRa	PDGFRb
NON4-FAP	27.14		INV7a_SMA	27.93		INV1	-1.25583	-1.18583	-0.355833	0.651667
NON4-FAP	27.25		INV7a_SMA	27.12		NON2	-5.56583	-5.52583	-3.6125	-1.665
NON4-aSMA	26.14		INV7a_FAP	29.91		INV3	-1.01917	-0.559167	-0.589167	0.101667
NON4-aSMA	26.09		INV7a_FAP	29.05		NON4	-2.67917	-2.9425	-2.06583	-1.41167
NON4-aSMA	26.51		INV7a_FAP	28.32		INV5	1.75417	1.38083	0.790833	-0.591667
NON2-PDGFRb	33.37		INV7a_PDGFRa	28.88		NON6	-2.1425	-1.9725	-1.6225	-2.46167
NON2-PDGFRb	32.99		INV7a_PDGFRa	28.48		INV7	0.520833	0.364167	0.154167	-0.161667
NON2-PDGFRb	34.18		INV7a_PDGFRa	28.38		NON8	-2.51583	-1.07917	-1.8225	-2.84833
NON2-PDGFRa	28.72		INV7a_PDGFRb	31.03
NON2-PDGFRa	28.63		INV7a_PDGFRb	30.91		Fold Change
NON2-PDGFRa	29		INV7a_PDGFRb	31.2			aSMA	FAP	PDGFRa	PDGFRb
NON2-FAP	27.07		INV5a_GAPDH	23.05		INV1	2.38805	2.27495	1.27972	0.636545
NON2-FAP	27.22		INV5a_GAPDH	21.96		NON2	47.3678	46.0725	12.2313	3.17114
NON2-FAP	27.23		INV5a_GAPDH	21.72		INV3	2.02675	1.47342	1.50438	0.931956
NON2-ASMA	25.32		aSMA NTC	N/A		NON4	6.40486	7.68742	4.18676	2.66044
NON2-ASMA	25.39		aSMA NTC	N/A		INV5	0.296444	0.383997	0.57801	1.50699
NON2-ASMA	26.95		aSMA NTC	N/A		NON6	4.41526	3.92448	3.07908	5.50853
GAPDH NTC	38.24		FAP NTC	N/A		INV7	0.696969	0.776918	0.898651	1.11858
GAPDH NTC	N/A		FAP NTC	N/A		NON8	5.71928	2.11282	3.53694	7.20168
GAPDH NTC	37.42		FAP NTC	N/A
PDGFRb NTC	N/A		PDGFRa NTC	N/A
PDGFRb NTC	N/A		PDGFRa NTC	N/A
PDGFRb NTC	N/A		PDGFRa NTC	N/A
INV3-GAPDH	22.82		INV7a_GAPDH	22.77
INV3-GAPDH	23		INV7a_GAPDH	21.77
INV3-GAPDH	23.45		INV7a_GAPDH	21.6
PDGFRa NTC	N/A		PDGFRB NTC	N/A
PDGFRa NTC	N/A		PDGFRB NTC	N/A
PDGFRa NTC	N/A		PDGFRB NTC	N/A
FAP NTC	N/A		GAPDH NTC	37.2
FAP NTC	N/A		GAPDH NTC	36.45
FAP NTC	N/A		GAPDH NTC	39.08
aSMA NTC	N/A		NON6a_aSMA	27.06
aSMA NTC	N/A		NON6a_aSMA	26.08
aSMA NTC	N/A		NON6a_aSMA	25.26
INV1-GAPDH	22.7		NON6a_FAP	28.43
INV1-GAPDH	22.61		NON6a_FAP	27.18
INV1-GAPDH	22.93		NON6a_FAP	27.04
INV3-PDGFRb	33.22		NON6a_PDGFRa	27.99
INV3-PDGFRb	31.81		NON6a_PDGFRa	27.55
INV3-PDGFRb	32.03		NON6a_PDGFRa	27.25
INV3-PDGFRa	28.53		NON6a_PDGFRb	29.5
INV3-PDGFRa	28.95		NON6a_PDGFRb	29.61
INV3-PDGFRa	29.16		NON6a_PDGFRb	29.51
INV3-FAP	28.97		NON8a_aSMA	26.03
INV3-FAP	29.28		NON8a_aSMA	24.63
INV3-FAP	29.39		NON8a_aSMA	24.3
INV3-aSMA	27.39		NON8a_FAP	28.41
INV3-aSMA	27.44		NON8a_FAP	27.38
INV3-aSMA	27.69		NON8a_FAP	27.22
INV1-PDGFRb	32.99		NON8a_PDGFRa	27.18
INV1-PDGFRb	32.03		NON8a_PDGFRa	26.4
INV1-PDGFRb	32.66		NON8a_PDGFRa	26.29
INV1-PDGFRa	28.85		NON8a_PDGFRb	29.05
INV1-PDGFRa	28.72		NON8a_PDGFRb	27.99
INV1-PDGFRa	28.74		NON8a_PDGFRb	28.1
INV1-FAP	28.08		NON6a_GAPDH	23.19
INV1-FAP	28.23		NON6a_GAPDH	22.82
INV1-FAP	28.42		NON6a_GAPDH	22.51
INV1-aSMA	26.61		NON8a_GADPH	22.43
INV1-aSMA	27.06		NON8a_GADPH	22.12
INV1-aSMA	27.11		NON8a_GADPH	21.65

## Sheet: H
SAMPLE	Cq		SAMPLE	Cq
INV1A-COL	27.31		INV5a-Col	26.98		ΔCt = Δ(gene)-Δ(GAPDH)				ave dCt
INV1A-COL	26.93		INV5a-Col	26.06			COL1	FN			COL1	FN
INV1A-COL	27.01		INV5a-Col	25.61		INV1A	6.78667	2.55333		INV	6.16833	2.71083
INV1A-FN	23.27		INV5a-Fn	24.51		INV3A	7.04667	2.48
INV1A-FN	22.72		INV5a-Fn	24.4		NON2A	3.88833	0.08
INV1A-FN	22.56		INV5a-Fn	24.23		NON4A	4.88833	0.936667
INV3A-COL	30.83		INV7a-Col	26.35		INV5A	4.26333	2.42667
INV3A-COL	28.26		INV7a-Col	25.84		INV7A	6.57667	3.38333
INV3A-COL	28.19		INV7a-Col	25.39		NON6A	3.64	1.65667
INV3A-FN	24.55		INV7a-Fn	23.05		NON8A	3.71667	0.79
INV3A-FN	24.63		INV7a-Fn	22.81
INV3A-FN	24.4		INV7a-Fn	22.14		ΔΔCt
INV1A-GAPDH	21.69		INV5a_GAPDH	22.3			COL1	FN
INV1A-GAPDH	19.85		INV5a_GAPDH	21.98		INV1A	0.618333	-0.1575
INV1A-GAPDH	19.35		INV5a_GAPDH	21.58		INV3A	0.878333	-0.230833
INV3-GAPDH	22.89		INV7a_GAPDH	19.59		NON2A	-2.28	-2.63083
INV3-GAPDH	21.81		INV7a_GAPDH	19.3		NON4A	-1.28	-1.77417
INV3-GAPDH	21.44		INV7a_GAPDH	18.96		INV5A	-1.905	-0.284167
NON2-COL	28.8		NON6a_Col	24.12		INV7A	0.408333	0.6725
NON2-COL	26.42		NON6a_Col	24.03		NON6A	-2.52833	-1.05417
NON2-COL	26.35		NON6a_Col	23.58		NON8A	-2.45167	-1.92083
NON2-FN	23.47		NON6a_fn	22.18
NON2-FN	22.5		NON6a_fn	22.09		FOLD CHANGE
NON2-FN	21.76		NON6a_fn	21.51			COL1	FN
NON4-COL	30		NON8a_col	24.99		INV1A	0.651423	1.11535
NON4-COL	26.75		NON8a_col	24.77		INV3A	0.543996	1.17351
NON4-COL	26.44		NON8a_col	25.64		NON2A	4.85678	6.19384
NON4-FN	23.07		NON8a_fn	22.75		NON4A	2.42839	3.4204
NON4-FN	22.56		NON8a_fn	22.42		INV5A	3.74509	1.21771
NON4-FN	22.3		NON8a_fn	21.45		INV7A	0.753493	0.627419
NON2-GAPDH	23.32		NON6a_GAPDH	20.78		NON6A	5.76905	2.07652
NON2-GAPDH	22.26		NON6a_GAPDH	20.21		NON8A	5.47048	3.78642
NON2-GAPDH	21.91		NON6a_GAPDH	19.82
NON4-GAPDH	23.08		NON8a_GAPDH	22.1
NON4-GAPDH	21.35		NON8a_GAPDH	21.29
NON4-GAPDH	20.69		NON8a_GAPDH	20.86
Well	Cq		Well	Cq
INV1a_Col4	30.32		INV5a_Col4	31.01
INV1a_Col4	29.11		INV5a_Col4	30.64				dCt
INV1a_Col4	28.52		INV5a_Col4	30.3			Col4	TenC	Per
INV1a_TenC	26.2		INV5a_TenC	28.39		INV1a	8.54333	4.11333	3.04667
INV1a_TenC	24.45		INV5a_TenC	27.53		INV3a	6.75	2.50333	1.78
INV1a_TenC	24.01		INV5a_TenC	27.07		NON2a	5.47333	2.15667	2.12333
INV1a_Per	25.36		INV5a_Per	29.57		NON4a	6.32	1.82333	1.33667
INV1a_Per	23.41		INV5a_Per	27.36		INV5a	7.04	4.05333	3.93333
INV1a_Per	22.69		INV5a_Per	25.7		INV7a	7.30667	4.05667	4.23333
INV1a_GAPDH	21.43		INV5a_GAPDH	25.2		NON6a	5.75333	1.84333	1.66667
INV1a_GAPDH	20.68		INV5a_GAPDH	23.08		NON8a	6.26	2.06	2.05667
INV1a_GAPDH	20.21		INV5a_GAPDH	22.55
INV3a_Col4	33.06		INV7a_Col4	28.07				ave dCt
INV3a_Col4	31.32		INV7a_Col4	27.12			Col4	TenC	Per
INV3a_Col4	30.7		INV7a_Col4	26.84		INV	7.41	3.68167	3.24833
INV3a_TenC	28.33		INV7a_TenC	25.2
INV3a_TenC	27.21		INV7a_TenC	23.78				ddCt
INV3a_TenC	26.8		INV7a_TenC	23.3			Col4	TenC	Per
INV3a_Per	28.45		INV7a_Per	26.47		INV1a	1.13333	0.431667	-0.201667
INV3a_Per	26.12		INV7a_Per	23.23		INV3a	-0.66	-1.17833	-1.46833
INV3a_Per	25.6		INV7a_Per	23.11		NON2a	-1.93667	-1.525	-1.125
INV3a_GAPDH	25.92		INV7a_GAPDH	21.67		NON4a	-1.09	-1.85833	-1.91167
INV3a_GAPDH	24.63		INV7a_GAPDH	19.36		INV5a	-0.37	0.371667	0.685
INV3a_GAPDH	24.28		INV7a_GAPDH	19.08		INV7a	-0.103333	0.375	0.985
NON2a_Col4	28.6		NON6a_Col4	28.41		NON6a	-1.65667	-1.83833	-1.58167
NON2a_Col4	27.23		NON6a_Col4	27.39		NON8a	-1.15	-1.62167	-1.19167
NON2a_Col4	26.74		NON6a_Col4	27.34
NON2a_TenC	25.12		NON6a_TenC	24.17				FC
NON2a_TenC	23.93		NON6a_TenC	23.69			Col4	TenC	Per
NON2a_TenC	23.57		NON6a_TenC	23.55		INV1a	0.455861	0.741405	1.15003
NON2a_Per	25.41		NON6a_Per	25.26		INV3a	1.58008	2.26315	2.76702
NON2a_Per	23.78		NON6a_Per	23.09		INV5a	1.29235	0.772889	0.622006
NON2a_Per	23.33		NON6a_Per	22.53		INV7a	1.07425	0.771105	0.505226
NON2a_GAPDH	23.14		NON6a_GAPDH	24.03		NON2a	3.8282	2.87787	2.18102
NON2a_GAPDH	21.88		NON6a_GAPDH	21.1		NON4a	2.12874	3.62589	3.76244
NON2a_GAPDH	21.13		NON6a_GAPDH	20.75		NON6a	3.15287	3.57597	2.99315
NON4a_Col4	30.14		NON8a_Col4	26.69		NON8a	2.21914	3.0773	2.28416
NON4a_Col4	29.54		NON8a_Col4	25.44
NON4a_Col4	29.16		NON8a_Col4	25.2
NON4a_TenC	26.04		NON8a_TenC	23.23
NON4a_TenC	25.09		NON8a_TenC	20.8
NON4a_TenC	24.22		NON8a_TenC	20.7
NON4a_Per	25.51		NON8a_Per	23.48
NON4a_Per	24.55		NON8a_Per	20.94
NON4a_Per	23.83		NON8a_Per	20.3
NON4a_GAPDH	24.13		NON8a_GAPDH	21.4
NON4a_GAPDH	23.12		NON8a_GAPDH	19.06
NON4a_GAPDH	22.63		NON8a_GAPDH	18.09

## Sheet: I
	INV1	INV3	INV5	INV7	NON2	NON4	NON6	NON8
DAPI area	4.63579e+06	3.94512e+06	7.56445e+06	5.28684e+06	3.39638e+06	2.18501e+06	2.2599e+06	1.0767e+06
RFP area	395548	259232	991699	1.02192e+06	778154	1.57705e+06	910053	341386
RFP/DAPI	0.0853247	0.0657094	0.1311	0.193294	0.229113	0.721756	0.402697	0.317066
RFP threshold	23944	65535
DAPI threshold	20623	65535

## Sheet: LMNOPQ
genes	inv-1	inv-2	inv-3	non-1	non-2	non-3
TGFB2	4138	4698	4605	8403	7435	8694	secreted
TGFB1	4917	6465	5584	3508	3339	3836	secreted
TGFB3	100	109	135	54	23	57	secreted
IL4	0	3	0	0	1	0	inflammatory
IL10	2	9	1	0	0	0	inflammatory
IL1A	12	12	19	18	11	13	inflammatory
IL13	0	0	0	0	0	1	inflammatory
IL1B	45	40	28	38	31	27	inflammatory
PDGFA	863	1102	1004	241	239	261	secreted
PDGFB	8	11	15	72	58	86	secreted
PDGFC	6732	8594	8057	6630	5971	7127	secreted
PDGFD	98	170	128	7	10	11	secreted
FGF1	270	391	309	205	173	164	secreted
NOTCH2	15777	21236	18381	23870	23040	24667	cell-cell
S100A11	8029	11102	9702	9114	8794	9044	secreted
TGM2	21874	28842	26099	45525	44522	46665	secreted
SHH	65	87	95	15	23	13	secreted
EGF	135	130	153	347	255	296	secreted
FN1	18701	23625	21890	6094	5708	5780	matrix
COL1A1	590	784	696	278	276	356	matrix
COL4A1	2854	3900	3432	2581	2493	2907	matrix
LAMA1	35	39	41	25	15	27	matrix
TNC	4759	6695	5391	1077	940	1056	matrix
ALL GENES
SUM	90004	118044	105765	108102	103357	111088
number of genes	23	23	23	23	23	23
	3913.22	5132.35	4598.48	4700.09	4493.78	4829.91
Inflammatory
SUM	59	64	48	56	43	41
number of genes	5	5	5	5	5	5
	11.8	12.8	9.6	11.2	8.6	8.2
Matrix Ligands
SUM	26939	35043	31450	10055	9432	10126
number of genes	5	5	5	5	5	5
	5387.8	7008.6	6290	2011	1886.4	2025.2
Cell-cell
SUM	15777	21236	18381	23870	23040	24667
number of genes	1	1	1	1	1	1
	15777	21236	18381	23870	23040	24667
Extracellular secreted
SUM	386033	338804	277103	221217	147096	76254
number of genes	72	60	48	36	24	12
	5361.57	5646.73	5772.98	6144.92	6129	6354.5
