# Supplementary material for: Weakly migratory metastatic breast cancer cells activate fibroblasts via microvesicle-Tg2 to facilitate dissemination and metastasis
Source: eLife journal article supplement (doi:10.7554/elife.74433), 2022-12-06
Supplement: supp [file Source Data Figure 2 - SuppFig1.xlsx]

## Sheet: C
	CTRL1	Cell Area	Fn Area	Fn Frac		MV+_1	Cell Area	Fn Area	Fn Frac		MV-_1	Cell Area	Fn Area	Fn Frac
		1225.66	153.99	0.125638			1296.02	68.397	0.0527748			2037.04	392.791	0.192824
		770.731	186.429	0.241886			1306.96	298.99	0.228768			1538.73	1262.4	0.820422
		1815.83	433.048	0.238485			876.648	238.802	0.272404			2001.09	505.743	0.252734
		1510.98	629.248	0.416451			1172.9	417.023	0.355548			1714.6	18.76	0.0109413
		1010.71	110.998	0.109822			882.901	23.45	0.0265602			999.371	42.601	0.0426278
		1015	112.561	0.110897			641.755	0	0			1116.62	284.529	0.254812
		1570.38	278.667	0.177452			1279.6	383.411	0.299633			1008.75	127.413	0.126308
		1077.15	158.289	0.146952			1823.26	82.076	0.0450162			1200.65	257.562	0.214518
		2396.61	911.823	0.380463			2231.68	19.933	0.00893184			2670.59	310.716	0.116347
		1561.39	219.65	0.140675			958.724	161.025	0.167958			988.427	24.623	0.0249113
		1349.95	5.863	0.00434312			1314.38	602.671	0.458519			1505.9	407.643	0.270698
		1226.45	16.415	0.0133842			862.578	189.947	0.220208			1450.79	576.485	0.39736
		1279.6	254.044	0.198534			1433.98	73.087	0.0509679			792.618	135.23	0.170612
		1140.46	720.313	0.631597			592.118	10.943	0.0184811			1532.47	617.132	0.402703
		830.92	347.454	0.418156			998.589	17.588	0.0176129			3379.96	1338.62	0.396045
		1356.2	127.413	0.0939482			1346.83	20.714	0.0153799			1683.73	544.827	0.323584
		2692.48	161.416	0.0599507			742.2	22.669	0.030543			2639.71	898.535	0.340391
		925.893	78.949	0.085268			1203.78	209.489	0.174026			755.488	211.052	0.279359
		1774.79	447.509	0.252147			1082.23	98.491	0.0910076			893.845	305.635	0.341933
		1375.75	481.511	0.35			1350.34	8.989	0.00665683			1986.23	224.341	0.112948
		2797.22	532.711	0.190443			1254.98	127.804	0.101838			968.104	560.07	0.578523
		1324.94	98.491	0.0743363								1775.18	869.613	0.489872
		539.746	21.496	0.0398261
		445.164	1.563	0.00351107
		481.121	118.033	0.245329
		938.009	350.581	0.37375
		1022.82	176.658	0.172716
		648.008	102.79	0.158625
	CTRL2	Cell Area	Fn Area	Fn Frac		MV+_2	Cell Area	Fn Area	Fn Frac		MV-_2	Cell Area	Fn Area	Fn Frac
		786.364	1.173	0.00149168			805.515	0.782	0.000970807			2108.96	491.282	0.23295
		1007.19	0	0			1181.5	25.404	0.0215015			1841.23	104.744	0.0568879
		625.339	125.068	0.2			467.441	26.968	0.0576928			1378.48	144.219	0.104622
		866.095	40.256	0.0464799			1344.87	4.299	0.00319659			2017.11	1162.35	0.576245
		748.062	193.074	0.258099			1376.53	39.475	0.0286772			1852.96	1267.88	0.684244
		731.256	41.038	0.0561199			1906.89	203.235	0.106579			590.946	59.016	0.099867
		893.845	28.922	0.0323568			1574.29	36.348	0.0230885			2109.74	447.899	0.212301
		1160.79	62.925	0.054209			1443.75	8.208	0.00568518			2309.07	947.78	0.41046
		1894.39	341.201	0.180111			1593.44	111.389	0.0699046			921.985	172.359	0.186943
		2005.78	448.681	0.223694			1419.13	317.36	0.22363			1029.46	553.816	0.537965
		777.766	161.416	0.207538			1362.85	45.728	0.0335532			3218.54	825.057	0.256345
		1815.83	130.93	0.0721048			674.976	61.752	0.0914877			1443.36	960.678	0.665584
		897.362	139.138	0.155052			722.658	50.418	0.0697674			5250.9	2261.38	0.430666
		1236.22	37.52	0.0303506			1420.69	47.291	0.0332873			1795.12	74.259	0.0413673
		813.723	7.817	0.00960646			1851.79	765.259	0.413254			894.235	125.068	0.13986
		643.318	101.227	0.157351			1674.35	916.122	0.547152			2245.75	29.313	0.0130527
		251.308	173.532	0.690515			1414.44	211.443	0.149489			2617.44	1049.79	0.401075
		477.212	94.973	0.199016			4447.34	166.887	0.0375252			3660.58	344.718	0.0941703
							3091.91	479.948	0.155227			4672.85	1763.07	0.3773
							691.391	44.555	0.0644426			1577.81	664.423	0.421105
							981.001	203.626	0.20757			1387.47	607.752	0.438028
							919.249	139.92	0.152211			1760.72	111.779	0.0634848
							966.931	140.311	0.14511			1999.52	997.807	0.499023
							1077.93	330.648	0.306744			560.461	243.492	0.434449
							1102.94	186.039	0.168675
							1271.78	484.638	0.381069
							1262.01	470.568	0.372871
							688.655	222.777	0.323496
							3048.53	998.589	0.327564
							1295.23	617.914	0.477067
							791.054	261.861	0.331028
							760.96	152.427	0.200309
	CTRL3	Cell Area	Fn Area	Fn Frac		MV+_3	Cell Area	Fn Area	Fn Frac		MV-_3	Cell Area	Fn Area	Fn Frac/Area
		425.622	14.461	0.0339762			1044.32	122.723	0.117515			1985.84	462.751	0.233025
		1387.47	519.813	0.374648			1301.49	305.244	0.234535			1822.08	672.631	0.369155
		1047.05	32.83	0.0313547			1946.76	217.305	0.111624			1948.71	741.418	0.380465
		1233.09	24.623	0.0199685			2570.93	377.94	0.147005			2456.41	961.85	0.391567
		737.51	188.774	0.255961			963.414	145.391	0.150912			378.721	21.496	0.0567595
		747.672	24.623	0.0329329			915.341	95.364	0.104184			2087.85	493.237	0.236241
		1080.66	57.844	0.0535263			408.816	7.035	0.0172082			1478.54	204.408	0.13825
		931.756	62.143	0.0666945			685.138	14.07	0.020536			976.311	292.737	0.29984
		940.745	80.512	0.0855832			883.292	77.386	0.0876109			2289.13	511.606	0.223493
		355.662	26.186	0.0736261			1337.05	68.006	0.0508626			1641.52	374.031	0.227857
		586.256	105.135	0.179333			1540.68	98.491	0.063927			2011.25	436.565	0.217062
		837.955	185.257	0.221082			1800.59	82.857	0.0460167			773.467	346.673	0.448207
		972.794	128.585	0.132181			922.767	55.108	0.0597204			1760.33	239.192	0.135879
		471.35	42.992	0.0912104								1402.71	209.098	0.149067
		560.851	134.448	0.239721								2466.57	171.578	0.0695613
		612.051	94.583	0.154535
		1203.78	230.985	0.191883
		571.404	51.591	0.0902881
		1030.25	285.311	0.276935
		1673.57	86.766	0.051845

## Sheet: E
	removed from analysis due to inadequate bead tracking
	Ctrl								MV+								MV-
CTRL1	Replicate 1								Replicate 1							NON1	Replicate 1
Cell #	m2	um2	N	nN	Pa	kPa		Cell #	m2	um2	N	nN	Pa	kPa		Cell #	m2	um2	N	nN	Pa	kPa
1	2.079e-09	2079	9.629e-07	962.9	463.155	0.463155		1	8.996e-10	899.6	5.442e-06	5442	6049.36	6.04936		1	1.986e-09	1986	5.153e-06	5153	2594.66	2.59466
2	1.448e-09	1448	5.675e-07	567.5	391.92	0.39192		2	7.115e-10	711.5	3.948e-07		554.884			2	2.112e-09	2112	2.595e-06		1228.69
3	1.028e-09	1028	1.171e-07	117.1	113.911	0.113911		3	6.763e-10	676.3	1.925e-07	192.5	284.637	0.284637		3	1.607e-09	1607	6.426e-06		3998.76
4	2.439e-09	2439	8.991e-07	899.1	368.635	0.368635		4	1.565e-09	1565	1.717e-06	1717	1097.12	1.09712		4	1.9e-09	1900	1.522e-06	1522	801.053	0.801053
5	9.512e-10	951.2	1.964e-07	196.4	206.476	0.206476		5	1.045e-09	1045	2.324e-06	2324	2223.92	2.22392		5	1.647e-09	1647	8.697e-07	869.7	528.051	0.528051
6	8.752e-10	875.2	2.87e-08	28.7	32.7925	0.0327925		6	7.218e-10	721.8	6.518e-07		903.02			6	3.088e-09	3088	5.608e-06	5608	1816.06	1.81606
7	1.755e-09	1755	4.401e-07	440.1	250.769	0.250769		7	3.29e-09	3290	4.332e-06	4332	1316.72	1.31672		7	3.977e-09	3977	3.947e-06	3947	992.457	0.992457
8	1.907e-09	1907	2.882e-06	2882	1511.27	1.51127		8	1.232e-09	1232	2.008e-06	2008	1629.87	1.62987		8	1.906e-09	1906	7.46e-06	7460	3913.96	3.91396
9	9.586e-10	958.6	7.436e-08	74.36	77.5715	0.0775715		9	1.137e-09	1137	7.554e-07	755.4	664.38	0.66438		9	1.721e-09	1721	2.118e-07	211.8	123.068	0.123068
10	1.26e-09	1260	7.503e-07	750.3	595.476	0.595476		10	9.454e-10	945.4	3.946e-07	394.6	417.389	0.417389		10	8.777e-09	8777	1.714e-05	17140	1952.83	1.95283
11	1.168e-09	1168	1.635e-06	1635	1399.83	1.39983		11	1.997e-09	1997	4.199e-06	4199	2102.65	2.10265		11	2.851e-09	2851	1.542e-05	15420	5408.63	5.40863
12	1.279e-09	1279	1.611e-06	1611	1259.58	1.25958		12	1.567e-09	1567	1.011e-06	1011	645.182	0.645182		12	4.046e-09	4046	4.184e-06	4184	1034.11	1.03411
13	1.049e-09	1049	4.473e-06		4264.06			13	1.103e-09	1103	3.856e-07		349.592			13	2.846e-09	2846	1.167e-06	1167	410.049	0.410049
14	1.626e-09	1626	6.77e-07	677	416.359	0.416359		14	2.417e-09	2417	5.346e-06	5346	2211.83	2.21183		14	2.368e-09	2368	5.502e-06	5502	2323.48	2.32348
15	1.066e-09	1066	5.142e-07	514.2	482.364	0.482364		15	2.322e-09	2322	4.616e-06	4616	1987.94	1.98794		15	2.041e-09	2041	6.083e-06	6083	2980.4	2.9804
16	1.341e-09	1341	5.153e-06	5153	3842.65	3.84265		16	1.665e-09	1665	3.094e-07	309.4	185.826	0.185826		16	2.774e-09	2774	3.028e-06	3028	1091.56	1.09156
17	9.257e-10	925.7	1.57e-06	1570	1696.01	1.69601		17	1.312e-09	1312	7.044e-07	704.4	536.89	0.53689		17	1.009e-09	1009	4.575e-07	457.5	453.419	0.453419
18	2.113e-09	2113	9.269e-07	926.9	438.665	0.438665		18	3.935e-09	3935	3.409e-06	3409	866.328	0.866328		18	1.372e-09	1372	5.05e-07	505	368.076	0.368076
19	1.953e-09	1953	2.734e-06		1399.9			19	1.049e-09	1049	8.691e-07	869.1	828.503	0.828503		19	1.778e-09	1778	2.569e-07	256.9	144.488	0.144488
20	1.11e-09	1110	9.559e-06		8611.71			20	1.856e-09	1856	4.061e-06	4061	2188.04	2.18804		20	2.047e-09	2047	2.031e-06	2031	992.184	0.992184
21	2.655e-09	2655	9.679e-06	9679	3645.57	3.64557		21	1.024e-09	1024	2.637e-07		257.52			21	1.776e-09	1776	1.098e-06	1098	618.243	0.618243
22	1.647e-09	1647	4.803e-06		2916.21			22	7.381e-10	738.1	1.218e-06	1218	1650.18	1.65018		22	2.595e-09	2595	3.998e-06	3998	1540.66	1.54066
23	1.608e-09	1608	4.922e-07	492.2	306.095	0.306095		23	1.587e-09	1587	5.863e-07		369.439			23	3.771e-09	3771	1.76e-06	1760	466.72	0.46672
24	1.44e-09	1440	9.077e-07	907.7	630.347	0.630347		24	1.7e-09	1700	3.322e-06	3322	1954.12	1.95412		24	3.916e-09	3916	4.171e-06	4171	1065.12	1.06512
25	2.194e-09	2194	8.764e-07	876.4	399.453	0.399453		25	6.193e-10	619.3	7.843e-08		126.643			25	1.773e-09	1773	1.071e-06	1071	604.061	0.604061
26	1.288e-09	1288	7.978e-07	797.8	619.41	0.61941		26	1.845e-09	1845	1.007e-05	10070	5457.99	5.45799		26	2.658e-09	2658	1.608e-07	160.8	60.4966	0.0604966
27	1.096e-09	1096	3.784e-07	378.4	345.255	0.345255		27	3.122e-09	3122	5.864e-06	5864	1878.28	1.87828		27	2.057e-09	2057	5.252e-06	5252	2553.23	2.55323
	Replicate 2								Replicate 2								Replicate 2
Cell #	m2	um2	N	nN	Pa	kPa		Cell #	m2	um2	N	nN	Pa	kPa		Cell #	m2	um2	N	nN	Pa	kPa
1	2.298e-09	2298	7.776e-06	7776	3383.81	3.38381		1	1.37e-09	1370	4.942e-07	494.2	360.73	0.36073		1	2.439e-09	2439	1.493e-05		6121.36
2	5.585e-10	558.5	3.8e-06		6803.94			2	9.717e-10	971.7	4.95e-07	495	509.416	0.509416		2	1.803e-09	1803	5.97e-06	5970	3311.15	3.31115
3	7.559e-10	755.9	5.117e-07	511.7	676.941	0.676941		3	1.394e-09	1394	7.923e-07	792.3	568.364	0.568364		3	2.294e-09	2294	1.212e-05	12120	5283.35	5.28335
4	6.186e-10	618.6	1.908e-07	190.8	308.438	0.308438		4	8.532e-10	853.2	7.749e-08	77.49	90.8228	0.0908228		4	2.009e-09	2009	2.377e-07		118.318
5	1.991e-09	1991	1.755e-06	1755	881.467	0.881467		5	1.402e-09	1402	1.57e-06	1570	1119.83	1.11983		5	1.796e-09	1796	1.944e-06		1082.41
6	2.155e-09	2155	3.479e-06	3479	1614.39	1.61439		6	1.536e-09	1536	2.756e-06	2756	1794.27	1.79427		6	1.992e-09	1992	1.445e-06	1445	725.402	0.725402
7	1.413e-09	1413	4.126e-06	4126	2920.03	2.92003		7	1.476e-09	1476	1.952e-06	1952	1322.49	1.32249		7	2.018e-09	2018	7.237e-07	723.7	358.622	0.358622
8	1.313e-09	1313	6.427e-07	642.7	489.49	0.48949		8	3.081e-09	3081	1.75e-06	1750	567.997	0.567997		8	1.917e-09	1917	1.01e-06	1010	526.865	0.526865
9	8.097e-10	809.7	6.515e-07		804.619			9	1.402e-09	1402	7.507e-07	750.7	535.449	0.535449		9	2.606e-09	2606	3.042e-06	3042	1167.31	1.16731
10	1.069e-09	1069	3.115e-06		2913.94			10	1.061e-09	1061	4.18e-07	418	393.968	0.393968		10	1.747e-09	1747	3.594e-07	359.4	205.724	0.205724
11	2.653e-09	2653	7.799e-06		2939.69			11	8.093e-10	809.3	4.14e-07	414	511.553	0.511553		11	1.7e-09	1700	5.77e-06		3394.12
12	7.494e-10	749.4	9.669e-07		1290.23			12	1.387e-09	1387	3.737e-07	373.7	269.43	0.26943		12	2.108e-09	2108	1.864e-05		8842.5
13	2.584e-09	2584	3.895e-06	3895	1507.35	1.50735		13	2.21e-09	2210	7.338e-07	733.8	332.036	0.332036		13	2.66e-09	2660	2.102e-06		790.226
14	8.495e-10	849.5	3.602e-07	360.2	424.014	0.424014		14	2.179e-09	2179	1.253e-06	1253	575.034	0.575034		14	1.12e-09	1120	6.668e-06		5953.57
15	1.172e-09	1172	1.07e-05		9129.69			15	1.078e-09	1078	1.424e-06	1424	1320.96	1.32096		15	2.747e-09	2747	1.434e-06		522.024
16	1.59e-09	1590	7.065e-06	7065	4443.4	4.4434		16	9.119e-10	911.9	2.719e-07	271.9	298.169	0.298169		16	2.687e-09	2687	4.292e-06	4292	1597.32	1.59732
17	9.68e-10	968	2.094e-06	2094	2163.22	2.16322		17	1.915e-09	1915	9.212e-07	921.2	481.044	0.481044		17	2.563e-09	2563	4.45e-06		1736.25
18	9.147e-10	914.7	1.703e-05		18618.1			18	1.46e-09	1460	3.619e-06	3619	2478.77	2.47877		18	1.823e-09	1823	2.194e-06	2194	1203.51	1.20351
19	1.778e-09	1778	8.535e-06	8535	4800.34	4.80034		19	1.223e-09	1223	1.16e-06	1160	948.487	0.948487		19	1.573e-09	1573	2.905e-06	2905	1846.79	1.84679
20	1.148e-09	1148	1.812e-05		15784			20	1.232e-09	1232	1.552e-06	1552	1259.74	1.25974		20	2.13e-09	2130	3.801e-06	3801	1784.51	1.78451
21	1.784e-09	1784	1.275e-05		7146.86			21	1.856e-09	1856	8.92e-06	8920	4806.03	4.80603		21	1.86e-09	1860	3.075e-06	3075	1653.23	1.65323
22	7.786e-10	778.6	3.054e-06		3922.42			22	2.029e-09	2029	8.43e-06	8430	4154.76	4.15476		22	1.638e-09	1638	7.783e-07	778.3	475.153	0.475153
23	1.598e-09	1598	3.793e-06		2373.59			23	3.21e-09	3210	2.128e-06	2128	662.928	0.662928		23	1.97e-09	1970	3.862e-06		1960.41
24	9.41e-10	941	4.905e-06		5212.54			24	1.17e-09	1170	5.131e-07	513.1	438.547	0.438547		24	1.802e-09	1802	3.904e-06	3904	2166.48	2.16648
25	1.078e-09	1078	8.147e-07	814.7	755.751	0.755751		25	3.074e-09	3074	3.323e-06	3323	1081	1.081		25	1.736e-09	1736	2.014e-06	2014	1160.14	1.16014
	Replicate 3								Replicate 3								Replicate 3
Cell #	m2	um2	N	nN	Pa	kPa		1	1.951e-09	1951	1.552e-06	1552	795.489	0.795489		Cell #	m2	um2	N	nN	Pa	kPa
1	7.753e-10	775.3	1.153e-06		1487.17			2	1.619e-09	1619	1.029e-06	1029	635.578	0.635578		1	1.802e-09	1802	1.72e-05	17200	9544.95	9.54495
2	7.776e-10	777.6	4.438e-07	443.8	570.73	0.57073		3	1.06e-09	1060	5.887e-07	588.7	555.377	0.555377		2	2.897e-09	2897	2.418e-06	2418	834.657	0.834657
3	9.258e-10	925.8	3.195e-07	319.5	345.107	0.345107		4	1.679e-09	1679	1.586e-06	1586	944.61	0.94461		3	1.748e-09	1748	4.89e-07		279.748
4	1.152e-09	1152	1.075e-06		933.16			5	1.489e-09	1489	9.157e-07	915.7	614.976	0.614976		4	3.348e-09	3348	1.209e-06		361.111
5	9.379e-10	937.9	3.996e-07	399.6	426.058	0.426058		6	1.295e-09	1295	4.184e-07	418.4	323.089	0.323089		5	2.055e-09	2055	2.305e-06	2305	1121.65	1.12165
6	2.359e-09	2359	2.574e-07	257.4	109.114	0.109114		7	1.7e-09	1700	6.111e-07	611.1	359.471	0.359471		6	9.36e-09	9360	1.835e-05	18350	1960.47	1.96047
7	1.37e-09	1370	5.96e-07	596	435.036	0.435036		8	2.37e-09	2370	2.227e-06	2227	939.662	0.939662		7	2.796e-09	2796	3.474e-08		12.4249
8	2.359e-09	2359	1.686e-06	1686	714.71	0.71471		9	1.197e-09	1197	1.519e-05		12690.1			8	3.116e-09	3116	7.636e-07	763.6	245.058	0.245058
9								10	1.829e-09	1829	2.215e-06	2215	1211.04	1.21104		9	4.51e-09	4510	1.602e-06	1602	355.211	0.355211
10	8.766e-10	876.6	2.043e-07		233.06			11	8.419e-10	841.9	5.937e-07	593.7	705.191	0.705191		10	4.519e-09	4519	1.747e-06	1747	386.59	0.38659
11	2.395e-09	2395	7.165e-07	716.5	299.165	0.299165		12	1.602e-09	1602	1.157e-06	1157	722.222	0.722222		11	3.848e-09	3848	1.547e-06	1547	402.027	0.402027
12	8.66e-10	866	1.729e-07		199.654			13	6.009e-10	600.9	1.792e-07		298.219			12	2.926e-09	2926	1.381e-06	1381	471.975	0.471975
13	9.296e-10	929.6	4.909e-07		528.077			14	1.06e-09	1060	9.26e-06		8735.85			13	1.687e-09	1687	4.595e-07	459.5	272.377	0.272377
14	1.129e-09	1129	6.33e-07		560.673			15	1.357e-09	1357	1.13e-06	1130	832.719	0.832719		14	2.898e-09	2898	1.407e-06	1407	485.507	0.485507
15	2.347e-09	2347	3.572e-06	3572	1521.94	1.52194		16	2.076e-09	2076	1.501e-06	1501	723.025	0.723025		15	2.788e-09	2788	1.339e-06	1339	480.273	0.480273
16	2.218e-09	2218	2.166e-06	2166	976.555	0.976555		17	1.039e-09	1039	1.451e-05		13965.4			16	2.295e-09	2295	7.892e-07	789.2	343.878	0.343878
17	7.263e-10	726.3	2.941e-07	294.1	404.929	0.404929		18	1.226e-09	1226	1.161e-05		9469.82			17	2.582e-09	2582	7.489e-06		2900.46
18	7.828e-10	782.8	4.894e-07	489.4	625.192	0.625192		19	1.34e-09	1340	7.796e-07		581.791			18	4.068e-09	4068	4.305e-06	4305	1058.26	1.05826
								20	1.383e-09	1383	5.434e-06	5434	3929.14	3.92914		19	2.339e-09	2339	2.478e-06	2478	1059.43	1.05943
								21	2.999e-09	2999	5.78e-06	5780	1927.31	1.92731		20	2.46e-09	2460	3.354e-06	3354	1363.41	1.36341
								22	1.274e-09	1274	4.05e-06		3178.96			21	1.865e-09	1865	2.388e-06	2388	1280.43	1.28043
								23	9.547e-10	954.7	9.991e-07		1046.51			22	4.78e-09	4780	5.952e-06	5952	1245.19	1.24519
																23	3.616e-09	3616	3.215e-06	3215	889.104	0.889104
																24	2.229e-09	2229	8.05e-06	8050	3611.48	3.61148
																25	6.385e-09	6385	3.218e-06	3218	503.994	0.503994

## Sheet: H
Maximum cancer cell migration distance from spheroid core (um)
MDA-	MDA- +3T3	MDA- +3T3 +MV-	MDA- +3T3 +MV+	MDA- +MV-
523.197	834.624	984.108	878.223	616.625
566.797	741.196	1108.68	722.51	666.453
759.881	734.967	1631.88	778.567	573.025
604.168	672.682	865.766	928.052
840.852	809.709	1152.3	847.081
672.682	641.539	1208.34	853.309
467.14	485.826	660.225	828.395	921.823
653.996	591.711	934.28	1276.85	597.939
411.083	504.511	722.51	678.91	610.396
591.711	541.882	1121.14	1295.54	548.111
435.997	386.169	928.052	952.966
653.996	386.169	909.366	903.137	747.424
	809.709	1214.56	1121.14
741.196	759.881	1133.59	721.184	1021.48
1339.14	579.254	1046.39	1046.39	653.996
	759.881	965.423	1233.25	573.025
803.481	809.709	1177.19	641.539	336.341
653.996	915.595	909.366	828.395	573.025
703.824	741.196	1071.31	548.111	417.312
535.654	585.482	1065.08	691.367	691.367
541.882	834.624	809.709		759.881
467.14	1189.65	1170.96		871.995
398.626	1133.59	1133.59	579.254	423.54
1357.82	766.11	1457.48	1015.25	473.369
	1270.62	1083.77
	977.88	1009.02
	1133.59	1307.99
	1170.96	1258.16
	448.454	1009.02
	1295.54	971.651
	996.565	1264.39
		966.565

## Sheet: I
	Spheroid Area Index at 48h
	MV- Ctrl	3T3 CM	3T3-MV- CM
Rep1	1.26098	2.11661	1.60936
	1.73301	1.99195	1.76013
	1.13293	1.62835	1.61777
	2.22593	1.90233	1.9605
	2.12263	1.52897	2.12997
	1.05259	0.738573	1.37915
	1.04753	0.871435	1.23425
	1.37367	1.00152	1.10908
Rep2	1.26367	1.08315	1.53904
	0.958819	0.955464	1.19336
	1.63588	0.817933	1.17579
	0.862777	1.0336	1.88717
	0.967767	1.07679	1.23663
	1.13222
	2.17042
Rep3	1.92922	2.01255	1.59247
	3.66907	1.64945	3.42813
	3.4793	2.33888	1.30215
	1.23671	1.80486	2.41582
		2.03188

## Sheet: J
Maximum cancer cell migration distance from spheroid core (um)
MDA+	MDA+ +3T3	MDA+ +3T3 +MV+	MDA+ +3T3 +MV-
915.595	2647.13		1538.45
828.395	1370.28	1463.71	1613.19
809.709	1139.82	2092.79	1849.88
703.824	1575.82	1544.68	2036.73
641.539	1538.45		1426.33
560.568	1395.19	1694.16	1625.65
803.481	1139.82	1775.13	1712.85
604.168	1582.05	1513.53	1613.19
1046.39	971.651	903.137	2105.25
1258.16	878.223	977.88	1856.1
903.137	610.396	1040.16	2080.33
1133.59	952.966	1158.51	1719.08
1114.91	1089.99	1563.36	1631.88
971.651	1114.91	1476.16	2018.05
1395.19	1307.99	1675.48	1974.45
1283.08	1251.93	1613.19	1700.39
1295.54	1731.53	1463.71	1550.91
946.445	1538.45	1407.65	1251.94
1189.65	1644.33	1482.39	1395.19
822.361	1388.96	1382.73	1208.19
753.653	1638.1	1482.39	1295.54
691.367	1507.31	1582.05	1089.99
797.252	1538.45	1631.88	1613.19
691.367	1476.16	1687.93	1600.73
853.309	1357.82	1488.62
884.452	1482.39	2005.59
1183.42	1887.25	2099.02
778.567	1974.44	1762.67
	2018.05	1961.99
	1507.31	1993.13
	1606.96	2223.6
	1445.02	2051.64
		1351.59
		1270.62
		1569.59
		1594.51
		1463.71
		1912.16
		1588.28
		1731.53
		2429.13
		2236.04
		2030.5
		2148.84
		1955.76
		2099.02
		2472.73
		1856.1
		1501.08
		1052.62
		1332.91
		1469.93
		1002.79
		1357.82
		1158.51
		1538.45
