# Supplementary material for: Weakly migratory metastatic breast cancer cells activate fibroblasts via microvesicle-Tg2 to facilitate dissemination and metastasis
Source: eLife journal article supplement (doi:10.7554/elife.74433), 2022-12-06
Supplement: supp [file Source Data Figure 2.xlsx]

## Sheet: A
	# Mvs/Cell/Hour
	MV+	MV-
Rep1	0.27977	0.420168
Rep2	0.316742	0.775401
Rep3	0.285948	0.289486
Rep4	0.361296	0.36518
Rep5	0.492118	0.307798
Rep6	0.251277	0.281863
Rep7	0.201386	0.298623
Rep8	0.086967	0.568054
Rep9	0.143691	0.315638
Rep10	0.420168	0.68
Rep11	0.71736	0.86
Rep12	0.779589	0.28
Rep13	0.23	1.28
Rep14	0.25	0.91
Rep15	0.47	0.73
Rep16	0.26	0.56
Rep17	0.23
Rep18	0.31
Rep19	0.45

## Sheet: B
Size (nm)	MV+							MV-
0	0	0	0	0	0	0		0	0	0	0	0
50	0	0	0	0	0.156006	0.291121		0	0	0.170068	0	3.74332
100	0	0.411523	0.524476	1.20482	1.95008	2.76565		0.219298	0.673854	1.36054	0.962696	12.2995
150	8.98204	11.7284	10.2273	12.6506	14.5086	16.6667		11.4035	8.89488	12.9252	14.8616	33.066
200	28.4431	20.1646	27.0979	23.0924	21.1389	21.8341		22.1491	24.9326	25.6803	23.3454	22.8164
250	12.8742	12.3457	14.8601	12.9853	13.3385	15.6477		15.1316	14.8248	16.3265	13.8989	8.19964
300	12.5748	12.3457	16.0839	16.9344	16.4587	14.0466		14.4737	11.9946	15.3061	15.1624	9.98217
350	8.98204	9.25926	8.65385	11.6466	12.6365	12.3726		10.7456	9.02965	8.16327	10.8905	3.74332
400	6.58683	6.3786	7.34266	8.166	6.94228	7.27802		4.82456	5.52561	6.46258	5.65584	2.13904
450	5.68862	5.34979	5.06993	5.95716	4.9922	3.49345		5.48246	5.79515	7.14286	5.29483	2.13904
500	8.98204	9.67078	5.68182	3.41365	3.90016	2.98399		6.35965	6.33423	4.42177	5.35499	0.445633
550	2.99401	4.93827	1.83566	2.07497	2.26209	1.16448		5.48246	4.98652	0.170068	1.86522	0.802139
600	0.898204	3.29218	1.31119	0.669344	1.09204	0.946143		1.53509	1.75202	0.85034	1.56438	0.623886
650	1.79641	2.88066	0.786713	0.669344	0.156006	0.218341		0.438596	2.02156	0	0.421179	0
700	0	0.205761	0.174825	0.401606	0.156006	0.14556		0.877193	0.539084	0.510204	0.240674	0
750	0	0.617284	0.174825	0	0.156006	0		0	0.808625	0.510204	0.120337	0
800	0	0.411523	0	0.133869	0.156006	0		0.438596	0.539084	0	0.361011	0
850	0	0	0	0	0	0.14556		0	0.673854	0	0	0
900	0.299401	0	0	0	0	0		0	0.404313	0	0	0
950	0.299401	0	0	0	0	0		0	0	0	0	0
1000	0	0	0	0	0	0		0	0	0	0	0

## Sheet: E
	5/26/2021 blot2			6/16/21 blot 1 (bands 4-6)			6/16/21 blot 1 (last 3 bands)
	C1	I1	N1	C4	I4	N4	C5	I5	N5
pFAK	1975.45	3789.71	7555.73	2813.98	3651.64	5018.18	2438.86	8111.02	8470.02
FAK	5263.12	5325.95	7871.2	3195.69	3125.35	3733.74	2169.45	5289.4	4426.86
pFAK/FAK	0.375337	0.711555	0.959922	0.880556	1.1684	1.34401	1.12419	1.53345	1.91333
normalized	1	1.89578	2.55749	1	1.32688	1.52632	1	1.36405	1.70197

## Sheet: G
	062019_A_pico_45sec			090719_blotAD_pico_15sec			112119_blot2_dura			112119_blot3_dura
	Ctrl	MV+	MV-	Ctrl	MV+	MV-	Ctrl	MV+	MV-	Ctrl	MV+	MV-
aSMA	351.92	562.82	1167.36	7725.1	3603.08	4450.45	1359.55	2967.98	6498	2995.03	3632.03	6364.05
GAPDH	3549.86	5683.23	6317.86	6645.4	2799.79	1708.84	3905.98	4512.76	6305.42	4354.69	6326.35	5404.05
aSMA/GAPDH	0.0991363	0.0990318	0.184771	1.16247	1.28691	2.60437	0.348068	0.657687	1.03054	0.687772	0.574112	1.17764
Normalized	1	0.998946	1.8638	1	1.10705	2.24036	1	1.88953	2.96075	1	0.834742	1.71226

## Sheet: H
	Cell Area (um^2)
	Ctrl	MV+	MV-
Rep1	2079	899.6	1986
	1448	711.5	2112
	1028	676.3	1607
	2439	1565	1900
	951.2	1045	1647
	875.2	721.8	3088
	1755	3290	3977
	1907	1232	1906
	958.6	1137	1721
	1260	945.4	8777
	1168	1997	2851
	1279	1567	4046
	1049	1103	2846
	1626	2417	2368
	1066	2322	2041
	1341	1665	2774
	925.7	1312	1009
	2113	3935	1372
	1953	1049	1778
	1110	1856	2047
	2655	1024	1776
	1647	738.1	2595
	1608	1587	3771
	1440	1700	3916
	2194	619.3	1773
	1288	1845	2658
	1096	3122	2057
Rep2	2298	1370	2439
	558.5	971.7	1803
	755.9	1394	2294
	618.6	853.2	2009
	1991	1402	1796
	2155	1536	1992
	1413	1476	2018
	1313	3081	1917
	809.7	1402	2606
	1069	1061	1747
	2653	809.3	1700
	749.4	1387	2108
	2584	2210	2660
	849.5	2179	1120
	1172	1078	2747
	1590	911.9	2687
	968	1915	2563
	914.7	1460	1823
	1778	1223	1573
	1148	1232	2130
	1784	1856	1860
	778.6	2029	1638
	1598	3210	1970
	941	1170	1802
	1078	3074	1736
Rep3	775.3	1951	1802
	777.6	1619	2897
	925.8	1060	1748
	1152	1679	3348
	937.9	1489	2055
	2359	1295	9360
	1370	1700	2796
	2359	2370	3116
		1197	4510
	876.6	1829	4519
	2395	841.9	3848
	866	1602	2926
	929.6	600.9	1687
	1129	1060	2898
	2347	1357	2788
	2218	2076	2295
	726.3	1039	2582
	782.8	1226	4068
		1340	2339
		1383	2460
		2999	1865
		1274	4780
		954.7	3616
			2229
			6385

## Sheet: I
	CTRL1	Cell Area	Fn Area	Fn Frac		MV+_1	Cell Area	Fn Area	Fn Frac		MV-_1	Cell Area	Fn Area	Fn Frac
		1225.66	153.99	0.125638			1296.02	68.397	0.0527748			2037.04	392.791	0.192824
		770.731	186.429	0.241886			1306.96	298.99	0.228768			1538.73	1262.4	0.820422
		1815.83	433.048	0.238485			876.648	238.802	0.272404			2001.09	505.743	0.252734
		1510.98	629.248	0.416451			1172.9	417.023	0.355548			1714.6	18.76	0.0109413
		1010.71	110.998	0.109822			882.901	23.45	0.0265602			999.371	42.601	0.0426278
		1015	112.561	0.110897			641.755	0	0			1116.62	284.529	0.254812
		1570.38	278.667	0.177452			1279.6	383.411	0.299633			1008.75	127.413	0.126308
		1077.15	158.289	0.146952			1823.26	82.076	0.0450162			1200.65	257.562	0.214518
		2396.61	911.823	0.380463			2231.68	19.933	0.00893184			2670.59	310.716	0.116347
		1561.39	219.65	0.140675			958.724	161.025	0.167958			988.427	24.623	0.0249113
		1349.95	5.863	0.00434312			1314.38	602.671	0.458519			1505.9	407.643	0.270698
		1226.45	16.415	0.0133842			862.578	189.947	0.220208			1450.79	576.485	0.39736
		1279.6	254.044	0.198534			1433.98	73.087	0.0509679			792.618	135.23	0.170612
		1140.46	720.313	0.631597			592.118	10.943	0.0184811			1532.47	617.132	0.402703
		830.92	347.454	0.418156			998.589	17.588	0.0176129			3379.96	1338.62	0.396045
		1356.2	127.413	0.0939482			1346.83	20.714	0.0153799			1683.73	544.827	0.323584
		2692.48	161.416	0.0599507			742.2	22.669	0.030543			2639.71	898.535	0.340391
		925.893	78.949	0.085268			1203.78	209.489	0.174026			755.488	211.052	0.279359
		1774.79	447.509	0.252147			1082.23	98.491	0.0910076			893.845	305.635	0.341933
		1375.75	481.511	0.35			1350.34	8.989	0.00665683			1986.23	224.341	0.112948
		2797.22	532.711	0.190443			1254.98	127.804	0.101838			968.104	560.07	0.578523
		1324.94	98.491	0.0743363								1775.18	869.613	0.489872
		539.746	21.496	0.0398261
		445.164	1.563	0.00351107
		481.121	118.033	0.245329
		938.009	350.581	0.37375
		1022.82	176.658	0.172716
		648.008	102.79	0.158625
	CTRL2	Cell Area	Fn Area	Fn Frac		MV+_2	Cell Area	Fn Area	Fn Frac		MV-_2	Cell Area	Fn Area	Fn Frac
		786.364	1.173	0.00149168			805.515	0.782	0.000970807			2108.96	491.282	0.23295
		1007.19	0	0			1181.5	25.404	0.0215015			1841.23	104.744	0.0568879
		625.339	125.068	0.2			467.441	26.968	0.0576928			1378.48	144.219	0.104622
		866.095	40.256	0.0464799			1344.87	4.299	0.00319659			2017.11	1162.35	0.576245
		748.062	193.074	0.258099			1376.53	39.475	0.0286772			1852.96	1267.88	0.684244
		731.256	41.038	0.0561199			1906.89	203.235	0.106579			590.946	59.016	0.099867
		893.845	28.922	0.0323568			1574.29	36.348	0.0230885			2109.74	447.899	0.212301
		1160.79	62.925	0.054209			1443.75	8.208	0.00568518			2309.07	947.78	0.41046
		1894.39	341.201	0.180111			1593.44	111.389	0.0699046			921.985	172.359	0.186943
		2005.78	448.681	0.223694			1419.13	317.36	0.22363			1029.46	553.816	0.537965
		777.766	161.416	0.207538			1362.85	45.728	0.0335532			3218.54	825.057	0.256345
		1815.83	130.93	0.0721048			674.976	61.752	0.0914877			1443.36	960.678	0.665584
		897.362	139.138	0.155052			722.658	50.418	0.0697674			5250.9	2261.38	0.430666
		1236.22	37.52	0.0303506			1420.69	47.291	0.0332873			1795.12	74.259	0.0413673
		813.723	7.817	0.00960646			1851.79	765.259	0.413254			894.235	125.068	0.13986
		643.318	101.227	0.157351			1674.35	916.122	0.547152			2245.75	29.313	0.0130527
		251.308	173.532	0.690515			1414.44	211.443	0.149489			2617.44	1049.79	0.401075
		477.212	94.973	0.199016			4447.34	166.887	0.0375252			3660.58	344.718	0.0941703
							3091.91	479.948	0.155227			4672.85	1763.07	0.3773
							691.391	44.555	0.0644426			1577.81	664.423	0.421105
							981.001	203.626	0.20757			1387.47	607.752	0.438028
							919.249	139.92	0.152211			1760.72	111.779	0.0634848
							966.931	140.311	0.14511			1999.52	997.807	0.499023
							1077.93	330.648	0.306744			560.461	243.492	0.434449
							1102.94	186.039	0.168675
							1271.78	484.638	0.381069
							1262.01	470.568	0.372871
							688.655	222.777	0.323496
							3048.53	998.589	0.327564
							1295.23	617.914	0.477067
							791.054	261.861	0.331028
							760.96	152.427	0.200309
	CTRL3	Cell Area	Fn Area	Fn Frac		MV+_3	Cell Area	Fn Area	Fn Frac		MV-_3	Cell Area	Fn Area	Fn Frac/Area
		425.622	14.461	0.0339762			1044.32	122.723	0.117515			1985.84	462.751	0.233025
		1387.47	519.813	0.374648			1301.49	305.244	0.234535			1822.08	672.631	0.369155
		1047.05	32.83	0.0313547			1946.76	217.305	0.111624			1948.71	741.418	0.380465
		1233.09	24.623	0.0199685			2570.93	377.94	0.147005			2456.41	961.85	0.391567
		737.51	188.774	0.255961			963.414	145.391	0.150912			378.721	21.496	0.0567595
		747.672	24.623	0.0329329			915.341	95.364	0.104184			2087.85	493.237	0.236241
		1080.66	57.844	0.0535263			408.816	7.035	0.0172082			1478.54	204.408	0.13825
		931.756	62.143	0.0666945			685.138	14.07	0.020536			976.311	292.737	0.29984
		940.745	80.512	0.0855832			883.292	77.386	0.0876109			2289.13	511.606	0.223493
		355.662	26.186	0.0736261			1337.05	68.006	0.0508626			1641.52	374.031	0.227857
		586.256	105.135	0.179333			1540.68	98.491	0.063927			2011.25	436.565	0.217062
		837.955	185.257	0.221082			1800.59	82.857	0.0460167			773.467	346.673	0.448207
		972.794	128.585	0.132181			922.767	55.108	0.0597204			1760.33	239.192	0.135879
		471.35	42.992	0.0912104								1402.71	209.098	0.149067
		560.851	134.448	0.239721								2466.57	171.578	0.0695613
		612.051	94.583	0.154535
		1203.78	230.985	0.191883
		571.404	51.591	0.0902881
		1030.25	285.311	0.276935
		1673.57	86.766	0.051845

## Sheet: J
replicate1
Ctrl1	EdU	DAPI		MV+_1	EdU	DAPI		MV-_1	EdU	DAPI
1	8	55		1	8	29		1	16	31
2	4	89		2	9	30		2	27	60
3	9	81		3	12	24		3	16	24
4	4	56		4	15	30		4	18	26
5	4	22		5	18	40		5	11	25
6	2	12		6	17	34		6	37	66
7	8	28		7	14	30		7	19	38
8	4	13		8	16	34		8	26	62
9	6	25		9	11	36		9	27	49
10	15	72		10	14	64		10	34	44
Total	64	453		Total	134	351		Total	231	425
%		14.128		%		38.1766		%		54.3529
replicate2
Ctrl2	EdU	DAPI		MV+_2	EdU	DAPI		MV-_2	EdU	DAPI
1	12	22		1	10	35		1	14	48
2	5	28		2	15	41		2	10	37
3	5	71		3	11	51		3	12	21
4	2	51		4	15	51		4	12	31
5	2	33		5	17	57		5	14	27
6	7	33		6	14	47		6	14	30
7	4	31		7	7	38		7	11	20
8	3	25		8	14	61		8	14	30
9	4	30		9	9	45		9	15	31
10	1	43		10	9	39		10	14	20
Total	45	367		Total	121	465		Total	130	295
%		12.2616		%		26.0215		%		44.0678
replicate3
Ctrl3	EdU	DAPI		MV+_3	EdU	DAPI		MV-_3	EdU	DAPI
1	6	53		1	20	60		1	36	94
2	3	52		2	17	36		2	27	66
3	5	66		3	24	60		3	37	85
4	3	35		4	20	71		4	53	128
5	8	58		5	26	94		5	55	157
6	7	41		6	28	95		6	50	93
7	3	70		7	25	105		7	42	89
8	5	45		8	23	102		8	38	84
9	5	45		9	18	72		9	35	87
10	2	43		10	15	67		10	26	75
Total	47	508		Total	216	762		Total	399	958
%		9.25197		%		28.3465		%		41.6493

## Sheet: K
	removed from analysis due to inadequate bead tracking
	Ctrl								MV+								MV-
CTRL1	Replicate 1								Replicate 1							NON1	Replicate 1
Cell #	m2	um2	N	nN	Pa	kPa		Cell #	m2	um2	N	nN	Pa	kPa		Cell #	m2	um2	N	nN	Pa	kPa
1	2.079e-09	2079	9.629e-07	962.9	463.155	0.463155		1	8.996e-10	899.6	5.442e-06	5442	6049.36	6.04936		1	1.986e-09	1986	5.153e-06	5153	2594.66	2.59466
2	1.448e-09	1448	5.675e-07	567.5	391.92	0.39192		2	7.115e-10	711.5	3.948e-07		554.884			2	2.112e-09	2112	2.595e-06		1228.69
3	1.028e-09	1028	1.171e-07	117.1	113.911	0.113911		3	6.763e-10	676.3	1.925e-07	192.5	284.637	0.284637		3	1.607e-09	1607	6.426e-06		3998.76
4	2.439e-09	2439	8.991e-07	899.1	368.635	0.368635		4	1.565e-09	1565	1.717e-06	1717	1097.12	1.09712		4	1.9e-09	1900	1.522e-06	1522	801.053	0.801053
5	9.512e-10	951.2	1.964e-07	196.4	206.476	0.206476		5	1.045e-09	1045	2.324e-06	2324	2223.92	2.22392		5	1.647e-09	1647	8.697e-07	869.7	528.051	0.528051
6	8.752e-10	875.2	2.87e-08	28.7	32.7925	0.0327925		6	7.218e-10	721.8	6.518e-07		903.02			6	3.088e-09	3088	5.608e-06	5608	1816.06	1.81606
7	1.755e-09	1755	4.401e-07	440.1	250.769	0.250769		7	3.29e-09	3290	4.332e-06	4332	1316.72	1.31672		7	3.977e-09	3977	3.947e-06	3947	992.457	0.992457
8	1.907e-09	1907	2.882e-06	2882	1511.27	1.51127		8	1.232e-09	1232	2.008e-06	2008	1629.87	1.62987		8	1.906e-09	1906	7.46e-06	7460	3913.96	3.91396
9	9.586e-10	958.6	7.436e-08	74.36	77.5715	0.0775715		9	1.137e-09	1137	7.554e-07	755.4	664.38	0.66438		9	1.721e-09	1721	2.118e-07	211.8	123.068	0.123068
10	1.26e-09	1260	7.503e-07	750.3	595.476	0.595476		10	9.454e-10	945.4	3.946e-07	394.6	417.389	0.417389		10	8.777e-09	8777	1.714e-05	17140	1952.83	1.95283
11	1.168e-09	1168	1.635e-06	1635	1399.83	1.39983		11	1.997e-09	1997	4.199e-06	4199	2102.65	2.10265		11	2.851e-09	2851	1.542e-05	15420	5408.63	5.40863
12	1.279e-09	1279	1.611e-06	1611	1259.58	1.25958		12	1.567e-09	1567	1.011e-06	1011	645.182	0.645182		12	4.046e-09	4046	4.184e-06	4184	1034.11	1.03411
13	1.049e-09	1049	4.473e-06		4264.06			13	1.103e-09	1103	3.856e-07		349.592			13	2.846e-09	2846	1.167e-06	1167	410.049	0.410049
14	1.626e-09	1626	6.77e-07	677	416.359	0.416359		14	2.417e-09	2417	5.346e-06	5346	2211.83	2.21183		14	2.368e-09	2368	5.502e-06	5502	2323.48	2.32348
15	1.066e-09	1066	5.142e-07	514.2	482.364	0.482364		15	2.322e-09	2322	4.616e-06	4616	1987.94	1.98794		15	2.041e-09	2041	6.083e-06	6083	2980.4	2.9804
16	1.341e-09	1341	5.153e-06	5153	3842.65	3.84265		16	1.665e-09	1665	3.094e-07	309.4	185.826	0.185826		16	2.774e-09	2774	3.028e-06	3028	1091.56	1.09156
17	9.257e-10	925.7	1.57e-06	1570	1696.01	1.69601		17	1.312e-09	1312	7.044e-07	704.4	536.89	0.53689		17	1.009e-09	1009	4.575e-07	457.5	453.419	0.453419
18	2.113e-09	2113	9.269e-07	926.9	438.665	0.438665		18	3.935e-09	3935	3.409e-06	3409	866.328	0.866328		18	1.372e-09	1372	5.05e-07	505	368.076	0.368076
19	1.953e-09	1953	2.734e-06		1399.9			19	1.049e-09	1049	8.691e-07	869.1	828.503	0.828503		19	1.778e-09	1778	2.569e-07	256.9	144.488	0.144488
20	1.11e-09	1110	9.559e-06		8611.71			20	1.856e-09	1856	4.061e-06	4061	2188.04	2.18804		20	2.047e-09	2047	2.031e-06	2031	992.184	0.992184
21	2.655e-09	2655	9.679e-06	9679	3645.57	3.64557		21	1.024e-09	1024	2.637e-07		257.52			21	1.776e-09	1776	1.098e-06	1098	618.243	0.618243
22	1.647e-09	1647	4.803e-06		2916.21			22	7.381e-10	738.1	1.218e-06	1218	1650.18	1.65018		22	2.595e-09	2595	3.998e-06	3998	1540.66	1.54066
23	1.608e-09	1608	4.922e-07	492.2	306.095	0.306095		23	1.587e-09	1587	5.863e-07		369.439			23	3.771e-09	3771	1.76e-06	1760	466.72	0.46672
24	1.44e-09	1440	9.077e-07	907.7	630.347	0.630347		24	1.7e-09	1700	3.322e-06	3322	1954.12	1.95412		24	3.916e-09	3916	4.171e-06	4171	1065.12	1.06512
25	2.194e-09	2194	8.764e-07	876.4	399.453	0.399453		25	6.193e-10	619.3	7.843e-08		126.643			25	1.773e-09	1773	1.071e-06	1071	604.061	0.604061
26	1.288e-09	1288	7.978e-07	797.8	619.41	0.61941		26	1.845e-09	1845	1.007e-05	10070	5457.99	5.45799		26	2.658e-09	2658	1.608e-07	160.8	60.4966	0.0604966
27	1.096e-09	1096	3.784e-07	378.4	345.255	0.345255		27	3.122e-09	3122	5.864e-06	5864	1878.28	1.87828		27	2.057e-09	2057	5.252e-06	5252	2553.23	2.55323
	Replicate 2								Replicate 2								Replicate 2
Cell #	m2	um2	N	nN	Pa	kPa		Cell #	m2	um2	N	nN	Pa	kPa		Cell #	m2	um2	N	nN	Pa	kPa
1	2.298e-09	2298	7.776e-06	7776	3383.81	3.38381		1	1.37e-09	1370	4.942e-07	494.2	360.73	0.36073		1	2.439e-09	2439	1.493e-05		6121.36
2	5.585e-10	558.5	3.8e-06		6803.94			2	9.717e-10	971.7	4.95e-07	495	509.416	0.509416		2	1.803e-09	1803	5.97e-06	5970	3311.15	3.31115
3	7.559e-10	755.9	5.117e-07	511.7	676.941	0.676941		3	1.394e-09	1394	7.923e-07	792.3	568.364	0.568364		3	2.294e-09	2294	1.212e-05	12120	5283.35	5.28335
4	6.186e-10	618.6	1.908e-07	190.8	308.438	0.308438		4	8.532e-10	853.2	7.749e-08	77.49	90.8228	0.0908228		4	2.009e-09	2009	2.377e-07		118.318
5	1.991e-09	1991	1.755e-06	1755	881.467	0.881467		5	1.402e-09	1402	1.57e-06	1570	1119.83	1.11983		5	1.796e-09	1796	1.944e-06		1082.41
6	2.155e-09	2155	3.479e-06	3479	1614.39	1.61439		6	1.536e-09	1536	2.756e-06	2756	1794.27	1.79427		6	1.992e-09	1992	1.445e-06	1445	725.402	0.725402
7	1.413e-09	1413	4.126e-06	4126	2920.03	2.92003		7	1.476e-09	1476	1.952e-06	1952	1322.49	1.32249		7	2.018e-09	2018	7.237e-07	723.7	358.622	0.358622
8	1.313e-09	1313	6.427e-07	642.7	489.49	0.48949		8	3.081e-09	3081	1.75e-06	1750	567.997	0.567997		8	1.917e-09	1917	1.01e-06	1010	526.865	0.526865
9	8.097e-10	809.7	6.515e-07		804.619			9	1.402e-09	1402	7.507e-07	750.7	535.449	0.535449		9	2.606e-09	2606	3.042e-06	3042	1167.31	1.16731
10	1.069e-09	1069	3.115e-06		2913.94			10	1.061e-09	1061	4.18e-07	418	393.968	0.393968		10	1.747e-09	1747	3.594e-07	359.4	205.724	0.205724
11	2.653e-09	2653	7.799e-06		2939.69			11	8.093e-10	809.3	4.14e-07	414	511.553	0.511553		11	1.7e-09	1700	5.77e-06		3394.12
12	7.494e-10	749.4	9.669e-07		1290.23			12	1.387e-09	1387	3.737e-07	373.7	269.43	0.26943		12	2.108e-09	2108	1.864e-05		8842.5
13	2.584e-09	2584	3.895e-06	3895	1507.35	1.50735		13	2.21e-09	2210	7.338e-07	733.8	332.036	0.332036		13	2.66e-09	2660	2.102e-06		790.226
14	8.495e-10	849.5	3.602e-07	360.2	424.014	0.424014		14	2.179e-09	2179	1.253e-06	1253	575.034	0.575034		14	1.12e-09	1120	6.668e-06		5953.57
15	1.172e-09	1172	1.07e-05		9129.69			15	1.078e-09	1078	1.424e-06	1424	1320.96	1.32096		15	2.747e-09	2747	1.434e-06		522.024
16	1.59e-09	1590	7.065e-06	7065	4443.4	4.4434		16	9.119e-10	911.9	2.719e-07	271.9	298.169	0.298169		16	2.687e-09	2687	4.292e-06	4292	1597.32	1.59732
17	9.68e-10	968	2.094e-06	2094	2163.22	2.16322		17	1.915e-09	1915	9.212e-07	921.2	481.044	0.481044		17	2.563e-09	2563	4.45e-06		1736.25
18	9.147e-10	914.7	1.703e-05		18618.1			18	1.46e-09	1460	3.619e-06	3619	2478.77	2.47877		18	1.823e-09	1823	2.194e-06	2194	1203.51	1.20351
19	1.778e-09	1778	8.535e-06	8535	4800.34	4.80034		19	1.223e-09	1223	1.16e-06	1160	948.487	0.948487		19	1.573e-09	1573	2.905e-06	2905	1846.79	1.84679
20	1.148e-09	1148	1.812e-05		15784			20	1.232e-09	1232	1.552e-06	1552	1259.74	1.25974		20	2.13e-09	2130	3.801e-06	3801	1784.51	1.78451
21	1.784e-09	1784	1.275e-05		7146.86			21	1.856e-09	1856	8.92e-06	8920	4806.03	4.80603		21	1.86e-09	1860	3.075e-06	3075	1653.23	1.65323
22	7.786e-10	778.6	3.054e-06		3922.42			22	2.029e-09	2029	8.43e-06	8430	4154.76	4.15476		22	1.638e-09	1638	7.783e-07	778.3	475.153	0.475153
23	1.598e-09	1598	3.793e-06		2373.59			23	3.21e-09	3210	2.128e-06	2128	662.928	0.662928		23	1.97e-09	1970	3.862e-06		1960.41
24	9.41e-10	941	4.905e-06		5212.54			24	1.17e-09	1170	5.131e-07	513.1	438.547	0.438547		24	1.802e-09	1802	3.904e-06	3904	2166.48	2.16648
25	1.078e-09	1078	8.147e-07	814.7	755.751	0.755751		25	3.074e-09	3074	3.323e-06	3323	1081	1.081		25	1.736e-09	1736	2.014e-06	2014	1160.14	1.16014
	Replicate 3								Replicate 3								Replicate 3
Cell #	m2	um2	N	nN	Pa	kPa		1	1.951e-09	1951	1.552e-06	1552	795.489	0.795489		Cell #	m2	um2	N	nN	Pa	kPa
1	7.753e-10	775.3	1.153e-06		1487.17			2	1.619e-09	1619	1.029e-06	1029	635.578	0.635578		1	1.802e-09	1802	1.72e-05	17200	9544.95	9.54495
2	7.776e-10	777.6	4.438e-07	443.8	570.73	0.57073		3	1.06e-09	1060	5.887e-07	588.7	555.377	0.555377		2	2.897e-09	2897	2.418e-06	2418	834.657	0.834657
3	9.258e-10	925.8	3.195e-07	319.5	345.107	0.345107		4	1.679e-09	1679	1.586e-06	1586	944.61	0.94461		3	1.748e-09	1748	4.89e-07		279.748
4	1.152e-09	1152	1.075e-06		933.16			5	1.489e-09	1489	9.157e-07	915.7	614.976	0.614976		4	3.348e-09	3348	1.209e-06		361.111
5	9.379e-10	937.9	3.996e-07	399.6	426.058	0.426058		6	1.295e-09	1295	4.184e-07	418.4	323.089	0.323089		5	2.055e-09	2055	2.305e-06	2305	1121.65	1.12165
6	2.359e-09	2359	2.574e-07	257.4	109.114	0.109114		7	1.7e-09	1700	6.111e-07	611.1	359.471	0.359471		6	9.36e-09	9360	1.835e-05	18350	1960.47	1.96047
7	1.37e-09	1370	5.96e-07	596	435.036	0.435036		8	2.37e-09	2370	2.227e-06	2227	939.662	0.939662		7	2.796e-09	2796	3.474e-08		12.4249
8	2.359e-09	2359	1.686e-06	1686	714.71	0.71471		9	1.197e-09	1197	1.519e-05		12690.1			8	3.116e-09	3116	7.636e-07	763.6	245.058	0.245058
9								10	1.829e-09	1829	2.215e-06	2215	1211.04	1.21104		9	4.51e-09	4510	1.602e-06	1602	355.211	0.355211
10	8.766e-10	876.6	2.043e-07		233.06			11	8.419e-10	841.9	5.937e-07	593.7	705.191	0.705191		10	4.519e-09	4519	1.747e-06	1747	386.59	0.38659
11	2.395e-09	2395	7.165e-07	716.5	299.165	0.299165		12	1.602e-09	1602	1.157e-06	1157	722.222	0.722222		11	3.848e-09	3848	1.547e-06	1547	402.027	0.402027
12	8.66e-10	866	1.729e-07		199.654			13	6.009e-10	600.9	1.792e-07		298.219			12	2.926e-09	2926	1.381e-06	1381	471.975	0.471975
13	9.296e-10	929.6	4.909e-07		528.077			14	1.06e-09	1060	9.26e-06		8735.85			13	1.687e-09	1687	4.595e-07	459.5	272.377	0.272377
14	1.129e-09	1129	6.33e-07		560.673			15	1.357e-09	1357	1.13e-06	1130	832.719	0.832719		14	2.898e-09	2898	1.407e-06	1407	485.507	0.485507
15	2.347e-09	2347	3.572e-06	3572	1521.94	1.52194		16	2.076e-09	2076	1.501e-06	1501	723.025	0.723025		15	2.788e-09	2788	1.339e-06	1339	480.273	0.480273
16	2.218e-09	2218	2.166e-06	2166	976.555	0.976555		17	1.039e-09	1039	1.451e-05		13965.4			16	2.295e-09	2295	7.892e-07	789.2	343.878	0.343878
17	7.263e-10	726.3	2.941e-07	294.1	404.929	0.404929		18	1.226e-09	1226	1.161e-05		9469.82			17	2.582e-09	2582	7.489e-06		2900.46
18	7.828e-10	782.8	4.894e-07	489.4	625.192	0.625192		19	1.34e-09	1340	7.796e-07		581.791			18	4.068e-09	4068	4.305e-06	4305	1058.26	1.05826
								20	1.383e-09	1383	5.434e-06	5434	3929.14	3.92914		19	2.339e-09	2339	2.478e-06	2478	1059.43	1.05943
								21	2.999e-09	2999	5.78e-06	5780	1927.31	1.92731		20	2.46e-09	2460	3.354e-06	3354	1363.41	1.36341
								22	1.274e-09	1274	4.05e-06		3178.96			21	1.865e-09	1865	2.388e-06	2388	1280.43	1.28043
								23	9.547e-10	954.7	9.991e-07		1046.51			22	4.78e-09	4780	5.952e-06	5952	1245.19	1.24519
																23	3.616e-09	3616	3.215e-06	3215	889.104	0.889104
																24	2.229e-09	2229	8.05e-06	8050	3611.48	3.61148
																25	6.385e-09	6385	3.218e-06	3218	503.994	0.503994

## Sheet: L
	Area Index at 48h
	MDA-	MDA-+3T3	MDA-+3T3+MV-	MDA-+3T3+MV+	MDA-+MV-
Rep1	0.777627	2.14617	3.59585	4.38491	0.483688
	0.382396	2.51716	2.92843	3.46347	0.696701
	0.954956	2.31381	5.48329	3.76348	0.730594
	0.779951	2.03612	2.81917	3.21798	0.86073
	1.05399	2.87242	5.20734	2.15324	1.09863
	0.80866	2.68408	6.89672	3.40186
	0.610317	2.45893	3.38555	4.66078
	1.12882	2.72883	3.95789	5.29667
				3.27522
				3.48922
Rep2	0.579895	1.41995	1.62318	2.29956	0.458925
	0.981761	0.905408	4.63195	3.64386	0.814243
	0.631613	1.4855	2.90652	2.80625	1.04337
	1.21837	0.651841	2.25621	3.33049	2.07946
	0.915068	1.61456	4.52457	3.70802	1.27508
	1.48988	1.49797	3.7356	3.5196	0.974789
		1.83106	4.79925
		1.51461	3.87613
Rep3	1.30679	2.89158	3.86027	2.86675	0.588148
	0.784497	3.25243	2.36237	3.71244	0.942702
	0.602529	2.80786	4.63845	2.62054	1.13725
	1.01985	1.142	3.32672	2.89212	1.1547
	0.604021	2.18305	3.12225	2.50093	1.15539
	0.671629	6.21416	8.70848	3.52243	1.05326
	0.886251	2.27361	4.77759		0.822063
	3.06696	2.23188	7.30256		0.646021
Rep4		4.56876	5.28319
		3.2585	4.04581
		2.548	4.27021
		1.73293	3.88727
		0.88376	3.87481
		3.67662	4.16251
		3.90182	4.85029
			3.41712

## Sheet: O
	Area Index at 48h
	MDA+	MDA++3T3	MDA+ +3T3 + MV+	MDA+ + 3T3 + MV-
Rep1	5.67462	12.1296	8.78741	9.1806
	7.08285	8.65179	6.51701	10.5438
	6.35237	7.40462	10.0864	9.88888
	6.28553	7.27192	6.92718	7.762
	5.28604	8.75371	14.1486	9.08792
	6.05608	7.41606	9.75363	10.875
	8.98988	8.89524		9.64788
	5.81468	8.82865		7.10112
Rep2	9.7164	4.7233	4.09786	17.2917
	8.0298	3.8989	4.69184	18.2839
	6.3177	2.32501	4.50829	21.4593
	7.3962	3.57541	5.45018	18.6453
	8.2551	4.74041	10.493	18.4187
	6.5539	4.75701	7.98705	14.2108
	9.28214	5.77255	9.02886	19.5518
	9.80173	7.05698	8.55046	19.183
	7.5613
	11.653
	7.3936
	11.011
Rep3	4.87059	11.063	13.4563	8.10748
	5.54783	11.2678	13.1254	7.7099
	9.0145	11.2651	13.6519	8.66024
	6.33629	10.629	12.2726	7.27245
	10.3782	12.2796	13.1679	7.39353
	7.99966	11.8695	14.722	4.3307
	7.83222	12.2462	10.7211	7.63735
	9.44153	12.3721	13.8441	5.77092
Rep4		13.3798	11.0737	9.36448
		16.857	18.2871	11.6808
		17.5762	19.7973	9.63614
		17.0513	15.5906	9.26291
		16.7586	13.1568
		15.3771	14.9257
		18.7405	22.148
		17.0468	19.8608
Rep5		4.63264	7.88368
		5.03179	7.96557
		7.28776	7.92121
		7.13668	9.65162
		11.405
		10.7867
		8.48877
		9.09184
Rep6		20.0517
		17.0962
		18.0653
		21.7095
		18.447
		19.4212
		20.6638
		14.0153
Rep7		7.28671
		5.52853
		7.79176
		6.48766
		4.72317
		4.68511
		5.48831
		6.08633
Rep8		8.46288
		9.85433
		8.95836
		9.07447
		18.6622
		19.3558
