# Supplementary material for: Weakly migratory metastatic breast cancer cells activate fibroblasts via microvesicle-Tg2 to facilitate dissemination and metastasis
Source: eLife journal article supplement (doi:10.7554/elife.74433), 2022-12-06
Supplement: supp [file Source Data Figure 3 - SuppFig1.xlsx]

## Sheet: A-D
See proteomics data associated with figure 3 for raw data
