# Supplementary material for: Weakly migratory metastatic breast cancer cells activate fibroblasts via microvesicle-Tg2 to facilitate dissemination and metastasis
Source: eLife journal article supplement (doi:10.7554/elife.74433), 2022-12-06
Supplement: supp [file Source Data Figure 3.xlsx]

## Sheet: ABC
numSpectra	numPepsUnique	log2_iTRAQ_117_115_median	Normalized Log 2	Fold Change	Z Score	P Value	Rank	BH Critical	Normalized Fold Change	iTRAQ_numRatios_117_115	species	accession_numbers	entry_name	log2 pvalue	inverse fold change
19	12	1.152	1.5559	2.22222	6.32489	1.2671e-10	2180	2.29253e-05	2.94017	19	HUMAN	Q92626	Peroxidasin homolog	-32.8778	0.340116			total proteins	2181	%
5	4	0.952	1.3559	1.93455	5.51254	1.76847e-08	2176	6.87758e-05	2.55957	5	HUMAN	P35625	Metalloproteinase inhibitor 3	-25.7529	0.390691			>1.1	585	26.8226
2	2	0.848	1.2519	1.8	5.09012	1.78921e-07	2171	0.000126089	2.38155	2	HUMAN	O60669	Monocarboxylate transporter 2	-22.4142	0.419895			<0.9	649	29.757
4	2	0.808	1.2119	1.75078	4.92765	4.16126e-07	2169	0.000149014	2.31643	4	HUMAN	P21926	CD9 antigen	-21.1965	0.4317			similar	947	43.4204
11	6	0.769	1.1729	1.70409	4.76924	9.24609e-07	2168	0.000160477	2.25464	11	HUMAN	P17301	Integrin alpha-2	-20.0447	0.443529
4	2	0.737	1.1409	1.66671	4.63926	1.74825e-06	2165	0.000194865	2.20519	4	HUMAN	Q96AP7	Endothelial cell-selective adhesion molecule	-19.1257	0.453477
5	3	0.71	1.1139	1.6358	4.5296	2.9548e-06	2163	0.00021779	2.1643	5	HUMAN	P04406	Glyceraldehyde-3-phosphate dehydrogenase	-18.3685	0.462043
3	3	0.708	1.1119	1.63354	4.52147	3.07052e-06	2162	0.000229253	2.1613	3	HUMAN	Q14517	Protocadherin Fat 1	-18.3131	0.462684
6	3	0.608	1.0119	1.52414	4.1153	1.93338e-05	2155	0.000309491	2.01657	6	HUMAN	P22692	Insulin-like growth factor-binding protein 4	-15.6585	0.495893
4	3	0.601	1.0049	1.51677	4.08687	2.18617e-05	2154	0.000320954	2.0068	4	HUMAN	P52566	Rho GDP-dissociation inhibitor 2	-15.4812	0.498305
14	8	0.484	0.8879	1.39862	3.61165	0.00015213	2146	0.000412655	1.85048	14	HUMAN	P56199	Integrin alpha-1	-12.6824	0.5404
6	4	0.477	0.8809	1.39185	3.58321	0.000169697	2145	0.000424117	1.84152	6	HUMAN	O14786	Neuropilin-1	-12.5248	0.543029
23	10	0.465	0.8689	1.38032	3.53447	0.000204295	2143	0.000447043	1.82627	23	HUMAN	P02751	Fibronectin	-12.2571	0.547564
2	2	0.443	0.8469	1.35943	3.44511	0.00028541	2140	0.000481431	1.79863	2	HUMAN	P27658	Collagen alpha-1(VIII) chain	-11.7747	0.555978
4	3	0.435	0.8389	1.35191	3.41262	0.000321708	2138	0.000504356	1.78869	4	HUMAN	P51648	Fatty aldehyde dehydrogenase	-11.602	0.55907
35	16	0.4	0.8039	1.31951	3.27046	0.000536866	2131	0.000584594	1.74581	35	HUMAN	P16144	Integrin beta-4	-10.8632	0.572799
3	2	0.396	0.7999	1.31585	3.25421	0.000568537	2128	0.000618982	1.74098	3	HUMAN	Q9H0H5|O60391	Rac GTPase-activating protein 1	-10.7805	0.574389
2	2	0.387	0.7909	1.30767	3.21766	0.000646213	2124	0.000664833	1.73015	2	HUMAN	Q8TC26	Transmembrane protein 163	-10.5957	0.577983
9	3	0.383	0.7869	1.30405	3.20141	0.000683785	2122	0.000687758	1.72536	9	HUMAN	P60903	Protein S100-A10	-10.5142	0.579588
5	3	0.36	0.7639	1.28343	3.10799	0.000941824	2115	0.000767996	1.69807	5	HUMAN	P19823	Inter-alpha-trypsin inhibitor heavy chain H2	-10.0523	0.588902
4	2	0.336	0.7399	1.26225	3.01051	0.00130406	2110	0.000825309	1.67006	4	HUMAN	P11169|Q8TDB8	Solute carrier family 2, facilitated glucose transporter member 3	-9.58278	0.598781
2	2	0.312	0.7159	1.24143	2.91303	0.00178972	2105	0.000882623	1.64251	2	HUMAN	P24557	Thromboxane-A synthase	-9.12605	0.608825
2	2	0.295	0.6989	1.22688	2.84398	0.00222772	2102	0.000917011	1.62327	2	HUMAN	Q16850	Lanosterol 14-alpha demethylase	-8.81022	0.616042
4	2	0.294	0.6979	1.22603	2.83991	0.00225628	2101	0.000928473	1.62214	4	HUMAN	Q9ULV4	Coronin-1C	-8.79184	0.616469
2	2	0.278	0.6819	1.21251	2.77493	0.00276071	2098	0.000962861	1.60425	2	HUMAN	O95864	Fatty acid desaturase 2	-8.50075	0.623344
2	2	0.266	0.6699	1.20247	2.72619	0.00320354	2093	0.00102017	1.59096	2	HUMAN	Q86XX4	Extracellular matrix protein FRAS1	-8.28612	0.62855
4	4	0.265	0.6689	1.20164	2.72212	0.00324319	2091	0.0010431	1.58986	4	HUMAN	Q96AC1	Fermitin family homolog 2	-8.26837	0.628986
7	2	0.255	0.6589	1.19334	2.68151	0.00366457	2088	0.00107749	1.57888	7	PIG	P00761	Trypsin	-8.09214	0.633361
2	2	0.25	0.6539	1.18921	2.6612	0.00389316	2083	0.0011348	1.57342	2	HUMAN	P0C0L4	Complement C4-A	-8.00484	0.63556
4	3	0.242	0.6459	1.18263	2.6287	0.00428554	2077	0.00120358	1.56472	4	HUMAN	Q8IYK4	Procollagen galactosyltransferase 2	-7.86631	0.639094
5	3	0.242	0.6459	1.18263	2.6287	0.00428554	2078	0.00119211	1.56472	5	HUMAN	O95466	Formin-like protein 1	-7.86631	0.639094
7	3	0.239	0.6429	1.18017	2.61652	0.00444157	2076	0.00121504	1.56146	7	HUMAN	P61225|Q9Y3L5|P10114	Ras-related protein Rap-2b	-7.81471	0.640424
5	2	0.235	0.6389	1.17691	2.60027	0.00465749	2072	0.00126089	1.55714	5	HUMAN	Q8IWT6	Leucine-rich repeat-containing protein 8A	-7.74623	0.642202
5	2	0.23	0.6339	1.17283	2.57996	0.00494054	2070	0.00128381	1.55175	5	HUMAN	O95084	Serine protease 23	-7.66112	0.644432
2	2	0.224	0.6279	1.16797	2.55559	0.00530035	2066	0.00132967	1.54531	2	HUMAN	Q96HC4	PDZ and LIM domain protein 5	-7.5597	0.647118
3	2	0.218	0.6219	1.16312	2.53122	0.00568328	2064	0.00135259	1.5389	3	HUMAN	Q8IZ81	ELMO domain-containing protein 2	-7.45906	0.649815
3	2	0.217	0.6209	1.16231	2.52716	0.00574944	2062	0.00137552	1.53783	3	HUMAN	Q9UKJ5	Cysteine-rich hydrophobic domain 2 protein	-7.44236	0.650265
5	2	0.211	0.6149	1.15749	2.50279	0.00616092	2060	0.00139844	1.53145	5	HUMAN	Q8NFJ5	Retinoic acid-induced protein 3	-7.34264	0.652975
7	4	0.205	0.6089	1.15269	2.47842	0.00659829	2056	0.00144429	1.5251	7	HUMAN	P29279	Connective tissue growth factor	-7.24369	0.655696
10	6	0.191	0.5949	1.14155	2.42156	0.00772712	2051	0.0015016	1.51037	10	HUMAN	P09104	Gamma-enolase	-7.01585	0.66209
20	10	0.187	0.5909	1.13839	2.40531	0.0080794	2047	0.00154746	1.50619	20	HUMAN	P29317	Ephrin type-A receptor 2	-6.95154	0.663929
3	2	0.183	0.5869	1.13524	2.38906	0.00844573	2045	0.00157038	1.50202	3	HUMAN	Q9UPT8	Zinc finger CCCH domain-containing protein 4	-6.88756	0.665772
3	2	0.169	0.5729	1.12428	2.3322	0.00984515	2035	0.00168501	1.48751	3	HUMAN	Q16513	Serine/threonine-protein kinase N2	-6.66637	0.672264
12	9	0.169	0.5729	1.12428	2.3322	0.00984515	2036	0.00167354	1.48751	12	HUMAN	Q9UHN6	Transmembrane protein 2	-6.66637	0.672264
3	3	0.167	0.5709	1.12272	2.32407	0.0100608	2034	0.00169647	1.48545	3	HUMAN	Q9BWD1	Acetyl-CoA acetyltransferase, cytosolic	-6.63512	0.673197
17	6	0.161	0.5649	1.11806	2.2997	0.0107325	2029	0.00175378	1.47928	17	HUMAN	P11310	Medium-chain specific acyl-CoA dehydrogenase, mitochondrial	-6.54187	0.676002
3	2	0.16	0.5639	1.11729	2.29564	0.0108482	2028	0.00176525	1.47826	3	HUMAN	P24821	Tenascin	-6.5264	0.676471
26	5	0.155	0.5589	1.11342	2.27533	0.011443	2027	0.00177671	1.47315	26	HUMAN	P21589	5'-nucleotidase	-6.44939	0.67882
22	8	0.149	0.5529	1.1088	2.25096	0.012194	2025	0.00179963	1.46703	22	HUMAN	Q58FF7	Putative heat shock protein HSP 90-beta-3	-6.35769	0.681649
10	4	0.148	0.5519	1.10803	2.2469	0.0123232	2023	0.00182256	1.46602	10	HUMAN	P23381	Tryptophan--tRNA ligase, cytoplasmic	-6.34248	0.682121
40	15	0.147	0.5509	1.10726	2.24284	0.0124536	2022	0.00183402	1.465	40	HUMAN	P52789	Hexokinase-2	-6.32729	0.682594
19	7	0.146	0.5499	1.1065	2.23878	0.0125852	2019	0.00186841	1.46398	19	HUMAN	O43854	EGF-like repeat and discoidin I-like domain-containing protein 3	-6.31213	0.683067
4	3	0.145	0.5489	1.10573	2.23472	0.012718	2017	0.00189133	1.46297	6	HUMAN	P54756|P54764|P29320	Ephrin type-A receptor 5	-6.29698	0.683541
6	4	0.138	0.5419	1.10038	2.20628	0.0136821	2012	0.00194865	1.45589	6	HUMAN	P29323	Ephrin type-B receptor 2	-6.19157	0.686866
2	2	0.136	0.5399	1.09885	2.19816	0.0139689	2008	0.0019945	1.45387	2	HUMAN	O00629	Importin subunit alpha-4	-6.16164	0.687819
8	3	0.136	0.5399	1.09885	2.19816	0.0139689	2009	0.00198304	1.45387	8	HUMAN	P14324	Farnesyl pyrophosphate synthase	-6.16164	0.687819
6	6	0.134	0.5379	1.09733	2.19004	0.0142608	2006	0.00201742	1.45186	6	HUMAN	Q08945	FACT complex subunit SSRP1	-6.1318	0.688773
15	9	0.134	0.5379	1.09733	2.19004	0.0142608	2007	0.00200596	1.45186	15	HUMAN	P50281	Matrix metalloproteinase-14	-6.1318	0.688773
6	3	0.129	0.5329	1.09354	2.16973	0.0150137	2003	0.00205181	1.44683	6	HUMAN	Q92747	Actin-related protein 2/3 complex subunit 1A	-6.05757	0.691164
5	4	0.128	0.5319	1.09278	2.16567	0.0151684	2000	0.0020862	1.44583	5	HUMAN	P43243	Matrin-3	-6.04279	0.691643
13	9	0.128	0.5319	1.09278	2.16567	0.0151684	2001	0.00207474	1.44583	13	HUMAN	Q9BZQ8	Protein Niban	-6.04279	0.691643
2	2	0.127	0.5309	1.09202	2.1616	0.0153243	1999	0.00209766	1.44483	2	HUMAN	Q9NRW7	Vacuolar protein sorting-associated protein 45	-6.02803	0.692123
4	3	0.124	0.5279	1.08975	2.14942	0.0158006	1995	0.00214351	1.44183	4	HUMAN	P51153	Ras-related protein Rab-13	-5.98388	0.693564
17	13	0.124	0.5279	1.08975	2.14942	0.0158006	1996	0.00213205	1.44183	17	HUMAN	O00159	Unconventional myosin-Ic	-5.98388	0.693564
3	2	0.123	0.5269	1.089	2.14536	0.0159621	1994	0.00215497	1.44083	3	HUMAN	P16220	Cyclic AMP-responsive element-binding protein 1	-5.9692	0.694044
2	2	0.12	0.5239	1.08673	2.13317	0.0164553	1989	0.00221229	1.43784	2	HUMAN	O43592	Exportin-T	-5.9253	0.695489
3	2	0.12	0.5239	1.08673	2.13317	0.0164553	1990	0.00220083	1.43784	3	HUMAN	Q8NFZ0	F-box only protein 18	-5.9253	0.695489
7	3	0.12	0.5239	1.08673	2.13317	0.0164553	1991	0.00218936	1.43784	7	HUMAN	P08648	Integrin alpha-5	-5.9253	0.695489
9	7	0.12	0.5239	1.08673	2.13317	0.0164553	1992	0.0021779	1.43784	9	HUMAN	P06737	Glycogen phosphorylase, liver form	-5.9253	0.695489
2	2	0.116	0.5199	1.08373	2.11693	0.0171331	1985	0.00225814	1.43386	2	HUMAN	O00505	Importin subunit alpha-3	-5.86707	0.69742
11	7	0.116	0.5199	1.08373	2.11693	0.0171331	1986	0.00224668	1.43386	11	HUMAN	P27708	CAD protein	-5.86707	0.69742
7	4	0.112	0.5159	1.08073	2.10068	0.0178346	1980	0.00231545	1.42989	7	HUMAN	Q9NS25|Q9BXN6|Q8TAD1|Q9NS26|Q9NY87	Sperm protein associated with the nucleus on the X chromosome B/F	-5.80918	0.699357
8	6	0.112	0.5159	1.08073	2.10068	0.0178346	1981	0.00230399	1.42989	8	HUMAN	Q5JWF2|P63092	Guanine nucleotide-binding protein G(s) subunit alpha isoforms XLas	-5.80918	0.699357
7	5	0.103	0.5069	1.074	2.06412	0.019503	1977	0.00234984	1.42099	7	HUMAN	O60701	UDP-glucose 6-dehydrogenase	-5.68016	0.703733
28	7	0.101	0.5049	1.07252	2.056	0.0198913	1972	0.00240715	1.41902	29	HUMAN	P07195|Q6ZMR3|P07864	L-lactate dehydrogenase B chain	-5.65172	0.704709
4	2	0.1	0.5039	1.07177	2.05194	0.0200879	1969	0.00244154	1.41804	4	HUMAN	P55060	Exportin-2	-5.63753	0.705198
5	4	0.099	0.5029	1.07103	2.04788	0.0202861	1967	0.00246447	1.41706	5	HUMAN	O95573	Long-chain-fatty-acid--CoA ligase 3	-5.62337	0.705687
70	13	0.097	0.5009	1.06955	2.03975	0.0206875	1966	0.00247593	1.4151	70	HUMAN	P08758	Annexin A5	-5.5951	0.706666
5	3	0.092	0.4959	1.06585	2.01944	0.0217206	1960	0.0025447	1.4102	5	HUMAN	Q9UI14	Prenylated Rab acceptor protein 1	-5.52479	0.709119
6	2	0.087	0.4909	1.06216	1.99913	0.0227969	1957	0.00257909	1.40532	6	HUMAN	Q9ULC3	Ras-related protein Rab-23	-5.45502	0.711581
3	2	0.082	0.4859	1.05848	1.97883	0.0239178	1952	0.00263641	1.40046	3	HUMAN	P62995	Transformer-2 protein homolog beta	-5.38577	0.714051
4	4	0.079	0.4829	1.05629	1.96664	0.0246123	1949	0.00267079	1.39755	4	HUMAN	P22413	Ectonucleotide pyrophosphatase/phosphodiesterase family member 1	-5.34448	0.715538
6	5	0.078	0.4819	1.05555	1.96258	0.0248475	1947	0.00269372	1.39658	6	HUMAN	Q92974	Rho guanine nucleotide exchange factor 2	-5.33075	0.716034
8	3	0.076	0.4799	1.05409	1.95446	0.0253237	1944	0.00272811	1.39465	8	HUMAN	P12268	Inosine-5'-monophosphate dehydrogenase 2	-5.30337	0.717027
17	3	0.075	0.4789	1.05336	1.95039	0.0255646	1943	0.00273957	1.39368	17	HUMAN	Q01650	Large neutral amino acids transporter small subunit 1	-5.28971	0.717525
3	3	0.074	0.4779	1.05263	1.94633	0.0258074	1940	0.00277396	1.39271	3	HUMAN	P50895	Basal cell adhesion molecule	-5.27607	0.718022
22	6	0.073	0.4769	1.0519	1.94227	0.0260522	1939	0.00278542	1.39175	22	HUMAN	Q08043	Alpha-actinin-3	-5.26245	0.71852
4	2	0.07	0.4739	1.04972	1.93009	0.0267981	1934	0.00284273	1.38886	4	HUMAN	P09497	Clathrin light chain B	-5.22172	0.720016
15	4	0.067	0.4709	1.04754	1.9179	0.0275618	1930	0.00288858	1.38597	15	HUMAN	Q15758	Neutral amino acid transporter B(0)	-5.18118	0.721514
34	22	0.066	0.4699	1.04681	1.91384	0.0278204	1927	0.00292297	1.38501	34	HUMAN	P78527	DNA-dependent protein kinase catalytic subunit	-5.16771	0.722015
6	2	0.065	0.4689	1.04608	1.90978	0.028081	1925	0.0029459	1.38405	6	HUMAN	Q9NPG3	Ubinuclein-1	-5.15426	0.722515
3	3	0.064	0.4679	1.04536	1.90571	0.0283436	1923	0.00296882	1.38309	3	HUMAN	Q02978	Mitochondrial 2-oxoglutarate/malate carrier protein	-5.14083	0.723016
155	22	0.062	0.4659	1.04391	1.89759	0.028875	1921	0.00299175	1.38118	155	BOVIN	P02769|P02768	Serum albumin	-5.11404	0.724019
3	3	0.061	0.4649	1.04319	1.89353	0.0291437	1917	0.0030376	1.38022	3	HUMAN	Q13190	Syntaxin-5	-5.10067	0.724521
15	7	0.061	0.4649	1.04319	1.89353	0.0291437	1918	0.00302613	1.38022	15	HUMAN	P26641	Elongation factor 1-gamma	-5.10067	0.724521
29	18	0.06	0.4639	1.04247	1.88947	0.0294146	1916	0.00304906	1.37927	29	HUMAN	P49327	Fatty acid synthase	-5.08732	0.725024
13	7	0.054	0.4579	1.03814	1.8651	0.0310839	1908	0.00314076	1.37354	13	HUMAN	P04899	Guanine nucleotide-binding protein G(i) subunit alpha-2	-5.00769	0.728045
20	14	0.05	0.4539	1.03526	1.84885	0.0322397	1903	0.00319807	1.36974	20	HUMAN	Q03001	Dystonin	-4.95502	0.730067
5	2	0.049	0.4529	1.03455	1.84479	0.0325341	1901	0.003221	1.36879	5	HUMAN	P63313	Thymosin beta-10	-4.9419	0.730573
4	3	0.049	0.4529	1.03455	1.84479	0.0325341	1902	0.00320954	1.36879	4	HUMAN	P28340	DNA polymerase delta catalytic subunit	-4.9419	0.730573
5	3	0.047	0.4509	1.03311	1.83667	0.0331297	1898	0.00325539	1.36689	5	HUMAN	P55809	Succinyl-CoA:3-ketoacid-coenzyme A transferase 1, mitochondrial	-4.91573	0.731586
2	2	0.045	0.4489	1.03168	1.82854	0.0337341	1895	0.00328978	1.365	2	HUMAN	P05166	Propionyl-CoA carboxylase beta chain, mitochondrial	-4.88965	0.732601
3	3	0.038	0.4419	1.02669	1.80011	0.0359217	1888	0.00337001	1.35839	3	HUMAN	P81605	Dermcidin	-4.799	0.736164
3	3	0.036	0.4399	1.02527	1.79199	0.0365676	1883	0.00342733	1.35651	3	HUMAN	Q02241	Kinesin-like protein KIF23	-4.77329	0.737186
3	2	0.035	0.4389	1.02456	1.78792	0.0368941	1880	0.00346171	1.35557	3	HUMAN	P49006	MARCKS-related protein	-4.76047	0.737697
2	2	0.034	0.4379	1.02385	1.78386	0.037223	1879	0.00347318	1.35463	2	HUMAN	O00422	Histone deacetylase complex subunit SAP18	-4.74766	0.738208
22	8	0.031	0.4349	1.02172	1.77168	0.0382241	1873	0.00354195	1.35182	22	HUMAN	P08195	4F2 cell-surface antigen heavy chain	-4.70938	0.739745
22	4	0.03	0.4339	1.02101	1.76762	0.0385626	1871	0.00356488	1.35088	22	HUMAN	P11166	Solute carrier family 2, facilitated glucose transporter member 1	-4.69665	0.740258
21	8	0.029	0.4329	1.0203	1.76355	0.0389035	1870	0.00357634	1.34994	21	HUMAN	P80723	Brain acid soluble protein 1	-4.68395	0.740771
4	2	0.028	0.4319	1.0196	1.75949	0.039247	1866	0.00362219	1.34901	4	HUMAN	O60306	Intron-binding protein aquarius	-4.67128	0.741285
22	5	0.027	0.4309	1.01889	1.75543	0.0395928	1865	0.00363365	1.34807	22	HUMAN	P01034	Cystatin-C	-4.65862	0.741799
24	6	0.024	0.4279	1.01677	1.74325	0.0406454	1863	0.00365658	1.34527	24	HUMAN	P00338	L-lactate dehydrogenase A chain	-4.62076	0.743343
2	2	0.022	0.4259	1.01537	1.73512	0.0413596	1862	0.00366804	1.34341	2	HUMAN	P02749	Beta-2-glycoprotein 1	-4.59563	0.744374
5	2	0.02	0.4239	1.01396	1.727	0.042084	1857	0.00372536	1.34155	5	HUMAN	P17096	High mobility group protein HMG-I/HMG-Y	-4.57059	0.745407
2	2	0.02	0.4239	1.01396	1.727	0.042084	1858	0.00371389	1.34155	2	HUMAN	Q15025	TNFAIP3-interacting protein 1	-4.57059	0.745407
4	3	0.02	0.4239	1.01396	1.727	0.042084	1859	0.00370243	1.34155	4	HUMAN	Q9UKS6	Protein kinase C and casein kinase substrate in neurons protein 3	-4.57059	0.745407
14	4	0.02	0.4239	1.01396	1.727	0.042084	1860	0.00369097	1.34155	14	HUMAN	Q9UBI6	Guanine nucleotide-binding protein G(I)/G(S)/G(O) subunit gamma-12	-4.57059	0.745407
26	14	0.019	0.4229	1.01326	1.72294	0.04245	1856	0.00373682	1.34062	26	HUMAN	P15311	Ezrin	-4.55809	0.745924
7	3	0.018	0.4219	1.01255	1.71887	0.0428186	1855	0.00374828	1.33969	7	HUMAN	O43175	D-3-phosphoglycerate dehydrogenase	-4.54562	0.746441
7	7	0.017	0.4209	1.01185	1.71481	0.0431897	1854	0.00375974	1.33876	7	HUMAN	Q8WWI1	LIM domain only protein 7	-4.53317	0.746959
2	2	0.016	0.4199	1.01115	1.71075	0.0435635	1850	0.00380559	1.33783	2	HUMAN	Q15417	Calponin-3	-4.52074	0.747476
6	5	0.016	0.4199	1.01115	1.71075	0.0435635	1851	0.00379413	1.33783	6	HUMAN	Q9BZG1	Ras-related protein Rab-34	-4.52074	0.747476
6	3	0.015	0.4189	1.01045	1.70669	0.0439399	1848	0.00382852	1.33691	6	HUMAN	Q9BVV7	Mitochondrial import inner membrane translocase subunit Tim21	-4.50833	0.747995
15	9	0.012	0.4159	1.00835	1.6945	0.0450847	1846	0.00385144	1.33413	15	HUMAN	P23229	Integrin alpha-6	-4.47122	0.749552
17	6	0.008	0.4119	1.00556	1.67826	0.0466484	1841	0.00390876	1.33044	17	HUMAN	Q58FF8	Putative heat shock protein HSP 90-beta 2	-4.42203	0.751633
7	3	0.006	0.4099	1.00417	1.67013	0.0474464	1837	0.00395461	1.32859	7	HUMAN	P16070	CD44 antigen	-4.39756	0.752676
8	5	0.006	0.4099	1.00417	1.67013	0.0474464	1838	0.00394315	1.32859	8	HUMAN	Q9H5V8	CUB domain-containing protein 1	-4.39756	0.752676
45	20	0.006	0.4099	1.00417	1.67013	0.0474464	1839	0.00393168	1.32859	45	HUMAN	P08133	Annexin A6	-4.39756	0.752676
4	2	0.005	0.4089	1.00347	1.66607	0.0478495	1834	0.003989	1.32767	4	HUMAN	Q92734	Protein TFG	-4.38535	0.753197
44	5	0.005	0.4089	1.00347	1.66607	0.0478495	1835	0.00397753	1.32767	44	HUMAN	P0CG48|P0CG47|P62979|P62987	Polyubiquitin-C	-4.38535	0.753197
3	2	0.003	0.4069	1.00208	1.65795	0.0486639	1831	0.00402338	1.32583	3	HUMAN	P01024	Complement C3	-4.361	0.754242
6	3	0.003	0.4069	1.00208	1.65795	0.0486639	1832	0.00401192	1.32583	6	HUMAN	O14744	Protein arginine N-methyltransferase 5	-4.361	0.754242
13	9	0.001	0.4049	1.00069	1.64983	0.0494893	1829	0.00404631	1.324	13	HUMAN	Q86VP6	Cullin-associated NEDD8-dissociated protein 1	-4.33674	0.755289
3	2	-0.003	0.4009	0.997923	1.63358	0.0511737	1822	0.00412655	1.32033	3	HUMAN	Q9NZW5	MAGUK p55 subfamily member 6	-4.28845	0.757386
12	6	-0.003	0.4009	0.997923	1.63358	0.0511737	1823	0.00411508	1.32033	12	HUMAN	P36871	Phosphoglucomutase-1	-4.28845	0.757386
8	4	-0.004	0.3999	0.997231	1.62952	0.0516018	1819	0.00416094	1.31942	8	HUMAN	P01116	GTPase KRas	-4.27643	0.757911
8	4	-0.006	0.3979	0.99585	1.62139	0.0524667	1817	0.00418386	1.31759	8	HUMAN	Q16666	Gamma-interferon-inducible protein 16	-4.25245	0.758962
21	16	-0.006	0.3979	0.99585	1.62139	0.0524667	1818	0.0041724	1.31759	21	HUMAN	Q86UP2	Kinectin	-4.25245	0.758962
78	19	-0.007	0.3969	0.99516	1.61733	0.0529034	1814	0.00421825	1.31668	81	HUMAN	P07900|Q58FF6|Q14568|Q58FG0	Heat shock protein HSP 90-alpha	-4.2405	0.759488
3	3	-0.008	0.3959	0.99447	1.61327	0.053343	1812	0.00424117	1.31576	3	HUMAN	Q9HB07	UPF0160 protein MYG1, mitochondrial	-4.22856	0.760015
2	2	-0.01	0.3939	0.993092	1.60515	0.0542308	1806	0.00430995	1.31394	2	HUMAN	Q53EU6	Glycerol-3-phosphate acyltransferase 3	-4.20474	0.761069
9	7	-0.01	0.3939	0.993092	1.60515	0.0542308	1807	0.00429849	1.31394	9	HUMAN	P49588	Alanine--tRNA ligase, cytoplasmic	-4.20474	0.761069
10	7	-0.011	0.3929	0.992404	1.60108	0.0546791	1803	0.00434434	1.31303	10	HUMAN	Q16643	Drebrin	-4.19287	0.761597
79	20	-0.011	0.3929	0.992404	1.60108	0.0546791	1804	0.00433287	1.31303	79	HUMAN	P12814|P35609	Alpha-actinin-1	-4.19287	0.761597
2	2	-0.013	0.3909	0.99103	1.59296	0.0555845	1799	0.00439019	1.31121	2	HUMAN	P06400	Retinoblastoma-associated protein	-4.16917	0.762654
5	4	-0.014	0.3899	0.990343	1.5889	0.0560416	1798	0.00440165	1.3103	5	HUMAN	Q01844	RNA-binding protein EWS	-4.15736	0.763183
24	7	-0.021	0.3829	0.985549	1.56047	0.0593248	1789	0.00450481	1.30396	24	HUMAN	P09651|Q32P51	Heterogeneous nuclear ribonucleoprotein A1	-4.07522	0.766894
14	8	-0.021	0.3829	0.985549	1.56047	0.0593248	1790	0.00449335	1.30396	14	HUMAN	Q96AE4	Far upstream element-binding protein 1	-4.07522	0.766894
13	9	-0.021	0.3829	0.985549	1.56047	0.0593248	1791	0.00448189	1.30396	13	HUMAN	Q9Y266	Nuclear migration protein nudC	-4.07522	0.766894
8	3	-0.023	0.3809	0.984184	1.55234	0.06029	1786	0.0045392	1.30215	8	HUMAN	O43143	Putative pre-mRNA-splicing factor ATP-dependent RNA helicase DHX15	-4.05194	0.767958
3	2	-0.024	0.3799	0.983502	1.54828	0.0607772	1784	0.00456213	1.30125	3	HUMAN	P67812	Signal peptidase complex catalytic subunit SEC11A	-4.04033	0.768491
7	6	-0.024	0.3799	0.983502	1.54828	0.0607772	1785	0.00455066	1.30125	7	HUMAN	P52272	Heterogeneous nuclear ribonucleoprotein M	-4.04033	0.768491
14	6	-0.025	0.3789	0.982821	1.54422	0.0612675	1782	0.00458505	1.30035	14	HUMAN	Q9UQ80	Proliferation-associated protein 2G4	-4.02873	0.769024
11	5	-0.026	0.3779	0.98214	1.54016	0.0617609	1781	0.00459652	1.29945	11	HUMAN	O15144	Actin-related protein 2/3 complex subunit 2	-4.01716	0.769557
23	7	-0.027	0.3769	0.981459	1.5361	0.0622573	1777	0.00464237	1.29855	23	HUMAN	P26006	Integrin alpha-3	-4.00561	0.770091
3	2	-0.029	0.3749	0.980099	1.52797	0.0632596	1774	0.00467675	1.29675	3	HUMAN	P63151	Serine/threonine-protein phosphatase 2A 55 kDa regulatory subunit B alpha isoform	-3.98257	0.771159
11	5	-0.03	0.3739	0.97942	1.52391	0.0637654	1772	0.00469968	1.29585	11	HUMAN	A0FGR8	Extended synaptotagmin-2	-3.97108	0.771694
7	5	-0.03	0.3739	0.97942	1.52391	0.0637654	1773	0.00468822	1.29585	7	HUMAN	Q8WXF1	Paraspeckle component 1	-3.97108	0.771694
20	4	-0.031	0.3729	0.978742	1.51985	0.0642744	1770	0.0047226	1.29495	20	HUMAN	P08174	Complement decay-accelerating factor	-3.95961	0.772229
13	9	-0.032	0.3719	0.978063	1.51579	0.0647865	1766	0.00476845	1.29406	13	HUMAN	Q9UQE7	Structural maintenance of chromosomes protein 3	-3.94816	0.772764
9	2	-0.034	0.3699	0.976709	1.50766	0.0658202	1763	0.00480284	1.29226	9	HUMAN	Q13501	Sequestosome-1	-3.92533	0.773836
2	2	-0.035	0.3689	0.976032	1.5036	0.0663418	1761	0.00482577	1.29137	2	HUMAN	Q96NB2	Sideroflexin-2	-3.91394	0.774373
3	2	-0.036	0.3679	0.975355	1.49954	0.0668667	1756	0.00488308	1.29047	3	HUMAN	Q16658	Fascin	-3.90257	0.77491
13	6	-0.036	0.3679	0.975355	1.49954	0.0668667	1757	0.00487162	1.29047	13	HUMAN	P00750	Tissue-type plasminogen activator	-3.90257	0.77491
40	12	-0.036	0.3679	0.975355	1.49954	0.0668667	1758	0.00486016	1.29047	40	HUMAN	P06733	Alpha-enolase	-3.90257	0.77491
2	2	-0.038	0.3659	0.974004	1.49142	0.067926	1754	0.00490601	1.28869	2	HUMAN	Q9Y673	Dolichyl-phosphate beta-glucosyltransferase	-3.87989	0.775985
5	3	-0.038	0.3659	0.974004	1.49142	0.067926	1755	0.00489454	1.28869	5	HUMAN	Q14739	Lamin-B receptor	-3.87989	0.775985
2	2	-0.04	0.3639	0.972655	1.48329	0.0689981	1748	0.00497478	1.2869	2	HUMAN	O76024	Wolframin	-3.8573	0.777061
52	23	-0.04	0.3639	0.972655	1.48329	0.0689981	1749	0.00496332	1.2869	52	HUMAN	P26038	Moesin	-3.8573	0.777061
124	24	-0.04	0.3639	0.972655	1.48329	0.0689981	1750	0.00495186	1.2869	124	HUMAN	O43707	Alpha-actinin-4	-3.8573	0.777061
5	3	-0.041	0.3629	0.971981	1.47923	0.0695391	1746	0.00499771	1.28601	5	HUMAN	Q16795	NADH dehydrogenase [ubiquinone] 1 alpha subcomplex subunit 9, mitochondrial	-3.84603	0.7776
6	5	-0.042	0.3619	0.971307	1.47517	0.0700833	1745	0.00500917	1.28512	6	HUMAN	P68366	Tubulin alpha-4A chain	-3.83478	0.778139
6	3	-0.043	0.3609	0.970634	1.47111	0.0706308	1740	0.00506648	1.28423	6	HUMAN	Q00839	Heterogeneous nuclear ribonucleoprotein U	-3.82356	0.778679
4	3	-0.043	0.3609	0.970634	1.47111	0.0706308	1741	0.00505502	1.28423	4	HUMAN	O00139	Kinesin-like protein KIF2A	-3.82356	0.778679
38	8	-0.043	0.3609	0.970634	1.47111	0.0706308	1742	0.00504356	1.28423	38	HUMAN	P05556	Integrin beta-1	-3.82356	0.778679
6	3	-0.044	0.3599	0.969962	1.46705	0.0711816	1739	0.00507795	1.28334	6	HUMAN	Q6PD62	RNA polymerase-associated protein CTR9 homolog	-3.81235	0.779219
5	3	-0.045	0.3589	0.96929	1.46299	0.0717357	1738	0.00508941	1.28245	5	HUMAN	P18085	ADP-ribosylation factor 4	-3.80117	0.779759
4	3	-0.046	0.3579	0.968618	1.45892	0.0722931	1735	0.0051238	1.28156	4	HUMAN	Q86VI3	Ras GTPase-activating-like protein IQGAP3	-3.79	0.7803
2	2	-0.047	0.3569	0.967947	1.45486	0.0728537	1733	0.00514672	1.28067	2	HUMAN	Q96SB3	Neurabin-2	-3.77885	0.780841
5	4	-0.047	0.3569	0.967947	1.45486	0.0728537	1734	0.00513526	1.28067	5	HUMAN	Q13740	CD166 antigen	-3.77885	0.780841
17	12	-0.051	0.3529	0.965267	1.43861	0.0751298	1729	0.00519257	1.27713	17	HUMAN	P11586	C-1-tetrahydrofolate synthase, cytoplasmic	-3.73447	0.783009
3	3	-0.053	0.3509	0.96393	1.43049	0.076288	1728	0.00520403	1.27536	3	HUMAN	Q86YQ8|Q9HCH3|Q8IYJ1	Copine-8	-3.7124	0.784095
3	2	-0.055	0.3489	0.962594	1.42237	0.0774597	1723	0.00526135	1.27359	3	HUMAN	O00161	Synaptosomal-associated protein 23	-3.69041	0.785183
2	2	-0.056	0.3479	0.961927	1.41831	0.0780507	1719	0.0053072	1.27271	2	HUMAN	Q8WWK9	Cytoskeleton-associated protein 2	-3.67944	0.785727
13	4	-0.056	0.3479	0.961927	1.41831	0.0780507	1720	0.00529574	1.27271	13	HUMAN	P52209	6-phosphogluconate dehydrogenase, decarboxylating	-3.67944	0.785727
4	3	-0.057	0.3469	0.961261	1.41424	0.0786451	1716	0.00534159	1.27182	4	HUMAN	Q14376	UDP-glucose 4-epimerase	-3.6685	0.786272
4	3	-0.058	0.3459	0.960595	1.41018	0.0792429	1715	0.00535305	1.27094	4	HUMAN	Q96CN9	GRIP and coiled-coil domain-containing protein 1	-3.65758	0.786817
3	2	-0.059	0.3449	0.959929	1.40612	0.0798441	1711	0.0053989	1.27006	3	HUMAN	P61020	Ras-related protein Rab-5B	-3.64667	0.787363
3	3	-0.059	0.3449	0.959929	1.40612	0.0798441	1712	0.00538744	1.27006	3	HUMAN	O75844	CAAX prenyl protease 1 homolog	-3.64667	0.787363
8	6	-0.059	0.3449	0.959929	1.40612	0.0798441	1713	0.00537597	1.27006	8	HUMAN	O00468	Agrin	-3.64667	0.787363
4	2	-0.06	0.3439	0.959264	1.40206	0.0804488	1708	0.00543329	1.26918	4	HUMAN	Q7L5N1	COP9 signalosome complex subunit 6	-3.63579	0.787908
8	3	-0.06	0.3439	0.959264	1.40206	0.0804488	1709	0.00542182	1.26918	8	HUMAN	O43169	Cytochrome b5 type B	-3.63579	0.787908
6	3	-0.064	0.3399	0.956608	1.38581	0.0829021	1701	0.00551353	1.26567	6	HUMAN	O75400	Pre-mRNA-processing factor 40 homolog A	-3.59245	0.790096
3	3	-0.064	0.3399	0.956608	1.38581	0.0829021	1702	0.00550206	1.26567	3	HUMAN	Q9BV38	WD repeat-containing protein 18	-3.59245	0.790096
9	5	-0.065	0.3389	0.955945	1.38175	0.0835241	1699	0.00553645	1.26479	9	HUMAN	P33527|O15438	Multidrug resistance-associated protein 1	-3.58166	0.790644
4	4	-0.068	0.3359	0.95396	1.36957	0.0854113	1690	0.00563961	1.26216	4	HUMAN	Q9Y6M1	Insulin-like growth factor 2 mRNA-binding protein 2	-3.54943	0.79229
8	5	-0.068	0.3359	0.95396	1.36957	0.0854113	1691	0.00562815	1.26216	8	HUMAN	O76094	Signal recognition particle 72 kDa protein	-3.54943	0.79229
6	5	-0.068	0.3359	0.95396	1.36957	0.0854113	1692	0.00561669	1.26216	6	HUMAN	Q01970	1-phosphatidylinositol 4,5-bisphosphate phosphodiesterase beta-3	-3.54943	0.79229
7	5	-0.069	0.3349	0.953299	1.3655	0.0860474	1688	0.00566254	1.26129	7	HUMAN	Q96RT1	Protein LAP2	-3.53872	0.792839
4	3	-0.071	0.3329	0.951978	1.35738	0.0873302	1682	0.00573132	1.25954	4	HUMAN	P63208	S-phase kinase-associated protein 1	-3.51738	0.793939
4	3	-0.071	0.3329	0.951978	1.35738	0.0873302	1683	0.00571985	1.25954	4	HUMAN	O60524	Nuclear export mediator factor NEMF	-3.51738	0.793939
21	12	-0.071	0.3329	0.951978	1.35738	0.0873302	1684	0.00570839	1.25954	21	HUMAN	P35527	Keratin, type I cytoskeletal 9	-3.51738	0.793939
15	10	-0.072	0.3319	0.951318	1.35332	0.087977	1681	0.00574278	1.25867	15	HUMAN	P26640	Valine--tRNA ligase	-3.50673	0.794489
4	3	-0.073	0.3309	0.950659	1.34926	0.0886273	1679	0.0057657	1.2578	4	HUMAN	P28288	ATP-binding cassette sub-family D member 3	-3.49611	0.79504
7	4	-0.073	0.3309	0.950659	1.34926	0.0886273	1680	0.00575424	1.2578	7	HUMAN	P17980	26S protease regulatory subunit 6A	-3.49611	0.79504
2	2	-0.074	0.3299	0.95	1.34519	0.0892811	1676	0.00580009	1.25693	2	HUMAN	P13726	Tissue factor	-3.4855	0.795592
40	9	-0.074	0.3299	0.95	1.34519	0.0892811	1677	0.00578863	1.25693	40	HUMAN	P08107|P34931|P17066|P48741	Heat shock 70 kDa protein 1A/1B	-3.4855	0.795592
3	2	-0.075	0.3289	0.949342	1.34113	0.0899386	1675	0.00581155	1.25606	3	HUMAN	Q9UMS4	Pre-mRNA-processing factor 19	-3.47492	0.796143
5	2	-0.076	0.3279	0.948684	1.33707	0.0905997	1671	0.0058574	1.25518	5	HUMAN	O14684	Prostaglandin E synthase	-3.46435	0.796695
3	2	-0.076	0.3279	0.948684	1.33707	0.0905997	1672	0.00584594	1.25518	3	HUMAN	Q96I25	Splicing factor 45	-3.46435	0.796695
4	3	-0.077	0.3269	0.948027	1.33301	0.0912643	1670	0.00586887	1.25432	4	HUMAN	P20339	Ras-related protein Rab-5A	-3.45381	0.797248
95	19	-0.078	0.3259	0.94737	1.32895	0.0919326	1666	0.00591472	1.25345	95	HUMAN	P08238	Heat shock protein HSP 90-beta	-3.44328	0.797801
90	32	-0.079	0.3249	0.946714	1.32489	0.0926044	1662	0.00596057	1.25258	90	HUMAN	P02545	Prelamin-A/C	-3.43277	0.798354
2	2	-0.08	0.3239	0.946058	1.32082	0.0932799	1660	0.00598349	1.25171	2	HUMAN	Q13151	Heterogeneous nuclear ribonucleoprotein A0	-3.42229	0.798907
20	6	-0.08	0.3239	0.946058	1.32082	0.0932799	1661	0.00597203	1.25171	20	HUMAN	Q5VTE0|P68104	Elongation factor 1-alpha 1	-3.42229	0.798907
10	9	-0.081	0.3229	0.945402	1.31676	0.0939591	1657	0.00601788	1.25084	10	HUMAN	Q9Y5B9	FACT complex subunit SPT16	-3.41182	0.799461
12	6	-0.082	0.3219	0.944747	1.3127	0.0946419	1654	0.00605227	1.24998	12	HUMAN	P12956	X-ray repair cross-complementing protein 6	-3.40138	0.800016
16	3	-0.083	0.3209	0.944092	1.30864	0.0953283	1653	0.00606373	1.24911	16	HUMAN	P06748	Nucleophosmin	-3.39095	0.80057
2	2	-0.085	0.3189	0.942785	1.30052	0.0967121	1651	0.00608666	1.24738	2	HUMAN	Q9UBU9	Nuclear RNA export factor 1	-3.37016	0.801681
2	2	-0.086	0.3179	0.942131	1.29645	0.0974095	1645	0.00615543	1.24651	2	HUMAN	O00622	Protein CYR61	-3.35979	0.802237
3	2	-0.086	0.3179	0.942131	1.29645	0.0974095	1646	0.00614397	1.24651	3	HUMAN	Q13523	Serine/threonine-protein kinase PRP4 homolog	-3.35979	0.802237
4	2	-0.09	0.3139	0.939523	1.28021	0.100236	1640	0.00621275	1.24306	4	HUMAN	Q6NUM9	All-trans-retinol 13,14-reductase	-3.31853	0.804464
2	2	-0.092	0.3119	0.938221	1.27208	0.101672	1635	0.00627006	1.24134	2	HUMAN	P53611	Geranylgeranyl transferase type-2 subunit beta	-3.29801	0.80558
2	2	-0.093	0.3109	0.937571	1.26802	0.102395	1631	0.00631591	1.24048	2	HUMAN	P40763	Signal transducer and activator of transcription 3	-3.28778	0.806139
5	3	-0.093	0.3109	0.937571	1.26802	0.102395	1632	0.00630445	1.24048	5	HUMAN	Q13547|Q92769	Histone deacetylase 1	-3.28778	0.806139
3	3	-0.093	0.3109	0.937571	1.26802	0.102395	1633	0.00629298	1.24048	3	HUMAN	Q15058	Kinesin-like protein KIF14	-3.28778	0.806139
6	3	-0.094	0.3099	0.936921	1.26396	0.103122	1626	0.00637322	1.23962	6	HUMAN	Q7L1Q6	Basic leucine zipper and W2 domain-containing protein 1	-3.27757	0.806698
13	7	-0.094	0.3099	0.936921	1.26396	0.103122	1627	0.00636176	1.23962	13	HUMAN	P17987	T-complex protein 1 subunit alpha	-3.27757	0.806698
6	4	-0.095	0.3089	0.936272	1.2599	0.103853	1623	0.00640761	1.23876	6	HUMAN	P17858	6-phosphofructokinase, liver type	-3.26739	0.807257
23	10	-0.095	0.3089	0.936272	1.2599	0.103853	1624	0.00639615	1.23876	23	HUMAN	P51659	Peroxisomal multifunctional enzyme type 2	-3.26739	0.807257
5	5	-0.096	0.3079	0.935623	1.25584	0.104588	1621	0.00643054	1.2379	5	HUMAN	O94906	Pre-mRNA-processing factor 6	-3.25722	0.807817
11	7	-0.096	0.3079	0.935623	1.25584	0.104588	1622	0.00641907	1.2379	11	HUMAN	P68363|Q71U36|Q9BQE3|Q13748|Q6PEY2|Q9NY65|A6NHL2	Tubulin alpha-1B chain	-3.25722	0.807817
3	2	-0.097	0.3069	0.934975	1.25177	0.105326	1617	0.00647639	1.23705	3	HUMAN	P40937	Replication factor C subunit 5	-3.24707	0.808377
7	3	-0.097	0.3069	0.934975	1.25177	0.105326	1618	0.00646492	1.23705	7	HUMAN	P35637|Q92804	RNA-binding protein FUS	-3.24707	0.808377
2	2	-0.099	0.3049	0.93368	1.24365	0.106814	1612	0.0065337	1.23533	2	HUMAN	P55011	Solute carrier family 12 member 2	-3.22683	0.809498
5	3	-0.1	0.3039	0.933033	1.23959	0.107564	1609	0.00656809	1.23448	5	HUMAN	Q3SXM5	Inactive hydroxysteroid dehydrogenase-like protein 1	-3.21674	0.81006
6	3	-0.101	0.3029	0.932386	1.23553	0.108317	1607	0.00659101	1.23362	6	HUMAN	Q5T4S7|Q14CS0	E3 ubiquitin-protein ligase UBR4	-3.20667	0.810621
2	2	-0.102	0.3019	0.93174	1.23147	0.109074	1605	0.00661394	1.23277	2	HUMAN	O15439	Multidrug resistance-associated protein 4	-3.19662	0.811183
147	41	-0.102	0.3019	0.93174	1.23147	0.109074	1606	0.00660248	1.23277	147	HUMAN	Q9NZM1	Myoferlin	-3.19662	0.811183
2	2	-0.103	0.3009	0.931095	1.2274	0.109835	1601	0.00665979	1.23191	2	HUMAN	Q13144	Translation initiation factor eIF-2B subunit epsilon	-3.18659	0.811746
5	4	-0.103	0.3009	0.931095	1.2274	0.109835	1602	0.00664833	1.23191	5	HUMAN	O15270	Serine palmitoyltransferase 2	-3.18659	0.811746
2	2	-0.104	0.2999	0.93045	1.22334	0.1106	1597	0.00670564	1.23106	2	HUMAN	P55265	Double-stranded RNA-specific adenosine deaminase	-3.17658	0.812309
5	4	-0.104	0.2999	0.93045	1.22334	0.1106	1598	0.00669418	1.23106	5	HUMAN	P13010	X-ray repair cross-complementing protein 5	-3.17658	0.812309
11	7	-0.105	0.2989	0.929805	1.21928	0.111369	1592	0.00676295	1.23021	11	HUMAN	O60264	SWI/SNF-related matrix-associated actin-dependent regulator of chromatin subfamily A member 5	-3.16658	0.812872
51	11	-0.105	0.2989	0.929805	1.21928	0.111369	1593	0.00675149	1.23021	51	HUMAN	P11142|P54652	Heat shock cognate 71 kDa protein	-3.16658	0.812872
6	4	-0.106	0.2979	0.929161	1.21522	0.112141	1587	0.00682027	1.22935	6	HUMAN	Q9NQW6	Actin-binding protein anillin	-3.15661	0.813436
2	2	-0.107	0.2969	0.928517	1.21116	0.112918	1583	0.00686612	1.2285	2	HUMAN	Q13636|Q9UL26	Ras-related protein Rab-31	-3.14666	0.814
7	3	-0.107	0.2969	0.928517	1.21116	0.112918	1584	0.00685465	1.2285	7	HUMAN	Q9UBQ5	Eukaryotic translation initiation factor 3 subunit K	-3.14666	0.814
3	3	-0.107	0.2969	0.928517	1.21116	0.112918	1585	0.00684319	1.2285	3	HUMAN	P24928	DNA-directed RNA polymerase II subunit RPB1	-3.14666	0.814
9	2	-0.108	0.2959	0.927873	1.2071	0.113698	1578	0.00692343	1.22765	9	HUMAN	Q96FQ6	Protein S100-A16	-3.13673	0.814564
16	10	-0.108	0.2959	0.927873	1.2071	0.113698	1579	0.00691197	1.22765	17	HUMAN	P33176|O60282|Q12840	Kinesin-1 heavy chain	-3.13673	0.814564
6	4	-0.109	0.2949	0.927231	1.20303	0.114482	1577	0.00693489	1.2268	6	HUMAN	Q02252	Methylmalonate-semialdehyde dehydrogenase [acylating], mitochondrial	-3.12681	0.815129
5	3	-0.11	0.2939	0.926588	1.19897	0.115269	1573	0.00698074	1.22595	5	HUMAN	P35659	Protein DEK	-3.11692	0.815694
4	2	-0.111	0.2929	0.925946	1.19491	0.116061	1570	0.00701513	1.2251	4	HUMAN	O95433	Activator of 90 kDa heat shock protein ATPase homolog 1	-3.10705	0.81626
3	3	-0.111	0.2929	0.925946	1.19491	0.116061	1571	0.00700367	1.2251	3	HUMAN	Q13637	Ras-related protein Rab-32	-3.10705	0.81626
2	2	-0.115	0.2889	0.923382	1.17866	0.119266	1555	0.00718707	1.22171	2	HUMAN	Q9Y4B6	Protein VPRBP	-3.06774	0.818526
12	3	-0.115	0.2889	0.923382	1.17866	0.119266	1556	0.00717561	1.22171	12	HUMAN	P02771	Alpha-fetoprotein	-3.06774	0.818526
7	4	-0.116	0.2879	0.922742	1.1746	0.120077	1552	0.00722146	1.22086	7	HUMAN	Q13200	26S proteasome non-ATPase regulatory subunit 2	-3.05797	0.819093
58	6	-0.116	0.2879	0.922742	1.1746	0.120077	1553	0.00721	1.22086	58	HUMAN	Q9BVA1|Q13885|P07437|A6NNZ2	Tubulin beta-2B chain	-3.05797	0.819093
3	2	-0.117	0.2869	0.922103	1.17054	0.120892	1548	0.00726731	1.22002	3	HUMAN	Q9HD23	Magnesium transporter MRS2 homolog, mitochondrial	-3.04821	0.819661
13	3	-0.117	0.2869	0.922103	1.17054	0.120892	1549	0.00725585	1.22002	13	HUMAN	P05026	Sodium/potassium-transporting ATPase subunit beta-1	-3.04821	0.819661
14	3	-0.117	0.2869	0.922103	1.17054	0.120892	1550	0.00724438	1.22002	14	HUMAN	Q16270	Insulin-like growth factor-binding protein 7	-3.04821	0.819661
3	3	-0.117	0.2869	0.922103	1.17054	0.120892	1551	0.00723292	1.22002	3	HUMAN	Q8WVM8	Sec1 family domain-containing protein 1	-3.04821	0.819661
2	2	-0.118	0.2859	0.921464	1.16648	0.121711	1546	0.00729023	1.21917	2	HUMAN	O75190|P25686|Q8NHS0	DnaJ homolog subfamily B member 6	-3.03847	0.82023
3	3	-0.118	0.2859	0.921464	1.16648	0.121711	1547	0.00727877	1.21917	3	HUMAN	O00203	AP-3 complex subunit beta-1	-3.03847	0.82023
2	2	-0.119	0.2849	0.920826	1.16242	0.122533	1539	0.00737047	1.21833	2	HUMAN	Q8IWC1	MAP7 domain-containing protein 3	-3.02876	0.820799
3	3	-0.119	0.2849	0.920826	1.16242	0.122533	1540	0.00735901	1.21833	3	HUMAN	Q9NVU7	Protein SDA1 homolog	-3.02876	0.820799
8	4	-0.119	0.2849	0.920826	1.16242	0.122533	1541	0.00734755	1.21833	8	HUMAN	P33121	Long-chain-fatty-acid--CoA ligase 1	-3.02876	0.820799
8	4	-0.119	0.2849	0.920826	1.16242	0.122533	1542	0.00733608	1.21833	8	HUMAN	P16949|Q93045	Stathmin	-3.02876	0.820799
2	2	-0.121	0.2829	0.91955	1.15429	0.12419	1533	0.00743925	1.21664	2	HUMAN	P53365	Arfaptin-2	-3.00938	0.821937
54	6	-0.121	0.2829	0.91955	1.15429	0.12419	1534	0.00742779	1.21664	54	HUMAN	P68371|Q3ZCM7|P04350	Tubulin beta-4B chain	-3.00938	0.821937
2	2	-0.122	0.2819	0.918913	1.15023	0.125024	1529	0.0074851	1.2158	2	HUMAN	P53355	Death-associated protein kinase 1	-2.99972	0.822507
2	2	-0.122	0.2819	0.918913	1.15023	0.125024	1530	0.00747364	1.2158	2	HUMAN	Q01780	Exosome component 10	-2.99972	0.822507
7	6	-0.122	0.2819	0.918913	1.15023	0.125024	1531	0.00746217	1.2158	7	HUMAN	Q5VT25	Serine/threonine-protein kinase MRCK alpha	-2.99972	0.822507
6	3	-0.124	0.2799	0.91764	1.14211	0.126705	1524	0.00754241	1.21411	6	HUMAN	P07910|O60812	Heterogeneous nuclear ribonucleoproteins C1/C2	-2.98046	0.823648
3	3	-0.124	0.2799	0.91764	1.14211	0.126705	1525	0.00753095	1.21411	3	HUMAN	Q96T37	Putative RNA-binding protein 15	-2.98046	0.823648
15	10	-0.124	0.2799	0.91764	1.14211	0.126705	1526	0.00751949	1.21411	15	HUMAN	P50990	T-complex protein 1 subunit theta	-2.98046	0.823648
4	3	-0.126	0.2779	0.916369	1.13398	0.128401	1519	0.00759972	1.21243	4	HUMAN	O15042	U2 snRNP-associated SURP motif-containing protein	-2.96128	0.824791
15	5	-0.126	0.2779	0.916369	1.13398	0.128401	1520	0.00758826	1.21243	15	HUMAN	Q92930	Ras-related protein Rab-8B	-2.96128	0.824791
3	3	-0.127	0.2769	0.915734	1.12992	0.129254	1517	0.00762265	1.21159	3	HUMAN	Q9H307	Pinin	-2.95172	0.825363
7	5	-0.127	0.2769	0.915734	1.12992	0.129254	1518	0.00761119	1.21159	7	HUMAN	P56545	C-terminal-binding protein 2	-2.95172	0.825363
11	4	-0.128	0.2759	0.915099	1.12586	0.130112	1515	0.00764558	1.21075	11	HUMAN	P40227|Q92526	T-complex protein 1 subunit zeta	-2.94217	0.825935
11	4	-0.129	0.2749	0.914465	1.1218	0.130974	1513	0.0076685	1.20991	11	HUMAN	Q16555	Dihydropyrimidinase-related protein 2	-2.93265	0.826508
2	2	-0.131	0.2729	0.913198	1.11368	0.132709	1507	0.00773728	1.20823	2	HUMAN	P40616	ADP-ribosylation factor-like protein 1	-2.91366	0.827654
4	2	-0.131	0.2729	0.913198	1.11368	0.132709	1508	0.00772581	1.20823	4	HUMAN	Q99720	Sigma non-opioid intracellular receptor 1	-2.91366	0.827654
2	2	-0.131	0.2729	0.913198	1.11368	0.132709	1509	0.00771435	1.20823	2	HUMAN	Q96MU7	YTH domain-containing protein 1	-2.91366	0.827654
4	4	-0.131	0.2729	0.913198	1.11368	0.132709	1510	0.00770289	1.20823	4	HUMAN	P23588	Eukaryotic translation initiation factor 4B	-2.91366	0.827654
13	6	-0.133	0.2709	0.911933	1.10555	0.13446	1502	0.00779459	1.20656	13	HUMAN	Q9BSJ8	Extended synaptotagmin-1	-2.89475	0.828802
19	13	-0.134	0.2699	0.911301	1.10149	0.135342	1500	0.00781751	1.20572	19	HUMAN	P46821	Microtubule-associated protein 1B	-2.88532	0.829377
18	7	-0.135	0.2689	0.91067	1.09743	0.136227	1497	0.0078519	1.20489	18	HUMAN	Q01813	6-phosphofructokinase type C	-2.87592	0.829952
30	10	-0.135	0.2689	0.91067	1.09743	0.136227	1498	0.00784044	1.20489	30	HUMAN	P78371	T-complex protein 1 subunit beta	-2.87592	0.829952
2	2	-0.136	0.2679	0.910039	1.09337	0.137116	1494	0.00788629	1.20405	2	HUMAN	Q7L9L4|Q9H8S9	MOB kinase activator 1B	-2.86653	0.830528
8	4	-0.136	0.2679	0.910039	1.09337	0.137116	1495	0.00787483	1.20405	8	HUMAN	Q15599	Na(+)/H(+) exchange regulatory cofactor NHE-RF2	-2.86653	0.830528
6	5	-0.136	0.2679	0.910039	1.09337	0.137116	1496	0.00786337	1.20405	6	HUMAN	Q12996	Cleavage stimulation factor subunit 3	-2.86653	0.830528
4	2	-0.137	0.2669	0.909408	1.08931	0.13801	1488	0.00795507	1.20322	4	HUMAN	O75964	ATP synthase subunit g, mitochondrial	-2.85716	0.831103
2	2	-0.137	0.2669	0.909408	1.08931	0.13801	1489	0.0079436	1.20322	2	HUMAN	Q9Y3E0	Vesicle transport protein GOT1B	-2.85716	0.831103
4	2	-0.137	0.2669	0.909408	1.08931	0.13801	1490	0.00793214	1.20322	4	HUMAN	Q9H4A6	Golgi phosphoprotein 3	-2.85716	0.831103
4	4	-0.137	0.2669	0.909408	1.08931	0.13801	1491	0.00792068	1.20322	4	HUMAN	Q14160	Protein scribble homolog	-2.85716	0.831103
15	8	-0.137	0.2669	0.909408	1.08931	0.13801	1492	0.00790922	1.20322	15	HUMAN	Q99832	T-complex protein 1 subunit eta	-2.85716	0.831103
2	2	-0.138	0.2659	0.908778	1.08524	0.138907	1485	0.00798945	1.20239	2	HUMAN	A6NDI0	Putative tripartite motif-containing protein 49B	-2.84781	0.83168
6	3	-0.138	0.2659	0.908778	1.08524	0.138907	1486	0.00797799	1.20239	6	HUMAN	P42766	60S ribosomal protein L35	-2.84781	0.83168
3	3	-0.139	0.2649	0.908148	1.08118	0.139808	1482	0.00802384	1.20155	3	HUMAN	P05165	Propionyl-CoA carboxylase alpha chain, mitochondrial	-2.83848	0.832256
7	5	-0.139	0.2649	0.908148	1.08118	0.139808	1483	0.00801238	1.20155	7	HUMAN	Q6P1J9	Parafibromin	-2.83848	0.832256
5	2	-0.14	0.2639	0.907519	1.07712	0.140713	1479	0.00805823	1.20072	5	HUMAN	Q13884	Beta-1-syntrophin	-2.82917	0.832833
2	2	-0.14	0.2639	0.907519	1.07712	0.140713	1480	0.00804677	1.20072	2	HUMAN	O15118	Niemann-Pick C1 protein	-2.82917	0.832833
3	3	-0.144	0.2599	0.905006	1.06087	0.144374	1465	0.00821871	1.1974	2	HUMAN	Q0ZGT2	Nexilin	-2.79212	0.835146
5	4	-0.144	0.2599	0.905006	1.06087	0.144374	1466	0.00820724	1.1974	5	HUMAN	Q9Y276	Mitochondrial chaperone BCS1	-2.79212	0.835146
4	4	-0.144	0.2599	0.905006	1.06087	0.144374	1467	0.00819578	1.1974	4	HUMAN	Q13363	C-terminal-binding protein 1	-2.79212	0.835146
23	15	-0.144	0.2599	0.905006	1.06087	0.144374	1468	0.00818432	1.1974	23	HUMAN	P20700	Lamin-B1	-2.79212	0.835146
11	6	-0.145	0.2589	0.904379	1.05681	0.145299	1460	0.00827602	1.19657	11	HUMAN	P49368	T-complex protein 1 subunit gamma	-2.78291	0.835725
13	6	-0.145	0.2589	0.904379	1.05681	0.145299	1461	0.00826456	1.19657	13	HUMAN	Q15233	Non-POU domain-containing octamer-binding protein	-2.78291	0.835725
5	5	-0.146	0.2579	0.903753	1.05275	0.146228	1457	0.00831041	1.19574	5	HUMAN	O14776	Transcription elongation regulator 1	-2.77371	0.836304
6	6	-0.146	0.2579	0.903753	1.05275	0.146228	1458	0.00829895	1.19574	7	HUMAN	P29992|O95837	Guanine nucleotide-binding protein subunit alpha-11	-2.77371	0.836304
6	4	-0.148	0.2559	0.902501	1.04463	0.148098	1449	0.00840211	1.19408	6	HUMAN	P30825	High affinity cationic amino acid transporter 1	-2.75538	0.837465
15	9	-0.148	0.2559	0.902501	1.04463	0.148098	1450	0.00839065	1.19408	15	HUMAN	P35221|P26232	Catenin alpha-1	-2.75538	0.837465
15	6	-0.149	0.2549	0.901875	1.04056	0.149039	1447	0.00842503	1.19325	15	HUMAN	P48643	T-complex protein 1 subunit epsilon	-2.74624	0.838045
4	3	-0.15	0.2539	0.90125	1.0365	0.149984	1445	0.00844796	1.19243	4	HUMAN	P29144	Tripeptidyl-peptidase 2	-2.73712	0.838626
4	3	-0.153	0.2509	0.899378	1.02432	0.152843	1438	0.0085282	1.18995	4	HUMAN	O94992	Protein HEXIM1	-2.70988	0.840372
3	2	-0.154	0.2499	0.898755	1.02026	0.153804	1433	0.00858551	1.18912	3	HUMAN	A0MZ66	Shootin-1	-2.70084	0.840955
11	5	-0.154	0.2499	0.898755	1.02026	0.153804	1434	0.00857405	1.18912	11	HUMAN	Q14444	Caprin-1	-2.70084	0.840955
7	5	-0.154	0.2499	0.898755	1.02026	0.153804	1435	0.00856259	1.18912	7	HUMAN	Q15643	Thyroid receptor-interacting protein 11	-2.70084	0.840955
3	3	-0.155	0.2489	0.898132	1.01619	0.154768	1429	0.00863136	1.1883	3	HUMAN	Q96KP1	Exocyst complex component 2	-2.69182	0.841538
27	8	-0.155	0.2489	0.898132	1.01619	0.154768	1430	0.0086199	1.1883	27	HUMAN	P04075	Fructose-bisphosphate aldolase A	-2.69182	0.841538
11	6	-0.157	0.2469	0.896888	1.00807	0.15671	1422	0.0087116	1.18665	11	HUMAN	O00391	Sulfhydryl oxidase 1	-2.67383	0.842705
3	2	-0.158	0.2459	0.896267	1.00401	0.157687	1416	0.00878038	1.18583	3	HUMAN	P23142	Fibulin-1	-2.66486	0.84329
2	2	-0.158	0.2459	0.896267	1.00401	0.157687	1417	0.00876891	1.18583	2	HUMAN	P55058	Phospholipid transfer protein	-2.66486	0.84329
5	3	-0.158	0.2459	0.896267	1.00401	0.157687	1418	0.00875745	1.18583	5	HUMAN	Q9Y696	Chloride intracellular channel protein 4	-2.66486	0.84329
4	4	-0.16	0.2439	0.895025	0.995885	0.159653	1410	0.00884915	1.18419	4	HUMAN	Q04446	1,4-alpha-glucan-branching enzyme	-2.64699	0.844459
6	5	-0.161	0.2429	0.894405	0.991824	0.160642	1406	0.008895	1.18337	6	HUMAN	P60842|Q14240	Eukaryotic initiation factor 4A-I	-2.63808	0.845045
7	6	-0.161	0.2429	0.894405	0.991824	0.160642	1407	0.00888354	1.18337	7	HUMAN	Q96N67	Dedicator of cytokinesis protein 7	-2.63808	0.845045
2	2	-0.162	0.2419	0.893785	0.987762	0.161635	1402	0.00894085	1.18255	2	HUMAN	Q68D91	Metallo-beta-lactamase domain-containing protein 2	-2.62919	0.845631
11	9	-0.162	0.2419	0.893785	0.987762	0.161635	1403	0.00892939	1.18255	11	HUMAN	P00533	Epidermal growth factor receptor	-2.62919	0.845631
6	3	-0.163	0.2409	0.893166	0.9837	0.162631	1400	0.00896378	1.18173	6	HUMAN	P24539	ATP synthase subunit b, mitochondrial	-2.62032	0.846217
19	10	-0.164	0.2399	0.892547	0.979639	0.163632	1397	0.00899817	1.18091	19	HUMAN	Q12913	Receptor-type tyrosine-protein phosphatase eta	-2.61147	0.846804
52	37	-0.164	0.2399	0.892547	0.979639	0.163632	1398	0.0089867	1.18091	52	HUMAN	Q14204	Cytoplasmic dynein 1 heavy chain 1	-2.61147	0.846804
3	2	-0.166	0.2379	0.89131	0.971515	0.165646	1391	0.00906694	1.17927	3	HUMAN	Q92973	Transportin-1	-2.59383	0.847979
2	2	-0.166	0.2379	0.89131	0.971515	0.165646	1392	0.00905548	1.17927	2	HUMAN	O75475	PC4 and SFRS1-interacting protein	-2.59383	0.847979
13	6	-0.166	0.2379	0.89131	0.971515	0.165646	1393	0.00904402	1.17927	13	HUMAN	O00232	26S proteasome non-ATPase regulatory subunit 12	-2.59383	0.847979
4	3	-0.167	0.2369	0.890693	0.967453	0.166659	1385	0.00913572	1.17846	4	HUMAN	O75116	Rho-associated protein kinase 2	-2.58503	0.848567
5	4	-0.167	0.2369	0.890693	0.967453	0.166659	1386	0.00912425	1.17846	5	HUMAN	Q9UM54	Unconventional myosin-VI	-2.58503	0.848567
8	6	-0.167	0.2369	0.890693	0.967453	0.166659	1387	0.00911279	1.17846	8	HUMAN	Q07866	Kinesin light chain 1	-2.58503	0.848567
108	26	-0.167	0.2369	0.890693	0.967453	0.166659	1388	0.00910133	1.17846	108	HUMAN	P08670|P17661|P41219|P12036|P07197|P07196|Q16352	Vimentin	-2.58503	0.848567
10	5	-0.169	0.2349	0.889459	0.95933	0.168696	1380	0.00919303	1.17683	10	HUMAN	P36542	ATP synthase subunit gamma, mitochondrial	-2.5675	0.849744
34	14	-0.169	0.2349	0.889459	0.95933	0.168696	1381	0.00918157	1.17683	34	HUMAN	P04083	Annexin A1	-2.5675	0.849744
3	2	-0.17	0.2339	0.888843	0.955268	0.169721	1370	0.00930766	1.17601	3	HUMAN	Q8N684	Cleavage and polyadenylation specificity factor subunit 7	-2.55876	0.850333
10	3	-0.17	0.2339	0.888843	0.955268	0.169721	1371	0.00929619	1.17601	10	HUMAN	Q86SQ0	Pleckstrin homology-like domain family B member 2	-2.55876	0.850333
6	4	-0.17	0.2339	0.888843	0.955268	0.169721	1372	0.00928473	1.17601	6	HUMAN	Q8N163	DBIRD complex subunit KIAA1967	-2.55876	0.850333
46	25	-0.17	0.2339	0.888843	0.955268	0.169721	1373	0.00927327	1.17601	46	HUMAN	P46940	Ras GTPase-activating-like protein IQGAP1	-2.55876	0.850333
2	2	-0.172	0.2319	0.887611	0.947145	0.171783	1364	0.00937643	1.17438	2	HUMAN	P30038	Delta-1-pyrroline-5-carboxylate dehydrogenase, mitochondrial	-2.54134	0.851513
2	2	-0.173	0.2309	0.886996	0.943083	0.172819	1359	0.00943375	1.17357	2	HUMAN	Q9NQ48	Leucine zipper transcription factor-like protein 1	-2.53266	0.852103
2	2	-0.174	0.2299	0.886382	0.939021	0.17386	1353	0.00950252	1.17275	2	HUMAN	Q9H078	Caseinolytic peptidase B protein homolog	-2.524	0.852694
3	2	-0.174	0.2299	0.886382	0.939021	0.17386	1354	0.00949106	1.17275	3	HUMAN	Q9BZE4	Nucleolar GTP-binding protein 1	-2.524	0.852694
7	7	-0.174	0.2299	0.886382	0.939021	0.17386	1355	0.0094796	1.17275	7	HUMAN	Q9NUQ9|Q9H0Q0	Protein FAM49B	-2.524	0.852694
14	10	-0.174	0.2299	0.886382	0.939021	0.17386	1356	0.00946813	1.17275	14	HUMAN	P46013	Antigen KI-67	-2.524	0.852694
11	2	-0.175	0.2289	0.885768	0.934959	0.174905	1350	0.00953691	1.17194	11	HUMAN	O00148|Q13838	ATP-dependent RNA helicase DDX39A	-2.51536	0.853285
9	7	-0.175	0.2289	0.885768	0.934959	0.174905	1351	0.00952545	1.17194	9	HUMAN	Q9P2J5	Leucine--tRNA ligase, cytoplasmic	-2.51536	0.853285
11	6	-0.176	0.2279	0.885154	0.930898	0.175953	1348	0.00955983	1.17113	11	HUMAN	Q8IVF2	Protein AHNAK2	-2.50674	0.853877
11	7	-0.178	0.2259	0.883928	0.922774	0.178062	1343	0.00961715	1.16951	11	HUMAN	O95757	Heat shock 70 kDa protein 4L	-2.48954	0.855061
17	11	-0.178	0.2259	0.883928	0.922774	0.178062	1344	0.00960569	1.16951	17	HUMAN	P20020|Q01814|Q16720	Plasma membrane calcium-transporting ATPase 1	-2.48954	0.855061
2	2	-0.179	0.2249	0.883315	0.918712	0.179123	1341	0.00964007	1.1687	2	HUMAN	Q92569	Phosphatidylinositol 3-kinase regulatory subunit gamma	-2.48098	0.855654
16	6	-0.179	0.2249	0.883315	0.918712	0.179123	1342	0.00962861	1.1687	16	HUMAN	P62834|P61224|A6NIZ1	Ras-related protein Rap-1A	-2.48098	0.855654
5	3	-0.18	0.2239	0.882703	0.914651	0.180188	1339	0.009663	1.16789	5	HUMAN	Q9H3U1	Protein unc-45 homolog A	-2.47243	0.856248
5	3	-0.181	0.2229	0.882091	0.910589	0.181256	1333	0.00973177	1.16708	5	HUMAN	Q9BUJ2	Heterogeneous nuclear ribonucleoprotein U-like protein 1	-2.4639	0.856841
3	3	-0.181	0.2229	0.882091	0.910589	0.181256	1334	0.00972031	1.16708	3	HUMAN	Q9BTC0	Death-inducer obliterator 1	-2.4639	0.856841
4	4	-0.182	0.2219	0.88148	0.906527	0.182328	1330	0.00976616	1.16627	4	HUMAN	O14578	Citron Rho-interacting kinase	-2.45539	0.857435
8	4	-0.183	0.2209	0.880869	0.902465	0.183405	1326	0.00981201	1.16546	8	HUMAN	Q06323	Proteasome activator complex subunit 1	-2.4469	0.85803
4	4	-0.183	0.2209	0.880869	0.902465	0.183405	1327	0.00980055	1.16546	4	HUMAN	Q14203	Dynactin subunit 1	-2.4469	0.85803
5	5	-0.183	0.2209	0.880869	0.902465	0.183405	1328	0.00978909	1.16546	5	HUMAN	P78344	Eukaryotic translation initiation factor 4 gamma 2	-2.4469	0.85803
4	4	-0.184	0.2199	0.880259	0.898404	0.184485	1322	0.00985786	1.16465	4	HUMAN	Q92696	Geranylgeranyl transferase type-2 subunit alpha	-2.43842	0.858625
6	4	-0.185	0.2189	0.879649	0.894342	0.185569	1316	0.00992664	1.16385	6	HUMAN	P49589	Cysteine--tRNA ligase, cytoplasmic	-2.42997	0.85922
11	6	-0.186	0.2179	0.87904	0.89028	0.186658	1311	0.00998395	1.16304	11	HUMAN	Q06210	Glucosamine--fructose-6-phosphate aminotransferase [isomerizing] 1	-2.42153	0.859816
8	8	-0.186	0.2179	0.87904	0.89028	0.186658	1312	0.00997249	1.16304	8	HUMAN	P11388	DNA topoisomerase 2-alpha	-2.42153	0.859816
7	2	-0.187	0.2169	0.87843	0.886219	0.18775	1306	0.0100413	1.16223	7	HUMAN	O00299	Chloride intracellular channel protein 1	-2.41312	0.860412
10	3	-0.187	0.2169	0.87843	0.886219	0.18775	1307	0.0100298	1.16223	10	HUMAN	P62316	Small nuclear ribonucleoprotein Sm D2	-2.41312	0.860412
3	3	-0.187	0.2169	0.87843	0.886219	0.18775	1308	0.0100183	1.16223	3	HUMAN	P26196	Probable ATP-dependent RNA helicase DDX6	-2.41312	0.860412
26	17	-0.187	0.2169	0.87843	0.886219	0.18775	1309	0.0100069	1.16223	26	HUMAN	Q03252	Lamin-B2	-2.41312	0.860412
4	2	-0.188	0.2159	0.877822	0.882157	0.188846	1304	0.0100642	1.16143	4	HUMAN	Q8NB16	Mixed lineage kinase domain-like protein	-2.40472	0.861009
8	7	-0.188	0.2159	0.877822	0.882157	0.188846	1305	0.0100527	1.16143	8	HUMAN	Q16706	Alpha-mannosidase 2	-2.40472	0.861009
2	2	-0.189	0.2149	0.877214	0.878095	0.189946	1296	0.0101559	1.16062	2	HUMAN	Q6NUK4	Receptor expression-enhancing protein 3	-2.39634	0.861606
7	4	-0.189	0.2149	0.877214	0.878095	0.189946	1297	0.0101444	1.16062	7	HUMAN	P61619|Q9H9S3|Q9C0F3	Protein transport protein Sec61 subunit alpha isoform 1	-2.39634	0.861606
11	5	-0.19	0.2139	0.876606	0.874033	0.19105	1292	0.0102017	1.15982	11	HUMAN	Q9Y262	Eukaryotic translation initiation factor 3 subunit L	-2.38798	0.862203
5	5	-0.19	0.2139	0.876606	0.874033	0.19105	1293	0.0101903	1.15982	5	HUMAN	P35249	Replication factor C subunit 4	-2.38798	0.862203
2	2	-0.191	0.2129	0.875998	0.869972	0.192158	1289	0.0102361	1.15902	2	HUMAN	P61201	COP9 signalosome complex subunit 2	-2.37964	0.862801
5	2	-0.192	0.2119	0.875391	0.86591	0.19327	1283	0.0103049	1.15821	5	HUMAN	Q8IX12	Cell division cycle and apoptosis regulator protein 1	-2.37131	0.863399
4	3	-0.192	0.2119	0.875391	0.86591	0.19327	1284	0.0102934	1.15821	4	HUMAN	Q9Y2Z4	Tyrosine--tRNA ligase, mitochondrial	-2.37131	0.863399
10	3	-0.192	0.2119	0.875391	0.86591	0.19327	1285	0.010282	1.15821	10	HUMAN	Q6DD88	Atlastin-3	-2.37131	0.863399
31	16	-0.192	0.2119	0.875391	0.86591	0.19327	1286	0.0102705	1.15821	31	HUMAN	P53396	ATP-citrate synthase	-2.37131	0.863399
2	2	-0.193	0.2109	0.874785	0.861848	0.194386	1281	0.0103278	1.15741	2	HUMAN	P57088	Transmembrane protein 33	-2.36301	0.863998
3	3	-0.193	0.2109	0.874785	0.861848	0.194386	1282	0.0103164	1.15741	3	HUMAN	O00425	Insulin-like growth factor 2 mRNA-binding protein 3	-2.36301	0.863998
6	3	-0.194	0.2099	0.874179	0.857786	0.195505	1275	0.0103966	1.15661	6	HUMAN	Q99653	Calcium-binding protein p22	-2.35472	0.864597
4	3	-0.194	0.2099	0.874179	0.857786	0.195505	1276	0.0103851	1.15661	4	HUMAN	Q8TCT9	Minor histocompatibility antigen H13	-2.35472	0.864597
11	2	-0.195	0.2089	0.873573	0.853725	0.196629	1270	0.0104539	1.15581	11	HUMAN	Q15836	Vesicle-associated membrane protein 3	-2.34645	0.865197
7	2	-0.195	0.2089	0.873573	0.853725	0.196629	1271	0.0104425	1.15581	7	HUMAN	P63027	Vesicle-associated membrane protein 2	-2.34645	0.865197
8	3	-0.195	0.2089	0.873573	0.853725	0.196629	1272	0.010431	1.15581	8	HUMAN	Q9Y617	Phosphoserine aminotransferase	-2.34645	0.865197
13	5	-0.196	0.2079	0.872968	0.849663	0.197756	1268	0.0104768	1.15501	13	HUMAN	P09972	Fructose-bisphosphate aldolase C	-2.3382	0.865797
3	3	-0.197	0.2069	0.872363	0.845601	0.198888	1264	0.0105227	1.15421	3	HUMAN	Q96PD2	Discoidin, CUB and LCCL domain-containing protein 2	-2.32997	0.866397
9	5	-0.197	0.2069	0.872363	0.845601	0.198888	1265	0.0105112	1.15421	9	HUMAN	P31946	14-3-3 protein beta/alpha	-2.32997	0.866397
11	7	-0.197	0.2069	0.872363	0.845601	0.198888	1266	0.0104998	1.15421	11	HUMAN	Q9UNH7	Sorting nexin-6	-2.32997	0.866397
3	2	-0.198	0.2059	0.871758	0.841539	0.200023	1257	0.0106029	1.15341	3	HUMAN	P42574	Caspase-3	-2.32176	0.866998
5	2	-0.198	0.2059	0.871758	0.841539	0.200023	1258	0.0105915	1.15341	5	HUMAN	O95989	Diphosphoinositol polyphosphate phosphohydrolase 1	-2.32176	0.866998
3	2	-0.198	0.2059	0.871758	0.841539	0.200023	1259	0.01058	1.15341	3	HUMAN	O95747	Serine/threonine-protein kinase OSR1	-2.32176	0.866998
3	3	-0.198	0.2059	0.871758	0.841539	0.200023	1260	0.0105685	1.15341	3	HUMAN	Q5SRE7	Phytanoyl-CoA dioxygenase domain-containing protein 1	-2.32176	0.866998
6	5	-0.198	0.2059	0.871758	0.841539	0.200023	1261	0.0105571	1.15341	6	HUMAN	O60716	Catenin delta-1	-2.32176	0.866998
2	2	-0.199	0.2049	0.871154	0.837478	0.201162	1254	0.0106373	1.15261	2	HUMAN	O94985	Calsyntenin-1	-2.31357	0.867599
3	3	-0.199	0.2049	0.871154	0.837478	0.201162	1255	0.0106259	1.15261	3	HUMAN	P39748	Flap endonuclease 1	-2.31357	0.867599
2	2	-0.2	0.2039	0.870551	0.833416	0.202305	1248	0.0107061	1.15181	2	HUMAN	Q8N7H5	RNA polymerase II-associated factor 1 homolog	-2.3054	0.8682
5	2	-0.201	0.2029	0.869947	0.829354	0.203452	1240	0.0107978	1.15101	5	HUMAN	Q9NSD9	Phenylalanine--tRNA ligase beta subunit	-2.29724	0.868802
2	2	-0.201	0.2029	0.869947	0.829354	0.203452	1241	0.0107863	1.15101	2	HUMAN	Q99594	Transcriptional enhancer factor TEF-5	-2.29724	0.868802
9	4	-0.201	0.2029	0.869947	0.829354	0.203452	1242	0.0107749	1.15101	9	HUMAN	Q9UNE7	E3 ubiquitin-protein ligase CHIP	-2.29724	0.868802
6	5	-0.201	0.2029	0.869947	0.829354	0.203452	1243	0.0107634	1.15101	6	HUMAN	Q8WWY3	U4/U6 small nuclear ribonucleoprotein Prp31	-2.29724	0.868802
10	5	-0.201	0.2029	0.869947	0.829354	0.203452	1244	0.0107519	1.15101	10	HUMAN	Q15008	26S proteasome non-ATPase regulatory subunit 6	-2.29724	0.868802
16	7	-0.201	0.2029	0.869947	0.829354	0.203452	1245	0.0107405	1.15101	16	HUMAN	P17655	Calpain-2 catalytic subunit	-2.29724	0.868802
10	7	-0.201	0.2029	0.869947	0.829354	0.203452	1246	0.010729	1.15101	10	HUMAN	P08621	U1 small nuclear ribonucleoprotein 70 kDa	-2.29724	0.868802
5	2	-0.202	0.2019	0.869345	0.825292	0.204603	1236	0.0108436	1.15021	5	HUMAN	Q12792	Twinfilin-1	-2.2891	0.869405
7	4	-0.202	0.2019	0.869345	0.825292	0.204603	1237	0.0108322	1.15021	7	HUMAN	Q07812	Apoptosis regulator BAX	-2.2891	0.869405
6	3	-0.203	0.2009	0.868742	0.821231	0.205757	1229	0.0109239	1.14942	6	HUMAN	P35813	Protein phosphatase 1A	-2.28098	0.870008
4	3	-0.203	0.2009	0.868742	0.821231	0.205757	1230	0.0109124	1.14942	4	HUMAN	Q9Y487	V-type proton ATPase 116 kDa subunit a isoform 2	-2.28098	0.870008
9	4	-0.203	0.2009	0.868742	0.821231	0.205757	1231	0.010901	1.14942	9	HUMAN	Q8WVX9	Fatty acyl-CoA reductase 1	-2.28098	0.870008
9	4	-0.203	0.2009	0.868742	0.821231	0.205757	1232	0.0108895	1.14942	9	HUMAN	P31942	Heterogeneous nuclear ribonucleoprotein H3	-2.28098	0.870008
4	4	-0.203	0.2009	0.868742	0.821231	0.205757	1233	0.010878	1.14942	4	HUMAN	P23458	Tyrosine-protein kinase JAK1	-2.28098	0.870008
2	2	-0.205	0.1989	0.867539	0.813107	0.208078	1219	0.0110385	1.14782	2	HUMAN	Q8IY81	Putative rRNA methyltransferase 3	-2.2648	0.871215
4	3	-0.205	0.1989	0.867539	0.813107	0.208078	1220	0.0110271	1.14782	4	HUMAN	P26358	DNA (cytosine-5)-methyltransferase 1	-2.2648	0.871215
17	7	-0.205	0.1989	0.867539	0.813107	0.208078	1221	0.0110156	1.14782	17	HUMAN	P23246	Splicing factor, proline- and glutamine-rich	-2.2648	0.871215
4	2	-0.208	0.1959	0.865737	0.800922	0.211588	1211	0.0111302	1.14544	4	HUMAN	Q9UBX3	Mitochondrial dicarboxylate carrier	-2.24067	0.873028
7	4	-0.208	0.1959	0.865737	0.800922	0.211588	1212	0.0111188	1.14544	7	HUMAN	P18859	ATP synthase-coupling factor 6, mitochondrial	-2.24067	0.873028
3	2	-0.21	0.1939	0.864537	0.792799	0.213948	1203	0.0112219	1.14385	3	HUMAN	P13804	Electron transfer flavoprotein subunit alpha, mitochondrial	-2.22467	0.874239
5	2	-0.21	0.1939	0.864537	0.792799	0.213948	1204	0.0112105	1.14385	5	HUMAN	P31939	Bifunctional purine biosynthesis protein PURH	-2.22467	0.874239
5	4	-0.21	0.1939	0.864537	0.792799	0.213948	1205	0.011199	1.14385	5	HUMAN	Q99584	Protein S100-A13	-2.22467	0.874239
4	2	-0.211	0.1929	0.863938	0.788737	0.215133	1201	0.0112448	1.14306	4	HUMAN	Q13595	Transformer-2 protein homolog alpha	-2.2167	0.874845
7	2	-0.212	0.1919	0.86334	0.784675	0.216322	1197	0.0112907	1.14227	7	HUMAN	P49721	Proteasome subunit beta type-2	-2.20875	0.875452
4	3	-0.212	0.1919	0.86334	0.784675	0.216322	1198	0.0112792	1.14227	4	HUMAN	P27695	DNA-(apurinic or apyrimidinic site) lyase	-2.20875	0.875452
10	3	-0.213	0.1909	0.862741	0.780613	0.217515	1192	0.011348	1.14148	10	HUMAN	Q9NZ01	Trans-2,3-enoyl-CoA reductase	-2.20081	0.876059
3	3	-0.214	0.1899	0.862144	0.776552	0.218712	1187	0.0114053	1.14068	3	HUMAN	P40222	Alpha-taxilin	-2.1929	0.876666
16	8	-0.214	0.1899	0.862144	0.776552	0.218712	1188	0.0113939	1.14068	16	HUMAN	Q9Y230	RuvB-like 2	-2.1929	0.876666
3	3	-0.215	0.1889	0.861546	0.77249	0.219912	1183	0.0114512	1.13989	3	HUMAN	Q9ULF5	Zinc transporter ZIP10	-2.185	0.877274
16	7	-0.215	0.1889	0.861546	0.77249	0.219912	1184	0.0114397	1.13989	16	HUMAN	Q14344	Guanine nucleotide-binding protein subunit alpha-13	-2.185	0.877274
3	2	-0.216	0.1879	0.860949	0.768428	0.221116	1181	0.0114741	1.1391	3	HUMAN	Q8NFW8	N-acylneuraminate cytidylyltransferase	-2.17712	0.877883
9	3	-0.217	0.1869	0.860353	0.764366	0.222324	1177	0.0115199	1.13832	9	HUMAN	O75947	ATP synthase subunit d, mitochondrial	-2.16926	0.878491
13	7	-0.217	0.1869	0.860353	0.764366	0.222324	1178	0.0115085	1.13832	14	HUMAN	P31943|P55795	Heterogeneous nuclear ribonucleoprotein H	-2.16926	0.878491
4	2	-0.218	0.1859	0.859756	0.760305	0.223536	1171	0.0115887	1.13753	4	HUMAN	O43395	U4/U6 small nuclear ribonucleoprotein Prp3	-2.16142	0.8791
2	2	-0.218	0.1859	0.859756	0.760305	0.223536	1172	0.0115773	1.13753	2	HUMAN	Q8N8Q8	Mitochondrial inner membrane protein COX18	-2.16142	0.8791
12	3	-0.218	0.1859	0.859756	0.760305	0.223536	1173	0.0115658	1.13753	12	HUMAN	P63000	Ras-related C3 botulinum toxin substrate 1	-2.16142	0.8791
3	3	-0.218	0.1859	0.859756	0.760305	0.223536	1174	0.0115543	1.13753	3	HUMAN	O94776	Metastasis-associated protein MTA2	-2.16142	0.8791
12	8	-0.218	0.1859	0.859756	0.760305	0.223536	1175	0.0115429	1.13753	12	HUMAN	P35241	Radixin	-2.16142	0.8791
7	2	-0.221	0.1829	0.857971	0.748119	0.227194	1164	0.011669	1.13516	7	HUMAN	P14406	Cytochrome c oxidase subunit 7A2, mitochondrial	-2.138	0.88093
9	3	-0.222	0.1819	0.857376	0.744058	0.228421	1160	0.0117148	1.13438	9	HUMAN	Q9Y5M8	Signal recognition particle receptor subunit beta	-2.13023	0.881541
9	4	-0.222	0.1819	0.857376	0.744058	0.228421	1161	0.0117033	1.13438	9	HUMAN	P42126	Enoyl-CoA delta isomerase 1, mitochondrial	-2.13023	0.881541
6	3	-0.223	0.1809	0.856782	0.739996	0.229651	1158	0.0117377	1.13359	6	HUMAN	Q13425	Beta-2-syntrophin	-2.12248	0.882153
4	2	-0.224	0.1799	0.856188	0.735934	0.230885	1154	0.0117836	1.13281	4	HUMAN	P08581	Hepatocyte growth factor receptor	-2.11475	0.882764
25	8	-0.224	0.1799	0.856188	0.735934	0.230885	1155	0.0117721	1.13281	25	HUMAN	Q01518	Adenylyl cyclase-associated protein 1	-2.11475	0.882764
9	2	-0.225	0.1789	0.855595	0.731872	0.232123	1149	0.0118409	1.13202	9	HUMAN	P08240	Signal recognition particle receptor subunit alpha	-2.10704	0.883376
2	2	-0.225	0.1789	0.855595	0.731872	0.232123	1150	0.0118294	1.13202	2	HUMAN	Q9UNN5	FAS-associated factor 1	-2.10704	0.883376
4	4	-0.225	0.1789	0.855595	0.731872	0.232123	1151	0.011818	1.13202	4	HUMAN	Q9HCS7	Pre-mRNA-splicing factor SYF1	-2.10704	0.883376
10	5	-0.225	0.1789	0.855595	0.731872	0.232123	1152	0.0118065	1.13202	10	HUMAN	O14745	Na(+)/H(+) exchange regulatory cofactor NHE-RF1	-2.10704	0.883376
3	2	-0.226	0.1779	0.855002	0.727811	0.233365	1141	0.0119326	1.13124	3	HUMAN	O43670	Zinc finger protein 207	-2.09934	0.883989
4	4	-0.226	0.1779	0.855002	0.727811	0.233365	1142	0.0119211	1.13124	4	HUMAN	Q08752	Peptidyl-prolyl cis-trans isomerase D	-2.09934	0.883989
7	6	-0.226	0.1779	0.855002	0.727811	0.233365	1143	0.0119097	1.13124	7	HUMAN	O14950|P19105|P24844	Myosin regulatory light chain 12B	-2.09934	0.883989
15	10	-0.226	0.1779	0.855002	0.727811	0.233365	1144	0.0118982	1.13124	15	HUMAN	Q9UIW2|P51805	Plexin-A1	-2.09934	0.883989
2	2	-0.227	0.1769	0.85441	0.723749	0.23461	1135	0.0120014	1.13045	2	HUMAN	Q9NV70	Exocyst complex component 1	-2.09166	0.884602
2	2	-0.227	0.1769	0.85441	0.723749	0.23461	1136	0.0119899	1.13045	2	HUMAN	Q9P2K8	Eukaryotic translation initiation factor 2-alpha kinase 4	-2.09166	0.884602
4	3	-0.227	0.1769	0.85441	0.723749	0.23461	1137	0.0119785	1.13045	4	HUMAN	P42285	Superkiller viralicidic activity 2-like 2	-2.09166	0.884602
3	3	-0.227	0.1769	0.85441	0.723749	0.23461	1138	0.011967	1.13045	3	HUMAN	Q0JRZ9	FCH domain only protein 2	-2.09166	0.884602
11	4	-0.227	0.1769	0.85441	0.723749	0.23461	1139	0.0119555	1.13045	11	HUMAN	P22087|A6NHQ2	rRNA 2'-O-methyltransferase fibrillarin	-2.09166	0.884602
6	4	-0.228	0.1759	0.853818	0.719687	0.235859	1134	0.0120128	1.12967	6	HUMAN	Q6UVK1	Chondroitin sulfate proteoglycan 4	-2.084	0.885215
3	2	-0.229	0.1749	0.853226	0.715626	0.237111	1130	0.0120587	1.12889	3	HUMAN	Q6P1M0	Long-chain fatty acid transport protein 4	-2.07636	0.885829
8	3	-0.229	0.1749	0.853226	0.715626	0.237111	1131	0.0120472	1.12889	8	HUMAN	P52888	Thimet oligopeptidase	-2.07636	0.885829
7	3	-0.229	0.1749	0.853226	0.715626	0.237111	1132	0.0120358	1.12889	7	HUMAN	O14964	Hepatocyte growth factor-regulated tyrosine kinase substrate	-2.07636	0.885829
4	2	-0.23	0.1739	0.852635	0.711564	0.238367	1128	0.0120816	1.1281	4	HUMAN	O75494|Q8WXF0	Serine/arginine-rich splicing factor 10	-2.06874	0.886443
3	3	-0.23	0.1739	0.852635	0.711564	0.238367	1129	0.0120702	1.1281	3	HUMAN	P51798	H(+)/Cl(-) exchange transporter 7	-2.06874	0.886443
3	2	-0.231	0.1729	0.852044	0.707502	0.239627	1117	0.0122077	1.12732	3	HUMAN	Q14699	Raftlin	-2.06114	0.887058
7	2	-0.231	0.1729	0.852044	0.707502	0.239627	1118	0.0121962	1.12732	7	HUMAN	Q8N3R9	MAGUK p55 subfamily member 5	-2.06114	0.887058
4	2	-0.231	0.1729	0.852044	0.707502	0.239627	1119	0.0121848	1.12732	4	HUMAN	P17931	Galectin-3	-2.06114	0.887058
7	2	-0.231	0.1729	0.852044	0.707502	0.239627	1120	0.0121733	1.12732	7	HUMAN	O15078	Centrosomal protein of 290 kDa	-2.06114	0.887058
7	2	-0.231	0.1729	0.852044	0.707502	0.239627	1121	0.0121619	1.12732	7	HUMAN	Q6L8Q7	2',5'-phosphodiesterase 12	-2.06114	0.887058
7	2	-0.231	0.1729	0.852044	0.707502	0.239627	1122	0.0121504	1.12732	7	HUMAN	Q86TU7	Histone-lysine N-methyltransferase setd3	-2.06114	0.887058
7	2	-0.231	0.1729	0.852044	0.707502	0.239627	1123	0.0121389	1.12732	7	HUMAN	O75879	Glutamyl-tRNA(Gln) amidotransferase subunit B, mitochondrial	-2.06114	0.887058
10	8	-0.231	0.1729	0.852044	0.707502	0.239627	1124	0.0121275	1.12732	10	HUMAN	P09543	2',3'-cyclic-nucleotide 3'-phosphodiesterase	-2.06114	0.887058
8	3	-0.232	0.1719	0.851454	0.70344	0.240891	1113	0.0122536	1.12654	8	HUMAN	Q9H6T3	RNA polymerase II-associated protein 3	-2.05355	0.887673
11	8	-0.232	0.1719	0.851454	0.70344	0.240891	1114	0.0122421	1.12654	11	HUMAN	Q92945	Far upstream element-binding protein 2	-2.05355	0.887673
49	12	-0.233	0.1709	0.850864	0.699379	0.242158	1108	0.0123109	1.12576	49	HUMAN	P14618|P30613	Pyruvate kinase isozymes M1/M2	-2.04598	0.888288
2	2	-0.234	0.1699	0.850274	0.695317	0.243428	1101	0.0123911	1.12498	2	HUMAN	P45984	Mitogen-activated protein kinase 9	-2.03843	0.888904
3	2	-0.234	0.1699	0.850274	0.695317	0.243428	1102	0.0123796	1.12498	3	HUMAN	Q9NRY6	Phospholipid scramblase 3	-2.03843	0.888904
2	2	-0.234	0.1699	0.850274	0.695317	0.243428	1103	0.0123682	1.12498	2	HUMAN	Q9P2W9	Syntaxin-18	-2.03843	0.888904
5	3	-0.234	0.1699	0.850274	0.695317	0.243428	1104	0.0123567	1.12498	5	HUMAN	Q6Y7W6	PERQ amino acid-rich with GYF domain-containing protein 2	-2.03843	0.888904
6	6	-0.234	0.1699	0.850274	0.695317	0.243428	1105	0.0123453	1.12498	6	HUMAN	Q8NF91	Nesprin-1	-2.03843	0.888904
2	2	-0.235	0.1689	0.849685	0.691255	0.244703	1096	0.0124484	1.1242	2	HUMAN	Q15526	Surfeit locus protein 1	-2.0309	0.889521
4	3	-0.235	0.1689	0.849685	0.691255	0.244703	1097	0.012437	1.1242	4	HUMAN	P17174	Aspartate aminotransferase, cytoplasmic	-2.0309	0.889521
7	4	-0.235	0.1689	0.849685	0.691255	0.244703	1098	0.0124255	1.1242	7	HUMAN	O14908	PDZ domain-containing protein GIPC1	-2.0309	0.889521
6	2	-0.236	0.1679	0.849096	0.687193	0.24598	1090	0.0125172	1.12342	6	HUMAN	Q9H3N1	Thioredoxin-related transmembrane protein 1	-2.02338	0.890137
2	2	-0.236	0.1679	0.849096	0.687193	0.24598	1091	0.0125057	1.12342	2	HUMAN	P05106	Integrin beta-3	-2.02338	0.890137
4	3	-0.236	0.1679	0.849096	0.687193	0.24598	1092	0.0124943	1.12342	4	HUMAN	O43264	Centromere/kinetochore protein zw10 homolog	-2.02338	0.890137
2	2	-0.237	0.1669	0.848508	0.683132	0.247262	1084	0.012586	1.12264	2	HUMAN	Q6KC79	Nipped-B-like protein	-2.01589	0.890755
3	3	-0.237	0.1669	0.848508	0.683132	0.247262	1085	0.0125745	1.12264	3	HUMAN	Q9Y263	Phospholipase A-2-activating protein	-2.01589	0.890755
6	2	-0.238	0.1659	0.84792	0.67907	0.248547	1078	0.0126547	1.12187	6	HUMAN	Q99460	26S proteasome non-ATPase regulatory subunit 1	-2.00841	0.891372
2	2	-0.238	0.1659	0.84792	0.67907	0.248547	1079	0.0126433	1.12187	2	HUMAN	Q8IY67	Ribonucleoprotein PTB-binding 1	-2.00841	0.891372
3	3	-0.238	0.1659	0.84792	0.67907	0.248547	1080	0.0126318	1.12187	3	HUMAN	P19634	Sodium/hydrogen exchanger 1	-2.00841	0.891372
43	9	-0.238	0.1659	0.84792	0.67907	0.248547	1081	0.0126204	1.12187	43	HUMAN	P35232	Prohibitin	-2.00841	0.891372
12	6	-0.239	0.1649	0.847332	0.675008	0.249835	1070	0.0127464	1.12109	12	HUMAN	P51114	Fragile X mental retardation syndrome-related protein 1	-2.00095	0.89199
10	7	-0.239	0.1649	0.847332	0.675008	0.249835	1071	0.012735	1.12109	10	HUMAN	Q6UB35	Monofunctional C1-tetrahydrofolate synthase, mitochondrial	-2.00095	0.89199
2	2	-0.24	0.1639	0.846745	0.670946	0.251127	1067	0.0127808	1.12031	2	HUMAN	Q9Y2D5	A-kinase anchor protein 2	-1.99351	0.892609
6	5	-0.24	0.1639	0.846745	0.670946	0.251127	1068	0.0127694	1.12031	6	HUMAN	Q13263	Transcription intermediary factor 1-beta	-1.99351	0.892609
10	6	-0.241	0.1629	0.846159	0.666885	0.252423	1063	0.0128267	1.11954	10	HUMAN	O00231	26S proteasome non-ATPase regulatory subunit 11	-1.98609	0.893228
8	7	-0.242	0.1619	0.845572	0.662823	0.253722	1060	0.0128611	1.11876	8	HUMAN	P54098	DNA polymerase subunit gamma-1	-1.97868	0.893847
8	7	-0.242	0.1619	0.845572	0.662823	0.253722	1061	0.0128496	1.11876	8	HUMAN	Q14151	Scaffold attachment factor B2	-1.97868	0.893847
12	3	-0.243	0.1609	0.844986	0.658761	0.255025	1058	0.012884	1.11798	12	HUMAN	P61026	Ras-related protein Rab-10	-1.97129	0.894467
3	2	-0.244	0.1599	0.844401	0.654699	0.256331	1053	0.0129413	1.11721	3	HUMAN	P62913	60S ribosomal protein L11	-1.96392	0.895087
6	3	-0.245	0.1589	0.843816	0.650638	0.25764	1050	0.0129757	1.11644	6	HUMAN	O15372	Eukaryotic translation initiation factor 3 subunit H	-1.95657	0.895708
3	3	-0.245	0.1589	0.843816	0.650638	0.25764	1051	0.0129642	1.11644	3	HUMAN	P46459	Vesicle-fusing ATPase	-1.95657	0.895708
7	5	-0.245	0.1589	0.843816	0.650638	0.25764	1052	0.0129528	1.11644	7	HUMAN	P78536	Disintegrin and metalloproteinase domain-containing protein 17	-1.95657	0.895708
3	2	-0.246	0.1579	0.843231	0.646576	0.258953	1046	0.0130215	1.11566	3	HUMAN	Q53EZ4	Centrosomal protein of 55 kDa	-1.94924	0.896329
7	5	-0.246	0.1579	0.843231	0.646576	0.258953	1047	0.0130101	1.11566	7	HUMAN	P61160	Actin-related protein 2	-1.94924	0.896329
2	2	-0.247	0.1569	0.842647	0.642514	0.26027	1039	0.0131018	1.11489	2	HUMAN	Q9Y2H6	Fibronectin type-III domain-containing protein 3A	-1.94192	0.89695
2	2	-0.247	0.1569	0.842647	0.642514	0.26027	1040	0.0130903	1.11489	2	HUMAN	P42226	Signal transducer and activator of transcription 6	-1.94192	0.89695
6	3	-0.247	0.1569	0.842647	0.642514	0.26027	1041	0.0130789	1.11489	6	HUMAN	Q15404	Ras suppressor protein 1	-1.94192	0.89695
4	3	-0.247	0.1569	0.842647	0.642514	0.26027	1042	0.0130674	1.11489	4	HUMAN	Q9NUQ7	Ufm1-specific protease 2	-1.94192	0.89695
5	3	-0.247	0.1569	0.842647	0.642514	0.26027	1043	0.0130559	1.11489	5	HUMAN	Q00325	Phosphate carrier protein, mitochondrial	-1.94192	0.89695
9	7	-0.247	0.1569	0.842647	0.642514	0.26027	1044	0.0130445	1.11489	9	HUMAN	Q96TA1	Niban-like protein 1	-1.94192	0.89695
3	2	-0.248	0.1559	0.842063	0.638452	0.26159	1035	0.0131476	1.11412	3	HUMAN	Q15388	Mitochondrial import receptor subunit TOM20 homolog	-1.93462	0.897572
3	2	-0.248	0.1559	0.842063	0.638452	0.26159	1036	0.0131362	1.11412	3	HUMAN	Q15070	Mitochondrial inner membrane protein OXA1L	-1.93462	0.897572
8	3	-0.248	0.1559	0.842063	0.638452	0.26159	1037	0.0131247	1.11412	8	HUMAN	Q9NVD7	Alpha-parvin	-1.93462	0.897572
3	3	-0.248	0.1559	0.842063	0.638452	0.26159	1038	0.0131133	1.11412	3	HUMAN	O94808	Glucosamine--fructose-6-phosphate aminotransferase [isomerizing] 2	-1.93462	0.897572
2	2	-0.249	0.1549	0.841479	0.634391	0.262913	1030	0.013205	1.11334	2	HUMAN	Q8TED1	Probable glutathione peroxidase 8	-1.92734	0.898195
6	5	-0.249	0.1549	0.841479	0.634391	0.262913	1031	0.0131935	1.11334	6	HUMAN	Q13616	Cullin-1	-1.92734	0.898195
12	3	-0.25	0.1539	0.840896	0.630329	0.26424	1025	0.0132623	1.11257	12	HUMAN	P45880	Voltage-dependent anion-selective channel protein 2	-1.92008	0.898817
2	2	-0.251	0.1529	0.840314	0.626267	0.26557	1015	0.0133769	1.1118	2	HUMAN	P48426	Phosphatidylinositol 5-phosphate 4-kinase type-2 alpha	-1.91284	0.899441
3	3	-0.251	0.1529	0.840314	0.626267	0.26557	1016	0.0133654	1.1118	3	HUMAN	P35250	Replication factor C subunit 2	-1.91284	0.899441
4	3	-0.251	0.1529	0.840314	0.626267	0.26557	1017	0.013354	1.1118	4	HUMAN	Q8IWB9	Testis-expressed sequence 2 protein	-1.91284	0.899441
16	4	-0.251	0.1529	0.840314	0.626267	0.26557	1018	0.0133425	1.1118	16	HUMAN	Q15286	Ras-related protein Rab-35	-1.91284	0.899441
5	4	-0.251	0.1529	0.840314	0.626267	0.26557	1019	0.013331	1.1118	5	HUMAN	Q96PY5	Formin-like protein 2	-1.91284	0.899441
13	10	-0.251	0.1529	0.840314	0.626267	0.26557	1020	0.0133196	1.1118	13	HUMAN	O75643	U5 small nuclear ribonucleoprotein 200 kDa helicase	-1.91284	0.899441
2	2	-0.252	0.1519	0.839731	0.622206	0.266903	1008	0.0134571	1.11103	2	HUMAN	O95182	NADH dehydrogenase [ubiquinone] 1 alpha subcomplex subunit 7	-1.90561	0.900064
2	2	-0.252	0.1519	0.839731	0.622206	0.266903	1009	0.0134457	1.11103	2	HUMAN	Q13617	Cullin-2	-1.90561	0.900064
6	3	-0.252	0.1519	0.839731	0.622206	0.266903	1010	0.0134342	1.11103	6	HUMAN	P29084	Transcription initiation factor IIE subunit beta	-1.90561	0.900064
12	5	-0.252	0.1519	0.839731	0.622206	0.266903	1011	0.0134227	1.11103	12	HUMAN	Q13247	Serine/arginine-rich splicing factor 6	-1.90561	0.900064
5	5	-0.252	0.1519	0.839731	0.622206	0.266903	1012	0.0134113	1.11103	5	HUMAN	Q96PK6	RNA-binding protein 14	-1.90561	0.900064
2	2	-0.253	0.1509	0.83915	0.618144	0.26824	1002	0.0135259	1.11026	2	HUMAN	Q15363	Transmembrane emp24 domain-containing protein 2	-1.8984	0.900688
3	3	-0.253	0.1509	0.83915	0.618144	0.26824	1003	0.0135144	1.11026	4	HUMAN	Q9HAV0|P62873|P62879	Guanine nucleotide-binding protein subunit beta-4	-1.8984	0.900688
12	7	-0.253	0.1509	0.83915	0.618144	0.26824	1004	0.013503	1.11026	12	HUMAN	Q96I24	Far upstream element-binding protein 3	-1.8984	0.900688
19	11	-0.253	0.1509	0.83915	0.618144	0.26824	1005	0.0134915	1.11026	19	HUMAN	P17844	Probable ATP-dependent RNA helicase DDX5	-1.8984	0.900688
2	2	-0.254	0.1499	0.838568	0.614082	0.269581	994	0.0136176	1.10949	2	HUMAN	Q13148	TAR DNA-binding protein 43	-1.89121	0.901313
4	2	-0.254	0.1499	0.838568	0.614082	0.269581	995	0.0136061	1.10949	4	HUMAN	Q9Y6A5	Transforming acidic coiled-coil-containing protein 3	-1.89121	0.901313
7	5	-0.254	0.1499	0.838568	0.614082	0.269581	996	0.0135947	1.10949	7	HUMAN	P63010	AP-2 complex subunit beta	-1.89121	0.901313
27	7	-0.254	0.1499	0.838568	0.614082	0.269581	997	0.0135832	1.10949	27	HUMAN	Q99623	Prohibitin-2	-1.89121	0.901313
8	4	-0.255	0.1489	0.837987	0.61002	0.270924	983	0.0137437	1.10872	8	HUMAN	Q99879|P58876|Q99877|Q5QNW6|P62807|Q93079|O60814|P57053|Q99880	Histone H2B type 1-M	-1.88404	0.901938
10	6	-0.255	0.1489	0.837987	0.61002	0.270924	984	0.0137322	1.10872	10	HUMAN	Q13561	Dynactin subunit 2	-1.88404	0.901938
15	6	-0.255	0.1489	0.837987	0.61002	0.270924	985	0.0137208	1.10872	15	HUMAN	P62258	14-3-3 protein epsilon	-1.88404	0.901938
7	6	-0.255	0.1489	0.837987	0.61002	0.270924	986	0.0137093	1.10872	7	HUMAN	Q16222	UDP-N-acetylhexosamine pyrophosphorylase	-1.88404	0.901938
6	6	-0.255	0.1489	0.837987	0.61002	0.270924	987	0.0136978	1.10872	6	HUMAN	Q9BQS8	FYVE and coiled-coil domain-containing protein 1	-1.88404	0.901938
17	7	-0.255	0.1489	0.837987	0.61002	0.270924	988	0.0136864	1.10872	17	HUMAN	P50395	Rab GDP dissociation inhibitor beta	-1.88404	0.901938
37	12	-0.255	0.1489	0.837987	0.61002	0.270924	989	0.0136749	1.10872	37	HUMAN	Q13423	NAD(P) transhydrogenase, mitochondrial	-1.88404	0.901938
5	2	-0.256	0.1479	0.837406	0.605959	0.272271	976	0.0138239	1.10796	5	HUMAN	P35237	Serpin B6	-1.87688	0.902563
15	7	-0.256	0.1479	0.837406	0.605959	0.272271	977	0.0138125	1.10796	15	HUMAN	P50991	T-complex protein 1 subunit delta	-1.87688	0.902563
27	19	-0.256	0.1479	0.837406	0.605959	0.272271	978	0.013801	1.10796	27	HUMAN	Q14980	Nuclear mitotic apparatus protein 1	-1.87688	0.902563
11	5	-0.257	0.1469	0.836826	0.601897	0.273621	970	0.0138927	1.10719	11	HUMAN	P46781	40S ribosomal protein S9	-1.86975	0.903189
13	6	-0.257	0.1469	0.836826	0.601897	0.273621	971	0.0138812	1.10719	13	HUMAN	Q92692	Poliovirus receptor-related protein 2	-1.86975	0.903189
3	2	-0.258	0.1459	0.836246	0.597835	0.274975	962	0.0139844	1.10642	3	HUMAN	Q9Y5S9	RNA-binding protein 8A	-1.86263	0.903815
2	2	-0.258	0.1459	0.836246	0.597835	0.274975	963	0.0139729	1.10642	2	HUMAN	Q06265	Exosome complex component RRP45	-1.86263	0.903815
5	3	-0.258	0.1459	0.836246	0.597835	0.274975	964	0.0139615	1.10642	5	HUMAN	Q15382	GTP-binding protein Rheb	-1.86263	0.903815
4	3	-0.258	0.1459	0.836246	0.597835	0.274975	965	0.01395	1.10642	4	HUMAN	P52306	Rap1 GTPase-GDP dissociation stimulator 1	-1.86263	0.903815
6	2	-0.259	0.1449	0.835667	0.593773	0.276332	957	0.0140417	1.10565	6	HUMAN	Q00765	Receptor expression-enhancing protein 5	-1.85553	0.904442
14	11	-0.259	0.1449	0.835667	0.593773	0.276332	958	0.0140303	1.10565	14	HUMAN	O15230	Laminin subunit alpha-5	-1.85553	0.904442
4	2	-0.26	0.1439	0.835088	0.589712	0.277692	954	0.0140761	1.10489	4	HUMAN	Q13444	Disintegrin and metalloproteinase domain-containing protein 15	-1.84844	0.905069
6	2	-0.26	0.1439	0.835088	0.589712	0.277692	955	0.0140646	1.10489	6	HUMAN	Q5HYC2	Uncharacterized protein KIAA2026	-1.84844	0.905069
8	5	-0.26	0.1439	0.835088	0.589712	0.277692	956	0.0140532	1.10489	8	HUMAN	P22234	Multifunctional protein ADE2	-1.84844	0.905069
2	2	-0.261	0.1429	0.834509	0.58565	0.279055	947	0.0141564	1.10412	2	HUMAN	Q9BPX6	Calcium uptake protein 1, mitochondrial	-1.84138	0.905697
3	2	-0.261	0.1429	0.834509	0.58565	0.279055	948	0.0141449	1.10412	3	HUMAN	Q96C01	Protein FAM136A	-1.84138	0.905697
4	3	-0.261	0.1429	0.834509	0.58565	0.279055	949	0.0141334	1.10412	4	HUMAN	Q15042	Rab3 GTPase-activating protein catalytic subunit	-1.84138	0.905697
4	4	-0.261	0.1429	0.834509	0.58565	0.279055	950	0.014122	1.10412	4	HUMAN	P50148	Guanine nucleotide-binding protein G(q) subunit alpha	-1.84138	0.905697
14	7	-0.261	0.1429	0.834509	0.58565	0.279055	951	0.0141105	1.10412	14	HUMAN	O75694	Nuclear pore complex protein Nup155	-1.84138	0.905697
3	2	-0.262	0.1419	0.833931	0.581588	0.280422	942	0.0142137	1.10336	3	HUMAN	O75340	Programmed cell death protein 6	-1.83433	0.906325
13	8	-0.262	0.1419	0.833931	0.581588	0.280422	943	0.0142022	1.10336	13	HUMAN	Q14974	Importin subunit beta-1	-1.83433	0.906325
19	9	-0.262	0.1419	0.833931	0.581588	0.280422	944	0.0141907	1.10336	19	HUMAN	O15031	Plexin-B2	-1.83433	0.906325
7	5	-0.263	0.1409	0.833353	0.577526	0.281792	937	0.014271	1.10259	7	HUMAN	Q13619	Cullin-4A	-1.8273	0.906953
5	2	-0.264	0.1399	0.832776	0.573465	0.283165	930	0.0143512	1.10183	5	HUMAN	P07948	Tyrosine-protein kinase Lyn	-1.82028	0.907582
7	3	-0.264	0.1399	0.832776	0.573465	0.283165	931	0.0143398	1.10183	7	HUMAN	P06493	Cyclin-dependent kinase 1	-1.82028	0.907582
5	4	-0.264	0.1399	0.832776	0.573465	0.283165	932	0.0143283	1.10183	9	HUMAN	P12931|P07947|P06241|P06239	Proto-oncogene tyrosine-protein kinase Src	-1.82028	0.907582
5	4	-0.264	0.1399	0.832776	0.573465	0.283165	933	0.0143168	1.10183	5	HUMAN	P20618	Proteasome subunit beta type-1	-1.82028	0.907582
29	14	-0.265	0.1389	0.832199	0.569403	0.284541	927	0.0143856	1.10107	29	HUMAN	P34932	Heat shock 70 kDa protein 4	-1.81329	0.908211
6	4	-0.266	0.1379	0.831622	0.565341	0.285921	925	0.0144085	1.1003	6	HUMAN	P04632	Calpain small subunit 1	-1.80631	0.908841
2	2	-0.267	0.1369	0.831046	0.561279	0.287304	918	0.0144888	1.09954	2	HUMAN	Q9Y315	Putative deoxyribose-phosphate aldolase	-1.79935	0.909471
3	2	-0.267	0.1369	0.831046	0.561279	0.287304	919	0.0144773	1.09954	3	HUMAN	Q86XL3	Ankyrin repeat and LEM domain-containing protein 2	-1.79935	0.909471
5	4	-0.267	0.1369	0.831046	0.561279	0.287304	920	0.0144658	1.09954	5	HUMAN	Q10567	AP-1 complex subunit beta-1	-1.79935	0.909471
12	4	-0.267	0.1369	0.831046	0.561279	0.287304	921	0.0144544	1.09954	12	HUMAN	P62158	Calmodulin	-1.79935	0.909471
14	4	-0.267	0.1369	0.831046	0.561279	0.287304	922	0.0144429	1.09954	14	HUMAN	O43684	Mitotic checkpoint protein BUB3	-1.79935	0.909471
8	5	-0.267	0.1369	0.831046	0.561279	0.287304	923	0.0144315	1.09954	8	HUMAN	Q9Y265	RuvB-like 1	-1.79935	0.909471
2	2	-0.268	0.1359	0.83047	0.557218	0.288689	907	0.0146149	1.09878	2	HUMAN	Q9BZE1	39S ribosomal protein L37, mitochondrial	-1.79241	0.910102
3	2	-0.268	0.1359	0.83047	0.557218	0.288689	908	0.0146034	1.09878	3	HUMAN	O43639	Cytoplasmic protein NCK2	-1.79241	0.910102
6	3	-0.268	0.1359	0.83047	0.557218	0.288689	909	0.0145919	1.09878	6	HUMAN	P48047	ATP synthase subunit O, mitochondrial	-1.79241	0.910102
3	3	-0.268	0.1359	0.83047	0.557218	0.288689	910	0.0145805	1.09878	3	HUMAN	Q9Y2W1	Thyroid hormone receptor-associated protein 3	-1.79241	0.910102
3	3	-0.268	0.1359	0.83047	0.557218	0.288689	911	0.014569	1.09878	3	HUMAN	P53602	Diphosphomevalonate decarboxylase	-1.79241	0.910102
3	3	-0.268	0.1359	0.83047	0.557218	0.288689	912	0.0145575	1.09878	3	HUMAN	Q13439	Golgin subfamily A member 4	-1.79241	0.910102
5	4	-0.268	0.1359	0.83047	0.557218	0.288689	913	0.0145461	1.09878	5	HUMAN	Q15691|Q9UPY8	Microtubule-associated protein RP/EB family member 1	-1.79241	0.910102
10	7	-0.268	0.1359	0.83047	0.557218	0.288689	914	0.0145346	1.09878	10	HUMAN	P30153	Serine/threonine-protein phosphatase 2A 65 kDa regulatory subunit A alpha isoform	-1.79241	0.910102
14	9	-0.268	0.1359	0.83047	0.557218	0.288689	915	0.0145232	1.09878	14	HUMAN	Q92616	Translational activator GCN1	-1.79241	0.910102
3	2	-0.269	0.1349	0.829895	0.553156	0.290078	900	0.0146951	1.09802	3	HUMAN	P54289	Voltage-dependent calcium channel subunit alpha-2/delta-1	-1.78549	0.910733
5	3	-0.269	0.1349	0.829895	0.553156	0.290078	901	0.0146836	1.09802	5	HUMAN	Q01130	Serine/arginine-rich splicing factor 2	-1.78549	0.910733
8	7	-0.269	0.1349	0.829895	0.553156	0.290078	902	0.0146722	1.09802	11	HUMAN	P11940|Q13310|Q9H361	Polyadenylate-binding protein 1	-1.78549	0.910733
9	7	-0.269	0.1349	0.829895	0.553156	0.290078	903	0.0146607	1.09802	9	HUMAN	Q04637	Eukaryotic translation initiation factor 4 gamma 1	-1.78549	0.910733
35	9	-0.269	0.1349	0.829895	0.553156	0.290078	904	0.0146492	1.09802	35	HUMAN	Q14764	Major vault protein	-1.78549	0.910733
2	2	-0.27	0.1339	0.82932	0.549094	0.29147	896	0.0147409	1.09726	2	HUMAN	O95834	Echinoderm microtubule-associated protein-like 2	-1.77858	0.911364
6	4	-0.27	0.1339	0.82932	0.549094	0.29147	897	0.0147295	1.09726	6	HUMAN	O43795	Unconventional myosin-Ib	-1.77858	0.911364
2	2	-0.271	0.1329	0.828745	0.545032	0.292866	893	0.0147753	1.0965	2	HUMAN	Q9Y3P9	Rab GTPase-activating protein 1	-1.77169	0.911996
4	3	-0.271	0.1329	0.828745	0.545032	0.292866	894	0.0147639	1.0965	4	HUMAN	P28066	Proteasome subunit alpha type-5	-1.77169	0.911996
31	7	-0.271	0.1329	0.828745	0.545032	0.292866	895	0.0147524	1.0965	31	HUMAN	P35613	Basigin	-1.77169	0.911996
2	2	-0.272	0.1319	0.828171	0.540971	0.294264	889	0.0148212	1.09574	2	HUMAN	Q9H0E2	Toll-interacting protein	-1.76482	0.912629
2	2	-0.272	0.1319	0.828171	0.540971	0.294264	890	0.0148097	1.09574	2	HUMAN	Q12972	Nuclear inhibitor of protein phosphatase 1	-1.76482	0.912629
15	5	-0.272	0.1319	0.828171	0.540971	0.294264	891	0.0147983	1.09574	15	HUMAN	Q08170|Q13243	Serine/arginine-rich splicing factor 4	-1.76482	0.912629
12	5	-0.272	0.1319	0.828171	0.540971	0.294264	892	0.0147868	1.09574	12	HUMAN	P49821	NADH dehydrogenase [ubiquinone] flavoprotein 1, mitochondrial	-1.76482	0.912629
8	4	-0.275	0.1289	0.82645	0.528786	0.298477	877	0.0149587	1.09346	8	HUMAN	P52597	Heterogeneous nuclear ribonucleoprotein F	-1.74431	0.914528
7	4	-0.275	0.1289	0.82645	0.528786	0.298477	878	0.0149473	1.09346	7	HUMAN	Q15365|P57721	Poly(rC)-binding protein 1	-1.74431	0.914528
10	8	-0.275	0.1289	0.82645	0.528786	0.298477	879	0.0149358	1.09346	10	HUMAN	P54577	Tyrosine--tRNA ligase, cytoplasmic	-1.74431	0.914528
2	2	-0.276	0.1279	0.825878	0.524724	0.299888	869	0.0150504	1.0927	2	HUMAN	Q9UKK3	Poly [ADP-ribose] polymerase 4	-1.73751	0.915163
3	2	-0.276	0.1279	0.825878	0.524724	0.299888	870	0.015039	1.0927	3	HUMAN	Q9H6R3	Acyl-CoA synthetase short-chain family member 3, mitochondrial	-1.73751	0.915163
2	2	-0.276	0.1279	0.825878	0.524724	0.299888	871	0.0150275	1.0927	2	HUMAN	P49747	Cartilage oligomeric matrix protein	-1.73751	0.915163
3	3	-0.276	0.1279	0.825878	0.524724	0.299888	872	0.015016	1.0927	3	HUMAN	P98160	Basement membrane-specific heparan sulfate proteoglycan core protein	-1.73751	0.915163
3	3	-0.276	0.1279	0.825878	0.524724	0.299888	873	0.0150046	1.0927	3	HUMAN	P38159	RNA-binding motif protein, X chromosome	-1.73751	0.915163
6	5	-0.276	0.1279	0.825878	0.524724	0.299888	874	0.0149931	1.0927	6	HUMAN	P62269	40S ribosomal protein S18	-1.73751	0.915163
25	7	-0.276	0.1279	0.825878	0.524724	0.299888	875	0.0149817	1.0927	32	HUMAN	P62820|Q9H0U4|Q92928|Q96E17|P20336|P20337|Q6IQ22|Q86YS6|A6NDJ8|Q9H082|Q14964|P59190|Q96AX2|Q96DA2|Q9NRW1|Q15771	Ras-related protein Rab-1A	-1.73751	0.915163
3	3	-0.277	0.1269	0.825305	0.520662	0.301301	866	0.0150848	1.09194	3	HUMAN	Q15435	Protein phosphatase 1 regulatory subunit 7	-1.73072	0.915797
3	3	-0.277	0.1269	0.825305	0.520662	0.301301	867	0.0150734	1.09194	3	HUMAN	Q9ULQ1	Two pore calcium channel protein 1	-1.73072	0.915797
7	5	-0.277	0.1269	0.825305	0.520662	0.301301	868	0.0150619	1.09194	7	HUMAN	P27348	14-3-3 protein theta	-1.73072	0.915797
7	2	-0.278	0.1259	0.824734	0.5166	0.302718	861	0.0151421	1.09119	7	HUMAN	P14866	Heterogeneous nuclear ribonucleoprotein L	-1.72396	0.916432
4	4	-0.278	0.1259	0.824734	0.5166	0.302718	862	0.0151307	1.09119	4	HUMAN	P45974	Ubiquitin carboxyl-terminal hydrolase 5	-1.72396	0.916432
5	4	-0.278	0.1259	0.824734	0.5166	0.302718	863	0.0151192	1.09119	5	HUMAN	Q5TZA2	Rootletin	-1.72396	0.916432
4	2	-0.279	0.1249	0.824162	0.512539	0.304137	850	0.0152682	1.09043	4	HUMAN	Q9NQG5	Regulation of nuclear pre-mRNA domain-containing protein 1B	-1.71721	0.917068
2	2	-0.279	0.1249	0.824162	0.512539	0.304137	851	0.0152568	1.09043	2	HUMAN	Q96FN4	Copine-2	-1.71721	0.917068
7	3	-0.279	0.1249	0.824162	0.512539	0.304137	852	0.0152453	1.09043	7	HUMAN	Q8IUD2|O15083	ELKS/Rab6-interacting/CAST family member 1	-1.71721	0.917068
4	3	-0.279	0.1249	0.824162	0.512539	0.304137	853	0.0152338	1.09043	4	HUMAN	Q92888	Rho guanine nucleotide exchange factor 1	-1.71721	0.917068
6	4	-0.279	0.1249	0.824162	0.512539	0.304137	854	0.0152224	1.09043	6	HUMAN	P33778|Q16778|P23527|P06899|Q6DN03|Q6DRA6|Q8N257	Histone H2B type 1-B	-1.71721	0.917068
6	4	-0.279	0.1249	0.824162	0.512539	0.304137	855	0.0152109	1.09043	6	HUMAN	P07099	Epoxide hydrolase 1	-1.71721	0.917068
6	5	-0.279	0.1249	0.824162	0.512539	0.304137	856	0.0151994	1.09043	6	HUMAN	Q07666	KH domain-containing, RNA-binding, signal transduction-associated protein 1	-1.71721	0.917068
24	8	-0.279	0.1249	0.824162	0.512539	0.304137	857	0.015188	1.09043	24	HUMAN	O14818|Q8TAA3	Proteasome subunit alpha type-7	-1.71721	0.917068
3	2	-0.28	0.1239	0.823591	0.508477	0.305559	844	0.015337	1.08968	3	HUMAN	O14967	Calmegin	-1.71047	0.917703
10	4	-0.28	0.1239	0.823591	0.508477	0.305559	845	0.0153255	1.08968	10	HUMAN	Q9BYD6	39S ribosomal protein L1, mitochondrial	-1.71047	0.917703
2	2	-0.281	0.1229	0.82302	0.504415	0.306985	835	0.0154402	1.08892	2	HUMAN	O14907	Tax1-binding protein 3	-1.70376	0.91834
2	2	-0.281	0.1229	0.82302	0.504415	0.306985	836	0.0154287	1.08892	2	HUMAN	Q05655	Protein kinase C delta type	-1.70376	0.91834
3	3	-0.281	0.1229	0.82302	0.504415	0.306985	837	0.0154172	1.08892	3	HUMAN	Q5W0Z9	Probable palmitoyltransferase ZDHHC20	-1.70376	0.91834
13	4	-0.281	0.1229	0.82302	0.504415	0.306985	838	0.0154058	1.08892	13	HUMAN	Q86V81	THO complex subunit 4	-1.70376	0.91834
8	4	-0.281	0.1229	0.82302	0.504415	0.306985	839	0.0153943	1.08892	8	HUMAN	P46087	Putative ribosomal RNA methyltransferase NOP2	-1.70376	0.91834
35	16	-0.281	0.1229	0.82302	0.504415	0.306985	840	0.0153829	1.08892	35	HUMAN	P11498	Pyruvate carboxylase, mitochondrial	-1.70376	0.91834
3	2	-0.282	0.1219	0.82245	0.500353	0.308413	825	0.0155548	1.08817	3	HUMAN	P49720	Proteasome subunit beta type-3	-1.69706	0.918977
3	2	-0.282	0.1219	0.82245	0.500353	0.308413	826	0.0155433	1.08817	3	HUMAN	Q9Y5S2	Serine/threonine-protein kinase MRCK beta	-1.69706	0.918977
4	3	-0.282	0.1219	0.82245	0.500353	0.308413	827	0.0155319	1.08817	4	HUMAN	P55036	26S proteasome non-ATPase regulatory subunit 4	-1.69706	0.918977
8	3	-0.282	0.1219	0.82245	0.500353	0.308413	828	0.0155204	1.08817	8	HUMAN	Q99536	Synaptic vesicle membrane protein VAT-1 homolog	-1.69706	0.918977
4	4	-0.282	0.1219	0.82245	0.500353	0.308413	829	0.0155089	1.08817	4	HUMAN	P12955	Xaa-Pro dipeptidase	-1.69706	0.918977
3	2	-0.283	0.1209	0.82188	0.496292	0.309844	818	0.015635	1.08741	3	HUMAN	Q92796	Disks large homolog 3	-1.69038	0.919614
3	3	-0.283	0.1209	0.82188	0.496292	0.309844	819	0.0156236	1.08741	3	HUMAN	P14649	Myosin light chain 6B	-1.69038	0.919614
3	3	-0.283	0.1209	0.82188	0.496292	0.309844	820	0.0156121	1.08741	3	HUMAN	Q6UWP7	Lysocardiolipin acyltransferase 1	-1.69038	0.919614
3	3	-0.283	0.1209	0.82188	0.496292	0.309844	821	0.0156006	1.08741	3	HUMAN	Q9H098	Protein FAM107B	-1.69038	0.919614
4	3	-0.283	0.1209	0.82188	0.496292	0.309844	822	0.0155892	1.08741	4	HUMAN	Q96JJ7	Protein disulfide-isomerase TMX3	-1.69038	0.919614
3	2	-0.284	0.1199	0.821311	0.49223	0.311278	815	0.0156694	1.08666	3	HUMAN	P50552	Vasodilator-stimulated phosphoprotein	-1.68372	0.920251
8	3	-0.285	0.1189	0.820742	0.488168	0.312715	804	0.0157955	1.08591	8	HUMAN	P60228	Eukaryotic translation initiation factor 3 subunit E	-1.67708	0.92089
3	3	-0.285	0.1189	0.820742	0.488168	0.312715	805	0.015784	1.08591	3	HUMAN	P84095	Rho-related GTP-binding protein RhoG	-1.67708	0.92089
8	6	-0.285	0.1189	0.820742	0.488168	0.312715	806	0.0157726	1.08591	8	HUMAN	P43246	DNA mismatch repair protein Msh2	-1.67708	0.92089
2	2	-0.286	0.1179	0.820173	0.484106	0.314155	795	0.0158987	1.08515	2	HUMAN	Q8TAQ2	SWI/SNF complex subunit SMARCC2	-1.67045	0.921528
2	2	-0.286	0.1179	0.820173	0.484106	0.314155	796	0.0158872	1.08515	2	HUMAN	Q96FZ7	Charged multivesicular body protein 6	-1.67045	0.921528
2	2	-0.286	0.1179	0.820173	0.484106	0.314155	797	0.0158757	1.08515	2	HUMAN	Q14651	Plastin-1	-1.67045	0.921528
3	3	-0.286	0.1179	0.820173	0.484106	0.314155	798	0.0158643	1.08515	3	HUMAN	O75821	Eukaryotic translation initiation factor 3 subunit G	-1.67045	0.921528
5	4	-0.286	0.1179	0.820173	0.484106	0.314155	799	0.0158528	1.08515	5	HUMAN	P38919	Eukaryotic initiation factor 4A-III	-1.67045	0.921528
6	3	-0.287	0.1169	0.819605	0.480045	0.315598	790	0.015956	1.0844	6	HUMAN	O75935	Dynactin subunit 3	-1.66384	0.922167
4	4	-0.287	0.1169	0.819605	0.480045	0.315598	791	0.0159445	1.0844	4	HUMAN	P78362	SRSF protein kinase 2	-1.66384	0.922167
16	5	-0.287	0.1169	0.819605	0.480045	0.315598	792	0.0159331	1.0844	16	HUMAN	Q9Y6N5	Sulfide:quinone oxidoreductase, mitochondrial	-1.66384	0.922167
2	2	-0.288	0.1159	0.819037	0.475983	0.317043	783	0.0160362	1.08365	2	HUMAN	Q8N442	Translation factor GUF1, mitochondrial	-1.65725	0.922806
10	6	-0.288	0.1159	0.819037	0.475983	0.317043	784	0.0160248	1.08365	10	HUMAN	Q02790	Peptidyl-prolyl cis-trans isomerase FKBP4	-1.65725	0.922806
33	13	-0.288	0.1159	0.819037	0.475983	0.317043	785	0.0160133	1.08365	33	HUMAN	P16615|O14983|Q93084	Sarcoplasmic/endoplasmic reticulum calcium ATPase 2	-1.65725	0.922806
85	17	-0.288	0.1159	0.819037	0.475983	0.317043	786	0.0160018	1.08365	85	HUMAN	P25705	ATP synthase subunit alpha, mitochondrial	-1.65725	0.922806
8	2	-0.289	0.1149	0.818469	0.471921	0.318492	776	0.0161165	1.0829	8	HUMAN	Q14CN4	Keratin, type II cytoskeletal 72	-1.65067	0.923446
2	2	-0.289	0.1149	0.818469	0.471921	0.318492	777	0.016105	1.0829	2	HUMAN	Q13214	Semaphorin-3B	-1.65067	0.923446
13	3	-0.289	0.1149	0.818469	0.471921	0.318492	778	0.0160935	1.0829	13	HUMAN	O15400	Syntaxin-7	-1.65067	0.923446
5	4	-0.289	0.1149	0.818469	0.471921	0.318492	779	0.0160821	1.0829	5	HUMAN	Q9Y2L1	Exosome complex exonuclease RRP44	-1.65067	0.923446
4	2	-0.29	0.1139	0.817902	0.467859	0.319943	769	0.0161967	1.08215	4	HUMAN	Q02543	60S ribosomal protein L18a	-1.64412	0.924087
2	2	-0.29	0.1139	0.817902	0.467859	0.319943	770	0.0161852	1.08215	2	HUMAN	P09132	Signal recognition particle 19 kDa protein	-1.64412	0.924087
5	3	-0.29	0.1139	0.817902	0.467859	0.319943	771	0.0161738	1.08215	5	HUMAN	Q13242	Serine/arginine-rich splicing factor 9	-1.64412	0.924087
8	3	-0.29	0.1139	0.817902	0.467859	0.319943	772	0.0161623	1.08215	8	HUMAN	Q9H4A3	Serine/threonine-protein kinase WNK1	-1.64412	0.924087
3	3	-0.291	0.1129	0.817335	0.463798	0.321396	766	0.0162311	1.0814	3	HUMAN	O94874	E3 UFM1-protein ligase 1	-1.63757	0.924727
4	4	-0.291	0.1129	0.817335	0.463798	0.321396	767	0.0162196	1.0814	4	HUMAN	P32189|Q14409	Glycerol kinase	-1.63757	0.924727
2	2	-0.292	0.1119	0.816769	0.459736	0.322853	763	0.0162655	1.08065	2	HUMAN	Q2TAY7	WD40 repeat-containing protein SMU1	-1.63105	0.925369
3	3	-0.292	0.1119	0.816769	0.459736	0.322853	764	0.016254	1.08065	3	HUMAN	P61764	Syntaxin-binding protein 1	-1.63105	0.925369
6	5	-0.292	0.1119	0.816769	0.459736	0.322853	765	0.0162425	1.08065	6	HUMAN	Q8WX93|Q86TC9	Palladin	-1.63105	0.925369
14	2	-0.293	0.1109	0.816203	0.455674	0.324312	755	0.0163572	1.0799	14	HUMAN	P01033	Metalloproteinase inhibitor 1	-1.62455	0.92601
5	3	-0.293	0.1109	0.816203	0.455674	0.324312	756	0.0163457	1.0799	5	HUMAN	P40925	Malate dehydrogenase, cytoplasmic	-1.62455	0.92601
3	3	-0.293	0.1109	0.816203	0.455674	0.324312	757	0.0163343	1.0799	3	HUMAN	Q99436	Proteasome subunit beta type-7	-1.62455	0.92601
3	3	-0.293	0.1109	0.816203	0.455674	0.324312	758	0.0163228	1.0799	3	HUMAN	P28070	Proteasome subunit beta type-4	-1.62455	0.92601
5	4	-0.293	0.1109	0.816203	0.455674	0.324312	759	0.0163113	1.0799	5	HUMAN	Q9BXP5	Serrate RNA effector molecule homolog	-1.62455	0.92601
10	5	-0.293	0.1109	0.816203	0.455674	0.324312	760	0.0162999	1.0799	10	HUMAN	P25788	Proteasome subunit alpha type-3	-1.62455	0.92601
26	8	-0.293	0.1109	0.816203	0.455674	0.324312	761	0.0162884	1.0799	26	HUMAN	P40939	Trifunctional enzyme subunit alpha, mitochondrial	-1.62455	0.92601
4	2	-0.294	0.1099	0.815637	0.451613	0.325774	750	0.0164145	1.07915	4	HUMAN	Q9NRV9	Heme-binding protein 1	-1.61806	0.926652
12	4	-0.294	0.1099	0.815637	0.451613	0.325774	751	0.016403	1.07915	12	HUMAN	P61289	Proteasome activator complex subunit 3	-1.61806	0.926652
12	5	-0.294	0.1099	0.815637	0.451613	0.325774	752	0.0163916	1.07915	12	HUMAN	Q13185	Chromobox protein homolog 3	-1.61806	0.926652
11	10	-0.294	0.1099	0.815637	0.451613	0.325774	753	0.0163801	1.07915	11	HUMAN	Q08211	ATP-dependent RNA helicase A	-1.61806	0.926652
2	2	-0.295	0.1089	0.815072	0.447551	0.327239	737	0.0165635	1.07841	2	HUMAN	O00170	AH receptor-interacting protein	-1.61158	0.927295
3	2	-0.295	0.1089	0.815072	0.447551	0.327239	738	0.016552	1.07841	3	HUMAN	Q9NXE4	Sphingomyelin phosphodiesterase 4	-1.61158	0.927295
2	2	-0.295	0.1089	0.815072	0.447551	0.327239	739	0.0165406	1.07841	2	HUMAN	Q76M96	Coiled-coil domain-containing protein 80	-1.61158	0.927295
6	3	-0.295	0.1089	0.815072	0.447551	0.327239	740	0.0165291	1.07841	6	HUMAN	P60900	Proteasome subunit alpha type-6	-1.61158	0.927295
12	7	-0.295	0.1089	0.815072	0.447551	0.327239	741	0.0165177	1.07841	12	HUMAN	P11216	Glycogen phosphorylase, brain form	-1.61158	0.927295
2	2	-0.296	0.1079	0.814508	0.443489	0.328706	730	0.0166437	1.07766	2	HUMAN	Q10570	Cleavage and polyadenylation specificity factor subunit 1	-1.60513	0.927938
2	2	-0.296	0.1079	0.814508	0.443489	0.328706	731	0.0166323	1.07766	2	HUMAN	P78332	RNA-binding protein 6	-1.60513	0.927938
4	3	-0.296	0.1079	0.814508	0.443489	0.328706	732	0.0166208	1.07766	4	HUMAN	P15374	Ubiquitin carboxyl-terminal hydrolase isozyme L3	-1.60513	0.927938
2	2	-0.297	0.1069	0.813943	0.439427	0.330176	722	0.0167354	1.07691	2	HUMAN	Q96H20	Vacuolar-sorting protein SNF8	-1.59869	0.928581
4	3	-0.297	0.1069	0.813943	0.439427	0.330176	723	0.016724	1.07691	4	HUMAN	Q7L0Y3	Mitochondrial ribonuclease P protein 1	-1.59869	0.928581
4	4	-0.297	0.1069	0.813943	0.439427	0.330176	724	0.0167125	1.07691	5	HUMAN	Q96SB4|Q9UPE1	SRSF protein kinase 1	-1.59869	0.928581
6	5	-0.297	0.1069	0.813943	0.439427	0.330176	725	0.0167011	1.07691	6	HUMAN	Q99615	DnaJ homolog subfamily C member 7	-1.59869	0.928581
10	6	-0.297	0.1069	0.813943	0.439427	0.330176	726	0.0166896	1.07691	10	HUMAN	P41252	Isoleucine--tRNA ligase, cytoplasmic	-1.59869	0.928581
2	2	-0.298	0.1059	0.813379	0.435366	0.331649	716	0.0168042	1.07617	2	HUMAN	O60443	Non-syndromic hearing impairment protein 5	-1.59227	0.929225
2	2	-0.298	0.1059	0.813379	0.435366	0.331649	717	0.0167928	1.07617	2	HUMAN	Q9BSJ2	Gamma-tubulin complex component 2	-1.59227	0.929225
2	2	-0.298	0.1059	0.813379	0.435366	0.331649	718	0.0167813	1.07617	2	HUMAN	P08237	6-phosphofructokinase, muscle type	-1.59227	0.929225
3	2	-0.299	0.1049	0.812816	0.431304	0.333124	710	0.016873	1.07542	3	HUMAN	Q86TI2	Dipeptidyl peptidase 9	-1.58587	0.929869
2	2	-0.299	0.1049	0.812816	0.431304	0.333124	711	0.0168615	1.07542	2	HUMAN	P58557	rRNA maturation factor homolog	-1.58587	0.929869
3	3	-0.299	0.1049	0.812816	0.431304	0.333124	712	0.0168501	1.07542	3	HUMAN	Q8NCG7	Sn1-specific diacylglycerol lipase beta	-1.58587	0.929869
13	5	-0.299	0.1049	0.812816	0.431304	0.333124	713	0.0168386	1.07542	13	HUMAN	P67775|P62714	Serine/threonine-protein phosphatase 2A catalytic subunit alpha isoform	-1.58587	0.929869
2	2	-0.3	0.1039	0.812252	0.427242	0.334602	703	0.0169532	1.07467	2	HUMAN	O75151	Lysine-specific demethylase PHF2	-1.57948	0.930514
6	3	-0.3	0.1039	0.812252	0.427242	0.334602	704	0.0169418	1.07467	6	HUMAN	Q15366	Poly(rC)-binding protein 2	-1.57948	0.930514
4	3	-0.3	0.1039	0.812252	0.427242	0.334602	705	0.0169303	1.07467	4	HUMAN	Q9HB71	Calcyclin-binding protein	-1.57948	0.930514
13	6	-0.3	0.1039	0.812252	0.427242	0.334602	706	0.0169188	1.07467	13	HUMAN	O75083	WD repeat-containing protein 1	-1.57948	0.930514
10	6	-0.3	0.1039	0.812252	0.427242	0.334602	707	0.0169074	1.07467	10	HUMAN	P31153	S-adenosylmethionine synthase isoform type-2	-1.57948	0.930514
3	2	-0.301	0.1029	0.81169	0.42318	0.336082	696	0.0170335	1.07393	3	HUMAN	Q5T160	Probable arginine--tRNA ligase, mitochondrial	-1.57312	0.931159
2	2	-0.301	0.1029	0.81169	0.42318	0.336082	697	0.017022	1.07393	2	HUMAN	O43809	Cleavage and polyadenylation specificity factor subunit 5	-1.57312	0.931159
3	2	-0.301	0.1029	0.81169	0.42318	0.336082	698	0.0170105	1.07393	3	HUMAN	P52732	Kinesin-like protein KIF11	-1.57312	0.931159
2	2	-0.301	0.1029	0.81169	0.42318	0.336082	699	0.0169991	1.07393	2	HUMAN	Q13573	SNW domain-containing protein 1	-1.57312	0.931159
2	2	-0.301	0.1029	0.81169	0.42318	0.336082	700	0.0169876	1.07393	2	HUMAN	Q15020	Squamous cell carcinoma antigen recognized by T-cells 3	-1.57312	0.931159
9	3	-0.301	0.1029	0.81169	0.42318	0.336082	701	0.0169762	1.07393	9	HUMAN	Q9NW15	Anoctamin-10	-1.57312	0.931159
3	3	-0.301	0.1029	0.81169	0.42318	0.336082	702	0.0169647	1.07393	3	HUMAN	Q14694	Ubiquitin carboxyl-terminal hydrolase 10	-1.57312	0.931159
6	3	-0.302	0.1019	0.811127	0.419119	0.337565	694	0.0170564	1.07319	6	HUMAN	P20645	Cation-dependent mannose-6-phosphate receptor	-1.56676	0.931805
2	2	-0.303	0.1009	0.810565	0.415057	0.33905	689	0.0171137	1.07244	2	HUMAN	Q14914	Prostaglandin reductase 1	-1.56043	0.932451
4	3	-0.303	0.1009	0.810565	0.415057	0.33905	690	0.0171022	1.07244	4	HUMAN	Q15819|Q13404	Ubiquitin-conjugating enzyme E2 variant 2	-1.56043	0.932451
8	4	-0.303	0.1009	0.810565	0.415057	0.33905	691	0.0170908	1.07244	8	HUMAN	P25789	Proteasome subunit alpha type-4	-1.56043	0.932451
4	4	-0.303	0.1009	0.810565	0.415057	0.33905	692	0.0170793	1.07244	4	HUMAN	O15228	Dihydroxyacetone phosphate acyltransferase	-1.56043	0.932451
9	5	-0.303	0.1009	0.810565	0.415057	0.33905	693	0.0170679	1.07244	9	HUMAN	P51991	Heterogeneous nuclear ribonucleoprotein A3	-1.56043	0.932451
2	2	-0.304	0.0999	0.810003	0.410995	0.340538	685	0.0171596	1.0717	2	HUMAN	Q01081	Splicing factor U2AF 35 kDa subunit	-1.55411	0.933098
6	5	-0.304	0.0999	0.810003	0.410995	0.340538	686	0.0171481	1.0717	6	HUMAN	O95479	GDH/6PGL endoplasmic bifunctional protein	-1.55411	0.933098
13	4	-0.305	0.0989	0.809442	0.406933	0.342028	673	0.0172971	1.07096	13	HUMAN	Q9NP72	Ras-related protein Rab-18	-1.54781	0.933745
11	4	-0.305	0.0989	0.809442	0.406933	0.342028	674	0.0172856	1.07096	11	HUMAN	P62333	26S protease regulatory subunit 10B	-1.54781	0.933745
6	5	-0.305	0.0989	0.809442	0.406933	0.342028	675	0.0172742	1.07096	6	HUMAN	Q92896	Golgi apparatus protein 1	-1.54781	0.933745
9	6	-0.305	0.0989	0.809442	0.406933	0.342028	676	0.0172627	1.07096	9	HUMAN	P50416	Carnitine O-palmitoyltransferase 1, liver isoform	-1.54781	0.933745
7	6	-0.305	0.0989	0.809442	0.406933	0.342028	677	0.0172513	1.07096	7	HUMAN	P78347|Q86UP8|Q6EKJ0	General transcription factor II-I	-1.54781	0.933745
13	10	-0.305	0.0989	0.809442	0.406933	0.342028	678	0.0172398	1.07096	13	HUMAN	Q6P2Q9	Pre-mRNA-processing-splicing factor 8	-1.54781	0.933745
3	2	-0.306	0.0979	0.808881	0.402872	0.343521	668	0.0173544	1.07021	3	HUMAN	Q56VL3	OCIA domain-containing protein 2	-1.54153	0.934392
17	3	-0.306	0.0979	0.808881	0.402872	0.343521	669	0.017343	1.07021	17	HUMAN	P30049	ATP synthase subunit delta, mitochondrial	-1.54153	0.934392
9	3	-0.306	0.0979	0.808881	0.402872	0.343521	670	0.0173315	1.07021	9	HUMAN	P15153	Ras-related C3 botulinum toxin substrate 2	-1.54153	0.934392
17	10	-0.306	0.0979	0.808881	0.402872	0.343521	671	0.01732	1.07021	17	HUMAN	Q14008	Cytoskeleton-associated protein 5	-1.54153	0.934392
2	2	-0.307	0.0969	0.808321	0.39881	0.345017	659	0.0174576	1.06947	2	HUMAN	Q16678	Cytochrome P450 1B1	-1.53526	0.93504
5	4	-0.307	0.0969	0.808321	0.39881	0.345017	660	0.0174461	1.06947	5	HUMAN	Q8IZ83	Aldehyde dehydrogenase family 16 member A1	-1.53526	0.93504
7	4	-0.307	0.0969	0.808321	0.39881	0.345017	661	0.0174347	1.06947	7	HUMAN	Q9BZZ5	Apoptosis inhibitor 5	-1.53526	0.93504
7	6	-0.307	0.0969	0.808321	0.39881	0.345017	662	0.0174232	1.06947	7	HUMAN	O15231	Zinc finger protein 185	-1.53526	0.93504
2	2	-0.308	0.0959	0.807761	0.394748	0.346514	645	0.0176181	1.06873	2	HUMAN	Q9Y3B4	Pre-mRNA branch site protein p14	-1.52901	0.935688
7	3	-0.308	0.0959	0.807761	0.394748	0.346514	646	0.0176066	1.06873	7	HUMAN	Q9UNM6	26S proteasome non-ATPase regulatory subunit 13	-1.52901	0.935688
4	3	-0.308	0.0959	0.807761	0.394748	0.346514	647	0.0175951	1.06873	4	HUMAN	Q7KYR7	Butyrophilin subfamily 2 member A1	-1.52901	0.935688
13	4	-0.308	0.0959	0.807761	0.394748	0.346514	648	0.0175837	1.06873	13	HUMAN	P43121	Cell surface glycoprotein MUC18	-1.52901	0.935688
4	4	-0.308	0.0959	0.807761	0.394748	0.346514	649	0.0175722	1.06873	4	HUMAN	Q15393	Splicing factor 3B subunit 3	-1.52901	0.935688
9	6	-0.308	0.0959	0.807761	0.394748	0.346514	650	0.0175608	1.06873	10	HUMAN	O75533|Q8WZ74	Splicing factor 3B subunit 1	-1.52901	0.935688
20	10	-0.308	0.0959	0.807761	0.394748	0.346514	651	0.0175493	1.06873	20	HUMAN	P34897	Serine hydroxymethyltransferase, mitochondrial	-1.52901	0.935688
4	2	-0.309	0.0949	0.807201	0.390686	0.348015	638	0.0176983	1.06799	4	HUMAN	P46060	Ran GTPase-activating protein 1	-1.52278	0.936337
2	2	-0.309	0.0949	0.807201	0.390686	0.348015	639	0.0176868	1.06799	2	HUMAN	Q9UKA4	A-kinase anchor protein 11	-1.52278	0.936337
4	4	-0.309	0.0949	0.807201	0.390686	0.348015	640	0.0176754	1.06799	4	HUMAN	Q96QR8	Transcriptional activator protein Pur-beta	-1.52278	0.936337
3	2	-0.31	0.0939	0.806642	0.386625	0.349517	630	0.01779	1.06725	3	HUMAN	P56385	ATP synthase subunit e, mitochondrial	-1.51657	0.936986
4	2	-0.31	0.0939	0.806642	0.386625	0.349517	631	0.0177785	1.06725	4	HUMAN	O14617	AP-3 complex subunit delta-1	-1.51657	0.936986
7	5	-0.31	0.0939	0.806642	0.386625	0.349517	632	0.0177671	1.06725	7	HUMAN	Q6IBS0	Twinfilin-2	-1.51657	0.936986
10	6	-0.31	0.0939	0.806642	0.386625	0.349517	633	0.0177556	1.06725	10	HUMAN	O43390	Heterogeneous nuclear ribonucleoprotein R	-1.51657	0.936986
11	7	-0.31	0.0939	0.806642	0.386625	0.349517	634	0.0177442	1.06725	11	HUMAN	O60763	General vesicular transport factor p115	-1.51657	0.936986
8	8	-0.31	0.0939	0.806642	0.386625	0.349517	635	0.0177327	1.06725	8	HUMAN	O43491	Band 4.1-like protein 2	-1.51657	0.936986
2	2	-0.311	0.0929	0.806083	0.382563	0.351022	623	0.0178702	1.06651	2	HUMAN	P49757|Q9Y6R0	Numb-like protein	-1.51037	0.937636
4	3	-0.311	0.0929	0.806083	0.382563	0.351022	624	0.0178588	1.06651	4	HUMAN	P28072	Proteasome subunit beta type-6	-1.51037	0.937636
5	4	-0.311	0.0929	0.806083	0.382563	0.351022	625	0.0178473	1.06651	5	HUMAN	P33993	DNA replication licensing factor MCM7	-1.51037	0.937636
18	10	-0.311	0.0929	0.806083	0.382563	0.351022	626	0.0178359	1.06651	18	HUMAN	O95347	Structural maintenance of chromosomes protein 2	-1.51037	0.937636
5	2	-0.312	0.0919	0.805524	0.378501	0.352529	619	0.0179161	1.06577	5	HUMAN	Q99873	Protein arginine N-methyltransferase 1	-1.50419	0.938286
9	2	-0.312	0.0919	0.805524	0.378501	0.352529	620	0.0179046	1.06577	9	HUMAN	Q15843	NEDD8	-1.50419	0.938286
9	4	-0.312	0.0919	0.805524	0.378501	0.352529	621	0.0178932	1.06577	9	HUMAN	Q96AQ8	Coiled-coil domain-containing protein 90A, mitochondrial	-1.50419	0.938286
3	2	-0.313	0.0909	0.804966	0.374439	0.354039	614	0.0179734	1.06503	3	HUMAN	Q96A35	39S ribosomal protein L24, mitochondrial	-1.49802	0.938937
9	6	-0.313	0.0909	0.804966	0.374439	0.354039	615	0.0179619	1.06503	9	HUMAN	P61978	Heterogeneous nuclear ribonucleoprotein K	-1.49802	0.938937
2	2	-0.314	0.0899	0.804408	0.370378	0.355551	609	0.0180307	1.0643	2	HUMAN	Q9UIJ5	Palmitoyltransferase ZDHHC2	-1.49187	0.939588
3	3	-0.314	0.0899	0.804408	0.370378	0.355551	610	0.0180193	1.0643	3	HUMAN	P30154	Serine/threonine-protein phosphatase 2A 65 kDa regulatory subunit A beta isoform	-1.49187	0.939588
4	4	-0.314	0.0899	0.804408	0.370378	0.355551	611	0.0180078	1.0643	4	HUMAN	Q13347	Eukaryotic translation initiation factor 3 subunit I	-1.49187	0.939588
2	2	-0.315	0.0889	0.803851	0.366316	0.357065	602	0.018111	1.06356	2	HUMAN	Q15257	Serine/threonine-protein phosphatase 2A activator	-1.48574	0.940239
4	2	-0.315	0.0889	0.803851	0.366316	0.357065	603	0.0180995	1.06356	4	HUMAN	P52848	Bifunctional heparan sulfate N-deacetylase/N-sulfotransferase 1	-1.48574	0.940239
3	3	-0.315	0.0889	0.803851	0.366316	0.357065	604	0.018088	1.06356	3	HUMAN	Q9P2N5	RNA-binding protein 27	-1.48574	0.940239
4	3	-0.315	0.0889	0.803851	0.366316	0.357065	605	0.0180766	1.06356	4	HUMAN	Q9NR12	PDZ and LIM domain protein 7	-1.48574	0.940239
19	7	-0.315	0.0889	0.803851	0.366316	0.357065	606	0.0180651	1.06356	19	HUMAN	Q16543	Hsp90 co-chaperone Cdc37	-1.48574	0.940239
15	8	-0.316	0.0879	0.803294	0.362254	0.358581	597	0.0181683	1.06282	15	HUMAN	O60664	Perilipin-3	-1.47963	0.940891
9	3	-0.317	0.0869	0.802737	0.358193	0.3601	590	0.0182485	1.06209	9	HUMAN	P01112	GTPase HRas	-1.47353	0.941544
5	3	-0.317	0.0869	0.802737	0.358193	0.3601	591	0.018237	1.06209	5	HUMAN	Q96ER9	Coiled-coil domain-containing protein 51	-1.47353	0.941544
7	4	-0.318	0.0859	0.802181	0.354131	0.36162	585	0.0183058	1.06135	7	HUMAN	P06703	Protein S100-A6	-1.46745	0.942197
295	78	-0.318	0.0859	0.802181	0.354131	0.36162	586	0.0182944	1.06135	212	HUMAN	Q09666	Neuroblast differentiation-associated protein AHNAK	-1.46745	0.942197
19	7	-0.319	0.0849	0.801625	0.350069	0.363143	581	0.0183517	1.06061	19	HUMAN	P11387	DNA topoisomerase 1	-1.46139	0.94285
79	14	-0.319	0.0849	0.801625	0.350069	0.363143	582	0.0183402	1.06061	79	HUMAN	P05023|P13637|P50993|P54707|P20648|Q13733	Sodium/potassium-transporting ATPase subunit alpha-1	-1.46139	0.94285
3	2	-0.32	0.0839	0.80107	0.346007	0.364669	577	0.0183975	1.05988	3	HUMAN	P51665	26S proteasome non-ATPase regulatory subunit 7	-1.45534	0.943504
6	4	-0.32	0.0839	0.80107	0.346007	0.364669	578	0.0183861	1.05988	6	HUMAN	P49790	Nuclear pore complex protein Nup153	-1.45534	0.943504
10	7	-0.32	0.0839	0.80107	0.346007	0.364669	579	0.0183746	1.05988	10	HUMAN	P14868	Aspartate--tRNA ligase, cytoplasmic	-1.45534	0.943504
22	8	-0.32	0.0839	0.80107	0.346007	0.364669	580	0.0183631	1.05988	22	HUMAN	Q9UJZ1	Stomatin-like protein 2	-1.45534	0.943504
3	2	-0.321	0.0829	0.800515	0.341946	0.366196	572	0.0184548	1.05914	3	HUMAN	Q9H4G4	Golgi-associated plant pathogenesis-related protein 1	-1.44931	0.944158
2	2	-0.321	0.0829	0.800515	0.341946	0.366196	573	0.0184434	1.05914	2	HUMAN	P51149	Ras-related protein Rab-7a	-1.44931	0.944158
11	4	-0.321	0.0829	0.800515	0.341946	0.366196	574	0.0184319	1.05914	11	HUMAN	P62753	40S ribosomal protein S6	-1.44931	0.944158
35	20	-0.321	0.0829	0.800515	0.341946	0.366196	575	0.0184204	1.05914	35	HUMAN	P18206	Vinculin	-1.44931	0.944158
16	3	-0.322	0.0819	0.79996	0.337884	0.367725	562	0.0185695	1.05841	16	HUMAN	Q9UKK9	ADP-sugar pyrophosphatase	-1.4433	0.944813
3	3	-0.322	0.0819	0.79996	0.337884	0.367725	563	0.018558	1.05841	3	HUMAN	O75146	Huntingtin-interacting protein 1-related protein	-1.4433	0.944813
5	4	-0.322	0.0819	0.79996	0.337884	0.367725	564	0.0185465	1.05841	5	HUMAN	O75663	TIP41-like protein	-1.4433	0.944813
7	5	-0.322	0.0819	0.79996	0.337884	0.367725	565	0.0185351	1.05841	7	HUMAN	Q9BUQ8	Probable ATP-dependent RNA helicase DDX23	-1.4433	0.944813
7	6	-0.322	0.0819	0.79996	0.337884	0.367725	566	0.0185236	1.05841	7	HUMAN	A1L0T0	Acetolactate synthase-like protein	-1.4433	0.944813
9	9	-0.322	0.0819	0.79996	0.337884	0.367725	567	0.0185122	1.05841	9	HUMAN	Q9Y4G6	Talin-2	-1.4433	0.944813
2	2	-0.323	0.0809	0.799406	0.333822	0.369257	556	0.0186382	1.05768	2	HUMAN	P61163	Alpha-centractin	-1.4373	0.945468
5	4	-0.323	0.0809	0.799406	0.333822	0.369257	557	0.0186268	1.05768	5	HUMAN	Q15459	Splicing factor 3A subunit 1	-1.4373	0.945468
24	10	-0.323	0.0809	0.799406	0.333822	0.369257	558	0.0186153	1.05768	24	HUMAN	O43242	26S proteasome non-ATPase regulatory subunit 3	-1.4373	0.945468
2	2	-0.325	0.0789	0.798298	0.325699	0.372326	543	0.0187873	1.05621	2	HUMAN	P37198	Nuclear pore glycoprotein p62	-1.42536	0.946779
4	3	-0.325	0.0789	0.798298	0.325699	0.372326	544	0.0187758	1.05621	4	HUMAN	P26599|O95758	Polypyrimidine tract-binding protein 1	-1.42536	0.946779
6	5	-0.325	0.0789	0.798298	0.325699	0.372326	545	0.0187643	1.05621	6	HUMAN	P49756	RNA-binding protein 25	-1.42536	0.946779
9	6	-0.325	0.0789	0.798298	0.325699	0.372326	546	0.0187529	1.05621	9	HUMAN	Q7L014	Probable ATP-dependent RNA helicase DDX46	-1.42536	0.946779
11	7	-0.325	0.0789	0.798298	0.325699	0.372326	547	0.0187414	1.05621	11	HUMAN	P11047	Laminin subunit gamma-1	-1.42536	0.946779
14	7	-0.325	0.0789	0.798298	0.325699	0.372326	548	0.0187299	1.05621	14	HUMAN	P36957	Dihydrolipoyllysine-residue succinyltransferase component of 2-oxoglutarate dehydrogenase complex, mitochondrial	-1.42536	0.946779
8	8	-0.325	0.0789	0.798298	0.325699	0.372326	549	0.0187185	1.05621	8	HUMAN	P30622	CAP-Gly domain-containing linker protein 1	-1.42536	0.946779
7	5	-0.326	0.0779	0.797745	0.321637	0.373864	537	0.018856	1.05548	7	HUMAN	O15067	Phosphoribosylformylglycinamidine synthase	-1.41941	0.947436
24	12	-0.327	0.0769	0.797192	0.317575	0.375404	531	0.0189248	1.05475	24	HUMAN	P09874	Poly [ADP-ribose] polymerase 1	-1.41349	0.948093
53	28	-0.327	0.0769	0.797192	0.317575	0.375404	532	0.0189133	1.05475	53	HUMAN	Q9Y490	Talin-1	-1.41349	0.948093
6	3	-0.328	0.0759	0.79664	0.313513	0.376945	524	0.019005	1.05402	6	HUMAN	Q99613	Eukaryotic translation initiation factor 3 subunit C	-1.40757	0.94875
6	5	-0.328	0.0759	0.79664	0.313513	0.376945	525	0.0189936	1.05402	6	HUMAN	Q04917	14-3-3 protein eta	-1.40757	0.94875
6	5	-0.328	0.0759	0.79664	0.313513	0.376945	526	0.0189821	1.05402	6	HUMAN	P14923	Junction plakoglobin	-1.40757	0.94875
2	2	-0.329	0.0749	0.796088	0.309452	0.378489	518	0.0190738	1.05329	2	HUMAN	Q9Y5K5	Ubiquitin carboxyl-terminal hydrolase isozyme L5	-1.40168	0.949408
8	7	-0.329	0.0749	0.796088	0.309452	0.378489	519	0.0190624	1.05329	8	HUMAN	Q86VP1	Tax1-binding protein 1	-1.40168	0.949408
20	11	-0.329	0.0749	0.796088	0.309452	0.378489	520	0.0190509	1.05329	20	HUMAN	P35998	26S protease regulatory subunit 7	-1.40168	0.949408
5	3	-0.33	0.0739	0.795536	0.30539	0.380035	512	0.0191426	1.05256	5	HUMAN	Q9UHX1	Poly(U)-binding-splicing factor PUF60	-1.3958	0.950066
8	7	-0.33	0.0739	0.795536	0.30539	0.380035	513	0.0191311	1.05256	8	HUMAN	O95782	AP-2 complex subunit alpha-1	-1.3958	0.950066
38	18	-0.33	0.0739	0.795536	0.30539	0.380035	514	0.0191197	1.05256	38	HUMAN	Q00610|P53675	Clathrin heavy chain 1	-1.3958	0.950066
8	3	-0.331	0.0729	0.794985	0.301328	0.381582	503	0.0192458	1.05183	8	HUMAN	P01130	Low-density lipoprotein receptor	-1.38993	0.950725
6	4	-0.331	0.0729	0.794985	0.301328	0.381582	504	0.0192343	1.05183	6	HUMAN	P48723	Heat shock 70 kDa protein 13	-1.38993	0.950725
4	4	-0.331	0.0729	0.794985	0.301328	0.381582	505	0.0192228	1.05183	4	HUMAN	Q9UKV3	Apoptotic chromatin condensation inducer in the nucleus	-1.38993	0.950725
10	5	-0.331	0.0729	0.794985	0.301328	0.381582	506	0.0192114	1.05183	10	HUMAN	O95816	BAG family molecular chaperone regulator 2	-1.38993	0.950725
11	6	-0.331	0.0729	0.794985	0.301328	0.381582	507	0.0191999	1.05183	11	HUMAN	P54136	Arginine--tRNA ligase, cytoplasmic	-1.38993	0.950725
36	11	-0.331	0.0729	0.794985	0.301328	0.381582	508	0.0191884	1.05183	36	HUMAN	P12429	Annexin A3	-1.38993	0.950725
5	2	-0.332	0.0719	0.794434	0.297266	0.383132	497	0.0193145	1.0511	5	HUMAN	P06132	Uroporphyrinogen decarboxylase	-1.38409	0.951384
2	2	-0.332	0.0719	0.794434	0.297266	0.383132	498	0.0193031	1.0511	2	HUMAN	P46926|Q8TDQ7	Glucosamine-6-phosphate isomerase 1	-1.38409	0.951384
2	2	-0.332	0.0719	0.794434	0.297266	0.383132	499	0.0192916	1.0511	2	HUMAN	P49750	YLP motif-containing protein 1	-1.38409	0.951384
10	7	-0.332	0.0719	0.794434	0.297266	0.383132	500	0.0192801	1.0511	10	HUMAN	P28331	NADH-ubiquinone oxidoreductase 75 kDa subunit, mitochondrial	-1.38409	0.951384
3	2	-0.333	0.0709	0.793884	0.293205	0.384683	493	0.0193604	1.05037	3	HUMAN	Q16630	Cleavage and polyadenylation specificity factor subunit 6	-1.37826	0.952044
13	6	-0.333	0.0709	0.793884	0.293205	0.384683	494	0.0193489	1.05037	13	HUMAN	P46777	60S ribosomal protein L5	-1.37826	0.952044
13	6	-0.334	0.0699	0.793334	0.289143	0.386236	491	0.0193833	1.04964	13	HUMAN	O60506	Heterogeneous nuclear ribonucleoprotein Q	-1.37245	0.952704
19	14	-0.335	0.0689	0.792784	0.285081	0.387791	483	0.019475	1.04892	19	HUMAN	Q14152	Eukaryotic translation initiation factor 3 subunit A	-1.36665	0.953365
2	2	-0.336	0.0679	0.792235	0.281019	0.389348	471	0.0196126	1.04819	2	HUMAN	P46379	Large proline-rich protein BAG6	-1.36087	0.954026
3	3	-0.336	0.0679	0.792235	0.281019	0.389348	472	0.0196011	1.04819	3	HUMAN	Q8N3D4	EH domain-binding protein 1-like protein 1	-1.36087	0.954026
3	3	-0.336	0.0679	0.792235	0.281019	0.389348	473	0.0195896	1.04819	3	HUMAN	P62191	26S protease regulatory subunit 4	-1.36087	0.954026
6	4	-0.336	0.0679	0.792235	0.281019	0.389348	474	0.0195782	1.04819	6	HUMAN	P23526	Adenosylhomocysteinase	-1.36087	0.954026
10	8	-0.336	0.0679	0.792235	0.281019	0.389348	475	0.0195667	1.04819	10	HUMAN	Q9H2M9	Rab3 GTPase-activating protein non-catalytic subunit	-1.36087	0.954026
8	2	-0.337	0.0669	0.791686	0.276958	0.390906	463	0.0197043	1.04746	8	HUMAN	O00487	26S proteasome non-ATPase regulatory subunit 14	-1.35511	0.954687
3	2	-0.337	0.0669	0.791686	0.276958	0.390906	464	0.0196928	1.04746	3	HUMAN	Q9UBQ0	Vacuolar protein sorting-associated protein 29	-1.35511	0.954687
6	3	-0.337	0.0669	0.791686	0.276958	0.390906	465	0.0196813	1.04746	6	HUMAN	P23258|Q9NRH3	Tubulin gamma-1 chain	-1.35511	0.954687
6	3	-0.337	0.0669	0.791686	0.276958	0.390906	466	0.0196699	1.04746	6	HUMAN	P25786	Proteasome subunit alpha type-1	-1.35511	0.954687
17	3	-0.337	0.0669	0.791686	0.276958	0.390906	467	0.0196584	1.04746	17	HUMAN	P40429|Q6NVV1	60S ribosomal protein L13a	-1.35511	0.954687
8	5	-0.337	0.0669	0.791686	0.276958	0.390906	468	0.019647	1.04746	8	HUMAN	O95140	Mitofusin-2	-1.35511	0.954687
4	3	-0.338	0.0659	0.791137	0.272896	0.392467	455	0.019796	1.04674	4	HUMAN	Q9NR45	Sialic acid synthase	-1.34936	0.955349
3	2	-0.339	0.0649	0.790589	0.268834	0.394029	450	0.0198533	1.04601	3	HUMAN	Q99598	Translin-associated protein X	-1.34363	0.956012
2	2	-0.339	0.0649	0.790589	0.268834	0.394029	451	0.0198418	1.04601	2	HUMAN	Q96IJ6	Mannose-1-phosphate guanyltransferase alpha	-1.34363	0.956012
3	3	-0.339	0.0649	0.790589	0.268834	0.394029	452	0.0198304	1.04601	3	HUMAN	Q13438	Protein OS-9	-1.34363	0.956012
2	2	-0.34	0.0639	0.790041	0.264773	0.395592	443	0.0199335	1.04529	2	HUMAN	O75616	GTPase Era, mitochondrial	-1.33791	0.956674
3	2	-0.34	0.0639	0.790041	0.264773	0.395592	444	0.0199221	1.04529	3	HUMAN	P49354	Protein farnesyltransferase/geranylgeranyltransferase type-1 subunit alpha	-1.33791	0.956674
7	3	-0.34	0.0639	0.790041	0.264773	0.395592	445	0.0199106	1.04529	7	HUMAN	Q9UBM7	7-dehydrocholesterol reductase	-1.33791	0.956674
2	2	-0.341	0.0629	0.789494	0.260711	0.397158	439	0.0199794	1.04456	2	HUMAN	O14949	Cytochrome b-c1 complex subunit 8	-1.33222	0.957338
13	8	-0.341	0.0629	0.789494	0.260711	0.397158	440	0.0199679	1.04456	13	HUMAN	Q9H0B6	Kinesin light chain 2	-1.33222	0.957338
2	2	-0.342	0.0619	0.788947	0.256649	0.398725	433	0.0200481	1.04384	2	HUMAN	P57740	Nuclear pore complex protein Nup107	-1.32653	0.958002
3	3	-0.342	0.0619	0.788947	0.256649	0.398725	434	0.0200367	1.04384	3	HUMAN	P78356	Phosphatidylinositol 5-phosphate 4-kinase type-2 beta	-1.32653	0.958002
10	4	-0.342	0.0619	0.788947	0.256649	0.398725	435	0.0200252	1.04384	10	HUMAN	P60660	Myosin light polypeptide 6	-1.32653	0.958002
34	14	-0.342	0.0619	0.788947	0.256649	0.398725	436	0.0200138	1.04384	34	HUMAN	P20073	Annexin A7	-1.32653	0.958002
4	2	-0.343	0.0609	0.7884	0.252587	0.400294	426	0.0201284	1.04312	4	HUMAN	Q9Y3A6	Transmembrane emp24 domain-containing protein 5	-1.32087	0.958666
3	2	-0.343	0.0609	0.7884	0.252587	0.400294	427	0.0201169	1.04312	3	HUMAN	P46779	60S ribosomal protein L28	-1.32087	0.958666
2	2	-0.343	0.0609	0.7884	0.252587	0.400294	428	0.0201055	1.04312	2	HUMAN	A5PLN9	UPF0533 protein C5orf44	-1.32087	0.958666
2	2	-0.343	0.0609	0.7884	0.252587	0.400294	429	0.020094	1.04312	2	HUMAN	Q12872	Splicing factor, suppressor of white-apricot homolog	-1.32087	0.958666
4	3	-0.343	0.0609	0.7884	0.252587	0.400294	430	0.0200825	1.04312	4	HUMAN	Q9H9P8	L-2-hydroxyglutarate dehydrogenase, mitochondrial	-1.32087	0.958666
5	3	-0.344	0.0599	0.787854	0.248526	0.401864	420	0.0201972	1.04239	5	HUMAN	Q96KP4	Cytosolic non-specific dipeptidase	-1.31522	0.959331
15	8	-0.344	0.0599	0.787854	0.248526	0.401864	421	0.0201857	1.04239	15	HUMAN	Q5T9A4	ATPase family AAA domain-containing protein 3B	-1.31522	0.959331
7	2	-0.345	0.0589	0.787308	0.244464	0.403436	414	0.0202659	1.04167	7	HUMAN	Q9NX40	OCIA domain-containing protein 1	-1.30959	0.959996
12	5	-0.345	0.0589	0.787308	0.244464	0.403436	415	0.0202545	1.04167	12	HUMAN	Q14103	Heterogeneous nuclear ribonucleoprotein D0	-1.30959	0.959996
7	6	-0.345	0.0589	0.787308	0.244464	0.403436	416	0.020243	1.04167	7	HUMAN	O00429	Dynamin-1-like protein	-1.30959	0.959996
10	9	-0.345	0.0589	0.787308	0.244464	0.403436	417	0.0202315	1.04167	10	HUMAN	Q14573	Inositol 1,4,5-trisphosphate receptor type 3	-1.30959	0.959996
3	2	-0.346	0.0579	0.786762	0.240402	0.405009	406	0.0203576	1.04095	3	HUMAN	Q16204	Coiled-coil domain-containing protein 6	-1.30397	0.960661
3	3	-0.346	0.0579	0.786762	0.240402	0.405009	407	0.0203462	1.04095	3	HUMAN	A6NL28	Putative tropomyosin alpha-3 chain-like protein	-1.30397	0.960661
4	3	-0.346	0.0579	0.786762	0.240402	0.405009	408	0.0203347	1.04095	4	HUMAN	Q9BZJ0	Crooked neck-like protein 1	-1.30397	0.960661
14	5	-0.346	0.0579	0.786762	0.240402	0.405009	409	0.0203232	1.04095	14	HUMAN	P07954	Fumarate hydratase, mitochondrial	-1.30397	0.960661
8	7	-0.346	0.0579	0.786762	0.240402	0.405009	410	0.0203118	1.04095	8	HUMAN	Q9NYF8	Bcl-2-associated transcription factor 1	-1.30397	0.960661
24	10	-0.346	0.0579	0.786762	0.240402	0.405009	411	0.0203003	1.04095	24	HUMAN	Q9NVI7|Q5T2N8	ATPase family AAA domain-containing protein 3A	-1.30397	0.960661
14	11	-0.346	0.0579	0.786762	0.240402	0.405009	412	0.0202889	1.04095	14	HUMAN	Q14789	Golgin subfamily B member 1	-1.30397	0.960661
6	3	-0.347	0.0569	0.786217	0.23634	0.406584	402	0.0204035	1.04023	6	HUMAN	P56381	ATP synthase subunit epsilon, mitochondrial	-1.29837	0.961328
3	2	-0.348	0.0559	0.785673	0.232279	0.408161	397	0.0204608	1.03951	3	HUMAN	Q9Y2G3	Probable phospholipid-transporting ATPase IF	-1.29279	0.961994
10	6	-0.348	0.0559	0.785673	0.232279	0.408161	398	0.0204493	1.03951	10	HUMAN	P38117	Electron transfer flavoprotein subunit beta	-1.29279	0.961994
14	8	-0.348	0.0559	0.785673	0.232279	0.408161	399	0.0204379	1.03951	14	HUMAN	Q9Y4K0	Lysyl oxidase homolog 2	-1.29279	0.961994
5	2	-0.349	0.0549	0.785128	0.228217	0.409739	388	0.020564	1.03879	5	HUMAN	P01111	GTPase NRas	-1.28722	0.962661
6	3	-0.349	0.0549	0.785128	0.228217	0.409739	389	0.0205525	1.03879	6	HUMAN	P49736	DNA replication licensing factor MCM2	-1.28722	0.962661
11	4	-0.349	0.0549	0.785128	0.228217	0.409739	390	0.020541	1.03879	11	HUMAN	Q96BM9	ADP-ribosylation factor-like protein 8A	-1.28722	0.962661
9	5	-0.349	0.0549	0.785128	0.228217	0.409739	391	0.0205296	1.03879	9	HUMAN	Q8NC51	Plasminogen activator inhibitor 1 RNA-binding protein	-1.28722	0.962661
18	8	-0.349	0.0549	0.785128	0.228217	0.409739	392	0.0205181	1.03879	18	HUMAN	P19338	Nucleolin	-1.28722	0.962661
5	4	-0.35	0.0539	0.784584	0.224155	0.411318	383	0.0206213	1.03807	5	HUMAN	Q15029	116 kDa U5 small nuclear ribonucleoprotein component	-1.28167	0.963329
5	2	-0.351	0.0529	0.78404	0.220093	0.412899	374	0.0207244	1.03735	5	HUMAN	P18077	60S ribosomal protein L35a	-1.27614	0.963997
9	4	-0.351	0.0529	0.78404	0.220093	0.412899	375	0.020713	1.03735	9	HUMAN	P27635|Q96L21	60S ribosomal protein L10	-1.27614	0.963997
4	2	-0.352	0.0519	0.783497	0.216032	0.414482	368	0.0207932	1.03663	4	HUMAN	O43813	LanC-like protein 1	-1.27062	0.964665
4	2	-0.352	0.0519	0.783497	0.216032	0.414482	369	0.0207818	1.03663	4	HUMAN	P56556	NADH dehydrogenase [ubiquinone] 1 alpha subcomplex subunit 6	-1.27062	0.964665
4	3	-0.352	0.0519	0.783497	0.216032	0.414482	370	0.0207703	1.03663	4	HUMAN	Q13283	Ras GTPase-activating protein-binding protein 1	-1.27062	0.964665
24	3	-0.353	0.0509	0.782954	0.21197	0.416065	358	0.0209078	1.03591	24	HUMAN	P62805	Histone H4	-1.26512	0.965334
6	3	-0.353	0.0509	0.782954	0.21197	0.416065	359	0.0208964	1.03591	6	HUMAN	Q5SSJ5	Heterochromatin protein 1-binding protein 3	-1.26512	0.965334
4	3	-0.353	0.0509	0.782954	0.21197	0.416065	360	0.0208849	1.03591	4	HUMAN	Q96BQ5	Coiled-coil domain-containing protein 127	-1.26512	0.965334
6	4	-0.353	0.0509	0.782954	0.21197	0.416065	361	0.0208735	1.03591	6	HUMAN	P28370	Probable global transcription activator SNF2L1	-1.26512	0.965334
4	2	-0.355	0.0489	0.78187	0.203846	0.419237	340	0.0211142	1.03448	4	HUMAN	Q13951	Core-binding factor subunit beta	-1.25416	0.966673
3	2	-0.355	0.0489	0.78187	0.203846	0.419237	341	0.0211027	1.03448	3	HUMAN	Q9BQA9	Uncharacterized protein C17orf62	-1.25416	0.966673
10	4	-0.355	0.0489	0.78187	0.203846	0.419237	342	0.0210912	1.03448	10	HUMAN	Q13409	Cytoplasmic dynein 1 intermediate chain 2	-1.25416	0.966673
6	5	-0.355	0.0489	0.78187	0.203846	0.419237	343	0.0210798	1.03448	6	HUMAN	O94973	AP-2 complex subunit alpha-2	-1.25416	0.966673
13	5	-0.355	0.0489	0.78187	0.203846	0.419237	344	0.0210683	1.03448	13	HUMAN	P28074	Proteasome subunit beta type-5	-1.25416	0.966673
3	2	-0.356	0.0479	0.781328	0.199785	0.420824	330	0.0212288	1.03376	3	HUMAN	Q8NE71	ATP-binding cassette sub-family F member 1	-1.24871	0.967343
4	3	-0.356	0.0479	0.781328	0.199785	0.420824	331	0.0212173	1.03376	4	HUMAN	Q13085	Acetyl-CoA carboxylase 1	-1.24871	0.967343
3	3	-0.356	0.0479	0.781328	0.199785	0.420824	332	0.0212059	1.03376	3	HUMAN	Q5VTR2	E3 ubiquitin-protein ligase BRE1A	-1.24871	0.967343
18	9	-0.356	0.0479	0.781328	0.199785	0.420824	333	0.0211944	1.03376	18	HUMAN	P49411	Elongation factor Tu, mitochondrial	-1.24871	0.967343
3	2	-0.357	0.0469	0.780786	0.195723	0.422413	321	0.021332	1.03304	3	HUMAN	Q9NQP4	Prefoldin subunit 4	-1.24327	0.968014
3	3	-0.357	0.0469	0.780786	0.195723	0.422413	322	0.0213205	1.03304	3	HUMAN	Q14157	Ubiquitin-associated protein 2-like	-1.24327	0.968014
10	4	-0.357	0.0469	0.780786	0.195723	0.422413	323	0.021309	1.03304	10	HUMAN	O75521	Enoyl-CoA delta isomerase 2, mitochondrial	-1.24327	0.968014
6	4	-0.357	0.0469	0.780786	0.195723	0.422413	324	0.0212976	1.03304	6	HUMAN	O94760	N(G),N(G)-dimethylarginine dimethylaminohydrolase 1	-1.24327	0.968014
17	6	-0.358	0.0459	0.780245	0.191661	0.424004	316	0.0213893	1.03233	17	HUMAN	P63244	Guanine nucleotide-binding protein subunit beta-2-like 1	-1.23785	0.968685
12	7	-0.358	0.0459	0.780245	0.191661	0.424004	317	0.0213778	1.03233	12	HUMAN	Q8N766	Uncharacterized protein KIAA0090	-1.23785	0.968685
2	2	-0.359	0.0449	0.779705	0.1876	0.425595	310	0.021458	1.03161	2	HUMAN	Q13492	Phosphatidylinositol-binding clathrin assembly protein	-1.23245	0.969357
3	2	-0.359	0.0449	0.779705	0.1876	0.425595	311	0.0214466	1.03161	3	HUMAN	Q13459	Unconventional myosin-IXb	-1.23245	0.969357
3	3	-0.359	0.0449	0.779705	0.1876	0.425595	312	0.0214351	1.03161	3	HUMAN	P45973	Chromobox protein homolog 5	-1.23245	0.969357
7	6	-0.359	0.0449	0.779705	0.1876	0.425595	313	0.0214237	1.03161	7	HUMAN	Q9H089	Large subunit GTPase 1 homolog	-1.23245	0.969357
7	3	-0.36	0.0439	0.779165	0.183538	0.427188	308	0.021481	1.0309	7	HUMAN	P61254|Q9UNX3	60S ribosomal protein L26	-1.22706	0.970029
8	2	-0.361	0.0429	0.778625	0.179476	0.428782	299	0.0215841	1.03018	8	HUMAN	Q9P2X0	Dolichol-phosphate mannosyltransferase subunit 3	-1.22168	0.970702
2	2	-0.361	0.0429	0.778625	0.179476	0.428782	300	0.0215727	1.03018	2	HUMAN	Q9UKG1	DCC-interacting protein 13-alpha	-1.22168	0.970702
3	3	-0.361	0.0429	0.778625	0.179476	0.428782	301	0.0215612	1.03018	3	HUMAN	Q96RU3	Formin-binding protein 1	-1.22168	0.970702
13	5	-0.361	0.0429	0.778625	0.179476	0.428782	302	0.0215497	1.03018	13	HUMAN	Q8TDY2	RB1-inducible coiled-coil protein 1	-1.22168	0.970702
2	2	-0.362	0.0419	0.778085	0.175414	0.430377	290	0.0216873	1.02947	2	HUMAN	Q8WZA9	Immunity-related GTPase family Q protein	-1.21633	0.971375
10	3	-0.362	0.0419	0.778085	0.175414	0.430377	291	0.0216758	1.02947	10	HUMAN	P23919	Thymidylate kinase	-1.21633	0.971375
6	4	-0.362	0.0419	0.778085	0.175414	0.430377	292	0.0216644	1.02947	6	HUMAN	P50914	60S ribosomal protein L14	-1.21633	0.971375
5	4	-0.362	0.0419	0.778085	0.175414	0.430377	293	0.0216529	1.02947	5	HUMAN	Q9UPU5	Ubiquitin carboxyl-terminal hydrolase 24	-1.21633	0.971375
17	6	-0.362	0.0419	0.778085	0.175414	0.430377	294	0.0216414	1.02947	17	HUMAN	P61247	40S ribosomal protein S3a	-1.21633	0.971375
15	10	-0.362	0.0419	0.778085	0.175414	0.430377	295	0.02163	1.02947	15	HUMAN	Q8WUM4	Programmed cell death 6-interacting protein	-1.21633	0.971375
3	2	-0.363	0.0409	0.777546	0.171353	0.431973	278	0.0218249	1.02876	3	HUMAN	Q9Y3U8	60S ribosomal protein L36	-1.21099	0.972048
3	2	-0.363	0.0409	0.777546	0.171353	0.431973	279	0.0218134	1.02876	3	HUMAN	P32969	60S ribosomal protein L9	-1.21099	0.972048
2	2	-0.363	0.0409	0.777546	0.171353	0.431973	280	0.0218019	1.02876	2	HUMAN	Q9UFW8	CGG triplet repeat-binding protein 1	-1.21099	0.972048
3	3	-0.363	0.0409	0.777546	0.171353	0.431973	281	0.0217905	1.02876	3	HUMAN	Q5SW79	Centrosomal protein of 170 kDa	-1.21099	0.972048
3	2	-0.364	0.0399	0.777007	0.167291	0.433571	274	0.0218707	1.02804	3	HUMAN	Q9Y6C9	Mitochondrial carrier homolog 2	-1.20566	0.972722
2	2	-0.364	0.0399	0.777007	0.167291	0.433571	275	0.0218592	1.02804	2	HUMAN	Q14C86	GTPase-activating protein and VPS9 domain-containing protein 1	-1.20566	0.972722
12	10	-0.364	0.0399	0.777007	0.167291	0.433571	276	0.0218478	1.02804	12	HUMAN	P50570|Q9UQ16|Q05193	Dynamin-2	-1.20566	0.972722
5	2	-0.365	0.0389	0.776469	0.163229	0.435169	267	0.0219509	1.02733	5	HUMAN	P61158	Actin-related protein 3	-1.20035	0.973397
4	2	-0.365	0.0389	0.776469	0.163229	0.435169	268	0.0219395	1.02733	4	HUMAN	Q9H910	Hematological and neurological expressed 1-like protein	-1.20035	0.973397
3	2	-0.365	0.0389	0.776469	0.163229	0.435169	269	0.021928	1.02733	3	HUMAN	Q9NX58	Cell growth-regulating nucleolar protein	-1.20035	0.973397
7	6	-0.365	0.0389	0.776469	0.163229	0.435169	270	0.0219166	1.02733	7	HUMAN	Q9UHB9	Signal recognition particle 68 kDa protein	-1.20035	0.973397
18	11	-0.365	0.0389	0.776469	0.163229	0.435169	271	0.0219051	1.02733	18	HUMAN	Q02218|Q9ULD0	2-oxoglutarate dehydrogenase, mitochondrial	-1.20035	0.973397
40	26	-0.365	0.0389	0.776469	0.163229	0.435169	272	0.0218936	1.02733	40	HUMAN	Q9UPN3|Q5T7N2	Microtubule-actin cross-linking factor 1, isoforms 1/2/3/5	-1.20035	0.973397
3	2	-0.366	0.0379	0.775931	0.159167	0.436769	260	0.0220312	1.02662	3	HUMAN	P48163	NADP-dependent malic enzyme	-1.19506	0.974072
4	3	-0.366	0.0379	0.775931	0.159167	0.436769	261	0.0220197	1.02662	4	HUMAN	P61586	Transforming protein RhoA	-1.19506	0.974072
5	4	-0.366	0.0379	0.775931	0.159167	0.436769	262	0.0220083	1.02662	5	HUMAN	O75044|Q7Z6B7	SLIT-ROBO Rho GTPase-activating protein 2	-1.19506	0.974072
6	5	-0.366	0.0379	0.775931	0.159167	0.436769	263	0.0219968	1.02662	6	HUMAN	Q9Y371	Endophilin-B1	-1.19506	0.974072
8	8	-0.366	0.0379	0.775931	0.159167	0.436769	264	0.0219853	1.02662	8	HUMAN	O00571|O15523	ATP-dependent RNA helicase DDX3X	-1.19506	0.974072
7	3	-0.367	0.0369	0.775393	0.155106	0.438369	256	0.022077	1.02591	7	HUMAN	P63241	Eukaryotic translation initiation factor 5A-1	-1.18978	0.974747
15	5	-0.367	0.0369	0.775393	0.155106	0.438369	257	0.0220656	1.02591	15	HUMAN	O95716	Ras-related protein Rab-3D	-1.18978	0.974747
11	7	-0.367	0.0369	0.775393	0.155106	0.438369	258	0.0220541	1.02591	11	HUMAN	Q96TA2	ATP-dependent zinc metalloprotease YME1L1	-1.18978	0.974747
2	2	-0.368	0.0359	0.774856	0.151044	0.439971	252	0.0221229	1.0252	2	HUMAN	Q9Y6I9	Testis-expressed sequence 264 protein	-1.18452	0.975423
3	3	-0.369	0.0349	0.774319	0.146982	0.441573	247	0.0221802	1.02449	3	HUMAN	Q16851	UTP--glucose-1-phosphate uridylyltransferase	-1.17928	0.976099
12	9	-0.369	0.0349	0.774319	0.146982	0.441573	248	0.0221687	1.02449	12	HUMAN	P06756	Integrin alpha-V	-1.17928	0.976099
2	2	-0.37	0.0339	0.773782	0.14292	0.443177	243	0.022226	1.02378	2	HUMAN	Q9NXR1	Nuclear distribution protein nudE homolog 1	-1.17405	0.976776
2	2	-0.37	0.0339	0.773782	0.14292	0.443177	244	0.0222146	1.02378	2	HUMAN	Q6VEQ5|A8K0Z3|C4AMC7|A8MWX3|Q9NQA3	WAS protein family homolog 2	-1.17405	0.976776
4	2	-0.371	0.0329	0.773246	0.138859	0.444781	230	0.0223751	1.02307	4	HUMAN	Q99447	Ethanolamine-phosphate cytidylyltransferase	-1.16883	0.977454
2	2	-0.371	0.0329	0.773246	0.138859	0.444781	231	0.0223636	1.02307	2	HUMAN	Q14011	Cold-inducible RNA-binding protein	-1.16883	0.977454
2	2	-0.371	0.0329	0.773246	0.138859	0.444781	232	0.0223521	1.02307	2	HUMAN	P02686	Myelin basic protein	-1.16883	0.977454
3	3	-0.371	0.0329	0.773246	0.138859	0.444781	233	0.0223407	1.02307	3	HUMAN	O95292	Vesicle-associated membrane protein-associated protein B/C	-1.16883	0.977454
17	3	-0.371	0.0329	0.773246	0.138859	0.444781	234	0.0223292	1.02307	17	HUMAN	P09382	Galectin-1	-1.16883	0.977454
3	3	-0.371	0.0329	0.773246	0.138859	0.444781	235	0.0223177	1.02307	3	HUMAN	P39060	Collagen alpha-1(XVIII) chain	-1.16883	0.977454
4	3	-0.371	0.0329	0.773246	0.138859	0.444781	236	0.0223063	1.02307	4	HUMAN	P15880	40S ribosomal protein S2	-1.16883	0.977454
3	3	-0.371	0.0329	0.773246	0.138859	0.444781	237	0.0222948	1.02307	3	HUMAN	Q86X76	Nitrilase homolog 1	-1.16883	0.977454
3	3	-0.371	0.0329	0.773246	0.138859	0.444781	238	0.0222834	1.02307	3	HUMAN	O60749	Sorting nexin-2	-1.16883	0.977454
9	6	-0.371	0.0329	0.773246	0.138859	0.444781	239	0.0222719	1.02307	9	HUMAN	P08243	Asparagine synthetase [glutamine-hydrolyzing]	-1.16883	0.977454
2	2	-0.372	0.0319	0.772711	0.134797	0.446386	219	0.0225011	1.02236	2	HUMAN	P48556	26S proteasome non-ATPase regulatory subunit 8	-1.16364	0.978131
2	2	-0.372	0.0319	0.772711	0.134797	0.446386	220	0.0224897	1.02236	2	HUMAN	O60934	Nibrin	-1.16364	0.978131
3	3	-0.372	0.0319	0.772711	0.134797	0.446386	221	0.0224782	1.02236	3	HUMAN	Q9NVJ2	ADP-ribosylation factor-like protein 8B	-1.16364	0.978131
8	4	-0.372	0.0319	0.772711	0.134797	0.446386	222	0.0224668	1.02236	8	HUMAN	P07686	Beta-hexosaminidase subunit beta	-1.16364	0.978131
5	4	-0.372	0.0319	0.772711	0.134797	0.446386	223	0.0224553	1.02236	5	HUMAN	Q9NWB6	Arginine and glutamate-rich protein 1	-1.16364	0.978131
5	5	-0.372	0.0319	0.772711	0.134797	0.446386	224	0.0224438	1.02236	5	HUMAN	Q16531	DNA damage-binding protein 1	-1.16364	0.978131
8	5	-0.372	0.0319	0.772711	0.134797	0.446386	225	0.0224324	1.02236	8	HUMAN	P53801	Pituitary tumor-transforming gene 1 protein-interacting protein	-1.16364	0.978131
4	2	-0.373	0.0309	0.772175	0.130735	0.447992	214	0.0225585	1.02165	4	HUMAN	Q9NPD3	Exosome complex component RRP41	-1.15845	0.978809
6	2	-0.373	0.0309	0.772175	0.130735	0.447992	215	0.022547	1.02165	6	HUMAN	P18754	Regulator of chromosome condensation	-1.15845	0.978809
9	4	-0.373	0.0309	0.772175	0.130735	0.447992	216	0.0225355	1.02165	9	HUMAN	Q15717	ELAV-like protein 1	-1.15845	0.978809
5	2	-0.374	0.0299	0.77164	0.126673	0.449599	206	0.0226502	1.02094	5	HUMAN	P40121	Macrophage-capping protein	-1.15329	0.979488
2	2	-0.374	0.0299	0.77164	0.126673	0.449599	207	0.0226387	1.02094	2	HUMAN	Q6XZF7	Dynamin-binding protein	-1.15329	0.979488
20	5	-0.374	0.0299	0.77164	0.126673	0.449599	208	0.0226272	1.02094	20	HUMAN	P52565	Rho GDP-dissociation inhibitor 1	-1.15329	0.979488
7	5	-0.374	0.0299	0.77164	0.126673	0.449599	209	0.0226158	1.02094	7	HUMAN	P62195	26S protease regulatory subunit 8	-1.15329	0.979488
3	2	-0.375	0.0289	0.771105	0.122612	0.451207	203	0.0226845	1.02023	3	HUMAN	Q9BSH5	Haloacid dehalogenase-like hydrolase domain-containing protein 3	-1.14814	0.980167
6	5	-0.375	0.0289	0.771105	0.122612	0.451207	204	0.0226731	1.02023	6	HUMAN	Q14683	Structural maintenance of chromosomes protein 1A	-1.14814	0.980167
2	2	-0.376	0.0279	0.770571	0.11855	0.452816	196	0.0227648	1.01953	2	HUMAN	Q6PML9	Zinc transporter 9	-1.143	0.980847
3	3	-0.376	0.0279	0.770571	0.11855	0.452816	197	0.0227533	1.01953	3	HUMAN	Q8WUK0	Protein-tyrosine phosphatase mitochondrial 1	-1.143	0.980847
3	2	-0.377	0.0269	0.770037	0.114488	0.454425	191	0.0228221	1.01882	3	HUMAN	Q86XP3	ATP-dependent RNA helicase DDX42	-1.13788	0.981527
6	4	-0.378	0.0259	0.769504	0.110426	0.456036	186	0.0228794	1.01811	6	HUMAN	P50851|Q8NFP9	Lipopolysaccharide-responsive and beige-like anchor protein	-1.13278	0.982208
8	5	-0.378	0.0259	0.769504	0.110426	0.456036	187	0.022868	1.01811	8	HUMAN	Q9H2G2	STE20-like serine/threonine-protein kinase	-1.13278	0.982208
10	6	-0.378	0.0259	0.769504	0.110426	0.456036	188	0.0228565	1.01811	10	HUMAN	P35606	Coatomer subunit beta'	-1.13278	0.982208
2	2	-0.379	0.0249	0.76897	0.106365	0.457646	179	0.0229597	1.01741	2	HUMAN	P32455	Interferon-induced guanylate-binding protein 1	-1.12769	0.982889
5	3	-0.379	0.0249	0.76897	0.106365	0.457646	180	0.0229482	1.01741	5	HUMAN	P08865	40S ribosomal protein SA	-1.12769	0.982889
3	3	-0.379	0.0249	0.76897	0.106365	0.457646	181	0.0229367	1.01741	3	HUMAN	Q9H269	Vacuolar protein sorting-associated protein 16 homolog	-1.12769	0.982889
4	3	-0.379	0.0249	0.76897	0.106365	0.457646	182	0.0229253	1.01741	4	HUMAN	Q92615	La-related protein 4B	-1.12769	0.982889
3	3	-0.38	0.0239	0.768438	0.102303	0.459258	171	0.0230514	1.0167	3	HUMAN	Q9UBC2	Epidermal growth factor receptor substrate 15-like 1	-1.12262	0.98357
4	4	-0.38	0.0239	0.768438	0.102303	0.459258	172	0.0230399	1.0167	4	HUMAN	Q9Y3B3	Transmembrane emp24 domain-containing protein 7	-1.12262	0.98357
5	5	-0.38	0.0239	0.768438	0.102303	0.459258	173	0.0230284	1.0167	5	HUMAN	P84098	60S ribosomal protein L19	-1.12262	0.98357
2	2	-0.381	0.0229	0.767905	0.0982413	0.46087	158	0.0232004	1.016	2	HUMAN	Q9UHD2	Serine/threonine-protein kinase TBK1	-1.11757	0.984252
2	2	-0.381	0.0229	0.767905	0.0982413	0.46087	159	0.0231889	1.016	2	HUMAN	Q96RL7	Vacuolar protein sorting-associated protein 13A	-1.11757	0.984252
6	3	-0.381	0.0229	0.767905	0.0982413	0.46087	160	0.0231774	1.016	6	HUMAN	P82979	SAP domain-containing ribonucleoprotein	-1.11757	0.984252
4	3	-0.381	0.0229	0.767905	0.0982413	0.46087	161	0.023166	1.016	4	HUMAN	Q12874	Splicing factor 3A subunit 3	-1.11757	0.984252
15	4	-0.381	0.0229	0.767905	0.0982413	0.46087	162	0.0231545	1.016	15	HUMAN	Q99733	Nucleosome assembly protein 1-like 4	-1.11757	0.984252
10	9	-0.381	0.0229	0.767905	0.0982413	0.46087	163	0.0231431	1.016	10	HUMAN	Q9BXJ9	N-alpha-acetyltransferase 15, NatA auxiliary subunit	-1.11757	0.984252
19	17	-0.381	0.0229	0.767905	0.0982413	0.46087	164	0.0231316	1.016	19	HUMAN	P46939	Utrophin	-1.11757	0.984252
5	2	-0.382	0.0219	0.767373	0.0941795	0.462483	148	0.023315	1.0153	5	HUMAN	P11279	Lysosome-associated membrane glycoprotein 1	-1.11253	0.984935
6	3	-0.382	0.0219	0.767373	0.0941795	0.462483	149	0.0233035	1.0153	6	HUMAN	P30740	Leukocyte elastase inhibitor	-1.11253	0.984935
5	4	-0.382	0.0219	0.767373	0.0941795	0.462483	150	0.0232921	1.0153	5	HUMAN	Q16822	Phosphoenolpyruvate carboxykinase [GTP], mitochondrial	-1.11253	0.984935
3	2	-0.383	0.0209	0.766841	0.0901178	0.464097	144	0.0233608	1.01459	3	HUMAN	O60256	Phosphoribosyl pyrophosphate synthase-associated protein 2	-1.1075	0.985618
3	3	-0.383	0.0209	0.766841	0.0901178	0.464097	145	0.0233494	1.01459	3	HUMAN	Q9H6S3	Epidermal growth factor receptor kinase substrate 8-like protein 2	-1.1075	0.985618
4	4	-0.383	0.0209	0.766841	0.0901178	0.464097	146	0.0233379	1.01459	4	HUMAN	P04114	Apolipoprotein B-100	-1.1075	0.985618
10	7	-0.383	0.0209	0.766841	0.0901178	0.464097	147	0.0233265	1.01459	10	HUMAN	P53618	Coatomer subunit beta	-1.1075	0.985618
2	2	-0.384	0.0199	0.76631	0.0860561	0.465711	135	0.023464	1.01389	2	HUMAN	Q8TF05	Serine/threonine-protein phosphatase 4 regulatory subunit 1	-1.10249	0.986301
2	2	-0.384	0.0199	0.76631	0.0860561	0.465711	136	0.0234525	1.01389	2	HUMAN	Q96CS7	Pleckstrin homology domain-containing family B member 2	-1.10249	0.986301
6	4	-0.384	0.0199	0.76631	0.0860561	0.465711	137	0.0234411	1.01389	6	HUMAN	P49023	Paxillin	-1.10249	0.986301
3	2	-0.385	0.0189	0.765779	0.0819943	0.467326	131	0.0235099	1.01319	3	HUMAN	P17812	CTP synthase 1	-1.0975	0.986985
4	3	-0.385	0.0189	0.765779	0.0819943	0.467326	132	0.0234984	1.01319	4	HUMAN	A0AVT1	Ubiquitin-like modifier-activating enzyme 6	-1.0975	0.986985
15	6	-0.385	0.0189	0.765779	0.0819943	0.467326	133	0.0234869	1.01319	15	HUMAN	P23396	40S ribosomal protein S3	-1.0975	0.986985
2	2	-0.386	0.0179	0.765248	0.0779326	0.468941	125	0.0235786	1.01248	2	HUMAN	O15484	Calpain-5	-1.09252	0.987669
10	2	-0.387	0.0169	0.764718	0.0738708	0.470557	118	0.0236589	1.01178	10	HUMAN	P19404	NADH dehydrogenase [ubiquinone] flavoprotein 2, mitochondrial	-1.08756	0.988354
4	2	-0.387	0.0169	0.764718	0.0738708	0.470557	119	0.0236474	1.01178	4	HUMAN	P08294	Extracellular superoxide dismutase [Cu-Zn]	-1.08756	0.988354
3	3	-0.387	0.0169	0.764718	0.0738708	0.470557	120	0.0236359	1.01178	3	HUMAN	P83111	Serine beta-lactamase-like protein LACTB, mitochondrial	-1.08756	0.988354
13	7	-0.387	0.0169	0.764718	0.0738708	0.470557	121	0.0236245	1.01178	13	HUMAN	P13639	Elongation factor 2	-1.08756	0.988354
15	8	-0.388	0.0159	0.764188	0.0698091	0.472173	113	0.0237162	1.01108	15	HUMAN	P02786	Transferrin receptor protein 1	-1.08261	0.989039
6	5	-0.389	0.0149	0.763659	0.0657474	0.473789	111	0.0237391	1.01038	6	HUMAN	Q99961|Q99962	Endophilin-A2	-1.07768	0.989725
4	2	-0.39	0.0139	0.76313	0.0616856	0.475407	106	0.0237964	1.00968	4	HUMAN	P21399	Cytoplasmic aconitate hydratase	-1.07277	0.990412
3	3	-0.39	0.0139	0.76313	0.0616856	0.475407	107	0.023785	1.00968	3	HUMAN	Q86V48	Leucine zipper protein 1	-1.07277	0.990412
13	4	-0.39	0.0139	0.76313	0.0616856	0.475407	108	0.0237735	1.00968	13	HUMAN	Q16695|P68431|Q71DI3|P84243	Histone H3.1t	-1.07277	0.990412
4	2	-0.391	0.0129	0.762601	0.0576239	0.477024	101	0.0238537	1.00898	4	HUMAN	Q6GMV3	Putative peptidyl-tRNA hydrolase PTRHD1	-1.06787	0.991098
2	2	-0.391	0.0129	0.762601	0.0576239	0.477024	102	0.0238423	1.00898	2	HUMAN	Q5JPH6	Probable glutamate--tRNA ligase, mitochondrial	-1.06787	0.991098
2	2	-0.391	0.0129	0.762601	0.0576239	0.477024	103	0.0238308	1.00898	2	HUMAN	Q9NW64	Pre-mRNA-splicing factor RBM22	-1.06787	0.991098
3	2	-0.392	0.0119	0.762072	0.0535621	0.478642	94	0.023934	1.00828	3	HUMAN	Q15813	Tubulin-specific chaperone E	-1.06298	0.991785
6	2	-0.392	0.0119	0.762072	0.0535621	0.478642	95	0.0239225	1.00828	6	HUMAN	O75688	Protein phosphatase 1B	-1.06298	0.991785
9	4	-0.392	0.0119	0.762072	0.0535621	0.478642	96	0.023911	1.00828	9	HUMAN	P62070|P10301	Ras-related protein R-Ras2	-1.06298	0.991785
14	8	-0.392	0.0119	0.762072	0.0535621	0.478642	97	0.0238996	1.00828	14	HUMAN	Q96I99	Succinyl-CoA ligase [GDP-forming] subunit beta, mitochondrial	-1.06298	0.991785
4	4	-0.393	0.0109	0.761544	0.0495004	0.48026	87	0.0240142	1.00758	4	HUMAN	O75150	E3 ubiquitin-protein ligase BRE1B	-1.05811	0.992473
9	5	-0.393	0.0109	0.761544	0.0495004	0.48026	88	0.0240028	1.00758	9	HUMAN	Q14019	Coactosin-like protein	-1.05811	0.992473
11	5	-0.393	0.0109	0.761544	0.0495004	0.48026	89	0.0239913	1.00758	11	HUMAN	Q09028|Q16576	Histone-binding protein RBBP4	-1.05811	0.992473
2	2	-0.394	0.0099	0.761017	0.0454387	0.481879	76	0.0241403	1.00689	2	HUMAN	Q13418	Integrin-linked protein kinase	-1.05326	0.993161
2	2	-0.394	0.0099	0.761017	0.0454387	0.481879	77	0.0241288	1.00689	2	HUMAN	P49916	DNA ligase 3	-1.05326	0.993161
3	2	-0.394	0.0099	0.761017	0.0454387	0.481879	78	0.0241174	1.00689	3	HUMAN	Q9NZN4	EH domain-containing protein 2	-1.05326	0.993161
2	2	-0.394	0.0099	0.761017	0.0454387	0.481879	79	0.0241059	1.00689	2	HUMAN	Q9BW27	Nuclear pore complex protein Nup85	-1.05326	0.993161
3	3	-0.394	0.0099	0.761017	0.0454387	0.481879	80	0.0240945	1.00689	3	HUMAN	P48147	Prolyl endopeptidase	-1.05326	0.993161
16	4	-0.394	0.0099	0.761017	0.0454387	0.481879	81	0.024083	1.00689	16	HUMAN	O00116	Alkyldihydroxyacetonephosphate synthase, peroxisomal	-1.05326	0.993161
4	4	-0.394	0.0099	0.761017	0.0454387	0.481879	82	0.0240715	1.00689	4	HUMAN	P98194	Calcium-transporting ATPase type 2C member 1	-1.05326	0.993161
50	28	-0.394	0.0099	0.761017	0.0454387	0.481879	83	0.0240601	1.00689	50	HUMAN	Q01082	Spectrin beta chain, brain 1	-1.05326	0.993161
2	2	-0.395	0.0089	0.760489	0.0413769	0.483498	70	0.0242091	1.00619	2	HUMAN	Q01085	Nucleolysin TIAR	-1.04842	0.99385
2	2	-0.395	0.0089	0.760489	0.0413769	0.483498	71	0.0241976	1.00619	2	HUMAN	Q8IWA4	Mitofusin-1	-1.04842	0.99385
2	2	-0.395	0.0089	0.760489	0.0413769	0.483498	72	0.0241862	1.00619	2	HUMAN	Q6WCQ1	Myosin phosphatase Rho-interacting protein	-1.04842	0.99385
4	3	-0.395	0.0089	0.760489	0.0413769	0.483498	73	0.0241747	1.00619	4	HUMAN	Q9NR28	Diablo homolog, mitochondrial	-1.04842	0.99385
3	2	-0.396	0.0079	0.759962	0.0373152	0.485117	60	0.0243237	1.00549	3	HUMAN	Q96DB5	Regulator of microtubule dynamics protein 1	-1.0436	0.994539
4	3	-0.396	0.0079	0.759962	0.0373152	0.485117	61	0.0243122	1.00549	4	HUMAN	Q08257	Quinone oxidoreductase	-1.0436	0.994539
4	4	-0.396	0.0079	0.759962	0.0373152	0.485117	62	0.0243008	1.00549	4	HUMAN	O14974	Protein phosphatase 1 regulatory subunit 12A	-1.0436	0.994539
5	4	-0.396	0.0079	0.759962	0.0373152	0.485117	63	0.0242893	1.00549	5	HUMAN	O60610	Protein diaphanous homolog 1	-1.0436	0.994539
40	6	-0.396	0.0079	0.759962	0.0373152	0.485117	64	0.0242779	1.00549	40	HUMAN	P06576	ATP synthase subunit beta, mitochondrial	-1.0436	0.994539
3	2	-0.397	0.0069	0.759436	0.0332535	0.486736	55	0.024381	1.00479	3	HUMAN	Q92820	Gamma-glutamyl hydrolase	-1.03879	0.995229
3	3	-0.397	0.0069	0.759436	0.0332535	0.486736	56	0.0243696	1.00479	3	HUMAN	Q8IY17	Neuropathy target esterase	-1.03879	0.995229
4	2	-0.398	0.0059	0.75891	0.0291917	0.488356	49	0.0244498	1.0041	4	HUMAN	P63173	60S ribosomal protein L38	-1.034	0.995919
17	4	-0.398	0.0059	0.75891	0.0291917	0.488356	50	0.0244383	1.0041	17	HUMAN	Q13765	Nascent polypeptide-associated complex subunit alpha	-1.034	0.995919
8	4	-0.398	0.0059	0.75891	0.0291917	0.488356	51	0.0244269	1.0041	8	HUMAN	P53041	Serine/threonine-protein phosphatase 5	-1.034	0.995919
4	2	-0.399	0.0049	0.758384	0.02513	0.489976	45	0.0244956	1.0034	4	HUMAN	Q8TBA6	Golgin subfamily A member 5	-1.02922	0.996609
3	2	-0.399	0.0049	0.758384	0.02513	0.489976	46	0.0244842	1.0034	3	HUMAN	Q2TAZ0	Autophagy-related protein 2 homolog A	-1.02922	0.996609
6	4	-0.399	0.0049	0.758384	0.02513	0.489976	47	0.0244727	1.0034	6	HUMAN	P21397	Amine oxidase [flavin-containing] A	-1.02922	0.996609
8	4	-0.4	0.0039	0.757858	0.0210682	0.491596	42	0.02453	1.00271	8	HUMAN	Q92499	ATP-dependent RNA helicase DDX1	-1.02446	0.9973
5	2	-0.401	0.0029	0.757333	0.0170065	0.493216	34	0.0246217	1.00201	5	HUMAN	Q12841	Follistatin-related protein 1	-1.01971	0.997992
3	2	-0.401	0.0029	0.757333	0.0170065	0.493216	35	0.0246103	1.00201	3	HUMAN	Q00653	Nuclear factor NF-kappa-B p100 subunit	-1.01971	0.997992
5	3	-0.401	0.0029	0.757333	0.0170065	0.493216	36	0.0245988	1.00201	5	HUMAN	Q9BYD1	39S ribosomal protein L13, mitochondrial	-1.01971	0.997992
7	5	-0.401	0.0029	0.757333	0.0170065	0.493216	37	0.0245873	1.00201	7	HUMAN	P31947|O95294	14-3-3 protein sigma	-1.01971	0.997992
6	6	-0.401	0.0029	0.757333	0.0170065	0.493216	38	0.0245759	1.00201	6	HUMAN	Q9Y5K6	CD2-associated protein	-1.01971	0.997992
2	2	-0.402	0.0019	0.756808	0.0129448	0.494836	26	0.0247134	1.00132	2	HUMAN	Q16610	Extracellular matrix protein 1	-1.01498	0.998684
2	2	-0.402	0.0019	0.756808	0.0129448	0.494836	27	0.024702	1.00132	2	HUMAN	A5D8V7	Coiled-coil domain-containing protein 151	-1.01498	0.998684
9	5	-0.402	0.0019	0.756808	0.0129448	0.494836	28	0.0246905	1.00132	9	HUMAN	Q99442	Translocation protein SEC62	-1.01498	0.998684
12	7	-0.402	0.0019	0.756808	0.0129448	0.494836	29	0.024679	1.00132	12	HUMAN	Q15046	Lysine--tRNA ligase	-1.01498	0.998684
11	9	-0.402	0.0019	0.756808	0.0129448	0.494836	30	0.0246676	1.00132	11	HUMAN	P12081	Histidine--tRNA ligase, cytoplasmic	-1.01498	0.998684
6	4	-0.403	0.0009	0.756284	0.00888302	0.496456	18	0.0248051	1.00062	6	HUMAN	O75923	Dysferlin	-1.01026	0.999376
4	4	-0.403	0.0009	0.756284	0.00888302	0.496456	19	0.0247937	1.00062	4	HUMAN	P33992	DNA replication licensing factor MCM5	-1.01026	0.999376
8	5	-0.403	0.0009	0.756284	0.00888302	0.496456	20	0.0247822	1.00062	9	HUMAN	O43865|Q96HN2	Putative adenosylhomocysteinase 2	-1.01026	0.999376
56	16	-0.403	0.0009	0.756284	0.00888302	0.496456	21	0.0247707	1.00062	56	HUMAN	P00367|P49448	Glutamate dehydrogenase 1, mitochondrial	-1.01026	0.999376
2	2	-0.404	-0.0001	0.75576	0.00482128	0.498077	11	0.0248854	0.999931	2	HUMAN	O15305	Phosphomannomutase 2	-1.00556	1.00007
2	2	-0.404	-0.0001	0.75576	0.00482128	0.498077	12	0.0248739	0.999931	2	HUMAN	Q9Y5J6	Mitochondrial import inner membrane translocase subunit Tim9 B	-1.00556	1.00007
2	2	-0.404	-0.0001	0.75576	0.00482128	0.498077	13	0.0248624	0.999931	2	HUMAN	P62888	60S ribosomal protein L30	-1.00556	1.00007
6	3	-0.404	-0.0001	0.75576	0.00482128	0.498077	14	0.024851	0.999931	6	HUMAN	Q00688	Peptidyl-prolyl cis-trans isomerase FKBP3	-1.00556	1.00007
2	2	-0.405	-0.0011	0.755236	0.000759545	0.499697	1	0.025	0.999238	2	HUMAN	O43826	Glucose-6-phosphate translocase	-1.00087	1.00076
5	3	-0.405	-0.0011	0.755236	0.000759545	0.499697	2	0.0249885	0.999238	5	HUMAN	Q96C19|Q9BUP0	EF-hand domain-containing protein D2	-1.00087	1.00076
9	7	-0.405	-0.0011	0.755236	0.000759545	0.499697	3	0.0249771	0.999238	9	HUMAN	P47897	Glutamine--tRNA ligase	-1.00087	1.00076
13	9	-0.405	-0.0011	0.755236	0.000759545	0.499697	4	0.0249656	0.999238	13	HUMAN	Q8N1F7	Nuclear pore complex protein Nup93	-1.00087	1.00076
5	3	-0.406	-0.0021	0.754713	-0.00330219	0.498683	5	0.0249541	0.998545	5	HUMAN	Q9NRK6	ATP-binding cassette sub-family B member 10, mitochondrial	-1.00381	1.00146
17	5	-0.406	-0.0021	0.754713	-0.00330219	0.498683	6	0.0249427	0.998545	17	HUMAN	P61981	14-3-3 protein gamma	-1.00381	1.00146
11	5	-0.406	-0.0021	0.754713	-0.00330219	0.498683	7	0.0249312	0.998545	11	HUMAN	P14927	Cytochrome b-c1 complex subunit 7	-1.00381	1.00146
7	5	-0.406	-0.0021	0.754713	-0.00330219	0.498683	8	0.0249198	0.998545	7	HUMAN	Q96T51	RUN and FYVE domain-containing protein 1	-1.00381	1.00146
6	6	-0.406	-0.0021	0.754713	-0.00330219	0.498683	9	0.0249083	0.998545	6	HUMAN	Q14566	DNA replication licensing factor MCM6	-1.00381	1.00146
15	11	-0.406	-0.0021	0.754713	-0.00330219	0.498683	10	0.0248968	0.998545	15	HUMAN	P12270	Nucleoprotein TPR	-1.00381	1.00146
2	2	-0.407	-0.0031	0.75419	-0.00736393	0.497062	15	0.0248395	0.997854	2	HUMAN	Q05209	Tyrosine-protein phosphatase non-receptor type 12	-1.0085	1.00215
11	6	-0.407	-0.0031	0.75419	-0.00736393	0.497062	16	0.0248281	0.997854	11	HUMAN	Q9P2R7	Succinyl-CoA ligase [ADP-forming] subunit beta, mitochondrial	-1.0085	1.00215
15	7	-0.407	-0.0031	0.75419	-0.00736393	0.497062	17	0.0248166	0.997854	15	HUMAN	Q92841	Probable ATP-dependent RNA helicase DDX17	-1.0085	1.00215
2	2	-0.408	-0.0041	0.753667	-0.0114257	0.495442	22	0.0247593	0.997162	2	HUMAN	Q14839|Q8TDI0	Chromodomain-helicase-DNA-binding protein 4	-1.01321	1.00285
2	2	-0.408	-0.0041	0.753667	-0.0114257	0.495442	23	0.0247478	0.997162	2	HUMAN	Q29RF7	Sister chromatid cohesion protein PDS5 homolog A	-1.01321	1.00285
5	3	-0.408	-0.0041	0.753667	-0.0114257	0.495442	24	0.0247364	0.997162	5	HUMAN	Q9Y6W5	Wiskott-Aldrich syndrome protein family member 2	-1.01321	1.00285
155	59	-0.408	-0.0041	0.753667	-0.0114257	0.495442	25	0.0247249	0.997162	156	HUMAN	P35579|Q7Z406	Myosin-9	-1.01321	1.00285
9	2	-0.409	-0.0051	0.753145	-0.0154874	0.493822	31	0.0246561	0.996471	9	HUMAN	P10606	Cytochrome c oxidase subunit 5B, mitochondrial	-1.01794	1.00354
2	2	-0.409	-0.0051	0.753145	-0.0154874	0.493822	32	0.0246447	0.996471	2	HUMAN	P11766	Alcohol dehydrogenase class-3	-1.01794	1.00354
47	18	-0.409	-0.0051	0.753145	-0.0154874	0.493822	33	0.0246332	0.996471	47	HUMAN	P55072	Transitional endoplasmic reticulum ATPase	-1.01794	1.00354
3	2	-0.41	-0.0061	0.752623	-0.0195491	0.492202	39	0.0245644	0.995781	3	HUMAN	O43765	Small glutamine-rich tetratricopeptide repeat-containing protein alpha	-1.02268	1.00424
6	3	-0.41	-0.0061	0.752623	-0.0195491	0.492202	40	0.024553	0.995781	6	HUMAN	Q14677	Clathrin interactor 1	-1.02268	1.00424
5	4	-0.41	-0.0061	0.752623	-0.0195491	0.492202	41	0.0245415	0.995781	5	HUMAN	P49590	Probable histidine--tRNA ligase, mitochondrial	-1.02268	1.00424
2	2	-0.411	-0.0071	0.752102	-0.0236109	0.490581	43	0.0245186	0.995091	2	HUMAN	Q9BZH6	WD repeat-containing protein 11	-1.02744	1.00493
3	3	-0.411	-0.0071	0.752102	-0.0236109	0.490581	44	0.0245071	0.995091	3	HUMAN	Q9UGP8	Translocation protein SEC63 homolog	-1.02744	1.00493
12	6	-0.412	-0.0081	0.751581	-0.0276726	0.488962	48	0.0244613	0.994401	12	HUMAN	P26639	Threonine--tRNA ligase, cytoplasmic	-1.03221	1.00563
4	2	-0.413	-0.0091	0.75106	-0.0317344	0.487342	52	0.0244154	0.993712	4	HUMAN	O15027	Protein transport protein Sec16A	-1.03699	1.00633
10	8	-0.413	-0.0091	0.75106	-0.0317344	0.487342	53	0.0244039	0.993712	10	HUMAN	Q9NTJ3	Structural maintenance of chromosomes protein 4	-1.03699	1.00633
170	21	-0.413	-0.0091	0.75106	-0.0317344	0.487342	54	0.0243925	0.993712	170	HUMAN	P07355|A6NMY6	Annexin A2	-1.03699	1.00633
3	3	-0.414	-0.0101	0.75054	-0.0357961	0.485722	57	0.0243581	0.993024	3	HUMAN	P32456	Interferon-induced guanylate-binding protein 2	-1.0418	1.00703
9	6	-0.414	-0.0101	0.75054	-0.0357961	0.485722	58	0.0243466	0.993024	9	HUMAN	P18031	Tyrosine-protein phosphatase non-receptor type 1	-1.0418	1.00703
11	9	-0.414	-0.0101	0.75054	-0.0357961	0.485722	59	0.0243352	0.993024	11	HUMAN	Q7L576|Q96F07	Cytoplasmic FMR1-interacting protein 1	-1.0418	1.00703
9	2	-0.415	-0.0111	0.750019	-0.0398578	0.484103	65	0.0242664	0.992336	9	HUMAN	P61353	60S ribosomal protein L27	-1.04661	1.00772
4	2	-0.415	-0.0111	0.750019	-0.0398578	0.484103	66	0.0242549	0.992336	4	HUMAN	O95373	Importin-7	-1.04661	1.00772
2	2	-0.415	-0.0111	0.750019	-0.0398578	0.484103	67	0.0242435	0.992336	2	HUMAN	Q6P9B6	TLD domain-containing protein KIAA1609	-1.04661	1.00772
3	3	-0.415	-0.0111	0.750019	-0.0398578	0.484103	68	0.024232	0.992336	3	HUMAN	Q96A65	Exocyst complex component 4	-1.04661	1.00772
14	10	-0.415	-0.0111	0.750019	-0.0398578	0.484103	69	0.0242205	0.992336	14	HUMAN	P53621	Coatomer subunit alpha	-1.04661	1.00772
14	3	-0.416	-0.0121	0.7495	-0.0439196	0.482484	74	0.0241632	0.991648	14	HUMAN	P60981	Destrin	-1.05145	1.00842
64	37	-0.416	-0.0121	0.7495	-0.0439196	0.482484	75	0.0241518	0.991648	64	HUMAN	Q13813	Spectrin alpha chain, brain	-1.05145	1.00842
4	2	-0.417	-0.0131	0.74898	-0.0479813	0.480866	84	0.0240486	0.990961	4	HUMAN	Q15102	Platelet-activating factor acetylhydrolase IB subunit gamma	-1.05629	1.00912
5	3	-0.417	-0.0131	0.74898	-0.0479813	0.480866	85	0.0240371	0.990961	5	HUMAN	O00469	Procollagen-lysine,2-oxoglutarate 5-dioxygenase 2	-1.05629	1.00912
3	3	-0.417	-0.0131	0.74898	-0.0479813	0.480866	86	0.0240257	0.990961	3	HUMAN	Q15424	Scaffold attachment factor B1	-1.05629	1.00912
3	2	-0.418	-0.0141	0.748461	-0.0520431	0.479247	90	0.0239798	0.990274	3	HUMAN	Q93009	Ubiquitin carboxyl-terminal hydrolase 7	-1.06116	1.00982
9	3	-0.418	-0.0141	0.748461	-0.0520431	0.479247	91	0.0239684	0.990274	9	HUMAN	O75347	Tubulin-specific chaperone A	-1.06116	1.00982
13	7	-0.418	-0.0141	0.748461	-0.0520431	0.479247	92	0.0239569	0.990274	14	HUMAN	Q7L2E3|Q7Z478	ATP-dependent RNA helicase DHX29	-1.06116	1.00982
14	8	-0.418	-0.0141	0.748461	-0.0520431	0.479247	93	0.0239454	0.990274	14	HUMAN	O43615	Mitochondrial import inner membrane translocase subunit TIM44	-1.06116	1.00982
3	2	-0.419	-0.0151	0.747943	-0.0561048	0.477629	98	0.0238881	0.989588	3	HUMAN	P54803	Galactocerebrosidase	-1.06604	1.01052
5	2	-0.419	-0.0151	0.747943	-0.0561048	0.477629	99	0.0238767	0.989588	5	HUMAN	Q13084	39S ribosomal protein L28, mitochondrial	-1.06604	1.01052
7	4	-0.419	-0.0151	0.747943	-0.0561048	0.477629	100	0.0238652	0.989588	7	HUMAN	Q86VS8	Protein Hook homolog 3	-1.06604	1.01052
2	2	-0.42	-0.0161	0.747425	-0.0601665	0.476012	104	0.0238193	0.988902	2	HUMAN	Q13601	KRR1 small subunit processome component homolog	-1.07093	1.01122
7	4	-0.42	-0.0161	0.747425	-0.0601665	0.476012	105	0.0238079	0.988902	7	HUMAN	Q96S55	ATPase WRNIP1	-1.07093	1.01122
2	2	-0.421	-0.0171	0.746907	-0.0642283	0.474394	109	0.023762	0.988217	2	HUMAN	O15143	Actin-related protein 2/3 complex subunit 1B	-1.07584	1.01192
2	2	-0.421	-0.0171	0.746907	-0.0642283	0.474394	110	0.0237506	0.988217	2	HUMAN	P19388	DNA-directed RNA polymerases I, II, and III subunit RPABC1	-1.07584	1.01192
5	2	-0.422	-0.0181	0.746389	-0.06829	0.472777	112	0.0237276	0.987532	5	HUMAN	P55196	Afadin	-1.08077	1.01262
4	2	-0.423	-0.0191	0.745872	-0.0723517	0.471161	114	0.0237047	0.986848	4	HUMAN	O15269	Serine palmitoyltransferase 1	-1.08571	1.01333
2	2	-0.423	-0.0191	0.745872	-0.0723517	0.471161	115	0.0236933	0.986848	2	HUMAN	Q99729	Heterogeneous nuclear ribonucleoprotein A/B	-1.08571	1.01333
5	4	-0.423	-0.0191	0.745872	-0.0723517	0.471161	116	0.0236818	0.986848	5	HUMAN	Q96CW1	AP-2 complex subunit mu	-1.08571	1.01333
68	8	-0.423	-0.0191	0.745872	-0.0723517	0.471161	117	0.0236703	0.986848	68	HUMAN	P63261|P60709|P62736|P68133|P68032|P63267|Q6S8J3|A5A3E0|Q562R1|Q9BYX7|P0CG38|P0CG39	Actin, cytoplasmic 2	-1.08571	1.01333
2	2	-0.424	-0.0201	0.745355	-0.0764135	0.469545	122	0.023613	0.986164	2	HUMAN	O95340	Bifunctional 3'-phosphoadenosine 5'-phosphosulfate synthase 2	-1.09066	1.01403
4	3	-0.424	-0.0201	0.745355	-0.0764135	0.469545	123	0.0236016	0.986164	4	HUMAN	Q9BT78	COP9 signalosome complex subunit 4	-1.09066	1.01403
19	6	-0.424	-0.0201	0.745355	-0.0764135	0.469545	124	0.0235901	0.986164	19	HUMAN	P42167	Lamina-associated polypeptide 2, isoforms beta/gamma	-1.09066	1.01403
3	2	-0.425	-0.0211	0.744839	-0.0804752	0.46793	126	0.0235672	0.985481	3	HUMAN	O00233	26S proteasome non-ATPase regulatory subunit 9	-1.09564	1.01473
4	3	-0.425	-0.0211	0.744839	-0.0804752	0.46793	127	0.0235557	0.985481	4	HUMAN	Q5T0F9	Coiled-coil and C2 domain-containing protein 1B	-1.09564	1.01473
11	4	-0.425	-0.0211	0.744839	-0.0804752	0.46793	128	0.0235442	0.985481	11	HUMAN	P48739	Phosphatidylinositol transfer protein beta isoform	-1.09564	1.01473
5	4	-0.425	-0.0211	0.744839	-0.0804752	0.46793	129	0.0235328	0.985481	5	HUMAN	P18621	60S ribosomal protein L17	-1.09564	1.01473
10	6	-0.425	-0.0211	0.744839	-0.0804752	0.46793	130	0.0235213	0.985481	10	HUMAN	O75534	Cold shock domain-containing protein E1	-1.09564	1.01473
2	2	-0.426	-0.0221	0.744323	-0.084537	0.466315	134	0.0234755	0.984798	2	HUMAN	Q96CB9	Putative methyltransferase NSUN4	-1.10062	1.01544
3	2	-0.427	-0.0231	0.743807	-0.0885987	0.4647	138	0.0234296	0.984116	3	HUMAN	P63098	Calcineurin subunit B type 1	-1.10563	1.01614
2	2	-0.427	-0.0231	0.743807	-0.0885987	0.4647	139	0.0234182	0.984116	2	HUMAN	Q9NXH8	Torsin-4A	-1.10563	1.01614
18	4	-0.427	-0.0231	0.743807	-0.0885987	0.4647	140	0.0234067	0.984116	18	HUMAN	P61006	Ras-related protein Rab-8A	-1.10563	1.01614
6	4	-0.427	-0.0231	0.743807	-0.0885987	0.4647	141	0.0233952	0.984116	6	HUMAN	P33991	DNA replication licensing factor MCM4	-1.10563	1.01614
15	5	-0.427	-0.0231	0.743807	-0.0885987	0.4647	142	0.0233838	0.984116	15	HUMAN	Q13011	Delta(3,5)-Delta(2,4)-dienoyl-CoA isomerase, mitochondrial	-1.10563	1.01614
6	5	-0.427	-0.0231	0.743807	-0.0885987	0.4647	143	0.0233723	0.984116	6	HUMAN	Q70J99	Protein unc-13 homolog D	-1.10563	1.01614
3	2	-0.429	-0.0251	0.742776	-0.0967222	0.461474	151	0.0232806	0.982752	3	HUMAN	Q9HCU5	Prolactin regulatory element-binding protein	-1.11568	1.01755
2	2	-0.429	-0.0251	0.742776	-0.0967222	0.461474	152	0.0232691	0.982752	2	HUMAN	Q9H553	Alpha-1,3/1,6-mannosyltransferase ALG2	-1.11568	1.01755
4	3	-0.429	-0.0251	0.742776	-0.0967222	0.461474	153	0.0232577	0.982752	4	HUMAN	P50579	Methionine aminopeptidase 2	-1.11568	1.01755
3	3	-0.429	-0.0251	0.742776	-0.0967222	0.461474	154	0.0232462	0.982752	3	HUMAN	O95819	Mitogen-activated protein kinase kinase kinase kinase 4	-1.11568	1.01755
7	3	-0.429	-0.0251	0.742776	-0.0967222	0.461474	155	0.0232348	0.982752	7	HUMAN	P62249	40S ribosomal protein S16	-1.11568	1.01755
20	7	-0.429	-0.0251	0.742776	-0.0967222	0.461474	156	0.0232233	0.982752	20	HUMAN	P42166	Lamina-associated polypeptide 2, isoform alpha	-1.11568	1.01755
8	8	-0.429	-0.0251	0.742776	-0.0967222	0.461474	157	0.0232118	0.982752	8	HUMAN	P25205	DNA replication licensing factor MCM3	-1.11568	1.01755
4	2	-0.43	-0.0261	0.742262	-0.100784	0.459861	165	0.0231201	0.982072	4	HUMAN	Q8NFQ8	Torsin-1A-interacting protein 2	-1.12073	1.01826
4	2	-0.43	-0.0261	0.742262	-0.100784	0.459861	166	0.0231087	0.982072	4	HUMAN	Q08AH1	Acyl-coenzyme A synthetase ACSM1, mitochondrial	-1.12073	1.01826
6	3	-0.43	-0.0261	0.742262	-0.100784	0.459861	167	0.0230972	0.982072	6	HUMAN	P62917	60S ribosomal protein L8	-1.12073	1.01826
10	5	-0.43	-0.0261	0.742262	-0.100784	0.459861	168	0.0230857	0.982072	10	HUMAN	Q9BVK6	Transmembrane emp24 domain-containing protein 9	-1.12073	1.01826
17	6	-0.43	-0.0261	0.742262	-0.100784	0.459861	169	0.0230743	0.982072	17	HUMAN	P16035	Metalloproteinase inhibitor 2	-1.12073	1.01826
9	6	-0.43	-0.0261	0.742262	-0.100784	0.459861	170	0.0230628	0.982072	9	HUMAN	P06744	Glucose-6-phosphate isomerase	-1.12073	1.01826
3	2	-0.431	-0.0271	0.741747	-0.104846	0.458249	174	0.023017	0.981391	3	HUMAN	Q9NZL9	Methionine adenosyltransferase 2 subunit beta	-1.1258	1.01896
3	2	-0.431	-0.0271	0.741747	-0.104846	0.458249	175	0.0230055	0.981391	3	HUMAN	Q9H9E3	Conserved oligomeric Golgi complex subunit 4	-1.1258	1.01896
2	2	-0.431	-0.0271	0.741747	-0.104846	0.458249	176	0.022994	0.981391	2	HUMAN	P35658	Nuclear pore complex protein Nup214	-1.1258	1.01896
6	5	-0.431	-0.0271	0.741747	-0.104846	0.458249	177	0.0229826	0.981391	6	HUMAN	Q9Y520	Protein PRRC2C	-1.1258	1.01896
16	7	-0.431	-0.0271	0.741747	-0.104846	0.458249	178	0.0229711	0.981391	16	HUMAN	P04040	Catalase	-1.1258	1.01896
4	3	-0.432	-0.0281	0.741234	-0.108907	0.456638	183	0.0229138	0.980711	4	HUMAN	Q9ULG6	Cell cycle progression protein 1	-1.13088	1.01967
10	5	-0.432	-0.0281	0.741234	-0.108907	0.456638	184	0.0229023	0.980711	10	HUMAN	P49915	GMP synthase [glutamine-hydrolyzing]	-1.13088	1.01967
8	6	-0.432	-0.0281	0.741234	-0.108907	0.456638	185	0.0228909	0.980711	8	HUMAN	Q1KMD3	Heterogeneous nuclear ribonucleoprotein U-like protein 2	-1.13088	1.01967
2	2	-0.433	-0.0291	0.74072	-0.112969	0.455028	189	0.022845	0.980031	2	HUMAN	Q96BW5	Phosphotriesterase-related protein	-1.13597	1.02038
5	3	-0.433	-0.0291	0.74072	-0.112969	0.455028	190	0.0228336	0.980031	5	HUMAN	Q9UBB4	Ataxin-10	-1.13597	1.02038
6	2	-0.434	-0.0301	0.740207	-0.117031	0.453418	192	0.0228106	0.979352	6	HUMAN	P35268	60S ribosomal protein L22	-1.14109	1.02108
2	2	-0.434	-0.0301	0.740207	-0.117031	0.453418	193	0.0227992	0.979352	2	HUMAN	Q96HY7	Probable 2-oxoglutarate dehydrogenase E1 component DHKTD1, mitochondrial	-1.14109	1.02108
10	3	-0.434	-0.0301	0.740207	-0.117031	0.453418	194	0.0227877	0.979352	10	HUMAN	Q07020	60S ribosomal protein L18	-1.14109	1.02108
7	6	-0.434	-0.0301	0.740207	-0.117031	0.453418	195	0.0227762	0.979352	7	HUMAN	P13861	cAMP-dependent protein kinase type II-alpha regulatory subunit	-1.14109	1.02108
3	2	-0.435	-0.0311	0.739694	-0.121093	0.451809	198	0.0227419	0.978674	3	HUMAN	O75880	Protein SCO1 homolog, mitochondrial	-1.14622	1.02179
5	2	-0.435	-0.0311	0.739694	-0.121093	0.451809	199	0.0227304	0.978674	5	HUMAN	Q9Y6G9	Cytoplasmic dynein 1 light intermediate chain 1	-1.14622	1.02179
2	2	-0.435	-0.0311	0.739694	-0.121093	0.451809	200	0.0227189	0.978674	2	HUMAN	P52434	DNA-directed RNA polymerases I, II, and III subunit RPABC3	-1.14622	1.02179
4	3	-0.435	-0.0311	0.739694	-0.121093	0.451809	201	0.0227075	0.978674	4	HUMAN	Q8TAT6	Nuclear protein localization protein 4 homolog	-1.14622	1.02179
6	6	-0.435	-0.0311	0.739694	-0.121093	0.451809	202	0.022696	0.978674	6	HUMAN	Q07157	Tight junction protein ZO-1	-1.14622	1.02179
5	2	-0.436	-0.0321	0.739181	-0.125154	0.450201	205	0.0226616	0.977996	5	HUMAN	Q13257	Mitotic spindle assembly checkpoint protein MAD2A	-1.15136	1.0225
3	2	-0.437	-0.0331	0.738669	-0.129216	0.448593	210	0.0226043	0.977318	3	HUMAN	O60762	Dolichol-phosphate mannosyltransferase	-1.15652	1.02321
4	4	-0.437	-0.0331	0.738669	-0.129216	0.448593	211	0.0225928	0.977318	4	HUMAN	O95425	Supervillin	-1.15652	1.02321
12	5	-0.437	-0.0331	0.738669	-0.129216	0.448593	212	0.0225814	0.977318	12	HUMAN	P50995|P27216	Annexin A11	-1.15652	1.02321
8	5	-0.437	-0.0331	0.738669	-0.129216	0.448593	213	0.0225699	0.977318	8	HUMAN	P29692	Elongation factor 1-delta	-1.15652	1.02321
7	4	-0.438	-0.0341	0.738157	-0.133278	0.446987	217	0.0225241	0.976641	7	HUMAN	Q12981	Vesicle transport protein SEC20	-1.1617	1.02392
8	7	-0.438	-0.0341	0.738157	-0.133278	0.446987	218	0.0225126	0.976641	8	HUMAN	Q06124	Tyrosine-protein phosphatase non-receptor type 11	-1.1617	1.02392
5	3	-0.439	-0.0351	0.737646	-0.13734	0.445381	226	0.0224209	0.975964	5	HUMAN	Q96P70	Importin-9	-1.16689	1.02463
15	5	-0.439	-0.0351	0.737646	-0.13734	0.445381	227	0.0224094	0.975964	15	HUMAN	P46977	Dolichyl-diphosphooligosaccharide--protein glycosyltransferase subunit STT3A	-1.16689	1.02463
6	5	-0.439	-0.0351	0.737646	-0.13734	0.445381	228	0.022398	0.975964	6	HUMAN	P62277	40S ribosomal protein S13	-1.16689	1.02463
9	6	-0.439	-0.0351	0.737646	-0.13734	0.445381	229	0.0223865	0.975964	9	HUMAN	O75165	DnaJ homolog subfamily C member 13	-1.16689	1.02463
7	2	-0.44	-0.0361	0.737135	-0.141401	0.443776	240	0.0222604	0.975288	7	HUMAN	Q8NHH9	Atlastin-2	-1.17209	1.02534
2	2	-0.44	-0.0361	0.737135	-0.141401	0.443776	241	0.022249	0.975288	2	HUMAN	Q3KQV9	UDP-N-acetylhexosamine pyrophosphorylase-like protein 1	-1.17209	1.02534
4	3	-0.44	-0.0361	0.737135	-0.141401	0.443776	242	0.0222375	0.975288	4	HUMAN	Q96QK1	Vacuolar protein sorting-associated protein 35	-1.17209	1.02534
3	2	-0.441	-0.0371	0.736624	-0.145463	0.442173	245	0.0222031	0.974612	3	HUMAN	Q9UKX7	Nuclear pore complex protein Nup50	-1.17732	1.02605
4	4	-0.441	-0.0371	0.736624	-0.145463	0.442173	246	0.0221917	0.974612	4	HUMAN	Q86SF2	N-acetylgalactosaminyltransferase 7	-1.17732	1.02605
3	2	-0.442	-0.0381	0.736113	-0.149525	0.44057	249	0.0221573	0.973937	3	HUMAN	P33316	Deoxyuridine 5'-triphosphate nucleotidohydrolase, mitochondrial	-1.18256	1.02676
3	3	-0.442	-0.0381	0.736113	-0.149525	0.44057	250	0.0221458	0.973937	3	HUMAN	Q96KG9	N-terminal kinase-like protein	-1.18256	1.02676
10	6	-0.442	-0.0381	0.736113	-0.149525	0.44057	251	0.0221343	0.973937	10	HUMAN	Q9Y2X3	Nucleolar protein 58	-1.18256	1.02676
2	2	-0.443	-0.0391	0.735603	-0.153587	0.438968	253	0.0221114	0.973262	2	HUMAN	Q02388	Collagen alpha-1(VII) chain	-1.18781	1.02747
10	4	-0.443	-0.0391	0.735603	-0.153587	0.438968	254	0.0221	0.973262	10	HUMAN	P48960	CD97 antigen	-1.18781	1.02747
5	4	-0.443	-0.0391	0.735603	-0.153587	0.438968	255	0.0220885	0.973262	5	HUMAN	Q9Y3D7	Mitochondrial import inner membrane translocase subunit TIM16	-1.18781	1.02747
10	5	-0.444	-0.0401	0.735094	-0.157648	0.437367	259	0.0220426	0.972588	10	HUMAN	P26373	60S ribosomal protein L13	-1.19308	1.02819
2	2	-0.445	-0.0411	0.734584	-0.16171	0.435767	265	0.0219739	0.971914	2	HUMAN	Q9Y3A3	MOB-like protein phocein	-1.19837	1.0289
6	3	-0.445	-0.0411	0.734584	-0.16171	0.435767	266	0.0219624	0.971914	6	HUMAN	Q99805	Transmembrane 9 superfamily member 2	-1.19837	1.0289
4	4	-0.446	-0.0421	0.734075	-0.165772	0.434168	273	0.0218822	0.97124	4	HUMAN	P21912	Succinate dehydrogenase [ubiquinone] iron-sulfur subunit, mitochondrial	-1.20367	1.02961
7	4	-0.447	-0.0431	0.733567	-0.169833	0.432571	277	0.0218363	0.970567	7	HUMAN	O95817	BAG family molecular chaperone regulator 3	-1.20899	1.03033
19	2	-0.448	-0.0441	0.733058	-0.173895	0.430974	282	0.021779	0.969895	19	HUMAN	P55209	Nucleosome assembly protein 1-like 1	-1.21433	1.03104
5	2	-0.448	-0.0441	0.733058	-0.173895	0.430974	283	0.0217675	0.969895	5	HUMAN	Q9Y320	Thioredoxin-related transmembrane protein 2	-1.21433	1.03104
7	2	-0.448	-0.0441	0.733058	-0.173895	0.430974	284	0.0217561	0.969895	7	HUMAN	Q9Y6Y8	SEC23-interacting protein	-1.21433	1.03104
2	2	-0.448	-0.0441	0.733058	-0.173895	0.430974	285	0.0217446	0.969895	2	HUMAN	P14621	Acylphosphatase-2	-1.21433	1.03104
12	4	-0.448	-0.0441	0.733058	-0.173895	0.430974	286	0.0217331	0.969895	12	HUMAN	P00387	NADH-cytochrome b5 reductase 3	-1.21433	1.03104
22	5	-0.448	-0.0441	0.733058	-0.173895	0.430974	287	0.0217217	0.969895	22	HUMAN	P20340	Ras-related protein Rab-6A	-1.21433	1.03104
17	5	-0.448	-0.0441	0.733058	-0.173895	0.430974	288	0.0217102	0.969895	17	HUMAN	P55084	Trifunctional enzyme subunit beta, mitochondrial	-1.21433	1.03104
18	12	-0.448	-0.0441	0.733058	-0.173895	0.430974	289	0.0216988	0.969895	18	HUMAN	Q9UDY2	Tight junction protein ZO-2	-1.21433	1.03104
4	2	-0.449	-0.0451	0.73255	-0.177957	0.429378	296	0.0216185	0.969223	4	HUMAN	Q92597	Protein NDRG1	-1.21968	1.03175
21	3	-0.449	-0.0451	0.73255	-0.177957	0.429378	297	0.0216071	0.969223	21	HUMAN	P02765	Alpha-2-HS-glycoprotein	-1.21968	1.03175
3	3	-0.449	-0.0451	0.73255	-0.177957	0.429378	298	0.0215956	0.969223	3	HUMAN	P46937	Yorkie homolog	-1.21968	1.03175
2	2	-0.45	-0.0461	0.732043	-0.182019	0.427784	303	0.0215383	0.968551	2	HUMAN	Q9Y608	Leucine-rich repeat flightless-interacting protein 2	-1.22505	1.03247
2	2	-0.45	-0.0461	0.732043	-0.182019	0.427784	304	0.0215268	0.968551	2	HUMAN	P56182	Ribosomal RNA processing protein 1 homolog A	-1.22505	1.03247
3	3	-0.45	-0.0461	0.732043	-0.182019	0.427784	305	0.0215154	0.968551	3	HUMAN	P40261	Nicotinamide N-methyltransferase	-1.22505	1.03247
3	3	-0.45	-0.0461	0.732043	-0.182019	0.427784	306	0.0215039	0.968551	3	HUMAN	Q8WXX5	DnaJ homolog subfamily C member 9	-1.22505	1.03247
9	7	-0.45	-0.0461	0.732043	-0.182019	0.427784	307	0.0214924	0.968551	9	HUMAN	Q32MZ4	Leucine-rich repeat flightless-interacting protein 1	-1.22505	1.03247
5	5	-0.451	-0.0471	0.731536	-0.18608	0.426191	309	0.0214695	0.96788	5	HUMAN	Q14643	Inositol 1,4,5-trisphosphate receptor type 1	-1.23043	1.03319
10	3	-0.452	-0.0481	0.731029	-0.190142	0.424599	314	0.0214122	0.967209	10	HUMAN	P62241	40S ribosomal protein S8	-1.23583	1.0339
7	6	-0.452	-0.0481	0.731029	-0.190142	0.424599	315	0.0214007	0.967209	7	HUMAN	Q99996	A-kinase anchor protein 9	-1.23583	1.0339
3	2	-0.453	-0.0491	0.730522	-0.194204	0.423008	318	0.0213663	0.966539	3	HUMAN	Q9BSR8	Protein YIPF4	-1.24124	1.03462
5	3	-0.453	-0.0491	0.730522	-0.194204	0.423008	319	0.0213549	0.966539	5	HUMAN	Q7Z3D6	UPF0317 protein C14orf159, mitochondrial	-1.24124	1.03462
9	5	-0.453	-0.0491	0.730522	-0.194204	0.423008	320	0.0213434	0.966539	9	HUMAN	Q9Y3I0	tRNA-splicing ligase RtcB homolog	-1.24124	1.03462
2	2	-0.454	-0.0501	0.730016	-0.198266	0.421419	325	0.0212861	0.965869	2	HUMAN	Q9BVL2	Nucleoporin p58/p45	-1.24667	1.03534
6	3	-0.454	-0.0501	0.730016	-0.198266	0.421419	326	0.0212746	0.965869	6	HUMAN	P61812	Transforming growth factor beta-2	-1.24667	1.03534
7	4	-0.454	-0.0501	0.730016	-0.198266	0.421419	327	0.0212632	0.965869	7	HUMAN	P55884	Eukaryotic translation initiation factor 3 subunit B	-1.24667	1.03534
4	4	-0.454	-0.0501	0.730016	-0.198266	0.421419	328	0.0212517	0.965869	4	HUMAN	O00186	Syntaxin-binding protein 3	-1.24667	1.03534
12	9	-0.454	-0.0501	0.730016	-0.198266	0.421419	329	0.0212403	0.965869	12	HUMAN	P07814	Bifunctional glutamate/proline--tRNA ligase	-1.24667	1.03534
2	2	-0.455	-0.0511	0.72951	-0.202327	0.41983	334	0.0211829	0.9652	2	HUMAN	Q99807	Ubiquinone biosynthesis protein COQ7 homolog	-1.25212	1.03605
7	3	-0.455	-0.0511	0.72951	-0.202327	0.41983	335	0.0211715	0.9652	7	HUMAN	Q96AJ9	Vesicle transport through interaction with t-SNAREs homolog 1A	-1.25212	1.03605
3	3	-0.455	-0.0511	0.72951	-0.202327	0.41983	336	0.02116	0.9652	3	HUMAN	P17252	Protein kinase C alpha type	-1.25212	1.03605
4	3	-0.455	-0.0511	0.72951	-0.202327	0.41983	337	0.0211486	0.9652	4	HUMAN	Q9BYX2	TBC1 domain family member 2A	-1.25212	1.03605
4	3	-0.455	-0.0511	0.72951	-0.202327	0.41983	338	0.0211371	0.9652	4	HUMAN	Q13620	Cullin-4B	-1.25212	1.03605
7	5	-0.455	-0.0511	0.72951	-0.202327	0.41983	339	0.0211256	0.9652	7	HUMAN	Q53GQ0	Estradiol 17-beta-dehydrogenase 12	-1.25212	1.03605
3	3	-0.456	-0.0521	0.729005	-0.206389	0.418243	345	0.0210569	0.964531	3	HUMAN	P25685	DnaJ homolog subfamily B member 1	-1.25759	1.03677
5	2	-0.457	-0.0531	0.7285	-0.210451	0.416658	346	0.0210454	0.963863	5	HUMAN	P61923	Coatomer subunit zeta-1	-1.26306	1.03749
3	2	-0.457	-0.0531	0.7285	-0.210451	0.416658	347	0.0210339	0.963863	3	HUMAN	Q9UBQ7	Glyoxylate reductase/hydroxypyruvate reductase	-1.26306	1.03749
2	2	-0.457	-0.0531	0.7285	-0.210451	0.416658	348	0.0210225	0.963863	2	HUMAN	O15355	Protein phosphatase 1G	-1.26306	1.03749
2	2	-0.457	-0.0531	0.7285	-0.210451	0.416658	349	0.021011	0.963863	2	HUMAN	O00151	PDZ and LIM domain protein 1	-1.26306	1.03749
2	2	-0.457	-0.0531	0.7285	-0.210451	0.416658	350	0.0209995	0.963863	2	HUMAN	P36404	ADP-ribosylation factor-like protein 2	-1.26306	1.03749
5	3	-0.457	-0.0531	0.7285	-0.210451	0.416658	351	0.0209881	0.963863	5	HUMAN	Q15582	Transforming growth factor-beta-induced protein ig-h3	-1.26306	1.03749
9	4	-0.457	-0.0531	0.7285	-0.210451	0.416658	352	0.0209766	0.963863	9	HUMAN	P11233	Ras-related protein Ral-A	-1.26306	1.03749
19	5	-0.457	-0.0531	0.7285	-0.210451	0.416658	353	0.0209652	0.963863	19	HUMAN	P62937	Peptidyl-prolyl cis-trans isomerase A	-1.26306	1.03749
11	5	-0.457	-0.0531	0.7285	-0.210451	0.416658	354	0.0209537	0.963863	11	HUMAN	Q8NE86	Calcium uniporter protein, mitochondrial	-1.26306	1.03749
19	6	-0.457	-0.0531	0.7285	-0.210451	0.416658	355	0.0209422	0.963863	19	HUMAN	P61019|Q8WUD1	Ras-related protein Rab-2A	-1.26306	1.03749
17	6	-0.457	-0.0531	0.7285	-0.210451	0.416658	356	0.0209308	0.963863	17	HUMAN	P47985|P0C7P4	Cytochrome b-c1 complex subunit Rieske, mitochondrial	-1.26306	1.03749
18	8	-0.457	-0.0531	0.7285	-0.210451	0.416658	357	0.0209193	0.963863	18	HUMAN	Q96A33	Coiled-coil domain-containing protein 47	-1.26306	1.03749
3	2	-0.458	-0.0541	0.727995	-0.214513	0.415074	362	0.020862	0.963195	3	HUMAN	O43676	NADH dehydrogenase [ubiquinone] 1 beta subcomplex subunit 3	-1.26856	1.03821
5	2	-0.458	-0.0541	0.727995	-0.214513	0.415074	363	0.0208505	0.963195	5	HUMAN	P42677	40S ribosomal protein S27	-1.26856	1.03821
6	2	-0.458	-0.0541	0.727995	-0.214513	0.415074	364	0.0208391	0.963195	6	HUMAN	P46199	Translation initiation factor IF-2, mitochondrial	-1.26856	1.03821
2	2	-0.458	-0.0541	0.727995	-0.214513	0.415074	365	0.0208276	0.963195	2	HUMAN	Q5JTH9	RRP12-like protein	-1.26856	1.03821
7	5	-0.458	-0.0541	0.727995	-0.214513	0.415074	366	0.0208161	0.963195	7	HUMAN	Q9NZB2	Constitutive coactivator of PPAR-gamma-like protein 1	-1.26856	1.03821
5	5	-0.458	-0.0541	0.727995	-0.214513	0.415074	367	0.0208047	0.963195	5	HUMAN	P06213	Insulin receptor	-1.26856	1.03821
2	2	-0.459	-0.0551	0.72749	-0.218574	0.413491	371	0.0207588	0.962528	2	HUMAN	Q9BY43	Charged multivesicular body protein 4a	-1.27407	1.03893
3	2	-0.459	-0.0551	0.72749	-0.218574	0.413491	372	0.0207474	0.962528	3	HUMAN	Q96KC8	DnaJ homolog subfamily C member 1	-1.27407	1.03893
2	2	-0.459	-0.0551	0.72749	-0.218574	0.413491	373	0.0207359	0.962528	2	HUMAN	Q9NZT2	Opioid growth factor receptor	-1.27407	1.03893
2	2	-0.46	-0.0561	0.726986	-0.222636	0.411909	376	0.0207015	0.961861	2	HUMAN	O00499	Myc box-dependent-interacting protein 1	-1.2796	1.03965
2	2	-0.46	-0.0561	0.726986	-0.222636	0.411909	377	0.0206901	0.961861	2	HUMAN	Q8N392	Rho GTPase-activating protein 18	-1.2796	1.03965
4	3	-0.46	-0.0561	0.726986	-0.222636	0.411909	378	0.0206786	0.961861	4	HUMAN	Q96HS1	Serine/threonine-protein phosphatase PGAM5, mitochondrial	-1.2796	1.03965
7	3	-0.46	-0.0561	0.726986	-0.222636	0.411909	379	0.0206671	0.961861	7	HUMAN	P02794	Ferritin heavy chain	-1.2796	1.03965
12	4	-0.46	-0.0561	0.726986	-0.222636	0.411909	380	0.0206557	0.961861	12	HUMAN	P54727	UV excision repair protein RAD23 homolog B	-1.2796	1.03965
13	6	-0.46	-0.0561	0.726986	-0.222636	0.411909	381	0.0206442	0.961861	13	HUMAN	Q12906|Q96SI9	Interleukin enhancer-binding factor 3	-1.2796	1.03965
7	6	-0.46	-0.0561	0.726986	-0.222636	0.411909	382	0.0206327	0.961861	7	HUMAN	Q9BTU6	Phosphatidylinositol 4-kinase type 2-alpha	-1.2796	1.03965
3	2	-0.461	-0.0571	0.726483	-0.226698	0.410329	384	0.0206098	0.961194	3	HUMAN	O96011	Peroxisomal membrane protein 11B	-1.28515	1.04037
3	2	-0.461	-0.0571	0.726483	-0.226698	0.410329	385	0.0205983	0.961194	3	HUMAN	Q9NZJ9|Q96G61|Q8NFP7	Diphosphoinositol polyphosphate phosphohydrolase 2	-1.28515	1.04037
9	4	-0.461	-0.0571	0.726483	-0.226698	0.410329	386	0.0205869	0.961194	9	HUMAN	Q9UKM9	RNA-binding protein Raly	-1.28515	1.04037
6	4	-0.461	-0.0571	0.726483	-0.226698	0.410329	387	0.0205754	0.961194	6	HUMAN	P51970	NADH dehydrogenase [ubiquinone] 1 alpha subcomplex subunit 8	-1.28515	1.04037
2	2	-0.462	-0.0581	0.725979	-0.23076	0.408751	393	0.0205066	0.960528	2	HUMAN	P52948	Nuclear pore complex protein Nup98-Nup96	-1.29071	1.04109
2	2	-0.462	-0.0581	0.725979	-0.23076	0.408751	394	0.0204952	0.960528	2	HUMAN	O95363	Phenylalanine--tRNA ligase, mitochondrial	-1.29071	1.04109
7	6	-0.462	-0.0581	0.725979	-0.23076	0.408751	395	0.0204837	0.960528	7	HUMAN	Q14126	Desmoglein-2	-1.29071	1.04109
33	14	-0.462	-0.0581	0.725979	-0.23076	0.408751	396	0.0204723	0.960528	33	HUMAN	P08729	Keratin, type II cytoskeletal 7	-1.29071	1.04109
9	5	-0.463	-0.0591	0.725476	-0.234821	0.407174	400	0.0204264	0.959863	9	HUMAN	P19440|P36268|A6NGU5|B5MD39|Q14390	Gamma-glutamyltranspeptidase 1	-1.29628	1.04182
6	6	-0.463	-0.0591	0.725476	-0.234821	0.407174	401	0.0204149	0.959863	6	HUMAN	Q13948|P39880	Protein CASP	-1.29628	1.04182
4	2	-0.464	-0.0601	0.724973	-0.238883	0.405598	403	0.020392	0.959198	4	HUMAN	Q9H444	Charged multivesicular body protein 4b	-1.30188	1.04254
2	2	-0.464	-0.0601	0.724973	-0.238883	0.405598	404	0.0203806	0.959198	2	HUMAN	O95232	Luc7-like protein 3	-1.30188	1.04254
8	5	-0.464	-0.0601	0.724973	-0.238883	0.405598	405	0.0203691	0.959198	8	HUMAN	P82914	28S ribosomal protein S15, mitochondrial	-1.30188	1.04254
2	2	-0.465	-0.0611	0.724471	-0.242945	0.404024	413	0.0202774	0.958533	2	HUMAN	O15320	Cutaneous T-cell lymphoma-associated antigen 5	-1.30749	1.04326
3	3	-0.466	-0.0621	0.723969	-0.247006	0.402452	418	0.0202201	0.957869	3	HUMAN	Q96AX1	Vacuolar protein sorting-associated protein 33A	-1.31311	1.04398
5	4	-0.466	-0.0621	0.723969	-0.247006	0.402452	419	0.0202086	0.957869	5	HUMAN	Q8N1G4	Leucine-rich repeat-containing protein 47	-1.31311	1.04398
5	2	-0.467	-0.0631	0.723467	-0.251068	0.400881	422	0.0201742	0.957205	5	HUMAN	Q9Y2I6	Ninein-like protein	-1.31876	1.04471
2	2	-0.467	-0.0631	0.723467	-0.251068	0.400881	423	0.0201628	0.957205	2	HUMAN	Q9BY44	Eukaryotic translation initiation factor 2A	-1.31876	1.04471
8	3	-0.467	-0.0631	0.723467	-0.251068	0.400881	424	0.0201513	0.957205	9	HUMAN	Q92688|P39687|O43423|O95626	Acidic leucine-rich nuclear phosphoprotein 32 family member B	-1.31876	1.04471
15	5	-0.467	-0.0631	0.723467	-0.251068	0.400881	425	0.0201398	0.957205	15	HUMAN	P61106	Ras-related protein Rab-14	-1.31876	1.04471
7	3	-0.468	-0.0641	0.722966	-0.25513	0.399311	431	0.0200711	0.956542	7	HUMAN	O14782	Kinesin-like protein KIF3C	-1.32441	1.04543
12	6	-0.468	-0.0641	0.722966	-0.25513	0.399311	432	0.0200596	0.956542	12	HUMAN	P62701|Q8TD47|P22090	40S ribosomal protein S4, X isoform	-1.32441	1.04543
3	3	-0.469	-0.0651	0.722465	-0.259192	0.397744	437	0.0200023	0.955879	3	HUMAN	P98175	RNA-binding protein 10	-1.33009	1.04616
13	10	-0.469	-0.0651	0.722465	-0.259192	0.397744	438	0.0199908	0.955879	13	HUMAN	P05067	Amyloid beta A4 protein	-1.33009	1.04616
3	3	-0.47	-0.0661	0.721965	-0.263253	0.396178	441	0.0199564	0.955217	3	HUMAN	Q9NUQ2	1-acyl-sn-glycerol-3-phosphate acyltransferase epsilon	-1.33578	1.04688
11	5	-0.47	-0.0661	0.721965	-0.263253	0.396178	442	0.019945	0.955217	11	HUMAN	Q07955	Serine/arginine-rich splicing factor 1	-1.33578	1.04688
5	2	-0.471	-0.0671	0.721464	-0.267315	0.394613	446	0.0198991	0.954555	5	HUMAN	P25398	40S ribosomal protein S12	-1.34149	1.04761
2	2	-0.471	-0.0671	0.721464	-0.267315	0.394613	447	0.0198877	0.954555	2	HUMAN	Q6P1K2	Polyamine-modulated factor 1	-1.34149	1.04761
2	2	-0.471	-0.0671	0.721464	-0.267315	0.394613	448	0.0198762	0.954555	2	HUMAN	P46734	Dual specificity mitogen-activated protein kinase kinase 3	-1.34149	1.04761
8	5	-0.471	-0.0671	0.721464	-0.267315	0.394613	449	0.0198647	0.954555	8	HUMAN	O75874	Isocitrate dehydrogenase [NADP] cytoplasmic	-1.34149	1.04761
9	4	-0.472	-0.0681	0.720964	-0.271377	0.393051	453	0.0198189	0.953893	9	HUMAN	P46783|Q9NQ39	40S ribosomal protein S10	-1.34721	1.04834
24	8	-0.472	-0.0681	0.720964	-0.271377	0.393051	454	0.0198074	0.953893	24	HUMAN	P48449	Lanosterol synthase	-1.34721	1.04834
3	2	-0.473	-0.0691	0.720465	-0.275439	0.39149	456	0.0197845	0.953232	3	HUMAN	O00506|Q9P289	Serine/threonine-protein kinase 25	-1.35295	1.04906
2	2	-0.473	-0.0691	0.720465	-0.275439	0.39149	457	0.019773	0.953232	2	HUMAN	Q14520	Hyaluronan-binding protein 2	-1.35295	1.04906
2	2	-0.473	-0.0691	0.720465	-0.275439	0.39149	458	0.0197616	0.953232	2	HUMAN	P09417	Dihydropteridine reductase	-1.35295	1.04906
3	3	-0.473	-0.0691	0.720465	-0.275439	0.39149	459	0.0197501	0.953232	3	HUMAN	Q9NWH9	SAFB-like transcription modulator	-1.35295	1.04906
5	4	-0.473	-0.0691	0.720465	-0.275439	0.39149	460	0.0197387	0.953232	5	HUMAN	Q16880	2-hydroxyacylsphingosine 1-beta-galactosyltransferase	-1.35295	1.04906
13	6	-0.473	-0.0691	0.720465	-0.275439	0.39149	461	0.0197272	0.953232	13	HUMAN	P39023	60S ribosomal protein L3	-1.35295	1.04906
14	6	-0.473	-0.0691	0.720465	-0.275439	0.39149	462	0.0197157	0.953232	14	HUMAN	P08754	Guanine nucleotide-binding protein G(k) subunit alpha	-1.35295	1.04906
7	3	-0.474	-0.0701	0.719966	-0.2795	0.38993	469	0.0196355	0.952572	7	HUMAN	O14579	Coatomer subunit epsilon	-1.35871	1.04979
9	8	-0.474	-0.0701	0.719966	-0.2795	0.38993	470	0.019624	0.952572	9	HUMAN	P55268	Laminin subunit beta-2	-1.35871	1.04979
2	2	-0.475	-0.0711	0.719467	-0.283562	0.388373	476	0.0195552	0.951912	2	HUMAN	P15151	Poliovirus receptor	-1.36449	1.05052
2	2	-0.475	-0.0711	0.719467	-0.283562	0.388373	477	0.0195438	0.951912	2	HUMAN	P78318	Immunoglobulin-binding protein 1	-1.36449	1.05052
2	2	-0.475	-0.0711	0.719467	-0.283562	0.388373	478	0.0195323	0.951912	2	HUMAN	P62081	40S ribosomal protein S7	-1.36449	1.05052
3	2	-0.475	-0.0711	0.719467	-0.283562	0.388373	479	0.0195209	0.951912	3	HUMAN	P19021	Peptidyl-glycine alpha-amidating monooxygenase	-1.36449	1.05052
3	3	-0.475	-0.0711	0.719467	-0.283562	0.388373	480	0.0195094	0.951912	3	HUMAN	P04080	Cystatin-B	-1.36449	1.05052
12	5	-0.475	-0.0711	0.719467	-0.283562	0.388373	481	0.0194979	0.951912	12	HUMAN	Q9NR30|Q9BQ39	Nucleolar RNA helicase 2	-1.36449	1.05052
18	9	-0.475	-0.0711	0.719467	-0.283562	0.388373	482	0.0194865	0.951912	18	HUMAN	P23634	Plasma membrane calcium-transporting ATPase 4	-1.36449	1.05052
2	2	-0.476	-0.0721	0.718968	-0.287624	0.386817	484	0.0194635	0.951252	2	HUMAN	O43291	Kunitz-type protease inhibitor 2	-1.37028	1.05125
2	2	-0.476	-0.0721	0.718968	-0.287624	0.386817	485	0.0194521	0.951252	2	HUMAN	Q92871	Phosphomannomutase 1	-1.37028	1.05125
3	2	-0.476	-0.0721	0.718968	-0.287624	0.386817	486	0.0194406	0.951252	3	HUMAN	P30050	60S ribosomal protein L12	-1.37028	1.05125
4	3	-0.476	-0.0721	0.718968	-0.287624	0.386817	487	0.0194292	0.951252	4	HUMAN	P38606	V-type proton ATPase catalytic subunit A	-1.37028	1.05125
4	3	-0.476	-0.0721	0.718968	-0.287624	0.386817	488	0.0194177	0.951252	4	HUMAN	Q13505	Metaxin-1	-1.37028	1.05125
10	4	-0.476	-0.0721	0.718968	-0.287624	0.386817	489	0.0194062	0.951252	10	HUMAN	Q9H223	EH domain-containing protein 4	-1.37028	1.05125
13	8	-0.476	-0.0721	0.718968	-0.287624	0.386817	490	0.0193948	0.951252	13	HUMAN	P15924	Desmoplakin	-1.37028	1.05125
12	3	-0.477	-0.0731	0.71847	-0.291686	0.385264	492	0.0193718	0.950593	12	HUMAN	P61018|P20338	Ras-related protein Rab-4B	-1.37608	1.05197
5	2	-0.478	-0.0741	0.717972	-0.295747	0.383712	495	0.0193375	0.949935	5	HUMAN	P05388	60S acidic ribosomal protein P0	-1.38191	1.0527
4	4	-0.478	-0.0741	0.717972	-0.295747	0.383712	496	0.019326	0.949935	4	HUMAN	O75381	Peroxisomal membrane protein PEX14	-1.38191	1.0527
2	2	-0.479	-0.0751	0.717475	-0.299809	0.382161	501	0.0192687	0.949276	2	HUMAN	Q53EL6	Programmed cell death protein 4	-1.38775	1.05343
3	2	-0.479	-0.0751	0.717475	-0.299809	0.382161	502	0.0192572	0.949276	3	HUMAN	Q92890	Ubiquitin fusion degradation protein 1 homolog	-1.38775	1.05343
8	2	-0.48	-0.0761	0.716978	-0.303871	0.380613	509	0.019177	0.948619	8	HUMAN	P61421	V-type proton ATPase subunit d 1	-1.3936	1.05416
7	2	-0.48	-0.0761	0.716978	-0.303871	0.380613	510	0.0191655	0.948619	7	HUMAN	P00167	Cytochrome b5	-1.3936	1.05416
25	16	-0.48	-0.0761	0.716978	-0.303871	0.380613	511	0.0191541	0.948619	25	HUMAN	Q15075	Early endosome antigen 1	-1.3936	1.05416
6	4	-0.481	-0.0771	0.716481	-0.307933	0.379067	515	0.0191082	0.947961	6	HUMAN	Q9NTJ5	Phosphatidylinositide phosphatase SAC1	-1.39948	1.0549
5	4	-0.481	-0.0771	0.716481	-0.307933	0.379067	516	0.0190967	0.947961	5	HUMAN	Q15833	Syntaxin-binding protein 2	-1.39948	1.0549
27	12	-0.481	-0.0771	0.716481	-0.307933	0.379067	517	0.0190853	0.947961	27	HUMAN	P06753|P09493	Tropomyosin alpha-3 chain	-1.39948	1.0549
3	3	-0.482	-0.0781	0.715984	-0.311994	0.377522	521	0.0190394	0.947304	3	HUMAN	P49406	39S ribosomal protein L19, mitochondrial	-1.40537	1.05563
5	4	-0.482	-0.0781	0.715984	-0.311994	0.377522	522	0.019028	0.947304	5	HUMAN	P09960	Leukotriene A-4 hydrolase	-1.40537	1.05563
30	7	-0.482	-0.0781	0.715984	-0.311994	0.377522	523	0.0190165	0.947304	30	HUMAN	Q9H9B4	Sideroflexin-1	-1.40537	1.05563
3	2	-0.483	-0.0791	0.715488	-0.316056	0.37598	527	0.0189707	0.946648	3	HUMAN	P35222	Catenin beta-1	-1.41127	1.05636
2	2	-0.483	-0.0791	0.715488	-0.316056	0.37598	528	0.0189592	0.946648	2	HUMAN	P52701	DNA mismatch repair protein Msh6	-1.41127	1.05636
5	3	-0.483	-0.0791	0.715488	-0.316056	0.37598	529	0.0189477	0.946648	5	HUMAN	Q9BT09	Protein canopy homolog 3	-1.41127	1.05636
201	110	-0.483	-0.0791	0.715488	-0.316056	0.37598	530	0.0189363	0.946648	202	HUMAN	Q15149|P58107	Plectin	-1.41127	1.05636
12	3	-0.484	-0.0801	0.714992	-0.320118	0.37444	533	0.0189019	0.945992	12	HUMAN	P22695	Cytochrome b-c1 complex subunit 2, mitochondrial	-1.4172	1.05709
5	3	-0.484	-0.0801	0.714992	-0.320118	0.37444	534	0.0188904	0.945992	5	HUMAN	O95865	N(G),N(G)-dimethylarginine dimethylaminohydrolase 2	-1.4172	1.05709
10	5	-0.484	-0.0801	0.714992	-0.320118	0.37444	535	0.018879	0.945992	10	HUMAN	Q9ULC5	Long-chain-fatty-acid--CoA ligase 5	-1.4172	1.05709
15	7	-0.484	-0.0801	0.714992	-0.320118	0.37444	536	0.0188675	0.945992	15	HUMAN	Q92598	Heat shock protein 105 kDa	-1.4172	1.05709
2	2	-0.485	-0.0811	0.714497	-0.32418	0.372901	538	0.0188446	0.945337	2	HUMAN	O43598	Deoxyribonucleoside 5'-monophosphate N-glycosidase	-1.42314	1.05782
3	3	-0.485	-0.0811	0.714497	-0.32418	0.372901	539	0.0188331	0.945337	3	HUMAN	Q9NTZ6	RNA-binding protein 12	-1.42314	1.05782
4	3	-0.485	-0.0811	0.714497	-0.32418	0.372901	540	0.0188216	0.945337	4	HUMAN	P61313	60S ribosomal protein L15	-1.42314	1.05782
4	4	-0.485	-0.0811	0.714497	-0.32418	0.372901	541	0.0188102	0.945337	4	HUMAN	Q8IWJ2	GRIP and coiled-coil domain-containing protein 2	-1.42314	1.05782
7	5	-0.485	-0.0811	0.714497	-0.32418	0.372901	542	0.0187987	0.945337	7	HUMAN	O76021	Ribosomal L1 domain-containing protein 1	-1.42314	1.05782
5	2	-0.486	-0.0821	0.714002	-0.328241	0.371365	550	0.018707	0.944682	5	HUMAN	Q6UW02	Cytochrome P450 20A1	-1.42909	1.05856
2	2	-0.486	-0.0821	0.714002	-0.328241	0.371365	551	0.0186956	0.944682	2	HUMAN	O75683	Surfeit locus protein 6	-1.42909	1.05856
5	4	-0.486	-0.0821	0.714002	-0.328241	0.371365	552	0.0186841	0.944682	5	HUMAN	P53367	Arfaptin-1	-1.42909	1.05856
2	2	-0.487	-0.0831	0.713507	-0.332303	0.36983	553	0.0186726	0.944027	2	HUMAN	P48681	Nestin	-1.43506	1.05929
3	3	-0.487	-0.0831	0.713507	-0.332303	0.36983	554	0.0186612	0.944027	3	HUMAN	P61081	NEDD8-conjugating enzyme Ubc12	-1.43506	1.05929
4	3	-0.487	-0.0831	0.713507	-0.332303	0.36983	555	0.0186497	0.944027	4	HUMAN	O75306	NADH dehydrogenase [ubiquinone] iron-sulfur protein 2, mitochondrial	-1.43506	1.05929
2	2	-0.488	-0.0841	0.713013	-0.336365	0.368298	559	0.0186039	0.943373	2	HUMAN	P41227|Q9BSU3	N-alpha-acetyltransferase 10	-1.44105	1.06003
4	3	-0.488	-0.0841	0.713013	-0.336365	0.368298	560	0.0185924	0.943373	4	HUMAN	Q9UP95	Solute carrier family 12 member 4	-1.44105	1.06003
5	4	-0.488	-0.0841	0.713013	-0.336365	0.368298	561	0.0185809	0.943373	5	HUMAN	P48735	Isocitrate dehydrogenase [NADP], mitochondrial	-1.44105	1.06003
3	2	-0.489	-0.0851	0.712519	-0.340426	0.366768	568	0.0185007	0.942719	3	HUMAN	Q9Y5K8	V-type proton ATPase subunit D	-1.44706	1.06076
8	4	-0.489	-0.0851	0.712519	-0.340426	0.366768	569	0.0184892	0.942719	8	HUMAN	Q9NP81	Serine--tRNA ligase, mitochondrial	-1.44706	1.06076
5	4	-0.489	-0.0851	0.712519	-0.340426	0.366768	570	0.0184778	0.942719	5	HUMAN	Q9UQ35	Serine/arginine repetitive matrix protein 2	-1.44706	1.06076
32	17	-0.489	-0.0851	0.712519	-0.340426	0.366768	571	0.0184663	0.942719	32	HUMAN	P67936	Tropomyosin alpha-4 chain	-1.44706	1.06076
27	18	-0.49	-0.0861	0.712025	-0.344488	0.36524	576	0.018409	0.942066	27	HUMAN	P31948	Stress-induced-phosphoprotein 1	-1.45308	1.0615
7	4	-0.492	-0.0881	0.711039	-0.352612	0.36219	583	0.0183287	0.940761	7	HUMAN	Q93050	V-type proton ATPase 116 kDa subunit a isoform 1	-1.46518	1.06297
7	4	-0.492	-0.0881	0.711039	-0.352612	0.36219	584	0.0183173	0.940761	7	HUMAN	Q15738	Sterol-4-alpha-carboxylate 3-dehydrogenase, decarboxylating	-1.46518	1.06297
28	3	-0.493	-0.0891	0.710546	-0.356673	0.360668	587	0.0182829	0.940109	32	HUMAN	P23528|Q9Y281	Cofilin-1	-1.47126	1.06371
3	3	-0.493	-0.0891	0.710546	-0.356673	0.360668	588	0.0182714	0.940109	3	HUMAN	Q15436	Protein transport protein Sec23A	-1.47126	1.06371
5	4	-0.493	-0.0891	0.710546	-0.356673	0.360668	589	0.01826	0.940109	5	HUMAN	Q93034	Cullin-5	-1.47126	1.06371
2	2	-0.494	-0.0901	0.710054	-0.360735	0.359149	592	0.0182256	0.939458	2	HUMAN	P49755	Transmembrane emp24 domain-containing protein 10	-1.47735	1.06444
2	2	-0.494	-0.0901	0.710054	-0.360735	0.359149	593	0.0182141	0.939458	2	HUMAN	Q9NRR5	Ubiquilin-4	-1.47735	1.06444
7	4	-0.494	-0.0901	0.710054	-0.360735	0.359149	594	0.0182027	0.939458	7	HUMAN	P32119	Peroxiredoxin-2	-1.47735	1.06444
11	4	-0.494	-0.0901	0.710054	-0.360735	0.359149	595	0.0181912	0.939458	11	HUMAN	O94979	Protein transport protein Sec31A	-1.47735	1.06444
6	4	-0.494	-0.0901	0.710054	-0.360735	0.359149	596	0.0181797	0.939458	6	HUMAN	Q9UH65	Switch-associated protein 70	-1.47735	1.06444
2	2	-0.495	-0.0911	0.709562	-0.364797	0.357632	598	0.0181568	0.938807	2	HUMAN	P43490	Nicotinamide phosphoribosyltransferase	-1.48345	1.06518
13	3	-0.495	-0.0911	0.709562	-0.364797	0.357632	599	0.0181453	0.938807	13	HUMAN	P13693	Translationally-controlled tumor protein	-1.48345	1.06518
6	3	-0.495	-0.0911	0.709562	-0.364797	0.357632	600	0.0181339	0.938807	6	HUMAN	P62263	40S ribosomal protein S14	-1.48345	1.06518
58	18	-0.495	-0.0911	0.709562	-0.364797	0.357632	601	0.0181224	0.938807	58	HUMAN	P19367	Hexokinase-1	-1.48345	1.06518
2	2	-0.496	-0.0921	0.70907	-0.368859	0.356117	607	0.0180536	0.938156	2	HUMAN	Q5T440	Putative transferase CAF17, mitochondrial	-1.48958	1.06592
21	9	-0.496	-0.0921	0.70907	-0.368859	0.356117	608	0.0180422	0.938156	21	HUMAN	Q15907|P62491	Ras-related protein Rab-11B	-1.48958	1.06592
2	2	-0.497	-0.0931	0.708579	-0.37292	0.354604	612	0.0179963	0.937506	2	HUMAN	Q9NZJ7	Mitochondrial carrier homolog 1	-1.49572	1.06666
3	3	-0.497	-0.0931	0.708579	-0.37292	0.354604	613	0.0179849	0.937506	3	HUMAN	P54725	UV excision repair protein RAD23 homolog A	-1.49572	1.06666
2	2	-0.498	-0.0941	0.708088	-0.376982	0.353093	616	0.0179505	0.936857	2	HUMAN	Q7RTV0	PHD finger-like domain-containing protein 5A	-1.50188	1.0674
15	4	-0.498	-0.0941	0.708088	-0.376982	0.353093	617	0.017939	0.936857	15	HUMAN	P04844	Dolichyl-diphosphooligosaccharide--protein glycosyltransferase subunit 2	-1.50188	1.0674
12	7	-0.498	-0.0941	0.708088	-0.376982	0.353093	618	0.0179276	0.936857	12	HUMAN	P05198	Eukaryotic translation initiation factor 2 subunit 1	-1.50188	1.0674
3	2	-0.499	-0.0951	0.707597	-0.381044	0.351585	622	0.0178817	0.936207	3	HUMAN	Q9C037	Tripartite motif-containing protein 4	-1.50805	1.06814
3	2	-0.5	-0.0961	0.707107	-0.385106	0.35008	627	0.0178244	0.935559	3	HUMAN	Q92621	Nuclear pore complex protein Nup205	-1.51425	1.06888
6	2	-0.5	-0.0961	0.707107	-0.385106	0.35008	628	0.0178129	0.935559	6	HUMAN	Q96RS6	NudC domain-containing protein 1	-1.51425	1.06888
9	8	-0.5	-0.0961	0.707107	-0.385106	0.35008	629	0.0178015	0.935559	9	HUMAN	P20810	Calpastatin	-1.51425	1.06888
6	2	-0.501	-0.0971	0.706617	-0.389167	0.348576	636	0.0177212	0.93491	6	HUMAN	P07737	Profilin-1	-1.52045	1.06962
9	6	-0.501	-0.0971	0.706617	-0.389167	0.348576	637	0.0177098	0.93491	9	HUMAN	Q16740	Putative ATP-dependent Clp protease proteolytic subunit, mitochondrial	-1.52045	1.06962
3	2	-0.502	-0.0981	0.706127	-0.393229	0.347075	641	0.0176639	0.934263	3	HUMAN	Q02878	60S ribosomal protein L6	-1.52668	1.07036
2	2	-0.502	-0.0981	0.706127	-0.393229	0.347075	642	0.0176525	0.934263	2	HUMAN	Q6UW68	Transmembrane protein 205	-1.52668	1.07036
6	3	-0.502	-0.0981	0.706127	-0.393229	0.347075	643	0.017641	0.934263	6	HUMAN	Q6VY07	Phosphofurin acidic cluster sorting protein 1	-1.52668	1.07036
8	5	-0.502	-0.0981	0.706127	-0.393229	0.347075	644	0.0176295	0.934263	8	HUMAN	Q9P0J0	NADH dehydrogenase [ubiquinone] 1 alpha subcomplex subunit 13	-1.52668	1.07036
2	2	-0.503	-0.0991	0.705638	-0.397291	0.345577	652	0.0175378	0.933615	2	HUMAN	Q6KB66	Keratin, type II cytoskeletal 80	-1.53292	1.07111
3	3	-0.503	-0.0991	0.705638	-0.397291	0.345577	653	0.0175264	0.933615	3	HUMAN	Q8TCJ2	Dolichyl-diphosphooligosaccharide--protein glycosyltransferase subunit STT3B	-1.53292	1.07111
6	3	-0.503	-0.0991	0.705638	-0.397291	0.345577	654	0.0175149	0.933615	6	HUMAN	Q13435	Splicing factor 3B subunit 2	-1.53292	1.07111
4	3	-0.503	-0.0991	0.705638	-0.397291	0.345577	655	0.0175034	0.933615	4	HUMAN	P08134|P62745	Rho-related GTP-binding protein RhoC	-1.53292	1.07111
5	3	-0.503	-0.0991	0.705638	-0.397291	0.345577	656	0.017492	0.933615	5	HUMAN	Q14CX7	N-alpha-acetyltransferase 25, NatB auxiliary subunit	-1.53292	1.07111
15	5	-0.503	-0.0991	0.705638	-0.397291	0.345577	657	0.0174805	0.933615	15	HUMAN	P29218	Inositol monophosphatase 1	-1.53292	1.07111
8	7	-0.503	-0.0991	0.705638	-0.397291	0.345577	658	0.0174691	0.933615	8	HUMAN	P21281|P15313	V-type proton ATPase subunit B, brain isoform	-1.53292	1.07111
2	2	-0.504	-0.1001	0.705149	-0.401353	0.34408	663	0.0174117	0.932968	2	HUMAN	Q9HCE1	Putative helicase MOV-10	-1.53918	1.07185
2	2	-0.504	-0.1001	0.705149	-0.401353	0.34408	664	0.0174003	0.932968	2	HUMAN	Q9NZQ3	NCK-interacting protein with SH3 domain	-1.53918	1.07185
7	3	-0.504	-0.1001	0.705149	-0.401353	0.34408	665	0.0173888	0.932968	7	HUMAN	P27105	Erythrocyte band 7 integral membrane protein	-1.53918	1.07185
6	4	-0.504	-0.1001	0.705149	-0.401353	0.34408	666	0.0173773	0.932968	6	HUMAN	Q6PKG0	La-related protein 1	-1.53918	1.07185
37	14	-0.504	-0.1001	0.705149	-0.401353	0.34408	667	0.0173659	0.932968	37	HUMAN	Q14254	Flotillin-2	-1.53918	1.07185
5	3	-0.505	-0.1011	0.70466	-0.405414	0.342587	672	0.0173086	0.932322	5	HUMAN	Q16134	Electron transfer flavoprotein-ubiquinone oxidoreductase, mitochondrial	-1.54546	1.07259
3	2	-0.506	-0.1021	0.704172	-0.409476	0.341095	679	0.0172283	0.931676	3	HUMAN	Q92900	Regulator of nonsense transcripts 1	-1.55175	1.07333
2	2	-0.506	-0.1021	0.704172	-0.409476	0.341095	680	0.0172169	0.931676	2	HUMAN	P35251	Replication factor C subunit 1	-1.55175	1.07333
8	6	-0.506	-0.1021	0.704172	-0.409476	0.341095	681	0.0172054	0.931676	8	HUMAN	P49189	4-trimethylaminobutyraldehyde dehydrogenase	-1.55175	1.07333
9	7	-0.506	-0.1021	0.704172	-0.409476	0.341095	682	0.0171939	0.931676	9	HUMAN	Q06830	Peroxiredoxin-1	-1.55175	1.07333
20	9	-0.506	-0.1021	0.704172	-0.409476	0.341095	683	0.0171825	0.931676	20	HUMAN	Q86UE4	Protein LYRIC	-1.55175	1.07333
10	9	-0.506	-0.1021	0.704172	-0.409476	0.341095	684	0.017171	0.931676	10	HUMAN	Q08209|P16298|P48454	Serine/threonine-protein phosphatase 2B catalytic subunit alpha isoform	-1.55175	1.07333
5	3	-0.507	-0.1031	0.703684	-0.413538	0.339606	687	0.0171366	0.93103	5	HUMAN	P62993	Growth factor receptor-bound protein 2	-1.55806	1.07408
4	3	-0.507	-0.1031	0.703684	-0.413538	0.339606	688	0.0171252	0.93103	4	HUMAN	Q86VR2	Protein FAM134C	-1.55806	1.07408
3	3	-0.509	-0.1051	0.702709	-0.421661	0.336636	695	0.0170449	0.92974	3	HUMAN	Q9NQW7	Xaa-Pro aminopeptidase 1	-1.57074	1.07557
5	4	-0.511	-0.1071	0.701736	-0.429785	0.333676	708	0.0168959	0.928452	5	HUMAN	Q96HY6	DDRGK domain-containing protein 1	-1.58348	1.07706
45	18	-0.511	-0.1071	0.701736	-0.429785	0.333676	709	0.0168845	0.928452	45	HUMAN	Q9Y4L1	Hypoxia up-regulated protein 1	-1.58348	1.07706
2	2	-0.512	-0.1081	0.70125	-0.433846	0.3322	714	0.0168271	0.927809	2	HUMAN	Q8IZA0	Dyslexia-associated protein KIAA0319-like protein	-1.58988	1.07781
11	5	-0.512	-0.1081	0.70125	-0.433846	0.3322	715	0.0168157	0.927809	11	HUMAN	P29966	Myristoylated alanine-rich C-kinase substrate	-1.58988	1.07781
2	2	-0.513	-0.1091	0.700764	-0.437908	0.330726	719	0.0167698	0.927166	2	HUMAN	Q15397	Pumilio domain-containing protein KIAA0020	-1.59629	1.07856
3	3	-0.513	-0.1091	0.700764	-0.437908	0.330726	720	0.0167584	0.927166	3	HUMAN	Q969T9	WW domain-binding protein 2	-1.59629	1.07856
20	6	-0.513	-0.1091	0.700764	-0.437908	0.330726	721	0.0167469	0.927166	20	HUMAN	Q9BWM7	Sideroflexin-3	-1.59629	1.07856
5	3	-0.514	-0.1101	0.700278	-0.44197	0.329255	727	0.0166781	0.926524	5	HUMAN	Q7Z4V5	Hepatoma-derived growth factor-related protein 2	-1.60272	1.0793
3	3	-0.514	-0.1101	0.700278	-0.44197	0.329255	728	0.0166667	0.926524	3	HUMAN	O94901	SUN domain-containing protein 1	-1.60272	1.0793
8	5	-0.514	-0.1101	0.700278	-0.44197	0.329255	729	0.0166552	0.926524	8	HUMAN	Q9GZT6	Coiled-coil domain-containing protein 90B, mitochondrial	-1.60272	1.0793
3	2	-0.515	-0.1111	0.699793	-0.446032	0.327787	733	0.0166094	0.925882	3	HUMAN	Q15631	Translin	-1.60917	1.08005
3	2	-0.515	-0.1111	0.699793	-0.446032	0.327787	734	0.0165979	0.925882	3	HUMAN	Q07021	Complement component 1 Q subcomponent-binding protein, mitochondrial	-1.60917	1.08005
8	3	-0.515	-0.1111	0.699793	-0.446032	0.327787	735	0.0165864	0.925882	8	HUMAN	Q12846	Syntaxin-4	-1.60917	1.08005
5	4	-0.515	-0.1111	0.699793	-0.446032	0.327787	736	0.016575	0.925882	5	HUMAN	Q27J81	Inverted formin-2	-1.60917	1.08005
2	2	-0.516	-0.1121	0.699308	-0.450093	0.326322	742	0.0165062	0.92524	2	HUMAN	Q9H3K6	BolA-like protein 2	-1.61563	1.0808
4	2	-0.516	-0.1121	0.699308	-0.450093	0.326322	743	0.0164947	0.92524	4	HUMAN	P82673	28S ribosomal protein S35, mitochondrial	-1.61563	1.0808
2	2	-0.516	-0.1121	0.699308	-0.450093	0.326322	744	0.0164833	0.92524	2	HUMAN	Q68CZ2|Q9HBL0|Q63HR2	Tensin-3	-1.61563	1.0808
6	3	-0.516	-0.1121	0.699308	-0.450093	0.326322	745	0.0164718	0.92524	6	HUMAN	P10644	cAMP-dependent protein kinase type I-alpha regulatory subunit	-1.61563	1.0808
9	3	-0.516	-0.1121	0.699308	-0.450093	0.326322	746	0.0164603	0.92524	9	HUMAN	O75436	Vacuolar protein sorting-associated protein 26A	-1.61563	1.0808
4	3	-0.516	-0.1121	0.699308	-0.450093	0.326322	747	0.0164489	0.92524	4	HUMAN	Q9Y295	Developmentally-regulated GTP-binding protein 1	-1.61563	1.0808
10	4	-0.516	-0.1121	0.699308	-0.450093	0.326322	748	0.0164374	0.92524	10	HUMAN	Q9Y2B0	Protein canopy homolog 2	-1.61563	1.0808
6	5	-0.516	-0.1121	0.699308	-0.450093	0.326322	749	0.016426	0.92524	6	HUMAN	P29590	Protein PML	-1.61563	1.0808
10	4	-0.517	-0.1131	0.698823	-0.454155	0.324859	754	0.0163686	0.924599	10	HUMAN	P82650	28S ribosomal protein S22, mitochondrial	-1.62212	1.08155
4	2	-0.518	-0.1141	0.698339	-0.458217	0.323398	762	0.0162769	0.923959	4	HUMAN	O43818	U3 small nucleolar RNA-interacting protein 2	-1.62862	1.0823
2	2	-0.52	-0.1161	0.697372	-0.46634	0.320486	768	0.0162082	0.922679	2	HUMAN	O95721	Synaptosomal-associated protein 29	-1.64167	1.0838
2	2	-0.521	-0.1171	0.696889	-0.470402	0.319034	773	0.0161508	0.922039	2	HUMAN	P30520	Adenylosuccinate synthetase isozyme 2	-1.64822	1.08455
21	3	-0.521	-0.1171	0.696889	-0.470402	0.319034	774	0.0161394	0.922039	21	HUMAN	P62750	60S ribosomal protein L23a	-1.64822	1.08455
5	4	-0.521	-0.1171	0.696889	-0.470402	0.319034	775	0.0161279	0.922039	5	HUMAN	Q99829	Copine-1	-1.64822	1.08455
2	2	-0.522	-0.1181	0.696406	-0.474464	0.317585	780	0.0160706	0.9214	2	HUMAN	Q16775	Hydroxyacylglutathione hydrolase, mitochondrial	-1.65479	1.0853
2	2	-0.522	-0.1181	0.696406	-0.474464	0.317585	781	0.0160591	0.9214	2	HUMAN	O60888	Protein CutA	-1.65479	1.0853
7	3	-0.522	-0.1181	0.696406	-0.474464	0.317585	782	0.0160477	0.9214	7	HUMAN	Q01105	Protein SET	-1.65479	1.0853
2	2	-0.523	-0.1191	0.695923	-0.478526	0.316138	787	0.0159904	0.920762	2	HUMAN	Q9UBB5	Methyl-CpG-binding domain protein 2	-1.66137	1.08606
4	3	-0.523	-0.1191	0.695923	-0.478526	0.316138	788	0.0159789	0.920762	4	HUMAN	Q8NCN5	Pyruvate dehydrogenase phosphatase regulatory subunit, mitochondrial	-1.66137	1.08606
17	4	-0.523	-0.1191	0.695923	-0.478526	0.316138	789	0.0159674	0.920762	17	HUMAN	P10599	Thioredoxin	-1.66137	1.08606
3	3	-0.524	-0.1201	0.695441	-0.482587	0.314694	793	0.0159216	0.920124	3	HUMAN	Q8WU90	Zinc finger CCCH domain-containing protein 15	-1.66798	1.08681
4	4	-0.524	-0.1201	0.695441	-0.482587	0.314694	794	0.0159101	0.920124	4	HUMAN	P18084	Integrin beta-5	-1.66798	1.08681
3	2	-0.525	-0.1211	0.694959	-0.486649	0.313254	800	0.0158414	0.919486	3	HUMAN	Q9BV40	Vesicle-associated membrane protein 8	-1.6746	1.08756
2	2	-0.525	-0.1211	0.694959	-0.486649	0.313254	801	0.0158299	0.919486	2	HUMAN	Q494V2	Coiled-coil domain-containing protein 37	-1.6746	1.08756
3	3	-0.525	-0.1211	0.694959	-0.486649	0.313254	802	0.0158184	0.919486	3	HUMAN	Q96JJ3	Engulfment and cell motility protein 2	-1.6746	1.08756
9	8	-0.525	-0.1211	0.694959	-0.486649	0.313254	803	0.015807	0.919486	9	HUMAN	P49792|O14715|Q99666|A6NKT7|Q7Z3J3|P0DJD1|P0DJD0	E3 SUMO-protein ligase RanBP2	-1.6746	1.08756
9	2	-0.526	-0.1221	0.694478	-0.490711	0.311816	807	0.0157611	0.918849	9	HUMAN	P39656	Dolichyl-diphosphooligosaccharide--protein glycosyltransferase 48 kDa subunit	-1.68124	1.08832
4	2	-0.526	-0.1221	0.694478	-0.490711	0.311816	808	0.0157497	0.918849	4	HUMAN	Q9UI30	tRNA methyltransferase 112 homolog	-1.68124	1.08832
8	3	-0.526	-0.1221	0.694478	-0.490711	0.311816	809	0.0157382	0.918849	8	HUMAN	P31949	Protein S100-A11	-1.68124	1.08832
11	3	-0.526	-0.1221	0.694478	-0.490711	0.311816	810	0.0157267	0.918849	11	HUMAN	Q9UL46	Proteasome activator complex subunit 2	-1.68124	1.08832
3	3	-0.526	-0.1221	0.694478	-0.490711	0.311816	811	0.0157153	0.918849	3	HUMAN	P11441	Ubiquitin-like protein 4A	-1.68124	1.08832
6	5	-0.526	-0.1221	0.694478	-0.490711	0.311816	812	0.0157038	0.918849	6	HUMAN	Q5JTZ9	Alanine--tRNA ligase, mitochondrial	-1.68124	1.08832
16	10	-0.526	-0.1221	0.694478	-0.490711	0.311816	813	0.0156923	0.918849	16	HUMAN	P07942	Laminin subunit beta-1	-1.68124	1.08832
15	11	-0.526	-0.1221	0.694478	-0.490711	0.311816	814	0.0156809	0.918849	15	HUMAN	Q14247	Src substrate cortactin	-1.68124	1.08832
5	3	-0.527	-0.1231	0.693996	-0.494773	0.31038	816	0.015658	0.918213	5	HUMAN	P36578	60S ribosomal protein L4	-1.68789	1.08907
12	7	-0.527	-0.1231	0.693996	-0.494773	0.31038	817	0.0156465	0.918213	12	HUMAN	Q9H4M9|Q9NZN3	EH domain-containing protein 1	-1.68789	1.08907
5	4	-0.528	-0.1241	0.693515	-0.498834	0.308948	823	0.0155777	0.917576	5	HUMAN	Q6PI48	Aspartate--tRNA ligase, mitochondrial	-1.69456	1.08983
26	8	-0.528	-0.1241	0.693515	-0.498834	0.308948	824	0.0155663	0.917576	26	HUMAN	O75955	Flotillin-1	-1.69456	1.08983
3	2	-0.529	-0.1251	0.693035	-0.502896	0.307519	830	0.0154975	0.91694	3	HUMAN	Q96G23	Ceramide synthase 2	-1.70125	1.09058
3	2	-0.529	-0.1251	0.693035	-0.502896	0.307519	831	0.015486	0.91694	3	HUMAN	Q2NL82	Pre-rRNA-processing protein TSR1 homolog	-1.70125	1.09058
5	3	-0.529	-0.1251	0.693035	-0.502896	0.307519	832	0.0154746	0.91694	5	HUMAN	Q99614	Tetratricopeptide repeat protein 1	-1.70125	1.09058
3	3	-0.529	-0.1251	0.693035	-0.502896	0.307519	833	0.0154631	0.91694	3	HUMAN	Q02880	DNA topoisomerase 2-beta	-1.70125	1.09058
7	6	-0.529	-0.1251	0.693035	-0.502896	0.307519	834	0.0154516	0.91694	7	HUMAN	O60645	Exocyst complex component 3	-1.70125	1.09058
5	2	-0.53	-0.1261	0.692555	-0.506958	0.306092	841	0.0153714	0.916305	5	HUMAN	O95169	NADH dehydrogenase [ubiquinone] 1 beta subcomplex subunit 8, mitochondrial	-1.70796	1.09134
3	3	-0.53	-0.1261	0.692555	-0.506958	0.306092	842	0.0153599	0.916305	3	HUMAN	P26572	Alpha-1,3-mannosyl-glycoprotein 2-beta-N-acetylglucosaminyltransferase	-1.70796	1.09134
10	7	-0.53	-0.1261	0.692555	-0.506958	0.306092	843	0.0153485	0.916305	10	HUMAN	Q9BR76	Coronin-1B	-1.70796	1.09134
2	2	-0.531	-0.1271	0.692075	-0.511019	0.304669	846	0.0153141	0.91567	2	HUMAN	Q9UNK0	Syntaxin-8	-1.71469	1.0921
5	3	-0.531	-0.1271	0.692075	-0.511019	0.304669	847	0.0153026	0.91567	5	HUMAN	Q9NR46	Endophilin-B2	-1.71469	1.0921
6	3	-0.531	-0.1271	0.692075	-0.511019	0.304669	848	0.0152912	0.91567	6	HUMAN	P07711	Cathepsin L1	-1.71469	1.0921
4	3	-0.531	-0.1271	0.692075	-0.511019	0.304669	849	0.0152797	0.91567	4	HUMAN	P22681	E3 ubiquitin-protein ligase CBL	-1.71469	1.0921
4	3	-0.532	-0.1281	0.691595	-0.515081	0.303248	858	0.0151765	0.915036	4	HUMAN	P11137	Microtubule-associated protein 2	-1.72143	1.09285
13	4	-0.532	-0.1281	0.691595	-0.515081	0.303248	859	0.0151651	0.915036	13	HUMAN	P50502|Q8NFI4|Q8IZP2	Hsc70-interacting protein	-1.72143	1.09285
24	14	-0.532	-0.1281	0.691595	-0.515081	0.303248	860	0.0151536	0.915036	24	HUMAN	P08727	Keratin, type I cytoskeletal 19	-1.72143	1.09285
4	3	-0.533	-0.1291	0.691116	-0.519143	0.301831	864	0.0151077	0.914402	4	HUMAN	Q15642	Cdc42-interacting protein 4	-1.72819	1.09361
15	7	-0.533	-0.1291	0.691116	-0.519143	0.301831	865	0.0150963	0.914402	15	HUMAN	O00330	Pyruvate dehydrogenase protein X component, mitochondrial	-1.72819	1.09361
2	2	-0.535	-0.1311	0.690159	-0.527266	0.299004	876	0.0149702	0.913135	2	HUMAN	Q8WX92	Negative elongation factor B	-1.74176	1.09513
12	7	-0.536	-0.1321	0.68968	-0.531328	0.297596	880	0.0149243	0.912502	12	HUMAN	Q9Y678	Coatomer subunit gamma-1	-1.74857	1.09589
3	2	-0.537	-0.1331	0.689203	-0.53539	0.29619	881	0.0149129	0.91187	3	HUMAN	P21796	Voltage-dependent anion-selective channel protein 1	-1.7554	1.09665
3	2	-0.537	-0.1331	0.689203	-0.53539	0.29619	882	0.0149014	0.91187	3	HUMAN	P46782	40S ribosomal protein S5	-1.7554	1.09665
2	2	-0.537	-0.1331	0.689203	-0.53539	0.29619	883	0.01489	0.91187	2	HUMAN	O95359	Transforming acidic coiled-coil-containing protein 2	-1.7554	1.09665
2	2	-0.538	-0.1341	0.688725	-0.539452	0.294788	884	0.0148785	0.911238	2	HUMAN	O00479	High mobility group nucleosome-binding domain-containing protein 4	-1.76225	1.09741
2	2	-0.538	-0.1341	0.688725	-0.539452	0.294788	885	0.014867	0.911238	2	HUMAN	O95602	DNA-directed RNA polymerase I subunit RPA1	-1.76225	1.09741
7	3	-0.538	-0.1341	0.688725	-0.539452	0.294788	886	0.0148556	0.911238	7	HUMAN	P52907	F-actin-capping protein subunit alpha-1	-1.76225	1.09741
5	3	-0.538	-0.1341	0.688725	-0.539452	0.294788	887	0.0148441	0.911238	5	HUMAN	Q96DV4	39S ribosomal protein L38, mitochondrial	-1.76225	1.09741
3	3	-0.538	-0.1341	0.688725	-0.539452	0.294788	888	0.0148326	0.911238	3	HUMAN	Q13393	Phospholipase D1	-1.76225	1.09741
2	2	-0.541	-0.1371	0.687294	-0.551637	0.290599	898	0.014718	0.909345	2	HUMAN	Q15014	Mortality factor 4-like protein 2	-1.7829	1.09969
14	4	-0.541	-0.1371	0.687294	-0.551637	0.290599	899	0.0147066	0.909345	14	HUMAN	Q9BTV4	Transmembrane protein 43	-1.7829	1.09969
4	2	-0.542	-0.1381	0.686818	-0.555699	0.289208	905	0.0146378	0.908715	4	HUMAN	Q6PI78	Transmembrane protein 65	-1.78982	1.10045
4	3	-0.542	-0.1381	0.686818	-0.555699	0.289208	906	0.0146263	0.908715	4	HUMAN	Q5H9R7	Serine/threonine-protein phosphatase 6 regulatory subunit 3	-1.78982	1.10045
7	5	-0.543	-0.1391	0.686342	-0.55976	0.287821	916	0.0145117	0.908085	7	HUMAN	O95470	Sphingosine-1-phosphate lyase 1	-1.79675	1.10122
77	19	-0.543	-0.1391	0.686342	-0.55976	0.287821	917	0.0145002	0.908085	77	HUMAN	P38646	Stress-70 protein, mitochondrial	-1.79675	1.10122
4	2	-0.544	-0.1401	0.685867	-0.563822	0.286438	924	0.01442	0.907456	4	HUMAN	Q9BU23	Lipase maturation factor 2	-1.80371	1.10198
9	7	-0.545	-0.1411	0.685391	-0.567884	0.285057	926	0.0143971	0.906827	9	HUMAN	Q8WZ42	Titin	-1.81068	1.10275
5	2	-0.546	-0.1421	0.684916	-0.571946	0.283679	928	0.0143741	0.906199	5	HUMAN	P61204|P84077	ADP-ribosylation factor 3	-1.81767	1.10351
3	2	-0.546	-0.1421	0.684916	-0.571946	0.283679	929	0.0143627	0.906199	3	HUMAN	P36969	Phospholipid hydroperoxide glutathione peroxidase, mitochondrial	-1.81767	1.10351
2	2	-0.547	-0.1431	0.684442	-0.576007	0.282305	934	0.0143054	0.905571	2	HUMAN	Q12888	Tumor suppressor p53-binding protein 1	-1.82467	1.10428
2	2	-0.547	-0.1431	0.684442	-0.576007	0.282305	935	0.0142939	0.905571	2	HUMAN	Q5JXB2|P61088	Ubiquitin-conjugating enzyme E2 N	-1.82467	1.10428
27	14	-0.547	-0.1431	0.684442	-0.576007	0.282305	936	0.0142824	0.905571	27	HUMAN	P27824	Calnexin	-1.82467	1.10428
5	2	-0.548	-0.1441	0.683968	-0.580069	0.280934	938	0.0142595	0.904944	5	HUMAN	Q9BYC9	39S ribosomal protein L20, mitochondrial	-1.8317	1.10504
4	2	-0.548	-0.1441	0.683968	-0.580069	0.280934	939	0.0142481	0.904944	4	HUMAN	Q5BJH7	Protein YIF1B	-1.8317	1.10504
2	2	-0.548	-0.1441	0.683968	-0.580069	0.280934	940	0.0142366	0.904944	2	HUMAN	P62633	Cellular nucleic acid-binding protein	-1.8317	1.10504
9	3	-0.548	-0.1441	0.683968	-0.580069	0.280934	941	0.0142251	0.904944	9	HUMAN	Q8WUY1	UPF0670 protein C8orf55	-1.8317	1.10504
4	3	-0.549	-0.1451	0.683494	-0.584131	0.279566	945	0.0141793	0.904317	4	HUMAN	Q9H4L5	Oxysterol-binding protein-related protein 3	-1.83874	1.10581
110	21	-0.549	-0.1451	0.683494	-0.584131	0.279566	946	0.0141678	0.904317	110	HUMAN	P11021	78 kDa glucose-regulated protein	-1.83874	1.10581
2	2	-0.55	-0.1461	0.68302	-0.588193	0.278202	952	0.014099	0.90369	2	HUMAN	Q07954	Prolow-density lipoprotein receptor-related protein 1	-1.8458	1.10657
8	4	-0.55	-0.1461	0.68302	-0.588193	0.278202	953	0.0140876	0.90369	8	HUMAN	Q9HCC0	Methylcrotonoyl-CoA carboxylase beta chain, mitochondrial	-1.8458	1.10657
3	2	-0.552	-0.1481	0.682074	-0.596316	0.275482	959	0.0140188	0.902438	3	HUMAN	Q16718	NADH dehydrogenase [ubiquinone] 1 alpha subcomplex subunit 5	-1.85997	1.10811
6	3	-0.552	-0.1481	0.682074	-0.596316	0.275482	960	0.0140073	0.902438	6	HUMAN	Q16762	Thiosulfate sulfurtransferase	-1.85997	1.10811
4	4	-0.552	-0.1481	0.682074	-0.596316	0.275482	961	0.0139959	0.902438	4	HUMAN	P22102	Trifunctional purine biosynthetic protein adenosine-3	-1.85997	1.10811
4	2	-0.553	-0.1491	0.681601	-0.600378	0.274127	966	0.0139386	0.901813	4	HUMAN	Q15003	Condensin complex subunit 2	-1.86708	1.10888
4	3	-0.553	-0.1491	0.681601	-0.600378	0.274127	967	0.0139271	0.901813	4	HUMAN	Q96CT7	Coiled-coil domain-containing protein 124	-1.86708	1.10888
3	3	-0.553	-0.1491	0.681601	-0.600378	0.274127	968	0.0139156	0.901813	3	HUMAN	Q9UJ70	N-acetyl-D-glucosamine kinase	-1.86708	1.10888
4	3	-0.553	-0.1491	0.681601	-0.600378	0.274127	969	0.0139042	0.901813	4	HUMAN	O00401	Neural Wiskott-Aldrich syndrome protein	-1.86708	1.10888
3	2	-0.554	-0.1501	0.681129	-0.604439	0.272776	972	0.0138698	0.901188	3	HUMAN	Q9BYT8	Neurolysin, mitochondrial	-1.87421	1.10965
8	3	-0.554	-0.1501	0.681129	-0.604439	0.272776	973	0.0138583	0.901188	8	HUMAN	O00154	Cytosolic acyl coenzyme A thioester hydrolase	-1.87421	1.10965
4	3	-0.554	-0.1501	0.681129	-0.604439	0.272776	974	0.0138469	0.901188	4	HUMAN	O60832	H/ACA ribonucleoprotein complex subunit 4	-1.87421	1.10965
7	6	-0.554	-0.1501	0.681129	-0.604439	0.272776	975	0.0138354	0.901188	7	HUMAN	Q92614	Unconventional myosin-XVIIIa	-1.87421	1.10965
6	2	-0.555	-0.1511	0.680657	-0.608501	0.271428	979	0.0137895	0.900564	6	HUMAN	Q13277	Syntaxin-3	-1.88136	1.11042
2	2	-0.555	-0.1511	0.680657	-0.608501	0.271428	980	0.0137781	0.900564	2	HUMAN	Q9UKV8|Q9UL18	Protein argonaute-2	-1.88136	1.11042
4	2	-0.555	-0.1511	0.680657	-0.608501	0.271428	981	0.0137666	0.900564	4	HUMAN	Q92552	28S ribosomal protein S27, mitochondrial	-1.88136	1.11042
9	5	-0.555	-0.1511	0.680657	-0.608501	0.271428	982	0.0137552	0.900564	9	HUMAN	P62906	60S ribosomal protein L10a	-1.88136	1.11042
2	2	-0.556	-0.1521	0.680185	-0.612563	0.270083	990	0.0136635	0.89994	2	HUMAN	Q9NYL9	Tropomodulin-3	-1.88853	1.11119
5	3	-0.556	-0.1521	0.680185	-0.612563	0.270083	991	0.013652	0.89994	5	HUMAN	Q99567	Nuclear pore complex protein Nup88	-1.88853	1.11119
5	5	-0.556	-0.1521	0.680185	-0.612563	0.270083	992	0.0136405	0.89994	5	HUMAN	O75937	DnaJ homolog subfamily C member 8	-1.88853	1.11119
42	25	-0.556	-0.1521	0.680185	-0.612563	0.270083	993	0.0136291	0.89994	42	HUMAN	P42704	Leucine-rich PPR motif-containing protein, mitochondrial	-1.88853	1.11119
3	2	-0.557	-0.1531	0.679714	-0.616625	0.268741	998	0.0135718	0.899316	3	HUMAN	O75531	Barrier-to-autointegration factor	-1.89571	1.11196
3	3	-0.557	-0.1531	0.679714	-0.616625	0.268741	999	0.0135603	0.899316	3	HUMAN	Q15021	Condensin complex subunit 1	-1.89571	1.11196
8	6	-0.557	-0.1531	0.679714	-0.616625	0.268741	1000	0.0135488	0.899316	8	HUMAN	Q8TCS8	Polyribonucleotide nucleotidyltransferase 1, mitochondrial	-1.89571	1.11196
46	16	-0.557	-0.1531	0.679714	-0.616625	0.268741	1001	0.0135374	0.899316	48	HUMAN	P05787|O95678	Keratin, type II cytoskeletal 8	-1.89571	1.11196
3	2	-0.558	-0.1541	0.679243	-0.620686	0.267403	1006	0.0134801	0.898693	3	HUMAN	O43252	Bifunctional 3'-phosphoadenosine 5'-phosphosulfate synthase 1	-1.90291	1.11273
16	6	-0.558	-0.1541	0.679243	-0.620686	0.267403	1007	0.0134686	0.898693	16	HUMAN	P05362	Intercellular adhesion molecule 1	-1.90291	1.11273
6	5	-0.559	-0.1551	0.678772	-0.624748	0.266068	1013	0.0133998	0.89807	6	HUMAN	P13489	Ribonuclease inhibitor	-1.91013	1.1135
8	6	-0.559	-0.1551	0.678772	-0.624748	0.266068	1014	0.0133884	0.89807	8	HUMAN	P30519	Heme oxygenase 2	-1.91013	1.1135
3	2	-0.56	-0.1561	0.678302	-0.62881	0.264737	1021	0.0133081	0.897448	3	HUMAN	P50479	PDZ and LIM domain protein 4	-1.91737	1.11427
2	2	-0.56	-0.1561	0.678302	-0.62881	0.264737	1022	0.0132967	0.897448	2	HUMAN	Q9NVT9	Armadillo repeat-containing protein 1	-1.91737	1.11427
5	3	-0.56	-0.1561	0.678302	-0.62881	0.264737	1023	0.0132852	0.897448	5	HUMAN	P19013	Keratin, type II cytoskeletal 4	-1.91737	1.11427
8	6	-0.56	-0.1561	0.678302	-0.62881	0.264737	1024	0.0132737	0.897448	8	HUMAN	Q9UNF0	Protein kinase C and casein kinase substrate in neurons protein 2	-1.91737	1.11427
2	2	-0.561	-0.1571	0.677832	-0.632872	0.263409	1026	0.0132508	0.896826	2	HUMAN	P17568	NADH dehydrogenase [ubiquinone] 1 beta subcomplex subunit 7	-1.92462	1.11504
4	2	-0.561	-0.1571	0.677832	-0.632872	0.263409	1027	0.0132393	0.896826	4	HUMAN	P26022	Pentraxin-related protein PTX3	-1.92462	1.11504
3	2	-0.561	-0.1571	0.677832	-0.632872	0.263409	1028	0.0132279	0.896826	3	HUMAN	Q96CS3	FAS-associated factor 2	-1.92462	1.11504
8	5	-0.561	-0.1571	0.677832	-0.632872	0.263409	1029	0.0132164	0.896826	8	HUMAN	Q9H3S7	Tyrosine-protein phosphatase non-receptor type 23	-1.92462	1.11504
3	2	-0.562	-0.1581	0.677362	-0.636933	0.262084	1032	0.013182	0.896205	3	HUMAN	P18669	Phosphoglycerate mutase 1	-1.9319	1.11582
3	2	-0.562	-0.1581	0.677362	-0.636933	0.262084	1033	0.0131706	0.896205	3	HUMAN	P13995	Bifunctional methylenetetrahydrofolate dehydrogenase/cyclohydrolase, mitochondrial	-1.9319	1.11582
2	2	-0.562	-0.1581	0.677362	-0.636933	0.262084	1034	0.0131591	0.896205	2	HUMAN	Q99417	C-Myc-binding protein	-1.9319	1.11582
2	2	-0.564	-0.1601	0.676424	-0.645057	0.259445	1045	0.013033	0.894963	2	HUMAN	Q9UPT5	Exocyst complex component 7	-1.9465	1.11736
6	3	-0.565	-0.1611	0.675955	-0.649119	0.258131	1048	0.0129986	0.894343	6	HUMAN	P22061	Protein-L-isoaspartate(D-aspartate) O-methyltransferase	-1.95383	1.11814
12	5	-0.565	-0.1611	0.675955	-0.649119	0.258131	1049	0.0129872	0.894343	12	HUMAN	P06396	Gelsolin	-1.95383	1.11814
3	3	-0.567	-0.1631	0.675019	-0.657242	0.255513	1054	0.0129298	0.893104	3	HUMAN	Q16881	Thioredoxin reductase 1, cytoplasmic	-1.96853	1.11969
3	3	-0.567	-0.1631	0.675019	-0.657242	0.255513	1055	0.0129184	0.893104	3	HUMAN	P36543|Q96A05	V-type proton ATPase subunit E 1	-1.96853	1.11969
8	4	-0.567	-0.1631	0.675019	-0.657242	0.255513	1056	0.0129069	0.893104	8	HUMAN	O95168	NADH dehydrogenase [ubiquinone] 1 beta subcomplex subunit 4	-1.96853	1.11969
9	5	-0.567	-0.1631	0.675019	-0.657242	0.255513	1057	0.0128955	0.893104	9	HUMAN	Q96G03	Phosphoglucomutase-2	-1.96853	1.11969
3	3	-0.568	-0.1641	0.674551	-0.661304	0.254209	1059	0.0128725	0.892485	3	HUMAN	Q8NHP6	Motile sperm domain-containing protein 2	-1.97591	1.12047
12	4	-0.569	-0.1651	0.674084	-0.665366	0.252908	1062	0.0128381	0.891867	12	HUMAN	O96000	NADH dehydrogenase [ubiquinone] 1 beta subcomplex subunit 10	-1.98331	1.12124
3	2	-0.57	-0.1661	0.673617	-0.669427	0.251611	1064	0.0128152	0.891249	3	HUMAN	O95298	NADH dehydrogenase [ubiquinone] 1 subunit C2	-1.99073	1.12202
2	2	-0.57	-0.1661	0.673617	-0.669427	0.251611	1065	0.0128038	0.891249	2	HUMAN	Q53GS9	U4/U6.U5 tri-snRNP-associated protein 2	-1.99073	1.12202
5	5	-0.57	-0.1661	0.673617	-0.669427	0.251611	1066	0.0127923	0.891249	5	HUMAN	Q04721	Neurogenic locus notch homolog protein 2	-1.99073	1.12202
2	2	-0.571	-0.1671	0.67315	-0.673489	0.250318	1069	0.0127579	0.890631	2	HUMAN	Q96EL3	39S ribosomal protein L53, mitochondrial	-1.99817	1.1228
2	2	-0.572	-0.1681	0.672684	-0.677551	0.249028	1072	0.0127235	0.890014	2	HUMAN	Q9UKM7	Endoplasmic reticulum mannosyl-oligosaccharide 1,2-alpha-mannosidase	-2.00562	1.12358
5	3	-0.572	-0.1681	0.672684	-0.677551	0.249028	1073	0.0127121	0.890014	5	HUMAN	Q9Y5Z4	Heme-binding protein 2	-2.00562	1.12358
3	3	-0.572	-0.1681	0.672684	-0.677551	0.249028	1074	0.0127006	0.890014	3	HUMAN	Q9Y6D5	Brefeldin A-inhibited guanine nucleotide-exchange protein 2	-2.00562	1.12358
4	3	-0.572	-0.1681	0.672684	-0.677551	0.249028	1075	0.0126891	0.890014	4	HUMAN	P01137	Transforming growth factor beta-1	-2.00562	1.12358
10	4	-0.572	-0.1681	0.672684	-0.677551	0.249028	1076	0.0126777	0.890014	10	HUMAN	Q13751	Laminin subunit beta-3	-2.00562	1.12358
10	7	-0.572	-0.1681	0.672684	-0.677551	0.249028	1077	0.0126662	0.890014	10	HUMAN	P82933	28S ribosomal protein S9, mitochondrial	-2.00562	1.12358
3	2	-0.573	-0.1691	0.672217	-0.681613	0.247742	1082	0.0126089	0.889397	3	HUMAN	Q13630	GDP-L-fucose synthase	-2.01309	1.12436
6	4	-0.573	-0.1691	0.672217	-0.681613	0.247742	1083	0.0125974	0.889397	6	HUMAN	Q8IYB8	ATP-dependent RNA helicase SUPV3L1, mitochondrial	-2.01309	1.12436
4	3	-0.574	-0.1701	0.671752	-0.685674	0.246459	1086	0.012563	0.888781	4	HUMAN	P48444	Coatomer subunit delta	-2.02058	1.12514
6	4	-0.574	-0.1701	0.671752	-0.685674	0.246459	1087	0.0125516	0.888781	6	HUMAN	P62851	40S ribosomal protein S25	-2.02058	1.12514
7	5	-0.574	-0.1701	0.671752	-0.685674	0.246459	1088	0.0125401	0.888781	7	HUMAN	Q13596	Sorting nexin-1	-2.02058	1.12514
7	6	-0.574	-0.1701	0.671752	-0.685674	0.246459	1089	0.0125287	0.888781	7	HUMAN	P63104	14-3-3 protein zeta/delta	-2.02058	1.12514
3	2	-0.575	-0.1711	0.671286	-0.689736	0.24518	1093	0.0124828	0.888165	3	HUMAN	P62244	40S ribosomal protein S15a	-2.02809	1.12592
6	3	-0.575	-0.1711	0.671286	-0.689736	0.24518	1094	0.0124713	0.888165	6	HUMAN	Q15031	Probable leucine--tRNA ligase, mitochondrial	-2.02809	1.12592
6	5	-0.575	-0.1711	0.671286	-0.689736	0.24518	1095	0.0124599	0.888165	6	HUMAN	Q12959|Q15700	Disks large homolog 1	-2.02809	1.12592
3	2	-0.576	-0.1721	0.670821	-0.693798	0.243905	1099	0.012414	0.88755	3	HUMAN	Q32NB8	CDP-diacylglycerol--glycerol-3-phosphate 3-phosphatidyltransferase, mitochondrial	-2.03561	1.1267
6	4	-0.576	-0.1721	0.670821	-0.693798	0.243905	1100	0.0124026	0.88755	6	HUMAN	Q9Y3B7	39S ribosomal protein L11, mitochondrial	-2.03561	1.1267
7	3	-0.577	-0.1731	0.670356	-0.697859	0.242633	1106	0.0123338	0.886935	7	HUMAN	Q9BTW9	Tubulin-specific chaperone D	-2.04316	1.12748
9	3	-0.577	-0.1731	0.670356	-0.697859	0.242633	1107	0.0123223	0.886935	9	HUMAN	O75390	Citrate synthase, mitochondrial	-2.04316	1.12748
2	2	-0.578	-0.1741	0.669892	-0.701921	0.241364	1109	0.0122994	0.88632	2	HUMAN	Q9BQ61	Uncharacterized protein C19orf43	-2.05072	1.12826
3	3	-0.578	-0.1741	0.669892	-0.701921	0.241364	1110	0.0122879	0.88632	3	HUMAN	Q9P035	3-hydroxyacyl-CoA dehydratase 3	-2.05072	1.12826
4	3	-0.578	-0.1741	0.669892	-0.701921	0.241364	1111	0.0122765	0.88632	4	HUMAN	Q9HAB8	Phosphopantothenate--cysteine ligase	-2.05072	1.12826
9	4	-0.578	-0.1741	0.669892	-0.701921	0.241364	1112	0.012265	0.88632	9	HUMAN	P00568|Q9Y6K8	Adenylate kinase isoenzyme 1	-2.05072	1.12826
10	3	-0.579	-0.1751	0.669428	-0.705983	0.240099	1115	0.0122306	0.885706	10	HUMAN	P61916	Epididymal secretory protein E1	-2.0583	1.12904
16	9	-0.579	-0.1751	0.669428	-0.705983	0.240099	1116	0.0122192	0.885706	16	HUMAN	P36776	Lon protease homolog, mitochondrial	-2.0583	1.12904
5	3	-0.58	-0.1761	0.668964	-0.710045	0.238838	1125	0.012116	0.885092	5	HUMAN	Q13488	V-type proton ATPase 116 kDa subunit a isoform 3	-2.06589	1.12983
8	4	-0.58	-0.1761	0.668964	-0.710045	0.238838	1126	0.0121045	0.885092	8	HUMAN	Q9Y697	Cysteine desulfurase, mitochondrial	-2.06589	1.12983
11	7	-0.58	-0.1761	0.668964	-0.710045	0.238838	1127	0.0120931	0.885092	11	HUMAN	P37837	Transaldolase	-2.06589	1.12983
15	9	-0.582	-0.1781	0.668037	-0.718168	0.236327	1133	0.0120243	0.883866	15	HUMAN	O60313	Dynamin-like 120 kDa protein, mitochondrial	-2.08114	1.13139
14	9	-0.584	-0.1801	0.667112	-0.726292	0.23383	1140	0.0119441	0.882642	14	HUMAN	Q5JRA6	Melanoma inhibitory activity protein 3	-2.09647	1.13296
2	2	-0.585	-0.1811	0.666649	-0.730353	0.232587	1145	0.0118867	0.88203	2	HUMAN	P22059	Oxysterol-binding protein 1	-2.10416	1.13375
2	2	-0.585	-0.1811	0.666649	-0.730353	0.232587	1146	0.0118753	0.88203	2	HUMAN	Q15437	Protein transport protein Sec23B	-2.10416	1.13375
7	4	-0.585	-0.1811	0.666649	-0.730353	0.232587	1147	0.0118638	0.88203	7	HUMAN	Q969X5	Endoplasmic reticulum-Golgi intermediate compartment protein 1	-2.10416	1.13375
8	6	-0.585	-0.1811	0.666649	-0.730353	0.232587	1148	0.0118524	0.88203	8	HUMAN	Q9NVH1	DnaJ homolog subfamily C member 11	-2.10416	1.13375
4	4	-0.586	-0.1821	0.666187	-0.734415	0.231348	1153	0.011795	0.881419	4	HUMAN	Q9HD20	Probable cation-transporting ATPase 13A1	-2.11186	1.13453
7	3	-0.587	-0.1831	0.665726	-0.738477	0.230112	1156	0.0117607	0.880808	7	HUMAN	Q9H1K1	Iron-sulfur cluster assembly enzyme ISCU, mitochondrial	-2.11959	1.13532
3	3	-0.587	-0.1831	0.665726	-0.738477	0.230112	1157	0.0117492	0.880808	3	HUMAN	Q969Y2	tRNA modification GTPase GTPBP3, mitochondrial	-2.11959	1.13532
11	7	-0.588	-0.1841	0.665265	-0.742539	0.228881	1159	0.0117263	0.880198	11	HUMAN	P48637	Glutathione synthetase	-2.12733	1.13611
2	2	-0.589	-0.1851	0.664804	-0.7466	0.227652	1162	0.0116919	0.879588	2	HUMAN	Q96MW1	Coiled-coil domain-containing protein 43	-2.1351	1.1369
39	9	-0.589	-0.1851	0.664804	-0.7466	0.227652	1163	0.0116804	0.879588	39	HUMAN	P07339	Cathepsin D	-2.1351	1.1369
3	3	-0.59	-0.1861	0.664343	-0.750662	0.226428	1165	0.0116575	0.878979	3	HUMAN	P54920	Alpha-soluble NSF attachment protein	-2.14288	1.13768
5	4	-0.59	-0.1861	0.664343	-0.750662	0.226428	1166	0.011646	0.878979	5	HUMAN	Q9H7Z7	Prostaglandin E synthase 2	-2.14288	1.13768
20	8	-0.59	-0.1861	0.664343	-0.750662	0.226428	1167	0.0116346	0.878979	20	HUMAN	P22626	Heterogeneous nuclear ribonucleoproteins A2/B1	-2.14288	1.13768
9	5	-0.591	-0.1871	0.663883	-0.754724	0.225207	1168	0.0116231	0.87837	9	HUMAN	O15173	Membrane-associated progesterone receptor component 2	-2.15067	1.13847
3	2	-0.592	-0.1881	0.663423	-0.758786	0.22399	1169	0.0116116	0.877761	3	HUMAN	Q8IWA5	Choline transporter-like protein 2	-2.15849	1.13926
5	4	-0.592	-0.1881	0.663423	-0.758786	0.22399	1170	0.0116002	0.877761	5	HUMAN	Q9BRX8	Redox-regulatory protein FAM213A	-2.15849	1.13926
2	2	-0.593	-0.1891	0.662963	-0.762847	0.222777	1176	0.0115314	0.877153	2	HUMAN	O76071	Probable cytosolic iron-sulfur protein assembly protein CIAO1	-2.16633	1.14005
2	2	-0.594	-0.1901	0.662504	-0.766909	0.221568	1179	0.011497	0.876545	2	HUMAN	P41091|Q2VIR3	Eukaryotic translation initiation factor 2 subunit 3	-2.17418	1.14084
8	5	-0.594	-0.1901	0.662504	-0.766909	0.221568	1180	0.0114856	0.876545	8	HUMAN	Q08379	Golgin subfamily A member 2	-2.17418	1.14084
2	2	-0.595	-0.1911	0.662044	-0.770971	0.220362	1182	0.0114626	0.875938	2	HUMAN	P51398	28S ribosomal protein S29, mitochondrial	-2.18205	1.14163
5	4	-0.596	-0.1921	0.661586	-0.775032	0.21916	1185	0.0114282	0.875331	5	HUMAN	P49419	Alpha-aminoadipic semialdehyde dehydrogenase	-2.18994	1.14243
40	19	-0.596	-0.1921	0.661586	-0.775032	0.21916	1186	0.0114168	0.875331	40	HUMAN	P35580	Myosin-10	-2.18994	1.14243
4	3	-0.597	-0.1931	0.661127	-0.779094	0.217962	1189	0.0113824	0.874724	4	HUMAN	Q9Y224	UPF0568 protein C14orf166	-2.19785	1.14322
15	5	-0.597	-0.1931	0.661127	-0.779094	0.217962	1190	0.0113709	0.874724	15	HUMAN	Q99497	Protein DJ-1	-2.19785	1.14322
13	5	-0.597	-0.1931	0.661127	-0.779094	0.217962	1191	0.0113595	0.874724	13	HUMAN	Q15019	Septin-2	-2.19785	1.14322
2	2	-0.598	-0.1941	0.660669	-0.783156	0.216768	1193	0.0113365	0.874118	3	HUMAN	Q9H814|O00459	Phosphorylated adapter RNA export protein	-2.20578	1.14401
11	3	-0.598	-0.1941	0.660669	-0.783156	0.216768	1194	0.0113251	0.874118	11	HUMAN	P31040	Succinate dehydrogenase [ubiquinone] flavoprotein subunit, mitochondrial	-2.20578	1.14401
5	3	-0.598	-0.1941	0.660669	-0.783156	0.216768	1195	0.0113136	0.874118	5	HUMAN	Q12765	Secernin-1	-2.20578	1.14401
9	5	-0.598	-0.1941	0.660669	-0.783156	0.216768	1196	0.0113022	0.874118	9	HUMAN	Q06481	Amyloid-like protein 2	-2.20578	1.14401
9	2	-0.599	-0.1951	0.660211	-0.787218	0.215577	1199	0.0112678	0.873512	9	HUMAN	P51571	Translocon-associated protein subunit delta	-2.21372	1.1448
8	3	-0.599	-0.1951	0.660211	-0.787218	0.215577	1200	0.0112563	0.873512	8	HUMAN	P51148	Ras-related protein Rab-5C	-2.21372	1.1448
2	2	-0.6	-0.1961	0.659754	-0.791279	0.21439	1202	0.0112334	0.872907	2	HUMAN	P20839	Inosine-5'-monophosphate dehydrogenase 1	-2.22169	1.1456
7	2	-0.601	-0.1971	0.659297	-0.795341	0.213208	1206	0.0111875	0.872302	7	HUMAN	Q8IV08	Phospholipase D3	-2.22967	1.14639
7	2	-0.602	-0.1981	0.65884	-0.799403	0.212028	1207	0.0111761	0.871698	7	HUMAN	Q9NX00	Transmembrane protein 160	-2.23767	1.14719
2	2	-0.602	-0.1981	0.65884	-0.799403	0.212028	1208	0.0111646	0.871698	2	HUMAN	Q9H3Q1	Cdc42 effector protein 4	-2.23767	1.14719
3	3	-0.602	-0.1981	0.65884	-0.799403	0.212028	1209	0.0111531	0.871698	3	HUMAN	P53992	Protein transport protein Sec24C	-2.23767	1.14719
5	4	-0.602	-0.1981	0.65884	-0.799403	0.212028	1210	0.0111417	0.871698	5	HUMAN	O94851	Protein-methionine sulfoxide oxidase MICAL2	-2.23767	1.14719
5	2	-0.603	-0.1991	0.658383	-0.803465	0.210853	1213	0.0111073	0.871094	5	HUMAN	P84103	Serine/arginine-rich splicing factor 3	-2.24569	1.14798
2	2	-0.603	-0.1991	0.658383	-0.803465	0.210853	1214	0.0110958	0.871094	2	HUMAN	Q5JSH3	WD repeat-containing protein 44	-2.24569	1.14798
3	3	-0.603	-0.1991	0.658383	-0.803465	0.210853	1215	0.0110844	0.871094	3	HUMAN	Q8N335	Glycerol-3-phosphate dehydrogenase 1-like protein	-2.24569	1.14798
6	5	-0.603	-0.1991	0.658383	-0.803465	0.210853	1216	0.0110729	0.871094	6	HUMAN	P82094	TATA element modulatory factor	-2.24569	1.14798
4	2	-0.604	-0.2001	0.657927	-0.807526	0.209682	1217	0.0110614	0.87049	4	HUMAN	P63220	40S ribosomal protein S21	-2.25373	1.14878
7	4	-0.605	-0.2011	0.657471	-0.811588	0.208514	1218	0.01105	0.869887	7	HUMAN	O43399	Tumor protein D54	-2.26178	1.14957
16	4	-0.606	-0.2021	0.657016	-0.81565	0.20735	1222	0.0110041	0.869284	16	HUMAN	P30041	Peroxiredoxin-6	-2.26986	1.15037
23	5	-0.606	-0.2021	0.657016	-0.81565	0.20735	1223	0.0109927	0.869284	23	HUMAN	Q14847	LIM and SH3 domain protein 1	-2.26986	1.15037
9	8	-0.606	-0.2021	0.657016	-0.81565	0.20735	1224	0.0109812	0.869284	9	HUMAN	Q9UNF1	Melanoma-associated antigen D2	-2.26986	1.15037
5	3	-0.607	-0.2031	0.656561	-0.819712	0.20619	1225	0.0109697	0.868682	5	HUMAN	Q8N983	39S ribosomal protein L43, mitochondrial	-2.27795	1.15117
5	4	-0.607	-0.2031	0.656561	-0.819712	0.20619	1226	0.0109583	0.868682	5	HUMAN	Q14BN4	Sarcolemmal membrane-associated protein	-2.27795	1.15117
4	4	-0.607	-0.2031	0.656561	-0.819712	0.20619	1227	0.0109468	0.868682	4	HUMAN	Q8ND24	RING finger protein 214	-2.27795	1.15117
6	5	-0.607	-0.2031	0.656561	-0.819712	0.20619	1228	0.0109354	0.868682	6	HUMAN	P12109	Collagen alpha-1(VI) chain	-2.27795	1.15117
5	3	-0.608	-0.2041	0.656106	-0.823773	0.205034	1234	0.0108666	0.86808	5	HUMAN	Q9H9J2	39S ribosomal protein L44, mitochondrial	-2.28606	1.15197
12	7	-0.608	-0.2041	0.656106	-0.823773	0.205034	1235	0.0108551	0.86808	12	HUMAN	O00754	Lysosomal alpha-mannosidase	-2.28606	1.15197
2	2	-0.609	-0.2051	0.655651	-0.827835	0.203882	1238	0.0108207	0.867479	2	HUMAN	O14734	Acyl-coenzyme A thioesterase 8	-2.29419	1.15277
4	4	-0.609	-0.2051	0.655651	-0.827835	0.203882	1239	0.0108093	0.867479	4	HUMAN	Q9P0V3	SH3 domain-binding protein 4	-2.29419	1.15277
3	3	-0.61	-0.2061	0.655197	-0.831897	0.202734	1247	0.0107176	0.866877	3	HUMAN	Q9UIJ7	GTP:AMP phosphotransferase, mitochondrial	-2.30234	1.15357
3	2	-0.611	-0.2071	0.654743	-0.835959	0.201589	1249	0.0106946	0.866277	3	HUMAN	Q9UJT2	Testis-specific serine kinase substrate	-2.31051	1.15437
2	2	-0.611	-0.2071	0.654743	-0.835959	0.201589	1250	0.0106832	0.866277	2	HUMAN	P20591	Interferon-induced GTP-binding protein Mx1	-2.31051	1.15437
7	3	-0.611	-0.2071	0.654743	-0.835959	0.201589	1251	0.0106717	0.866277	7	HUMAN	O43402	Neighbor of COX4	-2.31051	1.15437
6	3	-0.611	-0.2071	0.654743	-0.835959	0.201589	1252	0.0106602	0.866277	6	HUMAN	P61221	ATP-binding cassette sub-family E member 1	-2.31051	1.15437
13	6	-0.611	-0.2071	0.654743	-0.835959	0.201589	1253	0.0106488	0.866277	13	HUMAN	Q9NY33	Dipeptidyl peptidase 3	-2.31051	1.15437
2	2	-0.612	-0.2081	0.654289	-0.84002	0.200448	1256	0.0106144	0.865677	2	HUMAN	A6NDG6	Phosphoglycolate phosphatase	-2.3187	1.15517
3	2	-0.613	-0.2091	0.653836	-0.844082	0.199312	1262	0.0105456	0.865077	3	HUMAN	Q9BQP7	Uncharacterized protein C20orf72	-2.3269	1.15597
7	3	-0.613	-0.2091	0.653836	-0.844082	0.199312	1263	0.0105342	0.865077	7	HUMAN	P52815	39S ribosomal protein L12, mitochondrial	-2.3269	1.15597
4	2	-0.614	-0.2101	0.653383	-0.848144	0.198179	1267	0.0104883	0.864477	4	HUMAN	Q9Y394	Dehydrogenase/reductase SDR family member 7	-2.33512	1.15677
10	5	-0.615	-0.2111	0.65293	-0.852206	0.19705	1269	0.0104654	0.863878	10	HUMAN	O95299	NADH dehydrogenase [ubiquinone] 1 alpha subcomplex subunit 10, mitochondrial	-2.34337	1.15757
6	5	-0.616	-0.2121	0.652477	-0.856267	0.195925	1273	0.0104195	0.86328	6	HUMAN	Q9UHB6	LIM domain and actin-binding protein 1	-2.35163	1.15837
14	8	-0.616	-0.2121	0.652477	-0.856267	0.195925	1274	0.0104081	0.86328	14	HUMAN	Q969V3	Nicalin	-2.35163	1.15837
2	2	-0.617	-0.2131	0.652025	-0.860329	0.194804	1277	0.0103737	0.862682	2	HUMAN	Q9H6U8	Alpha-1,2-mannosyltransferase ALG9	-2.35991	1.15918
5	3	-0.617	-0.2131	0.652025	-0.860329	0.194804	1278	0.0103622	0.862682	5	HUMAN	Q14197	Peptidyl-tRNA hydrolase ICT1, mitochondrial	-2.35991	1.15918
10	5	-0.617	-0.2131	0.652025	-0.860329	0.194804	1279	0.0103508	0.862682	10	HUMAN	Q95604	HLA class I histocompatibility antigen, Cw-17 alpha chain	-2.35991	1.15918
11	8	-0.617	-0.2131	0.652025	-0.860329	0.194804	1280	0.0103393	0.862682	11	HUMAN	P02533|P08779	Keratin, type I cytoskeletal 14	-2.35991	1.15918
6	2	-0.619	-0.2151	0.651122	-0.868452	0.192573	1287	0.0102591	0.861486	6	HUMAN	Q96M27	Protein PRRC1	-2.37652	1.16078
14	11	-0.619	-0.2151	0.651122	-0.868452	0.192573	1288	0.0102476	0.861486	14	HUMAN	P27816	Microtubule-associated protein 4	-2.37652	1.16078
7	3	-0.62	-0.2161	0.650671	-0.872514	0.191464	1290	0.0102247	0.86089	7	HUMAN	Q9NQ29	Putative RNA-binding protein Luc7-like 1	-2.38486	1.16159
5	4	-0.62	-0.2161	0.650671	-0.872514	0.191464	1291	0.0102132	0.86089	5	HUMAN	O76003	Glutaredoxin-3	-2.38486	1.16159
13	2	-0.621	-0.2171	0.65022	-0.876576	0.190359	1294	0.0101788	0.860293	13	HUMAN	O96005	Cleft lip and palate transmembrane protein 1	-2.39321	1.16239
2	2	-0.621	-0.2171	0.65022	-0.876576	0.190359	1295	0.0101674	0.860293	2	HUMAN	Q99426	Tubulin-folding cofactor B	-2.39321	1.16239
4	2	-0.622	-0.2181	0.64977	-0.880638	0.189257	1298	0.010133	0.859697	4	HUMAN	Q9H3K2	Growth hormone-inducible transmembrane protein	-2.40158	1.1632
2	2	-0.622	-0.2181	0.64977	-0.880638	0.189257	1299	0.0101215	0.859697	2	HUMAN	Q92817	Envoplakin	-2.40158	1.1632
9	3	-0.622	-0.2181	0.64977	-0.880638	0.189257	1300	0.01011	0.859697	9	HUMAN	P15586	N-acetylglucosamine-6-sulfatase	-2.40158	1.1632
6	3	-0.622	-0.2181	0.64977	-0.880638	0.189257	1301	0.0100986	0.859697	6	HUMAN	Q9H8Y8	Golgi reassembly-stacking protein 2	-2.40158	1.1632
5	5	-0.622	-0.2181	0.64977	-0.880638	0.189257	1302	0.0100871	0.859697	5	HUMAN	Q9UBF2	Coatomer subunit gamma-2	-2.40158	1.1632
17	10	-0.622	-0.2181	0.64977	-0.880638	0.189257	1303	0.0100757	0.859697	17	HUMAN	P43304	Glycerol-3-phosphate dehydrogenase, mitochondrial	-2.40158	1.1632
18	6	-0.624	-0.2201	0.648869	-0.888761	0.187066	1310	0.00999541	0.858506	18	HUMAN	Q16181	Septin-7	-2.41838	1.16481
3	2	-0.625	-0.2211	0.64842	-0.892823	0.185976	1313	0.00996103	0.857911	3	HUMAN	Q7LGA3	Heparan sulfate 2-O-sulfotransferase 1	-2.42681	1.16562
3	3	-0.625	-0.2211	0.64842	-0.892823	0.185976	1314	0.00994956	0.857911	3	HUMAN	Q96PU5	E3 ubiquitin-protein ligase NEDD4-like	-2.42681	1.16562
10	7	-0.625	-0.2211	0.64842	-0.892823	0.185976	1315	0.0099381	0.857911	10	HUMAN	Q93008|O00507	Probable ubiquitin carboxyl-terminal hydrolase FAF-X	-2.42681	1.16562
3	2	-0.626	-0.2221	0.64797	-0.896885	0.18489	1317	0.00991518	0.857317	3	HUMAN	Q9UKU7	Isobutyryl-CoA dehydrogenase, mitochondrial	-2.43526	1.16643
2	2	-0.626	-0.2221	0.64797	-0.896885	0.18489	1318	0.00990371	0.857317	2	HUMAN	Q9UQ90	Paraplegin	-2.43526	1.16643
6	3	-0.626	-0.2221	0.64797	-0.896885	0.18489	1319	0.00989225	0.857317	6	HUMAN	Q14258	E3 ubiquitin/ISG15 ligase TRIM25	-2.43526	1.16643
5	4	-0.626	-0.2221	0.64797	-0.896885	0.18489	1320	0.00988079	0.857317	5	HUMAN	Q96J84	Kin of IRRE-like protein 1	-2.43526	1.16643
16	8	-0.626	-0.2221	0.64797	-0.896885	0.18489	1321	0.00986933	0.857317	16	HUMAN	Q9H845	Acyl-CoA dehydrogenase family member 9, mitochondrial	-2.43526	1.16643
2	2	-0.627	-0.2231	0.647521	-0.900946	0.183808	1323	0.0098464	0.856723	2	HUMAN	P0C0S8	Histone H2A type 1	-2.44373	1.16724
3	3	-0.627	-0.2231	0.647521	-0.900946	0.183808	1324	0.00983494	0.856723	3	HUMAN	Q5ST30	Valine--tRNA ligase, mitochondrial	-2.44373	1.16724
76	29	-0.627	-0.2231	0.647521	-0.900946	0.183808	1325	0.00982348	0.856723	76	HUMAN	O75369	Filamin-B	-2.44373	1.16724
4	4	-0.628	-0.2241	0.647073	-0.905008	0.182731	1329	0.00977762	0.856129	4	HUMAN	Q9UJU6	Drebrin-like protein	-2.45221	1.16805
5	2	-0.629	-0.2251	0.646624	-0.90907	0.181657	1331	0.0097547	0.855536	5	HUMAN	O75608	Acyl-protein thioesterase 1	-2.46071	1.16886
11	4	-0.629	-0.2251	0.646624	-0.90907	0.181657	1332	0.00974324	0.855536	11	HUMAN	P13073	Cytochrome c oxidase subunit 4 isoform 1, mitochondrial	-2.46071	1.16886
3	2	-0.63	-0.2261	0.646176	-0.913132	0.180587	1335	0.00970885	0.854943	3	HUMAN	Q96E11	Ribosome-recycling factor, mitochondrial	-2.46924	1.16967
8	4	-0.63	-0.2261	0.646176	-0.913132	0.180587	1336	0.00969739	0.854943	8	HUMAN	Q9HC38	Glyoxalase domain-containing protein 4	-2.46924	1.16967
9	6	-0.63	-0.2261	0.646176	-0.913132	0.180587	1337	0.00968592	0.854943	9	HUMAN	O94826	Mitochondrial import receptor subunit TOM70	-2.46924	1.16967
29	17	-0.63	-0.2261	0.646176	-0.913132	0.180587	1338	0.00967446	0.854943	29	HUMAN	Q7KZF4	Staphylococcal nuclease domain-containing protein 1	-2.46924	1.16967
3	3	-0.631	-0.2271	0.645729	-0.917193	0.179521	1340	0.00965154	0.854351	3	HUMAN	Q9H5Q4	Dimethyladenosine transferase 2, mitochondrial	-2.47778	1.17048
2	2	-0.633	-0.2291	0.644834	-0.925317	0.177401	1345	0.00959422	0.853167	2	HUMAN	Q04206	Transcription factor p65	-2.49492	1.1721
2	2	-0.634	-0.2301	0.644387	-0.929379	0.176346	1346	0.00958276	0.852576	2	HUMAN	Q9NWU5	39S ribosomal protein L22, mitochondrial	-2.50352	1.17292
2	2	-0.634	-0.2301	0.644387	-0.929379	0.176346	1347	0.0095713	0.852576	2	HUMAN	Q9H074	Polyadenylate-binding protein-interacting protein 1	-2.50352	1.17292
5	3	-0.635	-0.2311	0.643941	-0.93344	0.175296	1349	0.00954837	0.851985	5	HUMAN	P49321	Nuclear autoantigenic sperm protein	-2.51213	1.17373
2	2	-0.636	-0.2321	0.643495	-0.937502	0.17425	1352	0.00951398	0.851395	2	HUMAN	Q9NRS6	Sorting nexin-15	-2.52077	1.17454
4	4	-0.637	-0.2331	0.643049	-0.941564	0.173208	1357	0.00945667	0.850805	4	HUMAN	Q16798	NADP-dependent malic enzyme, mitochondrial	-2.52942	1.17536
15	6	-0.637	-0.2331	0.643049	-0.941564	0.173208	1358	0.00944521	0.850805	15	HUMAN	P31930	Cytochrome b-c1 complex subunit 1, mitochondrial	-2.52942	1.17536
5	2	-0.638	-0.2341	0.642603	-0.945626	0.17217	1360	0.00942228	0.850215	5	HUMAN	Q9UNZ5	Leydig cell tumor 10 kDa protein homolog	-2.5381	1.17617
6	3	-0.638	-0.2341	0.642603	-0.945626	0.17217	1361	0.00941082	0.850215	6	HUMAN	P60866	40S ribosomal protein S20	-2.5381	1.17617
3	3	-0.638	-0.2341	0.642603	-0.945626	0.17217	1362	0.00939936	0.850215	3	HUMAN	Q6ZXV5	Transmembrane and TPR repeat-containing protein 3	-2.5381	1.17617
15	5	-0.638	-0.2341	0.642603	-0.945626	0.17217	1363	0.0093879	0.850215	15	HUMAN	P00505	Aspartate aminotransferase, mitochondrial	-2.5381	1.17617
2	2	-0.64	-0.2361	0.641713	-0.953749	0.170105	1365	0.00936497	0.849037	2	HUMAN	P78357	Contactin-associated protein 1	-2.5555	1.1778
8	3	-0.64	-0.2361	0.641713	-0.953749	0.170105	1366	0.00935351	0.849037	8	HUMAN	P60174	Triosephosphate isomerase	-2.5555	1.1778
5	3	-0.64	-0.2361	0.641713	-0.953749	0.170105	1367	0.00934204	0.849037	5	HUMAN	Q9UBS4	DnaJ homolog subfamily B member 11	-2.5555	1.1778
5	3	-0.64	-0.2361	0.641713	-0.953749	0.170105	1368	0.00933058	0.849037	5	HUMAN	Q13405	39S ribosomal protein L49, mitochondrial	-2.5555	1.1778
13	6	-0.64	-0.2361	0.641713	-0.953749	0.170105	1369	0.00931912	0.849037	13	HUMAN	P55786|A6NEC2	Puromycin-sensitive aminopeptidase	-2.5555	1.1778
2	2	-0.641	-0.2371	0.641268	-0.957811	0.169079	1374	0.00926181	0.848449	2	HUMAN	Q9UH99	SUN domain-containing protein 2	-2.56423	1.17862
3	2	-0.641	-0.2371	0.641268	-0.957811	0.169079	1375	0.00925034	0.848449	3	HUMAN	Q01968	Inositol polyphosphate 5-phosphatase OCRL-1	-2.56423	1.17862
3	2	-0.641	-0.2371	0.641268	-0.957811	0.169079	1376	0.00923888	0.848449	3	HUMAN	Q9UBT2	SUMO-activating enzyme subunit 2	-2.56423	1.17862
2	2	-0.641	-0.2371	0.641268	-0.957811	0.169079	1377	0.00922742	0.848449	2	HUMAN	P46778	60S ribosomal protein L21	-2.56423	1.17862
5	3	-0.641	-0.2371	0.641268	-0.957811	0.169079	1378	0.00921596	0.848449	5	HUMAN	Q9Y512	Sorting and assembly machinery component 50 homolog	-2.56423	1.17862
16	8	-0.641	-0.2371	0.641268	-0.957811	0.169079	1379	0.00920449	0.848449	16	HUMAN	Q13724	Mannosyl-oligosaccharide glucosidase	-2.56423	1.17862
3	2	-0.642	-0.2381	0.640824	-0.961872	0.168057	1382	0.00917011	0.847861	3	HUMAN	Q9H2W6	39S ribosomal protein L46, mitochondrial	-2.57298	1.17944
22	10	-0.642	-0.2381	0.640824	-0.961872	0.168057	1383	0.00915864	0.847861	22	HUMAN	Q6NZI2	Polymerase I and transcript release factor	-2.57298	1.17944
4	2	-0.643	-0.2391	0.64038	-0.965934	0.167039	1384	0.00914718	0.847274	4	HUMAN	Q9BV81	Transmembrane protein 93	-2.58175	1.18026
3	2	-0.644	-0.2401	0.639936	-0.969996	0.166024	1389	0.00908987	0.846687	3	HUMAN	Q96TC7	Regulator of microtubule dynamics protein 3	-2.59053	1.18107
2	2	-0.644	-0.2401	0.639936	-0.969996	0.166024	1390	0.0090784	0.846687	2	HUMAN	P28799	Granulins	-2.59053	1.18107
34	14	-0.645	-0.2411	0.639493	-0.974058	0.165014	1394	0.00903255	0.8461	34	HUMAN	P05783	Keratin, type I cytoskeletal 18	-2.59934	1.18189
2	2	-0.646	-0.2421	0.63905	-0.978119	0.164008	1395	0.00902109	0.845514	2	HUMAN	P51812	Ribosomal protein S6 kinase alpha-3	-2.60817	1.18271
8	3	-0.646	-0.2421	0.63905	-0.978119	0.164008	1396	0.00900963	0.845514	8	HUMAN	P62072	Mitochondrial import inner membrane translocase subunit Tim10	-2.60817	1.18271
5	3	-0.647	-0.2431	0.638607	-0.982181	0.163005	1399	0.00897524	0.844928	5	HUMAN	Q9UHQ9	NADH-cytochrome b5 reductase 1	-2.61701	1.18353
2	2	-0.648	-0.2441	0.638164	-0.986243	0.162007	1401	0.00895232	0.844342	2	HUMAN	Q9H4A4	Aminopeptidase B	-2.62587	1.18435
6	4	-0.649	-0.2451	0.637722	-0.990305	0.161013	1404	0.00891793	0.843757	6	HUMAN	Q9HC35	Echinoderm microtubule-associated protein-like 4	-2.63475	1.18517
8	4	-0.649	-0.2451	0.637722	-0.990305	0.161013	1405	0.00890646	0.843757	8	HUMAN	O95571	Protein ETHE1, mitochondrial	-2.63475	1.18517
4	2	-0.65	-0.2461	0.63728	-0.994366	0.160022	1408	0.00887208	0.843173	4	HUMAN	Q8IYS2	Uncharacterized protein KIAA2013	-2.64366	1.186
3	2	-0.65	-0.2461	0.63728	-0.994366	0.160022	1409	0.00886061	0.843173	3	HUMAN	P62857	40S ribosomal protein S28	-2.64366	1.186
2	2	-0.651	-0.2471	0.636839	-0.998428	0.159036	1411	0.00883769	0.842588	2	HUMAN	P22570	NADPH:adrenodoxin oxidoreductase, mitochondrial	-2.65258	1.18682
4	3	-0.651	-0.2471	0.636839	-0.998428	0.159036	1412	0.00882623	0.842588	4	HUMAN	P20042	Eukaryotic translation initiation factor 2 subunit 2	-2.65258	1.18682
5	3	-0.651	-0.2471	0.636839	-0.998428	0.159036	1413	0.00881476	0.842588	5	HUMAN	Q96EY7	Pentatricopeptide repeat-containing protein 3, mitochondrial	-2.65258	1.18682
3	2	-0.652	-0.2481	0.636397	-1.00249	0.158054	1414	0.0088033	0.842005	3	HUMAN	O60925	Prefoldin subunit 1	-2.66151	1.18764
6	4	-0.652	-0.2481	0.636397	-1.00249	0.158054	1415	0.00879184	0.842005	6	HUMAN	Q15006	Tetratricopeptide repeat protein 35	-2.66151	1.18764
5	2	-0.653	-0.2491	0.635957	-1.00655	0.157075	1419	0.00874599	0.841421	5	HUMAN	P24386	Rab proteins geranylgeranyltransferase component A 1	-2.67047	1.18847
2	2	-0.653	-0.2491	0.635957	-1.00655	0.157075	1420	0.00873453	0.841421	2	HUMAN	Q01433	AMP deaminase 2	-2.67047	1.18847
6	4	-0.653	-0.2491	0.635957	-1.00655	0.157075	1421	0.00872306	0.841421	6	HUMAN	P32322	Pyrroline-5-carboxylate reductase 1, mitochondrial	-2.67047	1.18847
7	2	-0.654	-0.2501	0.635516	-1.01061	0.156101	1423	0.00870014	0.840838	7	HUMAN	P07205	Phosphoglycerate kinase 2	-2.67945	1.18929
3	2	-0.654	-0.2501	0.635516	-1.01061	0.156101	1424	0.00868867	0.840838	3	HUMAN	Q7Z2W4	Zinc finger CCCH-type antiviral protein 1	-2.67945	1.18929
8	5	-0.654	-0.2501	0.635516	-1.01061	0.156101	1425	0.00867721	0.840838	8	HUMAN	O00461	Golgi integral membrane protein 4	-2.67945	1.18929
2	2	-0.655	-0.2511	0.635075	-1.01468	0.15513	1426	0.00866575	0.840256	2	HUMAN	Q9C0E8	Protein lunapark	-2.68845	1.19011
3	2	-0.655	-0.2511	0.635075	-1.01468	0.15513	1427	0.00865429	0.840256	3	HUMAN	P49441	Inositol polyphosphate 1-phosphatase	-2.68845	1.19011
8	3	-0.655	-0.2511	0.635075	-1.01468	0.15513	1428	0.00864282	0.840256	8	HUMAN	Q06203	Amidophosphoribosyltransferase	-2.68845	1.19011
4	2	-0.656	-0.2521	0.634635	-1.01874	0.154164	1431	0.00860844	0.839673	4	HUMAN	P21283	V-type proton ATPase subunit C 1	-2.69746	1.19094
6	3	-0.656	-0.2521	0.634635	-1.01874	0.154164	1432	0.00859697	0.839673	6	HUMAN	Q13442	28 kDa heat- and acid-stable phosphoprotein	-2.69746	1.19094
3	2	-0.657	-0.2531	0.634196	-1.0228	0.153202	1436	0.00855112	0.839091	3	HUMAN	Q9P0P0	E3 ubiquitin-protein ligase RNF181	-2.7065	1.19177
7	3	-0.657	-0.2531	0.634196	-1.0228	0.153202	1437	0.00853966	0.839091	7	HUMAN	Q99714	3-hydroxyacyl-CoA dehydrogenase type-2	-2.7065	1.19177
2	2	-0.658	-0.2541	0.633756	-1.02686	0.152243	1439	0.00851674	0.83851	2	HUMAN	Q8IYI6	Exocyst complex component 8	-2.71555	1.19259
4	2	-0.659	-0.2551	0.633317	-1.03092	0.151289	1440	0.00850527	0.837929	4	HUMAN	P09758	Tumor-associated calcium signal transducer 2	-2.72462	1.19342
2	2	-0.659	-0.2551	0.633317	-1.03092	0.151289	1441	0.00849381	0.837929	2	HUMAN	P29597	Non-receptor tyrosine-protein kinase TYK2	-2.72462	1.19342
6	5	-0.659	-0.2551	0.633317	-1.03092	0.151289	1442	0.00848235	0.837929	6	HUMAN	P11413	Glucose-6-phosphate 1-dehydrogenase	-2.72462	1.19342
16	4	-0.66	-0.2561	0.632878	-1.03498	0.150338	1443	0.00847088	0.837348	16	HUMAN	P10319|P18465	HLA class I histocompatibility antigen, B-58 alpha chain	-2.73372	1.19425
7	6	-0.66	-0.2561	0.632878	-1.03498	0.150338	1444	0.00845942	0.837348	7	HUMAN	Q92878	DNA repair protein RAD50	-2.73372	1.19425
2	2	-0.661	-0.2571	0.63244	-1.03905	0.149392	1446	0.0084365	0.836768	2	HUMAN	P11234	Ras-related protein Ral-B	-2.74283	1.19507
4	2	-0.662	-0.2581	0.632002	-1.04311	0.148449	1448	0.00841357	0.836188	4	HUMAN	O60831	PRA1 family protein 2	-2.75196	1.1959
3	3	-0.663	-0.2591	0.631564	-1.04717	0.147511	1451	0.00837918	0.835609	3	HUMAN	Q641Q2|Q9Y4E1|Q5SNT6|Q5SRD0	WASH complex subunit FAM21A	-2.76111	1.19673
4	3	-0.663	-0.2591	0.631564	-1.04717	0.147511	1452	0.00836772	0.835609	4	HUMAN	Q15005	Signal peptidase complex subunit 2	-2.76111	1.19673
3	3	-0.663	-0.2591	0.631564	-1.04717	0.147511	1453	0.00835626	0.835609	3	HUMAN	P14735	Insulin-degrading enzyme	-2.76111	1.19673
14	7	-0.663	-0.2591	0.631564	-1.04717	0.147511	1454	0.0083448	0.835609	14	HUMAN	P29401	Transketolase	-2.76111	1.19673
15	8	-0.663	-0.2591	0.631564	-1.04717	0.147511	1455	0.00833333	0.835609	15	HUMAN	Q00059	Transcription factor A, mitochondrial	-2.76111	1.19673
3	2	-0.664	-0.2601	0.631126	-1.05123	0.146576	1456	0.00832187	0.83503	3	HUMAN	Q8NC42	E3 ubiquitin-protein ligase RNF149	-2.77028	1.19756
5	4	-0.665	-0.2611	0.630689	-1.05529	0.145646	1459	0.00828748	0.834451	5	HUMAN	Q02127	Dihydroorotate dehydrogenase (quinone), mitochondrial	-2.77946	1.19839
4	2	-0.666	-0.2621	0.630252	-1.05935	0.144719	1462	0.00825309	0.833873	4	HUMAN	O14828	Secretory carrier-associated membrane protein 3	-2.78867	1.19922
3	2	-0.666	-0.2621	0.630252	-1.05935	0.144719	1463	0.00824163	0.833873	3	HUMAN	Q6NXT6	Transmembrane anterior posterior transformation protein 1 homolog	-2.78867	1.19922
6	3	-0.666	-0.2621	0.630252	-1.05935	0.144719	1464	0.00823017	0.833873	6	HUMAN	Q9BU61	NADH dehydrogenase [ubiquinone] 1 alpha subcomplex assembly factor 3	-2.78867	1.19922
6	2	-0.667	-0.2631	0.629815	-1.06342	0.143797	1469	0.00817286	0.833295	6	HUMAN	Q96B49	Mitochondrial import receptor subunit TOM6 homolog	-2.7979	1.20005
2	2	-0.667	-0.2631	0.629815	-1.06342	0.143797	1470	0.00816139	0.833295	2	HUMAN	Q16394	Exostosin-1	-2.7979	1.20005
2	2	-0.669	-0.2651	0.628942	-1.07154	0.141963	1471	0.00814993	0.832141	2	HUMAN	O75828	Carbonyl reductase [NADPH] 3	-2.81641	1.20172
3	2	-0.669	-0.2651	0.628942	-1.07154	0.141963	1472	0.00813847	0.832141	3	HUMAN	P52292	Importin subunit alpha-2	-2.81641	1.20172
3	2	-0.669	-0.2651	0.628942	-1.07154	0.141963	1473	0.00812701	0.832141	3	HUMAN	Q92542	Nicastrin	-2.81641	1.20172
3	2	-0.669	-0.2651	0.628942	-1.07154	0.141963	1474	0.00811554	0.832141	3	HUMAN	Q9Y5X3	Sorting nexin-5	-2.81641	1.20172
10	4	-0.669	-0.2651	0.628942	-1.07154	0.141963	1475	0.00810408	0.832141	10	HUMAN	P51858	Hepatoma-derived growth factor	-2.81641	1.20172
4	2	-0.67	-0.2661	0.628507	-1.0756	0.141053	1476	0.00809262	0.831564	4	HUMAN	Q14257	Reticulocalbin-2	-2.82569	1.20255
2	2	-0.67	-0.2661	0.628507	-1.0756	0.141053	1477	0.00808116	0.831564	2	HUMAN	Q9P0M9	39S ribosomal protein L27, mitochondrial	-2.82569	1.20255
40	21	-0.67	-0.2661	0.628507	-1.0756	0.141053	1478	0.00806969	0.831564	40	HUMAN	Q16891	Mitochondrial inner membrane protein	-2.82569	1.20255
2	2	-0.671	-0.2671	0.628071	-1.07966	0.140146	1481	0.0080353	0.830988	2	HUMAN	Q9HA64	Ketosamine-3-kinase	-2.835	1.20339
5	2	-0.672	-0.2681	0.627636	-1.08372	0.139243	1484	0.00800092	0.830412	5	HUMAN	Q13177	Serine/threonine-protein kinase PAK 2	-2.84432	1.20422
3	2	-0.673	-0.2691	0.627201	-1.08779	0.138345	1487	0.00796653	0.829837	3	HUMAN	Q6P1N0	Coiled-coil and C2 domain-containing protein 1A	-2.85366	1.20506
4	2	-0.674	-0.2701	0.626767	-1.09185	0.13745	1493	0.00789775	0.829262	4	HUMAN	Q99470	Stromal cell-derived factor 2	-2.86302	1.20589
12	4	-0.676	-0.2721	0.625898	-1.09997	0.135672	1499	0.00782898	0.828113	12	HUMAN	P08582	Melanotransferrin	-2.8818	1.20756
10	6	-0.677	-0.2731	0.625465	-1.10403	0.134789	1501	0.00780605	0.827539	10	HUMAN	P54886	Delta-1-pyrroline-5-carboxylate synthase	-2.89122	1.2084
5	2	-0.678	-0.2741	0.625031	-1.1081	0.13391	1503	0.00778313	0.826966	5	HUMAN	O75312	Zinc finger protein ZPR1	-2.90066	1.20924
4	4	-0.678	-0.2741	0.625031	-1.1081	0.13391	1504	0.00777166	0.826966	4	HUMAN	Q96CV9	Optineurin	-2.90066	1.20924
2	2	-0.679	-0.2751	0.624598	-1.11216	0.133035	1505	0.0077602	0.826393	2	HUMAN	Q96P20	NACHT, LRR and PYD domains-containing protein 3	-2.91012	1.21008
3	3	-0.679	-0.2751	0.624598	-1.11216	0.133035	1506	0.00774874	0.826393	3	HUMAN	O43719	HIV Tat-specific factor 1	-2.91012	1.21008
6	3	-0.68	-0.2761	0.624165	-1.11622	0.132164	1511	0.00769143	0.82582	6	HUMAN	Q86TM6	E3 ubiquitin-protein ligase synoviolin	-2.9196	1.21092
7	2	-0.681	-0.2771	0.623733	-1.12028	0.131297	1512	0.00767996	0.825248	7	HUMAN	Q9Y2S7	Polymerase delta-interacting protein 2	-2.92909	1.21176
5	3	-0.682	-0.2781	0.623301	-1.12434	0.130434	1514	0.00765704	0.824676	5	HUMAN	O15212	Prefoldin subunit 6	-2.93861	1.2126
3	3	-0.683	-0.2791	0.622869	-1.1284	0.129575	1516	0.00763411	0.824105	3	HUMAN	O95810	Serum deprivation-response protein	-2.94814	1.21344
2	2	-0.685	-0.2811	0.622006	-1.13653	0.127868	1521	0.0075768	0.822963	2	HUMAN	Q9BW92	Threonine--tRNA ligase, mitochondrial	-2.96727	1.21512
7	4	-0.685	-0.2811	0.622006	-1.13653	0.127868	1522	0.00756534	0.822963	7	HUMAN	P28482	Mitogen-activated protein kinase 1	-2.96727	1.21512
27	10	-0.685	-0.2811	0.622006	-1.13653	0.127868	1523	0.00755387	0.822963	27	HUMAN	Q70UQ0	Inhibitor of nuclear factor kappa-B kinase-interacting protein	-2.96727	1.21512
4	2	-0.688	-0.2841	0.620714	-1.14871	0.125337	1527	0.00750802	0.821254	4	HUMAN	P68400	Casein kinase II subunit alpha	-2.99611	1.21765
11	6	-0.688	-0.2841	0.620714	-1.14871	0.125337	1528	0.00749656	0.821254	11	HUMAN	P28838	Cytosol aminopeptidase	-2.99611	1.21765
4	2	-0.689	-0.2851	0.620284	-1.15277	0.124502	1532	0.00745071	0.820685	4	HUMAN	Q16698	2,4-dienoyl-CoA reductase, mitochondrial	-3.00576	1.21849
6	2	-0.69	-0.2861	0.619854	-1.15684	0.12367	1535	0.00741632	0.820116	6	HUMAN	Q71UM5	40S ribosomal protein S27-like	-3.01544	1.21934
6	4	-0.69	-0.2861	0.619854	-1.15684	0.12367	1536	0.00740486	0.820116	6	HUMAN	Q13217	DnaJ homolog subfamily C member 3	-3.01544	1.21934
14	9	-0.69	-0.2861	0.619854	-1.15684	0.12367	1537	0.0073934	0.820116	14	HUMAN	Q00341	Vigilin	-3.01544	1.21934
5	5	-0.691	-0.2871	0.619424	-1.1609	0.122842	1538	0.00738193	0.819548	5	HUMAN	Q12849	G-rich sequence factor 1	-3.02513	1.22019
2	2	-0.692	-0.2881	0.618995	-1.16496	0.122018	1543	0.00732462	0.81898	2	HUMAN	Q9BRK3	Matrix-remodeling-associated protein 8	-3.03484	1.22103
5	4	-0.692	-0.2881	0.618995	-1.16496	0.122018	1544	0.00731316	0.81898	5	HUMAN	Q96RQ3	Methylcrotonoyl-CoA carboxylase subunit alpha, mitochondrial	-3.03484	1.22103
11	6	-0.692	-0.2881	0.618995	-1.16496	0.122018	1545	0.0073017	0.81898	11	HUMAN	O14879	Interferon-induced protein with tetratricopeptide repeats 3	-3.03484	1.22103
21	11	-0.695	-0.2911	0.617709	-1.17714	0.119569	1554	0.00719853	0.817279	21	HUMAN	O95202	LETM1 and EF-hand domain-containing protein 1, mitochondrial	-3.06409	1.22357
3	2	-0.696	-0.2921	0.617281	-1.18121	0.11876	1557	0.00716414	0.816712	3	HUMAN	Q9BVT8	Transmembrane and ubiquitin-like domain-containing protein 1	-3.07387	1.22442
23	4	-0.696	-0.2921	0.617281	-1.18121	0.11876	1558	0.00715268	0.816712	23	HUMAN	O75396	Vesicle-trafficking protein SEC22b	-3.07387	1.22442
6	3	-0.697	-0.2931	0.616854	-1.18527	0.117956	1559	0.00714122	0.816146	6	HUMAN	P04179	Superoxide dismutase [Mn], mitochondrial	-3.08368	1.22527
8	3	-0.697	-0.2931	0.616854	-1.18527	0.117956	1560	0.00712976	0.816146	8	HUMAN	O75746	Calcium-binding mitochondrial carrier protein Aralar1	-3.08368	1.22527
4	4	-0.697	-0.2931	0.616854	-1.18527	0.117956	1561	0.00711829	0.816146	4	HUMAN	Q9BUF5	Tubulin beta-6 chain	-3.08368	1.22527
7	4	-0.697	-0.2931	0.616854	-1.18527	0.117956	1562	0.00710683	0.816146	7	HUMAN	O14737	Programmed cell death protein 5	-3.08368	1.22527
7	6	-0.697	-0.2931	0.616854	-1.18527	0.117956	1563	0.00709537	0.816146	7	HUMAN	Q5JTV8	Torsin-1A-interacting protein 1	-3.08368	1.22527
2	2	-0.698	-0.2941	0.616426	-1.18933	0.117155	1564	0.00708391	0.815581	2	HUMAN	Q96EC8	Protein YIPF6	-3.09351	1.22612
2	2	-0.698	-0.2941	0.616426	-1.18933	0.117155	1565	0.00707244	0.815581	2	HUMAN	P05204	Non-histone chromosomal protein HMG-17	-3.09351	1.22612
5	4	-0.698	-0.2941	0.616426	-1.18933	0.117155	1566	0.00706098	0.815581	5	HUMAN	Q9NUP9|O14910|Q9HAP6	Protein lin-7 homolog C	-3.09351	1.22612
52	13	-0.698	-0.2941	0.616426	-1.18933	0.117155	1567	0.00704952	0.815581	52	HUMAN	P13667	Protein disulfide-isomerase A4	-3.09351	1.22612
2	2	-0.699	-0.2951	0.615999	-1.19339	0.116358	1568	0.00703806	0.815016	2	HUMAN	O43837	Isocitrate dehydrogenase [NAD] subunit beta, mitochondrial	-3.10336	1.22697
4	4	-0.699	-0.2951	0.615999	-1.19339	0.116358	1569	0.00702659	0.815016	4	HUMAN	Q6YN16	Hydroxysteroid dehydrogenase-like protein 2	-3.10336	1.22697
4	3	-0.7	-0.2961	0.615572	-1.19745	0.115565	1572	0.00699221	0.814451	4	HUMAN	Q9BYD3	39S ribosomal protein L4, mitochondrial	-3.11322	1.22782
2	2	-0.701	-0.2971	0.615146	-1.20152	0.114776	1574	0.00696928	0.813887	2	HUMAN	Q9NV66|Q6NUM6	tRNA wybutosine-synthesizing protein 1 homolog	-3.12311	1.22867
5	4	-0.701	-0.2971	0.615146	-1.20152	0.114776	1575	0.00695782	0.813887	5	HUMAN	P53999	Activated RNA polymerase II transcriptional coactivator p15	-3.12311	1.22867
7	7	-0.701	-0.2971	0.615146	-1.20152	0.114776	1576	0.00694635	0.813887	7	HUMAN	Q9UDR5	Alpha-aminoadipic semialdehyde synthase, mitochondrial	-3.12311	1.22867
3	2	-0.703	-0.2991	0.614293	-1.20964	0.113209	1580	0.0069005	0.812759	3	HUMAN	Q9Y2G5	GDP-fucose protein O-fucosyltransferase 2	-3.14294	1.23038
3	3	-0.703	-0.2991	0.614293	-1.20964	0.113209	1581	0.00688904	0.812759	2	HUMAN	Q9BQ67	Glutamate-rich WD repeat-containing protein 1	-3.14294	1.23038
4	4	-0.703	-0.2991	0.614293	-1.20964	0.113209	1582	0.00687758	0.812759	4	HUMAN	Q9BZF9	Uveal autoantigen with coiled-coil domains and ankyrin repeats	-3.14294	1.23038
2	2	-0.704	-0.3001	0.613868	-1.2137	0.112431	1586	0.00683173	0.812196	2	HUMAN	Q9UK23	N-acetylglucosamine-1-phosphodiester alpha-N-acetylglucosaminidase	-3.15289	1.23123
2	2	-0.705	-0.3011	0.613442	-1.21776	0.111657	1588	0.0068088	0.811633	2	HUMAN	Q9NTK5	Obg-like ATPase 1	-3.16285	1.23208
4	2	-0.705	-0.3011	0.613442	-1.21776	0.111657	1589	0.00679734	0.811633	4	HUMAN	Q9UHQ4	B-cell receptor-associated protein 29	-3.16285	1.23208
4	3	-0.705	-0.3011	0.613442	-1.21776	0.111657	1590	0.00678588	0.811633	4	HUMAN	P50402	Emerin	-3.16285	1.23208
8	3	-0.705	-0.3011	0.613442	-1.21776	0.111657	1591	0.00677442	0.811633	8	HUMAN	P43034	Platelet-activating factor acetylhydrolase IB subunit alpha	-3.16285	1.23208
5	2	-0.706	-0.3021	0.613017	-1.22182	0.110887	1594	0.00674003	0.811071	5	HUMAN	Q6NUQ4	Transmembrane protein 214	-3.17284	1.23294
6	4	-0.706	-0.3021	0.613017	-1.22182	0.110887	1595	0.00672856	0.811071	6	HUMAN	P04062	Glucosylceramidase	-3.17284	1.23294
8	5	-0.706	-0.3021	0.613017	-1.22182	0.110887	1596	0.0067171	0.811071	8	HUMAN	O15498	Synaptobrevin homolog YKT6	-3.17284	1.23294
2	2	-0.707	-0.3031	0.612593	-1.22589	0.110121	1599	0.00668271	0.810509	2	HUMAN	O14524	Transmembrane protein 194A	-3.18284	1.23379
6	4	-0.707	-0.3031	0.612593	-1.22589	0.110121	1600	0.00667125	0.810509	6	HUMAN	Q9NXW2	DnaJ homolog subfamily B member 12	-3.18284	1.23379
2	2	-0.708	-0.3041	0.612168	-1.22995	0.109358	1603	0.00663686	0.809947	2	HUMAN	Q9NVV4	Poly(A) RNA polymerase, mitochondrial	-3.19286	1.23465
4	2	-0.708	-0.3041	0.612168	-1.22995	0.109358	1604	0.0066254	0.809947	4	HUMAN	P50213	Isocitrate dehydrogenase [NAD] subunit alpha, mitochondrial	-3.19286	1.23465
3	2	-0.71	-0.3061	0.61132	-1.23807	0.107845	1608	0.00657955	0.808825	3	HUMAN	O75695	Protein XRP2	-3.21297	1.23636
10	5	-0.711	-0.3071	0.610897	-1.24213	0.107094	1610	0.00655663	0.808265	10	HUMAN	Q7Z6Z7	E3 ubiquitin-protein ligase HUWE1	-3.22305	1.23722
20	8	-0.711	-0.3071	0.610897	-1.24213	0.107094	1611	0.00654516	0.808265	20	HUMAN	Q96HE7	ERO1-like protein alpha	-3.22305	1.23722
3	3	-0.713	-0.3091	0.61005	-1.25026	0.105603	1613	0.00652224	0.807145	3	HUMAN	Q9NP80	Calcium-independent phospholipase A2-gamma	-3.24328	1.23893
5	4	-0.713	-0.3091	0.61005	-1.25026	0.105603	1614	0.00651077	0.807145	5	HUMAN	Q99797	Mitochondrial intermediate peptidase	-3.24328	1.23893
18	9	-0.713	-0.3091	0.61005	-1.25026	0.105603	1615	0.00649931	0.807145	18	HUMAN	Q08380	Galectin-3-binding protein	-3.24328	1.23893
36	13	-0.713	-0.3091	0.61005	-1.25026	0.105603	1616	0.00648785	0.807145	36	HUMAN	P04843	Dolichyl-diphosphooligosaccharide--protein glycosyltransferase subunit 1	-3.24328	1.23893
5	3	-0.714	-0.3101	0.609628	-1.25432	0.104863	1619	0.00645346	0.806586	5	HUMAN	P07919	Cytochrome b-c1 complex subunit 6, mitochondrial	-3.25342	1.23979
8	7	-0.714	-0.3101	0.609628	-1.25432	0.104863	1620	0.006442	0.806586	8	HUMAN	O60271|Q9UPT6	C-Jun-amino-terminal kinase-interacting protein 4	-3.25342	1.23979
2	2	-0.716	-0.3121	0.608783	-1.26244	0.103395	1625	0.00638469	0.805468	2	HUMAN	O00421	C-C chemokine receptor-like 2	-3.27376	1.24151
3	3	-0.717	-0.3131	0.608361	-1.2665	0.102667	1628	0.0063503	0.80491	3	HUMAN	Q9HBH5	Retinol dehydrogenase 14	-3.28396	1.24237
3	3	-0.717	-0.3131	0.608361	-1.2665	0.102667	1629	0.00633884	0.80491	3	HUMAN	Q96JB6	Lysyl oxidase homolog 4	-3.28396	1.24237
20	12	-0.717	-0.3131	0.608361	-1.2665	0.102667	1630	0.00632737	0.80491	20	HUMAN	P11717	Cation-independent mannose-6-phosphate receptor	-3.28396	1.24237
7	5	-0.718	-0.3141	0.60794	-1.27056	0.101942	1634	0.00628152	0.804353	7	HUMAN	Q05682	Caldesmon	-3.29418	1.24324
2	2	-0.719	-0.3151	0.607518	-1.27463	0.101221	1636	0.0062586	0.803795	2	HUMAN	Q8NB49	Probable phospholipid-transporting ATPase IG	-3.30442	1.2441
3	3	-0.719	-0.3151	0.607518	-1.27463	0.101221	1637	0.00624713	0.803795	3	HUMAN	O76031	ATP-dependent Clp protease ATP-binding subunit clpX-like, mitochondrial	-3.30442	1.2441
11	6	-0.719	-0.3151	0.607518	-1.27463	0.101221	1638	0.00623567	0.803795	11	HUMAN	Q9UHD8	Septin-9	-3.30442	1.2441
3	2	-0.72	-0.3161	0.607097	-1.27869	0.100503	1639	0.00622421	0.803238	3	HUMAN	O00592	Podocalyxin	-3.31468	1.24496
5	4	-0.721	-0.3171	0.606677	-1.28275	0.0997899	1641	0.00620128	0.802682	5	HUMAN	P26440	Isovaleryl-CoA dehydrogenase, mitochondrial	-3.32496	1.24582
2	2	-0.722	-0.3181	0.606256	-1.28681	0.09908	1642	0.00618982	0.802126	2	HUMAN	Q96JB1	Dynein heavy chain 8, axonemal	-3.33526	1.24669
2	2	-0.723	-0.3191	0.605836	-1.29087	0.0983738	1643	0.00617836	0.80157	2	HUMAN	Q8NHG8	E3 ubiquitin-protein ligase ZNRF2	-3.34558	1.24755
8	5	-0.724	-0.3201	0.605417	-1.29494	0.0976713	1644	0.0061669	0.801014	8	HUMAN	Q08378	Golgin subfamily A member 3	-3.35592	1.24842
2	2	-0.725	-0.3211	0.604997	-1.299	0.0969725	1647	0.00613251	0.800459	2	HUMAN	O95772	MLN64 N-terminal domain homolog	-3.36628	1.24928
3	3	-0.725	-0.3211	0.604997	-1.299	0.0969725	1648	0.00612105	0.800459	3	HUMAN	O75439	Mitochondrial-processing peptidase subunit beta	-3.36628	1.24928
9	5	-0.725	-0.3211	0.604997	-1.299	0.0969725	1649	0.00610958	0.800459	9	HUMAN	Q9UJS0	Calcium-binding mitochondrial carrier protein Aralar2	-3.36628	1.24928
16	7	-0.725	-0.3211	0.604997	-1.299	0.0969725	1650	0.00609812	0.800459	16	HUMAN	P13797|P13796	Plastin-3	-3.36628	1.24928
33	22	-0.726	-0.3221	0.604578	-1.30306	0.0962774	1652	0.00607519	0.799905	33	HUMAN	Q14315	Filamin-C	-3.37666	1.25015
5	2	-0.729	-0.3251	0.603322	-1.31524	0.094214	1655	0.00604081	0.798243	5	HUMAN	Q9H299	SH3 domain-binding glutamic acid-rich-like protein 3	-3.40791	1.25275
2	2	-0.729	-0.3251	0.603322	-1.31524	0.094214	1656	0.00602934	0.798243	2	HUMAN	P12110	Collagen alpha-2(VI) chain	-3.40791	1.25275
2	2	-0.73	-0.3261	0.602904	-1.31931	0.0935335	1658	0.00600642	0.79769	2	HUMAN	P33897	ATP-binding cassette sub-family D member 1	-3.41837	1.25362
2	2	-0.73	-0.3261	0.602904	-1.31931	0.0935335	1659	0.00599496	0.79769	2	HUMAN	P36551	Coproporphyrinogen-III oxidase, mitochondrial	-3.41837	1.25362
4	3	-0.732	-0.3281	0.602069	-1.32743	0.0921834	1663	0.00594911	0.796585	4	HUMAN	Q6IAN0	Dehydrogenase/reductase SDR family member 7B	-3.43935	1.25536
4	3	-0.732	-0.3281	0.602069	-1.32743	0.0921834	1664	0.00593764	0.796585	4	HUMAN	Q00796	Sorbitol dehydrogenase	-3.43935	1.25536
9	7	-0.732	-0.3281	0.602069	-1.32743	0.0921834	1665	0.00592618	0.796585	9	HUMAN	Q9BRK5	45 kDa calcium-binding protein	-3.43935	1.25536
4	2	-0.733	-0.3291	0.601652	-1.33149	0.0915138	1667	0.00590326	0.796033	4	HUMAN	P12004	Proliferating cell nuclear antigen	-3.44987	1.25623
6	3	-0.733	-0.3291	0.601652	-1.33149	0.0915138	1668	0.00589179	0.796033	6	HUMAN	Q6UXV4	Apolipoprotein O-like	-3.44987	1.25623
21	9	-0.733	-0.3291	0.601652	-1.33149	0.0915138	1669	0.00588033	0.796033	21	HUMAN	Q15084	Protein disulfide-isomerase A6	-3.44987	1.25623
2	2	-0.735	-0.3311	0.600818	-1.33961	0.0901854	1673	0.00583448	0.79493	2	HUMAN	P19971	Thymidine phosphorylase	-3.47096	1.25797
2	2	-0.735	-0.3311	0.600818	-1.33961	0.0901854	1674	0.00582302	0.79493	2	HUMAN	P26368	Splicing factor U2AF 65 kDa subunit	-3.47096	1.25797
2	2	-0.737	-0.3331	0.599986	-1.34774	0.0888714	1678	0.00577717	0.793829	2	HUMAN	Q8TB96	T-cell immunomodulatory protein	-3.49214	1.25972
2	2	-0.74	-0.3361	0.598739	-1.35992	0.0869272	1685	0.00569693	0.79218	2	HUMAN	Q9ULA0	Aspartyl aminopeptidase	-3.52405	1.26234
5	3	-0.74	-0.3361	0.598739	-1.35992	0.0869272	1686	0.00568547	0.79218	5	HUMAN	Q86X29	Lipolysis-stimulated lipoprotein receptor	-3.52405	1.26234
11	6	-0.74	-0.3361	0.598739	-1.35992	0.0869272	1687	0.005674	0.79218	11	HUMAN	P41250	Glycine--tRNA ligase	-3.52405	1.26234
2	2	-0.742	-0.3381	0.59791	-1.36805	0.0856488	1689	0.00565108	0.791082	2	HUMAN	Q9GZT3	SRA stem-loop-interacting RNA-binding protein, mitochondrial	-3.54542	1.26409
4	2	-0.743	-0.3391	0.597496	-1.37211	0.0850149	1693	0.00560523	0.790534	4	HUMAN	Q14165	Malectin	-3.55614	1.26497
5	2	-0.743	-0.3391	0.597496	-1.37211	0.0850149	1694	0.00559376	0.790534	5	HUMAN	O75489	NADH dehydrogenase [ubiquinone] iron-sulfur protein 3, mitochondrial	-3.55614	1.26497
2	2	-0.743	-0.3391	0.597496	-1.37211	0.0850149	1695	0.0055823	0.790534	2	HUMAN	Q9BSF4	Uncharacterized protein C19orf52	-3.55614	1.26497
4	3	-0.743	-0.3391	0.597496	-1.37211	0.0850149	1696	0.00557084	0.790534	4	HUMAN	P30042	ES1 protein homolog, mitochondrial	-3.55614	1.26497
5	5	-0.744	-0.3401	0.597082	-1.37617	0.0843845	1697	0.00555938	0.789987	5	HUMAN	Q9BRQ6	Coiled-coil-helix-coiled-coil-helix domain-containing protein 6, mitochondrial	-3.56688	1.26584
9	6	-0.744	-0.3401	0.597082	-1.37617	0.0843845	1698	0.00554791	0.789987	9	HUMAN	Q8NC56	LEM domain-containing protein 2	-3.56688	1.26584
2	2	-0.746	-0.3421	0.596254	-1.38429	0.0831343	1700	0.00552499	0.788892	2	HUMAN	Q8NBP0	Tetratricopeptide repeat protein 13	-3.58841	1.2676
3	3	-0.747	-0.3431	0.595841	-1.38835	0.0825145	1703	0.0054906	0.788346	3	HUMAN	P51570	Galactokinase	-3.59921	1.26848
38	10	-0.748	-0.3441	0.595428	-1.39242	0.0818981	1704	0.00547914	0.787799	38	HUMAN	Q99798	Aconitate hydratase, mitochondrial	-3.61003	1.26936
22	10	-0.748	-0.3441	0.595428	-1.39242	0.0818981	1705	0.00546768	0.787799	22	HUMAN	Q02818	Nucleobindin-1	-3.61003	1.26936
7	4	-0.749	-0.3451	0.595016	-1.39648	0.0812852	1706	0.00545621	0.787253	7	HUMAN	Q96RP9	Elongation factor G, mitochondrial	-3.62086	1.27024
3	2	-0.75	-0.3461	0.594604	-1.40054	0.0806758	1707	0.00544475	0.786708	3	HUMAN	P09913	Interferon-induced protein with tetratricopeptide repeats 2	-3.63172	1.27112
2	2	-0.751	-0.3471	0.594192	-1.4046	0.0800698	1710	0.00541036	0.786163	2	HUMAN	Q9BSH4	Translational activator of cytochrome c oxidase 1	-3.6426	1.272
5	2	-0.752	-0.3481	0.59378	-1.40866	0.0794673	1714	0.00536451	0.785618	5	HUMAN	Q13232	Nucleoside diphosphate kinase 3	-3.65349	1.27288
3	2	-0.754	-0.3501	0.592957	-1.41679	0.0782726	1717	0.00533012	0.78453	3	HUMAN	Q9Y3A5	Ribosome maturation protein SBDS	-3.67535	1.27465
4	3	-0.754	-0.3501	0.592957	-1.41679	0.0782726	1718	0.00531866	0.78453	4	HUMAN	Q9BUH6	Uncharacterized protein C9orf142	-3.67535	1.27465
3	3	-0.755	-0.3511	0.592546	-1.42085	0.0776803	1721	0.00528427	0.783986	3	HUMAN	P22033	Methylmalonyl-CoA mutase, mitochondrial	-3.68631	1.27553
11	4	-0.755	-0.3511	0.592546	-1.42085	0.0776803	1722	0.00527281	0.783986	11	HUMAN	P07602	Proactivator polypeptide	-3.68631	1.27553
10	4	-0.756	-0.3521	0.592136	-1.42491	0.0770915	1724	0.00524989	0.783443	10	HUMAN	Q16836	Hydroxyacyl-coenzyme A dehydrogenase, mitochondrial	-3.69728	1.27642
9	8	-0.756	-0.3521	0.592136	-1.42491	0.0770915	1725	0.00523842	0.783443	9	HUMAN	Q8NBJ4	Golgi membrane protein 1	-3.69728	1.27642
2	2	-0.757	-0.3531	0.591726	-1.42897	0.0765061	1726	0.00522696	0.7829	2	HUMAN	P28062	Proteasome subunit beta type-8	-3.70828	1.2773
4	3	-0.757	-0.3531	0.591726	-1.42897	0.0765061	1727	0.0052155	0.7829	4	HUMAN	Q7L5N7	Lysophosphatidylcholine acyltransferase 2	-3.70828	1.2773
14	3	-0.76	-0.3561	0.590496	-1.44116	0.0747701	1730	0.00518111	0.781274	14	HUMAN	Q9BVC6	Transmembrane protein 109	-3.7414	1.27996
14	7	-0.76	-0.3561	0.590496	-1.44116	0.0747701	1731	0.00516965	0.781274	14	HUMAN	Q12797	Aspartyl/asparaginyl beta-hydroxylase	-3.7414	1.27996
2	2	-0.761	-0.3571	0.590087	-1.44522	0.0741981	1732	0.00515818	0.780732	2	HUMAN	Q96CM8	Acyl-CoA synthetase family member 2, mitochondrial	-3.75247	1.28085
4	3	-0.765	-0.3611	0.588453	-1.46147	0.0719438	1736	0.00511233	0.778571	4	HUMAN	Q92665	28S ribosomal protein S31, mitochondrial	-3.79699	1.2844
33	10	-0.765	-0.3611	0.588453	-1.46147	0.0719438	1737	0.00510087	0.778571	33	HUMAN	P01892|P10316|P01891	HLA class I histocompatibility antigen, A-2 alpha chain	-3.79699	1.2844
3	2	-0.768	-0.3641	0.587231	-1.47365	0.0702877	1743	0.0050321	0.776953	3	HUMAN	P37235|P61601|P84074	Hippocalcin-like protein 1	-3.83058	1.28708
3	3	-0.768	-0.3641	0.587231	-1.47365	0.0702877	1744	0.00502063	0.776953	3	HUMAN	P80303	Nucleobindin-2	-3.83058	1.28708
6	4	-0.77	-0.3661	0.586417	-1.48177	0.0692001	1747	0.00498624	0.775877	6	HUMAN	O94925	Glutaminase kidney isoform, mitochondrial	-3.85308	1.28886
4	2	-0.771	-0.3671	0.586011	-1.48584	0.0686612	1751	0.00494039	0.775339	4	HUMAN	Q9BTY7|P0CB43	Protein FAM203A	-3.86436	1.28976
15	8	-0.771	-0.3671	0.586011	-1.48584	0.0686612	1752	0.00492893	0.775339	15	HUMAN	Q5JPE7|Q15155|P69849	Nodal modulator 2	-3.86436	1.28976
5	4	-0.772	-0.3681	0.585605	-1.4899	0.0681255	1753	0.00491747	0.774802	5	HUMAN	Q03169	Tumor necrosis factor alpha-induced protein 2	-3.87566	1.29065
3	2	-0.775	-0.3711	0.584389	-1.50208	0.0665378	1759	0.00484869	0.773193	3	HUMAN	P07203	Glutathione peroxidase 1	-3.90968	1.29334
4	2	-0.775	-0.3711	0.584389	-1.50208	0.0665378	1760	0.00483723	0.773193	4	HUMAN	Q9NVS9	Pyridoxine-5'-phosphate oxidase	-3.90968	1.29334
5	3	-0.776	-0.3721	0.583984	-1.50615	0.0660149	1762	0.00481431	0.772657	5	HUMAN	Q7Z449	Cytochrome P450 2U1	-3.92106	1.29424
3	2	-0.777	-0.3731	0.583579	-1.51021	0.0654953	1764	0.00479138	0.772122	3	HUMAN	Q15056	Eukaryotic translation initiation factor 4H	-3.93247	1.29513
3	2	-0.778	-0.3741	0.583175	-1.51427	0.0649788	1765	0.00477992	0.771587	3	HUMAN	P51688	N-sulphoglucosamine sulphohydrolase	-3.94389	1.29603
7	2	-0.779	-0.3751	0.582771	-1.51833	0.0644655	1767	0.00475699	0.771052	7	HUMAN	Q9H490	Phosphatidylinositol glycan anchor biosynthesis class U protein	-3.95533	1.29693
9	3	-0.779	-0.3751	0.582771	-1.51833	0.0644655	1768	0.00474553	0.771052	9	HUMAN	Q9BUR5	Apolipoprotein O	-3.95533	1.29693
4	4	-0.779	-0.3751	0.582771	-1.51833	0.0644655	1769	0.00473407	0.771052	4	HUMAN	O75179	Ankyrin repeat domain-containing protein 17	-3.95533	1.29693
4	4	-0.78	-0.3761	0.582367	-1.52239	0.0639554	1771	0.00471114	0.770518	4	HUMAN	Q969Z0	Protein TBRG4	-3.96679	1.29783
3	3	-0.783	-0.3791	0.581157	-1.53458	0.0624438	1775	0.00466529	0.768917	3	HUMAN	P30837	Aldehyde dehydrogenase X, mitochondrial	-4.0013	1.30053
8	5	-0.783	-0.3791	0.581157	-1.53458	0.0624438	1776	0.00465383	0.768917	8	HUMAN	Q9H0U3	Magnesium transporter protein 1	-4.0013	1.30053
4	2	-0.784	-0.3801	0.580754	-1.53864	0.0619462	1778	0.0046309	0.768384	4	HUMAN	P50453	Serpin B9	-4.01284	1.30143
23	10	-0.784	-0.3801	0.580754	-1.53864	0.0619462	1779	0.00461944	0.768384	23	HUMAN	Q9NX63	Coiled-coil-helix-coiled-coil-helix domain-containing protein 3, mitochondrial	-4.01284	1.30143
72	29	-0.784	-0.3801	0.580754	-1.53864	0.0619462	1780	0.00460798	0.768384	72	HUMAN	P21333	Filamin-A	-4.01284	1.30143
9	7	-0.786	-0.3821	0.57995	-1.54676	0.0609602	1783	0.00457359	0.76732	9	HUMAN	P31150	Rab GDP dissociation inhibitor alpha	-4.03599	1.30324
6	2	-0.788	-0.3841	0.579146	-1.55489	0.0599866	1787	0.00452774	0.766257	6	HUMAN	O75787	Renin receptor	-4.05922	1.30505
13	5	-0.789	-0.3851	0.578745	-1.55895	0.0595043	1788	0.00451628	0.765726	13	HUMAN	Q9UHG3	Prenylcysteine oxidase 1	-4.07086	1.30595
7	3	-0.79	-0.3861	0.578344	-1.56301	0.0590252	1792	0.00447043	0.765195	7	HUMAN	P16152	Carbonyl reductase [NADPH] 1	-4.08253	1.30686
6	3	-0.791	-0.3871	0.577943	-1.56707	0.058549	1793	0.00445896	0.764665	6	HUMAN	Q8IY95	Transmembrane protein 192	-4.09421	1.30776
4	2	-0.792	-0.3881	0.577543	-1.57113	0.0580759	1794	0.0044475	0.764135	4	HUMAN	Q96ND0	Protein FAM210A	-4.10592	1.30867
21	5	-0.794	-0.3901	0.576743	-1.57926	0.0571386	1795	0.00443604	0.763077	28	HUMAN	Q07000|P30501|Q29963|P30505|P30508|P13746|P04439|P16188|Q9TNN7|P30455|P30443|P01893|Q29960	HLA class I histocompatibility antigen, Cw-15 alpha chain	-4.12939	1.31048
9	5	-0.794	-0.3901	0.576743	-1.57926	0.0571386	1796	0.00442458	0.763077	9	HUMAN	Q92544	Transmembrane 9 superfamily member 4	-4.12939	1.31048
3	3	-0.795	-0.3911	0.576343	-1.58332	0.0566745	1797	0.00441311	0.762548	3	HUMAN	P52788	Spermine synthase	-4.14116	1.31139
3	2	-0.798	-0.3941	0.575146	-1.5955	0.0552998	1800	0.00437873	0.760964	3	HUMAN	Q9P0J1	[Pyruvate dehydrogenase [acetyl-transferring]]-phosphatase 1, mitochondrial	-4.17658	1.31412
13	5	-0.798	-0.3941	0.575146	-1.5955	0.0552998	1801	0.00436726	0.760964	13	HUMAN	Q8NBJ7	Sulfatase-modifying factor 2	-4.17658	1.31412
8	6	-0.798	-0.3941	0.575146	-1.5955	0.0552998	1802	0.0043558	0.760964	8	HUMAN	Q8IXB1	DnaJ homolog subfamily C member 10	-4.17658	1.31412
4	4	-0.8	-0.3961	0.574349	-1.60363	0.0543981	1805	0.00432141	0.75991	4	HUMAN	Q4G0N4	NAD kinase domain-containing protein 1	-4.2003	1.31595
6	2	-0.801	-0.3971	0.573951	-1.60769	0.0539517	1808	0.00428702	0.759383	6	HUMAN	P30043	Flavin reductase (NADPH)	-4.21219	1.31686
2	2	-0.801	-0.3971	0.573951	-1.60769	0.0539517	1809	0.00427556	0.759383	2	HUMAN	Q9NPL8	Translocase of inner mitochondrial membrane domain-containing protein 1	-4.21219	1.31686
8	4	-0.801	-0.3971	0.573951	-1.60769	0.0539517	1810	0.0042641	0.759383	8	HUMAN	Q96B97	SH3 domain-containing kinase-binding protein 1	-4.21219	1.31686
12	5	-0.802	-0.3981	0.573554	-1.61175	0.0535081	1811	0.00425264	0.758857	12	HUMAN	Q9Y383	Putative RNA-binding protein Luc7-like 2	-4.2241	1.31777
4	3	-0.803	-0.3991	0.573156	-1.61581	0.0530674	1813	0.00422971	0.758331	4	HUMAN	Q969P0|Q5MIZ7	Immunoglobulin superfamily member 8	-4.23603	1.31869
5	4	-0.804	-0.4001	0.572759	-1.61987	0.0526297	1815	0.00420679	0.757806	5	HUMAN	Q9BYC5	Alpha-(1,6)-fucosyltransferase	-4.24798	1.3196
7	5	-0.804	-0.4001	0.572759	-1.61987	0.0526297	1816	0.00419532	0.757806	7	HUMAN	Q9Y4P3	Transducin beta-like protein 2	-4.24798	1.3196
4	2	-0.807	-0.4031	0.571569	-1.63206	0.0513335	1820	0.00414947	0.756232	4	HUMAN	Q8IVL5	Prolyl 3-hydroxylase 2	-4.28396	1.32235
7	3	-0.807	-0.4031	0.571569	-1.63206	0.0513335	1821	0.00413801	0.756232	7	HUMAN	Q9BUP3	Oxidoreductase HTATIP2	-4.28396	1.32235
8	3	-0.808	-0.4041	0.571173	-1.63612	0.0509071	1824	0.00410362	0.755708	8	HUMAN	P04259|P02538|P48668	Keratin, type II cytoskeletal 6B	-4.29599	1.32326
6	3	-0.808	-0.4041	0.571173	-1.63612	0.0509071	1825	0.00409216	0.755708	6	HUMAN	P19256	Lymphocyte function-associated antigen 3	-4.29599	1.32326
7	3	-0.809	-0.4051	0.570777	-1.64018	0.0504836	1826	0.0040807	0.755184	7	HUMAN	P13674	Prolyl 4-hydroxylase subunit alpha-1	-4.30804	1.32418
13	5	-0.809	-0.4051	0.570777	-1.64018	0.0504836	1827	0.00406923	0.755184	13	HUMAN	O43505	N-acetyllactosaminide beta-1,3-N-acetylglucosaminyltransferase	-4.30804	1.32418
2	2	-0.811	-0.4071	0.569987	-1.64831	0.0496449	1828	0.00405777	0.754138	2	HUMAN	Q495W5	Alpha-(1,3)-fucosyltransferase 11	-4.33221	1.32602
2	2	-0.813	-0.4091	0.569197	-1.65643	0.0488174	1830	0.00403485	0.753093	2	HUMAN	Q8TC07	TBC1 domain family member 15	-4.35646	1.32786
4	3	-0.814	-0.4101	0.568803	-1.66049	0.0484078	1833	0.00400046	0.752571	4	HUMAN	Q9NTX5	Ethylmalonyl-CoA decarboxylase	-4.36862	1.32878
16	10	-0.816	-0.4121	0.568015	-1.66861	0.0475969	1836	0.00396607	0.751529	16	HUMAN	P09525	Annexin A4	-4.39299	1.33062
92	16	-0.817	-0.4131	0.567621	-1.67268	0.0471955	1840	0.00392022	0.751008	92	HUMAN	P10809	60 kDa heat shock protein, mitochondrial	-4.40521	1.33154
3	2	-0.819	-0.4151	0.566835	-1.6808	0.0464009	1842	0.00389729	0.749968	3	HUMAN	Q9UGM6	Tryptophan--tRNA ligase, mitochondrial	-4.4297	1.33339
14	8	-0.821	-0.4171	0.566049	-1.68892	0.045617	1843	0.00388583	0.748929	14	HUMAN	P00558	Phosphoglycerate kinase 1	-4.45428	1.33524
12	7	-0.822	-0.4181	0.565657	-1.69299	0.0452291	1844	0.00387437	0.74841	12	HUMAN	Q96AQ6	Pre-B-cell leukemia transcription factor-interacting protein 1	-4.4666	1.33617
40	12	-0.822	-0.4181	0.565657	-1.69299	0.0452291	1845	0.00386291	0.74841	40	HUMAN	Q12931	Heat shock protein 75 kDa, mitochondrial	-4.4666	1.33617
9	6	-0.825	-0.4211	0.564482	-1.70517	0.0440813	1847	0.00383998	0.746855	9	HUMAN	O14936	Peripheral plasma membrane protein CASK	-4.50369	1.33895
46	16	-0.826	-0.4221	0.564091	-1.70923	0.043704	1849	0.00381706	0.746337	46	HUMAN	Q14697	Neutral alpha-glucosidase AB	-4.51609	1.33988
13	5	-0.827	-0.4231	0.5637	-1.71329	0.0433292	1852	0.00378267	0.74582	13	HUMAN	Q8NBS9	Thioredoxin domain-containing protein 5	-4.52852	1.34081
19	6	-0.827	-0.4231	0.5637	-1.71329	0.0433292	1853	0.00377121	0.74582	19	HUMAN	Q14108	Lysosome membrane protein 2	-4.52852	1.34081
4	3	-0.832	-0.4281	0.56175	-1.7336	0.0414943	1861	0.0036795	0.74324	4	HUMAN	Q9H936	Mitochondrial glutamate carrier 1	-4.59094	1.34546
2	2	-0.837	-0.4331	0.559806	-1.75391	0.0397228	1864	0.00364512	0.740669	2	HUMAN	Q9BRF8	Calcineurin-like phosphoesterase domain-containing protein 1	-4.65389	1.35013
5	2	-0.839	-0.4351	0.559031	-1.76203	0.0390317	1867	0.00361073	0.739642	5	HUMAN	Q8NBX0	Saccharopine dehydrogenase-like oxidoreductase	-4.67921	1.352
2	2	-0.839	-0.4351	0.559031	-1.76203	0.0390317	1868	0.00359927	0.739642	2	HUMAN	P62899	60S ribosomal protein L31	-4.67921	1.352
4	3	-0.839	-0.4351	0.559031	-1.76203	0.0390317	1869	0.0035878	0.739642	4	HUMAN	P16435	NADPH--cytochrome P450 reductase	-4.67921	1.352
2	2	-0.841	-0.4371	0.558256	-1.77016	0.0383504	1872	0.00355342	0.738618	2	HUMAN	Q13158	Protein FADD	-4.70462	1.35388
3	2	-0.842	-0.4381	0.55787	-1.77422	0.0380134	1874	0.00353049	0.738106	3	HUMAN	Q13064	Probable E3 ubiquitin-protein ligase makorin-3	-4.71735	1.35482
33	14	-0.842	-0.4381	0.55787	-1.77422	0.0380134	1875	0.00351903	0.738106	33	HUMAN	Q9NSE4	Isoleucine--tRNA ligase, mitochondrial	-4.71735	1.35482
8	4	-0.843	-0.4391	0.557483	-1.77828	0.0376788	1876	0.00350757	0.737595	8	HUMAN	Q6NVY1	3-hydroxyisobutyryl-CoA hydrolase, mitochondrial	-4.7301	1.35576
2	2	-0.844	-0.4401	0.557097	-1.78234	0.0373466	1877	0.0034961	0.737084	2	HUMAN	Q3ZCQ8	Mitochondrial import inner membrane translocase subunit TIM50	-4.74288	1.3567
5	4	-0.844	-0.4401	0.557097	-1.78234	0.0373466	1878	0.00348464	0.737084	5	HUMAN	Q6ZRP7	Sulfhydryl oxidase 2	-4.74288	1.3567
3	2	-0.846	-0.4421	0.556325	-1.79047	0.0366894	1881	0.00345025	0.736062	3	HUMAN	P82932	28S ribosomal protein S6, mitochondrial	-4.76849	1.35858
32	15	-0.846	-0.4421	0.556325	-1.79047	0.0366894	1882	0.00343879	0.736062	32	HUMAN	P04264	Keratin, type II cytoskeletal 1	-4.76849	1.35858
4	3	-0.848	-0.4441	0.555554	-1.79859	0.0360417	1884	0.00341586	0.735043	4	HUMAN	O43760	Synaptogyrin-2	-4.79419	1.36047
4	4	-0.848	-0.4441	0.555554	-1.79859	0.0360417	1885	0.0034044	0.735043	4	HUMAN	Q9UNZ2	NSFL1 cofactor p47	-4.79419	1.36047
14	4	-0.848	-0.4441	0.555554	-1.79859	0.0360417	1886	0.00339294	0.735043	14	HUMAN	P12235	ADP/ATP translocase 1	-4.79419	1.36047
28	7	-0.848	-0.4441	0.555554	-1.79859	0.0360417	1887	0.00338148	0.735043	28	HUMAN	Q6NUK1	Calcium-binding mitochondrial carrier protein SCaMC-1	-4.79419	1.36047
5	3	-0.851	-0.4471	0.5544	-1.81078	0.0350878	1889	0.00335855	0.733516	5	HUMAN	Q9BV79	Trans-2-enoyl-CoA reductase, mitochondrial	-4.83289	1.3633
2	2	-0.852	-0.4481	0.554016	-1.81484	0.0347744	1890	0.00334709	0.733008	2	HUMAN	Q8IX90	Spindle and kinetochore-associated protein 3	-4.84583	1.36424
21	12	-0.852	-0.4481	0.554016	-1.81484	0.0347744	1891	0.00333563	0.733008	21	HUMAN	P22314	Ubiquitin-like modifier-activating enzyme 1	-4.84583	1.36424
2	2	-0.853	-0.4491	0.553632	-1.8189	0.0344634	1892	0.00332416	0.7325	2	HUMAN	O75368	SH3 domain-binding glutamic acid-rich-like protein	-4.85879	1.36519
11	4	-0.853	-0.4491	0.553632	-1.8189	0.0344634	1893	0.0033127	0.7325	11	HUMAN	P04181	Ornithine aminotransferase, mitochondrial	-4.85879	1.36519
29	6	-0.854	-0.4501	0.553249	-1.82296	0.0341546	1894	0.00330124	0.731992	31	HUMAN	P30453|P30457|P30459|P16189|P16190|P18462|P30450|P30456|P10314|P30512|Q09160	HLA class I histocompatibility antigen, A-34 alpha chain	-4.87177	1.36613
6	5	-0.856	-0.4521	0.552482	-1.83108	0.033544	1896	0.00327831	0.730978	6	HUMAN	Q9BYN8	28S ribosomal protein S26, mitochondrial	-4.8978	1.36803
4	3	-0.857	-0.4531	0.552099	-1.83515	0.033242	1897	0.00326685	0.730472	4	HUMAN	Q03519	Antigen peptide transporter 2	-4.91085	1.36898
31	7	-0.858	-0.4541	0.551717	-1.83921	0.0329423	1899	0.00324392	0.729965	31	HUMAN	P30040	Endoplasmic reticulum resident protein 29	-4.92391	1.36993
[truncated: 182 more rows]

## Sheet: F
	from 2/12/19 western blot3				from 4/17/19 western						from 2/12/19 western blot 1
	MDA+_1	MDA-1	MDA+2	MDA-2	MDA+3	MDA-3	MDA+4	MDA-4	MDA+4	MDA-5	MDA+6	MDA-6
	INV	NON	INV	NON	INV	NON	INV	NON	INV	NON	INV	NON
Tg2	2688.91	5470.98	2715.79	7309.81	4018.47	12698.4	3569.52	12467.5	1872.38	4142	761.991	3297.62
GAPDH	44454.7	41785.5	27221.7	6869.83	8314.95	3548.22	8103.85	5076.71	12373.4	4403.18	8508	8418
Tg2/Gapdh	0.0604866	0.13093	0.0997657	1.06405	0.483282	3.5788	0.440472	2.45581	0.151323	0.940686	0.0895617	0.391734
Norm	1	2.16461	1	10.6654	1	7.4052	1	5.57542	1	6.21642	1	4.3739

## Sheet: H
	MV+1	MV-1	MV+2	MV-2	MV+3	MV-3
Tg2	916.062	3631.91	513.213	1209.04	560.87	7373.47
flot2	8702.69	7372.71	5776.86	2935.38	7422.35	9220.42
Tg2/Gapdh	0.105262	0.492616	0.0888394	0.411887	0.075565	0.799689
Norm	1	4.6799	1	4.6363	1	10.5828
