# Supplementary material for: Weakly migratory metastatic breast cancer cells activate fibroblasts via microvesicle-Tg2 to facilitate dissemination and metastasis
Source: eLife journal article supplement (doi:10.7554/elife.74433), 2022-12-06
Supplement: supp [file Source Data Figure 4 - SuppFig1.xlsx]

## Sheet: B
Tg2 KD
	Normal	PLKO	shTg2
Tg2	6747.28	4870.91	63.364
GAPDH	5213.62	3009.67	2735.96
Tg2/GAPDH	1.29416	1.61842	0.0231597

## Sheet: C
	Fraction of Cells Motile
	MDA- (scr)	MDA- (shTg2)
Rep1	0.225141	0.120651
	0.144834	0.195532
Rep2	0.171323	0.190843
	0.17924	0.232948
Rep3	0.084195	0.14081
	0.083121	0.120713

## Sheet: D
	# MVs/Cell/Hour
	MDA- (scr)	MDA- (shTg2)
Rep1	2.6999	13.3869
Rep2	7.93651	5.20833
Rep3	2.25453	9.17405
Rep4	0.87146	1.48384
Rep5	0.60771	1.08086
Rep6	2.28758	0.65585
Rep7	1.0043	1.18016

## Sheet: E
	Fraction of Cells Invading Through Transwell
	MDA- (scr)	MDA- (shTg2)
Rep1	0.215	0.128
	0.175	0.138
Rep2	0.267	0.147
	0.254	0.135
Rep3	0.313	0.178
	0.262	0.206

## Sheet: G
42319	shTg2 MV expression
	pLKO	shTg2
Tg2	2961.81	62.364
Flotillin	18442.5	20964
Tg2/Flot2	0.160597	0.00297482

## Sheet: HIJK
original_row	protein_fdr_confidence	master	accession	description	coverage	_peptides	_psms	_unique_peptides	_protein_groups	_aas	found_in_sample_s59_f10_130_sample	found_in_sample_s60_f10_131_control	abundance_ratio_130_131	abundance_ratio_log2_130_131.x	abundance_f10_130_sample	abundance_f10_131_control	_razor_peptides	score_sequest_ht	_peptides_sequest_ht	abundance_ratio_log2_130_131.y	normalized_log2	z_score	p_value	rank	b_h	significant	normalized_fc
3238	High	Master Protein	Q9H0A8	COMM domain-containing protein 4 OS=Homo sapiens GN=COMMD4 PE=1 SV=1	17.5879	3	3	3	1	199	High	High	0.344	-1.54	71392.2	207505	0	0	3	-1.54	-1.612	-7.58345	1.68247e-14	3238	7.72082e-06	TRUE	0.327144
3237	High	Master Protein	P05204	Non-histone chromosomal protein HMG-17 OS=Homo sapiens GN=HMGN2 PE=1 SV=3	28.8889	3	7	3	1	90	High	High	0.48	-1.06	698344	1.45563e+06	0	14.45	3	-1.06	-1.132	-5.32813	4.96156e-08	3232	5.40457e-05	TRUE	0.456282
3235	High	Master Protein	Q969Q5	Ras-related protein Rab-24 OS=Homo sapiens GN=RAB24 PE=1 SV=1	12.3153	2	3	2	1	203	High	High	0.534	-0.91	177827	333242	0	7.34	2	-0.91	-0.982001	-4.62334	1.88806e-06	3228	8.4929e-05	TRUE	0.506277
3236	High	Master Protein	Q7Z6B0	Coiled-coil domain-containing protein 91 OS=Homo sapiens GN=CCDC91 PE=1 SV=2	3.62812	2	2	2	1	441	High	High	0.533	-0.91	295940	555482	0	2.13	2	-0.91	-0.982001	-4.62334	1.88806e-06	3229	7.72082e-05	TRUE	0.506277
3233	High	Master Protein	O43854	EGF-like repeat and discoidin I-like domain-containing protein 3 OS=Homo sapiens GN=EDIL3 PE=1 SV=1	37.7083	18	65	18	1	480	High	High	0.555	-0.85	7.98045e+06	1.43671e+07	0	157.65	18	-0.85	-0.922001	-4.34142	7.07813e-06	3226	0.000100371	TRUE	0.527776
3234	High	Master Protein	Q9HAU5	Regulator of nonsense transcripts 2 OS=Homo sapiens GN=UPF2 PE=1 SV=1	1.96541	2	2	2	1	1272	High	High	0.554	-0.85	4009.43	7242.87	0	2.13	2	-0.85	-0.922001	-4.34142	7.07813e-06	3227	9.26498e-05	TRUE	0.527776
3232	High	Master Protein	P31949	Protein S100-A11 OS=Homo sapiens GN=S100A11 PE=1 SV=2	52.381	6	16	6	1	105	High	High	0.566	-0.82	3.08063e+06	5.44757e+06	0	42.21	6	-0.82	-0.892001	-4.20047	1.33183e-05	3225	0.000108091	TRUE	0.538866
3231	High	Master Protein	P09972	Fructose-bisphosphate aldolase C OS=Homo sapiens GN=ALDOC PE=1 SV=2	20.8791	7	16	2	1	364	High	High	0.585	-0.77	27150.1	46397.5	0	38.21	7	-0.77	-0.842001	-3.96554	3.66155e-05	3224	0.000115812	TRUE	0.557869
3229	High	Master Protein	P21980	Protein-glutamine gamma-glutamyltransferase 2 OS=Homo sapiens GN=TGM2 PE=1 SV=2	39.738	24	95	24	1	687	High	High	0.612	-0.71	1.33317e+07	2.17714e+07	0	266.05	24	-0.71	-0.782001	-3.68362	0.000114972	3221	0.000138975	TRUE	0.58156
3230	High	Master Protein	Q02241	Kinesin-like protein KIF23 OS=Homo sapiens GN=KIF23 PE=1 SV=3	11.6667	10	17	10	1	960	High	High	0.612	-0.71	1.27203e+06	2.07702e+06	0	49.59	10	-0.71	-0.782001	-3.68362	0.000114972	3222	0.000131254	TRUE	0.58156
3226	High	Master Protein	P31431	Syndecan-4 OS=Homo sapiens GN=SDC4 PE=1 SV=2	12.1212	2	3	2	1	198	High	High	0.621	-0.69	81504.6	131287	0	0	2	-0.69	-0.762001	-3.58965	0.000165561	3218	0.000162137	FALSE	0.589678
3227	High	Master Protein	Q9H0H5	Rac GTPase-activating protein 1 OS=Homo sapiens GN=RACGAP1 PE=1 SV=1	10.6013	6	7	6	1	632	High	High	0.618	-0.69	419085	677748	0	16.91	6	-0.69	-0.762001	-3.58965	0.000165561	3219	0.000154416	FALSE	0.589678
3228	High	Master Protein	Q15165	Serum paraoxonase/arylesterase 2 OS=Homo sapiens GN=PON2 PE=1 SV=3	7.62712	2	3	2	1	354	High	High	0.618	-0.69	5931.54	9592.78	0	3.97	2	-0.69	-0.762001	-3.58965	0.000165561	3220	0.000146695	FALSE	0.589678
3225	High	Master Protein	Q6RFH5	WD repeat-containing protein 74 OS=Homo sapiens GN=WDR74 PE=1 SV=1	9.35065	3	3	3	1	385	High	High	0.623	-0.68	230413	370080	0	6.74	3	-0.68	-0.752001	-3.54266	0.000198054	3217	0.000169858	FALSE	0.593779
3224	High	Master Protein	Q92783	Signal transducing adapter molecule 1 OS=Homo sapiens GN=STAM PE=1 SV=3	5.37037	2	2	2	1	540	High	High	0.631	-0.66	55175.3	87432.2	0	4.83	2	-0.66	-0.732001	-3.44869	0.000281654	3216	0.000177579	FALSE	0.602068
3223	High	Master Protein	P78536	Disintegrin and metalloproteinase domain-containing protein 17 OS=Homo sapiens GN=ADAM17 PE=1 SV=1	2.06311	3	4	3	1	824	High	High	0.64	-0.64	177586	277442	0	6.72	3	-0.64	-0.712001	-3.35472	0.000397226	3215	0.0001853	FALSE	0.610473
3222	High	Master Protein	Q9BZD4	Kinetochore protein Nuf2 OS=Homo sapiens GN=NUF2 PE=1 SV=2	5.60345	2	3	2	1	464	High	High	0.645	-0.63	39647.9	61503	0	2.18	2	-0.63	-0.702001	-3.30773	0.000470269	3214	0.00019302	FALSE	0.614719
3220	High	Master Protein	A4D1E9	GTP-binding protein 10 OS=Homo sapiens GN=GTPBP10 PE=1 SV=1	8.78553	3	3	3	1	387	High	High	0.656	-0.61	180037	274359	0	6.08	3	-0.61	-0.682001	-3.21376	0.000655039	3211	0.000216183	FALSE	0.6233
3221	High	Master Protein	P0DP23	Calmodulin-1 OS=Homo sapiens GN=CALM1 PE=1 SV=1	11.4094	3	6	3	1	149	High	High	0.656	-0.61	648645	988049	0	9.38	3	-0.61	-0.682001	-3.21376	0.000655039	3212	0.000208462	FALSE	0.6233
3216	High	Master Protein	P51809	Vesicle-associated membrane protein 7 OS=Homo sapiens GN=VAMP7 PE=1 SV=3	12.2727	2	3	2	1	220	High	High	0.664	-0.59	256087	385630	0	6.24	2	-0.59	-0.662001	-3.11979	0.000904896	3206	0.000254787	FALSE	0.632001
3217	High	Master Protein	Q13641	Trophoblast glycoprotein OS=Homo sapiens GN=TPBG PE=1 SV=1	5.2381	2	3	2	1	420	High	High	0.664	-0.59	265680	399978	0	7.96	2	-0.59	-0.662001	-3.11979	0.000904896	3207	0.000247066	FALSE	0.632001
3218	High	Master Protein	P17568	NADH dehydrogenase [ubiquinone] 1 beta subcomplex subunit 7 OS=Homo sapiens GN=NDUFB7 PE=1 SV=4	27.0073	4	13	4	1	137	High	High	0.663	-0.59	1.59548e+06	2.40816e+06	0	30.6	4	-0.59	-0.662001	-3.11979	0.000904896	3208	0.000239345	FALSE	0.632001
3219	High	Master Protein	Q9UII2	ATPase inhibitor, mitochondrial OS=Homo sapiens GN=ATPIF1 PE=1 SV=1	21.6981	4	7	4	1	106	High	High	0.662	-0.59	2.26586e+06	3.42207e+06	0	13.85	4	-0.59	-0.662001	-3.11979	0.000904896	3209	0.000231624	FALSE	0.632001
3215	High	Master Protein	P19256	Lymphocyte function-associated antigen 3 OS=Homo sapiens GN=CD58 PE=1 SV=1	8	3	14	3	1	250	High	High	0.671	-0.58	1.18249e+06	1.76193e+06	0	21.46	3	-0.58	-0.652001	-3.07281	0.00106028	3204	0.000270229	FALSE	0.636397
3213	High	Master Protein	P35613	Basigin OS=Homo sapiens GN=BSG PE=1 SV=2	12.7273	6	11	6	1	385	High	High	0.674	-0.57	1.95584e+06	2.89998e+06	0	19.36	6	-0.57	-0.642001	-3.02582	0.0012398	3202	0.00028567	FALSE	0.640823
3214	High	Master Protein	Q13277	Syntaxin-3 OS=Homo sapiens GN=STX3 PE=1 SV=3	7.61246	2	4	2	1	289	High	High	0.672	-0.57	188971	281268	0	7.49	2	-0.57	-0.642001	-3.02582	0.0012398	3203	0.000277949	FALSE	0.640823
3210	High	Master Protein	P01116	GTPase KRas OS=Homo sapiens GN=KRAS PE=1 SV=1	25.3968	4	8	3	1	189	High	High	0.68	-0.56	760305	1.11823e+06	0	19.36	4	-0.56	-0.632001	-2.97883	0.00144674	3198	0.000316553	FALSE	0.645281
3211	High	Master Protein	P30049	ATP synthase subunit delta, mitochondrial OS=Homo sapiens GN=ATP5D PE=1 SV=2	13.6905	2	16	2	1	168	High	High	0.679	-0.56	1.03496e+06	1.52354e+06	0	35.32	2	-0.56	-0.632001	-2.97883	0.00144674	3199	0.000308833	FALSE	0.645281
3212	High	Master Protein	O43181	NADH dehydrogenase [ubiquinone] iron-sulfur protein 4, mitochondrial OS=Homo sapiens GN=NDUFS4 PE=1 SV=1	26.2857	4	8	4	1	175	High	High	0.677	-0.56	428644	633532	0	15.17	4	-0.56	-0.632001	-2.97883	0.00144674	3200	0.000301112	FALSE	0.645281
3208	High	Master Protein	O00479	High mobility group nucleosome-binding domain-containing protein 4 OS=Homo sapiens GN=HMGN4 PE=1 SV=3	13.3333	2	2	2	1	90	High	High	0.684	-0.55	182959	267619	0	0	2	-0.55	-0.622001	-2.93185	0.00168476	3195	0.000339716	FALSE	0.649769
3209	High	Master Protein	Q05682	Caldesmon OS=Homo sapiens GN=CALD1 PE=1 SV=3	3.90921	2	3	2	1	793	High	High	0.682	-0.55	8731.32	12802.4	0	3.75	2	-0.55	-0.622001	-2.93185	0.00168476	3196	0.000331995	FALSE	0.649769
3205	High	Master Protein	P26447	Protein S100-A4 OS=Homo sapiens GN=S100A4 PE=1 SV=1	34.6535	5	12	5	1	101	High	High	0.688	-0.54	8.16537e+06	1.18598e+07	0	29.64	5	-0.54	-0.612001	-2.88486	0.00195793	3192	0.000362878	FALSE	0.654289
3206	High	Master Protein	P30048	Thioredoxin-dependent peroxide reductase, mitochondrial OS=Homo sapiens GN=PRDX3 PE=1 SV=3	49.6094	12	54	12	1	256	High	High	0.686	-0.54	1.66332e+07	2.42429e+07	0	163.04	12	-0.54	-0.612001	-2.88486	0.00195793	3193	0.000355158	FALSE	0.654289
3207	High	Master Protein	Q99584	Protein S100-A13 OS=Homo sapiens GN=S100A13 PE=1 SV=1	15.3061	2	4	2	1	98	High	High	0.686	-0.54	562316	819131	0	4.52	2	-0.54	-0.612001	-2.88486	0.00195793	3194	0.000347437	FALSE	0.654289
3203	High	Master Protein	P56556	NADH dehydrogenase [ubiquinone] 1 alpha subcomplex subunit 6 OS=Homo sapiens GN=NDUFA6 PE=1 SV=3	22.0779	4	10	4	1	154	High	High	0.695	-0.53	1.51869e+06	2.18541e+06	0	17.99	4	-0.53	-0.602001	-2.83788	0.00227074	3190	0.00037832	FALSE	0.658839
3204	High	Master Protein	P02765	Alpha-2-HS-glycoprotein OS=Homo sapiens GN=AHSG PE=1 SV=1	5.17711	2	3	2	1	367	High	High	0.692	-0.53	1.99568e+06	2.88527e+06	0	4.71	2	-0.53	-0.602001	-2.83788	0.00227074	3191	0.000370599	FALSE	0.658839
3202	High	Master Protein	Q9NVX2	Notchless protein homolog 1 OS=Homo sapiens GN=NLE1 PE=1 SV=4	7.21649	2	2	2	1	485	High	High	0.697	-0.52	27267.2	39101.3	0	0	2	-0.52	-0.592001	-2.79089	0.00262816	3188	0.000393762	FALSE	0.663422
3199	High	Master Protein	Q02318	Sterol 26-hydroxylase, mitochondrial OS=Homo sapiens GN=CYP27A1 PE=1 SV=1	2.82486	2	2	2	1	531	High	High	0.701	-0.51	12149.2	17334.4	0	4.63	2	-0.51	-0.582001	-2.7439	0.00303566	3183	0.000432366	FALSE	0.668037
3200	High	Master Protein	P09104	Gamma-enolase OS=Homo sapiens GN=ENO2 PE=1 SV=3	21.1982	7	15	3	1	434	High	High	0.7	-0.51	339405	484831	0	42.07	7	-0.51	-0.582001	-2.7439	0.00303566	3184	0.000424645	FALSE	0.668037
3201	High	Master Protein	Q7Z794	Keratin, type II cytoskeletal 1b OS=Homo sapiens GN=KRT77 PE=1 SV=3	9.68858	7	18	3	1	578	High	High	0.7	-0.51	90185.3	128753	0	57	7	-0.51	-0.582001	-2.7439	0.00303566	3185	0.000416924	FALSE	0.668037
3196	High	Master Protein	Q9BRT2	Ubiquinol-cytochrome-c reductase complex assembly factor 2 OS=Homo sapiens GN=UQCC2 PE=1 SV=1	28.5714	5	12	5	1	126	High	High	0.709	-0.5	517390	729273	0	17.47	5	-0.5	-0.572001	-2.69692	0.00349922	3178	0.00047097	FALSE	0.672683
3197	High	Master Protein	P09622	Dihydrolipoyl dehydrogenase, mitochondrial OS=Homo sapiens GN=DLD PE=1 SV=2	36.5422	19	63	19	1	509	High	High	0.708	-0.5	1.52589e+07	2.15619e+07	0	155.07	19	-0.5	-0.572001	-2.69692	0.00349922	3179	0.000463249	FALSE	0.672683
3198	High	Master Protein	O43291	Kunitz-type protease inhibitor 2 OS=Homo sapiens GN=SPINT2 PE=1 SV=2	11.9048	2	2	2	1	252	High	High	0.707	-0.5	193443	273444	0	5.04	2	-0.5	-0.572001	-2.69692	0.00349922	3180	0.000455528	FALSE	0.672683
3195	High	Master Protein	P00441	Superoxide dismutase [Cu-Zn] OS=Homo sapiens GN=SOD1 PE=1 SV=2	48.7013	8	14	8	1	154	High	High	0.712	-0.49	2.73273e+06	3.83558e+06	0	40.28	8	-0.49	-0.562001	-2.64993	0.00402539	3176	0.000486411	FALSE	0.677362
3191	High	Master Protein	P14854	Cytochrome c oxidase subunit 6B1 OS=Homo sapiens GN=COX6B1 PE=1 SV=2	24.4186	2	2	2	1	86	High	High	0.719	-0.48	87752.2	122038	0	2.98	2	-0.48	-0.552001	-2.60295	0.00462131	3171	0.000525015	FALSE	0.682073
3192	High	Master Protein	Q9BV40	Vesicle-associated membrane protein 8 OS=Homo sapiens GN=VAMP8 PE=1 SV=1	18	2	8	2	1	100	High	High	0.718	-0.48	215826	300570	0	19.87	2	-0.48	-0.552001	-2.60295	0.00462131	3172	0.000517295	FALSE	0.682073
3193	High	Master Protein	Q07021	Complement component 1 Q subcomponent-binding protein, mitochondrial OS=Homo sapiens GN=C1QBP PE=1 SV=1	34.0426	8	34	8	1	282	High	High	0.716	-0.48	1.96976e+06	2.74952e+06	0	100.06	8	-0.48	-0.552001	-2.60295	0.00462131	3173	0.000509574	FALSE	0.682073
3194	High	Master Protein	P08670	Vimentin OS=Homo sapiens GN=VIM PE=1 SV=4	61.3734	34	103	31	1	466	High	High	0.715	-0.48	1.06089e+07	1.48424e+07	0	252.9	34	-0.48	-0.552001	-2.60295	0.00462131	3174	0.000501853	FALSE	0.682073
3189	High	Master Protein	O96000	NADH dehydrogenase [ubiquinone] 1 beta subcomplex subunit 10 OS=Homo sapiens GN=NDUFB10 PE=1 SV=3	29.0698	6	17	6	1	172	High	High	0.723	-0.47	1.66073e+06	2.29542e+06	0	41.14	6	-0.47	-0.542001	-2.55596	0.00529475	3165	0.00057134	FALSE	0.686818
3190	High	Master Protein	Q9Y2B0	Protein canopy homolog 2 OS=Homo sapiens GN=CNPY2 PE=1 SV=1	26.3736	4	6	4	1	182	High	High	0.722	-0.47	589494	816364	0	7.45	4	-0.47	-0.542001	-2.55596	0.00529475	3166	0.00056362	FALSE	0.686818
3186	High	Master Protein	Q29974	HLA class II histocompatibility antigen, DRB1-16 beta chain OS=Homo sapiens GN=HLA-DRB1 PE=1 SV=1	14.6617	5	13	2	1	266	High	High	0.728	-0.46	980367	1.34732e+06	3	16.8	5	-0.46	-0.532001	-2.50898	0.0060541	3159	0.000617665	FALSE	0.691595
3187	High	Master Protein	Q08431	Lactadherin OS=Homo sapiens GN=MFGE8 PE=1 SV=2	48.8372	15	24	15	1	387	High	High	0.726	-0.46	4.09797e+06	5.64764e+06	0	75.12	15	-0.46	-0.532001	-2.50898	0.0060541	3160	0.000609944	FALSE	0.691595
3188	High	Master Protein	P62993	Growth factor receptor-bound protein 2 OS=Homo sapiens GN=GRB2 PE=1 SV=1	8.75576	2	3	2	1	217	High	High	0.726	-0.46	84409.6	116235	0	2.51	2	-0.46	-0.532001	-2.50898	0.0060541	3161	0.000602224	FALSE	0.691595
3182	High	Master Protein	P51970	NADH dehydrogenase [ubiquinone] 1 alpha subcomplex subunit 8 OS=Homo sapiens GN=NDUFA8 PE=1 SV=3	25	4	9	4	1	172	High	High	0.732	-0.45	1.67903e+06	2.29473e+06	0	14.77	4	-0.45	-0.522001	-2.46199	0.00690844	3149	0.000694873	FALSE	0.696405
3183	High	Master Protein	P04179	Superoxide dismutase [Mn], mitochondrial OS=Homo sapiens GN=SOD2 PE=1 SV=2	50	10	39	10	1	222	High	High	0.731	-0.45	8.04225e+06	1.1008e+07	0	125.12	10	-0.45	-0.522001	-2.46199	0.00690844	3150	0.000687153	FALSE	0.696405
3184	High	Master Protein	P06703	Protein S100-A6 OS=Homo sapiens GN=S100A6 PE=1 SV=1	33.3333	4	10	4	1	90	High	High	0.73	-0.45	9.92582e+06	1.35946e+07	0	16.96	4	-0.45	-0.522001	-2.46199	0.00690844	3151	0.000679432	FALSE	0.696405
3185	High	Master Protein	P06280	Alpha-galactosidase A OS=Homo sapiens GN=GLA PE=1 SV=1	8.39161	2	2	2	1	429	High	High	0.73	-0.45	7474.53	10243.7	0	6.3	2	-0.45	-0.522001	-2.46199	0.00690844	3152	0.000671711	FALSE	0.696405
3178	High	Master Protein	P62873	Guanine nucleotide-binding protein G(I)/G(S)/G(T) subunit beta-1 OS=Homo sapiens GN=GNB1 PE=1 SV=3	32.6471	9	35	5	1	340	High	High	0.739	-0.44	2.20364e+06	2.98348e+06	0	115.1	9	-0.44	-0.512001	-2.415	0.00786753	3143	0.000741198	FALSE	0.701249
3179	High	Master Protein	P10109	Adrenodoxin, mitochondrial OS=Homo sapiens GN=FDX1 PE=1 SV=1	14.1304	3	3	3	1	184	High	High	0.739	-0.44	338303	458080	0	6.62	3	-0.44	-0.512001	-2.415	0.00786753	3144	0.000733477	FALSE	0.701249
3180	High	Master Protein	O15427	Monocarboxylate transporter 4 OS=Homo sapiens GN=SLC16A3 PE=1 SV=1	14.1935	6	18	6	1	465	High	High	0.738	-0.44	3.48062e+06	4.71325e+06	0	45.6	6	-0.44	-0.512001	-2.415	0.00786753	3145	0.000725757	FALSE	0.701249
3181	High	Master Protein	Q13510	Acid ceramidase OS=Homo sapiens GN=ASAH1 PE=1 SV=5	11.1392	5	10	5	1	395	High	High	0.738	-0.44	165988	224806	0	20.81	5	-0.44	-0.512001	-2.415	0.00786753	3146	0.000718036	FALSE	0.701249
3175	High	Master Protein	P24752	Acetyl-CoA acetyltransferase, mitochondrial OS=Homo sapiens GN=ACAT1 PE=1 SV=1	60.6557	27	97	27	1	427	High	High	0.741	-0.43	1.64683e+07	2.22345e+07	0	258.11	27	-0.43	-0.502001	-2.36802	0.00894184	3137	0.000787523	FALSE	0.706127
3176	High	Master Protein	O15321	Transmembrane 9 superfamily member 1 OS=Homo sapiens GN=TM9SF1 PE=2 SV=2	4.78548	3	3	3	1	606	High	High	0.741	-0.43	25486.7	34380.6	0	4.46	3	-0.43	-0.502001	-2.36802	0.00894184	3138	0.000779802	FALSE	0.706127
3177	High	Master Protein	Q68CP4	Heparan-alpha-glucosaminide N-acetyltransferase OS=Homo sapiens GN=HGSNAT PE=1 SV=2	3.01659	2	2	2	1	663	High	High	0.74	-0.43	50045.2	67630.6	0	0	2	-0.43	-0.502001	-2.36802	0.00894184	3139	0.000772082	FALSE	0.706127
3168	High	Master Protein	P06733	Alpha-enolase OS=Homo sapiens GN=ENO1 PE=1 SV=2	76.9585	34	138	30	1	434	High	High	0.75	-0.42	3.45471e+07	4.60651e+07	4	426.6	34	-0.42	-0.492001	-2.32103	0.0101426	3125	0.000880173	FALSE	0.711038
3169	High	Master Protein	Q9NS25	Sperm protein associated with the nucleus on the X chromosome B1 OS=Homo sapiens GN=SPANXB1 PE=2 SV=2	52.4272	3	4	3	1	103	High	High	0.749	-0.42	132290	176730	0	7.4	3	-0.42	-0.492001	-2.32103	0.0101426	3126	0.000872452	FALSE	0.711038
3170	High	Master Protein	Q08623	Pseudouridine-5'-phosphatase OS=Homo sapiens GN=PUDP PE=1 SV=3	11.4035	2	2	2	1	228	High	High	0.749	-0.42	13820.2	18449.3	0	0	2	-0.42	-0.492001	-2.32103	0.0101426	3127	0.000864731	FALSE	0.711038
3171	High	Master Protein	O00483	Cytochrome c oxidase subunit NDUFA4 OS=Homo sapiens GN=NDUFA4 PE=1 SV=1	18.5185	2	2	2	1	81	High	High	0.749	-0.42	1.14716e+06	1.53131e+06	0	4.13	2	-0.42	-0.492001	-2.32103	0.0101426	3128	0.000857011	FALSE	0.711038
3172	High	Master Protein	P07919	Cytochrome b-c1 complex subunit 6, mitochondrial OS=Homo sapiens GN=UQCRH PE=1 SV=2	38.4615	4	7	4	1	91	High	High	0.748	-0.42	359613	480832	0	11.76	4	-0.42	-0.492001	-2.32103	0.0101426	3129	0.00084929	FALSE	0.711038
3173	High	Master Protein	Q9UNF0	Protein kinase C and casein kinase substrate in neurons protein 2 OS=Homo sapiens GN=PACSIN2 PE=1 SV=2	7.20165	4	4	4	1	486	High	High	0.747	-0.42	189042	253226	0	9.15	4	-0.42	-0.492001	-2.32103	0.0101426	3130	0.000841569	FALSE	0.711038
3174	High	Master Protein	O43676	NADH dehydrogenase [ubiquinone] 1 beta subcomplex subunit 3 OS=Homo sapiens GN=NDUFB3 PE=1 SV=3	22.449	3	7	3	1	98	High	High	0.747	-0.42	1.25824e+06	1.68465e+06	0	20.23	3	-0.42	-0.492001	-2.32103	0.0101426	3131	0.000833848	FALSE	0.711038
3163	High	Master Protein	P11279	Lysosome-associated membrane glycoprotein 1 OS=Homo sapiens GN=LAMP1 PE=1 SV=3	18.705	9	25	9	1	417	High	High	0.753	-0.41	1.13944e+07	1.51276e+07	0	78.68	9	-0.41	-0.482001	-2.27405	0.0114816	3116	0.00094966	FALSE	0.715984
3164	High	Master Protein	P60903	Protein S100-A10 OS=Homo sapiens GN=S100A10 PE=1 SV=2	42.268	6	24	6	1	97	High	High	0.753	-0.41	1.10204e+07	1.46366e+07	0	46.88	6	-0.41	-0.482001	-2.27405	0.0114816	3117	0.000941939	FALSE	0.715984
3165	High	Master Protein	Q9HB40	Retinoid-inducible serine carboxypeptidase OS=Homo sapiens GN=SCPEP1 PE=1 SV=1	4.86726	2	5	2	1	452	High	High	0.753	-0.41	234487	311607	0	7.28	2	-0.41	-0.482001	-2.27405	0.0114816	3118	0.000934219	FALSE	0.715984
3166	High	Master Protein	P01903	HLA class II histocompatibility antigen, DR alpha chain OS=Homo sapiens GN=HLA-DRA PE=1 SV=1	27.9528	7	23	7	1	254	High	High	0.751	-0.41	3.74688e+06	4.98593e+06	0	74.95	7	-0.41	-0.482001	-2.27405	0.0114816	3119	0.000926498	FALSE	0.715984
3167	High	Master Protein	Q330K2	NADH dehydrogenase (ubiquinone) complex I, assembly factor 6 OS=Homo sapiens GN=NDUFAF6 PE=1 SV=2	7.80781	2	2	2	1	333	High	High	0.751	-0.41	35009.3	46644.3	0	5.85	2	-0.41	-0.482001	-2.27405	0.0114816	3120	0.000918777	FALSE	0.715984
3156	High	Master Protein	P02769	Serum albumin OS=Bos taurus OX=9913 GN=ALB PE=1 SV=4	48.2702	29	65	29	1	607	High	High	0.76	-0.4	1.03049e+07	1.35602e+07	0	132.4	29	-0.4	-0.472001	-2.22706	0.0129716	3104	0.00104231	FALSE	0.720964
3157	High	Master Protein	P04075	Fructose-bisphosphate aldolase A OS=Homo sapiens GN=ALDOA PE=1 SV=2	62.9121	24	61	19	1	364	High	High	0.759	-0.4	1.65296e+07	2.17762e+07	5	158.95	24	-0.4	-0.472001	-2.22706	0.0129716	3105	0.00103459	FALSE	0.720964
3158	High	Master Protein	O43674	NADH dehydrogenase [ubiquinone] 1 beta subcomplex subunit 5, mitochondrial OS=Homo sapiens GN=NDUFB5 PE=1 SV=1	16.4021	4	8	4	1	189	High	High	0.758	-0.4	901165	1.1889e+06	0	20.84	4	-0.4	-0.472001	-2.22706	0.0129716	3106	0.00102687	FALSE	0.720964
3159	High	Master Protein	Q9NVA1	Ubiquinol-cytochrome-c reductase complex assembly factor 1 OS=Homo sapiens GN=UQCC1 PE=1 SV=3	13.3779	4	10	4	1	299	High	High	0.758	-0.4	911533	1.20227e+06	0	29.15	4	-0.4	-0.472001	-2.22706	0.0129716	3107	0.00101915	FALSE	0.720964
3160	High	Master Protein	Q5VZK9	F-actin-uncapping protein LRRC16A OS=Homo sapiens GN=CARMIL1 PE=1 SV=1	3.1364	4	5	4	1	1371	High	High	0.758	-0.4	434013	572804	0	6.95	4	-0.4	-0.472001	-2.22706	0.0129716	3108	0.00101143	FALSE	0.720964
3161	High	Master Protein	P30405	Peptidyl-prolyl cis-trans isomerase F, mitochondrial OS=Homo sapiens GN=PPIF PE=1 SV=1	33.3333	7	15	6	1	207	High	High	0.757	-0.4	3.87746e+06	5.1208e+06	0	27.42	7	-0.4	-0.472001	-2.22706	0.0129716	3109	0.00100371	FALSE	0.720964
3162	High	Master Protein	Q9UMX5	Neudesin OS=Homo sapiens GN=NENF PE=1 SV=1	11.6279	2	4	2	1	172	High	High	0.755	-0.4	102007	135020	0	4.53	2	-0.4	-0.472001	-2.22706	0.0129716	3110	0.000995985	FALSE	0.720964
3147	High	Master Protein	P01033	Metalloproteinase inhibitor 1 OS=Homo sapiens GN=TIMP1 PE=1 SV=1	10.1449	2	3	2	1	207	High	High	0.766	-0.39	199286	260318	0	3.78	2	-0.39	-0.462001	-2.18007	0.014626	3094	0.00111952	FALSE	0.725979
3151	High	Master Protein	Q9Y3B8	Oligoribonuclease, mitochondrial OS=Homo sapiens GN=REXO2 PE=1 SV=3	13.0802	3	3	3	1	237	High	High	0.764	-0.39	510720	668127	0	5.3	3	-0.39	-0.462001	-2.18007	0.014626	3095	0.0011118	FALSE	0.725979
3152	High	Master Protein	Q12959	Disks large homolog 1 OS=Homo sapiens GN=DLG1 PE=1 SV=2	9.84513	6	6	6	1	904	High	High	0.763	-0.39	253724	332479	0	16.09	6	-0.39	-0.462001	-2.18007	0.014626	3096	0.00110408	FALSE	0.725979
3153	High	Master Protein	O95298	NADH dehydrogenase [ubiquinone] 1 subunit C2 OS=Homo sapiens GN=NDUFC2 PE=1 SV=1	16.8067	3	8	3	1	119	High	High	0.763	-0.39	872659	1.14378e+06	0	20.1	3	-0.39	-0.462001	-2.18007	0.014626	3097	0.00109636	FALSE	0.725979
3154	High	Master Protein	P52758	2-iminobutanoate/2-iminopropanoate deaminase OS=Homo sapiens GN=RIDA PE=1 SV=1	25.5474	3	3	3	1	137	High	High	0.763	-0.39	941694	1.2337e+06	0	3.29	3	-0.39	-0.462001	-2.18007	0.014626	3098	0.00108863	FALSE	0.725979
3155	High	Master Protein	O43657	Tetraspanin-6 OS=Homo sapiens GN=TSPAN6 PE=1 SV=1	12.6531	3	8	3	1	245	High	High	0.761	-0.39	838012	1.10076e+06	0	16.96	3	-0.39	-0.462001	-2.18007	0.014626	3099	0.00108091	FALSE	0.725979
3142	High	Master Protein	P29966	Myristoylated alanine-rich C-kinase substrate OS=Homo sapiens GN=MARCKS PE=1 SV=4	17.1687	4	6	3	1	332	High	High	0.769	-0.38	345504	449351	1	5.03	4	-0.38	-0.452001	-2.13309	0.0164587	3084	0.00119673	FALSE	0.731028
3143	High	Master Protein	Q99757	Thioredoxin, mitochondrial OS=Homo sapiens GN=TXN2 PE=1 SV=2	13.253	2	2	2	1	166	High	High	0.769	-0.38	354000	460168	0	4.12	2	-0.38	-0.452001	-2.13309	0.0164587	3085	0.00118901	FALSE	0.731028
3144	High	Master Protein	P10809	60 kDa heat shock protein, mitochondrial OS=Homo sapiens GN=HSPD1 PE=1 SV=2	83.9442	60	530	60	1	573	High	High	0.768	-0.38	1.93788e+08	2.52363e+08	0	1674.76	60	-0.38	-0.452001	-2.13309	0.0164587	3086	0.00118128	FALSE	0.731028
3145	High	Master Protein	P40926	Malate dehydrogenase, mitochondrial OS=Homo sapiens GN=MDH2 PE=1 SV=3	58.8757	18	104	18	1	338	High	High	0.768	-0.38	3.0757e+07	4.0047e+07	0	321.01	18	-0.38	-0.452001	-2.13309	0.0164587	3087	0.00117356	FALSE	0.731028
3146	High	Master Protein	P02792	Ferritin light chain OS=Homo sapiens GN=FTL PE=1 SV=2	29.1429	5	7	5	1	175	High	High	0.766	-0.38	1.02324e+06	1.33615e+06	0	15.47	5	-0.38	-0.452001	-2.13309	0.0164587	3088	0.00116584	FALSE	0.731028
3148	High	Master Protein	Q99808	Equilibrative nucleoside transporter 1 OS=Homo sapiens GN=SLC29A1 PE=1 SV=3	5.48246	2	5	2	1	456	High	High	0.766	-0.38	203329	265289	0	6.66	2	-0.38	-0.452001	-2.13309	0.0164587	3089	0.00115812	FALSE	0.731028
3149	High	Master Protein	P03891	NADH-ubiquinone oxidoreductase chain 2 OS=Homo sapiens GN=MT-ND2 PE=1 SV=2	4.61095	2	6	2	1	347	High	High	0.766	-0.38	947729	1.23707e+06	0	14.23	2	-0.38	-0.452001	-2.13309	0.0164587	3090	0.0011504	FALSE	0.731028
3150	High	Master Protein	O14737	Programmed cell death protein 5 OS=Homo sapiens GN=PDCD5 PE=1 SV=3	20	2	3	2	1	125	High	High	0.766	-0.38	23253.3	30350.5	0	0	2	-0.38	-0.452001	-2.13309	0.0164587	3091	0.00114268	FALSE	0.731028
3136	High	Master Protein	Q9BW60	Elongation of very long chain fatty acids protein 1 OS=Homo sapiens GN=ELOVL1 PE=1 SV=1	12.5448	3	5	3	1	279	High	High	0.776	-0.37	123783	159454	0	10.19	3	-0.37	-0.442001	-2.0861	0.0184847	3069	0.00131254	FALSE	0.736113
3137	High	Master Protein	Q9H2H9	Sodium-coupled neutral amino acid transporter 1 OS=Homo sapiens GN=SLC38A1 PE=1 SV=1	4.72279	3	4	3	1	487	High	High	0.775	-0.37	273762	353310	0	5.33	3	-0.37	-0.442001	-2.0861	0.0184847	3070	0.00130482	FALSE	0.736113
3138	High	Master Protein	O95831	Apoptosis-inducing factor 1, mitochondrial OS=Homo sapiens GN=AIFM1 PE=1 SV=1	32.9527	17	46	17	1	613	High	High	0.774	-0.37	3.71457e+06	4.79853e+06	0	122.25	17	-0.37	-0.442001	-2.0861	0.0184847	3071	0.0012971	FALSE	0.736113
3139	High	Master Protein	Q9P0J0	NADH dehydrogenase [ubiquinone] 1 alpha subcomplex subunit 13 OS=Homo sapiens GN=NDUFA13 PE=1 SV=3	33.3333	6	11	6	1	144	High	High	0.773	-0.37	751827	972308	0	23.48	6	-0.37	-0.442001	-2.0861	0.0184847	3072	0.00128938	FALSE	0.736113
3140	High	Master Protein	O95182	NADH dehydrogenase [ubiquinone] 1 alpha subcomplex subunit 7 OS=Homo sapiens GN=NDUFA7 PE=1 SV=3	34.5133	5	5	5	1	113	High	High	0.772	-0.37	505293	654451	0	8.56	5	-0.37	-0.442001	-2.0861	0.0184847	3073	0.00128166	FALSE	0.736113
3141	High	Master Protein	P09525	Annexin A4 OS=Homo sapiens GN=ANXA4 PE=1 SV=4	45.1411	16	38	15	1	319	High	High	0.771	-0.37	2.08185e+06	2.69948e+06	0	66.83	16	-0.37	-0.442001	-2.0861	0.0184847	3074	0.00127393	FALSE	0.736113
3125	High	Master Protein	P19367	Hexokinase-1 OS=Homo sapiens GN=HK1 PE=1 SV=3	45.6925	42	137	38	1	917	High	High	0.78	-0.36	2.69317e+07	3.45195e+07	4	356.22	42	-0.36	-0.432001	-2.03912	0.0207192	3051	0.00145151	FALSE	0.741233
3126	High	Master Protein	Q9Y287	Integral membrane protein 2B OS=Homo sapiens GN=ITM2B PE=1 SV=1	21.8045	5	8	5	1	266	High	High	0.78	-0.36	242247	310550	0	16.13	5	-0.36	-0.432001	-2.03912	0.0207192	3052	0.00144379	FALSE	0.741233
3127	High	Master Protein	P28331	NADH-ubiquinone oxidoreductase 75 kDa subunit, mitochondrial OS=Homo sapiens GN=NDUFS1 PE=1 SV=3	38.7895	23	39	23	1	727	High	High	0.779	-0.36	4.07687e+06	5.23048e+06	0	104.17	23	-0.36	-0.432001	-2.03912	0.0207192	3053	0.00143607	FALSE	0.741233
3128	High	Master Protein	Q03405	Urokinase plasminogen activator surface receptor OS=Homo sapiens GN=PLAUR PE=1 SV=1	15.5224	3	8	3	1	335	High	High	0.779	-0.36	58592.7	75245.8	0	6.82	3	-0.36	-0.432001	-2.03912	0.0207192	3054	0.00142835	FALSE	0.741233
3129	High	Master Protein	P09497	Clathrin light chain B OS=Homo sapiens GN=CLTB PE=1 SV=1	6.9869	2	2	2	1	229	High	High	0.779	-0.36	66580.6	85503.1	0	1.61	2	-0.36	-0.432001	-2.03912	0.0207192	3055	0.00142063	FALSE	0.741233
3130	High	Master Protein	P00367	Glutamate dehydrogenase 1, mitochondrial OS=Homo sapiens GN=GLUD1 PE=1 SV=2	45.8781	25	125	25	1	558	High	High	0.778	-0.36	2.70615e+07	3.47948e+07	0	352.9	25	-0.36	-0.432001	-2.03912	0.0207192	3056	0.00141291	FALSE	0.741233
3131	High	Master Protein	Q9NTX5	Ethylmalonyl-CoA decarboxylase OS=Homo sapiens GN=ECHDC1 PE=1 SV=2	28.9902	7	11	7	1	307	High	High	0.778	-0.36	410939	528263	0	22.09	7	-0.36	-0.432001	-2.03912	0.0207192	3057	0.00140519	FALSE	0.741233
3132	High	Master Protein	Q8IV08	Phospholipase D3 OS=Homo sapiens GN=PLD3 PE=1 SV=1	10.4082	6	9	6	1	490	High	High	0.778	-0.36	2.27427e+06	2.9215e+06	0	26.03	6	-0.36	-0.432001	-2.03912	0.0207192	3058	0.00139747	FALSE	0.741233
3133	High	Master Protein	P21926	CD9 antigen OS=Homo sapiens GN=CD9 PE=1 SV=4	12.2807	5	13	5	1	228	High	High	0.778	-0.36	2.38073e+06	3.06169e+06	0	27.37	5	-0.36	-0.432001	-2.03912	0.0207192	3059	0.00138975	FALSE	0.741233
3134	High	Master Protein	Q86UY8	5'-nucleotidase domain-containing protein 3 OS=Homo sapiens GN=NT5DC3 PE=1 SV=1	18.4307	11	20	11	1	548	High	High	0.777	-0.36	4.7854e+06	6.15509e+06	0	49.27	11	-0.36	-0.432001	-2.03912	0.0207192	3060	0.00138203	FALSE	0.741233
3135	High	Master Protein	O00764	Pyridoxal kinase OS=Homo sapiens GN=PDXK PE=1 SV=1	14.7436	3	5	3	1	312	High	High	0.777	-0.36	190539	245236	0	16.66	3	-0.36	-0.432001	-2.03912	0.0207192	3061	0.00137431	FALSE	0.741233
3120	High	Master Protein	Q13442	28 kDa heat- and acid-stable phosphoprotein OS=Homo sapiens GN=PDAP1 PE=1 SV=1	12.7072	2	3	2	1	181	High	High	0.786	-0.35	80469.5	102409	0	7.25	2	-0.35	-0.422001	-1.99213	0.0231783	3039	0.00154416	FALSE	0.746389
3121	High	Master Protein	P53041	Serine/threonine-protein phosphatase 5 OS=Homo sapiens GN=PPP5C PE=1 SV=1	4.80962	2	2	2	1	499	High	High	0.786	-0.35	4014.56	5107.37	0	0	2	-0.35	-0.422001	-1.99213	0.0231783	3040	0.00153644	FALSE	0.746389
3122	High	Master Protein	P07355	Annexin A2 OS=Homo sapiens GN=ANXA2 PE=1 SV=2	67.5516	32	232	32	1	339	High	High	0.785	-0.35	1.3432e+08	1.71176e+08	0	556.09	32	-0.35	-0.422001	-1.99213	0.0231783	3041	0.00152872	FALSE	0.746389
3123	High	Master Protein	Q9UHN1	DNA polymerase subunit gamma-2, mitochondrial OS=Homo sapiens GN=POLG2 PE=1 SV=1	4.94845	2	2	2	1	485	High	High	0.784	-0.35	62915.3	80248	0	4.93	2	-0.35	-0.422001	-1.99213	0.0231783	3042	0.001521	FALSE	0.746389
3124	High	Master Protein	P98173	Protein FAM3A OS=Homo sapiens GN=FAM3A PE=1 SV=2	12.6087	2	2	2	1	230	High	High	0.782	-0.35	16656.6	21299.5	0	0	2	-0.35	-0.422001	-1.99213	0.0231783	3043	0.00151328	FALSE	0.746389
3114	High	Master Protein	P61604	10 kDa heat shock protein, mitochondrial OS=Homo sapiens GN=HSPE1 PE=1 SV=2	93.1373	15	75	15	1	102	High	High	0.792	-0.34	4.05167e+07	5.11831e+07	0	182.97	15	-0.34	-0.412001	-1.94515	0.0258788	3023	0.0016677	FALSE	0.75158
3115	High	Master Protein	P37802	Transgelin-2 OS=Homo sapiens GN=TAGLN2 PE=1 SV=3	74.3719	12	27	12	1	199	High	High	0.791	-0.34	4.00616e+06	5.06247e+06	0	68.47	12	-0.34	-0.412001	-1.94515	0.0258788	3024	0.00165998	FALSE	0.75158
3116	High	Master Protein	P06753	Tropomyosin alpha-3 chain OS=Homo sapiens GN=TPM3 PE=1 SV=2	40.7018	19	42	5	1	285	High	High	0.789	-0.34	1.48767e+06	1.88439e+06	2	76.79	19	-0.34	-0.412001	-1.94515	0.0258788	3025	0.00165225	FALSE	0.75158
3117	High	Master Protein	O75880	Protein SCO1 homolog, mitochondrial OS=Homo sapiens GN=SCO1 PE=1 SV=1	5.31561	2	2	2	1	301	High	High	0.789	-0.34	63945	81059.1	0	4.75	2	-0.34	-0.412001	-1.94515	0.0258788	3026	0.00164453	FALSE	0.75158
3118	High	Master Protein	P51690	Arylsulfatase E OS=Homo sapiens GN=ARSE PE=1 SV=2	3.56537	2	3	2	1	589	High	High	0.788	-0.34	147933	187627	0	4.16	2	-0.34	-0.412001	-1.94515	0.0258788	3027	0.00163681	FALSE	0.75158
3119	High	Master Protein	O60637	Tetraspanin-3 OS=Homo sapiens GN=TSPAN3 PE=2 SV=1	3.55731	2	3	2	1	253	High	High	0.788	-0.34	1.02167e+06	1.2971e+06	0	4.71	2	-0.34	-0.412001	-1.94515	0.0258788	3028	0.00162909	FALSE	0.75158
3103	High	Master Protein	Q8NC42	E3 ubiquitin-protein ligase RNF149 OS=Homo sapiens GN=RNF149 PE=2 SV=2	15.25	4	8	4	1	400	High	High	0.798	-0.33	278957	349542	0	28.34	4	-0.33	-0.402001	-1.89816	0.0288376	3004	0.00181439	FALSE	0.756808
3104	High	Master Protein	Q9P0V9	Septin-10 OS=Homo sapiens GN=SEPT10 PE=1 SV=2	14.7577	5	10	4	1	454	High	High	0.798	-0.33	199723	250188	0	18.66	5	-0.33	-0.402001	-1.89816	0.0288376	3005	0.00180667	FALSE	0.756808
3105	High	Master Protein	Q8NFJ5	Retinoic acid-induced protein 3 OS=Homo sapiens GN=GPRC5A PE=1 SV=2	10.3641	3	6	3	1	357	High	High	0.798	-0.33	532849	668098	0	16.69	3	-0.33	-0.402001	-1.89816	0.0288376	3006	0.00179895	FALSE	0.756808
3106	High	Master Protein	O95139	NADH dehydrogenase [ubiquinone] 1 beta subcomplex subunit 6 OS=Homo sapiens GN=NDUFB6 PE=1 SV=3	33.5938	5	18	5	1	128	High	High	0.797	-0.33	953370	1.19585e+06	0	46.22	5	-0.33	-0.402001	-1.89816	0.0288376	3007	0.00179123	FALSE	0.756808
3107	High	Master Protein	Q8IXM3	39S ribosomal protein L41, mitochondrial OS=Homo sapiens GN=MRPL41 PE=1 SV=1	21.1679	3	3	3	1	137	High	High	0.797	-0.33	84595.7	106092	0	4.7	3	-0.33	-0.402001	-1.89816	0.0288376	3008	0.00178351	FALSE	0.756808
3108	High	Master Protein	Q68CQ7	Glycosyltransferase 8 domain-containing protein 1 OS=Homo sapiens GN=GLT8D1 PE=1 SV=2	9.7035	2	2	2	1	371	High	High	0.797	-0.33	5789.28	7266.45	0	0	2	-0.33	-0.402001	-1.89816	0.0288376	3009	0.00177579	FALSE	0.756808
3109	High	Master Protein	P26038	Moesin OS=Homo sapiens GN=MSN PE=1 SV=3	52.6863	44	100	33	1	577	High	High	0.796	-0.33	2.3755e+07	2.98351e+07	13	185.64	44	-0.33	-0.402001	-1.89816	0.0288376	3010	0.00176807	FALSE	0.756808
3110	High	Master Protein	Q93045	Stathmin-2 OS=Homo sapiens GN=STMN2 PE=1 SV=3	15.0838	4	5	3	1	179	High	High	0.796	-0.33	535924	673040	0	7.18	4	-0.33	-0.402001	-1.89816	0.0288376	3011	0.00176035	FALSE	0.756808
3111	High	Master Protein	P67936	Tropomyosin alpha-4 chain OS=Homo sapiens GN=TPM4 PE=1 SV=3	67.3387	30	69	18	1	248	High	High	0.795	-0.33	7.2683e+06	9.13781e+06	12	125.46	30	-0.33	-0.402001	-1.89816	0.0288376	3012	0.00175263	FALSE	0.756808
3112	High	Master Protein	O14950	Myosin regulatory light chain 12B OS=Homo sapiens GN=MYL12B PE=1 SV=2	70.3488	11	51	4	1	172	High	High	0.794	-0.33	7.69708e+06	9.69725e+06	9	111.53	11	-0.33	-0.402001	-1.89816	0.0288376	3013	0.0017449	FALSE	0.756808
3113	High	Master Protein	P04156	Major prion protein OS=Homo sapiens GN=PRNP PE=1 SV=1	12.253	3	6	3	1	253	High	High	0.794	-0.33	462762	582685	0	10.52	3	-0.33	-0.402001	-1.89816	0.0288376	3014	0.00173718	FALSE	0.756808
3096	High	Master Protein	P29728	2'-5'-oligoadenylate synthase 2 OS=Homo sapiens GN=OAS2 PE=1 SV=3	8.48401	5	5	5	1	719	High	High	0.804	-0.32	375005	466540	0	10.71	5	-0.32	-0.392001	-1.85117	0.0320723	2986	0.00195337	FALSE	0.762072
3097	High	Master Protein	Q9BUL8	Programmed cell death protein 10 OS=Homo sapiens GN=PDCD10 PE=1 SV=1	10.8491	2	2	2	1	212	High	High	0.804	-0.32	153501	190960	0	2.39	2	-0.32	-0.392001	-1.85117	0.0320723	2987	0.00194565	FALSE	0.762072
3098	High	Master Protein	P06454	Prothymosin alpha OS=Homo sapiens GN=PTMA PE=1 SV=2	21.6216	2	2	2	1	111	High	High	0.802	-0.32	58375.6	72785.7	0	4.69	2	-0.32	-0.392001	-1.85117	0.0320723	2988	0.00193792	FALSE	0.762072
3099	High	Master Protein	P08758	Annexin A5 OS=Homo sapiens GN=ANXA5 PE=1 SV=2	67.5	26	76	25	1	320	High	High	0.801	-0.32	2.68916e+07	3.35708e+07	1	177.84	26	-0.32	-0.392001	-1.85117	0.0320723	2989	0.0019302	FALSE	0.762072
3100	High	Master Protein	O43663	Protein regulator of cytokinesis 1 OS=Homo sapiens GN=PRC1 PE=1 SV=2	9.35484	6	6	5	1	620	High	High	0.801	-0.32	149388	186612	0	8.16	6	-0.32	-0.392001	-1.85117	0.0320723	2990	0.00192248	FALSE	0.762072
3101	High	Master Protein	P22392	Nucleoside diphosphate kinase B OS=Homo sapiens GN=NME2 PE=1 SV=1	59.2105	9	33	4	1	152	High	High	0.8	-0.32	1.29738e+07	1.62074e+07	6	77.1	9	-0.32	-0.392001	-1.85117	0.0320723	2991	0.00191476	FALSE	0.762072
3102	High	Master Protein	Q14156	Protein EFR3 homolog A OS=Homo sapiens GN=EFR3A PE=1 SV=2	4.7503	3	3	3	1	821	High	High	0.8	-0.32	3653.85	4567.18	0	2.55	3	-0.32	-0.392001	-1.85117	0.0320723	2992	0.00190704	FALSE	0.762072
3085	High	Master Protein	Q8TB37	Iron-sulfur protein NUBPL OS=Homo sapiens GN=NUBPL PE=1 SV=3	11.5987	3	3	3	1	319	High	High	0.809	-0.31	7175.76	8873.63	0	6.5	3	-0.31	-0.382001	-1.80419	0.035601	2963	0.00213095	FALSE	0.767372
3086	High	Master Protein	O15162	Phospholipid scramblase 1 OS=Homo sapiens GN=PLSCR1 PE=1 SV=1	9.43396	2	3	2	1	318	High	High	0.809	-0.31	96586.8	119444	0	7.49	2	-0.31	-0.382001	-1.80419	0.035601	2964	0.00212322	FALSE	0.767372
3087	High	Master Protein	P10599	Thioredoxin OS=Homo sapiens GN=TXN PE=1 SV=3	40	6	17	6	1	105	High	High	0.808	-0.31	5.39728e+06	6.67959e+06	0	37.04	6	-0.31	-0.382001	-1.80419	0.035601	2965	0.0021155	FALSE	0.767372
3088	High	Master Protein	Q9UJZ1	Stomatin-like protein 2, mitochondrial OS=Homo sapiens GN=STOML2 PE=1 SV=1	37.9213	16	53	16	1	356	High	High	0.807	-0.31	5.22263e+06	6.47096e+06	0	173.57	16	-0.31	-0.382001	-1.80419	0.035601	2966	0.00210778	FALSE	0.767372
3089	High	Master Protein	P00403	Cytochrome c oxidase subunit 2 OS=Homo sapiens GN=MT-CO2 PE=1 SV=1	30.837	7	22	7	1	227	High	High	0.807	-0.31	7.10912e+06	8.8094e+06	0	66.19	7	-0.31	-0.382001	-1.80419	0.035601	2967	0.00210006	FALSE	0.767372
3090	High	Master Protein	Q08257	Quinone oxidoreductase OS=Homo sapiens GN=CRYZ PE=1 SV=1	23.1003	7	12	7	1	329	High	High	0.807	-0.31	1.06921e+06	1.32516e+06	0	26.8	7	-0.31	-0.382001	-1.80419	0.035601	2968	0.00209234	FALSE	0.767372
3091	High	Master Protein	Q9NX14	NADH dehydrogenase [ubiquinone] 1 beta subcomplex subunit 11, mitochondrial OS=Homo sapiens GN=NDUFB11 PE=1 SV=1	15.6863	2	4	2	1	153	High	High	0.807	-0.31	118745	147169	0	5.46	2	-0.31	-0.382001	-1.80419	0.035601	2969	0.00208462	FALSE	0.767372
3092	High	Master Protein	Q68D91	Metallo-beta-lactamase domain-containing protein 2 OS=Homo sapiens GN=MBLAC2 PE=1 SV=3	10.0358	2	2	2	1	279	High	High	0.807	-0.31	74259	91974.6	0	5.91	2	-0.31	-0.382001	-1.80419	0.035601	2970	0.0020769	FALSE	0.767372
3093	High	Master Protein	P08582	Melanotransferrin OS=Homo sapiens GN=MELTF PE=1 SV=2	21.9512	15	26	15	1	738	High	High	0.805	-0.31	3.66767e+06	4.55512e+06	0	71.64	15	-0.31	-0.382001	-1.80419	0.035601	2971	0.00206918	FALSE	0.767372
3094	High	Master Protein	Q9H6K4	Optic atrophy 3 protein OS=Homo sapiens GN=OPA3 PE=1 SV=1	24.581	3	4	3	1	179	High	High	0.805	-0.31	178789	222130	0	2.46	3	-0.31	-0.382001	-1.80419	0.035601	2972	0.00206146	FALSE	0.767372
3095	High	Master Protein	Q96J02	E3 ubiquitin-protein ligase Itchy homolog OS=Homo sapiens GN=ITCH PE=1 SV=2	2.76855	3	4	2	1	903	High	High	0.805	-0.31	78079.5	96992	0	4.64	3	-0.31	-0.382001	-1.80419	0.035601	2973	0.00205374	FALSE	0.767372
3071	High	Master Protein	P49821	NADH dehydrogenase [ubiquinone] flavoprotein 1, mitochondrial OS=Homo sapiens GN=NDUFV1 PE=1 SV=4	31.4655	12	28	12	1	464	High	High	0.815	-0.3	2.83134e+06	3.47387e+06	0	65.82	12	-0.3	-0.372001	-1.7572	0.0394417	2936	0.00233941	FALSE	0.77271
3075	High	Master Protein	Q99536	Synaptic vesicle membrane protein VAT-1 homolog OS=Homo sapiens GN=VAT1 PE=1 SV=2	33.8422	9	31	9	1	393	High	High	0.814	-0.3	2.83094e+06	3.4791e+06	0	93.23	9	-0.3	-0.372001	-1.7572	0.0394417	2937	0.00233169	FALSE	0.77271
3076	High	Master Protein	P15531	Nucleoside diphosphate kinase A OS=Homo sapiens GN=NME1 PE=1 SV=1	48.6842	8	28	3	1	152	High	High	0.814	-0.3	625335	767868	0	58.63	8	-0.3	-0.372001	-1.7572	0.0394417	2938	0.00232397	FALSE	0.77271
3077	High	Master Protein	P06576	ATP synthase subunit beta, mitochondrial OS=Homo sapiens GN=ATP5B PE=1 SV=3	65.2174	26	143	26	1	529	High	High	0.813	-0.3	3.38046e+07	4.15578e+07	0	426.34	26	-0.3	-0.372001	-1.7572	0.0394417	2939	0.00231624	FALSE	0.77271
3078	High	Master Protein	P61916	Epididymal secretory protein E1 OS=Homo sapiens GN=NPC2 PE=1 SV=1	38.4106	5	14	5	1	151	High	High	0.813	-0.3	1.35807e+06	1.67062e+06	0	41.25	5	-0.3	-0.372001	-1.7572	0.0394417	2940	0.00230852	FALSE	0.77271
3079	High	Master Protein	Q13287	N-myc-interactor OS=Homo sapiens GN=NMI PE=1 SV=2	10.0977	2	4	2	1	307	High	High	0.813	-0.3	151273	185955	0	7.8	2	-0.3	-0.372001	-1.7572	0.0394417	2941	0.0023008	FALSE	0.77271
3080	High	Master Protein	Q8NBN3	Transmembrane protein 87A OS=Homo sapiens GN=TMEM87A PE=1 SV=3	7.02703	2	2	2	1	555	High	High	0.813	-0.3	37770.5	46457.8	0	7.54	2	-0.3	-0.372001	-1.7572	0.0394417	2942	0.00229308	FALSE	0.77271
3081	High	Master Protein	P40925	Malate dehydrogenase, cytoplasmic OS=Homo sapiens GN=MDH1 PE=1 SV=4	33.8323	9	14	9	1	334	High	High	0.812	-0.3	1.65952e+06	2.04274e+06	0	40.18	9	-0.3	-0.372001	-1.7572	0.0394417	2943	0.00228536	FALSE	0.77271
3082	High	Master Protein	P61457	Pterin-4-alpha-carbinolamine dehydratase OS=Homo sapiens GN=PCBD1 PE=1 SV=2	16.3462	2	2	2	1	104	High	High	0.811	-0.3	408956	504059	0	2.89	2	-0.3	-0.372001	-1.7572	0.0394417	2944	0.00227764	FALSE	0.77271
3083	High	Master Protein	Q99816	Tumor susceptibility gene 101 protein OS=Homo sapiens GN=TSG101 PE=1 SV=2	6.41026	3	3	3	1	390	High	High	0.81	-0.3	204941	252945	0	2.21	3	-0.3	-0.372001	-1.7572	0.0394417	2945	0.00226992	FALSE	0.77271
3084	High	Master Protein	Q15041	ADP-ribosylation factor-like protein 6-interacting protein 1 OS=Homo sapiens GN=ARL6IP1 PE=1 SV=2	6.89655	2	3	2	1	203	High	High	0.81	-0.3	2.5281e+06	3.11947e+06	0	4.16	2	-0.3	-0.372001	-1.7572	0.0394417	2946	0.0022622	FALSE	0.77271
3053	High	Master Protein	O94925	Glutaminase kidney isoform, mitochondrial OS=Homo sapiens GN=GLS PE=1 SV=1	13.6024	9	13	9	1	669	High	High	0.82	-0.29	795345	969725	0	34.49	9	-0.29	-0.362001	-1.71022	0.043613	2904	0.00258647	FALSE	0.778085
3054	High	Master Protein	Q9NRA2	Sialin OS=Homo sapiens GN=SLC17A5 PE=1 SV=2	6.86869	3	4	3	1	495	High	High	0.82	-0.29	418754	510625	0	6.34	3	-0.29	-0.362001	-1.71022	0.043613	2905	0.00257875	FALSE	0.778085
3055	High	Master Protein	Q86Y39	NADH dehydrogenase [ubiquinone] 1 alpha subcomplex subunit 11 OS=Homo sapiens GN=NDUFA11 PE=1 SV=3	34.7518	3	4	3	1	141	High	High	0.82	-0.29	809109	986582	0	12	3	-0.29	-0.362001	-1.71022	0.043613	2906	0.00257103	FALSE	0.778085
3056	High	Master Protein	O60507	Protein-tyrosine sulfotransferase 1 OS=Homo sapiens GN=TPST1 PE=2 SV=1	7.56757	2	2	2	1	370	High	High	0.82	-0.29	22691	27677.9	0	4.02	2	-0.29	-0.362001	-1.71022	0.043613	2907	0.00256331	FALSE	0.778085
3057	High	Master Protein	P04083	Annexin A1 OS=Homo sapiens GN=ANXA1 PE=1 SV=2	66.763	26	112	26	1	346	High	High	0.819	-0.29	3.93061e+07	4.80078e+07	0	284.97	26	-0.29	-0.362001	-1.71022	0.043613	2908	0.00255559	FALSE	0.778085
3058	High	Master Protein	Q8N884	Cyclic GMP-AMP synthase OS=Homo sapiens GN=MB21D1 PE=1 SV=2	11.6858	5	6	5	1	522	High	High	0.819	-0.29	196494	239974	0	10.2	5	-0.29	-0.362001	-1.71022	0.043613	2909	0.00254787	FALSE	0.778085
3059	High	Master Protein	Q9H074	Polyadenylate-binding protein-interacting protein 1 OS=Homo sapiens GN=PAIP1 PE=1 SV=1	8.97704	3	4	3	1	479	High	High	0.819	-0.29	212182	259180	0	11.43	3	-0.29	-0.362001	-1.71022	0.043613	2910	0.00254015	FALSE	0.778085
3060	High	Master Protein	Q9BT40	Inositol polyphosphate 5-phosphatase K OS=Homo sapiens GN=INPP5K PE=1 SV=3	4.6875	2	3	2	1	448	High	High	0.819	-0.29	51681.3	63113.4	0	7.43	2	-0.29	-0.362001	-1.71022	0.043613	2911	0.00253243	FALSE	0.778085
3061	High	Master Protein	P42126	Enoyl-CoA delta isomerase 1, mitochondrial OS=Homo sapiens GN=ECI1 PE=1 SV=1	31.7881	7	13	7	1	302	High	High	0.818	-0.29	1.60523e+06	1.96277e+06	0	41.47	7	-0.29	-0.362001	-1.71022	0.043613	2912	0.00252471	FALSE	0.778085
3062	High	Master Protein	Q92673	Sortilin-related receptor OS=Homo sapiens GN=SORL1 PE=1 SV=2	0.948509	2	2	2	1	2214	High	High	0.818	-0.29	80571.1	98511.1	0	1.75	2	-0.29	-0.362001	-1.71022	0.043613	2913	0.00251699	FALSE	0.778085
3063	High	Master Protein	P07339	Cathepsin D OS=Homo sapiens GN=CTSD PE=1 SV=1	50.7282	17	109	17	1	412	High	High	0.817	-0.29	1.93513e+07	2.36871e+07	0	296.06	17	-0.29	-0.362001	-1.71022	0.043613	2914	0.00250926	FALSE	0.778085
3064	High	Master Protein	P14927	Cytochrome b-c1 complex subunit 7 OS=Homo sapiens GN=UQCRB PE=1 SV=2	63.964	11	25	11	1	111	High	High	0.817	-0.29	5.17402e+06	6.33194e+06	0	42.11	11	-0.29	-0.362001	-1.71022	0.043613	2915	0.00250154	FALSE	0.778085
3065	High	Master Protein	Q9Y680	Peptidyl-prolyl cis-trans isomerase FKBP7 OS=Homo sapiens GN=FKBP7 PE=1 SV=1	6.17761	2	2	2	1	259	High	High	0.817	-0.29	110994	135793	0	4.45	2	-0.29	-0.362001	-1.71022	0.043613	2916	0.00249382	FALSE	0.778085
3066	High	Master Protein	P54709	Sodium/potassium-transporting ATPase subunit beta-3 OS=Homo sapiens GN=ATP1B3 PE=1 SV=1	14.3369	4	11	4	1	279	High	High	0.816	-0.29	3.65958e+06	4.48354e+06	0	14.9	4	-0.29	-0.362001	-1.71022	0.043613	2917	0.0024861	FALSE	0.778085
3067	High	Master Protein	Q99471	Prefoldin subunit 5 OS=Homo sapiens GN=PFDN5 PE=1 SV=2	14.9351	3	5	3	1	154	High	High	0.816	-0.29	701402	859613	0	9.53	3	-0.29	-0.362001	-1.71022	0.043613	2918	0.00247838	FALSE	0.778085
3068	High	Master Protein	O14548	Cytochrome c oxidase subunit 7A-related protein, mitochondrial OS=Homo sapiens GN=COX7A2L PE=1 SV=2	14.9123	2	3	2	1	114	High	High	0.816	-0.29	1.65041e+06	2.02198e+06	0	4.96	2	-0.29	-0.362001	-1.71022	0.043613	2919	0.00247066	FALSE	0.778085
3069	High	Master Protein	P18206	Vinculin OS=Homo sapiens GN=VCL PE=1 SV=4	48.1481	53	93	53	1	1134	High	High	0.815	-0.29	1.01796e+07	1.24827e+07	0	200.08	53	-0.29	-0.362001	-1.71022	0.043613	2920	0.00246294	FALSE	0.778085
3070	High	Master Protein	P07195	L-lactate dehydrogenase B chain OS=Homo sapiens GN=LDHB PE=1 SV=2	43.7126	16	47	14	1	334	High	High	0.815	-0.29	6.92045e+06	8.48722e+06	0	118.24	16	-0.29	-0.362001	-1.71022	0.043613	2921	0.00245522	FALSE	0.778085
3072	High	Master Protein	Q86VP1	Tax1-binding protein 1 OS=Homo sapiens GN=TAX1BP1 PE=1 SV=2	10.8999	10	15	10	1	789	High	High	0.815	-0.29	1.33245e+06	1.63415e+06	0	17.63	10	-0.29	-0.362001	-1.71022	0.043613	2922	0.0024475	FALSE	0.778085
3073	High	Master Protein	Q9Y5K8	V-type proton ATPase subunit D OS=Homo sapiens GN=ATP6V1D PE=1 SV=1	8.50202	2	2	2	1	247	High	High	0.815	-0.29	24093.1	29554	0	3.65	2	-0.29	-0.362001	-1.71022	0.043613	2923	0.00243978	FALSE	0.778085
3074	High	Master Protein	Q8IY95	Transmembrane protein 192 OS=Homo sapiens GN=TMEM192 PE=1 SV=1	8.48708	2	3	2	1	271	High	High	0.815	-0.29	165900	203471	0	5.75	2	-0.29	-0.362001	-1.71022	0.043613	2924	0.00243206	FALSE	0.778085
3036	High	Master Protein	Q15075	Early endosome antigen 1 OS=Homo sapiens GN=EEA1 PE=1 SV=2	20.0567	27	34	27	1	1411	High	High	0.825	-0.28	1.86347e+06	2.25845e+06	0	63.2	27	-0.28	-0.352001	-1.66323	0.0481332	2879	0.00277949	FALSE	0.783497
3037	High	Master Protein	Q13772	Nuclear receptor coactivator 4 OS=Homo sapiens GN=NCOA4 PE=1 SV=1	3.90879	2	3	2	1	614	High	High	0.825	-0.28	108483	131424	0	2.63	2	-0.28	-0.352001	-1.66323	0.0481332	2880	0.00277177	FALSE	0.783497
3038	High	Master Protein	Q16563	Synaptophysin-like protein 1 OS=Homo sapiens GN=SYPL1 PE=1 SV=1	20.8494	5	22	5	1	259	High	High	0.824	-0.28	4.28214e+06	5.1972e+06	0	67.67	5	-0.28	-0.352001	-1.66323	0.0481332	2881	0.00276405	FALSE	0.783497
3039	High	Master Protein	P27816	Microtubule-associated protein 4 OS=Homo sapiens GN=MAP4 PE=1 SV=3	1.82292	2	2	2	1	1152	High	High	0.824	-0.28	180956	219495	0	1.97	2	-0.28	-0.352001	-1.66323	0.0481332	2882	0.00275633	FALSE	0.783497
3040	High	Master Protein	Q9BQC6	Ribosomal protein 63, mitochondrial OS=Homo sapiens GN=MRPL57 PE=1 SV=1	19.6078	2	4	2	1	102	High	High	0.824	-0.28	430956	522799	0	5.62	2	-0.28	-0.352001	-1.66323	0.0481332	2883	0.00274861	FALSE	0.783497
3041	High	Master Protein	Q16854	Deoxyguanosine kinase, mitochondrial OS=Homo sapiens GN=DGUOK PE=1 SV=2	5.77617	2	3	2	1	277	High	High	0.824	-0.28	696675	845395	0	7.28	2	-0.28	-0.352001	-1.66323	0.0481332	2884	0.00274089	FALSE	0.783497
3042	High	Master Protein	P83111	Serine beta-lactamase-like protein LACTB, mitochondrial OS=Homo sapiens GN=LACTB PE=1 SV=2	22.1207	10	16	10	1	547	High	High	0.823	-0.28	2.01551e+06	2.44932e+06	0	32.16	10	-0.28	-0.352001	-1.66323	0.0481332	2885	0.00273317	FALSE	0.783497
3043	High	Master Protein	P08962	CD63 antigen OS=Homo sapiens GN=CD63 PE=1 SV=2	21.8487	7	19	7	1	238	High	High	0.823	-0.28	4.64014e+06	5.64111e+06	0	48.32	7	-0.28	-0.352001	-1.66323	0.0481332	2886	0.00272545	FALSE	0.783497
3044	High	Master Protein	Q9Y281	Cofilin-2 OS=Homo sapiens GN=CFL2 PE=1 SV=1	46.3855	7	21	3	1	166	High	High	0.823	-0.28	166828	202771	0	51.26	7	-0.28	-0.352001	-1.66323	0.0481332	2887	0.00271773	FALSE	0.783497
3045	High	Master Protein	Q2T9J0	Peroxisomal leader peptide-processing protease OS=Homo sapiens GN=TYSND1 PE=1 SV=3	6.89046	3	3	3	1	566	High	High	0.823	-0.28	32869.1	39921.6	0	3.03	3	-0.28	-0.352001	-1.66323	0.0481332	2888	0.00271001	FALSE	0.783497
3046	High	Master Protein	P02545	Prelamin-A/C OS=Homo sapiens GN=LMNA PE=1 SV=1	49.0964	46	130	44	1	664	High	High	0.822	-0.28	1.83202e+07	2.22934e+07	2	273.17	46	-0.28	-0.352001	-1.66323	0.0481332	2889	0.00270229	FALSE	0.783497
3047	High	Master Protein	Q9UIJ7	GTP:AMP phosphotransferase AK3, mitochondrial OS=Homo sapiens GN=AK3 PE=1 SV=4	26.8722	6	9	6	1	227	High	High	0.822	-0.28	714680	869700	0	15.92	6	-0.28	-0.352001	-1.66323	0.0481332	2890	0.00269456	FALSE	0.783497
3048	High	Master Protein	Q9Y2R0	Cytochrome c oxidase assembly factor 3 homolog, mitochondrial OS=Homo sapiens GN=COA3 PE=1 SV=1	26.4151	3	5	3	1	106	High	High	0.822	-0.28	507756	617784	0	6.38	3	-0.28	-0.352001	-1.66323	0.0481332	2891	0.00268684	FALSE	0.783497
3049	High	Master Protein	O14880	Microsomal glutathione S-transferase 3 OS=Homo sapiens GN=MGST3 PE=1 SV=1	13.8158	2	7	2	1	152	High	High	0.822	-0.28	3.5793e+06	4.35192e+06	0	14.97	2	-0.28	-0.352001	-1.66323	0.0481332	2892	0.00267912	FALSE	0.783497
3050	High	Master Protein	P00558	Phosphoglycerate kinase 1 OS=Homo sapiens GN=PGK1 PE=1 SV=3	69.5444	31	96	31	1	417	High	High	0.821	-0.28	1.8296e+07	2.22778e+07	0	273.45	31	-0.28	-0.352001	-1.66323	0.0481332	2893	0.0026714	FALSE	0.783497
3051	High	Master Protein	Q06830	Peroxiredoxin-1 OS=Homo sapiens GN=PRDX1 PE=1 SV=1	63.3166	15	45	11	1	199	High	High	0.821	-0.28	1.52472e+07	1.85742e+07	4	123.24	15	-0.28	-0.352001	-1.66323	0.0481332	2894	0.00266368	FALSE	0.783497
3052	High	Master Protein	O43678	NADH dehydrogenase [ubiquinone] 1 alpha subcomplex subunit 2 OS=Homo sapiens GN=NDUFA2 PE=1 SV=3	50.5051	6	13	6	1	99	High	High	0.821	-0.28	1.37224e+06	1.67195e+06	0	25.41	6	-0.28	-0.352001	-1.66323	0.0481332	2895	0.00265596	FALSE	0.783497
3021	High	Master Protein	Q16795	NADH dehydrogenase [ubiquinone] 1 alpha subcomplex subunit 9, mitochondrial OS=Homo sapiens GN=NDUFA9 PE=1 SV=2	34.4828	12	29	12	1	377	High	High	0.832	-0.27	4.35839e+06	5.23863e+06	0	84.26	12	-0.27	-0.342001	-1.61624	0.0530208	2852	0.00298796	FALSE	0.788946
3022	High	Master Protein	Q56VL3	OCIA domain-containing protein 2 OS=Homo sapiens GN=OCIAD2 PE=1 SV=1	48.0519	8	42	8	1	154	High	High	0.831	-0.27	6.85769e+06	8.25002e+06	0	114.25	8	-0.27	-0.342001	-1.61624	0.0530208	2853	0.00298023	FALSE	0.788946
3023	High	Master Protein	P67812	Signal peptidase complex catalytic subunit SEC11A OS=Homo sapiens GN=SEC11A PE=1 SV=1	29.0503	8	12	8	1	179	High	High	0.831	-0.27	2.73391e+06	3.2918e+06	0	28.99	8	-0.27	-0.342001	-1.61624	0.0530208	2854	0.00297251	FALSE	0.788946
3024	High	Master Protein	Q9NY33	Dipeptidyl peptidase 3 OS=Homo sapiens GN=DPP3 PE=1 SV=2	10.3121	5	7	5	1	737	High	High	0.831	-0.27	470996	566783	0	17.12	5	-0.27	-0.342001	-1.61624	0.0530208	2855	0.00296479	FALSE	0.788946
3025	High	Master Protein	P18669	Phosphoglycerate mutase 1 OS=Homo sapiens GN=PGAM1 PE=1 SV=2	27.9528	8	24	8	1	254	High	High	0.83	-0.27	4.90877e+06	5.91372e+06	0	60.41	8	-0.27	-0.342001	-1.61624	0.0530208	2856	0.00295707	FALSE	0.788946
3026	High	Master Protein	O95881	Thioredoxin domain-containing protein 12 OS=Homo sapiens GN=TXNDC12 PE=1 SV=1	22.6744	3	5	3	1	172	High	High	0.83	-0.27	593100	714181	0	13.43	3	-0.27	-0.342001	-1.61624	0.0530208	2857	0.00294935	FALSE	0.788946
3027	High	Master Protein	Q8NFF5	FAD synthase OS=Homo sapiens GN=FLAD1 PE=1 SV=1	6.13288	2	2	2	1	587	High	High	0.83	-0.27	21042.7	25362.5	0	3.45	2	-0.27	-0.342001	-1.61624	0.0530208	2858	0.00294163	FALSE	0.788946
3028	High	Master Protein	Q86UT6	NLR family member X1 OS=Homo sapiens GN=NLRX1 PE=1 SV=1	5.4359	5	6	5	1	975	High	High	0.829	-0.27	306425	369500	0	9.39	5	-0.27	-0.342001	-1.61624	0.0530208	2859	0.00293391	FALSE	0.788946
3029	High	Master Protein	P31946	14-3-3 protein beta/alpha OS=Homo sapiens GN=YWHAB PE=1 SV=3	47.561	10	32	4	1	246	High	High	0.829	-0.27	246180	296997	0	65.23	10	-0.27	-0.342001	-1.61624	0.0530208	2860	0.00292619	FALSE	0.788946
3030	High	Master Protein	Q9NRX5	Serine incorporator 1 OS=Homo sapiens GN=SERINC1 PE=1 SV=1	11.6998	5	7	4	1	453	High	High	0.829	-0.27	389652	469909	0	9.49	5	-0.27	-0.342001	-1.61624	0.0530208	2861	0.00291847	FALSE	0.788946
3031	High	Master Protein	P00338	L-lactate dehydrogenase A chain OS=Homo sapiens GN=LDHA PE=1 SV=2	62.6506	20	67	18	1	332	High	High	0.828	-0.27	1.05472e+07	1.27447e+07	1	179.89	20	-0.27	-0.342001	-1.61624	0.0530208	2862	0.00291075	FALSE	0.788946
3032	High	Master Protein	P30536	Translocator protein OS=Homo sapiens GN=TSPO PE=1 SV=3	9.46746	2	16	2	1	169	High	High	0.828	-0.27	6.96684e+06	8.41247e+06	0	41.53	2	-0.27	-0.342001	-1.61624	0.0530208	2863	0.00290303	FALSE	0.788946
3033	High	Master Protein	Q5JPH6	Probable glutamate--tRNA ligase, mitochondrial OS=Homo sapiens GN=EARS2 PE=1 SV=2	6.69216	3	3	3	1	523	High	High	0.827	-0.27	181639	219644	0	6.28	3	-0.27	-0.342001	-1.61624	0.0530208	2864	0.00289531	FALSE	0.788946
3034	High	Master Protein	Q9Y6M4	Casein kinase I isoform gamma-3 OS=Homo sapiens GN=CSNK1G3 PE=1 SV=2	7.15884	3	4	3	1	447	High	High	0.826	-0.27	257202	311207	0	8.45	3	-0.27	-0.342001	-1.61624	0.0530208	2865	0.00288758	FALSE	0.788946
3035	High	Master Protein	P52815	39S ribosomal protein L12, mitochondrial OS=Homo sapiens GN=MRPL12 PE=1 SV=2	11.6162	2	5	2	1	198	High	High	0.826	-0.27	62580.6	75721.7	0	8.08	2	-0.27	-0.342001	-1.61624	0.0530208	2866	0.00287986	FALSE	0.788946
3009	High	Master Protein	P07602	Prosaposin OS=Homo sapiens GN=PSAP PE=1 SV=2	34.542	17	40	17	1	524	High	High	0.838	-0.26	3.11425e+06	3.71791e+06	0	107.49	17	-0.26	-0.332001	-1.56926	0.0582939	2825	0.00319642	FALSE	0.794434
3012	High	Master Protein	Q9H3P2	Negative elongation factor A OS=Homo sapiens GN=NELFA PE=1 SV=3	4.54545	2	2	2	1	528	High	High	0.838	-0.26	104106	124293	0	3.42	2	-0.26	-0.332001	-1.56926	0.0582939	2826	0.0031887	FALSE	0.794434
3013	High	Master Protein	P16422	Epithelial cell adhesion molecule OS=Homo sapiens GN=EPCAM PE=1 SV=2	12.7389	3	4	3	1	314	High	High	0.836	-0.26	194891	233008	0	5.85	3	-0.26	-0.332001	-1.56926	0.0582939	2827	0.00318098	FALSE	0.794434
3014	High	Master Protein	O75340	Programmed cell death protein 6 OS=Homo sapiens GN=PDCD6 PE=1 SV=1	13.089	2	3	2	1	191	High	High	0.836	-0.26	421181	503991	0	9.22	2	-0.26	-0.332001	-1.56926	0.0582939	2828	0.00317326	FALSE	0.794434
3015	High	Master Protein	Q9C0H2	Protein tweety homolog 3 OS=Homo sapiens GN=TTYH3 PE=1 SV=3	8.79541	4	5	4	1	523	High	High	0.835	-0.26	380756	456028	0	11.57	4	-0.26	-0.332001	-1.56926	0.0582939	2829	0.00316553	FALSE	0.794434
3016	High	Master Protein	Q92734	Protein TFG OS=Homo sapiens GN=TFG PE=1 SV=2	6.25	3	8	3	1	400	High	High	0.835	-0.26	595726	713519	0	14.93	3	-0.26	-0.332001	-1.56926	0.0582939	2830	0.00315781	FALSE	0.794434
3017	High	Master Protein	Q9C002	Normal mucosa of esophagus-specific gene 1 protein OS=Homo sapiens GN=NMES1 PE=2 SV=1	42.1687	3	5	3	1	83	High	High	0.835	-0.26	243598	291686	0	16.58	3	-0.26	-0.332001	-1.56926	0.0582939	2831	0.00315009	FALSE	0.794434
3018	High	Master Protein	Q9H3K2	Growth hormone-inducible transmembrane protein OS=Homo sapiens GN=GHITM PE=1 SV=2	6.08696	2	6	2	1	345	High	High	0.835	-0.26	231995	277832	0	12.01	2	-0.26	-0.332001	-1.56926	0.0582939	2832	0.00314237	FALSE	0.794434
3019	High	Master Protein	Q86UP2	Kinectin OS=Homo sapiens GN=KTN1 PE=1 SV=1	17.0228	20	24	20	1	1357	High	High	0.834	-0.26	1.56743e+06	1.88001e+06	0	61.12	20	-0.26	-0.332001	-1.56926	0.0582939	2833	0.00313465	FALSE	0.794434
3020	High	Master Protein	O15118	Niemann-Pick C1 protein OS=Homo sapiens GN=NPC1 PE=1 SV=2	4.61659	6	9	6	1	1278	High	High	0.833	-0.26	1.41506e+06	1.69793e+06	0	18.91	6	-0.26	-0.332001	-1.56926	0.0582939	2834	0.00312693	FALSE	0.794434
2997	High	Master Protein	P08174	Complement decay-accelerating factor OS=Homo sapiens GN=CD55 PE=1 SV=4	14.1732	6	13	6	1	381	High	High	0.843	-0.25	2.43591e+06	2.89102e+06	0	22.24	6	-0.25	-0.322001	-1.52227	0.0639704	2791	0.00345893	FALSE	0.79996
2998	High	Master Protein	P30044	Peroxiredoxin-5, mitochondrial OS=Homo sapiens GN=PRDX5 PE=1 SV=4	55.6075	9	33	9	1	214	High	High	0.842	-0.25	4.12828e+06	4.90146e+06	0	103.2	9	-0.25	-0.322001	-1.52227	0.0639704	2792	0.0034512	FALSE	0.79996
2999	High	Master Protein	O95168	NADH dehydrogenase [ubiquinone] 1 beta subcomplex subunit 4 OS=Homo sapiens GN=NDUFB4 PE=1 SV=3	41.0853	4	7	4	1	129	High	High	0.842	-0.25	1.46566e+06	1.73977e+06	0	13.22	4	-0.25	-0.322001	-1.52227	0.0639704	2793	0.00344348	FALSE	0.79996
3000	High	Master Protein	O00560	Syntenin-1 OS=Homo sapiens GN=SDCBP PE=1 SV=1	25.1678	4	7	4	1	298	High	High	0.842	-0.25	854138	1.01462e+06	0	30.36	4	-0.25	-0.322001	-1.52227	0.0639704	2794	0.00343576	FALSE	0.79996
3001	High	Master Protein	O15344	E3 ubiquitin-protein ligase Midline-1 OS=Homo sapiens GN=MID1 PE=1 SV=1	4.7976	3	3	3	1	667	High	High	0.842	-0.25	66686.8	79201.5	0	4.94	3	-0.25	-0.322001	-1.52227	0.0639704	2795	0.00342804	FALSE	0.79996
3002	High	Master Protein	P12814	Alpha-actinin-1 OS=Homo sapiens GN=ACTN1 PE=1 SV=2	41.704	32	80	19	1	892	High	High	0.841	-0.25	3.11448e+06	3.70242e+06	0	213.18	32	-0.25	-0.322001	-1.52227	0.0639704	2796	0.00342032	FALSE	0.79996
3003	High	Master Protein	Q9UL46	Proteasome activator complex subunit 2 OS=Homo sapiens GN=PSME2 PE=1 SV=4	23.8494	5	11	5	1	239	High	High	0.841	-0.25	944241	1.12259e+06	0	27.23	5	-0.25	-0.322001	-1.52227	0.0639704	2797	0.0034126	FALSE	0.79996
3004	High	Master Protein	Q08722	Leukocyte surface antigen CD47 OS=Homo sapiens GN=CD47 PE=1 SV=1	8.66873	3	11	3	1	323	High	High	0.841	-0.25	3.02009e+06	3.59144e+06	0	25.36	3	-0.25	-0.322001	-1.52227	0.0639704	2798	0.00340488	FALSE	0.79996
3005	High	Master Protein	P60033	CD81 antigen OS=Homo sapiens GN=CD81 PE=1 SV=1	14.4068	3	10	3	1	236	High	High	0.841	-0.25	1.65854e+06	1.97143e+06	0	23.51	3	-0.25	-0.322001	-1.52227	0.0639704	2799	0.00339716	FALSE	0.79996
3006	High	Master Protein	P00505	Aspartate aminotransferase, mitochondrial OS=Homo sapiens GN=GOT2 PE=1 SV=3	39.7674	19	47	19	1	430	High	High	0.84	-0.25	1.38217e+07	1.64595e+07	0	129.73	19	-0.25	-0.322001	-1.52227	0.0639704	2800	0.00338944	FALSE	0.79996
3007	High	Master Protein	Q9Y4D7	Plexin-D1 OS=Homo sapiens GN=PLXND1 PE=1 SV=3	1.45455	2	2	2	1	1925	High	High	0.84	-0.25	7807.02	9298.99	0	3.39	2	-0.25	-0.322001	-1.52227	0.0639704	2801	0.00338172	FALSE	0.79996
3008	High	Master Protein	Q8N129	Protein canopy homolog 4 OS=Homo sapiens GN=CNPY4 PE=2 SV=1	5.64516	2	2	2	1	248	High	High	0.84	-0.25	100659	119849	0	5.55	2	-0.25	-0.322001	-1.52227	0.0639704	2802	0.003374	FALSE	0.79996
3010	High	Master Protein	Q06323	Proteasome activator complex subunit 1 OS=Homo sapiens GN=PSME1 PE=1 SV=1	23.6948	5	6	5	1	249	High	High	0.838	-0.25	412400	492027	0	18.81	5	-0.25	-0.322001	-1.52227	0.0639704	2803	0.00336628	FALSE	0.79996
3011	High	Master Protein	P14406	Cytochrome c oxidase subunit 7A2, mitochondrial OS=Homo sapiens GN=COX7A2 PE=1 SV=1	27.7108	2	4	2	1	83	High	High	0.838	-0.25	234895	280306	0	7.77	2	-0.25	-0.322001	-1.52227	0.0639704	2804	0.00335855	FALSE	0.79996
2977	High	Master Protein	O75955	Flotillin-1 OS=Homo sapiens GN=FLOT1 PE=1 SV=3	49.1803	22	44	22	1	427	High	High	0.849	-0.24	5.98994e+06	7.05283e+06	0	105.03	22	-0.24	-0.312001	-1.47529	0.0700678	2749	0.0037832	FALSE	0.805524
2978	High	Master Protein	Q9HAB3	Solute carrier family 52, riboflavin transporter, member 2 OS=Homo sapiens GN=SLC52A2 PE=1 SV=1	2.69663	2	2	2	1	445	High	High	0.849	-0.24	647497	763067	0	3.96	2	-0.24	-0.312001	-1.47529	0.0700678	2750	0.00377548	FALSE	0.805524
2979	High	Master Protein	Q9BTX3	Transmembrane protein 208 OS=Homo sapiens GN=TMEM208 PE=1 SV=1	6.35838	2	3	2	1	173	High	High	0.849	-0.24	440384	518488	0	4.33	2	-0.24	-0.312001	-1.47529	0.0700678	2751	0.00376776	FALSE	0.805524
2980	High	Master Protein	Q9ULV4	Coronin-1C OS=Homo sapiens GN=CORO1C PE=1 SV=1	20.6751	10	15	10	1	474	High	High	0.848	-0.24	3.05924e+06	3.60645e+06	0	34.89	10	-0.24	-0.312001	-1.47529	0.0700678	2752	0.00376004	FALSE	0.805524
2981	High	Master Protein	P23284	Peptidyl-prolyl cis-trans isomerase B OS=Homo sapiens GN=PPIB PE=1 SV=2	61.1111	18	73	18	1	216	High	High	0.847	-0.24	3.58742e+07	4.23672e+07	0	186.14	18	-0.24	-0.312001	-1.47529	0.0700678	2753	0.00375232	FALSE	0.805524
2982	High	Master Protein	P42765	3-ketoacyl-CoA thiolase, mitochondrial OS=Homo sapiens GN=ACAA2 PE=1 SV=2	51.6373	16	33	16	1	397	High	High	0.847	-0.24	9.68851e+06	1.14416e+07	0	96.99	16	-0.24	-0.312001	-1.47529	0.0700678	2754	0.0037446	FALSE	0.805524
2983	High	Master Protein	Q9HC38	Glyoxalase domain-containing protein 4 OS=Homo sapiens GN=GLOD4 PE=1 SV=1	27.476	9	13	9	1	313	High	High	0.847	-0.24	1.17629e+06	1.38911e+06	0	23.01	9	-0.24	-0.312001	-1.47529	0.0700678	2755	0.00373687	FALSE	0.805524
2984	High	Master Protein	P21397	Amine oxidase [flavin-containing] A OS=Homo sapiens GN=MAOA PE=1 SV=1	20.1139	10	13	8	1	527	High	High	0.847	-0.24	1.70391e+06	2.01125e+06	2	27.59	10	-0.24	-0.312001	-1.47529	0.0700678	2756	0.00372915	FALSE	0.805524
2985	High	Master Protein	P11233	Ras-related protein Ral-A OS=Homo sapiens GN=RALA PE=1 SV=1	32.5243	6	20	4	1	206	High	High	0.847	-0.24	1.28929e+06	1.52137e+06	0	38.59	6	-0.24	-0.312001	-1.47529	0.0700678	2757	0.00372143	FALSE	0.805524
2986	High	Master Protein	P39687	Acidic leucine-rich nuclear phosphoprotein 32 family member A OS=Homo sapiens GN=ANP32A PE=1 SV=1	10.8434	4	6	2	1	249	High	High	0.847	-0.24	152236	179810	0	8.65	4	-0.24	-0.312001	-1.47529	0.0700678	2758	0.00371371	FALSE	0.805524
2987	High	Master Protein	P49006	MARCKS-related protein OS=Homo sapiens GN=MARCKSL1 PE=1 SV=2	19.4872	3	4	2	1	195	High	High	0.847	-0.24	137017	161755	0	11.04	3	-0.24	-0.312001	-1.47529	0.0700678	2759	0.00370599	FALSE	0.805524
2988	High	Master Protein	Q08345	Epithelial discoidin domain-containing receptor 1 OS=Homo sapiens GN=DDR1 PE=1 SV=1	3.3954	2	3	2	1	913	High	High	0.847	-0.24	18400.8	21733.7	0	1.93	2	-0.24	-0.312001	-1.47529	0.0700678	2760	0.00369827	FALSE	0.805524
2989	High	Master Protein	P80303	Nucleobindin-2 OS=Homo sapiens GN=NUCB2 PE=1 SV=2	26.1905	10	22	9	1	420	High	High	0.846	-0.24	1.7999e+06	2.1269e+06	0	41.34	10	-0.24	-0.312001	-1.47529	0.0700678	2761	0.00369055	FALSE	0.805524
2990	High	Master Protein	P15121	Aldose reductase OS=Homo sapiens GN=AKR1B1 PE=1 SV=3	25.6329	9	13	8	1	316	High	High	0.846	-0.24	2.96164e+06	3.4992e+06	1	32.05	9	-0.24	-0.312001	-1.47529	0.0700678	2762	0.00368283	FALSE	0.805524
2991	High	Master Protein	Q9Y376	Calcium-binding protein 39 OS=Homo sapiens GN=CAB39 PE=1 SV=1	22.5806	8	12	8	1	341	High	High	0.846	-0.24	762541	901539	0	22	8	-0.24	-0.312001	-1.47529	0.0700678	2763	0.00367511	FALSE	0.805524
2992	High	Master Protein	P49590	Probable histidine--tRNA ligase, mitochondrial OS=Homo sapiens GN=HARS2 PE=1 SV=1	11.8577	6	11	3	1	506	High	High	0.846	-0.24	469441	554977	0	28.02	6	-0.24	-0.312001	-1.47529	0.0700678	2764	0.00366739	FALSE	0.805524
2993	High	Master Protein	Q5JXB2	Putative ubiquitin-conjugating enzyme E2 N-like OS=Homo sapiens GN=UBE2NL PE=1 SV=1	13.7255	2	3	2	1	153	High	High	0.846	-0.24	575103	679895	0	10.58	2	-0.24	-0.312001	-1.47529	0.0700678	2765	0.00365967	FALSE	0.805524
2994	High	Master Protein	P13473	Lysosome-associated membrane glycoprotein 2 OS=Homo sapiens GN=LAMP2 PE=1 SV=2	15.3659	6	18	6	1	410	High	High	0.844	-0.24	4.2801e+06	5.06943e+06	0	42.99	6	-0.24	-0.312001	-1.47529	0.0700678	2766	0.00365195	FALSE	0.805524
2995	High	Master Protein	P10586	Receptor-type tyrosine-protein phosphatase F OS=Homo sapiens GN=PTPRF PE=1 SV=2	1.94022	2	3	2	1	1907	High	High	0.844	-0.24	11219.8	13286.6	0	2.22	2	-0.24	-0.312001	-1.47529	0.0700678	2767	0.00364422	FALSE	0.805524
2996	High	Master Protein	Q01105	Protein SET OS=Homo sapiens GN=SET PE=1 SV=3	7.24138	2	3	2	1	290	High	High	0.844	-0.24	195602	231801	0	5.21	2	-0.24	-0.312001	-1.47529	0.0700678	2768	0.0036365	FALSE	0.805524
2955	High	Master Protein	Q13423	NAD(P) transhydrogenase, mitochondrial OS=Homo sapiens GN=NNT PE=1 SV=3	38.674	42	120	42	1	1086	High	High	0.855	-0.23	3.35751e+07	3.92469e+07	0	321.19	42	-0.23	-0.302001	-1.4283	0.0766027	2707	0.00410747	FALSE	0.811127
2956	High	Master Protein	O43707	Alpha-actinin-4 OS=Homo sapiens GN=ACTN4 PE=1 SV=2	51.921	45	125	32	1	911	High	High	0.855	-0.23	1.94893e+07	2.27836e+07	13	355.25	45	-0.23	-0.302001	-1.4283	0.0766027	2708	0.00409975	FALSE	0.811127
2957	High	Master Protein	P36957	Dihydrolipoyllysine-residue succinyltransferase component of 2-oxoglutarate dehydrogenase complex, mitochondrial OS=Homo sapiens GN=DLST PE=1 SV=4	37.0861	16	59	16	1	453	High	High	0.855	-0.23	9.45318e+06	1.10556e+07	0	146.7	16	-0.23	-0.302001	-1.4283	0.0766027	2709	0.00409203	FALSE	0.811127
2958	High	Master Protein	O75947	ATP synthase subunit d, mitochondrial OS=Homo sapiens GN=ATP5H PE=1 SV=3	69.5652	10	31	10	1	161	High	High	0.855	-0.23	5.66076e+06	6.61784e+06	0	70.72	10	-0.23	-0.302001	-1.4283	0.0766027	2710	0.00408431	FALSE	0.811127
2959	High	Master Protein	Q16836	Hydroxyacyl-coenzyme A dehydrogenase, mitochondrial OS=Homo sapiens GN=HADH PE=1 SV=3	29.6178	10	31	10	1	314	High	High	0.855	-0.23	7.91727e+06	9.2553e+06	0	64.51	10	-0.23	-0.302001	-1.4283	0.0766027	2711	0.00407659	FALSE	0.811127
2960	High	Master Protein	P27701	CD82 antigen OS=Homo sapiens GN=CD82 PE=1 SV=1	14.9813	4	9	4	1	267	High	High	0.855	-0.23	659198	770646	0	17.28	4	-0.23	-0.302001	-1.4283	0.0766027	2712	0.00406887	FALSE	0.811127
2961	High	Master Protein	Q9UKU7	Isobutyryl-CoA dehydrogenase, mitochondrial OS=Homo sapiens GN=ACAD8 PE=1 SV=1	8.43373	3	7	3	1	415	High	High	0.854	-0.23	562603	658697	0	16.29	3	-0.23	-0.302001	-1.4283	0.0766027	2713	0.00406115	FALSE	0.811127
2962	High	Master Protein	O75368	SH3 domain-binding glutamic acid-rich-like protein OS=Homo sapiens GN=SH3BGRL PE=1 SV=1	21.9298	2	6	2	1	114	High	High	0.854	-0.23	139250	163032	0	3.8	2	-0.23	-0.302001	-1.4283	0.0766027	2714	0.00405343	FALSE	0.811127
2963	High	Master Protein	P48637	Glutathione synthetase OS=Homo sapiens GN=GSS PE=1 SV=1	24.6835	11	18	11	1	474	High	High	0.853	-0.23	2.47626e+06	2.90225e+06	0	29.99	11	-0.23	-0.302001	-1.4283	0.0766027	2715	0.00404571	FALSE	0.811127
2964	High	Master Protein	P63010	AP-2 complex subunit beta OS=Homo sapiens GN=AP2B1 PE=1 SV=1	21.0245	20	32	9	1	937	High	High	0.853	-0.23	2.7517e+06	3.22589e+06	9	68.72	20	-0.23	-0.302001	-1.4283	0.0766027	2716	0.00403799	FALSE	0.811127
2965	High	Master Protein	Q8WTV0	Scavenger receptor class B member 1 OS=Homo sapiens GN=SCARB1 PE=1 SV=1	5.61594	3	3	3	1	552	High	High	0.853	-0.23	222824	261208	0	3.59	3	-0.23	-0.302001	-1.4283	0.0766027	2717	0.00403027	FALSE	0.811127
2966	High	Master Protein	P61289	Proteasome activator complex subunit 3 OS=Homo sapiens GN=PSME3 PE=1 SV=1	12.2047	3	7	3	1	254	High	High	0.853	-0.23	174744	204804	0	8.52	3	-0.23	-0.302001	-1.4283	0.0766027	2718	0.00402254	FALSE	0.811127
2967	High	Master Protein	P26885	Peptidyl-prolyl cis-trans isomerase FKBP2 OS=Homo sapiens GN=FKBP2 PE=1 SV=2	38.0282	6	13	6	1	142	High	High	0.852	-0.23	1.42966e+06	1.67891e+06	0	40.66	6	-0.23	-0.302001	-1.4283	0.0766027	2719	0.00401482	FALSE	0.811127
2968	High	Master Protein	Q9ULH0	Kinase D-interacting substrate of 220 kDa OS=Homo sapiens GN=KIDINS220 PE=1 SV=3	1.41163	2	2	2	1	1771	High	High	0.852	-0.23	28560.6	33513.2	0	2.71	2	-0.23	-0.302001	-1.4283	0.0766027	2720	0.0040071	FALSE	0.811127
2969	High	Master Protein	Q13740	CD166 antigen OS=Homo sapiens GN=ALCAM PE=1 SV=2	8.4048	4	6	4	1	583	High	High	0.851	-0.23	503060	591012	0	18.3	4	-0.23	-0.302001	-1.4283	0.0766027	2721	0.00399938	FALSE	0.811127
2970	High	Master Protein	O76096	Cystatin-F OS=Homo sapiens GN=CST7 PE=1 SV=1	12.4138	2	3	2	1	145	High	High	0.851	-0.23	436644	513288	0	2.86	2	-0.23	-0.302001	-1.4283	0.0766027	2722	0.00399166	FALSE	0.811127
2971	High	Master Protein	P21796	Voltage-dependent anion-selective channel protein 1 OS=Homo sapiens GN=VDAC1 PE=1 SV=2	74.5583	18	126	17	1	283	High	High	0.85	-0.23	5.72366e+07	6.72988e+07	1	411.31	18	-0.23	-0.302001	-1.4283	0.0766027	2723	0.00398394	FALSE	0.811127
2972	High	Master Protein	P13073	Cytochrome c oxidase subunit 4 isoform 1, mitochondrial OS=Homo sapiens GN=COX4I1 PE=1 SV=1	37.8698	8	35	8	1	169	High	High	0.85	-0.23	1.49297e+07	1.75688e+07	0	80.83	8	-0.23	-0.302001	-1.4283	0.0766027	2724	0.00397622	FALSE	0.811127
2973	High	Master Protein	P61009	Signal peptidase complex subunit 3 OS=Homo sapiens GN=SPCS3 PE=1 SV=1	17.7778	3	8	3	1	180	High	High	0.85	-0.23	1.76355e+06	2.07401e+06	0	21.42	3	-0.23	-0.302001	-1.4283	0.0766027	2725	0.0039685	FALSE	0.811127
2974	High	Master Protein	Q96CX2	BTB/POZ domain-containing protein KCTD12 OS=Homo sapiens GN=KCTD12 PE=1 SV=1	8.92308	3	3	3	1	325	High	High	0.85	-0.23	68863.6	80981.1	0	4.27	3	-0.23	-0.302001	-1.4283	0.0766027	2726	0.00396078	FALSE	0.811127
2975	High	Master Protein	Q9HD33	39S ribosomal protein L47, mitochondrial OS=Homo sapiens GN=MRPL47 PE=1 SV=2	8.4	2	2	2	1	250	High	High	0.85	-0.23	81725.1	96136.3	0	4.87	2	-0.23	-0.302001	-1.4283	0.0766027	2727	0.00395306	FALSE	0.811127
2976	High	Master Protein	O76070	Gamma-synuclein OS=Homo sapiens GN=SNCG PE=1 SV=2	19.685	2	2	2	1	127	High	High	0.85	-0.23	41408.7	48727.2	0	0	2	-0.23	-0.302001	-1.4283	0.0766027	2728	0.00394534	FALSE	0.811127
2921	High	Master Protein	Q9NQC3	Reticulon-4 OS=Homo sapiens GN=RTN4 PE=1 SV=2	6.04027	7	23	7	1	1192	High	High	0.862	-0.22	8.89112e+06	1.03201e+07	0	72.08	7	-0.22	-0.292001	-1.38131	0.0835911	2648	0.004563	FALSE	0.816768
2926	High	Master Protein	P07996	Thrombospondin-1 OS=Homo sapiens GN=THBS1 PE=1 SV=2	25.4701	21	32	20	1	1170	High	High	0.861	-0.22	2.05144e+06	2.38337e+06	1	69.61	21	-0.22	-0.292001	-1.38131	0.0835911	2649	0.00455528	FALSE	0.816768
2927	High	Master Protein	P54727	UV excision repair protein RAD23 homolog B OS=Homo sapiens GN=RAD23B PE=1 SV=1	10.7579	5	9	5	1	409	High	High	0.861	-0.22	1.09236e+06	1.26879e+06	0	19.85	5	-0.22	-0.292001	-1.38131	0.0835911	2650	0.00454756	FALSE	0.816768
2928	High	Master Protein	O14745	Na(+)/H(+) exchange regulatory cofactor NHE-RF1 OS=Homo sapiens GN=SLC9A3R1 PE=1 SV=4	6.70391	2	3	2	1	358	High	High	0.861	-0.22	64446	74853.4	0	1.74	2	-0.22	-0.292001	-1.38131	0.0835911	2651	0.00453984	FALSE	0.816768
2929	High	Master Protein	Q9P2E9	Ribosome-binding protein 1 OS=Homo sapiens GN=RRBP1 PE=1 SV=4	48.9362	54	79	53	1	1410	High	High	0.86	-0.22	9.37168e+06	1.0903e+07	1	135.44	54	-0.22	-0.292001	-1.38131	0.0835911	2652	0.00453212	FALSE	0.816768
2930	High	Master Protein	Q9NVA2	Septin-11 OS=Homo sapiens GN=SEPT11 PE=1 SV=3	26.1072	10	18	8	1	429	High	High	0.86	-0.22	816949	949865	1	40.78	10	-0.22	-0.292001	-1.38131	0.0835911	2653	0.0045244	FALSE	0.816768
2931	High	Master Protein	P31937	3-hydroxyisobutyrate dehydrogenase, mitochondrial OS=Homo sapiens GN=HIBADH PE=1 SV=2	33.631	7	19	7	1	336	High	High	0.86	-0.22	2.1378e+06	2.48674e+06	0	53.17	7	-0.22	-0.292001	-1.38131	0.0835911	2654	0.00451668	FALSE	0.816768
2932	High	Master Protein	P40121	Macrophage-capping protein OS=Homo sapiens GN=CAPG PE=1 SV=2	18.3908	6	10	6	1	348	High	High	0.86	-0.22	1.19337e+06	1.38798e+06	0	28.89	6	-0.22	-0.292001	-1.38131	0.0835911	2655	0.00450896	FALSE	0.816768
2933	High	Master Protein	P25705	ATP synthase subunit alpha, mitochondrial OS=Homo sapiens GN=ATP5A1 PE=1 SV=1	57.5045	33	164	33	1	553	High	High	0.859	-0.22	5.74711e+07	6.6885e+07	0	404.2	33	-0.22	-0.292001	-1.38131	0.0835911	2656	0.00450124	FALSE	0.816768
2934	High	Master Protein	Q99798	Aconitate hydratase, mitochondrial OS=Homo sapiens GN=ACO2 PE=1 SV=2	43.5897	31	67	31	1	780	High	High	0.859	-0.22	1.01051e+07	1.17657e+07	0	184.35	31	-0.22	-0.292001	-1.38131	0.0835911	2657	0.00449351	FALSE	0.816768
2935	High	Master Protein	P35241	Radixin OS=Homo sapiens GN=RDX PE=1 SV=1	37.7358	27	61	14	1	583	High	High	0.859	-0.22	4.93607e+06	5.74852e+06	2	119.32	27	-0.22	-0.292001	-1.38131	0.0835911	2658	0.00448579	FALSE	0.816768
2936	High	Master Protein	O75390	Citrate synthase, mitochondrial OS=Homo sapiens GN=CS PE=1 SV=2	29.3991	13	41	13	1	466	High	High	0.859	-0.22	1.4587e+07	1.69896e+07	0	97.92	13	-0.22	-0.292001	-1.38131	0.0835911	2659	0.00447807	FALSE	0.816768
2937	High	Master Protein	P32119	Peroxiredoxin-2 OS=Homo sapiens GN=PRDX2 PE=1 SV=5	41.9192	10	33	9	1	198	High	High	0.859	-0.22	8.47968e+06	9.86802e+06	0	84.55	10	-0.22	-0.292001	-1.38131	0.0835911	2660	0.00447035	FALSE	0.816768
2938	High	Master Protein	P09493	Tropomyosin alpha-1 chain OS=Homo sapiens GN=TPM1 PE=1 SV=2	31.338	15	26	6	1	284	High	High	0.859	-0.22	705770	821201	0	42.22	15	-0.22	-0.292001	-1.38131	0.0835911	2661	0.00446263	FALSE	0.816768
2939	High	Master Protein	P40306	Proteasome subunit beta type-10 OS=Homo sapiens GN=PSMB10 PE=1 SV=1	13.5531	3	6	3	1	273	High	High	0.859	-0.22	118723	138231	0	17.47	3	-0.22	-0.292001	-1.38131	0.0835911	2662	0.00445491	FALSE	0.816768
2940	High	Master Protein	Q16537	Serine/threonine-protein phosphatase 2A 56 kDa regulatory subunit epsilon isoform OS=Homo sapiens GN=PPP2R5E PE=1 SV=1	4.06852	2	2	2	1	467	High	High	0.859	-0.22	16876.3	19640.3	0	2.44	2	-0.22	-0.292001	-1.38131	0.0835911	2663	0.00444719	FALSE	0.816768
2941	High	Master Protein	Q8WXX5	DnaJ homolog subfamily C member 9 OS=Homo sapiens GN=DNAJC9 PE=1 SV=1	8.46154	2	2	2	1	260	High	High	0.859	-0.22	40820.2	47514	0	2.78	2	-0.22	-0.292001	-1.38131	0.0835911	2664	0.00443947	FALSE	0.816768
2942	High	Master Protein	Q7Z4H8	KDEL motif-containing protein 2 OS=Homo sapiens GN=KDELC2 PE=1 SV=2	24.4576	10	20	10	1	507	High	High	0.858	-0.22	2.88454e+06	3.36366e+06	0	44.21	10	-0.22	-0.292001	-1.38131	0.0835911	2665	0.00443175	FALSE	0.816768
2943	High	Master Protein	P17174	Aspartate aminotransferase, cytoplasmic OS=Homo sapiens GN=GOT1 PE=1 SV=3	17.1913	7	9	7	1	413	High	High	0.858	-0.22	1.08701e+06	1.26686e+06	0	23.58	7	-0.22	-0.292001	-1.38131	0.0835911	2666	0.00442403	FALSE	0.816768
2944	High	Master Protein	P15529	Membrane cofactor protein OS=Homo sapiens GN=CD46 PE=1 SV=3	9.94898	4	6	4	1	392	High	High	0.858	-0.22	1.62022e+06	1.88771e+06	0	14.77	4	-0.22	-0.292001	-1.38131	0.0835911	2667	0.00441631	FALSE	0.816768
2945	High	Master Protein	P04080	Cystatin-B OS=Homo sapiens GN=CSTB PE=1 SV=2	21.4286	2	7	2	1	98	High	High	0.858	-0.22	463442	540051	0	27.58	2	-0.22	-0.292001	-1.38131	0.0835911	2668	0.00440859	FALSE	0.816768
2946	High	Master Protein	Q02218	2-oxoglutarate dehydrogenase, mitochondrial OS=Homo sapiens GN=OGDH PE=1 SV=3	22.8739	27	52	27	1	1023	High	High	0.857	-0.22	5.28586e+06	6.1704e+06	0	119.72	27	-0.22	-0.292001	-1.38131	0.0835911	2669	0.00440086	FALSE	0.816768
2947	High	Master Protein	Q9HAV7	GrpE protein homolog 1, mitochondrial OS=Homo sapiens GN=GRPEL1 PE=1 SV=2	44.2396	9	17	9	1	217	High	High	0.857	-0.22	2.62843e+06	3.06686e+06	0	33.17	9	-0.22	-0.292001	-1.38131	0.0835911	2670	0.00439314	FALSE	0.816768
2948	High	Master Protein	O14979	Heterogeneous nuclear ribonucleoprotein D-like OS=Homo sapiens GN=HNRNPDL PE=1 SV=3	16.4286	9	20	7	1	420	High	High	0.857	-0.22	1.70932e+06	1.99555e+06	0	42.34	9	-0.22	-0.292001	-1.38131	0.0835911	2671	0.00438542	FALSE	0.816768
2949	High	Master Protein	P10253	Lysosomal alpha-glucosidase OS=Homo sapiens GN=GAA PE=1 SV=4	4.20168	3	3	3	1	952	High	High	0.857	-0.22	152470	177815	0	2	3	-0.22	-0.292001	-1.38131	0.0835911	2672	0.0043777	FALSE	0.816768
2950	High	Master Protein	Q10469	Alpha-1,6-mannosyl-glycoprotein 2-beta-N-acetylglucosaminyltransferase OS=Homo sapiens GN=MGAT2 PE=1 SV=1	6.4877	3	6	3	1	447	High	High	0.857	-0.22	255149	297567	0	4.06	3	-0.22	-0.292001	-1.38131	0.0835911	2673	0.00436998	FALSE	0.816768
2951	High	Master Protein	Q9Y6M9	NADH dehydrogenase [ubiquinone] 1 beta subcomplex subunit 9 OS=Homo sapiens GN=NDUFB9 PE=1 SV=3	31.8436	7	16	7	1	179	High	High	0.856	-0.22	1.01953e+06	1.19081e+06	0	30.97	7	-0.22	-0.292001	-1.38131	0.0835911	2674	0.00436226	FALSE	0.816768
2952	High	Master Protein	Q96JJ7	Protein disulfide-isomerase TMX3 OS=Homo sapiens GN=TMX3 PE=1 SV=2	11.4537	6	11	6	1	454	High	High	0.856	-0.22	772200	902400	0	21.74	6	-0.22	-0.292001	-1.38131	0.0835911	2675	0.00435454	FALSE	0.816768
2953	High	Master Protein	Q9GZT8	NIF3-like protein 1 OS=Homo sapiens GN=NIF3L1 PE=1 SV=2	14.0584	4	4	4	1	377	High	High	0.856	-0.22	302392	353142	0	12.91	4	-0.22	-0.292001	-1.38131	0.0835911	2676	0.00434682	FALSE	0.816768
2954	High	Master Protein	P08842	Steryl-sulfatase OS=Homo sapiens GN=STS PE=1 SV=2	8.23328	4	5	4	1	583	High	High	0.856	-0.22	286427	334675	0	10.62	4	-0.22	-0.292001	-1.38131	0.0835911	2677	0.0043391	FALSE	0.816768
2903	High	Master Protein	P31930	Cytochrome b-c1 complex subunit 1, mitochondrial OS=Homo sapiens GN=UQCRC1 PE=1 SV=3	41.4583	17	70	17	1	480	High	High	0.867	-0.21	8.20418e+06	9.45844e+06	0	191.37	17	-0.21	-0.282001	-1.33433	0.091048	2608	0.00487183	FALSE	0.822449
2904	High	Master Protein	P19404	NADH dehydrogenase [ubiquinone] flavoprotein 2, mitochondrial OS=Homo sapiens GN=NDUFV2 PE=1 SV=2	30.5221	8	17	8	1	249	High	High	0.867	-0.21	1.19169e+06	1.37502e+06	0	29.98	8	-0.21	-0.282001	-1.33433	0.091048	2609	0.00486411	FALSE	0.822449
2905	High	Master Protein	Q14019	Coactosin-like protein OS=Homo sapiens GN=COTL1 PE=1 SV=3	50.7042	8	17	8	1	142	High	High	0.866	-0.21	1.41483e+06	1.634e+06	0	28.06	8	-0.21	-0.282001	-1.33433	0.091048	2610	0.00485639	FALSE	0.822449
2906	High	Master Protein	Q13492	Phosphatidylinositol-binding clathrin assembly protein OS=Homo sapiens GN=PICALM PE=1 SV=2	4.7546	3	4	3	1	652	High	High	0.866	-0.21	235784	272234	0	5.67	3	-0.21	-0.282001	-1.33433	0.091048	2611	0.00484867	FALSE	0.822449
2907	High	Master Protein	P13798	Acylamino-acid-releasing enzyme OS=Homo sapiens GN=APEH PE=1 SV=4	2.59563	2	3	2	1	732	High	High	0.866	-0.21	121636	140501	0	2.04	2	-0.21	-0.282001	-1.33433	0.091048	2612	0.00484095	FALSE	0.822449
2908	High	Master Protein	Q09666	Neuroblast differentiation-associated protein AHNAK OS=Homo sapiens GN=AHNAK PE=1 SV=2	36.0272	99	185	99	1	5890	High	High	0.865	-0.21	1.28122e+07	1.48201e+07	0	371.6	99	-0.21	-0.282001	-1.33433	0.091048	2613	0.00483323	FALSE	0.822449
2909	High	Master Protein	P35232	Prohibitin OS=Homo sapiens GN=PHB PE=1 SV=1	85.2941	21	97	21	1	272	High	High	0.865	-0.21	2.65778e+07	3.07246e+07	0	295.33	21	-0.21	-0.282001	-1.33433	0.091048	2614	0.00482551	FALSE	0.822449
2910	High	Master Protein	O43399	Tumor protein D54 OS=Homo sapiens GN=TPD52L2 PE=1 SV=2	24.7573	6	7	6	1	206	High	High	0.865	-0.21	821092	949397	0	15.54	6	-0.21	-0.282001	-1.33433	0.091048	2615	0.00481779	FALSE	0.822449
2911	High	Master Protein	Q9UFN0	Protein NipSnap homolog 3A OS=Homo sapiens GN=NIPSNAP3A PE=1 SV=2	20.2429	4	8	4	1	247	High	High	0.865	-0.21	1.91042e+06	2.20943e+06	0	21.88	4	-0.21	-0.282001	-1.33433	0.091048	2616	0.00481007	FALSE	0.822449
2912	High	Master Protein	Q16718	NADH dehydrogenase [ubiquinone] 1 alpha subcomplex subunit 5 OS=Homo sapiens GN=NDUFA5 PE=1 SV=3	30.1724	4	14	4	1	116	High	High	0.865	-0.21	785791	908783	0	24.4	4	-0.21	-0.282001	-1.33433	0.091048	2617	0.00480235	FALSE	0.822449
2913	High	Master Protein	P07942	Laminin subunit beta-1 OS=Homo sapiens GN=LAMB1 PE=1 SV=2	10.9742	15	19	15	1	1786	High	High	0.864	-0.21	1.59682e+06	1.84837e+06	0	37.45	15	-0.21	-0.282001	-1.33433	0.091048	2618	0.00479463	FALSE	0.822449
2914	High	Master Protein	P04062	Glucosylceramidase OS=Homo sapiens GN=GBA PE=1 SV=3	25.9328	12	25	12	1	536	High	High	0.864	-0.21	3.28713e+06	3.80589e+06	0	57.86	12	-0.21	-0.282001	-1.33433	0.091048	2619	0.00478691	FALSE	0.822449
2915	High	Master Protein	Q6P587	Acylpyruvase FAHD1, mitochondrial OS=Homo sapiens GN=FAHD1 PE=1 SV=2	20.9821	3	5	3	1	224	High	High	0.864	-0.21	130411	150985	0	14.12	3	-0.21	-0.282001	-1.33433	0.091048	2620	0.00477918	FALSE	0.822449
2916	High	Master Protein	P06396	Gelsolin OS=Homo sapiens GN=GSN PE=1 SV=1	23.913	21	54	21	1	782	High	High	0.863	-0.21	6.93095e+06	8.02926e+06	0	130.31	21	-0.21	-0.282001	-1.33433	0.091048	2621	0.00477146	FALSE	0.822449
2917	High	Master Protein	Q99497	Protein DJ-1 OS=Homo sapiens GN=PARK7 PE=1 SV=2	59.7884	10	24	10	1	189	High	High	0.863	-0.21	5.74702e+06	6.65865e+06	0	54.85	10	-0.21	-0.282001	-1.33433	0.091048	2622	0.00476374	FALSE	0.822449
2918	High	Master Protein	O75122	CLIP-associating protein 2 OS=Homo sapiens GN=CLASP2 PE=1 SV=2	3.16847	4	6	2	1	1294	High	High	0.863	-0.21	49438.6	57319.9	0	10.36	4	-0.21	-0.282001	-1.33433	0.091048	2623	0.00475602	FALSE	0.822449
2919	High	Master Protein	Q9NZD8	Maspardin OS=Homo sapiens GN=SPG21 PE=1 SV=1	9.41558	2	2	2	1	308	High	High	0.863	-0.21	82392.6	95476.2	0	7.01	2	-0.21	-0.282001	-1.33433	0.091048	2624	0.0047483	FALSE	0.822449
2920	High	Master Protein	O75489	NADH dehydrogenase [ubiquinone] iron-sulfur protein 3, mitochondrial OS=Homo sapiens GN=NDUFS3 PE=1 SV=1	42.0455	10	25	10	1	264	High	High	0.862	-0.21	3.85549e+06	4.47349e+06	0	61.14	10	-0.21	-0.282001	-1.33433	0.091048	2625	0.00474058	FALSE	0.822449
2922	High	Master Protein	P05141	ADP/ATP translocase 2 OS=Homo sapiens GN=SLC25A5 PE=1 SV=7	48.6577	19	117	6	1	298	High	High	0.862	-0.21	2.12998e+07	2.4706e+07	0	338.44	19	-0.21	-0.282001	-1.33433	0.091048	2626	0.00473286	FALSE	0.822449
2923	High	Master Protein	O95861	3'(2'),5'-bisphosphate nucleotidase 1 OS=Homo sapiens GN=BPNT1 PE=1 SV=1	16.8831	4	6	4	1	308	High	High	0.862	-0.21	205901	238828	0	16.2	4	-0.21	-0.282001	-1.33433	0.091048	2627	0.00472514	FALSE	0.822449
2924	High	Master Protein	Q6UWE0	E3 ubiquitin-protein ligase LRSAM1 OS=Homo sapiens GN=LRSAM1 PE=1 SV=1	4.70263	3	3	3	1	723	High	High	0.862	-0.21	134980	156604	0	4.01	3	-0.21	-0.282001	-1.33433	0.091048	2628	0.00471742	FALSE	0.822449
2925	High	Master Protein	Q5VW32	BRO1 domain-containing protein BROX OS=Homo sapiens GN=BROX PE=1 SV=1	8.75912	3	3	3	1	411	High	High	0.862	-0.21	214705	248975	0	10.07	3	-0.21	-0.282001	-1.33433	0.091048	2629	0.0047097	FALSE	0.822449
2875	High	Master Protein	P12081	Histidine--tRNA ligase, cytoplasmic OS=Homo sapiens GN=HARS PE=1 SV=2	23.5756	12	17	9	1	509	High	High	0.874	-0.2	928172	1.06251e+06	3	37.58	12	-0.2	-0.272001	-1.28734	0.0989874	2552	0.0053042	FALSE	0.82817
2876	High	Master Protein	Q9H3Z4	DnaJ homolog subfamily C member 5 OS=Homo sapiens GN=DNAJC5 PE=1 SV=1	20.7071	5	11	5	1	198	High	High	0.874	-0.2	2.66422e+06	3.04999e+06	0	25.51	5	-0.2	-0.272001	-1.28734	0.0989874	2553	0.00529648	FALSE	0.82817
2878	High	Master Protein	P07099	Epoxide hydrolase 1 OS=Homo sapiens GN=EPHX1 PE=1 SV=1	36.7033	20	65	20	1	455	High	High	0.873	-0.2	1.16906e+07	1.33925e+07	0	163.36	20	-0.2	-0.272001	-1.28734	0.0989874	2554	0.00528876	FALSE	0.82817
2879	High	Master Protein	P16070	CD44 antigen OS=Homo sapiens GN=CD44 PE=1 SV=3	13.2075	10	41	10	1	742	High	High	0.873	-0.2	7.65407e+06	8.76548e+06	0	101.33	10	-0.2	-0.272001	-1.28734	0.0989874	2555	0.00528104	FALSE	0.82817
2880	High	Master Protein	Q13445	Transmembrane emp24 domain-containing protein 1 OS=Homo sapiens GN=TMED1 PE=1 SV=1	23.348	5	11	5	1	227	High	High	0.873	-0.2	1.29564e+06	1.4834e+06	0	21.28	5	-0.2	-0.272001	-1.28734	0.0989874	2556	0.00527332	FALSE	0.82817
2881	High	Master Protein	Q99988	Growth/differentiation factor 15 OS=Homo sapiens GN=GDF15 PE=1 SV=3	10.3896	2	2	2	1	308	High	High	0.873	-0.2	37189.1	42598.2	0	4.38	2	-0.2	-0.272001	-1.28734	0.0989874	2557	0.0052656	FALSE	0.82817
2882	High	Master Protein	P05556	Integrin beta-1 OS=Homo sapiens GN=ITGB1 PE=1 SV=2	31.9549	26	105	26	1	798	High	High	0.872	-0.2	2.09757e+07	2.40532e+07	0	303.23	26	-0.2	-0.272001	-1.28734	0.0989874	2558	0.00525788	FALSE	0.82817
2883	High	Master Protein	P51151	Ras-related protein Rab-9A OS=Homo sapiens GN=RAB9A PE=1 SV=1	30.3483	6	9	6	1	201	High	High	0.872	-0.2	849542	974241	0	14.43	6	-0.2	-0.272001	-1.28734	0.0989874	2559	0.00525015	FALSE	0.82817
2884	High	Master Protein	Q9NX40	OCIA domain-containing protein 1 OS=Homo sapiens GN=OCIAD1 PE=1 SV=1	32.2449	6	10	6	1	245	High	High	0.872	-0.2	772685	885870	0	30.43	6	-0.2	-0.272001	-1.28734	0.0989874	2560	0.00524243	FALSE	0.82817
2885	High	Master Protein	Q9UEY8	Gamma-adducin OS=Homo sapiens GN=ADD3 PE=1 SV=1	8.07365	5	6	5	1	706	High	High	0.872	-0.2	211786	242804	0	7.9	5	-0.2	-0.272001	-1.28734	0.0989874	2561	0.00523471	FALSE	0.82817
2886	High	Master Protein	P55084	Trifunctional enzyme subunit beta, mitochondrial OS=Homo sapiens GN=HADHB PE=1 SV=3	41.5612	22	55	22	1	474	High	High	0.871	-0.2	1.12357e+07	1.29007e+07	0	128.29	22	-0.2	-0.272001	-1.28734	0.0989874	2562	0.00522699	FALSE	0.82817
2887	High	Master Protein	P06744	Glucose-6-phosphate isomerase OS=Homo sapiens GN=GPI PE=1 SV=4	21.5054	14	24	14	1	558	High	High	0.871	-0.2	3.89376e+06	4.47042e+06	0	55.44	14	-0.2	-0.272001	-1.28734	0.0989874	2563	0.00521927	FALSE	0.82817
2888	High	Master Protein	Q8NC51	Plasminogen activator inhibitor 1 RNA-binding protein OS=Homo sapiens GN=SERBP1 PE=1 SV=2	20.8333	8	10	8	1	408	High	High	0.871	-0.2	426876	490077	0	15.09	8	-0.2	-0.272001	-1.28734	0.0989874	2564	0.00521155	FALSE	0.82817
2889	High	Master Protein	Q16270	Insulin-like growth factor-binding protein 7 OS=Homo sapiens GN=IGFBP7 PE=1 SV=1	22.695	5	7	5	1	282	High	High	0.871	-0.2	733191	841977	0	13.81	5	-0.2	-0.272001	-1.28734	0.0989874	2565	0.00520383	FALSE	0.82817
2890	High	Master Protein	P10620	Microsomal glutathione S-transferase 1 OS=Homo sapiens GN=MGST1 PE=1 SV=1	12.2581	4	9	4	1	155	High	High	0.871	-0.2	4.22521e+06	4.85192e+06	0	35.46	4	-0.2	-0.272001	-1.28734	0.0989874	2566	0.00519611	FALSE	0.82817
2891	High	Master Protein	Q15404	Ras suppressor protein 1 OS=Homo sapiens GN=RSU1 PE=1 SV=3	15.5235	4	5	4	1	277	High	High	0.871	-0.2	349499	401153	0	15.22	4	-0.2	-0.272001	-1.28734	0.0989874	2567	0.00518839	FALSE	0.82817
2892	High	Master Protein	Q13753	Laminin subunit gamma-2 OS=Homo sapiens GN=LAMC2 PE=1 SV=2	2.17938	2	2	2	1	1193	High	High	0.871	-0.2	36390	41762.3	0	0	2	-0.2	-0.272001	-1.28734	0.0989874	2568	0.00518067	FALSE	0.82817
2893	High	Master Protein	P15509	Granulocyte-macrophage colony-stimulating factor receptor subunit alpha OS=Homo sapiens GN=CSF2RA PE=1 SV=1	8.5	2	3	2	1	400	High	High	0.871	-0.2	112700	129413	0	4.1	2	-0.2	-0.272001	-1.28734	0.0989874	2569	0.00517295	FALSE	0.82817
2894	High	Master Protein	Q9NZM1	Myoferlin OS=Homo sapiens GN=MYOF PE=1 SV=1	55.6526	113	321	111	1	2061	High	High	0.87	-0.2	5.45577e+07	6.26803e+07	2	805.3	113	-0.2	-0.272001	-1.28734	0.0989874	2570	0.00516523	FALSE	0.82817
2895	High	Master Protein	P55196	Afadin OS=Homo sapiens GN=AFDN PE=1 SV=3	2.41228	3	3	3	1	1824	High	High	0.87	-0.2	101868	117067	0	5.81	3	-0.2	-0.272001	-1.28734	0.0989874	2571	0.0051575	FALSE	0.82817
2896	High	Master Protein	P00390	Glutathione reductase, mitochondrial OS=Homo sapiens GN=GSR PE=1 SV=2	22.6054	7	12	7	1	522	High	High	0.869	-0.2	895198	1.03058e+06	0	26.72	7	-0.2	-0.272001	-1.28734	0.0989874	2572	0.00514978	FALSE	0.82817
2897	High	Master Protein	P48509	CD151 antigen OS=Homo sapiens GN=CD151 PE=1 SV=3	17.7866	6	18	6	1	253	High	High	0.869	-0.2	4.28989e+06	4.93732e+06	0	45.68	6	-0.2	-0.272001	-1.28734	0.0989874	2573	0.00514206	FALSE	0.82817
2898	High	Master Protein	P07948	Tyrosine-protein kinase Lyn OS=Homo sapiens GN=LYN PE=1 SV=3	10.3516	6	9	3	1	512	High	High	0.869	-0.2	67445.7	77632.5	0	16.01	6	-0.2	-0.272001	-1.28734	0.0989874	2574	0.00513434	FALSE	0.82817
2899	High	Master Protein	O95772	STARD3 N-terminal-like protein OS=Homo sapiens GN=STARD3NL PE=1 SV=1	8.97436	2	4	2	1	234	High	High	0.869	-0.2	324268	373204	0	9.79	2	-0.2	-0.272001	-1.28734	0.0989874	2575	0.00512662	FALSE	0.82817
2900	High	Master Protein	Q96IK0	Transmembrane protein 101 OS=Homo sapiens GN=TMEM101 PE=1 SV=1	10.5058	2	2	2	1	257	High	High	0.869	-0.2	78390.5	90254.4	0	4	2	-0.2	-0.272001	-1.28734	0.0989874	2576	0.0051189	FALSE	0.82817
2901	High	Master Protein	Q16851	UTP--glucose-1-phosphate uridylyltransferase OS=Homo sapiens GN=UGP2 PE=1 SV=5	22.4409	9	14	9	1	508	High	High	0.868	-0.2	1.24793e+06	1.4381e+06	0	43.91	9	-0.2	-0.272001	-1.28734	0.0989874	2577	0.00511118	FALSE	0.82817
2902	High	Master Protein	P02751	Fibronectin OS=Homo sapiens GN=FN1 PE=1 SV=4	4.31685	8	10	8	1	2386	High	High	0.868	-0.2	570045	656877	0	14.34	8	-0.2	-0.272001	-1.28734	0.0989874	2578	0.00510346	FALSE	0.82817
2853	High	Master Protein	P61981	14-3-3 protein gamma OS=Homo sapiens GN=YWHAG PE=1 SV=2	45.749	11	37	6	1	247	High	High	0.879	-0.19	1.0528e+06	1.19796e+06	1	72.1	11	-0.19	-0.262001	-1.24036	0.107422	2508	0.00564392	FALSE	0.83393
2854	High	Master Protein	P30042	ES1 protein homolog, mitochondrial OS=Homo sapiens GN=C21orf33 PE=1 SV=3	19.7761	5	12	5	1	268	High	High	0.879	-0.19	1.82503e+06	2.07602e+06	0	32.98	5	-0.19	-0.262001	-1.24036	0.107422	2509	0.0056362	FALSE	0.83393
2855	High	Master Protein	Q9Y3D6	Mitochondrial fission 1 protein OS=Homo sapiens GN=FIS1 PE=1 SV=2	21.0526	4	9	4	1	152	High	High	0.879	-0.19	1.67082e+06	1.90165e+06	0	29.03	4	-0.19	-0.262001	-1.24036	0.107422	2510	0.00562847	FALSE	0.83393
2856	High	Master Protein	P53680	AP-2 complex subunit sigma OS=Homo sapiens GN=AP2S1 PE=1 SV=2	24.6479	4	9	4	1	142	High	High	0.879	-0.19	767247	872483	0	21.33	4	-0.19	-0.262001	-1.24036	0.107422	2511	0.00562075	FALSE	0.83393
2857	High	Master Protein	Q9H269	Vacuolar protein sorting-associated protein 16 homolog OS=Homo sapiens GN=VPS16 PE=1 SV=2	8.58164	5	5	5	1	839	High	High	0.878	-0.19	236692	269664	0	7.88	5	-0.19	-0.262001	-1.24036	0.107422	2512	0.00561303	FALSE	0.83393
2858	High	Master Protein	P31150	Rab GDP dissociation inhibitor alpha OS=Homo sapiens GN=GDI1 PE=1 SV=2	28.1879	10	14	5	1	447	High	High	0.878	-0.19	73453.3	83682.7	0	33.59	10	-0.19	-0.262001	-1.24036	0.107422	2513	0.00560531	FALSE	0.83393
2859	High	Master Protein	Q9GZT3	SRA stem-loop-interacting RNA-binding protein, mitochondrial OS=Homo sapiens GN=SLIRP PE=1 SV=1	57.7982	5	9	5	1	109	High	High	0.878	-0.19	1.13488e+06	1.29248e+06	0	23.47	5	-0.19	-0.262001	-1.24036	0.107422	2514	0.00559759	FALSE	0.83393
2860	High	Master Protein	Q9Y3E7	Charged multivesicular body protein 3 OS=Homo sapiens GN=CHMP3 PE=1 SV=3	16.2162	4	4	4	1	222	High	High	0.878	-0.19	183528	209089	0	4.07	4	-0.19	-0.262001	-1.24036	0.107422	2515	0.00558987	FALSE	0.83393
2861	High	Master Protein	Q14596	Next to BRCA1 gene 1 protein OS=Homo sapiens GN=NBR1 PE=1 SV=3	3.41615	3	3	3	1	966	High	High	0.878	-0.19	59777.9	68045.6	0	6.44	3	-0.19	-0.262001	-1.24036	0.107422	2516	0.00558215	FALSE	0.83393
2862	High	Master Protein	Q8WWI5	Choline transporter-like protein 1 OS=Homo sapiens GN=SLC44A1 PE=1 SV=1	5.78387	3	3	3	1	657	High	High	0.877	-0.19	99317.1	113200	0	5.96	3	-0.19	-0.262001	-1.24036	0.107422	2517	0.00557443	FALSE	0.83393
2863	High	Master Protein	O95249	Golgi SNAP receptor complex member 1 OS=Homo sapiens GN=GOSR1 PE=1 SV=1	8.8	2	2	2	1	250	High	High	0.877	-0.19	188425	214962	0	6.3	2	-0.19	-0.262001	-1.24036	0.107422	2518	0.00556671	FALSE	0.83393
2864	High	Master Protein	Q93063	Exostosin-2 OS=Homo sapiens GN=EXT2 PE=1 SV=1	2.22841	2	2	2	1	718	High	High	0.877	-0.19	113073	128929	0	1.88	2	-0.19	-0.262001	-1.24036	0.107422	2519	0.00555899	FALSE	0.83393
2865	High	Master Protein	Q16850	Lanosterol 14-alpha demethylase OS=Homo sapiens GN=CYP51A1 PE=1 SV=3	4.17495	2	2	2	1	503	High	High	0.877	-0.19	77638.6	88515.7	0	1.8	2	-0.19	-0.262001	-1.24036	0.107422	2520	0.00555127	FALSE	0.83393
2866	High	Master Protein	Q6ZXV5	Transmembrane and TPR repeat-containing protein 3 OS=Homo sapiens GN=TMTC3 PE=1 SV=2	12.3497	10	13	9	1	915	High	High	0.876	-0.19	1.8248e+06	2.08324e+06	1	34.96	10	-0.19	-0.262001	-1.24036	0.107422	2521	0.00554355	FALSE	0.83393
2867	High	Master Protein	Q15836	Vesicle-associated membrane protein 3 OS=Homo sapiens GN=VAMP3 PE=1 SV=3	40	4	7	4	1	100	High	High	0.876	-0.19	223135	254738	0	19.07	4	-0.19	-0.262001	-1.24036	0.107422	2522	0.00553582	FALSE	0.83393
2868	High	Master Protein	Q5JRX3	Presequence protease, mitochondrial OS=Homo sapiens GN=PITRM1 PE=1 SV=3	27.7724	25	48	25	1	1037	High	High	0.875	-0.19	4.44494e+06	5.08037e+06	0	103.6	25	-0.19	-0.262001	-1.24036	0.107422	2523	0.0055281	FALSE	0.83393
2869	High	Master Protein	O14578	Citron Rho-interacting kinase OS=Homo sapiens GN=CIT PE=1 SV=2	3.35471	7	7	7	1	2027	High	High	0.875	-0.19	622103	711183	0	11.18	7	-0.19	-0.262001	-1.24036	0.107422	2524	0.00552038	FALSE	0.83393
2870	High	Master Protein	O95292	Vesicle-associated membrane protein-associated protein B/C OS=Homo sapiens GN=VAPB PE=1 SV=3	29.2181	6	8	5	1	243	High	High	0.875	-0.19	333458	381018	0	20.24	6	-0.19	-0.262001	-1.24036	0.107422	2525	0.00551266	FALSE	0.83393
2871	High	Master Protein	Q9NNW7	Thioredoxin reductase 2, mitochondrial OS=Homo sapiens GN=TXNRD2 PE=1 SV=3	12.5954	6	9	5	1	524	High	High	0.875	-0.19	1.13482e+06	1.29657e+06	0	21.62	6	-0.19	-0.262001	-1.24036	0.107422	2526	0.00550494	FALSE	0.83393
2872	High	Master Protein	Q9UGQ3	Solute carrier family 2, facilitated glucose transporter member 6 OS=Homo sapiens GN=SLC2A6 PE=1 SV=2	3.5503	2	2	2	1	507	High	High	0.875	-0.19	223241	255075	0	5.03	2	-0.19	-0.262001	-1.24036	0.107422	2527	0.00549722	FALSE	0.83393
2873	High	Master Protein	Q08380	Galectin-3-binding protein OS=Homo sapiens GN=LGALS3BP PE=1 SV=1	29.2308	13	39	13	1	585	High	High	0.874	-0.19	5.39769e+06	6.17235e+06	0	98.82	13	-0.19	-0.262001	-1.24036	0.107422	2528	0.0054895	FALSE	0.83393
2874	High	Master Protein	P47985	Cytochrome b-c1 complex subunit Rieske, mitochondrial OS=Homo sapiens GN=UQCRFS1 PE=1 SV=2	23.7226	10	30	10	1	274	High	High	0.874	-0.19	4.05859e+06	4.64397e+06	0	62.88	10	-0.19	-0.262001	-1.24036	0.107422	2529	0.00548178	FALSE	0.83393
2877	High	Master Protein	O15400	Syntaxin-7 OS=Homo sapiens GN=STX7 PE=1 SV=4	16.4751	3	5	3	1	261	High	High	0.874	-0.19	86704.9	99183.6	0	7.75	3	-0.19	-0.262001	-1.24036	0.107422	2530	0.00547406	FALSE	0.83393
2818	High	Master Protein	O95202	Mitochondrial proton/calcium exchanger protein OS=Homo sapiens GN=LETM1 PE=1 SV=1	38.0244	26	64	26	1	739	High	High	0.886	-0.18	9.36615e+06	1.05763e+07	0	145.52	26	-0.18	-0.252001	-1.19337	0.116362	2440	0.00616893	FALSE	0.839731
2820	High	Master Protein	P36551	Oxygen-dependent coproporphyrinogen-III oxidase, mitochondrial OS=Homo sapiens GN=CPOX PE=1 SV=3	15.859	6	10	6	1	454	High	High	0.886	-0.18	291997	329673	0	23.88	6	-0.18	-0.252001	-1.19337	0.116362	2441	0.00616121	FALSE	0.839731
2822	High	Master Protein	Q96AX1	Vacuolar protein sorting-associated protein 33A OS=Homo sapiens GN=VPS33A PE=1 SV=1	6.04027	4	4	4	1	596	High	High	0.886	-0.18	87502.3	98805.8	0	10.13	4	-0.18	-0.252001	-1.19337	0.116362	2442	0.00615349	FALSE	0.839731
2825	High	Master Protein	Q8NFG4	Folliculin OS=Homo sapiens GN=FLCN PE=1 SV=1	3.79965	2	3	2	1	579	High	High	0.886	-0.18	37812.5	42694	0	4.25	2	-0.18	-0.252001	-1.19337	0.116362	2443	0.00614577	FALSE	0.839731
2826	High	Master Protein	O00161	Synaptosomal-associated protein 23 OS=Homo sapiens GN=SNAP23 PE=1 SV=1	46.4455	7	8	7	1	211	High	High	0.885	-0.18	679629	767700	0	15.93	7	-0.18	-0.252001	-1.19337	0.116362	2444	0.00613805	FALSE	0.839731
2827	High	Master Protein	Q9UI14	Prenylated Rab acceptor protein 1 OS=Homo sapiens GN=RABAC1 PE=1 SV=1	10.2703	2	4	2	1	185	High	High	0.885	-0.18	53020	59878.8	0	4.76	2	-0.18	-0.252001	-1.19337	0.116362	2445	0.00613033	FALSE	0.839731
2828	High	Master Protein	P39060	Collagen alpha-1(XVIII) chain OS=Homo sapiens GN=COL18A1 PE=1 SV=5	2.39453	2	2	2	1	1754	High	High	0.885	-0.18	72137.1	81489.2	0	4.89	2	-0.18	-0.252001	-1.19337	0.116362	2446	0.00612261	FALSE	0.839731
2829	High	Master Protein	Q15293	Reticulocalbin-1 OS=Homo sapiens GN=RCN1 PE=1 SV=1	48.9426	20	82	20	1	331	High	High	0.884	-0.18	8.75845e+06	9.91076e+06	0	185.14	20	-0.18	-0.252001	-1.19337	0.116362	2447	0.00611489	FALSE	0.839731
2830	High	Master Protein	P17301	Integrin alpha-2 OS=Homo sapiens GN=ITGA2 PE=1 SV=1	12.7858	14	24	14	1	1181	High	High	0.884	-0.18	2.37679e+06	2.68851e+06	0	59.32	14	-0.18	-0.252001	-1.19337	0.116362	2448	0.00610716	FALSE	0.839731
2831	High	Master Protein	P29144	Tripeptidyl-peptidase 2 OS=Homo sapiens GN=TPP2 PE=1 SV=4	5.68455	6	6	6	1	1249	High	High	0.884	-0.18	185953	210354	0	10.24	6	-0.18	-0.252001	-1.19337	0.116362	2449	0.00609944	FALSE	0.839731
2832	High	Master Protein	Q13530	Serine incorporator 3 OS=Homo sapiens GN=SERINC3 PE=2 SV=2	11.6279	6	7	5	1	473	High	High	0.884	-0.18	1.39897e+06	1.58328e+06	1	24.04	6	-0.18	-0.252001	-1.19337	0.116362	2450	0.00609172	FALSE	0.839731
2833	High	Master Protein	Q96AC1	Fermitin family homolog 2 OS=Homo sapiens GN=FERMT2 PE=1 SV=1	8.67647	5	6	5	1	680	High	High	0.884	-0.18	402352	455281	0	15.3	5	-0.18	-0.252001	-1.19337	0.116362	2451	0.006084	FALSE	0.839731
2834	High	Master Protein	O43583	Density-regulated protein OS=Homo sapiens GN=DENR PE=1 SV=2	19.1919	3	3	3	1	198	High	High	0.884	-0.18	269789	305096	0	6.03	3	-0.18	-0.252001	-1.19337	0.116362	2452	0.00607628	FALSE	0.839731
2835	High	Master Protein	Q9BSH5	Haloacid dehalogenase-like hydrolase domain-containing protein 3 OS=Homo sapiens GN=HDHD3 PE=1 SV=1	19.1235	3	3	3	1	251	High	High	0.884	-0.18	16259.4	18385.7	0	6.36	3	-0.18	-0.252001	-1.19337	0.116362	2453	0.00606856	FALSE	0.839731
2836	High	Master Protein	P37235	Hippocalcin-like protein 1 OS=Homo sapiens GN=HPCAL1 PE=1 SV=3	50.2591	10	21	10	1	193	High	High	0.883	-0.18	1.3499e+06	1.52874e+06	0	47.56	10	-0.18	-0.252001	-1.19337	0.116362	2454	0.00606084	FALSE	0.839731
2837	High	Master Protein	P60660	Myosin light polypeptide 6 OS=Homo sapiens GN=MYL6 PE=1 SV=2	62.9139	9	36	9	1	151	High	High	0.883	-0.18	5.36612e+06	6.08009e+06	0	97.84	9	-0.18	-0.252001	-1.19337	0.116362	2455	0.00605312	FALSE	0.839731
2838	High	Master Protein	O60603	Toll-like receptor 2 OS=Homo sapiens GN=TLR2 PE=1 SV=1	7.78061	5	6	5	1	784	High	High	0.883	-0.18	213071	241252	0	10.83	5	-0.18	-0.252001	-1.19337	0.116362	2456	0.0060454	FALSE	0.839731
2839	High	Master Protein	Q9H6R3	Acyl-CoA synthetase short-chain family member 3, mitochondrial OS=Homo sapiens GN=ACSS3 PE=1 SV=1	4.51895	3	3	3	1	686	High	High	0.883	-0.18	92392.7	104679	0	2.27	3	-0.18	-0.252001	-1.19337	0.116362	2457	0.00603768	FALSE	0.839731
2840	High	Master Protein	P07384	Calpain-1 catalytic subunit OS=Homo sapiens GN=CAPN1 PE=1 SV=1	18.7675	12	21	12	1	714	High	High	0.882	-0.18	3.78483e+06	4.29027e+06	0	51.66	12	-0.18	-0.252001	-1.19337	0.116362	2458	0.00602996	FALSE	0.839731
2841	High	Master Protein	Q96DC8	Enoyl-CoA hydratase domain-containing protein 3, mitochondrial OS=Homo sapiens GN=ECHDC3 PE=1 SV=2	9.24092	3	3	3	1	303	High	High	0.882	-0.18	333306	378050	0	8.24	3	-0.18	-0.252001	-1.19337	0.116362	2459	0.00602224	FALSE	0.839731
2842	High	Master Protein	P50281	Matrix metalloproteinase-14 OS=Homo sapiens GN=MMP14 PE=1 SV=3	6.01375	3	3	3	1	582	High	High	0.882	-0.18	937261	1.06233e+06	0	9.42	3	-0.18	-0.252001	-1.19337	0.116362	2460	0.00601452	FALSE	0.839731
2843	High	Master Protein	Q9NV92	NEDD4 family-interacting protein 2 OS=Homo sapiens GN=NDFIP2 PE=1 SV=2	9.82143	2	2	2	1	336	High	High	0.882	-0.18	55584.4	63054.7	0	0	2	-0.18	-0.252001	-1.19337	0.116362	2461	0.00600679	FALSE	0.839731
2844	High	Master Protein	Q9Y6N5	Sulfide:quinone oxidoreductase, mitochondrial OS=Homo sapiens GN=SQOR PE=1 SV=1	43.1111	21	64	21	1	450	High	High	0.881	-0.18	1.07718e+07	1.22306e+07	0	184.48	21	-0.18	-0.252001	-1.19337	0.116362	2462	0.00599907	FALSE	0.839731
2845	High	Master Protein	P23229	Integrin alpha-6 OS=Homo sapiens GN=ITGA6 PE=1 SV=5	17.6991	18	30	18	1	1130	High	High	0.881	-0.18	3.28058e+06	3.72388e+06	0	62.73	18	-0.18	-0.252001	-1.19337	0.116362	2463	0.00599135	FALSE	0.839731
2846	High	Master Protein	Q2TB90	Putative hexokinase HKDC1 OS=Homo sapiens GN=HKDC1 PE=1 SV=3	12.4318	12	15	10	1	917	High	High	0.881	-0.18	1.30022e+06	1.47595e+06	0	33.73	12	-0.18	-0.252001	-1.19337	0.116362	2464	0.00598363	FALSE	0.839731
2847	High	Master Protein	P35222	Catenin beta-1 OS=Homo sapiens GN=CTNNB1 PE=1 SV=1	8.83483	6	9	3	1	781	High	High	0.881	-0.18	201614	228803	0	17.17	6	-0.18	-0.252001	-1.19337	0.116362	2465	0.00597591	FALSE	0.839731
2848	High	Master Protein	O95758	Polypyrimidine tract-binding protein 3 OS=Homo sapiens GN=PTBP3 PE=1 SV=2	9.78261	5	9	2	1	552	High	High	0.881	-0.18	90107.6	102284	0	20.07	5	-0.18	-0.252001	-1.19337	0.116362	2466	0.00596819	FALSE	0.839731
2849	High	Master Protein	Q30201	Hereditary hemochromatosis protein OS=Homo sapiens GN=HFE PE=1 SV=1	7.47126	2	3	2	1	348	High	High	0.881	-0.18	91522.7	103884	0	9.54	2	-0.18	-0.252001	-1.19337	0.116362	2467	0.00596047	FALSE	0.839731
2850	High	Master Protein	P30084	Enoyl-CoA hydratase, mitochondrial OS=Homo sapiens GN=ECHS1 PE=1 SV=4	56.5517	15	33	15	1	290	High	High	0.88	-0.18	1.3427e+07	1.52619e+07	0	91.24	15	-0.18	-0.252001	-1.19337	0.116362	2468	0.00595275	FALSE	0.839731
2851	High	Master Protein	P09960	Leukotriene A-4 hydrolase OS=Homo sapiens GN=LTA4H PE=1 SV=2	14.8936	8	9	8	1	611	High	High	0.88	-0.18	1.01789e+06	1.15627e+06	0	26.73	8	-0.18	-0.252001	-1.19337	0.116362	2469	0.00594503	FALSE	0.839731
2852	High	Master Protein	P43155	Carnitine O-acetyltransferase OS=Homo sapiens GN=CRAT PE=1 SV=5	11.1821	7	11	7	1	626	High	High	0.88	-0.18	645695	733964	0	26.73	7	-0.18	-0.252001	-1.19337	0.116362	2470	0.00593731	FALSE	0.839731
2780	High	Master Protein	Q07960	Rho GTPase-activating protein 1 OS=Homo sapiens GN=ARHGAP1 PE=1 SV=1	29.1572	11	19	11	1	439	High	High	0.892	-0.17	3.02538e+06	3.39284e+06	0	49.44	11	-0.17	-0.242001	-1.14639	0.125818	2364	0.00675571	FALSE	0.845572
2781	High	Master Protein	Q13505	Metaxin-1 OS=Homo sapiens GN=MTX1 PE=1 SV=2	17.8112	7	16	7	1	466	High	High	0.892	-0.17	595541	667772	0	31.67	7	-0.17	-0.242001	-1.14639	0.125818	2365	0.00674799	FALSE	0.845572
2785	High	Master Protein	Q8N3R9	MAGUK p55 subfamily member 5 OS=Homo sapiens GN=MPP5 PE=1 SV=3	4	2	2	2	1	675	High	High	0.892	-0.17	42703.2	47884.9	0	4.5	2	-0.17	-0.242001	-1.14639	0.125818	2366	0.00674027	FALSE	0.845572
2786	High	Master Protein	Q16739	Ceramide glucosyltransferase OS=Homo sapiens GN=UGCG PE=1 SV=1	6.85279	2	3	2	1	394	High	High	0.892	-0.17	72809.4	81655.1	0	4.31	2	-0.17	-0.242001	-1.14639	0.125818	2367	0.00673255	FALSE	0.845572
2787	High	Master Protein	Q01518	Adenylyl cyclase-associated protein 1 OS=Homo sapiens GN=CAP1 PE=1 SV=5	32.6316	17	26	16	1	475	High	High	0.891	-0.17	4.09802e+06	4.59889e+06	1	56.31	17	-0.17	-0.242001	-1.14639	0.125818	2368	0.00672483	FALSE	0.845572
2788	High	Master Protein	Q9Y277	Voltage-dependent anion-selective channel protein 3 OS=Homo sapiens GN=VDAC3 PE=1 SV=1	55.477	15	48	14	1	283	High	High	0.891	-0.17	1.0351e+07	1.1617e+07	0	151.96	15	-0.17	-0.242001	-1.14639	0.125818	2369	0.00671711	FALSE	0.845572
2789	High	Master Protein	P63104	14-3-3 protein zeta/delta OS=Homo sapiens GN=YWHAZ PE=1 SV=1	69.3878	17	65	13	1	245	High	High	0.891	-0.17	1.06629e+07	1.19703e+07	5	181.33	17	-0.17	-0.242001	-1.14639	0.125818	2370	0.00670939	FALSE	0.845572
2790	High	Master Protein	P54802	Alpha-N-acetylglucosaminidase OS=Homo sapiens GN=NAGLU PE=1 SV=2	14.4011	7	7	7	1	743	High	High	0.891	-0.17	497588	558355	0	12.61	7	-0.17	-0.242001	-1.14639	0.125818	2371	0.00670167	FALSE	0.845572
2791	High	Master Protein	Q15599	Na(+)/H(+) exchange regulatory cofactor NHE-RF2 OS=Homo sapiens GN=SLC9A3R2 PE=1 SV=2	11.276	4	6	4	1	337	High	High	0.891	-0.17	143314	160785	0	7.92	4	-0.17	-0.242001	-1.14639	0.125818	2372	0.00669395	FALSE	0.845572
2792	High	Master Protein	O00194	Ras-related protein Rab-27B OS=Homo sapiens GN=RAB27B PE=1 SV=4	22.0183	5	8	4	1	218	High	High	0.891	-0.17	604653	678730	0	16.67	5	-0.17	-0.242001	-1.14639	0.125818	2373	0.00668623	FALSE	0.845572
2793	High	Master Protein	P61803	Dolichyl-diphosphooligosaccharide--protein glycosyltransferase subunit DAD1 OS=Homo sapiens GN=DAD1 PE=1 SV=3	26.5487	3	6	3	1	113	High	High	0.891	-0.17	452114	507268	0	9.37	3	-0.17	-0.242001	-1.14639	0.125818	2374	0.00667851	FALSE	0.845572
2794	High	Master Protein	Q9NUQ9	Protein FAM49B OS=Homo sapiens GN=FAM49B PE=1 SV=1	11.4198	2	3	2	1	324	High	High	0.891	-0.17	64431.1	72298.6	0	8.89	2	-0.17	-0.242001	-1.14639	0.125818	2375	0.00667078	FALSE	0.845572
2795	High	Master Protein	Q15257	Serine/threonine-protein phosphatase 2A activator OS=Homo sapiens GN=PTPA PE=1 SV=3	5.58659	2	3	2	1	358	High	High	0.891	-0.17	286838	321818	0	6.42	2	-0.17	-0.242001	-1.14639	0.125818	2376	0.00666306	FALSE	0.845572
2796	High	Master Protein	Q9Y487	V-type proton ATPase 116 kDa subunit a isoform 2 OS=Homo sapiens GN=ATP6V0A2 PE=1 SV=2	3.15421	3	3	2	1	856	High	High	0.891	-0.17	154468	173383	0	6.29	3	-0.17	-0.242001	-1.14639	0.125818	2377	0.00665534	FALSE	0.845572
2797	High	Master Protein	P51572	B-cell receptor-associated protein 31 OS=Homo sapiens GN=BCAP31 PE=1 SV=3	56.9106	23	97	23	1	246	High	High	0.89	-0.17	2.17897e+07	2.44818e+07	0	189.39	23	-0.17	-0.242001	-1.14639	0.125818	2378	0.00664762	FALSE	0.845572
2798	High	Master Protein	Q16555	Dihydropyrimidinase-related protein 2 OS=Homo sapiens GN=DPYSL2 PE=1 SV=1	45.8042	17	40	17	1	572	High	High	0.89	-0.17	2.96569e+06	3.33105e+06	0	122.94	17	-0.17	-0.242001	-1.14639	0.125818	2379	0.0066399	FALSE	0.845572
2799	High	Master Protein	O95302	Peptidyl-prolyl cis-trans isomerase FKBP9 OS=Homo sapiens GN=FKBP9 PE=1 SV=2	14.0351	8	12	8	1	570	High	High	0.89	-0.17	1.70359e+06	1.91391e+06	0	34.03	8	-0.17	-0.242001	-1.14639	0.125818	2380	0.00663218	FALSE	0.845572
2800	High	Master Protein	O00217	NADH dehydrogenase [ubiquinone] iron-sulfur protein 8, mitochondrial OS=Homo sapiens GN=NDUFS8 PE=1 SV=1	21.4286	4	10	4	1	210	High	High	0.89	-0.17	884816	993810	0	32.61	4	-0.17	-0.242001	-1.14639	0.125818	2381	0.00662446	FALSE	0.845572
2801	High	Master Protein	P10606	Cytochrome c oxidase subunit 5B, mitochondrial OS=Homo sapiens GN=COX5B PE=1 SV=2	20.9302	3	9	3	1	129	High	High	0.89	-0.17	4.34119e+06	4.87523e+06	0	18.67	3	-0.17	-0.242001	-1.14639	0.125818	2382	0.00661674	FALSE	0.845572
2802	High	Master Protein	P46821	Microtubule-associated protein 1B OS=Homo sapiens GN=MAP1B PE=1 SV=2	0.729335	2	3	2	1	2468	High	High	0.89	-0.17	243844	273929	0	3.57	2	-0.17	-0.242001	-1.14639	0.125818	2383	0.00660902	FALSE	0.845572
2803	High	Master Protein	Q96EE3	Nucleoporin SEH1 OS=Homo sapiens GN=SEH1L PE=1 SV=3	10.2778	2	3	2	1	360	High	High	0.89	-0.17	46737.8	52534.3	0	8.16	2	-0.17	-0.242001	-1.14639	0.125818	2384	0.0066013	FALSE	0.845572
2804	High	Master Protein	Q13084	39S ribosomal protein L28, mitochondrial OS=Homo sapiens GN=MRPL28 PE=1 SV=4	9.76562	2	3	2	1	256	High	High	0.89	-0.17	80915	90884	0	2.92	2	-0.17	-0.242001	-1.14639	0.125818	2385	0.00659358	FALSE	0.845572
2805	High	Master Protein	Q16881	Thioredoxin reductase 1, cytoplasmic OS=Homo sapiens GN=TXNRD1 PE=1 SV=3	24.037	15	24	14	1	649	High	High	0.889	-0.17	3.99737e+06	4.49471e+06	1	68.92	15	-0.17	-0.242001	-1.14639	0.125818	2386	0.00658586	FALSE	0.845572
2806	High	Master Protein	O14879	Interferon-induced protein with tetratricopeptide repeats 3 OS=Homo sapiens GN=IFIT3 PE=1 SV=1	23.8776	10	15	10	1	490	High	High	0.889	-0.17	1.28171e+06	1.4413e+06	0	35.38	10	-0.17	-0.242001	-1.14639	0.125818	2387	0.00657813	FALSE	0.845572
2807	High	Master Protein	P50395	Rab GDP dissociation inhibitor beta OS=Homo sapiens GN=GDI2 PE=1 SV=2	40.2247	14	26	9	1	445	High	High	0.889	-0.17	3.95398e+06	4.44661e+06	5	64.01	14	-0.17	-0.242001	-1.14639	0.125818	2388	0.00657041	FALSE	0.845572
2808	High	Master Protein	Q00059	Transcription factor A, mitochondrial OS=Homo sapiens GN=TFAM PE=1 SV=1	27.2358	9	13	9	1	246	High	High	0.889	-0.17	4.60059e+06	5.17772e+06	0	21.49	9	-0.17	-0.242001	-1.14639	0.125818	2389	0.00656269	FALSE	0.845572
2809	High	Master Protein	Q9Y3R5	Protein dopey-2 OS=Homo sapiens GN=DOPEY2 PE=1 SV=5	1.82768	3	4	3	1	2298	High	High	0.889	-0.17	170432	191748	0	12.83	3	-0.17	-0.242001	-1.14639	0.125818	2390	0.00655497	FALSE	0.845572
2810	High	Master Protein	P30040	Endoplasmic reticulum resident protein 29 OS=Homo sapiens GN=ERP29 PE=1 SV=4	40.2299	11	51	11	1	261	High	High	0.888	-0.17	6.83483e+06	7.69597e+06	0	105.65	11	-0.17	-0.242001	-1.14639	0.125818	2391	0.00654725	FALSE	0.845572
2811	High	Master Protein	P09913	Interferon-induced protein with tetratricopeptide repeats 2 OS=Homo sapiens GN=IFIT2 PE=1 SV=1	25.2119	12	17	11	1	472	High	High	0.888	-0.17	827819	931782	0	27.1	12	-0.17	-0.242001	-1.14639	0.125818	2392	0.00653953	FALSE	0.845572
2812	High	Master Protein	Q9BR76	Coronin-1B OS=Homo sapiens GN=CORO1B PE=1 SV=1	12.6789	6	8	6	1	489	High	High	0.888	-0.17	2.33741e+06	2.63219e+06	0	16.33	6	-0.17	-0.242001	-1.14639	0.125818	2393	0.00653181	FALSE	0.845572
2813	High	Master Protein	Q08426	Peroxisomal bifunctional enzyme OS=Homo sapiens GN=EHHADH PE=1 SV=3	7.60719	5	7	5	1	723	High	High	0.888	-0.17	327511	368952	0	6.82	5	-0.17	-0.242001	-1.14639	0.125818	2394	0.00652409	FALSE	0.845572
2814	High	Master Protein	P04040	Catalase OS=Homo sapiens GN=CAT PE=1 SV=3	27.8937	16	40	16	1	527	High	High	0.887	-0.17	5.60204e+06	6.31782e+06	0	102.03	16	-0.17	-0.242001	-1.14639	0.125818	2395	0.00651637	FALSE	0.845572
2815	High	Master Protein	Q13137	Calcium-binding and coiled-coil domain-containing protein 2 OS=Homo sapiens GN=CALCOCO2 PE=1 SV=1	19.7309	9	10	9	1	446	High	High	0.887	-0.17	773398	872091	0	17.07	9	-0.17	-0.242001	-1.14639	0.125818	2396	0.00650865	FALSE	0.845572
2816	High	Master Protein	O14949	Cytochrome b-c1 complex subunit 8 OS=Homo sapiens GN=UQCRQ PE=1 SV=4	13.4146	3	10	3	1	82	High	High	0.887	-0.17	1.80436e+06	2.03345e+06	0	19.53	3	-0.17	-0.242001	-1.14639	0.125818	2397	0.00650093	FALSE	0.845572
2817	High	Master Protein	P62166	Neuronal calcium sensor 1 OS=Homo sapiens GN=NCS1 PE=1 SV=2	19.4737	3	3	3	1	190	High	High	0.887	-0.17	267596	301604	0	6.75	3	-0.17	-0.242001	-1.14639	0.125818	2398	0.00649321	FALSE	0.845572
2819	High	Master Protein	Q9H061	Transmembrane protein 126A OS=Homo sapiens GN=TMEM126A PE=1 SV=1	49.7436	7	12	7	1	195	High	High	0.886	-0.17	1.41112e+06	1.59296e+06	0	30.13	7	-0.17	-0.242001	-1.14639	0.125818	2399	0.00648548	FALSE	0.845572
2821	High	Master Protein	Q9NQR4	Omega-amidase NIT2 OS=Homo sapiens GN=NIT2 PE=1 SV=1	9.78261	4	6	4	1	276	High	High	0.886	-0.17	1.00012e+06	1.12857e+06	0	13.19	4	-0.17	-0.242001	-1.14639	0.125818	2400	0.00647776	FALSE	0.845572
2823	High	Master Protein	P62857	40S ribosomal protein S28 OS=Homo sapiens GN=RPS28 PE=1 SV=1	36.2319	3	7	3	1	69	High	High	0.886	-0.17	171284	193301	0	8.29	3	-0.17	-0.242001	-1.14639	0.125818	2401	0.00647004	FALSE	0.845572
2824	High	Master Protein	P53801	Pituitary tumor-transforming gene 1 protein-interacting protein OS=Homo sapiens GN=PTTG1IP PE=1 SV=1	17.7778	3	7	3	1	180	High	High	0.886	-0.17	1.11727e+06	1.26071e+06	0	12.56	3	-0.17	-0.242001	-1.14639	0.125818	2402	0.00646232	FALSE	0.845572
2752	High	Master Protein	P40939	Trifunctional enzyme subunit alpha, mitochondrial OS=Homo sapiens GN=HADHA PE=1 SV=2	52.5557	35	110	35	1	763	High	High	0.898	-0.16	1.74347e+07	1.94148e+07	0	340.61	35	-0.16	-0.232001	-1.0994	0.135797	2307	0.0071958	FALSE	0.851453
2755	High	Master Protein	P22413	Ectonucleotide pyrophosphatase/phosphodiesterase family member 1 OS=Homo sapiens GN=ENPP1 PE=1 SV=2	2.59459	3	3	3	1	925	High	High	0.898	-0.16	495992	552628	0	4.67	3	-0.16	-0.232001	-1.0994	0.135797	2308	0.00718808	FALSE	0.851453
2756	High	Master Protein	Q9Y4W6	AFG3-like protein 2 OS=Homo sapiens GN=AFG3L2 PE=1 SV=2	34.8808	31	65	30	1	797	High	High	0.897	-0.16	1.09058e+07	1.21613e+07	1	141.94	31	-0.16	-0.232001	-1.0994	0.135797	2309	0.00718036	FALSE	0.851453
2757	High	Master Protein	P62258	14-3-3 protein epsilon OS=Homo sapiens GN=YWHAE PE=1 SV=1	52.9412	14	36	11	1	255	High	High	0.897	-0.16	3.04371e+06	3.39335e+06	0	92.67	14	-0.16	-0.232001	-1.0994	0.135797	2310	0.00717264	FALSE	0.851453
2758	High	Master Protein	Q15907	Ras-related protein Rab-11B OS=Homo sapiens GN=RAB11B PE=1 SV=4	48.1651	10	23	10	1	218	High	High	0.897	-0.16	4.62657e+06	5.15571e+06	0	56.01	10	-0.16	-0.232001	-1.0994	0.135797	2311	0.00716492	FALSE	0.851453
2759	High	Master Protein	Q16706	Alpha-mannosidase 2 OS=Homo sapiens GN=MAN2A1 PE=1 SV=2	11.2762	12	20	10	1	1144	High	High	0.897	-0.16	1.76982e+06	1.97201e+06	2	29.15	12	-0.16	-0.232001	-1.0994	0.135797	2312	0.0071572	FALSE	0.851453
2760	High	Master Protein	Q06124	Tyrosine-protein phosphatase non-receptor type 11 OS=Homo sapiens GN=PTPN11 PE=1 SV=2	11.7253	6	10	6	1	597	High	High	0.897	-0.16	345127	384741	0	15.11	6	-0.16	-0.232001	-1.0994	0.135797	2313	0.00714947	FALSE	0.851453
2761	High	Master Protein	O95336	6-phosphogluconolactonase OS=Homo sapiens GN=PGLS PE=1 SV=2	10.8527	3	4	3	1	258	High	High	0.896	-0.16	598354	667903	0	10.28	3	-0.16	-0.232001	-1.0994	0.135797	2314	0.00714175	FALSE	0.851453
2762	High	Master Protein	Q9ULS5	Transmembrane and coiled-coil domain protein 3 OS=Homo sapiens GN=TMCC3 PE=2 SV=3	7.54717	2	2	2	1	477	High	High	0.896	-0.16	12020.4	13417.1	0	0	2	-0.16	-0.232001	-1.0994	0.135797	2315	0.00713403	FALSE	0.851453
2763	High	Master Protein	Q9BYT8	Neurolysin, mitochondrial OS=Homo sapiens GN=NLN PE=1 SV=1	12.2159	7	9	7	1	704	High	High	0.895	-0.16	301455	336944	0	9.05	7	-0.16	-0.232001	-1.0994	0.135797	2316	0.00712631	FALSE	0.851453
2764	High	Master Protein	O95817	BAG family molecular chaperone regulator 3 OS=Homo sapiens GN=BAG3 PE=1 SV=3	4.86957	3	3	3	1	575	High	High	0.895	-0.16	132518	148055	0	8.43	3	-0.16	-0.232001	-1.0994	0.135797	2317	0.00711859	FALSE	0.851453
2765	High	Master Protein	P29323	Ephrin type-B receptor 2 OS=Homo sapiens GN=EPHB2 PE=1 SV=5	4.17062	4	5	2	1	1055	High	High	0.895	-0.16	107235	119761	0	16.05	4	-0.16	-0.232001	-1.0994	0.135797	2318	0.00711087	FALSE	0.851453
2766	High	Master Protein	Q9NRY6	Phospholipid scramblase 3 OS=Homo sapiens GN=PLSCR3 PE=1 SV=2	7.79661	2	2	2	1	295	High	High	0.895	-0.16	98825.7	110466	0	2.77	2	-0.16	-0.232001	-1.0994	0.135797	2319	0.00710315	FALSE	0.851453
2767	High	Master Protein	Q9Y6A9	Signal peptidase complex subunit 1 OS=Homo sapiens GN=SPCS1 PE=1 SV=4	16.6667	2	4	2	1	102	High	High	0.895	-0.16	281553	314592	0	13.13	2	-0.16	-0.232001	-1.0994	0.135797	2320	0.00709543	FALSE	0.851453
2768	High	Master Protein	O75923	Dysferlin OS=Homo sapiens GN=DYSF PE=1 SV=1	7.59615	14	26	12	1	2080	High	High	0.894	-0.16	862959	965670	0	47.93	14	-0.16	-0.232001	-1.0994	0.135797	2321	0.00708771	FALSE	0.851453
2769	High	Master Protein	P20645	Cation-dependent mannose-6-phosphate receptor OS=Homo sapiens GN=M6PR PE=1 SV=1	27.0758	7	19	7	1	277	High	High	0.894	-0.16	2.09874e+06	2.34814e+06	0	29.31	7	-0.16	-0.232001	-1.0994	0.135797	2322	0.00707999	FALSE	0.851453
2770	High	Master Protein	P68036	Ubiquitin-conjugating enzyme E2 L3 OS=Homo sapiens GN=UBE2L3 PE=1 SV=1	44.8052	5	9	4	1	154	High	High	0.894	-0.16	393866	440740	0	33.75	5	-0.16	-0.232001	-1.0994	0.135797	2323	0.00707227	FALSE	0.851453
2771	High	Master Protein	Q7Z4W1	L-xylulose reductase OS=Homo sapiens GN=DCXR PE=1 SV=2	23.3607	4	7	4	1	244	High	High	0.894	-0.16	711282	795208	0	16.43	4	-0.16	-0.232001	-1.0994	0.135797	2324	0.00706455	FALSE	0.851453
2772	High	Master Protein	O14684	Prostaglandin E synthase OS=Homo sapiens GN=PTGES PE=1 SV=2	12.5	3	5	3	1	152	High	High	0.894	-0.16	1.65585e+06	1.85192e+06	0	12.25	3	-0.16	-0.232001	-1.0994	0.135797	2325	0.00705683	FALSE	0.851453
2773	High	Master Protein	P37173	TGF-beta receptor type-2 OS=Homo sapiens GN=TGFBR2 PE=1 SV=2	5.82011	2	2	2	1	567	High	High	0.894	-0.16	38977.9	43590.9	0	6.36	2	-0.16	-0.232001	-1.0994	0.135797	2326	0.0070491	FALSE	0.851453
2774	High	Master Protein	Q13405	39S ribosomal protein L49, mitochondrial OS=Homo sapiens GN=MRPL49 PE=1 SV=1	30.7229	5	8	5	1	166	High	High	0.893	-0.16	322500	361215	0	14.59	5	-0.16	-0.232001	-1.0994	0.135797	2327	0.00704138	FALSE	0.851453
2775	High	Master Protein	Q9BQK8	Phosphatidate phosphatase LPIN3 OS=Homo sapiens GN=LPIN3 PE=1 SV=3	4.11281	3	3	3	1	851	High	High	0.893	-0.16	24690.4	27634.2	0	4.42	3	-0.16	-0.232001	-1.0994	0.135797	2328	0.00703366	FALSE	0.851453
2776	High	Master Protein	Q9Y672	Dolichyl pyrophosphate Man9GlcNAc2 alpha-1,3-glucosyltransferase OS=Homo sapiens GN=ALG6 PE=1 SV=1	5.71992	3	6	3	1	507	High	High	0.893	-0.16	393810	441013	0	12.39	3	-0.16	-0.232001	-1.0994	0.135797	2329	0.00702594	FALSE	0.851453
2777	High	Master Protein	Q13444	Disintegrin and metalloproteinase domain-containing protein 15 OS=Homo sapiens GN=ADAM15 PE=1 SV=4	1.96987	2	2	2	1	863	High	High	0.893	-0.16	51103.8	57258.4	0	0	2	-0.16	-0.232001	-1.0994	0.135797	2330	0.00701822	FALSE	0.851453
2778	High	Master Protein	Q6WCQ1	Myosin phosphatase Rho-interacting protein OS=Homo sapiens GN=MPRIP PE=1 SV=3	3.12195	2	2	2	1	1025	High	High	0.893	-0.16	51803.9	58009.3	0	4.4	2	-0.16	-0.232001	-1.0994	0.135797	2331	0.0070105	FALSE	0.851453
2779	High	Master Protein	P31040	Succinate dehydrogenase [ubiquinone] flavoprotein subunit, mitochondrial OS=Homo sapiens GN=SDHA PE=1 SV=2	28.3133	16	44	16	1	664	High	High	0.892	-0.16	6.74371e+06	7.55988e+06	0	104.85	16	-0.16	-0.232001	-1.0994	0.135797	2332	0.00700278	FALSE	0.851453
2782	High	Master Protein	Q9HAV0	Guanine nucleotide-binding protein subunit beta-4 OS=Homo sapiens GN=GNB4 PE=1 SV=3	29.4118	9	25	5	1	340	High	High	0.892	-0.16	421812	472851	0	66.15	9	-0.16	-0.232001	-1.0994	0.135797	2333	0.00699506	FALSE	0.851453
2783	High	Master Protein	P10619	Lysosomal protective protein OS=Homo sapiens GN=CTSA PE=1 SV=2	12.0833	5	9	5	1	480	High	High	0.892	-0.16	893798	1.00149e+06	0	23.25	5	-0.16	-0.232001	-1.0994	0.135797	2334	0.00698734	FALSE	0.851453
2784	High	Master Protein	Q14554	Protein disulfide-isomerase A5 OS=Homo sapiens GN=PDIA5 PE=1 SV=1	9.82659	4	4	4	1	519	High	High	0.892	-0.16	176412	197707	0	7.02	4	-0.16	-0.232001	-1.0994	0.135797	2335	0.00697962	FALSE	0.851453
2718	High	Master Protein	Q99623	Prohibitin-2 OS=Homo sapiens GN=PHB2 PE=1 SV=2	75.2508	23	110	23	1	299	High	High	0.904	-0.15	5.39565e+07	5.96917e+07	0	309.05	23	-0.15	-0.222001	-1.05241	0.146305	2227	0.00781347	FALSE	0.857375
2719	High	Master Protein	P21912	Succinate dehydrogenase [ubiquinone] iron-sulfur subunit, mitochondrial OS=Homo sapiens GN=SDHB PE=1 SV=3	53.9286	16	29	16	1	280	High	High	0.904	-0.15	5.55357e+06	6.1455e+06	0	71.48	16	-0.15	-0.222001	-1.05241	0.146305	2228	0.00780574	FALSE	0.857375
2720	High	Master Protein	P53007	Tricarboxylate transport protein, mitochondrial OS=Homo sapiens GN=SLC25A1 PE=1 SV=2	42.7653	11	43	11	1	311	High	High	0.904	-0.15	9.97956e+06	1.10451e+07	0	156.71	11	-0.15	-0.222001	-1.05241	0.146305	2229	0.00779802	FALSE	0.857375
2721	High	Master Protein	Q15526	Surfeit locus protein 1 OS=Homo sapiens GN=SURF1 PE=1 SV=1	25.3333	5	8	5	1	300	High	High	0.904	-0.15	696296	770155	0	24.16	5	-0.15	-0.222001	-1.05241	0.146305	2230	0.0077903	FALSE	0.857375
2722	High	Master Protein	Q86WV6	Stimulator of interferon genes protein OS=Homo sapiens GN=TMEM173 PE=1 SV=1	12.4011	4	6	4	1	379	High	High	0.904	-0.15	409322	452991	0	9.58	4	-0.15	-0.222001	-1.05241	0.146305	2231	0.00778258	FALSE	0.857375
2723	High	Master Protein	O15498	Synaptobrevin homolog YKT6 OS=Homo sapiens GN=YKT6 PE=1 SV=1	12.1212	3	7	3	1	198	High	High	0.904	-0.15	814292	901180	0	14.85	3	-0.15	-0.222001	-1.05241	0.146305	2232	0.00777486	FALSE	0.857375
2724	High	Master Protein	P28070	Proteasome subunit beta type-4 OS=Homo sapiens GN=PSMB4 PE=1 SV=4	9.09091	2	3	2	1	264	High	High	0.904	-0.15	685330	758319	0	8.65	2	-0.15	-0.222001	-1.05241	0.146305	2233	0.00776714	FALSE	0.857375
2725	High	Master Protein	Q9BVG4	Protein PBDC1 OS=Homo sapiens GN=PBDC1 PE=1 SV=1	9.01288	2	2	2	1	233	High	High	0.904	-0.15	106272	117549	0	3.86	2	-0.15	-0.222001	-1.05241	0.146305	2234	0.00775942	FALSE	0.857375
2726	High	Master Protein	Q9NQ50	39S ribosomal protein L40, mitochondrial OS=Homo sapiens GN=MRPL40 PE=1 SV=1	16.9903	2	3	2	1	206	High	High	0.904	-0.15	49859.7	55155.6	0	4.13	2	-0.15	-0.222001	-1.05241	0.146305	2235	0.0077517	FALSE	0.857375
2727	High	Master Protein	Q14764	Major vault protein OS=Homo sapiens GN=MVP PE=1 SV=4	47.9283	35	88	35	1	893	High	High	0.903	-0.15	6.60109e+06	7.30723e+06	0	216.11	35	-0.15	-0.222001	-1.05241	0.146305	2236	0.00774398	FALSE	0.857375
2728	High	Master Protein	Q8NF37	Lysophosphatidylcholine acyltransferase 1 OS=Homo sapiens GN=LPCAT1 PE=1 SV=2	17.2285	10	15	10	1	534	High	High	0.903	-0.15	1.38767e+06	1.5361e+06	0	33.21	10	-0.15	-0.222001	-1.05241	0.146305	2237	0.00773626	FALSE	0.857375
2729	High	Master Protein	Q8TAA9	Vang-like protein 1 OS=Homo sapiens GN=VANGL1 PE=1 SV=1	9.35115	5	7	5	1	524	High	High	0.903	-0.15	440410	487687	0	23.59	5	-0.15	-0.222001	-1.05241	0.146305	2238	0.00772854	FALSE	0.857375
2730	High	Master Protein	Q08378	Golgin subfamily A member 3 OS=Homo sapiens GN=GOLGA3 PE=1 SV=2	2.93725	4	6	4	1	1498	High	High	0.903	-0.15	62528.8	69273	0	10.91	4	-0.15	-0.222001	-1.05241	0.146305	2239	0.00772082	FALSE	0.857375
2731	High	Master Protein	Q8NBL1	Protein O-glucosyltransferase 1 OS=Homo sapiens GN=POGLUT1 PE=1 SV=1	11.4796	4	5	4	1	392	High	High	0.903	-0.15	190399	210958	0	12.14	4	-0.15	-0.222001	-1.05241	0.146305	2240	0.00771309	FALSE	0.857375
2732	High	Master Protein	Q92845	Kinesin-associated protein 3 OS=Homo sapiens GN=KIFAP3 PE=1 SV=2	4.0404	2	2	2	1	792	High	High	0.903	-0.15	13249.8	14676.4	0	0	2	-0.15	-0.222001	-1.05241	0.146305	2241	0.00770537	FALSE	0.857375
2733	High	Master Protein	Q9NUT2	ATP-binding cassette sub-family B member 8, mitochondrial OS=Homo sapiens GN=ABCB8 PE=1 SV=3	2.04082	2	3	2	1	735	High	High	0.903	-0.15	55276.2	61209.4	0	3.51	2	-0.15	-0.222001	-1.05241	0.146305	2242	0.00769765	FALSE	0.857375
2734	High	Master Protein	Q14254	Flotillin-2 OS=Homo sapiens GN=FLOT2 PE=1 SV=2	60.0467	28	68	28	1	428	High	High	0.902	-0.15	7.81765e+06	8.66643e+06	0	168.76	28	-0.15	-0.222001	-1.05241	0.146305	2243	0.00768993	FALSE	0.857375
2735	High	Master Protein	O14964	Hepatocyte growth factor-regulated tyrosine kinase substrate OS=Homo sapiens GN=HGS PE=1 SV=1	14.5431	11	17	11	1	777	High	High	0.902	-0.15	1.35046e+06	1.49725e+06	0	30.66	11	-0.15	-0.222001	-1.05241	0.146305	2244	0.00768221	FALSE	0.857375
2736	High	Master Protein	Q9Y4K0	Lysyl oxidase homolog 2 OS=Homo sapiens GN=LOXL2 PE=1 SV=1	9.43152	6	7	6	1	774	High	High	0.902	-0.15	655804	727250	0	20.19	6	-0.15	-0.222001	-1.05241	0.146305	2245	0.00767449	FALSE	0.857375
2737	High	Master Protein	Q86SR1	Polypeptide N-acetylgalactosaminyltransferase 10 OS=Homo sapiens GN=GALNT10 PE=1 SV=2	7.29685	3	3	3	1	603	High	High	0.902	-0.15	82724.6	91670.2	0	0	3	-0.15	-0.222001	-1.05241	0.146305	2246	0.00766677	FALSE	0.857375
2738	High	Master Protein	P49902	Cytosolic purine 5'-nucleotidase OS=Homo sapiens GN=NT5C2 PE=1 SV=1	8.02139	3	8	3	1	561	High	High	0.902	-0.15	233398	258754	0	19.19	3	-0.15	-0.222001	-1.05241	0.146305	2247	0.00765905	FALSE	0.857375
2739	High	Master Protein	Q9NY35	Claudin domain-containing protein 1 OS=Homo sapiens GN=CLDND1 PE=1 SV=1	9.09091	2	3	2	1	253	High	High	0.902	-0.15	166500	184666	0	4.3	2	-0.15	-0.222001	-1.05241	0.146305	2248	0.00765133	FALSE	0.857375
2740	High	Master Protein	Q99614	Tetratricopeptide repeat protein 1 OS=Homo sapiens GN=TTC1 PE=1 SV=1	6.50685	2	2	2	1	292	High	High	0.902	-0.15	126998	140775	0	0	2	-0.15	-0.222001	-1.05241	0.146305	2249	0.00764361	FALSE	0.857375
2741	High	Master Protein	Q9BV20	Methylthioribose-1-phosphate isomerase OS=Homo sapiens GN=MRI1 PE=1 SV=1	5.69106	2	2	2	1	369	High	High	0.902	-0.15	127294	141139	0	4.15	2	-0.15	-0.222001	-1.05241	0.146305	2250	0.00763589	FALSE	0.857375
2742	High	Master Protein	P22695	Cytochrome b-c1 complex subunit 2, mitochondrial OS=Homo sapiens GN=UQCRC2 PE=1 SV=3	41.7219	16	62	16	1	453	High	High	0.901	-0.15	2.02763e+07	2.25154e+07	0	193.54	16	-0.15	-0.222001	-1.05241	0.146305	2251	0.00762817	FALSE	0.857375
2743	High	Master Protein	P01034	Cystatin-C OS=Homo sapiens GN=CST3 PE=1 SV=1	30.8219	4	12	4	1	146	High	High	0.901	-0.15	794197	881318	0	28.52	4	-0.15	-0.222001	-1.05241	0.146305	2252	0.00762044	FALSE	0.857375
2744	High	Master Protein	O95810	Caveolae-associated protein 2 OS=Homo sapiens GN=CAVIN2 PE=1 SV=3	12.9412	4	8	4	1	425	High	High	0.901	-0.15	703054	780330	0	30.03	4	-0.15	-0.222001	-1.05241	0.146305	2253	0.00761272	FALSE	0.857375
2745	High	Master Protein	Q9H1E5	Thioredoxin-related transmembrane protein 4 OS=Homo sapiens GN=TMX4 PE=1 SV=1	9.74212	3	5	3	1	349	High	High	0.901	-0.15	328208	364257	0	6.82	3	-0.15	-0.222001	-1.05241	0.146305	2254	0.007605	FALSE	0.857375
2746	High	Master Protein	Q8IUH4	Palmitoyltransferase ZDHHC13 OS=Homo sapiens GN=ZDHHC13 PE=1 SV=3	6.10932	3	3	3	1	622	High	High	0.901	-0.15	96455.4	107058	0	2.78	3	-0.15	-0.222001	-1.05241	0.146305	2255	0.00759728	FALSE	0.857375
2747	High	Master Protein	Q8TBA6	Golgin subfamily A member 5 OS=Homo sapiens GN=GOLGA5 PE=1 SV=3	4.24077	2	2	2	1	731	High	High	0.901	-0.15	24879	27613.4	0	2.41	2	-0.15	-0.222001	-1.05241	0.146305	2256	0.00758956	FALSE	0.857375
2748	High	Master Protein	P30740	Leukocyte elastase inhibitor OS=Homo sapiens GN=SERPINB1 PE=1 SV=1	22.4274	8	10	7	1	379	High	High	0.899	-0.15	996234	1.10841e+06	1	27.99	8	-0.15	-0.222001	-1.05241	0.146305	2257	0.00758184	FALSE	0.857375
2749	High	Master Protein	O00754	Lysosomal alpha-mannosidase OS=Homo sapiens GN=MAN2B1 PE=1 SV=3	4.35213	3	4	3	1	1011	High	High	0.899	-0.15	171694	190882	0	3.32	3	-0.15	-0.222001	-1.05241	0.146305	2258	0.00757412	FALSE	0.857375
2750	High	Master Protein	Q9NZ45	CDGSH iron-sulfur domain-containing protein 1 OS=Homo sapiens GN=CISD1 PE=1 SV=1	30.5556	3	16	3	1	108	High	High	0.899	-0.15	1.33143e+06	1.48021e+06	0	47.05	3	-0.15	-0.222001	-1.05241	0.146305	2259	0.0075664	FALSE	0.857375
2751	High	Master Protein	P00491	Purine nucleoside phosphorylase OS=Homo sapiens GN=PNP PE=1 SV=2	9.34256	2	2	2	1	289	High	High	0.899	-0.15	118853	132209	0	2.39	2	-0.15	-0.222001	-1.05241	0.146305	2260	0.00755868	FALSE	0.857375
2753	High	Master Protein	P29401	Transketolase OS=Homo sapiens GN=TKT PE=1 SV=3	30.1766	17	34	17	1	623	High	High	0.898	-0.15	7.34386e+06	8.1764e+06	0	80.78	17	-0.15	-0.222001	-1.05241	0.146305	2261	0.00755096	FALSE	0.857375
2754	High	Master Protein	Q04721	Neurogenic locus notch homolog protein 2 OS=Homo sapiens GN=NOTCH2 PE=1 SV=3	3.72319	5	6	5	1	2471	High	High	0.898	-0.15	86462.7	96241.7	0	6.67	5	-0.15	-0.222001	-1.05241	0.146305	2262	0.00754324	FALSE	0.857375
2674	High	Master Protein	Q9UI09	NADH dehydrogenase [ubiquinone] 1 alpha subcomplex subunit 12 OS=Homo sapiens GN=NDUFA12 PE=1 SV=1	14.4828	3	4	3	1	145	High	High	0.911	-0.14	1.58197e+06	1.73735e+06	0	7.5	3	-0.14	-0.212001	-1.00543	0.157345	2151	0.00840025	FALSE	0.863339
2677	High	Master Protein	P07954	Fumarate hydratase, mitochondrial OS=Homo sapiens GN=FH PE=1 SV=3	53.1373	19	59	19	1	510	High	High	0.91	-0.14	1.0378e+07	1.14087e+07	0	162.52	19	-0.14	-0.212001	-1.00543	0.157345	2152	0.00839253	FALSE	0.863339
2678	High	Master Protein	Q8TCT9	Minor histocompatibility antigen H13 OS=Homo sapiens GN=HM13 PE=1 SV=1	26.2599	10	32	10	1	377	High	High	0.91	-0.14	5.94951e+06	6.53656e+06	0	58.8	10	-0.14	-0.212001	-1.00543	0.157345	2153	0.00838481	FALSE	0.863339
2679	High	Master Protein	Q9UH65	Switch-associated protein 70 OS=Homo sapiens GN=SWAP70 PE=1 SV=1	14.359	9	10	8	1	585	High	High	0.91	-0.14	756927	831835	1	11.39	9	-0.14	-0.212001	-1.00543	0.157345	2154	0.00837708	FALSE	0.863339
2680	High	Master Protein	P82909	28S ribosomal protein S36, mitochondrial OS=Homo sapiens GN=MRPS36 PE=1 SV=2	36.8932	4	4	4	1	103	High	High	0.91	-0.14	1.29897e+06	1.42733e+06	0	12.79	4	-0.14	-0.212001	-1.00543	0.157345	2155	0.00836936	FALSE	0.863339
2681	High	Master Protein	P04440	HLA class II histocompatibility antigen, DP beta 1 chain OS=Homo sapiens GN=HLA-DPB1 PE=1 SV=1	17.4419	4	8	2	1	258	High	High	0.91	-0.14	205608	225933	1	18.85	4	-0.14	-0.212001	-1.00543	0.157345	2156	0.00836164	FALSE	0.863339
2682	High	Master Protein	P16144	Integrin beta-4 OS=Homo sapiens GN=ITGB4 PE=1 SV=5	12.9528	19	25	19	1	1822	High	High	0.909	-0.14	2.15201e+06	2.36798e+06	0	55.25	19	-0.14	-0.212001	-1.00543	0.157345	2157	0.00835392	FALSE	0.863339
2683	High	Master Protein	P12955	Xaa-Pro dipeptidase OS=Homo sapiens GN=PEPD PE=1 SV=3	15.6187	7	10	7	1	493	High	High	0.909	-0.14	268744	295722	0	21.62	7	-0.14	-0.212001	-1.00543	0.157345	2158	0.0083462	FALSE	0.863339
2684	High	Master Protein	Q14126	Desmoglein-2 OS=Homo sapiens GN=DSG2 PE=1 SV=2	5.99284	5	6	5	1	1118	High	High	0.909	-0.14	172802	190148	0	14.66	5	-0.14	-0.212001	-1.00543	0.157345	2159	0.00833848	FALSE	0.863339
2685	High	Master Protein	Q13555	Calcium/calmodulin-dependent protein kinase type II subunit gamma OS=Homo sapiens GN=CAMK2G PE=1 SV=3	5.91398	3	3	2	1	558	High	High	0.909	-0.14	46348.3	50978.7	0	5.6	3	-0.14	-0.212001	-1.00543	0.157345	2160	0.00833076	FALSE	0.863339
2686	High	Master Protein	O75208	Ubiquinone biosynthesis protein COQ9, mitochondrial OS=Homo sapiens GN=COQ9 PE=1 SV=1	7.86164	2	4	2	1	318	High	High	0.909	-0.14	107911	118766	0	3.84	2	-0.14	-0.212001	-1.00543	0.157345	2161	0.00832304	FALSE	0.863339
2687	High	Master Protein	P04632	Calpain small subunit 1 OS=Homo sapiens GN=CAPNS1 PE=1 SV=1	59.7015	10	21	10	1	268	High	High	0.908	-0.14	5.85465e+06	6.44924e+06	0	58.84	10	-0.14	-0.212001	-1.00543	0.157345	2162	0.00831532	FALSE	0.863339
2688	High	Master Protein	P51858	Hepatoma-derived growth factor OS=Homo sapiens GN=HDGF PE=1 SV=1	23.3333	6	11	6	1	240	High	High	0.908	-0.14	1.36635e+06	1.50463e+06	0	24.46	6	-0.14	-0.212001	-1.00543	0.157345	2163	0.0083076	FALSE	0.863339
2689	High	Master Protein	Q15691	Microtubule-associated protein RP/EB family member 1 OS=Homo sapiens GN=MAPRE1 PE=1 SV=3	33.9552	6	8	6	1	268	High	High	0.908	-0.14	808208	890482	0	25.85	6	-0.14	-0.212001	-1.00543	0.157345	2164	0.00829988	FALSE	0.863339
2690	High	Master Protein	O43747	AP-1 complex subunit gamma-1 OS=Homo sapiens GN=AP1G1 PE=1 SV=5	6.08273	4	8	4	1	822	High	High	0.908	-0.14	283706	312464	0	12.88	4	-0.14	-0.212001	-1.00543	0.157345	2165	0.00829216	FALSE	0.863339
2691	High	Master Protein	P53990	IST1 homolog OS=Homo sapiens GN=IST1 PE=1 SV=1	12.0879	4	5	4	1	364	High	High	0.908	-0.14	756158	832947	0	8.75	4	-0.14	-0.212001	-1.00543	0.157345	2166	0.00828443	FALSE	0.863339
2692	High	Master Protein	Q5T5P2	Sickle tail protein homolog OS=Homo sapiens GN=KIAA1217 PE=1 SV=2	1.64694	3	4	3	1	1943	High	High	0.908	-0.14	162394	178933	0	3.58	3	-0.14	-0.212001	-1.00543	0.157345	2167	0.00827671	FALSE	0.863339
2693	High	Master Protein	Q9H2U2	Inorganic pyrophosphatase 2, mitochondrial OS=Homo sapiens GN=PPA2 PE=1 SV=2	41.9162	11	20	11	1	334	High	High	0.907	-0.14	3.20663e+06	3.53446e+06	0	64.37	11	-0.14	-0.212001	-1.00543	0.157345	2168	0.00826899	FALSE	0.863339
2694	High	Master Protein	Q9H5V8	CUB domain-containing protein 1 OS=Homo sapiens GN=CDCP1 PE=1 SV=3	10.2871	9	16	9	1	836	High	High	0.907	-0.14	3.88332e+06	4.28051e+06	0	43.49	9	-0.14	-0.212001	-1.00543	0.157345	2169	0.00826127	FALSE	0.863339
2695	High	Master Protein	Q05655	Protein kinase C delta type OS=Homo sapiens GN=PRKCD PE=1 SV=2	15.2367	10	16	9	1	676	High	High	0.907	-0.14	648857	715269	0	39.36	10	-0.14	-0.212001	-1.00543	0.157345	2170	0.00825355	FALSE	0.863339
2696	High	Master Protein	P58335	Anthrax toxin receptor 2 OS=Homo sapiens GN=ANTXR2 PE=1 SV=5	6.54397	4	5	4	1	489	High	High	0.907	-0.14	1.29091e+06	1.42394e+06	0	9.51	4	-0.14	-0.212001	-1.00543	0.157345	2171	0.00824583	FALSE	0.863339
2697	High	Master Protein	Q96AE4	Far upstream element-binding protein 1 OS=Homo sapiens GN=FUBP1 PE=1 SV=3	8.07453	5	8	4	1	644	High	High	0.907	-0.14	324799	358042	0	12.93	5	-0.14	-0.212001	-1.00543	0.157345	2172	0.00823811	FALSE	0.863339
2698	High	Master Protein	Q99733	Nucleosome assembly protein 1-like 4 OS=Homo sapiens GN=NAP1L4 PE=1 SV=1	16.8	6	9	4	1	375	High	High	0.907	-0.14	441145	486453	2	18.85	6	-0.14	-0.212001	-1.00543	0.157345	2173	0.00823039	FALSE	0.863339
2699	High	Master Protein	P35611	Alpha-adducin OS=Homo sapiens GN=ADD1 PE=1 SV=2	5.56309	3	4	3	1	737	High	High	0.907	-0.14	209059	230596	0	13.12	3	-0.14	-0.212001	-1.00543	0.157345	2174	0.00822267	FALSE	0.863339
2700	High	Master Protein	Q92692	Nectin-2 OS=Homo sapiens GN=NECTIN2 PE=1 SV=1	5.20446	3	4	3	1	538	High	High	0.907	-0.14	150572	166090	0	3.3	3	-0.14	-0.212001	-1.00543	0.157345	2175	0.00821495	FALSE	0.863339
2701	High	Master Protein	P20618	Proteasome subunit beta type-1 OS=Homo sapiens GN=PSMB1 PE=1 SV=2	13.278	3	5	3	1	241	High	High	0.907	-0.14	607883	670084	0	9.16	3	-0.14	-0.212001	-1.00543	0.157345	2176	0.00820723	FALSE	0.863339
2702	High	Master Protein	O15438	Canalicular multispecific organic anion transporter 2 OS=Homo sapiens GN=ABCC3 PE=1 SV=3	2.55403	3	4	3	1	1527	High	High	0.907	-0.14	162334	178983	0	6.01	3	-0.14	-0.212001	-1.00543	0.157345	2177	0.00819951	FALSE	0.863339
2703	High	Master Protein	Q9NRV9	Heme-binding protein 1 OS=Homo sapiens GN=HEBP1 PE=1 SV=1	9.52381	2	2	2	1	189	High	High	0.907	-0.14	102648	113155	0	4.38	2	-0.14	-0.212001	-1.00543	0.157345	2178	0.00819179	FALSE	0.863339
2704	High	Master Protein	Q5T3F8	CSC1-like protein 2 OS=Homo sapiens GN=TMEM63B PE=1 SV=1	2.04327	2	3	2	1	832	High	High	0.907	-0.14	342486	377808	0	4.34	2	-0.14	-0.212001	-1.00543	0.157345	2179	0.00818406	FALSE	0.863339
2705	High	Master Protein	Q96I51	RCC1-like G exchanging factor-like protein OS=Homo sapiens GN=RCC1L PE=1 SV=2	6.68103	2	3	2	1	464	High	High	0.907	-0.14	78106.3	86123.8	0	11	2	-0.14	-0.212001	-1.00543	0.157345	2180	0.00817634	FALSE	0.863339
2706	High	Master Protein	Q8TAE8	Growth arrest and DNA damage-inducible proteins-interacting protein 1 OS=Homo sapiens GN=GADD45GIP1 PE=1 SV=1	23.4234	6	9	6	1	222	High	High	0.906	-0.14	529317	583932	0	11.02	6	-0.14	-0.212001	-1.00543	0.157345	2181	0.00816862	FALSE	0.863339
2707	High	Master Protein	Q12846	Syntaxin-4 OS=Homo sapiens GN=STX4 PE=1 SV=2	21.2121	6	10	6	1	297	High	High	0.906	-0.14	905893	999338	0	18.98	6	-0.14	-0.212001	-1.00543	0.157345	2182	0.0081609	FALSE	0.863339
2708	High	Master Protein	Q6P1A2	Lysophospholipid acyltransferase 5 OS=Homo sapiens GN=LPCAT3 PE=1 SV=1	9.03491	4	6	4	1	487	High	High	0.906	-0.14	676098	746506	0	16.22	4	-0.14	-0.212001	-1.00543	0.157345	2183	0.00815318	FALSE	0.863339
2709	High	Master Protein	Q8IVB5	LIX1-like protein OS=Homo sapiens GN=LIX1L PE=2 SV=1	6.52819	2	2	2	1	337	High	High	0.906	-0.14	60401.8	66697.9	0	2.66	2	-0.14	-0.212001	-1.00543	0.157345	2184	0.00814546	FALSE	0.863339
2710	High	Master Protein	O95299	NADH dehydrogenase [ubiquinone] 1 alpha subcomplex subunit 10, mitochondrial OS=Homo sapiens GN=NDUFA10 PE=1 SV=1	14.3662	7	13	7	1	355	High	High	0.905	-0.14	1.87617e+06	2.07332e+06	0	30.85	7	-0.14	-0.212001	-1.00543	0.157345	2185	0.00813774	FALSE	0.863339
2711	High	Master Protein	P06737	Glycogen phosphorylase, liver form OS=Homo sapiens GN=PYGL PE=1 SV=4	9.68123	7	12	5	1	847	High	High	0.905	-0.14	687280	759330	0	22.62	7	-0.14	-0.212001	-1.00543	0.157345	2186	0.00813002	FALSE	0.863339
2712	High	Master Protein	P48060	Glioma pathogenesis-related protein 1 OS=Homo sapiens GN=GLIPR1 PE=1 SV=3	11.6541	3	4	3	1	266	High	High	0.905	-0.14	300565	332148	0	4.51	3	-0.14	-0.212001	-1.00543	0.157345	2187	0.0081223	FALSE	0.863339
2713	High	Master Protein	O95197	Reticulon-3 OS=Homo sapiens GN=RTN3 PE=1 SV=2	3.00388	3	8	3	1	1032	High	High	0.905	-0.14	2.10598e+06	2.32723e+06	0	21.92	3	-0.14	-0.212001	-1.00543	0.157345	2188	0.00811458	FALSE	0.863339
2714	High	Master Protein	Q8IZH2	5'-3' exoribonuclease 1 OS=Homo sapiens GN=XRN1 PE=1 SV=1	1.46542	2	2	2	1	1706	High	High	0.905	-0.14	19248.6	21271.6	0	0	2	-0.14	-0.212001	-1.00543	0.157345	2189	0.00810686	FALSE	0.863339
2715	High	Master Protein	Q15646	2'-5'-oligoadenylate synthase-like protein OS=Homo sapiens GN=OASL PE=1 SV=2	4.28016	2	2	2	1	514	High	High	0.905	-0.14	89548	98977	0	0	2	-0.14	-0.212001	-1.00543	0.157345	2190	0.00809914	FALSE	0.863339
2716	High	Master Protein	P05187	Alkaline phosphatase, placental type OS=Homo sapiens GN=ALPP PE=1 SV=2	3.5514	2	2	2	1	535	High	High	0.905	-0.14	22600.8	24979.6	0	0	2	-0.14	-0.212001	-1.00543	0.157345	2191	0.00809141	FALSE	0.863339
2717	High	Master Protein	P49721	Proteasome subunit beta type-2 OS=Homo sapiens GN=PSMB2 PE=1 SV=1	16.4179	3	3	2	1	201	High	High	0.905	-0.14	257512	284498	0	7.68	3	-0.14	-0.212001	-1.00543	0.157345	2192	0.00808369	FALSE	0.863339
2652	High	Master Protein	P30876	DNA-directed RNA polymerase II subunit RPB2 OS=Homo sapiens GN=POLR2B PE=1 SV=1	1.95911	2	2	2	1	1174	High	High	0.917	-0.13	5382.25	5870.83	0	0	2	-0.13	-0.202001	-0.958442	0.16892	2090	0.00887122	FALSE	0.869344
2653	High	Master Protein	P35579	Myosin-9 OS=Homo sapiens GN=MYH9 PE=1 SV=4	61.3265	155	521	132	1	1960	High	High	0.916	-0.13	9.43195e+07	1.0296e+08	24	1217.85	155	-0.13	-0.202001	-0.958442	0.16892	2091	0.0088635	FALSE	0.869344
2654	High	Master Protein	Q8TCJ2	Dolichyl-diphosphooligosaccharide--protein glycosyltransferase subunit STT3B OS=Homo sapiens GN=STT3B PE=1 SV=1	11.3801	11	24	10	1	826	High	High	0.916	-0.13	4.47354e+06	4.88242e+06	1	42.24	11	-0.13	-0.202001	-0.958442	0.16892	2092	0.00885578	FALSE	0.869344
2655	High	Master Protein	P25786	Proteasome subunit alpha type-1 OS=Homo sapiens GN=PSMA1 PE=1 SV=1	31.1787	9	24	9	1	263	High	High	0.916	-0.13	1.67807e+06	1.83195e+06	0	50.28	9	-0.13	-0.202001	-0.958442	0.16892	2093	0.00884805	FALSE	0.869344
2656	High	Master Protein	Q92626	Peroxidasin homolog OS=Homo sapiens GN=PXDN PE=1 SV=2	4.46247	5	6	5	1	1479	High	High	0.916	-0.13	109922	119966	0	8.3	5	-0.13	-0.202001	-0.958442	0.16892	2094	0.00884033	FALSE	0.869344
2657	High	Master Protein	P30041	Peroxiredoxin-6 OS=Homo sapiens GN=PRDX6 PE=1 SV=3	54.9107	15	39	15	1	224	High	High	0.915	-0.13	7.86465e+06	8.59548e+06	0	98.64	15	-0.13	-0.202001	-0.958442	0.16892	2095	0.00883261	FALSE	0.869344
2658	High	Master Protein	P35237	Serpin B6 OS=Homo sapiens GN=SERPINB6 PE=1 SV=3	30.5851	8	11	8	1	376	High	High	0.915	-0.13	2.39098e+06	2.61388e+06	0	30.71	8	-0.13	-0.202001	-0.958442	0.16892	2096	0.00882489	FALSE	0.869344
2659	High	Master Protein	P38571	Lysosomal acid lipase/cholesteryl ester hydrolase OS=Homo sapiens GN=LIPA PE=1 SV=2	14.0351	4	5	4	1	399	High	High	0.915	-0.13	365462	399245	0	9.43	4	-0.13	-0.202001	-0.958442	0.16892	2097	0.00881717	FALSE	0.869344
2660	High	Master Protein	Q9Y2S7	Polymerase delta-interacting protein 2 OS=Homo sapiens GN=POLDIP2 PE=1 SV=1	6.52174	2	4	2	1	368	High	High	0.915	-0.13	247974	271109	0	11.8	2	-0.13	-0.202001	-0.958442	0.16892	2098	0.00880945	FALSE	0.869344
2661	High	Master Protein	P56134	ATP synthase subunit f, mitochondrial OS=Homo sapiens GN=ATP5J2 PE=1 SV=3	31.9149	3	8	2	1	94	High	High	0.915	-0.13	536842	586871	0	17.79	3	-0.13	-0.202001	-0.958442	0.16892	2099	0.00880173	FALSE	0.869344
2662	High	Master Protein	P11047	Laminin subunit gamma-1 OS=Homo sapiens GN=LAMC1 PE=1 SV=3	17.2157	24	33	24	1	1609	High	High	0.914	-0.13	1.25684e+06	1.37546e+06	0	53.07	24	-0.13	-0.202001	-0.958442	0.16892	2100	0.00879401	FALSE	0.869344
2663	High	Master Protein	O75874	Isocitrate dehydrogenase [NADP] cytoplasmic OS=Homo sapiens GN=IDH1 PE=1 SV=2	22.2222	9	17	9	1	414	High	High	0.914	-0.13	1.37282e+06	1.50129e+06	0	33.35	9	-0.13	-0.202001	-0.958442	0.16892	2101	0.00878629	FALSE	0.869344
2664	High	Master Protein	O75306	NADH dehydrogenase [ubiquinone] iron-sulfur protein 2, mitochondrial OS=Homo sapiens GN=NDUFS2 PE=1 SV=2	23.1102	9	18	9	1	463	High	High	0.914	-0.13	3.82047e+06	4.18153e+06	0	40.57	9	-0.13	-0.202001	-0.958442	0.16892	2102	0.00877857	FALSE	0.869344
2665	High	Master Protein	Q6IBS0	Twinfilin-2 OS=Homo sapiens GN=TWF2 PE=1 SV=2	18.3381	4	4	4	1	349	High	High	0.914	-0.13	120346	131735	0	4.09	4	-0.13	-0.202001	-0.958442	0.16892	2103	0.00877085	FALSE	0.869344
2666	High	Master Protein	O60613	Selenoprotein F OS=Homo sapiens GN=SELENOF PE=1 SV=3	25.3086	3	6	3	1	162	High	High	0.914	-0.13	165636	181244	0	12.95	3	-0.13	-0.202001	-0.958442	0.16892	2104	0.00876313	FALSE	0.869344
2667	High	Master Protein	Q9P253	Vacuolar protein sorting-associated protein 18 homolog OS=Homo sapiens GN=VPS18 PE=1 SV=2	4.72765	3	3	3	1	973	High	High	0.913	-0.13	15403.8	16871.1	0	7.25	3	-0.13	-0.202001	-0.958442	0.16892	2105	0.0087554	FALSE	0.869344
2668	High	Master Protein	Q8NCH0	Carbohydrate sulfotransferase 14 OS=Homo sapiens GN=CHST14 PE=1 SV=2	5.58511	2	2	2	1	376	High	High	0.913	-0.13	80122.8	87755.4	0	1.94	2	-0.13	-0.202001	-0.958442	0.16892	2106	0.00874768	FALSE	0.869344
2669	High	Master Protein	Q13011	Delta(3,5)-Delta(2,4)-dienoyl-CoA isomerase, mitochondrial OS=Homo sapiens GN=ECH1 PE=1 SV=2	52.7439	15	46	15	1	328	High	High	0.912	-0.13	4.49682e+06	4.92986e+06	0	111.3	15	-0.13	-0.202001	-0.958442	0.16892	2107	0.00873996	FALSE	0.869344
2670	High	Master Protein	Q9BXP2	Solute carrier family 12 member 9 OS=Homo sapiens GN=SLC12A9 PE=1 SV=1	3.17287	3	3	3	1	914	High	High	0.912	-0.13	124658	136647	0	5.11	3	-0.13	-0.202001	-0.958442	0.16892	2108	0.00873224	FALSE	0.869344
2671	High	Master Protein	Q8WY22	BRI3-binding protein OS=Homo sapiens GN=BRI3BP PE=1 SV=1	8.36653	2	2	2	1	251	High	High	0.912	-0.13	180101	197425	0	2.32	2	-0.13	-0.202001	-0.958442	0.16892	2109	0.00872452	FALSE	0.869344
2672	High	Master Protein	Q9NR19	Acetyl-coenzyme A synthetase, cytoplasmic OS=Homo sapiens GN=ACSS2 PE=1 SV=1	2.42511	2	4	2	1	701	High	High	0.912	-0.13	135657	148685	0	4.28	2	-0.13	-0.202001	-0.958442	0.16892	2110	0.0087168	FALSE	0.869344
2673	High	Master Protein	Q13867	Bleomycin hydrolase OS=Homo sapiens GN=BLMH PE=1 SV=1	8.79121	3	4	3	1	455	High	High	0.911	-0.13	692533	760421	0	7.71	3	-0.13	-0.202001	-0.958442	0.16892	2111	0.00870908	FALSE	0.869344
2675	High	Master Protein	Q7L7X3	Serine/threonine-protein kinase TAO1 OS=Homo sapiens GN=TAOK1 PE=1 SV=1	3.4965	3	4	2	1	1001	High	High	0.911	-0.13	31580	34667.4	0	9.14	3	-0.13	-0.202001	-0.958442	0.16892	2112	0.00870136	FALSE	0.869344
2676	High	Master Protein	Q8IVS2	Malonyl-CoA-acyl carrier protein transacylase, mitochondrial OS=Homo sapiens GN=MCAT PE=1 SV=2	6.41026	2	2	2	1	390	High	High	0.911	-0.13	21842.6	23972.3	0	5.26	2	-0.13	-0.202001	-0.958442	0.16892	2113	0.00869364	FALSE	0.869344
2613	High	Master Protein	P23528	Cofilin-1 OS=Homo sapiens GN=CFL1 PE=1 SV=3	69.2771	16	61	12	1	166	High	High	0.923	-0.12	1.38204e+07	1.49749e+07	3	185.57	16	-0.12	-0.192001	-0.911456	0.181027	2021	0.00940395	FALSE	0.875391
2614	High	Master Protein	Q92575	UBX domain-containing protein 4 OS=Homo sapiens GN=UBXN4 PE=1 SV=2	6.29921	3	3	3	1	508	High	High	0.923	-0.12	398040	431377	0	5.81	3	-0.12	-0.192001	-0.911456	0.181027	2022	0.00939623	FALSE	0.875391
2615	High	Master Protein	Q13404	Ubiquitin-conjugating enzyme E2 variant 1 OS=Homo sapiens GN=UBE2V1 PE=1 SV=2	22.449	3	3	3	1	147	High	High	0.923	-0.12	449498	486821	0	7.24	3	-0.12	-0.192001	-0.911456	0.181027	2023	0.00938851	FALSE	0.875391
2616	High	Master Protein	Q16891	MICOS complex subunit MIC60 OS=Homo sapiens GN=IMMT PE=1 SV=1	56.2005	49	157	49	1	758	High	High	0.922	-0.12	2.62112e+07	2.84281e+07	0	399.02	49	-0.12	-0.192001	-0.911456	0.181027	2024	0.00938079	FALSE	0.875391
2617	High	Master Protein	P50416	Carnitine O-palmitoyltransferase 1, liver isoform OS=Homo sapiens GN=CPT1A PE=1 SV=2	24.8383	17	46	17	1	773	High	High	0.922	-0.12	3.95065e+06	4.28639e+06	0	104.18	17	-0.12	-0.192001	-0.911456	0.181027	2025	0.00937307	FALSE	0.875391
2618	High	Master Protein	Q16531	DNA damage-binding protein 1 OS=Homo sapiens GN=DDB1 PE=1 SV=1	11.1404	12	20	12	1	1140	High	High	0.922	-0.12	2.31947e+06	2.51664e+06	0	43.2	12	-0.12	-0.192001	-0.911456	0.181027	2026	0.00936535	FALSE	0.875391
2619	High	Master Protein	Q92520	Protein FAM3C OS=Homo sapiens GN=FAM3C PE=1 SV=1	46.696	9	28	9	1	227	High	High	0.922	-0.12	8.71034e+06	9.45034e+06	0	83.9	9	-0.12	-0.192001	-0.911456	0.181027	2027	0.00935763	FALSE	0.875391
2620	High	Master Protein	Q6IQ22	Ras-related protein Rab-12 OS=Homo sapiens GN=RAB12 PE=1 SV=3	27.459	7	25	6	1	244	High	High	0.922	-0.12	801697	869551	0	54.19	7	-0.12	-0.192001	-0.911456	0.181027	2028	0.00934991	FALSE	0.875391
2621	High	Master Protein	P30086	Phosphatidylethanolamine-binding protein 1 OS=Homo sapiens GN=PEBP1 PE=1 SV=3	40.107	6	8	6	1	187	High	High	0.922	-0.12	893279	968990	0	14.38	6	-0.12	-0.192001	-0.911456	0.181027	2029	0.00934219	FALSE	0.875391
2622	High	Master Protein	Q9BZ29	Dedicator of cytokinesis protein 9 OS=Homo sapiens GN=DOCK9 PE=1 SV=2	2.46496	5	6	5	1	2069	High	High	0.922	-0.12	334707	363164	0	12.46	5	-0.12	-0.192001	-0.911456	0.181027	2030	0.00933447	FALSE	0.875391
2623	High	Master Protein	P03905	NADH-ubiquinone oxidoreductase chain 4 OS=Homo sapiens GN=MT-ND4 PE=1 SV=1	12.4183	4	7	4	1	459	High	High	0.922	-0.12	569573	617662	0	19.99	4	-0.12	-0.192001	-0.911456	0.181027	2031	0.00932674	FALSE	0.875391
2624	High	Master Protein	Q6P9B6	TLD domain-containing protein 1 OS=Homo sapiens GN=TLDC1 PE=1 SV=2	12.0614	4	5	4	1	456	High	High	0.922	-0.12	306344	332156	0	12.22	4	-0.12	-0.192001	-0.911456	0.181027	2032	0.00931902	FALSE	0.875391
2625	High	Master Protein	P19474	E3 ubiquitin-protein ligase TRIM21 OS=Homo sapiens GN=TRIM21 PE=1 SV=1	5.47368	3	3	3	1	475	High	High	0.922	-0.12	290746	315487	0	4.68	3	-0.12	-0.192001	-0.911456	0.181027	2033	0.0093113	FALSE	0.875391
2626	High	Master Protein	P14174	Macrophage migration inhibitory factor OS=Homo sapiens GN=MIF PE=1 SV=4	13.913	2	3	2	1	115	High	High	0.922	-0.12	752503	816411	0	4.47	2	-0.12	-0.192001	-0.911456	0.181027	2034	0.00930358	FALSE	0.875391
2627	High	Master Protein	Q9UDW1	Cytochrome b-c1 complex subunit 9 OS=Homo sapiens GN=UQCR10 PE=1 SV=3	38.0952	2	5	2	1	63	High	High	0.922	-0.12	931711	1.01049e+06	0	19.9	2	-0.12	-0.192001	-0.911456	0.181027	2035	0.00929586	FALSE	0.875391
2628	High	Master Protein	P21281	V-type proton ATPase subunit B, brain isoform OS=Homo sapiens GN=ATP6V1B2 PE=1 SV=3	19.1781	7	10	7	1	511	High	High	0.921	-0.12	616467	669356	0	23.8	7	-0.12	-0.192001	-0.911456	0.181027	2036	0.00928814	FALSE	0.875391
2629	High	Master Protein	P15328	Folate receptor alpha OS=Homo sapiens GN=FOLR1 PE=1 SV=3	20.2335	4	5	4	1	257	High	High	0.921	-0.12	381575	414529	0	11.95	4	-0.12	-0.192001	-0.911456	0.181027	2037	0.00928042	FALSE	0.875391
2630	High	Master Protein	Q9BUR5	MICOS complex subunit MIC26 OS=Homo sapiens GN=APOO PE=1 SV=1	15.6566	3	6	3	1	198	High	High	0.921	-0.12	1.31836e+06	1.43165e+06	0	5.47	3	-0.12	-0.192001	-0.911456	0.181027	2038	0.0092727	FALSE	0.875391
2631	High	Master Protein	Q16775	Hydroxyacylglutathione hydrolase, mitochondrial OS=Homo sapiens GN=HAGH PE=1 SV=2	6.49351	2	2	2	1	308	High	High	0.921	-0.12	115939	125936	0	1.76	2	-0.12	-0.192001	-0.911456	0.181027	2039	0.00926498	FALSE	0.875391
2632	High	Master Protein	P22061	Protein-L-isoaspartate(D-aspartate) O-methyltransferase OS=Homo sapiens GN=PCMT1 PE=1 SV=4	8.37004	2	3	2	1	227	High	High	0.921	-0.12	263920	286574	0	7.66	2	-0.12	-0.192001	-0.911456	0.181027	2040	0.00925726	FALSE	0.875391
2633	High	Master Protein	P10515	Dihydrolipoyllysine-residue acetyltransferase component of pyruvate dehydrogenase complex, mitochondrial OS=Homo sapiens GN=DLAT PE=1 SV=3	41.5765	25	71	25	1	647	High	High	0.92	-0.12	1.35507e+07	1.47212e+07	0	209.46	25	-0.12	-0.192001	-0.911456	0.181027	2041	0.00924954	FALSE	0.875391
2634	High	Master Protein	P26006	Integrin alpha-3 OS=Homo sapiens GN=ITGA3 PE=1 SV=5	17.1265	19	50	19	1	1051	High	High	0.92	-0.12	1.10435e+07	1.2005e+07	0	125.48	19	-0.12	-0.192001	-0.911456	0.181027	2042	0.00924182	FALSE	0.875391
2635	High	Master Protein	P45880	Voltage-dependent anion-selective channel protein 2 OS=Homo sapiens GN=VDAC2 PE=1 SV=2	66.3265	16	66	16	1	294	High	High	0.92	-0.12	2.61631e+07	2.84334e+07	0	219.81	16	-0.12	-0.192001	-0.911456	0.181027	2043	0.0092341	FALSE	0.875391
2636	High	Master Protein	P13804	Electron transfer flavoprotein subunit alpha, mitochondrial OS=Homo sapiens GN=ETFA PE=1 SV=1	26.4264	8	23	8	1	333	High	High	0.92	-0.12	2.10352e+06	2.28624e+06	0	61.98	8	-0.12	-0.192001	-0.911456	0.181027	2044	0.00922637	FALSE	0.875391
2637	High	Master Protein	Q92506	Estradiol 17-beta-dehydrogenase 8 OS=Homo sapiens GN=HSD17B8 PE=1 SV=2	13.41	3	6	3	1	261	High	High	0.92	-0.12	341488	371262	0	11.87	3	-0.12	-0.192001	-0.911456	0.181027	2045	0.00921865	FALSE	0.875391
2638	High	Master Protein	Q3ZCQ8	Mitochondrial import inner membrane translocase subunit TIM50 OS=Homo sapiens GN=TIMM50 PE=1 SV=2	33.4278	10	19	10	1	353	High	High	0.919	-0.12	1.56855e+06	1.70752e+06	0	51.11	10	-0.12	-0.192001	-0.911456	0.181027	2046	0.00921093	FALSE	0.875391
2639	High	Master Protein	O00186	Syntaxin-binding protein 3 OS=Homo sapiens GN=STXBP3 PE=1 SV=2	14.6959	10	20	10	1	592	High	High	0.919	-0.12	1.0489e+06	1.14078e+06	0	27.19	10	-0.12	-0.192001	-0.911456	0.181027	2047	0.00920321	FALSE	0.875391
2640	High	Master Protein	Q16798	NADP-dependent malic enzyme, mitochondrial OS=Homo sapiens GN=ME3 PE=2 SV=2	16.8874	8	13	7	1	604	High	High	0.919	-0.12	472525	514387	0	25.24	8	-0.12	-0.192001	-0.911456	0.181027	2048	0.00919549	FALSE	0.875391
2641	High	Master Protein	Q13162	Peroxiredoxin-4 OS=Homo sapiens GN=PRDX4 PE=1 SV=1	38.0074	8	23	5	1	271	High	High	0.919	-0.12	2.98734e+06	3.25094e+06	0	73.65	8	-0.12	-0.192001	-0.911456	0.181027	2049	0.00918777	FALSE	0.875391
2642	High	Master Protein	Q8WUH2	Transforming growth factor-beta receptor-associated protein 1 OS=Homo sapiens GN=TGFBRAP1 PE=1 SV=1	4.06977	4	4	4	1	860	High	High	0.919	-0.12	47586.5	51793.4	0	5.42	4	-0.12	-0.192001	-0.911456	0.181027	2050	0.00918005	FALSE	0.875391
2643	High	Master Protein	Q9UK41	Vacuolar protein sorting-associated protein 28 homolog OS=Homo sapiens GN=VPS28 PE=1 SV=1	18.0995	3	5	3	1	221	High	High	0.919	-0.12	136228	148287	0	8.57	3	-0.12	-0.192001	-0.911456	0.181027	2051	0.00917233	FALSE	0.875391
2644	High	Master Protein	Q9Y5S2	Serine/threonine-protein kinase MRCK beta OS=Homo sapiens GN=CDC42BPB PE=1 SV=2	2.22092	4	4	2	1	1711	High	High	0.919	-0.12	90095.4	97999.4	0	6.14	4	-0.12	-0.192001	-0.911456	0.181027	2052	0.00916461	FALSE	0.875391
2645	High	Master Protein	Q96TA1	Niban-like protein 1 OS=Homo sapiens GN=FAM129B PE=1 SV=3	20.3753	13	28	13	1	746	High	High	0.918	-0.12	2.79068e+06	3.04021e+06	0	71.3	13	-0.12	-0.192001	-0.911456	0.181027	2053	0.00915689	FALSE	0.875391
2646	High	Master Protein	O75251	NADH dehydrogenase [ubiquinone] iron-sulfur protein 7, mitochondrial OS=Homo sapiens GN=NDUFS7 PE=1 SV=3	18.7793	4	8	4	1	213	High	High	0.918	-0.12	2.34049e+06	2.54952e+06	0	20.65	4	-0.12	-0.192001	-0.911456	0.181027	2054	0.00914917	FALSE	0.875391
2647	High	Master Protein	Q9P032	NADH dehydrogenase [ubiquinone] 1 alpha subcomplex assembly factor 4 OS=Homo sapiens GN=NDUFAF4 PE=1 SV=1	18.8571	3	8	3	1	175	High	High	0.918	-0.12	574681	625906	0	14.24	3	-0.12	-0.192001	-0.911456	0.181027	2055	0.00914145	FALSE	0.875391
2648	High	Master Protein	P56381	ATP synthase subunit epsilon, mitochondrial OS=Homo sapiens GN=ATP5E PE=1 SV=2	29.4118	2	2	2	1	51	High	High	0.918	-0.12	242909	264737	0	4.73	2	-0.12	-0.192001	-0.911456	0.181027	2056	0.00913372	FALSE	0.875391
2649	High	Master Protein	Q02818	Nucleobindin-1 OS=Homo sapiens GN=NUCB1 PE=1 SV=4	44.9024	20	43	19	1	461	High	High	0.917	-0.12	2.29863e+06	2.50587e+06	0	85.42	20	-0.12	-0.192001	-0.911456	0.181027	2057	0.009126	FALSE	0.875391
2650	High	Master Protein	Q9UJS0	Calcium-binding mitochondrial carrier protein Aralar2 OS=Homo sapiens GN=SLC25A13 PE=1 SV=2	40.5926	23	55	18	1	675	High	High	0.917	-0.12	8.34429e+06	9.09803e+06	5	175.74	23	-0.12	-0.192001	-0.911456	0.181027	2058	0.00911828	FALSE	0.875391
2651	High	Master Protein	P24539	ATP synthase F(0) complex subunit B1, mitochondrial OS=Homo sapiens GN=ATP5F1 PE=1 SV=2	52.7344	14	47	14	1	256	High	High	0.917	-0.12	6.78463e+06	7.39785e+06	0	98.44	14	-0.12	-0.192001	-0.911456	0.181027	2059	0.00911056	FALSE	0.875391
2583	High	Master Protein	Q8NCN5	Pyruvate dehydrogenase phosphatase regulatory subunit, mitochondrial OS=Homo sapiens GN=PDPR PE=1 SV=2	20.9329	16	21	16	1	879	High	High	0.929	-0.11	1.92239e+06	2.06871e+06	0	47.84	16	-0.11	-0.182001	-0.864471	0.193665	1941	0.0100216	FALSE	0.881479
2584	High	Master Protein	Q14344	Guanine nucleotide-binding protein subunit alpha-13 OS=Homo sapiens GN=GNA13 PE=1 SV=2	16.4456	6	15	5	1	377	High	High	0.929	-0.11	737132	793125	0	36.57	6	-0.11	-0.182001	-0.864471	0.193665	1942	0.0100139	FALSE	0.881479
2585	High	Master Protein	P52926	High mobility group protein HMGI-C OS=Homo sapiens GN=HMGA2 PE=1 SV=1	37.6147	3	4	3	1	109	High	High	0.929	-0.11	14901.2	16038.6	0	2.2	3	-0.11	-0.182001	-0.864471	0.193665	1943	0.0100062	FALSE	0.881479
2586	High	Master Protein	Q9UBR2	Cathepsin Z OS=Homo sapiens GN=CTSZ PE=1 SV=1	11.5512	3	5	3	1	303	High	High	0.929	-0.11	175159	188540	0	15.08	3	-0.11	-0.182001	-0.864471	0.193665	1944	0.00999846	FALSE	0.881479
2587	High	Master Protein	O75380	NADH dehydrogenase [ubiquinone] iron-sulfur protein 6, mitochondrial OS=Homo sapiens GN=NDUFS6 PE=1 SV=1	31.4516	2	7	2	1	124	High	High	0.929	-0.11	5196.54	5590.82	0	15.68	2	-0.11	-0.182001	-0.864471	0.193665	1945	0.00999074	FALSE	0.881479
2588	High	Master Protein	Q8TCT8	Signal peptide peptidase-like 2A OS=Homo sapiens GN=SPPL2A PE=1 SV=2	5	2	3	2	1	520	High	High	0.928	-0.11	794560	856046	0	7.11	2	-0.11	-0.182001	-0.864471	0.193665	1946	0.00998301	FALSE	0.881479
2589	High	Master Protein	Q9NRL3	Striatin-4 OS=Homo sapiens GN=STRN4 PE=1 SV=2	3.45286	2	2	2	1	753	High	High	0.928	-0.11	140224	151163	0	2.58	2	-0.11	-0.182001	-0.864471	0.193665	1947	0.00997529	FALSE	0.881479
2590	High	Master Protein	Q9NVH0	Exonuclease 3'-5' domain-containing protein 2 OS=Homo sapiens GN=EXD2 PE=1 SV=2	4.34783	2	3	2	1	621	High	High	0.928	-0.11	169555	182774	0	8.74	2	-0.11	-0.182001	-0.864471	0.193665	1948	0.00996757	FALSE	0.881479
2591	High	Master Protein	Q13464	Rho-associated protein kinase 1 OS=Homo sapiens GN=ROCK1 PE=1 SV=1	3.10192	4	4	2	1	1354	High	High	0.928	-0.11	56588.4	60958.7	0	2.14	4	-0.11	-0.182001	-0.864471	0.193665	1949	0.00995985	FALSE	0.881479
2592	High	Master Protein	P27105	Erythrocyte band 7 integral membrane protein OS=Homo sapiens GN=STOM PE=1 SV=3	27.7778	6	9	6	1	288	High	High	0.927	-0.11	1.37251e+06	1.48067e+06	0	25.13	6	-0.11	-0.182001	-0.864471	0.193665	1950	0.00995213	FALSE	0.881479
2593	High	Master Protein	O00391	Sulfhydryl oxidase 1 OS=Homo sapiens GN=QSOX1 PE=1 SV=3	6.4257	5	6	5	1	747	High	High	0.927	-0.11	596491	643616	0	9.86	5	-0.11	-0.182001	-0.864471	0.193665	1951	0.00994441	FALSE	0.881479
2594	High	Master Protein	Q9ULA0	Aspartyl aminopeptidase OS=Homo sapiens GN=DNPEP PE=1 SV=1	8.21053	4	5	4	1	475	High	High	0.927	-0.11	519987	561021	0	12.23	4	-0.11	-0.182001	-0.864471	0.193665	1952	0.00993669	FALSE	0.881479
2595	High	Master Protein	P43007	Neutral amino acid transporter A OS=Homo sapiens GN=SLC1A4 PE=1 SV=1	3.94737	2	2	2	1	532	High	High	0.927	-0.11	157279	169682	0	0	2	-0.11	-0.182001	-0.864471	0.193665	1953	0.00992897	FALSE	0.881479
2596	High	Master Protein	Q13049	E3 ubiquitin-protein ligase TRIM32 OS=Homo sapiens GN=TRIM32 PE=1 SV=2	7.35069	3	3	3	1	653	High	High	0.926	-0.11	60653.3	65511.7	0	4.95	3	-0.11	-0.182001	-0.864471	0.193665	1954	0.00992125	FALSE	0.881479
2597	High	Master Protein	P15151	Poliovirus receptor OS=Homo sapiens GN=PVR PE=1 SV=2	8.15348	3	7	3	1	417	High	High	0.926	-0.11	562473	607315	0	18.64	3	-0.11	-0.182001	-0.864471	0.193665	1955	0.00991353	FALSE	0.881479
2598	High	Master Protein	Q99961	Endophilin-A2 OS=Homo sapiens GN=SH3GL1 PE=1 SV=1	12.2283	3	5	3	1	368	High	High	0.926	-0.11	119727	129342	0	12.37	3	-0.11	-0.182001	-0.864471	0.193665	1956	0.00990581	FALSE	0.881479
2599	High	Master Protein	Q7LGA3	Heparan sulfate 2-O-sulfotransferase 1 OS=Homo sapiens GN=HS2ST1 PE=1 SV=1	5.61798	2	3	2	1	356	High	High	0.926	-0.11	298967	322858	0	7.09	2	-0.11	-0.182001	-0.864471	0.193665	1957	0.00989809	FALSE	0.881479
2600	High	Master Protein	Q99720	Sigma non-opioid intracellular receptor 1 OS=Homo sapiens GN=SIGMAR1 PE=1 SV=1	8.96861	2	5	2	1	223	High	High	0.926	-0.11	733198	792126	0	9.65	2	-0.11	-0.182001	-0.864471	0.193665	1958	0.00989036	FALSE	0.881479
2601	High	Master Protein	Q14240	Eukaryotic initiation factor 4A-II OS=Homo sapiens GN=EIF4A2 PE=1 SV=2	40.0491	18	58	6	1	407	High	High	0.925	-0.11	768184	830660	0	126.1	18	-0.11	-0.182001	-0.864471	0.193665	1959	0.00988264	FALSE	0.881479
2602	High	Master Protein	Q14160	Protein scribble homolog OS=Homo sapiens GN=SCRIB PE=1 SV=4	4.35583	5	5	5	1	1630	High	High	0.925	-0.11	137351	148558	0	7.34	5	-0.11	-0.182001	-0.864471	0.193665	1960	0.00987492	FALSE	0.881479
2603	High	Master Protein	Q7Z5G4	Golgin subfamily A member 7 OS=Homo sapiens GN=GOLGA7 PE=1 SV=2	13.8686	2	2	2	1	137	High	High	0.925	-0.11	63537	68708.3	0	0	2	-0.11	-0.182001	-0.864471	0.193665	1961	0.0098672	FALSE	0.881479
2604	High	Master Protein	Q8IWV7	E3 ubiquitin-protein ligase UBR1 OS=Homo sapiens GN=UBR1 PE=1 SV=1	1.82962	2	2	2	1	1749	High	High	0.925	-0.11	30898	33393.6	0	2.37	2	-0.11	-0.182001	-0.864471	0.193665	1962	0.00985948	FALSE	0.881479
2605	High	Master Protein	Q00688	Peptidyl-prolyl cis-trans isomerase FKBP3 OS=Homo sapiens GN=FKBP3 PE=1 SV=1	8.48214	2	3	2	1	224	High	High	0.925	-0.11	544822	588797	0	6.97	2	-0.11	-0.182001	-0.864471	0.193665	1963	0.00985176	FALSE	0.881479
2606	High	Master Protein	Q9HCC0	Methylcrotonoyl-CoA carboxylase beta chain, mitochondrial OS=Homo sapiens GN=MCCC2 PE=1 SV=1	25.9325	11	29	11	1	563	High	High	0.924	-0.11	2.81736e+06	3.04929e+06	0	74.02	11	-0.11	-0.182001	-0.864471	0.193665	1964	0.00984404	FALSE	0.881479
2607	High	Master Protein	Q04837	Single-stranded DNA-binding protein, mitochondrial OS=Homo sapiens GN=SSBP1 PE=1 SV=1	62.1622	11	29	11	1	148	High	High	0.924	-0.11	4.1771e+06	4.52013e+06	0	91.69	11	-0.11	-0.182001	-0.864471	0.193665	1965	0.00983632	FALSE	0.881479
2608	High	Master Protein	P22033	Methylmalonyl-CoA mutase, mitochondrial OS=Homo sapiens GN=MUT PE=1 SV=4	9.86667	7	8	7	1	750	High	High	0.924	-0.11	316697	342803	0	16.3	7	-0.11	-0.182001	-0.864471	0.193665	1966	0.0098286	FALSE	0.881479
2609	High	Master Protein	P18084	Integrin beta-5 OS=Homo sapiens GN=ITGB5 PE=1 SV=1	11.2641	7	9	7	1	799	High	High	0.924	-0.11	403849	436992	0	31.76	7	-0.11	-0.182001	-0.864471	0.193665	1967	0.00982088	FALSE	0.881479
2610	High	Master Protein	Q9UHQ4	B-cell receptor-associated protein 29 OS=Homo sapiens GN=BCAP29 PE=1 SV=2	21.1618	7	9	7	1	241	High	High	0.924	-0.11	696364	753376	0	12.35	7	-0.11	-0.182001	-0.864471	0.193665	1968	0.00981316	FALSE	0.881479
2611	High	Master Protein	Q9UII4	E3 ISG15--protein ligase HERC5 OS=Homo sapiens GN=HERC5 PE=1 SV=2	3.90625	3	3	3	1	1024	High	High	0.924	-0.11	285139	308715	0	6.7	3	-0.11	-0.182001	-0.864471	0.193665	1969	0.00980544	FALSE	0.881479
2612	High	Master Protein	Q8WV93	AFG1-like ATPase OS=Homo sapiens GN=AFG1L PE=1 SV=2	2.9106	2	2	2	1	481	High	High	0.924	-0.11	58735.9	63567.7	0	2.14	2	-0.11	-0.182001	-0.864471	0.193665	1970	0.00979771	FALSE	0.881479
2537	High	Master Protein	P06756	Integrin alpha-V OS=Homo sapiens GN=ITGAV PE=1 SV=2	17.3664	14	18	14	1	1048	High	High	0.936	-0.1	1.69176e+06	1.80833e+06	0	41.5	14	-0.1	-0.172001	-0.817485	0.206826	1850	0.0107242	FALSE	0.887611
2538	High	Master Protein	P30533	Alpha-2-macroglobulin receptor-associated protein OS=Homo sapiens GN=LRPAP1 PE=1 SV=1	26.0504	13	22	13	1	357	High	High	0.936	-0.1	5.47481e+06	5.84952e+06	0	41.11	13	-0.1	-0.172001	-0.817485	0.206826	1851	0.0107165	FALSE	0.887611
2540	High	Master Protein	Q96LJ7	Dehydrogenase/reductase SDR family member 1 OS=Homo sapiens GN=DHRS1 PE=1 SV=1	20.7668	4	5	4	1	313	High	High	0.936	-0.1	155242	165833	0	11.37	4	-0.1	-0.172001	-0.817485	0.206826	1852	0.0107088	FALSE	0.887611
2541	High	Master Protein	Q5XKP0	MICOS complex subunit MIC13 OS=Homo sapiens GN=MIC13 PE=1 SV=1	11.8644	2	5	2	1	118	High	High	0.936	-0.1	1.85747e+06	1.98516e+06	0	10.07	2	-0.1	-0.172001	-0.817485	0.206826	1853	0.0107011	FALSE	0.887611
2543	High	Master Protein	P16278	Beta-galactosidase OS=Homo sapiens GN=GLB1 PE=1 SV=2	7.38552	4	12	4	1	677	High	High	0.935	-0.1	809737	865718	0	19.71	4	-0.1	-0.172001	-0.817485	0.206826	1854	0.0106933	FALSE	0.887611
2544	High	Master Protein	Q10472	Polypeptide N-acetylgalactosaminyltransferase 1 OS=Homo sapiens GN=GALNT1 PE=1 SV=1	7.51342	4	9	4	1	559	High	High	0.935	-0.1	426982	456428	0	11.66	4	-0.1	-0.172001	-0.817485	0.206826	1855	0.0106856	FALSE	0.887611
2545	High	Master Protein	Q969V5	Mitochondrial ubiquitin ligase activator of NFKB 1 OS=Homo sapiens GN=MUL1 PE=1 SV=1	10.2273	3	4	3	1	352	High	High	0.935	-0.1	255715	273624	0	8.53	3	-0.1	-0.172001	-0.817485	0.206826	1856	0.0106779	FALSE	0.887611
2546	High	Master Protein	Q9BW19	Kinesin-like protein KIFC1 OS=Homo sapiens GN=KIFC1 PE=1 SV=2	3.41753	2	2	2	1	673	High	High	0.935	-0.1	79723.4	85293.7	0	3.54	2	-0.1	-0.172001	-0.817485	0.206826	1857	0.0106702	FALSE	0.887611
2547	High	Master Protein	O00471	Exocyst complex component 5 OS=Homo sapiens GN=EXOC5 PE=1 SV=1	12.4294	9	10	9	1	708	High	High	0.934	-0.1	856372	917189	0	11.58	9	-0.1	-0.172001	-0.817485	0.206826	1858	0.0106624	FALSE	0.887611
2548	High	Master Protein	P50453	Serpin B9 OS=Homo sapiens GN=SERPINB9 PE=1 SV=1	21.0106	6	6	5	1	376	High	High	0.934	-0.1	712780	763074	0	14.38	6	-0.1	-0.172001	-0.817485	0.206826	1859	0.0106547	FALSE	0.887611
2549	High	Master Protein	Q9Y6K9	NF-kappa-B essential modulator OS=Homo sapiens GN=IKBKG PE=1 SV=2	9.7852	4	5	4	1	419	High	High	0.934	-0.1	164824	176467	0	8.12	4	-0.1	-0.172001	-0.817485	0.206826	1860	0.010647	FALSE	0.887611
2550	High	Master Protein	P17931	Galectin-3 OS=Homo sapiens GN=LGALS3 PE=1 SV=5	12.8	3	4	3	1	250	High	High	0.934	-0.1	531235	568504	0	10.77	3	-0.1	-0.172001	-0.817485	0.206826	1861	0.0106393	FALSE	0.887611
2551	High	Master Protein	Q16611	Bcl-2 homologous antagonist/killer OS=Homo sapiens GN=BAK1 PE=1 SV=1	12.3223	3	7	3	1	211	High	High	0.934	-0.1	553508	592781	0	18.83	3	-0.1	-0.172001	-0.817485	0.206826	1862	0.0106316	FALSE	0.887611
2552	High	Master Protein	Q9NX63	MICOS complex subunit MIC19 OS=Homo sapiens GN=CHCHD3 PE=1 SV=1	40.9692	15	48	15	1	227	High	High	0.933	-0.1	5.563e+06	5.96263e+06	0	87.35	15	-0.1	-0.172001	-0.817485	0.206826	1863	0.0106238	FALSE	0.887611
2553	High	Master Protein	Q32P28	Prolyl 3-hydroxylase 1 OS=Homo sapiens GN=P3H1 PE=1 SV=2	16.9837	12	21	12	1	736	High	High	0.933	-0.1	1.41665e+06	1.51854e+06	0	30.58	12	-0.1	-0.172001	-0.817485	0.206826	1864	0.0106161	FALSE	0.887611
2554	High	Master Protein	Q86SF2	N-acetylgalactosaminyltransferase 7 OS=Homo sapiens GN=GALNT7 PE=1 SV=1	18.417	11	16	11	1	657	High	High	0.933	-0.1	2.66714e+06	2.85886e+06	0	30.65	11	-0.1	-0.172001	-0.817485	0.206826	1865	0.0106084	FALSE	0.887611
2555	High	Master Protein	P43121	Cell surface glycoprotein MUC18 OS=Homo sapiens GN=MCAM PE=1 SV=2	13.7771	8	10	8	1	646	High	High	0.933	-0.1	2.29123e+06	2.45632e+06	0	26.97	8	-0.1	-0.172001	-0.817485	0.206826	1866	0.0106007	FALSE	0.887611
2556	High	Master Protein	Q96C19	EF-hand domain-containing protein D2 OS=Homo sapiens GN=EFHD2 PE=1 SV=1	27.5	6	9	6	1	240	High	High	0.933	-0.1	337868	361982	0	13.19	6	-0.1	-0.172001	-0.817485	0.206826	1867	0.010593	FALSE	0.887611
2557	High	Master Protein	P16220	Cyclic AMP-responsive element-binding protein 1 OS=Homo sapiens GN=CREB1 PE=1 SV=2	4.69208	2	2	2	1	341	High	High	0.933	-0.1	227769	244198	0	2.43	2	-0.1	-0.172001	-0.817485	0.206826	1868	0.0105852	FALSE	0.887611
2558	High	Master Protein	Q8IYS2	Uncharacterized protein KIAA2013 OS=Homo sapiens GN=KIAA2013 PE=1 SV=1	6.30915	2	3	2	1	634	High	High	0.933	-0.1	110640	118599	0	9.99	2	-0.1	-0.172001	-0.817485	0.206826	1869	0.0105775	FALSE	0.887611
2559	High	Master Protein	Q9NZ08	Endoplasmic reticulum aminopeptidase 1 OS=Homo sapiens GN=ERAP1 PE=1 SV=3	21.9979	20	42	20	1	941	High	High	0.932	-0.1	4.73529e+06	5.07966e+06	0	90.22	20	-0.1	-0.172001	-0.817485	0.206826	1870	0.0105698	FALSE	0.887611
2560	High	Master Protein	P23368	NAD-dependent malic enzyme, mitochondrial OS=Homo sapiens GN=ME2 PE=1 SV=1	27.0548	11	18	10	1	584	High	High	0.932	-0.1	3.2e+06	3.435e+06	1	55.87	11	-0.1	-0.172001	-0.817485	0.206826	1871	0.0105621	FALSE	0.887611
2561	High	Master Protein	Q9Y6C9	Mitochondrial carrier homolog 2 OS=Homo sapiens GN=MTCH2 PE=1 SV=1	23.1023	6	11	6	1	303	High	High	0.932	-0.1	1.98654e+06	2.13241e+06	0	32.75	6	-0.1	-0.172001	-0.817485	0.206826	1872	0.0105544	FALSE	0.887611
2562	High	Master Protein	P33897	ATP-binding cassette sub-family D member 1 OS=Homo sapiens GN=ABCD1 PE=1 SV=2	8.99329	5	5	5	1	745	High	High	0.932	-0.1	80384	86215.9	0	10.76	5	-0.1	-0.172001	-0.817485	0.206826	1873	0.0105466	FALSE	0.887611
2563	High	Master Protein	P12236	ADP/ATP translocase 3 OS=Homo sapiens GN=SLC25A6 PE=1 SV=4	62.4161	22	127	5	1	298	High	High	0.932	-0.1	1.40814e+08	1.5104e+08	20	358.55	22	-0.1	-0.172001	-0.817485	0.206826	1874	0.0105389	FALSE	0.887611
2564	High	Master Protein	P14635	G2/mitotic-specific cyclin-B1 OS=Homo sapiens GN=CCNB1 PE=1 SV=1	5.54273	2	3	2	1	433	High	High	0.932	-0.1	271580	291290	0	5.01	2	-0.1	-0.172001	-0.817485	0.206826	1875	0.0105312	FALSE	0.887611
2565	High	Master Protein	Q16181	Septin-7 OS=Homo sapiens GN=SEPT7 PE=1 SV=2	41.4188	19	38	18	1	437	High	High	0.931	-0.1	6.06772e+06	6.51794e+06	1	87.72	19	-0.1	-0.172001	-0.817485	0.206826	1876	0.0105235	FALSE	0.887611
2566	High	Master Protein	Q01650	Large neutral amino acids transporter small subunit 1 OS=Homo sapiens GN=SLC7A5 PE=1 SV=2	18.146	9	15	9	1	507	High	High	0.931	-0.1	1.96963e+06	2.11628e+06	0	28.55	9	-0.1	-0.172001	-0.817485	0.206826	1877	0.0105158	FALSE	0.887611
2567	High	Master Protein	P61758	Prefoldin subunit 3 OS=Homo sapiens GN=VBP1 PE=1 SV=3	39.0863	7	13	7	1	197	High	High	0.931	-0.1	2.01695e+06	2.16582e+06	0	33.02	7	-0.1	-0.172001	-0.817485	0.206826	1878	0.010508	FALSE	0.887611
2568	High	Master Protein	Q9UIA9	Exportin-7 OS=Homo sapiens GN=XPO7 PE=1 SV=3	6.80773	6	6	6	1	1087	High	High	0.931	-0.1	288329	309758	0	11.61	6	-0.1	-0.172001	-0.817485	0.206826	1879	0.0105003	FALSE	0.887611
2569	High	Master Protein	P14324	Farnesyl pyrophosphate synthase OS=Homo sapiens GN=FDPS PE=1 SV=4	15.5131	6	9	6	1	419	High	High	0.931	-0.1	606700	651960	0	20.75	6	-0.1	-0.172001	-0.817485	0.206826	1880	0.0104926	FALSE	0.887611
2570	High	Master Protein	P12109	Collagen alpha-1(VI) chain OS=Homo sapiens GN=COL6A1 PE=1 SV=3	6.22568	5	6	5	1	1028	High	High	0.931	-0.1	162123	174191	0	9.93	5	-0.1	-0.172001	-0.817485	0.206826	1881	0.0104849	FALSE	0.887611
2571	High	Master Protein	Q8WVY7	Ubiquitin-like domain-containing CTD phosphatase 1 OS=Homo sapiens GN=UBLCP1 PE=1 SV=2	11.9497	4	4	4	1	318	High	High	0.931	-0.1	196390	211021	0	10.74	4	-0.1	-0.172001	-0.817485	0.206826	1882	0.0104771	FALSE	0.887611
2572	High	Master Protein	O14656	Torsin-1A OS=Homo sapiens GN=TOR1A PE=1 SV=1	17.4699	5	6	4	1	332	High	High	0.931	-0.1	336395	361329	1	13.81	5	-0.1	-0.172001	-0.817485	0.206826	1883	0.0104694	FALSE	0.887611
2573	High	Master Protein	Q96L58	Beta-1,3-galactosyltransferase 6 OS=Homo sapiens GN=B3GALT6 PE=1 SV=2	10.9422	3	4	3	1	329	High	High	0.931	-0.1	124802	134097	0	6.73	3	-0.1	-0.172001	-0.817485	0.206826	1884	0.0104617	FALSE	0.887611
2574	High	Master Protein	Q92882	Osteoclast-stimulating factor 1 OS=Homo sapiens GN=OSTF1 PE=1 SV=2	18.2243	3	3	3	1	214	High	High	0.931	-0.1	452042	485657	0	5.06	3	-0.1	-0.172001	-0.817485	0.206826	1885	0.010454	FALSE	0.887611
2575	High	Master Protein	Q969M1	Mitochondrial import receptor subunit TOM40B OS=Homo sapiens GN=TOMM40L PE=1 SV=1	7.46753	2	3	2	1	308	High	High	0.931	-0.1	259118	278441	0	8.42	2	-0.1	-0.172001	-0.817485	0.206826	1886	0.0104463	FALSE	0.887611
2576	High	Master Protein	Q96EC8	Protein YIPF6 OS=Homo sapiens GN=YIPF6 PE=1 SV=2	8.05085	2	2	2	1	236	High	High	0.931	-0.1	189930	204056	0	1.94	2	-0.1	-0.172001	-0.817485	0.206826	1887	0.0104385	FALSE	0.887611
2577	High	Master Protein	Q9HCD5	Nuclear receptor coactivator 5 OS=Homo sapiens GN=NCOA5 PE=1 SV=2	4.66321	2	2	2	1	579	High	High	0.931	-0.1	23111.8	24817.3	0	0	2	-0.1	-0.172001	-0.817485	0.206826	1888	0.0104308	FALSE	0.887611
2578	High	Master Protein	O14763	Tumor necrosis factor receptor superfamily member 10B OS=Homo sapiens GN=TNFRSF10B PE=1 SV=2	6.81818	2	3	2	1	440	High	High	0.931	-0.1	35942.1	38621.6	0	6.93	2	-0.1	-0.172001	-0.817485	0.206826	1889	0.0104231	FALSE	0.887611
2579	High	Master Protein	O00505	Importin subunit alpha-4 OS=Homo sapiens GN=KPNA3 PE=1 SV=2	5.9501	2	2	2	1	521	High	High	0.931	-0.1	30636.9	32905.8	0	3.61	2	-0.1	-0.172001	-0.817485	0.206826	1890	0.0104154	FALSE	0.887611
2580	High	Master Protein	O60443	Non-syndromic hearing impairment protein 5 OS=Homo sapiens GN=DFNA5 PE=1 SV=2	13.9113	6	9	6	1	496	High	High	0.93	-0.1	1.19666e+06	1.28692e+06	0	21.63	6	-0.1	-0.172001	-0.817485	0.206826	1891	0.0104077	FALSE	0.887611
2581	High	Master Protein	Q01469	Fatty acid-binding protein, epidermal OS=Homo sapiens GN=FABP5 PE=1 SV=3	30.3704	4	4	4	1	135	High	High	0.93	-0.1	101823	109435	0	5.45	4	-0.1	-0.172001	-0.817485	0.206826	1892	0.0103999	FALSE	0.887611
2582	High	Master Protein	P35637	RNA-binding protein FUS OS=Homo sapiens GN=FUS PE=1 SV=1	7.60456	4	6	3	1	526	High	High	0.93	-0.1	276512	297328	1	14	4	-0.1	-0.172001	-0.817485	0.206826	1893	0.0103922	FALSE	0.887611
2490	High	Master Protein	P52209	6-phosphogluconate dehydrogenase, decarboxylating OS=Homo sapiens GN=PGD PE=1 SV=3	29.8137	13	24	13	1	483	High	High	0.943	-0.09	1.79447e+06	1.90366e+06	0	52.45	13	-0.09	-0.162001	-0.770499	0.220502	1773	0.0113187	FALSE	0.893784
2495	High	Master Protein	O95786	Probable ATP-dependent RNA helicase DDX58 OS=Homo sapiens GN=DDX58 PE=1 SV=2	4.64865	5	6	5	1	925	High	High	0.943	-0.09	955520	1.01365e+06	0	12.63	5	-0.09	-0.162001	-0.770499	0.220502	1774	0.011311	FALSE	0.893784
2498	High	Master Protein	Q9P0V3	SH3 domain-binding protein 4 OS=Homo sapiens GN=SH3BP4 PE=1 SV=1	5.19211	4	6	4	1	963	High	High	0.943	-0.09	39279	41673.8	0	12.5	4	-0.09	-0.162001	-0.770499	0.220502	1775	0.0113033	FALSE	0.893784
2499	High	Master Protein	Q13561	Dynactin subunit 2 OS=Homo sapiens GN=DCTN2 PE=1 SV=4	14.7132	4	5	4	1	401	High	High	0.943	-0.09	90075.6	95558.2	0	13.04	4	-0.09	-0.162001	-0.770499	0.220502	1776	0.0112956	FALSE	0.893784
2500	High	Master Protein	P38159	RNA-binding motif protein, X chromosome OS=Homo sapiens GN=RBMX PE=1 SV=3	10.9974	4	9	4	1	391	High	High	0.943	-0.09	1.53021e+06	1.62337e+06	0	22.76	4	-0.09	-0.162001	-0.770499	0.220502	1777	0.0112878	FALSE	0.893784
2503	High	Master Protein	Q9Y512	Sorting and assembly machinery component 50 homolog OS=Homo sapiens GN=SAMM50 PE=1 SV=3	21.5352	9	22	9	1	469	High	High	0.942	-0.09	2.67601e+06	2.84054e+06	0	76.36	9	-0.09	-0.162001	-0.770499	0.220502	1778	0.0112801	FALSE	0.893784
2504	High	Master Protein	O75695	Protein XRP2 OS=Homo sapiens GN=RP2 PE=1 SV=4	14.8571	8	15	8	1	350	High	High	0.942	-0.09	3.06845e+06	3.2585e+06	0	36.22	8	-0.09	-0.162001	-0.770499	0.220502	1779	0.0112724	FALSE	0.893784
2505	High	Master Protein	P47756	F-actin-capping protein subunit beta OS=Homo sapiens GN=CAPZB PE=1 SV=4	20.2166	7	10	7	1	277	High	High	0.942	-0.09	1.94785e+06	2.06788e+06	0	20.46	7	-0.09	-0.162001	-0.770499	0.220502	1780	0.0112647	FALSE	0.893784
2506	High	Master Protein	Q96KP4	Cytosolic non-specific dipeptidase OS=Homo sapiens GN=CNDP2 PE=1 SV=2	12.6316	5	8	5	1	475	High	High	0.942	-0.09	363610	385989	0	12.9	5	-0.09	-0.162001	-0.770499	0.220502	1781	0.0112569	FALSE	0.893784
2507	High	Master Protein	Q9BUT1	3-hydroxybutyrate dehydrogenase type 2 OS=Homo sapiens GN=BDH2 PE=1 SV=2	11.8367	3	5	3	1	245	High	High	0.942	-0.09	678291	720200	0	4.91	3	-0.09	-0.162001	-0.770499	0.220502	1782	0.0112492	FALSE	0.893784
2508	High	Master Protein	P32320	Cytidine deaminase OS=Homo sapiens GN=CDA PE=1 SV=2	25.3425	2	2	2	1	146	High	High	0.942	-0.09	105535	112084	0	5.73	2	-0.09	-0.162001	-0.770499	0.220502	1783	0.0112415	FALSE	0.893784
2509	High	Master Protein	Q9H2J4	Phosducin-like protein 3 OS=Homo sapiens GN=PDCL3 PE=1 SV=1	7.53138	2	2	2	1	239	High	High	0.942	-0.09	129289	137300	0	4.29	2	-0.09	-0.162001	-0.770499	0.220502	1784	0.0112338	FALSE	0.893784
2510	High	Master Protein	P60174	Triosephosphate isomerase OS=Homo sapiens GN=TPI1 PE=1 SV=3	69.9301	16	58	16	1	286	High	High	0.941	-0.09	1.53153e+07	1.62677e+07	0	189.29	16	-0.09	-0.162001	-0.770499	0.220502	1785	0.0112261	FALSE	0.893784
2511	High	Master Protein	Q13439	Golgin subfamily A member 4 OS=Homo sapiens GN=GOLGA4 PE=1 SV=1	3.13901	7	7	6	1	2230	High	High	0.941	-0.09	136960	145476	0	4.81	7	-0.09	-0.162001	-0.770499	0.220502	1786	0.0112183	FALSE	0.893784
2512	High	Master Protein	Q9BTY2	Plasma alpha-L-fucosidase OS=Homo sapiens GN=FUCA2 PE=1 SV=2	7.28051	3	4	3	1	467	High	High	0.94	-0.09	607662	646399	0	11.1	3	-0.09	-0.162001	-0.770499	0.220502	1787	0.0112106	FALSE	0.893784
2513	High	Master Protein	O95297	Myelin protein zero-like protein 1 OS=Homo sapiens GN=MPZL1 PE=1 SV=1	8.17844	2	3	2	1	269	High	High	0.94	-0.09	481048	511539	0	7.5	2	-0.09	-0.162001	-0.770499	0.220502	1788	0.0112029	FALSE	0.893784
2514	High	Master Protein	Q00325	Phosphate carrier protein, mitochondrial OS=Homo sapiens GN=SLC25A3 PE=1 SV=2	37.0166	16	75	16	1	362	High	High	0.939	-0.09	4.59778e+07	4.89539e+07	0	165.8	16	-0.09	-0.162001	-0.770499	0.220502	1789	0.0111952	FALSE	0.893784
2515	High	Master Protein	Q06481	Amyloid-like protein 2 OS=Homo sapiens GN=APLP2 PE=1 SV=2	16.6448	13	21	13	1	763	High	High	0.939	-0.09	1.79465e+06	1.91097e+06	0	43.29	13	-0.09	-0.162001	-0.770499	0.220502	1790	0.0111875	FALSE	0.893784
2516	High	Master Protein	P13726	Tissue factor OS=Homo sapiens GN=F3 PE=1 SV=1	24.4068	8	22	8	1	295	High	High	0.939	-0.09	1.57971e+06	1.68281e+06	0	60.52	8	-0.09	-0.162001	-0.770499	0.220502	1791	0.0111797	FALSE	0.893784
2517	High	Master Protein	O00220	Tumor necrosis factor receptor superfamily member 10A OS=Homo sapiens GN=TNFRSF10A PE=1 SV=3	10.8974	4	4	4	1	468	High	High	0.939	-0.09	260690	277687	0	6.53	4	-0.09	-0.162001	-0.770499	0.220502	1792	0.011172	FALSE	0.893784
2518	High	Master Protein	Q14444	Caprin-1 OS=Homo sapiens GN=CAPRIN1 PE=1 SV=2	5.78279	4	6	4	1	709	High	High	0.939	-0.09	899020	957779	0	14.87	4	-0.09	-0.162001	-0.770499	0.220502	1793	0.0111643	FALSE	0.893784
2519	High	Master Protein	Q8TED4	Glucose-6-phosphate exchanger SLC37A2 OS=Homo sapiens GN=SLC37A2 PE=2 SV=2	6.38723	3	4	3	1	501	High	High	0.939	-0.09	250849	267079	0	11.34	3	-0.09	-0.162001	-0.770499	0.220502	1794	0.0111566	FALSE	0.893784
2520	High	Master Protein	Q16762	Thiosulfate sulfurtransferase OS=Homo sapiens GN=TST PE=1 SV=4	7.74411	3	4	3	1	297	High	High	0.939	-0.09	374528	399043	0	0	3	-0.09	-0.162001	-0.770499	0.220502	1795	0.0111489	FALSE	0.893784
2521	High	Master Protein	Q9Y2E5	Epididymis-specific alpha-mannosidase OS=Homo sapiens GN=MAN2B2 PE=1 SV=4	3.27056	2	2	2	1	1009	High	High	0.939	-0.09	157721	168056	0	2.64	2	-0.09	-0.162001	-0.770499	0.220502	1796	0.0111411	FALSE	0.893784
2522	High	Master Protein	P01892	HLA class I histocompatibility antigen, A-2 alpha chain OS=Homo sapiens GN=HLA-A PE=1 SV=1	49.863	17	95	12	1	365	High	High	0.938	-0.09	1.63639e+07	1.74515e+07	5	248.24	17	-0.09	-0.162001	-0.770499	0.220502	1797	0.0111334	FALSE	0.893784
2523	High	Master Protein	Q13586	Stromal interaction molecule 1 OS=Homo sapiens GN=STIM1 PE=1 SV=3	9.19708	7	14	7	1	685	High	High	0.938	-0.09	1.02921e+06	1.09705e+06	0	27.37	7	-0.09	-0.162001	-0.770499	0.220502	1798	0.0111257	FALSE	0.893784
2524	High	Master Protein	P42330	Aldo-keto reductase family 1 member C3 OS=Homo sapiens GN=AKR1C3 PE=1 SV=4	13.3127	3	4	3	1	323	High	High	0.938	-0.09	144995	154658	0	17.64	3	-0.09	-0.162001	-0.770499	0.220502	1799	0.011118	FALSE	0.893784
2525	High	Master Protein	O43169	Cytochrome b5 type B OS=Homo sapiens GN=CYB5B PE=1 SV=2	13.6986	3	6	3	1	146	High	High	0.938	-0.09	1.33667e+06	1.42527e+06	0	10.97	3	-0.09	-0.162001	-0.770499	0.220502	1800	0.0111103	FALSE	0.893784
2526	High	Master Protein	Q9UHV9	Prefoldin subunit 2 OS=Homo sapiens GN=PFDN2 PE=1 SV=1	24.6753	3	6	3	1	154	High	High	0.938	-0.09	382766	408274	0	16.59	3	-0.09	-0.162001	-0.770499	0.220502	1801	0.0111025	FALSE	0.893784
2527	High	Master Protein	O00330	Pyruvate dehydrogenase protein X component, mitochondrial OS=Homo sapiens GN=PDHX PE=1 SV=3	39.1218	20	31	20	1	501	High	High	0.937	-0.09	5.94208e+06	6.34157e+06	0	57.22	20	-0.09	-0.162001	-0.770499	0.220502	1802	0.0110948	FALSE	0.893784
2528	High	Master Protein	Q02978	Mitochondrial 2-oxoglutarate/malate carrier protein OS=Homo sapiens GN=SLC25A11 PE=1 SV=3	53.5032	14	37	14	1	314	High	High	0.937	-0.09	7.97548e+06	8.51054e+06	0	115.99	14	-0.09	-0.162001	-0.770499	0.220502	1803	0.0110871	FALSE	0.893784
2529	High	Master Protein	P61421	V-type proton ATPase subunit d 1 OS=Homo sapiens GN=ATP6V0D1 PE=1 SV=1	33.3333	12	21	12	1	351	High	High	0.937	-0.09	1.65023e+06	1.76094e+06	0	43.67	12	-0.09	-0.162001	-0.770499	0.220502	1804	0.0110794	FALSE	0.893784
2530	High	Master Protein	Q15758	Neutral amino acid transporter B(0) OS=Homo sapiens GN=SLC1A5 PE=1 SV=2	23.475	11	34	11	1	541	High	High	0.937	-0.09	1.81421e+06	1.93586e+06	0	61.58	11	-0.09	-0.162001	-0.770499	0.220502	1805	0.0110716	FALSE	0.893784
2531	High	Master Protein	Q9Y375	Complex I intermediate-associated protein 30, mitochondrial OS=Homo sapiens GN=NDUFAF1 PE=1 SV=2	24.159	7	11	7	1	327	High	High	0.937	-0.09	850123	907393	0	25.24	7	-0.09	-0.162001	-0.770499	0.220502	1806	0.0110639	FALSE	0.893784
2532	High	Master Protein	O15126	Secretory carrier-associated membrane protein 1 OS=Homo sapiens GN=SCAMP1 PE=1 SV=2	11.5385	5	5	4	1	338	High	High	0.937	-0.09	503061	536945	0	10.76	5	-0.09	-0.162001	-0.770499	0.220502	1807	0.0110562	FALSE	0.893784
2533	High	Master Protein	O43520	Phospholipid-transporting ATPase IC OS=Homo sapiens GN=ATP8B1 PE=1 SV=3	1.83853	2	2	2	1	1251	High	High	0.937	-0.09	143090	152664	0	2.9	2	-0.09	-0.162001	-0.770499	0.220502	1808	0.0110485	FALSE	0.893784
2534	High	Master Protein	O15120	1-acyl-sn-glycerol-3-phosphate acyltransferase beta OS=Homo sapiens GN=AGPAT2 PE=1 SV=1	8.63309	2	4	2	1	278	High	High	0.937	-0.09	247467	264014	0	6.08	2	-0.09	-0.162001	-0.770499	0.220502	1809	0.0110408	FALSE	0.893784
2535	High	Master Protein	Q96J84	Kin of IRRE-like protein 1 OS=Homo sapiens GN=KIRREL PE=1 SV=2	3.83091	2	2	2	1	757	High	High	0.937	-0.09	35813.5	38229.1	0	2.08	2	-0.09	-0.162001	-0.770499	0.220502	1810	0.011033	FALSE	0.893784
2536	High	Master Protein	Q9BTZ2	Dehydrogenase/reductase SDR family member 4 OS=Homo sapiens GN=DHRS4 PE=1 SV=3	6.11511	2	3	2	1	278	High	High	0.937	-0.09	587169	626713	0	7.68	2	-0.09	-0.162001	-0.770499	0.220502	1811	0.0110253	FALSE	0.893784
2539	High	Master Protein	Q8NE86	Calcium uniporter protein, mitochondrial OS=Homo sapiens GN=MCU PE=1 SV=1	29.0598	10	25	10	1	351	High	High	0.936	-0.09	2.11464e+06	2.25807e+06	0	55.39	10	-0.09	-0.162001	-0.770499	0.220502	1812	0.0110176	FALSE	0.893784
2542	High	Master Protein	A0AVF1	Intraflagellar transport protein 56 OS=Homo sapiens GN=TTC26 PE=2 SV=1	2.70758	2	2	2	1	554	High	High	0.936	-0.09	90330.8	96464.2	0	0	2	-0.09	-0.162001	-0.770499	0.220502	1813	0.0110099	FALSE	0.893784
2444	High	Master Protein	P07237	Protein disulfide-isomerase OS=Homo sapiens GN=P4HB PE=1 SV=3	75.1969	45	226	45	1	508	High	High	0.949	-0.08	7.75428e+07	8.1726e+07	0	593.19	45	-0.08	-0.152001	-0.723513	0.234682	1668	0.0121294	FALSE	0.900001
2445	High	Master Protein	Q70UQ0	Inhibitor of nuclear factor kappa-B kinase-interacting protein OS=Homo sapiens GN=IKBIP PE=1 SV=1	45.4286	20	51	19	1	350	High	High	0.949	-0.08	9.64235e+06	1.01605e+07	0	108.58	20	-0.08	-0.152001	-0.723513	0.234682	1669	0.0121217	FALSE	0.900001
2446	High	Master Protein	Q13217	DnaJ homolog subfamily C member 3 OS=Homo sapiens GN=DNAJC3 PE=1 SV=1	18.8492	10	17	10	1	504	High	High	0.949	-0.08	1.54666e+06	1.63063e+06	0	25.07	10	-0.08	-0.152001	-0.723513	0.234682	1670	0.012114	FALSE	0.900001
2449	High	Master Protein	Q7KYR7	Butyrophilin subfamily 2 member A1 OS=Homo sapiens GN=BTN2A1 PE=1 SV=3	4.55408	3	5	2	1	527	High	High	0.949	-0.08	295944	311977	0	3.66	3	-0.08	-0.152001	-0.723513	0.234682	1671	0.0121062	FALSE	0.900001
2450	High	Master Protein	P54819	Adenylate kinase 2, mitochondrial OS=Homo sapiens GN=AK2 PE=1 SV=2	9.20502	2	3	2	1	239	High	High	0.949	-0.08	491351	517920	0	5.81	2	-0.08	-0.152001	-0.723513	0.234682	1672	0.0120985	FALSE	0.900001
2451	High	Master Protein	Q9NSE4	Isoleucine--tRNA ligase, mitochondrial OS=Homo sapiens GN=IARS2 PE=1 SV=2	21.3439	20	62	20	1	1012	High	High	0.948	-0.08	8.6999e+06	9.17668e+06	0	152.63	20	-0.08	-0.152001	-0.723513	0.234682	1673	0.0120908	FALSE	0.900001
2452	High	Master Protein	P61026	Ras-related protein Rab-10 OS=Homo sapiens GN=RAB10 PE=1 SV=1	53.5	12	45	9	1	200	High	High	0.948	-0.08	7.85331e+06	8.28114e+06	0	118.68	12	-0.08	-0.152001	-0.723513	0.234682	1674	0.0120831	FALSE	0.900001
2453	High	Master Protein	P29317	Ephrin type-A receptor 2 OS=Homo sapiens GN=EPHA2 PE=1 SV=2	11.373	11	18	9	1	976	High	High	0.948	-0.08	4.1615e+06	4.38969e+06	2	47.72	11	-0.08	-0.152001	-0.723513	0.234682	1675	0.0120754	FALSE	0.900001
2454	High	Master Protein	P36871	Phosphoglucomutase-1 OS=Homo sapiens GN=PGM1 PE=1 SV=3	17.9715	9	11	9	1	562	High	High	0.948	-0.08	1.4763e+06	1.55796e+06	0	25.12	9	-0.08	-0.152001	-0.723513	0.234682	1676	0.0120676	FALSE	0.900001
2455	High	Master Protein	Q9BVC6	Transmembrane protein 109 OS=Homo sapiens GN=TMEM109 PE=1 SV=1	15.6379	6	24	6	1	243	High	High	0.948	-0.08	4.29803e+06	4.53582e+06	0	58.98	6	-0.08	-0.152001	-0.723513	0.234682	1677	0.0120599	FALSE	0.900001
2456	High	Master Protein	Q9BXS5	AP-1 complex subunit mu-1 OS=Homo sapiens GN=AP1M1 PE=1 SV=3	10.8747	4	4	4	1	423	High	High	0.948	-0.08	601328	634380	0	13.22	4	-0.08	-0.152001	-0.723513	0.234682	1678	0.0120522	FALSE	0.900001
2457	High	Master Protein	P80217	Interferon-induced 35 kDa protein OS=Homo sapiens GN=IFI35 PE=1 SV=5	10.1399	3	5	3	1	286	High	High	0.948	-0.08	351213	370441	0	11.45	3	-0.08	-0.152001	-0.723513	0.234682	1679	0.0120445	FALSE	0.900001
2458	High	Master Protein	Q14185	Dedicator of cytokinesis protein 1 OS=Homo sapiens GN=DOCK1 PE=1 SV=2	1.76944	4	4	3	1	1865	High	High	0.948	-0.08	80270.6	84656.1	0	5.92	4	-0.08	-0.152001	-0.723513	0.234682	1680	0.0120368	FALSE	0.900001
2459	High	Master Protein	P82932	28S ribosomal protein S6, mitochondrial OS=Homo sapiens GN=MRPS6 PE=1 SV=3	16.8	2	3	2	1	125	High	High	0.948	-0.08	133471	140805	0	7.16	2	-0.08	-0.152001	-0.723513	0.234682	1681	0.012029	FALSE	0.900001
2460	High	Master Protein	O00478	Butyrophilin subfamily 3 member A3 OS=Homo sapiens GN=BTN3A3 PE=1 SV=1	5.82192	2	2	2	1	584	High	High	0.948	-0.08	364868	384894	0	5.67	2	-0.08	-0.152001	-0.723513	0.234682	1682	0.0120213	FALSE	0.900001
2461	High	Master Protein	Q10471	Polypeptide N-acetylgalactosaminyltransferase 2 OS=Homo sapiens GN=GALNT2 PE=1 SV=1	31.1734	19	38	18	1	571	High	High	0.947	-0.08	6.98761e+06	7.37558e+06	1	68.01	19	-0.08	-0.152001	-0.723513	0.234682	1683	0.0120136	FALSE	0.900001
2462	High	Master Protein	Q8TCS8	Polyribonucleotide nucleotidyltransferase 1, mitochondrial OS=Homo sapiens GN=PNPT1 PE=1 SV=2	22.7331	14	19	14	1	783	High	High	0.947	-0.08	1.92214e+06	2.02866e+06	0	49.78	14	-0.08	-0.152001	-0.723513	0.234682	1684	0.0120059	FALSE	0.900001
2463	High	Master Protein	Q86VP6	Cullin-associated NEDD8-dissociated protein 1 OS=Homo sapiens GN=CAND1 PE=1 SV=2	9.18699	11	25	11	1	1230	High	High	0.947	-0.08	811038	856720	0	35.97	11	-0.08	-0.152001	-0.723513	0.234682	1685	0.0119981	FALSE	0.900001
2464	High	Master Protein	O00592	Podocalyxin OS=Homo sapiens GN=PODXL PE=1 SV=2	13.0824	7	21	7	1	558	High	High	0.947	-0.08	4.41065e+06	4.65526e+06	0	50	7	-0.08	-0.152001	-0.723513	0.234682	1686	0.0119904	FALSE	0.900001
2465	High	Master Protein	Q8IWA5	Choline transporter-like protein 2 OS=Homo sapiens GN=SLC44A2 PE=1 SV=3	9.34844	5	7	5	1	706	High	High	0.947	-0.08	765955	808570	0	17.97	5	-0.08	-0.152001	-0.723513	0.234682	1687	0.0119827	FALSE	0.900001
2466	High	Master Protein	Q969H8	Myeloid-derived growth factor OS=Homo sapiens GN=MYDGF PE=1 SV=1	15.0289	4	10	4	1	173	High	High	0.947	-0.08	1.08614e+06	1.14661e+06	0	25.47	4	-0.08	-0.152001	-0.723513	0.234682	1688	0.011975	FALSE	0.900001
2467	High	Master Protein	Q96HR9	Receptor expression-enhancing protein 6 OS=Homo sapiens GN=REEP6 PE=1 SV=2	14.6919	3	5	3	1	211	High	High	0.947	-0.08	280561	296257	0	11.09	3	-0.08	-0.152001	-0.723513	0.234682	1689	0.0119673	FALSE	0.900001
2468	High	Master Protein	Q9H6A0	DENN domain-containing protein 2D OS=Homo sapiens GN=DENND2D PE=1 SV=2	6.36943	2	2	2	1	471	High	High	0.947	-0.08	32811.8	34661.2	0	0	2	-0.08	-0.152001	-0.723513	0.234682	1690	0.0119595	FALSE	0.900001
2469	High	Master Protein	Q92979	Ribosomal RNA small subunit methyltransferase NEP1 OS=Homo sapiens GN=EMG1 PE=1 SV=4	13.1148	2	2	2	1	244	High	High	0.947	-0.08	55965.3	59092.5	0	4.42	2	-0.08	-0.152001	-0.723513	0.234682	1691	0.0119518	FALSE	0.900001
2470	High	Master Protein	Q8ND04	Protein SMG8 OS=Homo sapiens GN=SMG8 PE=1 SV=1	3.53179	2	2	2	1	991	High	High	0.947	-0.08	21394.1	22599.5	0	5.91	2	-0.08	-0.152001	-0.723513	0.234682	1692	0.0119441	FALSE	0.900001
2471	High	Master Protein	P48047	ATP synthase subunit O, mitochondrial OS=Homo sapiens GN=ATP5O PE=1 SV=1	49.2958	10	23	10	1	213	High	High	0.946	-0.08	7.61068e+06	8.04748e+06	0	59.05	10	-0.08	-0.152001	-0.723513	0.234682	1693	0.0119364	FALSE	0.900001
2472	High	Master Protein	P01130	Low-density lipoprotein receptor OS=Homo sapiens GN=LDLR PE=1 SV=1	9.18605	7	9	7	1	860	High	High	0.946	-0.08	571858	604378	0	17.26	7	-0.08	-0.152001	-0.723513	0.234682	1694	0.0119287	FALSE	0.900001
2473	High	Master Protein	Q9BU23	Lipase maturation factor 2 OS=Homo sapiens GN=LMF2 PE=1 SV=2	8.20368	5	6	5	1	707	High	High	0.946	-0.08	1.84944e+06	1.95604e+06	0	16.83	5	-0.08	-0.152001	-0.723513	0.234682	1695	0.0119209	FALSE	0.900001
2474	High	Master Protein	Q15629	Translocating chain-associated membrane protein 1 OS=Homo sapiens GN=TRAM1 PE=1 SV=3	13.369	4	7	4	1	374	High	High	0.946	-0.08	1.23353e+06	1.3044e+06	0	21.36	4	-0.08	-0.152001	-0.723513	0.234682	1696	0.0119132	FALSE	0.900001
2475	High	Master Protein	Q9UHR4	Brain-specific angiogenesis inhibitor 1-associated protein 2-like protein 1 OS=Homo sapiens GN=BAIAP2L1 PE=1 SV=2	2.93542	2	2	2	1	511	High	High	0.946	-0.08	113539	119982	0	4.16	2	-0.08	-0.152001	-0.723513	0.234682	1697	0.0119055	FALSE	0.900001
2476	High	Master Protein	Q6UX65	DNA damage-regulated autophagy modulator protein 2 OS=Homo sapiens GN=DRAM2 PE=1 SV=1	8.27068	2	3	2	1	266	High	High	0.946	-0.08	282335	298343	0	9.68	2	-0.08	-0.152001	-0.723513	0.234682	1698	0.0118978	FALSE	0.900001
2477	High	Master Protein	P11216	Glycogen phosphorylase, brain form OS=Homo sapiens GN=PYGB PE=1 SV=5	30.2491	25	39	23	1	843	High	High	0.945	-0.08	2.7202e+06	2.87767e+06	2	83.38	25	-0.08	-0.152001	-0.723513	0.234682	1699	0.0118901	FALSE	0.900001
2478	High	Master Protein	Q92896	Golgi apparatus protein 1 OS=Homo sapiens GN=GLG1 PE=1 SV=2	11.7897	12	18	12	1	1179	High	High	0.945	-0.08	1.8902e+06	2.00044e+06	0	34.56	12	-0.08	-0.152001	-0.723513	0.234682	1700	0.0118823	FALSE	0.900001
2479	High	Master Protein	P35221	Catenin alpha-1 OS=Homo sapiens GN=CTNNA1 PE=1 SV=1	17.66	11	15	11	1	906	High	High	0.945	-0.08	483982	511895	0	33.72	11	-0.08	-0.152001	-0.723513	0.234682	1701	0.0118746	FALSE	0.900001
2480	High	Master Protein	Q15631	Translin OS=Homo sapiens GN=TSN PE=1 SV=1	29.386	6	9	6	1	228	High	High	0.945	-0.08	703907	744875	0	21.66	6	-0.08	-0.152001	-0.723513	0.234682	1702	0.0118669	FALSE	0.900001
2481	High	Master Protein	Q9UIW2	Plexin-A1 OS=Homo sapiens GN=PLXNA1 PE=1 SV=3	2.4789	4	5	4	1	1896	High	High	0.945	-0.08	199233	210807	0	9.06	4	-0.08	-0.152001	-0.723513	0.234682	1703	0.0118592	FALSE	0.900001
2482	High	Master Protein	P30530	Tyrosine-protein kinase receptor UFO OS=Homo sapiens GN=AXL PE=1 SV=3	3.69128	3	3	3	1	894	High	High	0.945	-0.08	206010	217975	0	3.87	3	-0.08	-0.152001	-0.723513	0.234682	1704	0.0118515	FALSE	0.900001
2483	High	Master Protein	Q96D96	Voltage-gated hydrogen channel 1 OS=Homo sapiens GN=HVCN1 PE=1 SV=1	12.4542	3	3	3	1	273	High	High	0.945	-0.08	82039.1	86792.6	0	4.25	3	-0.08	-0.152001	-0.723513	0.234682	1705	0.0118437	FALSE	0.900001
2484	High	Master Protein	O00151	PDZ and LIM domain protein 1 OS=Homo sapiens GN=PDLIM1 PE=1 SV=4	10.3343	3	4	3	1	329	High	High	0.945	-0.08	320165	338889	0	5.39	3	-0.08	-0.152001	-0.723513	0.234682	1706	0.011836	FALSE	0.900001
2485	High	Master Protein	O14662	Syntaxin-16 OS=Homo sapiens GN=STX16 PE=1 SV=3	6.15385	2	2	2	1	325	High	High	0.945	-0.08	102719	108681	0	3.87	2	-0.08	-0.152001	-0.723513	0.234682	1707	0.0118283	FALSE	0.900001
2486	High	Master Protein	Q9UGV2	Protein NDRG3 OS=Homo sapiens GN=NDRG3 PE=1 SV=2	18.9333	5	8	5	1	375	High	High	0.944	-0.08	403801	427665	0	16.3	5	-0.08	-0.152001	-0.723513	0.234682	1708	0.0118206	FALSE	0.900001
2487	High	Master Protein	O14579	Coatomer subunit epsilon OS=Homo sapiens GN=COPE PE=1 SV=3	23.0519	5	5	5	1	308	High	High	0.944	-0.08	140349	148734	0	10.74	5	-0.08	-0.152001	-0.723513	0.234682	1709	0.0118128	FALSE	0.900001
2488	High	Master Protein	P22676	Calretinin OS=Homo sapiens GN=CALB2 PE=2 SV=2	11.0701	3	4	3	1	271	High	High	0.944	-0.08	485976	515034	0	9.67	3	-0.08	-0.152001	-0.723513	0.234682	1710	0.0118051	FALSE	0.900001
2489	High	Master Protein	P78381	UDP-galactose translocator OS=Homo sapiens GN=SLC35A2 PE=1 SV=1	6.31313	2	2	2	1	396	High	High	0.944	-0.08	55252.6	58507.9	0	2.06	2	-0.08	-0.152001	-0.723513	0.234682	1711	0.0117974	FALSE	0.900001
2491	High	Master Protein	P51149	Ras-related protein Rab-7a OS=Homo sapiens GN=RAB7A PE=1 SV=1	60.3865	11	34	11	1	207	High	High	0.943	-0.08	6.60633e+06	7.00527e+06	0	119.45	11	-0.08	-0.152001	-0.723513	0.234682	1712	0.0117897	FALSE	0.900001
2492	High	Master Protein	Q6NVY1	3-hydroxyisobutyryl-CoA hydrolase, mitochondrial OS=Homo sapiens GN=HIBCH PE=1 SV=2	27.7202	10	13	10	1	386	High	High	0.943	-0.08	626032	663918	0	21.45	10	-0.08	-0.152001	-0.723513	0.234682	1713	0.011782	FALSE	0.900001
2493	High	Master Protein	Q9H444	Charged multivesicular body protein 4b OS=Homo sapiens GN=CHMP4B PE=1 SV=1	33.9286	7	11	7	1	224	High	High	0.943	-0.08	2.60616e+06	2.7637e+06	0	24.04	7	-0.08	-0.152001	-0.723513	0.234682	1714	0.0117742	FALSE	0.900001
2494	High	Master Protein	P52907	F-actin-capping protein subunit alpha-1 OS=Homo sapiens GN=CAPZA1 PE=1 SV=3	31.1189	6	13	6	1	286	High	High	0.943	-0.08	911954	966973	0	44.18	6	-0.08	-0.152001	-0.723513	0.234682	1715	0.0117665	FALSE	0.900001
2496	High	Master Protein	P07947	Tyrosine-protein kinase Yes OS=Homo sapiens GN=YES1 PE=1 SV=3	17.4954	9	14	5	1	543	High	High	0.943	-0.08	1.19951e+06	1.2721e+06	3	23.82	9	-0.08	-0.152001	-0.723513	0.234682	1716	0.0117588	FALSE	0.900001
2497	High	Master Protein	Q96Q15	Serine/threonine-protein kinase SMG1 OS=Homo sapiens GN=SMG1 PE=1 SV=3	1.77547	4	4	4	1	3661	High	High	0.943	-0.08	51197	54287.1	0	7.52	4	-0.08	-0.152001	-0.723513	0.234682	1717	0.0117511	FALSE	0.900001
2501	High	Master Protein	Q9HAB8	Phosphopantothenate--cysteine ligase OS=Homo sapiens GN=PPCS PE=1 SV=2	5.78778	2	2	2	1	311	High	High	0.943	-0.08	104674	110955	0	0	2	-0.08	-0.152001	-0.723513	0.234682	1718	0.0117434	FALSE	0.900001
2502	High	Master Protein	Q13825	Methylglutaconyl-CoA hydratase, mitochondrial OS=Homo sapiens GN=AUH PE=1 SV=1	5.89971	2	2	2	1	339	High	High	0.943	-0.08	202768	214964	0	2.01	2	-0.08	-0.152001	-0.723513	0.234682	1719	0.0117356	FALSE	0.900001
2387	High	Master Protein	P05023	Sodium/potassium-transporting ATPase subunit alpha-1 OS=Homo sapiens GN=ATP1A1 PE=1 SV=1	41.9355	42	168	25	1	1023	High	High	0.956	-0.07	2.73683e+07	2.86393e+07	21	484.47	42	-0.07	-0.142001	-0.676527	0.249353	1568	0.0129015	FALSE	0.906261
2391	High	Master Protein	Q9NQW6	Anillin OS=Homo sapiens GN=ANLN PE=1 SV=2	4.80427	6	8	6	1	1124	High	High	0.956	-0.07	639193	668731	0	15.08	6	-0.07	-0.142001	-0.676527	0.249353	1569	0.0128938	FALSE	0.906261
2392	High	Master Protein	Q96SQ9	Cytochrome P450 2S1 OS=Homo sapiens GN=CYP2S1 PE=1 SV=2	9.52381	4	5	4	1	504	High	High	0.956	-0.07	49345.9	51644	0	4.53	4	-0.07	-0.142001	-0.676527	0.249353	1570	0.012886	FALSE	0.906261
2395	High	Master Protein	P51636	Caveolin-2 OS=Homo sapiens GN=CAV2 PE=1 SV=2	18.5185	2	4	2	1	162	High	High	0.956	-0.07	306754	321038	0	15.37	2	-0.07	-0.142001	-0.676527	0.249353	1571	0.0128783	FALSE	0.906261
2397	High	Master Protein	Q9HA77	Probable cysteine--tRNA ligase, mitochondrial OS=Homo sapiens GN=CARS2 PE=1 SV=1	17.1986	7	12	7	1	564	High	High	0.955	-0.07	933853	978066	0	21.7	7	-0.07	-0.142001	-0.676527	0.249353	1572	0.0128706	FALSE	0.906261
2398	High	Master Protein	Q9Y266	Nuclear migration protein nudC OS=Homo sapiens GN=NUDC PE=1 SV=1	16.3142	6	6	6	1	331	High	High	0.955	-0.07	372814	390239	0	10.82	6	-0.07	-0.142001	-0.676527	0.249353	1573	0.0128629	FALSE	0.906261
2399	High	Master Protein	Q9H3S7	Tyrosine-protein phosphatase non-receptor type 23 OS=Homo sapiens GN=PTPN23 PE=1 SV=1	5.4401	6	8	6	1	1636	High	High	0.955	-0.07	300236	314530	0	16.06	6	-0.07	-0.142001	-0.676527	0.249353	1574	0.0128552	FALSE	0.906261
2400	High	Master Protein	P15586	N-acetylglucosamine-6-sulfatase OS=Homo sapiens GN=GNS PE=1 SV=3	11.9565	5	16	5	1	552	High	High	0.955	-0.07	1.67453e+06	1.75254e+06	0	39.49	5	-0.07	-0.142001	-0.676527	0.249353	1575	0.0128474	FALSE	0.906261
2401	High	Master Protein	Q9UJX3	Anaphase-promoting complex subunit 7 OS=Homo sapiens GN=ANAPC7 PE=1 SV=4	6.17696	3	4	3	1	599	High	High	0.955	-0.07	82194.3	86075.6	0	6.48	3	-0.07	-0.142001	-0.676527	0.249353	1576	0.0128397	FALSE	0.906261
2402	High	Master Protein	Q9BRA2	Thioredoxin domain-containing protein 17 OS=Homo sapiens GN=TXNDC17 PE=1 SV=1	25.2033	3	4	3	1	123	High	High	0.955	-0.07	547738	573373	0	7.43	3	-0.07	-0.142001	-0.676527	0.249353	1577	0.012832	FALSE	0.906261
2403	High	Master Protein	Q96D31	Calcium release-activated calcium channel protein 1 OS=Homo sapiens GN=ORAI1 PE=1 SV=2	6.97674	2	4	2	1	301	High	High	0.955	-0.07	36747.8	38487.9	0	1.65	2	-0.07	-0.142001	-0.676527	0.249353	1578	0.0128243	FALSE	0.906261
2404	High	Master Protein	Q9HAT2	Sialate O-acetylesterase OS=Homo sapiens GN=SIAE PE=1 SV=1	2.86807	2	3	2	1	523	High	High	0.955	-0.07	132255	138425	0	4.97	2	-0.07	-0.142001	-0.676527	0.249353	1579	0.0128166	FALSE	0.906261
2405	High	Master Protein	P34897	Serine hydroxymethyltransferase, mitochondrial OS=Homo sapiens GN=SHMT2 PE=1 SV=3	38.2937	16	49	15	1	504	High	High	0.954	-0.07	8.49584e+06	8.90724e+06	1	130.42	16	-0.07	-0.142001	-0.676527	0.249353	1580	0.0128088	FALSE	0.906261
2406	High	Master Protein	P55145	Mesencephalic astrocyte-derived neurotrophic factor OS=Homo sapiens GN=MANF PE=1 SV=3	34.0659	11	27	11	1	182	High	High	0.954	-0.07	6.96405e+06	7.29728e+06	0	71.56	11	-0.07	-0.142001	-0.676527	0.249353	1581	0.0128011	FALSE	0.906261
2407	High	Master Protein	Q15417	Calponin-3 OS=Homo sapiens GN=CNN3 PE=1 SV=1	22.7964	6	8	5	1	329	High	High	0.954	-0.07	1.18914e+06	1.24639e+06	1	20.24	6	-0.07	-0.142001	-0.676527	0.249353	1582	0.0127934	FALSE	0.906261
2408	High	Master Protein	Q9UNZ2	NSFL1 cofactor p47 OS=Homo sapiens GN=NSFL1C PE=1 SV=2	15.4054	5	9	5	1	370	High	High	0.954	-0.07	168261	176433	0	16.42	5	-0.07	-0.142001	-0.676527	0.249353	1583	0.0127857	FALSE	0.906261
2409	High	Master Protein	Q07817	Bcl-2-like protein 1 OS=Homo sapiens GN=BCL2L1 PE=1 SV=1	11.1588	3	9	3	1	233	High	High	0.954	-0.07	919587	964142	0	16.33	3	-0.07	-0.142001	-0.676527	0.249353	1584	0.0127779	FALSE	0.906261
2410	High	Master Protein	P05091	Aldehyde dehydrogenase, mitochondrial OS=Homo sapiens GN=ALDH2 PE=1 SV=2	42.5532	22	60	21	1	517	High	High	0.953	-0.07	1.38305e+07	1.45151e+07	1	148.82	22	-0.07	-0.142001	-0.676527	0.249353	1585	0.0127702	FALSE	0.906261
2411	High	Master Protein	Q9NVI7	ATPase family AAA domain-containing protein 3A OS=Homo sapiens GN=ATAD3A PE=1 SV=2	45.5836	28	56	12	1	634	High	High	0.953	-0.07	7.26236e+06	7.61982e+06	17	126.65	28	-0.07	-0.142001	-0.676527	0.249353	1586	0.0127625	FALSE	0.906261
2412	High	Master Protein	O75746	Calcium-binding mitochondrial carrier protein Aralar1 OS=Homo sapiens GN=SLC25A12 PE=1 SV=2	21.2389	13	27	8	1	678	High	High	0.953	-0.07	1.2482e+06	1.30912e+06	0	80.03	13	-0.07	-0.142001	-0.676527	0.249353	1587	0.0127548	FALSE	0.906261
2413	High	Master Protein	O43493	Trans-Golgi network integral membrane protein 2 OS=Homo sapiens GN=TGOLN2 PE=1 SV=2	10.4167	5	8	5	1	480	High	High	0.953	-0.07	449165	471365	0	8.95	5	-0.07	-0.142001	-0.676527	0.249353	1588	0.0127471	FALSE	0.906261
2414	High	Master Protein	Q16204	Coiled-coil domain-containing protein 6 OS=Homo sapiens GN=CCDC6 PE=1 SV=2	12.2363	5	5	5	1	474	High	High	0.953	-0.07	195640	205288	0	7.22	5	-0.07	-0.142001	-0.676527	0.249353	1589	0.0127393	FALSE	0.906261
2415	High	Master Protein	Q9HB90	Ras-related GTP-binding protein C OS=Homo sapiens GN=RRAGC PE=1 SV=1	14.2857	5	10	5	1	399	High	High	0.953	-0.07	882545	926204	0	14.07	5	-0.07	-0.142001	-0.676527	0.249353	1590	0.0127316	FALSE	0.906261
2416	High	Master Protein	O60664	Perilipin-3 OS=Homo sapiens GN=PLIN3 PE=1 SV=3	14.7465	5	12	5	1	434	High	High	0.953	-0.07	909728	954961	0	34.04	5	-0.07	-0.142001	-0.676527	0.249353	1591	0.0127239	FALSE	0.906261
2417	High	Master Protein	Q9NR46	Endophilin-B2 OS=Homo sapiens GN=SH3GLB2 PE=1 SV=1	7.59494	4	6	3	1	395	High	High	0.953	-0.07	868833	911635	1	13.17	4	-0.07	-0.142001	-0.676527	0.249353	1592	0.0127162	FALSE	0.906261
2418	High	Master Protein	P67809	Nuclease-sensitive element-binding protein 1 OS=Homo sapiens GN=YBX1 PE=1 SV=3	19.1358	3	5	3	1	324	High	High	0.953	-0.07	170134	178566	0	14.44	3	-0.07	-0.142001	-0.676527	0.249353	1593	0.0127085	FALSE	0.906261
2419	High	Master Protein	P49419	Alpha-aminoadipic semialdehyde dehydrogenase OS=Homo sapiens GN=ALDH7A1 PE=1 SV=5	43.2282	21	40	21	1	539	High	High	0.952	-0.07	4.71435e+06	4.95295e+06	0	109.77	21	-0.07	-0.142001	-0.676527	0.249353	1594	0.0127007	FALSE	0.906261
2420	High	Master Protein	P52789	Hexokinase-2 OS=Homo sapiens GN=HK2 PE=1 SV=2	19.8473	16	31	14	1	917	High	High	0.952	-0.07	1.85771e+06	1.95195e+06	0	67.96	16	-0.07	-0.142001	-0.676527	0.249353	1595	0.012693	FALSE	0.906261
2421	High	Master Protein	P15311	Ezrin OS=Homo sapiens GN=EZR PE=1 SV=4	34.1297	25	55	13	1	586	High	High	0.952	-0.07	2.35315e+06	2.47119e+06	0	126.16	25	-0.07	-0.142001	-0.676527	0.249353	1596	0.0126853	FALSE	0.906261
2422	High	Master Protein	Q02127	Dihydroorotate dehydrogenase (quinone), mitochondrial OS=Homo sapiens GN=DHODH PE=1 SV=3	24.0506	8	15	8	1	395	High	High	0.952	-0.07	1.25236e+06	1.3159e+06	0	37.53	8	-0.07	-0.142001	-0.676527	0.249353	1597	0.0126776	FALSE	0.906261
2423	High	Master Protein	Q53EZ4	Centrosomal protein of 55 kDa OS=Homo sapiens GN=CEP55 PE=1 SV=3	16.1638	7	7	7	1	464	High	High	0.952	-0.07	258265	271218	0	8.95	7	-0.07	-0.142001	-0.676527	0.249353	1598	0.0126699	FALSE	0.906261
2424	High	Master Protein	Q99598	Translin-associated protein X OS=Homo sapiens GN=TSNAX PE=1 SV=1	16.2069	3	3	3	1	290	High	High	0.952	-0.07	25182	26460.7	0	2.31	3	-0.07	-0.142001	-0.676527	0.249353	1599	0.0126621	FALSE	0.906261
2425	High	Master Protein	Q8WZ82	Esterase OVCA2 OS=Homo sapiens GN=OVCA2 PE=1 SV=1	9.69163	2	2	2	1	227	High	High	0.952	-0.07	29435.7	30932	0	3.77	2	-0.07	-0.142001	-0.676527	0.249353	1600	0.0126544	FALSE	0.906261
2426	High	Master Protein	Q14108	Lysosome membrane protein 2 OS=Homo sapiens GN=SCARB2 PE=1 SV=2	21.1297	11	25	11	1	478	High	High	0.951	-0.07	4.76234e+06	5.00951e+06	0	53.98	11	-0.07	-0.142001	-0.676527	0.249353	1601	0.0126467	FALSE	0.906261
2427	High	Master Protein	P49755	Transmembrane emp24 domain-containing protein 10 OS=Homo sapiens GN=TMED10 PE=1 SV=2	41.0959	11	49	11	1	219	High	High	0.951	-0.07	1.11026e+07	1.16728e+07	0	109.49	11	-0.07	-0.142001	-0.676527	0.249353	1602	0.012639	FALSE	0.906261
2428	High	Master Protein	Q9NYL9	Tropomodulin-3 OS=Homo sapiens GN=TMOD3 PE=1 SV=1	33.8068	10	22	10	1	352	High	High	0.951	-0.07	1.37193e+06	1.44319e+06	0	53.21	10	-0.07	-0.142001	-0.676527	0.249353	1603	0.0126313	FALSE	0.906261
2429	High	Master Protein	Q4G0N4	NAD kinase 2, mitochondrial OS=Homo sapiens GN=NADK2 PE=1 SV=2	18.0995	7	12	7	1	442	High	High	0.951	-0.07	596618	627237	0	23.84	7	-0.07	-0.142001	-0.676527	0.249353	1604	0.0126235	FALSE	0.906261
2430	High	Master Protein	P26440	Isovaleryl-CoA dehydrogenase, mitochondrial OS=Homo sapiens GN=IVD PE=1 SV=1	16.0757	7	12	7	1	423	High	High	0.951	-0.07	1.87847e+06	1.97491e+06	0	14.9	7	-0.07	-0.142001	-0.676527	0.249353	1605	0.0126158	FALSE	0.906261
2431	High	Master Protein	Q96RL7	Vacuolar protein sorting-associated protein 13A OS=Homo sapiens GN=VPS13A PE=1 SV=2	1.5753	5	5	5	1	3174	High	High	0.951	-0.07	276442	290552	0	2.33	5	-0.07	-0.142001	-0.676527	0.249353	1606	0.0126081	FALSE	0.906261
2432	High	Master Protein	Q14789	Golgin subfamily B member 1 OS=Homo sapiens GN=GOLGB1 PE=1 SV=2	1.90242	4	4	4	1	3259	High	High	0.951	-0.07	57435.2	60402.2	0	7.86	4	-0.07	-0.142001	-0.676527	0.249353	1607	0.0126004	FALSE	0.906261
2433	High	Master Protein	O14773	Tripeptidyl-peptidase 1 OS=Homo sapiens GN=TPP1 PE=1 SV=2	2.48668	2	2	2	1	563	High	High	0.951	-0.07	388153	408125	0	2.05	2	-0.07	-0.142001	-0.676527	0.249353	1608	0.0125926	FALSE	0.906261
2434	High	Master Protein	P51608	Methyl-CpG-binding protein 2 OS=Homo sapiens GN=MECP2 PE=1 SV=1	5.96708	2	2	2	1	486	High	High	0.951	-0.07	89700.9	94328	0	0	2	-0.07	-0.142001	-0.676527	0.249353	1609	0.0125849	FALSE	0.906261
2435	High	Master Protein	Q15363	Transmembrane emp24 domain-containing protein 2 OS=Homo sapiens GN=TMED2 PE=1 SV=1	33.3333	7	42	7	1	201	High	High	0.95	-0.07	2.75142e+06	2.89774e+06	0	95.6	7	-0.07	-0.142001	-0.676527	0.249353	1610	0.0125772	FALSE	0.906261
2436	High	Master Protein	Q9BRK5	45 kDa calcium-binding protein OS=Homo sapiens GN=SDF4 PE=1 SV=1	20.1657	7	9	7	1	362	High	High	0.95	-0.07	645444	679667	0	25.96	7	-0.07	-0.142001	-0.676527	0.249353	1611	0.0125695	FALSE	0.906261
2437	High	Master Protein	P11166	Solute carrier family 2, facilitated glucose transporter member 1 OS=Homo sapiens GN=SLC2A1 PE=1 SV=2	7.31707	5	18	5	1	492	High	High	0.95	-0.07	2.43753e+06	2.56531e+06	0	41.09	5	-0.07	-0.142001	-0.676527	0.249353	1612	0.0125618	FALSE	0.906261
2438	High	Master Protein	P09467	Fructose-1,6-bisphosphatase 1 OS=Homo sapiens GN=FBP1 PE=1 SV=5	11.5385	3	3	3	1	338	High	High	0.95	-0.07	137719	144992	0	2.76	3	-0.07	-0.142001	-0.676527	0.249353	1613	0.012554	FALSE	0.906261
2439	High	Master Protein	Q9HBR0	Putative sodium-coupled neutral amino acid transporter 10 OS=Homo sapiens GN=SLC38A10 PE=1 SV=2	3.66399	3	3	3	1	1119	High	High	0.95	-0.07	112078	117933	0	2.24	3	-0.07	-0.142001	-0.676527	0.249353	1614	0.0125463	FALSE	0.906261
2440	High	Master Protein	Q5T013	Putative hydroxypyruvate isomerase OS=Homo sapiens GN=HYI PE=1 SV=2	11.9134	2	3	2	1	277	High	High	0.95	-0.07	21414.3	22544.5	0	4.76	2	-0.07	-0.142001	-0.676527	0.249353	1615	0.0125386	FALSE	0.906261
2441	High	Master Protein	Q8N9N7	Leucine-rich repeat-containing protein 57 OS=Homo sapiens GN=LRRC57 PE=1 SV=1	9.62343	2	2	2	1	239	High	High	0.95	-0.07	63645.1	66965.5	0	2.34	2	-0.07	-0.142001	-0.676527	0.249353	1616	0.0125309	FALSE	0.906261
2442	High	Master Protein	Q9BY50	Signal peptidase complex catalytic subunit SEC11C OS=Homo sapiens GN=SEC11C PE=1 SV=3	7.8125	2	2	2	1	192	High	High	0.95	-0.07	180791	190329	0	2.04	2	-0.07	-0.142001	-0.676527	0.249353	1617	0.0125232	FALSE	0.906261
2443	High	Master Protein	Q86U42	Polyadenylate-binding protein 2 OS=Homo sapiens GN=PABPN1 PE=1 SV=3	3.26797	2	3	2	1	306	High	High	0.95	-0.07	290695	305889	0	2.1	2	-0.07	-0.142001	-0.676527	0.249353	1618	0.0125154	FALSE	0.906261
2447	High	Master Protein	P30566	Adenylosuccinate lyase OS=Homo sapiens GN=ADSL PE=1 SV=2	18.595	7	12	7	1	484	High	High	0.949	-0.07	524345	552258	0	22.95	7	-0.07	-0.142001	-0.676527	0.249353	1619	0.0125077	FALSE	0.906261
2448	High	Master Protein	P52565	Rho GDP-dissociation inhibitor 1 OS=Homo sapiens GN=ARHGDIA PE=1 SV=3	19.1176	4	13	4	1	204	High	High	0.949	-0.07	1.98132e+06	2.08673e+06	0	24.19	4	-0.07	-0.142001	-0.676527	0.249353	1620	0.0125	FALSE	0.906261
2340	High	Master Protein	Q13409	Cytoplasmic dynein 1 intermediate chain 2 OS=Homo sapiens GN=DYNC1I2 PE=1 SV=3	16.6144	10	13	10	1	638	High	High	0.962	-0.06	1.10384e+06	1.14687e+06	0	25.83	10	-0.06	-0.132001	-0.629541	0.264497	1457	0.0137585	FALSE	0.912565
2341	High	Master Protein	Q8TC12	Retinol dehydrogenase 11 OS=Homo sapiens GN=RDH11 PE=1 SV=2	25.1572	7	11	7	1	318	High	High	0.962	-0.06	1.64138e+06	1.70683e+06	0	21.77	7	-0.06	-0.132001	-0.629541	0.264497	1458	0.0137508	FALSE	0.912565
2342	High	Master Protein	Q93050	V-type proton ATPase 116 kDa subunit a isoform 1 OS=Homo sapiens GN=ATP6V0A1 PE=1 SV=3	11.1111	7	12	6	1	837	High	High	0.962	-0.06	858448	892563	0	25.97	7	-0.06	-0.132001	-0.629541	0.264497	1459	0.0137431	FALSE	0.912565
2343	High	Master Protein	Q03154	Aminoacylase-1 OS=Homo sapiens GN=ACY1 PE=1 SV=1	8.57843	3	3	3	1	408	High	High	0.962	-0.06	175956	182942	0	1.78	3	-0.06	-0.132001	-0.629541	0.264497	1460	0.0137353	FALSE	0.912565
2344	High	Master Protein	Q9Y697	Cysteine desulfurase, mitochondrial OS=Homo sapiens GN=NFS1 PE=1 SV=3	25.8206	9	11	9	1	457	High	High	0.961	-0.06	1.25546e+06	1.30613e+06	0	22.73	9	-0.06	-0.132001	-0.629541	0.264497	1461	0.0137276	FALSE	0.912565
2345	High	Master Protein	P29992	Guanine nucleotide-binding protein subunit alpha-11 OS=Homo sapiens GN=GNA11 PE=1 SV=2	13.3705	6	14	6	1	359	High	High	0.961	-0.06	1.4064e+06	1.46357e+06	0	27.19	6	-0.06	-0.132001	-0.629541	0.264497	1462	0.0137199	FALSE	0.912565
2346	High	Master Protein	Q16401	26S proteasome non-ATPase regulatory subunit 5 OS=Homo sapiens GN=PSMD5 PE=1 SV=3	8.53175	5	9	5	1	504	High	High	0.961	-0.06	691295	719715	0	20.43	5	-0.06	-0.132001	-0.629541	0.264497	1463	0.0137122	FALSE	0.912565
2347	High	Master Protein	P20674	Cytochrome c oxidase subunit 5A, mitochondrial OS=Homo sapiens GN=COX5A PE=1 SV=2	36.6667	5	8	5	1	150	High	High	0.961	-0.06	3.53145e+06	3.67635e+06	0	18.22	5	-0.06	-0.132001	-0.629541	0.264497	1464	0.0137044	FALSE	0.912565
2348	High	Master Protein	Q14457	Beclin-1 OS=Homo sapiens GN=BECN1 PE=1 SV=2	6.22222	3	3	3	1	450	High	High	0.961	-0.06	79654.5	82852.2	0	2.38	3	-0.06	-0.132001	-0.629541	0.264497	1465	0.0136967	FALSE	0.912565
2349	High	Master Protein	P61020	Ras-related protein Rab-5B OS=Homo sapiens GN=RAB5B PE=1 SV=1	31.1628	5	23	3	1	215	High	High	0.961	-0.06	795091	827159	0	75.26	5	-0.06	-0.132001	-0.629541	0.264497	1466	0.013689	FALSE	0.912565
2350	High	Master Protein	Q8N4L2	Type 2 phosphatidylinositol 4,5-bisphosphate 4-phosphatase OS=Homo sapiens GN=TMEM55A PE=1 SV=1	25.6809	4	7	3	1	257	High	High	0.961	-0.06	154283	160623	0	15.87	4	-0.06	-0.132001	-0.629541	0.264497	1467	0.0136813	FALSE	0.912565
2351	High	Master Protein	O75475	PC4 and SFRS1-interacting protein OS=Homo sapiens GN=PSIP1 PE=1 SV=1	6.22642	3	4	3	1	530	High	High	0.961	-0.06	174828	181948	0	4.22	3	-0.06	-0.132001	-0.629541	0.264497	1468	0.0136736	FALSE	0.912565
2352	High	Master Protein	Q9HA65	TBC1 domain family member 17 OS=Homo sapiens GN=TBC1D17 PE=1 SV=2	2.9321	2	2	2	1	648	High	High	0.961	-0.06	224535	233683	0	4.66	2	-0.06	-0.132001	-0.629541	0.264497	1469	0.0136658	FALSE	0.912565
2353	High	Master Protein	O75410	Transforming acidic coiled-coil-containing protein 1 OS=Homo sapiens GN=TACC1 PE=1 SV=2	2.48447	2	2	2	1	805	High	High	0.961	-0.06	29687.4	30879.5	0	1.64	2	-0.06	-0.132001	-0.629541	0.264497	1470	0.0136581	FALSE	0.912565
2354	High	Master Protein	P49748	Very long-chain specific acyl-CoA dehydrogenase, mitochondrial OS=Homo sapiens GN=ACADVL PE=1 SV=1	43.6641	26	48	26	1	655	High	High	0.96	-0.06	7.98656e+06	8.31613e+06	0	120.51	26	-0.06	-0.132001	-0.629541	0.264497	1471	0.0136504	FALSE	0.912565
2355	High	Master Protein	Q9BTU6	Phosphatidylinositol 4-kinase type 2-alpha OS=Homo sapiens GN=PI4K2A PE=1 SV=1	18.5804	9	14	9	1	479	High	High	0.96	-0.06	2.05086e+06	2.13527e+06	0	34.66	9	-0.06	-0.132001	-0.629541	0.264497	1472	0.0136427	FALSE	0.912565
2356	High	Master Protein	Q14696	LDLR chaperone MESD OS=Homo sapiens GN=MESDC2 PE=1 SV=2	33.3333	9	10	9	1	234	High	High	0.96	-0.06	1.43213e+06	1.49133e+06	0	18.01	9	-0.06	-0.132001	-0.629541	0.264497	1473	0.013635	FALSE	0.912565
2357	High	Master Protein	Q9NUJ1	Mycophenolic acid acyl-glucuronide esterase, mitochondrial OS=Homo sapiens GN=ABHD10 PE=1 SV=1	18.3007	6	10	6	1	306	High	High	0.96	-0.06	1.54603e+06	1.61108e+06	0	27.86	6	-0.06	-0.132001	-0.629541	0.264497	1474	0.0136272	FALSE	0.912565
2358	High	Master Protein	Q5JVF3	PCI domain-containing protein 2 OS=Homo sapiens GN=PCID2 PE=1 SV=2	4.01003	2	2	2	1	399	High	High	0.96	-0.06	44354.1	46208.9	0	2.99	2	-0.06	-0.132001	-0.629541	0.264497	1475	0.0136195	FALSE	0.912565
2359	High	Master Protein	P08559	Pyruvate dehydrogenase E1 component subunit alpha, somatic form, mitochondrial OS=Homo sapiens GN=PDHA1 PE=1 SV=3	41.7949	18	36	18	1	390	High	High	0.959	-0.06	5.53052e+06	5.76704e+06	0	77.13	18	-0.06	-0.132001	-0.629541	0.264497	1476	0.0136118	FALSE	0.912565
2360	High	Master Protein	Q9H936	Mitochondrial glutamate carrier 1 OS=Homo sapiens GN=SLC25A22 PE=1 SV=1	32.8173	8	18	8	1	323	High	High	0.959	-0.06	4.28083e+06	4.46364e+06	0	65.92	8	-0.06	-0.132001	-0.629541	0.264497	1477	0.0136041	FALSE	0.912565
2361	High	Master Protein	Q15435	Protein phosphatase 1 regulatory subunit 7 OS=Homo sapiens GN=PPP1R7 PE=1 SV=1	15.5556	5	6	5	1	360	High	High	0.959	-0.06	437659	456353	0	13.02	5	-0.06	-0.132001	-0.629541	0.264497	1478	0.0135964	FALSE	0.912565
2362	High	Master Protein	Q9BSF4	Mitochondrial import inner membrane translocase subunit Tim29 OS=Homo sapiens GN=TIMM29 PE=1 SV=2	15	3	4	3	1	260	High	High	0.959	-0.06	919586	959259	0	10.67	3	-0.06	-0.132001	-0.629541	0.264497	1479	0.0135886	FALSE	0.912565
2363	High	Master Protein	Q8NCW5	NAD(P)H-hydrate epimerase OS=Homo sapiens GN=NAXE PE=1 SV=2	15.625	3	3	3	1	288	High	High	0.959	-0.06	226647	236391	0	9.99	3	-0.06	-0.132001	-0.629541	0.264497	1480	0.0135809	FALSE	0.912565
2364	High	Master Protein	O94766	Galactosylgalactosylxylosylprotein 3-beta-glucuronosyltransferase 3 OS=Homo sapiens GN=B3GAT3 PE=1 SV=2	8.0597	3	8	3	1	335	High	High	0.959	-0.06	246281	256790	0	11.49	3	-0.06	-0.132001	-0.629541	0.264497	1481	0.0135732	FALSE	0.912565
2365	High	Master Protein	Q9NYB9	Abl interactor 2 OS=Homo sapiens GN=ABI2 PE=1 SV=1	2.92398	2	3	2	1	513	High	High	0.959	-0.06	405837	423164	0	5.25	2	-0.06	-0.132001	-0.629541	0.264497	1482	0.0135655	FALSE	0.912565
2366	High	Master Protein	O60869	Endothelial differentiation-related factor 1 OS=Homo sapiens GN=EDF1 PE=1 SV=1	11.4865	2	3	2	1	148	High	High	0.959	-0.06	753989	786577	0	3.96	2	-0.06	-0.132001	-0.629541	0.264497	1483	0.0135578	FALSE	0.912565
2367	High	Master Protein	Q9NRF8	CTP synthase 2 OS=Homo sapiens GN=CTPS2 PE=1 SV=1	8.02048	4	4	2	1	586	High	High	0.959	-0.06	65822.4	68601.4	0	4.99	4	-0.06	-0.132001	-0.629541	0.264497	1484	0.01355	FALSE	0.912565
2368	High	Master Protein	P49757	Protein numb homolog OS=Homo sapiens GN=NUMB PE=1 SV=2	1.84332	2	2	2	1	651	High	High	0.959	-0.06	208964	217836	0	3.58	2	-0.06	-0.132001	-0.629541	0.264497	1485	0.0135423	FALSE	0.912565
2369	High	Master Protein	P13797	Plastin-3 OS=Homo sapiens GN=PLS3 PE=1 SV=4	37.7778	21	36	21	1	630	High	High	0.958	-0.06	4.78095e+06	4.99123e+06	0	84.82	21	-0.06	-0.132001	-0.629541	0.264497	1486	0.0135346	FALSE	0.912565
2370	High	Master Protein	P12429	Annexin A3 OS=Homo sapiens GN=ANXA3 PE=1 SV=3	53.2508	19	37	19	1	323	High	High	0.958	-0.06	4.89218e+06	5.10928e+06	0	72.25	19	-0.06	-0.132001	-0.629541	0.264497	1487	0.0135269	FALSE	0.912565
2371	High	Master Protein	P62937	Peptidyl-prolyl cis-trans isomerase A OS=Homo sapiens GN=PPIA PE=1 SV=2	83.6364	15	88	15	1	165	High	High	0.958	-0.06	3.9244e+07	4.09555e+07	0	186.17	15	-0.06	-0.132001	-0.629541	0.264497	1488	0.0135191	FALSE	0.912565
2372	High	Master Protein	Q15005	Signal peptidase complex subunit 2 OS=Homo sapiens GN=SPCS2 PE=1 SV=3	35.8407	10	14	10	1	226	High	High	0.958	-0.06	3.76843e+06	3.93468e+06	0	24.51	10	-0.06	-0.132001	-0.629541	0.264497	1489	0.0135114	FALSE	0.912565
2373	High	Master Protein	Q99729	Heterogeneous nuclear ribonucleoprotein A/B OS=Homo sapiens GN=HNRNPAB PE=1 SV=2	17.7711	6	21	5	1	332	High	High	0.958	-0.06	1.80916e+06	1.88813e+06	0	48.05	6	-0.06	-0.132001	-0.629541	0.264497	1490	0.0135037	FALSE	0.912565
2374	High	Master Protein	P49768	Presenilin-1 OS=Homo sapiens GN=PSEN1 PE=1 SV=1	9.42184	3	3	3	1	467	High	High	0.958	-0.06	217983	227546	0	5.23	3	-0.06	-0.132001	-0.629541	0.264497	1491	0.013496	FALSE	0.912565
2375	High	Master Protein	Q01433	AMP deaminase 2 OS=Homo sapiens GN=AMPD2 PE=1 SV=2	3.75427	3	5	3	1	879	High	High	0.958	-0.06	113421	118421	0	11.09	3	-0.06	-0.132001	-0.629541	0.264497	1492	0.0134883	FALSE	0.912565
2376	High	Master Protein	O15439	Multidrug resistance-associated protein 4 OS=Homo sapiens GN=ABCC4 PE=1 SV=3	2.11321	3	4	3	1	1325	High	High	0.958	-0.06	168641	175958	0	8.27	3	-0.06	-0.132001	-0.629541	0.264497	1493	0.0134805	FALSE	0.912565
2377	High	Master Protein	Q9NPJ3	Acyl-coenzyme A thioesterase 13 OS=Homo sapiens GN=ACOT13 PE=1 SV=1	16.4286	2	4	2	1	140	High	High	0.958	-0.06	502555	524426	0	12.22	2	-0.06	-0.132001	-0.629541	0.264497	1494	0.0134728	FALSE	0.912565
2378	High	Master Protein	P61619	Protein transport protein Sec61 subunit alpha isoform 1 OS=Homo sapiens GN=SEC61A1 PE=1 SV=2	33.4034	12	28	12	1	476	High	High	0.957	-0.06	5.00822e+06	5.23421e+06	0	56.05	12	-0.06	-0.132001	-0.629541	0.264497	1495	0.0134651	FALSE	0.912565
2379	High	Master Protein	P36542	ATP synthase subunit gamma, mitochondrial OS=Homo sapiens GN=ATP5C1 PE=1 SV=1	26.8456	10	34	10	1	298	High	High	0.957	-0.06	9.69078e+06	1.01224e+07	0	60.87	10	-0.06	-0.132001	-0.629541	0.264497	1496	0.0134574	FALSE	0.912565
2380	High	Master Protein	Q15436	Protein transport protein Sec23A OS=Homo sapiens GN=SEC23A PE=1 SV=2	19.3464	11	15	9	1	765	High	High	0.957	-0.06	511577	534445	0	41.39	11	-0.06	-0.132001	-0.629541	0.264497	1497	0.0134497	FALSE	0.912565
2381	High	Master Protein	P08236	Beta-glucuronidase OS=Homo sapiens GN=GUSB PE=1 SV=2	5.83717	5	7	5	1	651	High	High	0.957	-0.06	686488	717037	0	3.54	5	-0.06	-0.132001	-0.629541	0.264497	1498	0.0134419	FALSE	0.912565
2382	High	Master Protein	P08574	Cytochrome c1, heme protein, mitochondrial OS=Homo sapiens GN=CYC1 PE=1 SV=3	16	4	15	4	1	325	High	High	0.957	-0.06	3.3958e+06	3.54973e+06	0	40.71	4	-0.06	-0.132001	-0.629541	0.264497	1499	0.0134342	FALSE	0.912565
2383	High	Master Protein	P46926	Glucosamine-6-phosphate isomerase 1 OS=Homo sapiens GN=GNPDA1 PE=1 SV=1	20.4152	4	5	4	1	289	High	High	0.957	-0.06	555964	580769	0	17.02	4	-0.06	-0.132001	-0.629541	0.264497	1500	0.0134265	FALSE	0.912565
2384	High	Master Protein	P24534	Elongation factor 1-beta OS=Homo sapiens GN=EEF1B2 PE=1 SV=3	21.3333	7	8	3	1	225	High	High	0.957	-0.06	1.16664e+06	1.21854e+06	0	15.17	7	-0.06	-0.132001	-0.629541	0.264497	1501	0.0134188	FALSE	0.912565
2385	High	Master Protein	Q16610	Extracellular matrix protein 1 OS=Homo sapiens GN=ECM1 PE=1 SV=2	5	2	2	2	1	540	High	High	0.957	-0.06	15614.7	16308.2	0	4.3	2	-0.06	-0.132001	-0.629541	0.264497	1502	0.0134111	FALSE	0.912565
2386	High	Master Protein	P27797	Calreticulin OS=Homo sapiens GN=CALR PE=1 SV=1	65.2278	28	125	28	1	417	High	High	0.956	-0.06	3.39434e+07	3.5507e+07	0	280.1	28	-0.06	-0.132001	-0.629541	0.264497	1503	0.0134033	FALSE	0.912565
2388	High	Master Protein	Q9H845	Acyl-CoA dehydrogenase family member 9, mitochondrial OS=Homo sapiens GN=ACAD9 PE=1 SV=1	30.4348	19	38	19	1	621	High	High	0.956	-0.06	5.98269e+06	6.25782e+06	0	82.75	19	-0.06	-0.132001	-0.629541	0.264497	1504	0.0133956	FALSE	0.912565
2389	High	Master Protein	P61160	Actin-related protein 2 OS=Homo sapiens GN=ACTR2 PE=1 SV=1	23.6041	10	16	10	1	394	High	High	0.956	-0.06	3.11488e+06	3.25792e+06	0	47.44	10	-0.06	-0.132001	-0.629541	0.264497	1505	0.0133879	FALSE	0.912565
2390	High	Master Protein	P11182	Lipoamide acyltransferase component of branched-chain alpha-keto acid dehydrogenase complex, mitochondrial OS=Homo sapiens GN=DBT PE=1 SV=3	18.6722	8	10	8	1	482	High	High	0.956	-0.06	1.32041e+06	1.38081e+06	0	21.34	8	-0.06	-0.132001	-0.629541	0.264497	1506	0.0133802	FALSE	0.912565
2393	High	Master Protein	Q14571	Inositol 1,4,5-trisphosphate receptor type 2 OS=Homo sapiens GN=ITPR2 PE=1 SV=2	4.70196	14	16	4	1	2701	High	High	0.956	-0.06	109338	114319	0	36.44	14	-0.06	-0.132001	-0.629541	0.264497	1507	0.0133725	FALSE	0.912565
2394	High	Master Protein	Q969E2	Secretory carrier-associated membrane protein 4 OS=Homo sapiens GN=SCAMP4 PE=1 SV=1	12.2271	3	11	3	1	229	High	High	0.956	-0.06	2.64782e+06	2.76898e+06	0	26.22	3	-0.06	-0.132001	-0.629541	0.264497	1508	0.0133647	FALSE	0.912565
2396	High	Master Protein	O95825	Quinone oxidoreductase-like protein 1 OS=Homo sapiens GN=CRYZL1 PE=1 SV=2	6.87679	2	3	2	1	349	High	High	0.956	-0.06	37101.2	38808.9	0	0	2	-0.06	-0.132001	-0.629541	0.264497	1509	0.013357	FALSE	0.912565
2294	High	Master Protein	O95782	AP-2 complex subunit alpha-1 OS=Homo sapiens GN=AP2A1 PE=1 SV=3	24.6673	21	27	12	1	977	High	High	0.969	-0.05	3.31783e+06	3.42379e+06	7	49.54	21	-0.05	-0.122001	-0.582555	0.280096	1365	0.0144688	FALSE	0.918912
2295	High	Master Protein	Q9UHG3	Prenylcysteine oxidase 1 OS=Homo sapiens GN=PCYOX1 PE=1 SV=3	28.5149	12	45	12	1	505	High	High	0.969	-0.05	6.61297e+06	6.82641e+06	0	127.63	12	-0.05	-0.122001	-0.582555	0.280096	1366	0.0144611	FALSE	0.918912
2297	High	Master Protein	Q8TB61	Adenosine 3'-phospho 5'-phosphosulfate transporter 1 OS=Homo sapiens GN=SLC35B2 PE=1 SV=1	12.963	7	11	7	1	432	High	High	0.969	-0.05	1.1476e+06	1.18398e+06	0	25.83	7	-0.05	-0.122001	-0.582555	0.280096	1367	0.0144534	FALSE	0.918912
2298	High	Master Protein	Q9NUB1	Acetyl-coenzyme A synthetase 2-like, mitochondrial OS=Homo sapiens GN=ACSS1 PE=1 SV=2	7.25689	4	6	4	1	689	High	High	0.969	-0.05	351810	363251	0	12.79	4	-0.05	-0.122001	-0.582555	0.280096	1368	0.0144456	FALSE	0.918912
2300	High	Master Protein	Q8WUD1	Ras-related protein Rab-2B OS=Homo sapiens GN=RAB2B PE=1 SV=1	52.7778	10	18	2	1	216	High	High	0.969	-0.05	191887	198000	0	50.35	10	-0.05	-0.122001	-0.582555	0.280096	1369	0.0144379	FALSE	0.918912
2301	High	Master Protein	Q96CM8	Acyl-CoA synthetase family member 2, mitochondrial OS=Homo sapiens GN=ACSF2 PE=1 SV=2	18.2114	10	12	10	1	615	High	High	0.968	-0.05	1.02176e+06	1.05575e+06	0	26.1	10	-0.05	-0.122001	-0.582555	0.280096	1370	0.0144302	FALSE	0.918912
2302	High	Master Protein	O75323	Protein NipSnap homolog 2 OS=Homo sapiens GN=NIPSNAP2 PE=1 SV=1	17.4825	6	8	6	1	286	High	High	0.968	-0.05	1.0542e+06	1.08901e+06	0	8.89	6	-0.05	-0.122001	-0.582555	0.280096	1371	0.0144225	FALSE	0.918912
2303	High	Master Protein	Q9BZZ5	Apoptosis inhibitor 5 OS=Homo sapiens GN=API5 PE=1 SV=3	12.7863	6	7	6	1	524	High	High	0.968	-0.05	1.50051e+06	1.55018e+06	0	16.06	6	-0.05	-0.122001	-0.582555	0.280096	1372	0.0144148	FALSE	0.918912
2304	High	Master Protein	Q96AG4	Leucine-rich repeat-containing protein 59 OS=Homo sapiens GN=LRRC59 PE=1 SV=1	45.9283	17	40	17	1	307	High	High	0.967	-0.05	8.13086e+06	8.405e+06	0	75.34	17	-0.05	-0.122001	-0.582555	0.280096	1373	0.014407	FALSE	0.918912
2305	High	Master Protein	O75436	Vacuolar protein sorting-associated protein 26A OS=Homo sapiens GN=VPS26A PE=1 SV=2	27.8287	8	10	8	1	327	High	High	0.967	-0.05	1.43727e+06	1.4859e+06	0	16.24	8	-0.05	-0.122001	-0.582555	0.280096	1374	0.0143993	FALSE	0.918912
2306	High	Master Protein	O60493	Sorting nexin-3 OS=Homo sapiens GN=SNX3 PE=1 SV=3	42.5926	8	9	6	1	162	High	High	0.967	-0.05	787423	814498	2	21.68	8	-0.05	-0.122001	-0.582555	0.280096	1375	0.0143916	FALSE	0.918912
2307	High	Master Protein	Q96JJ3	Engulfment and cell motility protein 2 OS=Homo sapiens GN=ELMO2 PE=1 SV=2	11.3889	6	6	6	1	720	High	High	0.967	-0.05	286771	296709	0	17.18	6	-0.05	-0.122001	-0.582555	0.280096	1376	0.0143839	FALSE	0.918912
2308	High	Master Protein	Q9UP95	Solute carrier family 12 member 4 OS=Homo sapiens GN=SLC12A4 PE=1 SV=2	2.94931	4	6	3	1	1085	High	High	0.967	-0.05	615263	636565	1	11.98	4	-0.05	-0.122001	-0.582555	0.280096	1377	0.0143762	FALSE	0.918912
2309	High	Master Protein	P22692	Insulin-like growth factor-binding protein 4 OS=Homo sapiens GN=IGFBP4 PE=1 SV=2	12.4031	3	8	3	1	258	High	High	0.967	-0.05	149606	154658	0	11.01	3	-0.05	-0.122001	-0.582555	0.280096	1378	0.0143684	FALSE	0.918912
2310	High	Master Protein	P58546	Myotrophin OS=Homo sapiens GN=MTPN PE=1 SV=2	22.0339	2	3	2	1	118	High	High	0.967	-0.05	140340	145090	0	9.16	2	-0.05	-0.122001	-0.582555	0.280096	1379	0.0143607	FALSE	0.918912
2311	High	Master Protein	O15258	Protein RER1 OS=Homo sapiens GN=RER1 PE=1 SV=1	10.7143	2	4	2	1	196	High	High	0.967	-0.05	280704	290189	0	7.7	2	-0.05	-0.122001	-0.582555	0.280096	1380	0.014353	FALSE	0.918912
2312	High	Master Protein	Q6P1L8	39S ribosomal protein L14, mitochondrial OS=Homo sapiens GN=MRPL14 PE=1 SV=1	13.1034	2	3	2	1	145	High	High	0.967	-0.05	402055	415949	0	7.44	2	-0.05	-0.122001	-0.582555	0.280096	1381	0.0143453	FALSE	0.918912
2313	High	Master Protein	P62380	TATA box-binding protein-like protein 1 OS=Homo sapiens GN=TBPL1 PE=1 SV=1	13.9785	2	2	2	1	186	High	High	0.967	-0.05	112167	115992	0	4.49	2	-0.05	-0.122001	-0.582555	0.280096	1382	0.0143376	FALSE	0.918912
2314	High	Master Protein	P14314	Glucosidase 2 subunit beta OS=Homo sapiens GN=PRKCSH PE=1 SV=2	34.2803	25	75	25	1	528	High	High	0.966	-0.05	1.81912e+07	1.88319e+07	0	134.48	25	-0.05	-0.122001	-0.582555	0.280096	1383	0.0143298	FALSE	0.918912
2315	High	Master Protein	P51148	Ras-related protein Rab-5C OS=Homo sapiens GN=RAB5C PE=1 SV=2	62.5	10	62	8	1	216	High	High	0.966	-0.05	8.60638e+06	8.90692e+06	2	184.6	10	-0.05	-0.122001	-0.582555	0.280096	1384	0.0143221	FALSE	0.918912
2316	High	Master Protein	O15270	Serine palmitoyltransferase 2 OS=Homo sapiens GN=SPTLC2 PE=1 SV=1	17.4377	8	16	8	1	562	High	High	0.966	-0.05	531091	549946	0	29.53	8	-0.05	-0.122001	-0.582555	0.280096	1385	0.0143144	FALSE	0.918912
2317	High	Master Protein	P05166	Propionyl-CoA carboxylase beta chain, mitochondrial OS=Homo sapiens GN=PCCB PE=1 SV=3	9.6475	4	5	4	1	539	High	High	0.966	-0.05	292239	302475	0	13.82	4	-0.05	-0.122001	-0.582555	0.280096	1386	0.0143067	FALSE	0.918912
2318	High	Master Protein	Q7Z449	Cytochrome P450 2U1 OS=Homo sapiens GN=CYP2U1 PE=1 SV=1	5.88235	3	6	3	1	544	High	High	0.966	-0.05	392389	406062	0	12.84	3	-0.05	-0.122001	-0.582555	0.280096	1387	0.0142989	FALSE	0.918912
2319	High	Master Protein	Q6P4Q7	Metal transporter CNNM4 OS=Homo sapiens GN=CNNM4 PE=1 SV=3	2.70968	2	2	2	1	775	High	High	0.966	-0.05	99019.1	102539	0	0	2	-0.05	-0.122001	-0.582555	0.280096	1388	0.0142912	FALSE	0.918912
2320	High	Master Protein	Q8NBJ4	Golgi membrane protein 1 OS=Homo sapiens GN=GOLM1 PE=1 SV=1	33.4165	13	23	13	1	401	High	High	0.965	-0.05	5.04562e+06	5.22639e+06	0	45.72	13	-0.05	-0.122001	-0.582555	0.280096	1389	0.0142835	FALSE	0.918912
2321	High	Master Protein	Q8IXB1	DnaJ homolog subfamily C member 10 OS=Homo sapiens GN=DNAJC10 PE=1 SV=2	13.2409	11	15	11	1	793	High	High	0.965	-0.05	1.14546e+06	1.18723e+06	0	19.54	11	-0.05	-0.122001	-0.582555	0.280096	1390	0.0142758	FALSE	0.918912
2322	High	Master Protein	Q10713	Mitochondrial-processing peptidase subunit alpha OS=Homo sapiens GN=PMPCA PE=1 SV=2	18.6667	9	15	9	1	525	High	High	0.965	-0.05	1.55267e+06	1.60856e+06	0	33.39	9	-0.05	-0.122001	-0.582555	0.280096	1391	0.0142681	FALSE	0.918912
2323	High	Master Protein	P21283	V-type proton ATPase subunit C 1 OS=Homo sapiens GN=ATP6V1C1 PE=1 SV=4	18.3246	8	13	8	1	382	High	High	0.965	-0.05	953045	987438	0	29.84	8	-0.05	-0.122001	-0.582555	0.280096	1392	0.0142603	FALSE	0.918912
2324	High	Master Protein	Q9NUQ2	1-acyl-sn-glycerol-3-phosphate acyltransferase epsilon OS=Homo sapiens GN=AGPAT5 PE=1 SV=3	18.4066	6	7	6	1	364	High	High	0.965	-0.05	609112	631263	0	13.64	6	-0.05	-0.122001	-0.582555	0.280096	1393	0.0142526	FALSE	0.918912
2325	High	Master Protein	Q8N2H3	Pyridine nucleotide-disulfide oxidoreductase domain-containing protein 2 OS=Homo sapiens GN=PYROXD2 PE=1 SV=2	11.0155	5	8	5	1	581	High	High	0.965	-0.05	620609	642817	0	17.08	5	-0.05	-0.122001	-0.582555	0.280096	1394	0.0142449	FALSE	0.918912
2326	High	Master Protein	O95822	Malonyl-CoA decarboxylase, mitochondrial OS=Homo sapiens GN=MLYCD PE=1 SV=3	6.49087	3	7	3	1	493	High	High	0.965	-0.05	263925	273562	0	7.62	3	-0.05	-0.122001	-0.582555	0.280096	1395	0.0142372	FALSE	0.918912
2327	High	Master Protein	O43760	Synaptogyrin-2 OS=Homo sapiens GN=SYNGR2 PE=1 SV=1	12.5	3	16	3	1	224	High	High	0.965	-0.05	1.86084e+06	1.92889e+06	0	33.62	3	-0.05	-0.122001	-0.582555	0.280096	1396	0.0142295	FALSE	0.918912
2328	High	Master Protein	Q9P2X0	Dolichol-phosphate mannosyltransferase subunit 3 OS=Homo sapiens GN=DPM3 PE=1 SV=2	23.913	2	9	2	1	92	High	High	0.965	-0.05	698043	723437	0	25.47	2	-0.05	-0.122001	-0.582555	0.280096	1397	0.0142217	FALSE	0.918912
2329	High	Master Protein	P09110	3-ketoacyl-CoA thiolase, peroxisomal OS=Homo sapiens GN=ACAA1 PE=1 SV=2	35.3774	12	26	12	1	424	High	High	0.964	-0.05	1.47463e+06	1.52994e+06	0	74.07	12	-0.05	-0.122001	-0.582555	0.280096	1398	0.014214	FALSE	0.918912
2330	High	Master Protein	Q9BQA9	Uncharacterized protein C17orf62 OS=Homo sapiens GN=C17orf62 PE=1 SV=1	17.1123	4	7	4	1	187	High	High	0.964	-0.05	538992	559353	0	21.33	4	-0.05	-0.122001	-0.582555	0.280096	1399	0.0142063	FALSE	0.918912
2331	High	Master Protein	Q9Y2Q5	Ragulator complex protein LAMTOR2 OS=Homo sapiens GN=LAMTOR2 PE=1 SV=1	31.2	3	4	3	1	125	High	High	0.964	-0.05	797512	827344	0	11.3	3	-0.05	-0.122001	-0.582555	0.280096	1400	0.0141986	FALSE	0.918912
2332	High	Master Protein	P17050	Alpha-N-acetylgalactosaminidase OS=Homo sapiens GN=NAGA PE=1 SV=2	9.73236	3	3	3	1	411	High	High	0.964	-0.05	262385	272135	0	5.81	3	-0.05	-0.122001	-0.582555	0.280096	1401	0.0141909	FALSE	0.918912
2333	High	Master Protein	Q9BYC9	39S ribosomal protein L20, mitochondrial OS=Homo sapiens GN=MRPL20 PE=1 SV=1	16.1074	3	4	3	1	149	High	High	0.964	-0.05	56958.7	59058.9	0	0	3	-0.05	-0.122001	-0.582555	0.280096	1402	0.0141831	FALSE	0.918912
2334	High	Master Protein	P06865	Beta-hexosaminidase subunit alpha OS=Homo sapiens GN=HEXA PE=1 SV=2	20.2268	11	16	10	1	529	High	High	0.963	-0.05	2.34603e+06	2.43634e+06	1	28.42	11	-0.05	-0.122001	-0.582555	0.280096	1403	0.0141754	FALSE	0.918912
2335	High	Master Protein	Q99747	Gamma-soluble NSF attachment protein OS=Homo sapiens GN=NAPG PE=1 SV=1	17.9487	6	6	6	1	312	High	High	0.963	-0.05	679279	705534	0	10.53	6	-0.05	-0.122001	-0.582555	0.280096	1404	0.0141677	FALSE	0.918912
2336	High	Master Protein	Q13232	Nucleoside diphosphate kinase 3 OS=Homo sapiens GN=NME3 PE=1 SV=2	22.4852	4	6	4	1	169	High	High	0.963	-0.05	856119	888713	0	11.15	4	-0.05	-0.122001	-0.582555	0.280096	1405	0.01416	FALSE	0.918912
2337	High	Master Protein	Q9Y3D7	Mitochondrial import inner membrane translocase subunit TIM16 OS=Homo sapiens GN=PAM16 PE=1 SV=2	18.4	3	9	2	1	125	High	High	0.963	-0.05	623982	647865	1	8.19	3	-0.05	-0.122001	-0.582555	0.280096	1406	0.0141523	FALSE	0.918912
2338	High	Master Protein	Q6ZT21	Transmembrane protein with metallophosphoesterase domain OS=Homo sapiens GN=TMPPE PE=2 SV=2	3.75276	2	2	2	1	453	High	High	0.963	-0.05	602607	625491	0	3.83	2	-0.05	-0.122001	-0.582555	0.280096	1407	0.0141445	FALSE	0.918912
2339	High	Master Protein	P55210	Caspase-7 OS=Homo sapiens GN=CASP7 PE=1 SV=1	6.27063	2	2	2	1	303	High	High	0.963	-0.05	151858	157622	0	2.08	2	-0.05	-0.122001	-0.582555	0.280096	1408	0.0141368	FALSE	0.918912
2240	High	Master Protein	Q15738	Sterol-4-alpha-carboxylate 3-dehydrogenase, decarboxylating OS=Homo sapiens GN=NSDHL PE=1 SV=2	40.4826	13	25	13	1	373	High	High	0.976	-0.04	3.99799e+06	4.0979e+06	0	75.7	13	-0.04	-0.112001	-0.53557	0.296128	1263	0.0152563	FALSE	0.925304
2242	High	Master Protein	Q96FW1	Ubiquitin thioesterase OTUB1 OS=Homo sapiens GN=OTUB1 PE=1 SV=2	27.3063	6	13	6	1	271	High	High	0.976	-0.04	523053	535911	0	31.76	6	-0.04	-0.112001	-0.53557	0.296128	1264	0.0152486	FALSE	0.925304
2245	High	Master Protein	Q9P265	Disco-interacting protein 2 homolog B OS=Homo sapiens GN=DIP2B PE=1 SV=3	1.33249	2	2	2	1	1576	High	High	0.976	-0.04	173680	178016	0	2.1	2	-0.04	-0.112001	-0.53557	0.296128	1265	0.0152409	FALSE	0.925304
2247	High	Master Protein	Q6YN16	Hydroxysteroid dehydrogenase-like protein 2 OS=Homo sapiens GN=HSDL2 PE=1 SV=1	45.933	17	28	17	1	418	High	High	0.975	-0.04	5.06443e+06	5194740	0	73.41	17	-0.04	-0.112001	-0.53557	0.296128	1266	0.0152332	FALSE	0.925304
2248	High	Master Protein	Q15019	Septin-2 OS=Homo sapiens GN=SEPT2 PE=1 SV=1	32.687	10	23	10	1	361	High	High	0.975	-0.04	3.84957e+06	3.94731e+06	0	53.7	10	-0.04	-0.112001	-0.53557	0.296128	1267	0.0152254	FALSE	0.925304
2249	High	Master Protein	Q96RQ3	Methylcrotonoyl-CoA carboxylase subunit alpha, mitochondrial OS=Homo sapiens GN=MCCC1 PE=1 SV=3	13.931	7	10	7	1	725	High	High	0.975	-0.04	550069	564201	0	17.2	7	-0.04	-0.112001	-0.53557	0.296128	1268	0.0152177	FALSE	0.925304
2250	High	Master Protein	Q96M27	Protein PRRC1 OS=Homo sapiens GN=PRRC1 PE=1 SV=1	12.3596	4	9	4	1	445	High	High	0.975	-0.04	787745	807573	0	27.83	4	-0.04	-0.112001	-0.53557	0.296128	1269	0.01521	FALSE	0.925304
2251	High	Master Protein	Q96AA3	Protein RFT1 homolog OS=Homo sapiens GN=RFT1 PE=1 SV=1	5.91497	3	5	3	1	541	High	High	0.975	-0.04	580539	595228	0	11.74	3	-0.04	-0.112001	-0.53557	0.296128	1270	0.0152023	FALSE	0.925304
2252	High	Master Protein	Q8NFQ8	Torsin-1A-interacting protein 2 OS=Homo sapiens GN=TOR1AIP2 PE=1 SV=1	10.4255	4	7	3	1	470	High	High	0.975	-0.04	435222	446277	0	15.66	4	-0.04	-0.112001	-0.53557	0.296128	1271	0.0151946	FALSE	0.925304
2253	High	Master Protein	Q86XP3	ATP-dependent RNA helicase DDX42 OS=Homo sapiens GN=DDX42 PE=1 SV=1	2.45203	2	2	2	1	938	High	High	0.975	-0.04	57292.6	58774.9	0	2.02	2	-0.04	-0.112001	-0.53557	0.296128	1272	0.0151868	FALSE	0.925304
2254	High	Master Protein	O75828	Carbonyl reductase [NADPH] 3 OS=Homo sapiens GN=CBR3 PE=1 SV=3	19.1336	4	8	2	1	277	High	High	0.975	-0.04	35816.9	36733.2	0	30.26	4	-0.04	-0.112001	-0.53557	0.296128	1273	0.0151791	FALSE	0.925304
2255	High	Master Protein	Q13813	Spectrin alpha chain, non-erythrocytic 1 OS=Homo sapiens GN=SPTAN1 PE=1 SV=3	33.6974	84	126	84	1	2472	High	High	0.974	-0.04	1.04335e+07	1.07094e+07	0	247.3	84	-0.04	-0.112001	-0.53557	0.296128	1274	0.0151714	FALSE	0.925304
2256	High	Master Protein	O14936	Peripheral plasma membrane protein CASK OS=Homo sapiens GN=CASK PE=1 SV=3	9.71922	9	13	9	1	926	High	High	0.974	-0.04	517151	531019	0	30.81	9	-0.04	-0.112001	-0.53557	0.296128	1275	0.0151637	FALSE	0.925304
2257	High	Master Protein	P16219	Short-chain specific acyl-CoA dehydrogenase, mitochondrial OS=Homo sapiens GN=ACADS PE=1 SV=1	17.7184	6	8	6	1	412	High	High	0.974	-0.04	1.13133e+06	1.16145e+06	0	19.49	6	-0.04	-0.112001	-0.53557	0.296128	1276	0.015156	FALSE	0.925304
2258	High	Master Protein	P48739	Phosphatidylinositol transfer protein beta isoform OS=Homo sapiens GN=PITPNB PE=1 SV=2	24.3542	7	12	6	1	271	High	High	0.974	-0.04	548089	562699	1	9.48	7	-0.04	-0.112001	-0.53557	0.296128	1277	0.0151482	FALSE	0.925304
2259	High	Master Protein	Q96BQ5	Coiled-coil domain-containing protein 127 OS=Homo sapiens GN=CCDC127 PE=1 SV=1	20.7692	6	8	5	1	260	High	High	0.974	-0.04	850819	873345	1	15.51	6	-0.04	-0.112001	-0.53557	0.296128	1278	0.0151405	FALSE	0.925304
2260	High	Master Protein	P35052	Glypican-1 OS=Homo sapiens GN=GPC1 PE=1 SV=2	3.76344	2	2	2	1	558	High	High	0.974	-0.04	84972.3	87267.1	0	4.65	2	-0.04	-0.112001	-0.53557	0.296128	1279	0.0151328	FALSE	0.925304
2261	High	Master Protein	Q96F86	Enhancer of mRNA-decapping protein 3 OS=Homo sapiens GN=EDC3 PE=1 SV=1	6.49606	2	2	2	1	508	High	High	0.974	-0.04	54040.7	55463.4	0	2.88	2	-0.04	-0.112001	-0.53557	0.296128	1280	0.0151251	FALSE	0.925304
2262	High	Master Protein	Q99643	Succinate dehydrogenase cytochrome b560 subunit, mitochondrial OS=Homo sapiens GN=SDHC PE=1 SV=1	12.426	2	3	2	1	169	High	High	0.974	-0.04	2.7355e+06	2.80802e+06	0	10.13	2	-0.04	-0.112001	-0.53557	0.296128	1281	0.0151174	FALSE	0.925304
2263	High	Master Protein	Q96EN8	Molybdenum cofactor sulfurase OS=Homo sapiens GN=MOCOS PE=1 SV=2	3.37838	2	2	2	1	888	High	High	0.974	-0.04	57803	59362.4	0	3.58	2	-0.04	-0.112001	-0.53557	0.296128	1282	0.0151096	FALSE	0.925304
2264	High	Master Protein	Q13501	Sequestosome-1 OS=Homo sapiens GN=SQSTM1 PE=1 SV=1	28.8636	7	16	7	1	440	High	High	0.973	-0.04	705091	724830	0	49.09	7	-0.04	-0.112001	-0.53557	0.296128	1283	0.0151019	FALSE	0.925304
2265	High	Master Protein	Q96CU9	FAD-dependent oxidoreductase domain-containing protein 1 OS=Homo sapiens GN=FOXRED1 PE=1 SV=2	12.963	6	11	6	1	486	High	High	0.973	-0.04	705166	725040	0	18.51	6	-0.04	-0.112001	-0.53557	0.296128	1284	0.0150942	FALSE	0.925304
2266	High	Master Protein	P54920	Alpha-soluble NSF attachment protein OS=Homo sapiens GN=NAPA PE=1 SV=3	24.0678	6	8	6	1	295	High	High	0.973	-0.04	511963	526059	0	16.74	6	-0.04	-0.112001	-0.53557	0.296128	1285	0.0150865	FALSE	0.925304
2267	High	Master Protein	Q9BQ95	Evolutionarily conserved signaling intermediate in Toll pathway, mitochondrial OS=Homo sapiens GN=ECSIT PE=1 SV=1	14.6172	5	11	5	1	431	High	High	0.973	-0.04	312134	320784	0	26.72	5	-0.04	-0.112001	-0.53557	0.296128	1286	0.0150788	FALSE	0.925304
2268	High	Master Protein	P13987	CD59 glycoprotein OS=Homo sapiens GN=CD59 PE=1 SV=1	27.3438	5	18	5	1	128	High	High	0.973	-0.04	3.55805e+06	3.65749e+06	0	52.04	5	-0.04	-0.112001	-0.53557	0.296128	1287	0.015071	FALSE	0.925304
2269	High	Master Protein	Q7Z7H8	39S ribosomal protein L10, mitochondrial OS=Homo sapiens GN=MRPL10 PE=1 SV=3	16.8582	3	5	3	1	261	High	High	0.973	-0.04	440450	452762	0	16.42	3	-0.04	-0.112001	-0.53557	0.296128	1288	0.0150633	FALSE	0.925304
2270	High	Master Protein	Q96BI3	Gamma-secretase subunit APH-1A OS=Homo sapiens GN=APH1A PE=1 SV=1	5.28302	2	4	2	1	265	High	High	0.973	-0.04	112311	115412	0	9.38	2	-0.04	-0.112001	-0.53557	0.296128	1289	0.0150556	FALSE	0.925304
2271	High	Master Protein	P46940	Ras GTPase-activating-like protein IQGAP1 OS=Homo sapiens GN=IQGAP1 PE=1 SV=1	39.5293	58	144	56	1	1657	High	High	0.972	-0.04	1.66996e+07	1.71884e+07	2	370.61	58	-0.04	-0.112001	-0.53557	0.296128	1290	0.0150479	FALSE	0.925304
2272	High	Master Protein	Q13620	Cullin-4B OS=Homo sapiens GN=CUL4B PE=1 SV=4	15.8817	16	18	16	1	913	High	High	0.972	-0.04	1.64771e+06	1.69444e+06	0	30.22	16	-0.04	-0.112001	-0.53557	0.296128	1291	0.0150401	FALSE	0.925304
2273	High	Master Protein	Q9UBM7	7-dehydrocholesterol reductase OS=Homo sapiens GN=DHCR7 PE=1 SV=1	17.6842	8	14	8	1	475	High	High	0.972	-0.04	4.72855e+06	4.86601e+06	0	26.16	8	-0.04	-0.112001	-0.53557	0.296128	1292	0.0150324	FALSE	0.925304
2274	High	Master Protein	Q7LBR1	Charged multivesicular body protein 1b OS=Homo sapiens GN=CHMP1B PE=1 SV=1	18.593	5	6	5	1	199	High	High	0.972	-0.04	1.2072e+06	1.2423e+06	0	13.12	5	-0.04	-0.112001	-0.53557	0.296128	1293	0.0150247	FALSE	0.925304
2275	High	Master Protein	O14828	Secretory carrier-associated membrane protein 3 OS=Homo sapiens GN=SCAMP3 PE=1 SV=3	15.562	5	11	5	1	347	High	High	0.972	-0.04	1.5651e+06	1.61099e+06	0	41.47	5	-0.04	-0.112001	-0.53557	0.296128	1294	0.015017	FALSE	0.925304
2276	High	Master Protein	Q9H3P7	Golgi resident protein GCP60 OS=Homo sapiens GN=ACBD3 PE=1 SV=4	11.7424	4	6	4	1	528	High	High	0.972	-0.04	195682	201365	0	12.1	4	-0.04	-0.112001	-0.53557	0.296128	1295	0.0150093	FALSE	0.925304
2277	High	Master Protein	Q9BWH2	FUN14 domain-containing protein 2 OS=Homo sapiens GN=FUNDC2 PE=1 SV=2	17.4603	4	7	4	1	189	High	High	0.972	-0.04	1.02671e+06	1.05672e+06	0	12.63	4	-0.04	-0.112001	-0.53557	0.296128	1296	0.0150015	FALSE	0.925304
2278	High	Master Protein	Q9Y3A6	Transmembrane emp24 domain-containing protein 5 OS=Homo sapiens GN=TMED5 PE=1 SV=1	13.9738	3	5	3	1	229	High	High	0.972	-0.04	339174	349015	0	7.88	3	-0.04	-0.112001	-0.53557	0.296128	1297	0.0149938	FALSE	0.925304
2279	High	Master Protein	O43920	NADH dehydrogenase [ubiquinone] iron-sulfur protein 5 OS=Homo sapiens GN=NDUFS5 PE=1 SV=3	22.6415	2	3	2	1	106	High	High	0.972	-0.04	282214	290255	0	6.72	2	-0.04	-0.112001	-0.53557	0.296128	1298	0.0149861	FALSE	0.925304
2280	High	Master Protein	Q9NZ32	Actin-related protein 10 OS=Homo sapiens GN=ACTR10 PE=1 SV=1	7.43405	2	3	2	1	417	High	High	0.972	-0.04	91327.1	93922.7	0	9.23	2	-0.04	-0.112001	-0.53557	0.296128	1299	0.0149784	FALSE	0.925304
2281	High	Master Protein	Q9Y490	Talin-1 OS=Homo sapiens GN=TLN1 PE=1 SV=3	37.5836	86	147	86	1	2541	High	High	0.971	-0.04	1.7926e+07	1.84562e+07	0	372.76	86	-0.04	-0.112001	-0.53557	0.296128	1300	0.0149707	FALSE	0.925304
2282	High	Master Protein	P22307	Non-specific lipid-transfer protein OS=Homo sapiens GN=SCP2 PE=1 SV=2	32.1755	20	42	20	1	547	High	High	0.971	-0.04	9.7315e+06	1.00229e+07	0	112.47	20	-0.04	-0.112001	-0.53557	0.296128	1301	0.0149629	FALSE	0.925304
2283	High	Master Protein	O75844	CAAX prenyl protease 1 homolog OS=Homo sapiens GN=ZMPSTE24 PE=1 SV=2	30.3158	14	38	14	1	475	High	High	0.971	-0.04	5.13775e+06	5.29093e+06	0	100.78	14	-0.04	-0.112001	-0.53557	0.296128	1302	0.0149552	FALSE	0.925304
2284	High	Master Protein	P09669	Cytochrome c oxidase subunit 6C OS=Homo sapiens GN=COX6C PE=1 SV=2	50.6667	6	11	6	1	75	High	High	0.971	-0.04	4.99802e+06	5.1492e+06	0	15.56	6	-0.04	-0.112001	-0.53557	0.296128	1303	0.0149475	FALSE	0.925304
2285	High	Master Protein	Q12996	Cleavage stimulation factor subunit 3 OS=Homo sapiens GN=CSTF3 PE=1 SV=1	6.55509	4	6	4	1	717	High	High	0.971	-0.04	232382	239366	0	13.44	4	-0.04	-0.112001	-0.53557	0.296128	1304	0.0149398	FALSE	0.925304
2286	High	Master Protein	Q9Y333	U6 snRNA-associated Sm-like protein LSm2 OS=Homo sapiens GN=LSM2 PE=1 SV=1	27.3684	2	3	2	1	95	High	High	0.971	-0.04	460756	474742	0	4.56	2	-0.04	-0.112001	-0.53557	0.296128	1305	0.0149321	FALSE	0.925304
2287	High	Master Protein	Q96E11	Ribosome-recycling factor, mitochondrial OS=Homo sapiens GN=MRRF PE=1 SV=1	9.54198	2	3	2	1	262	High	High	0.971	-0.04	296854	305727	0	5.29	2	-0.04	-0.112001	-0.53557	0.296128	1306	0.0149243	FALSE	0.925304
2288	High	Master Protein	P42356	Phosphatidylinositol 4-kinase alpha OS=Homo sapiens GN=PI4KA PE=1 SV=4	1.52236	2	2	2	1	2102	High	High	0.971	-0.04	21015.7	21646.9	0	5.93	2	-0.04	-0.112001	-0.53557	0.296128	1307	0.0149166	FALSE	0.925304
2289	High	Master Protein	Q6UWP7	Lysocardiolipin acyltransferase 1 OS=Homo sapiens GN=LCLAT1 PE=1 SV=1	4.83092	2	2	2	1	414	High	High	0.971	-0.04	195451	201307	0	3.78	2	-0.04	-0.112001	-0.53557	0.296128	1308	0.0149089	FALSE	0.925304
2290	High	Master Protein	P35580	Myosin-10 OS=Homo sapiens GN=MYH10 PE=1 SV=3	32.0344	69	146	45	1	1976	High	High	0.97	-0.04	4.70856e+06	4.85363e+06	1	333.53	69	-0.04	-0.112001	-0.53557	0.296128	1309	0.0149012	FALSE	0.925304
2291	High	Master Protein	P55899	IgG receptor FcRn large subunit p51 OS=Homo sapiens GN=FCGRT PE=1 SV=1	18.0822	5	6	5	1	365	High	High	0.97	-0.04	870082	897003	0	12.48	5	-0.04	-0.112001	-0.53557	0.296128	1310	0.0148935	FALSE	0.925304
2292	High	Master Protein	P13497	Bone morphogenetic protein 1 OS=Homo sapiens GN=BMP1 PE=1 SV=2	4.25963	4	5	4	1	986	High	High	0.97	-0.04	426767	439906	0	6.78	4	-0.04	-0.112001	-0.53557	0.296128	1311	0.0148857	FALSE	0.925304
2293	High	Master Protein	P12235	ADP/ATP translocase 1 OS=Homo sapiens GN=SLC25A4 PE=1 SV=4	51.6779	16	100	3	1	298	High	High	0.97	-0.04	3.17123e+06	3.27026e+06	0	292	16	-0.04	-0.112001	-0.53557	0.296128	1312	0.014878	FALSE	0.925304
2296	High	Master Protein	Q15046	Lysine--tRNA ligase OS=Homo sapiens GN=KARS PE=1 SV=3	15.4104	11	17	11	1	597	High	High	0.969	-0.04	1.3446e+06	1.3871e+06	0	25.6	11	-0.04	-0.112001	-0.53557	0.296128	1313	0.0148703	FALSE	0.925304
2299	High	Master Protein	Q8N983	39S ribosomal protein L43, mitochondrial OS=Homo sapiens GN=MRPL43 PE=1 SV=1	13.4884	3	4	3	1	215	High	High	0.969	-0.04	350786	361861	0	7.99	3	-0.04	-0.112001	-0.53557	0.296128	1314	0.0148626	FALSE	0.925304
2196	High	Master Protein	P35625	Metalloproteinase inhibitor 3 OS=Homo sapiens GN=TIMP3 PE=1 SV=2	8.05687	2	2	2	1	211	High	High	0.983	-0.03	698409	710625	0	5.06	2	-0.03	-0.102001	-0.488584	0.312568	1163	0.0160284	FALSE	0.93174
2197	High	Master Protein	Q96CW1	AP-2 complex subunit mu OS=Homo sapiens GN=AP2M1 PE=1 SV=2	21.6092	8	10	8	1	435	High	High	0.982	-0.03	885728	902252	0	25.99	8	-0.03	-0.102001	-0.488584	0.312568	1164	0.0160207	FALSE	0.93174
2198	High	Master Protein	Q9Y2D4	Exocyst complex component 6B OS=Homo sapiens GN=EXOC6B PE=1 SV=3	10.8508	7	8	7	1	811	High	High	0.982	-0.03	255831	260595	0	15.69	7	-0.03	-0.102001	-0.488584	0.312568	1165	0.016013	FALSE	0.93174
2199	High	Master Protein	Q14847	LIM and SH3 domain protein 1 OS=Homo sapiens GN=LASP1 PE=1 SV=2	25.2874	6	12	6	1	261	High	High	0.982	-0.03	2.30434e+06	2.34579e+06	0	28.54	6	-0.03	-0.102001	-0.488584	0.312568	1166	0.0160053	FALSE	0.93174
2200	High	Master Protein	Q96HE7	ERO1-like protein alpha OS=Homo sapiens GN=ERO1A PE=1 SV=2	42.3077	17	50	17	1	468	High	High	0.981	-0.03	5.43926e+06	5.54559e+06	0	140.67	17	-0.03	-0.102001	-0.488584	0.312568	1167	0.0159975	FALSE	0.93174
2201	High	Master Protein	Q7L576	Cytoplasmic FMR1-interacting protein 1 OS=Homo sapiens GN=CYFIP1 PE=1 SV=1	12.929	15	22	15	1	1253	High	High	0.981	-0.03	1.55717e+06	1.58681e+06	0	52.82	15	-0.03	-0.102001	-0.488584	0.312568	1168	0.0159898	FALSE	0.93174
2202	High	Master Protein	O15144	Actin-related protein 2/3 complex subunit 2 OS=Homo sapiens GN=ARPC2 PE=1 SV=1	30.3333	11	18	11	1	300	High	High	0.981	-0.03	3.56148e+06	3.63075e+06	0	42.35	11	-0.03	-0.102001	-0.488584	0.312568	1169	0.0159821	FALSE	0.93174
2203	High	Master Protein	Q9BS26	Endoplasmic reticulum resident protein 44 OS=Homo sapiens GN=ERP44 PE=1 SV=1	33.9901	12	30	11	1	406	High	High	0.981	-0.03	5.70541e+06	5.8187e+06	1	77.52	12	-0.03	-0.102001	-0.488584	0.312568	1170	0.0159744	FALSE	0.93174
2204	High	Master Protein	P27348	14-3-3 protein theta OS=Homo sapiens GN=YWHAQ PE=1 SV=1	51.4286	14	34	9	1	245	High	High	0.981	-0.03	3.44862e+06	3.51365e+06	1	80.46	14	-0.03	-0.102001	-0.488584	0.312568	1171	0.0159666	FALSE	0.93174
2205	High	Master Protein	O75964	ATP synthase subunit g, mitochondrial OS=Homo sapiens GN=ATP5L PE=1 SV=3	31.068	4	17	4	1	103	High	High	0.981	-0.03	2.46264e+06	2.51145e+06	0	45.01	4	-0.03	-0.102001	-0.488584	0.312568	1172	0.0159589	FALSE	0.93174
2206	High	Master Protein	Q7Z4G4	tRNA (guanine(10)-N2)-methyltransferase homolog OS=Homo sapiens GN=TRMT11 PE=1 SV=1	4.31965	3	5	3	1	463	High	High	0.981	-0.03	205492	209540	0	7.71	3	-0.03	-0.102001	-0.488584	0.312568	1173	0.0159512	FALSE	0.93174
2207	High	Master Protein	Q86W92	Liprin-beta-1 OS=Homo sapiens GN=PPFIBP1 PE=1 SV=2	2.07715	2	2	2	1	1011	High	High	0.981	-0.03	119576	121833	0	2.22	2	-0.03	-0.102001	-0.488584	0.312568	1174	0.0159435	FALSE	0.93174
2208	High	Master Protein	P09914	Interferon-induced protein with tetratricopeptide repeats 1 OS=Homo sapiens GN=IFIT1 PE=1 SV=2	31.1715	13	26	11	1	478	High	High	0.98	-0.03	2.70638e+06	2.76136e+06	2	54.66	13	-0.03	-0.102001	-0.488584	0.312568	1175	0.0159358	FALSE	0.93174
2209	High	Master Protein	Q9BYC5	Alpha-(1,6)-fucosyltransferase OS=Homo sapiens GN=FUT8 PE=1 SV=2	16	9	21	9	1	575	High	High	0.98	-0.03	2.14334e+06	2.18718e+06	0	45.46	9	-0.03	-0.102001	-0.488584	0.312568	1176	0.015928	FALSE	0.93174
2210	High	Master Protein	Q9Y6M5	Zinc transporter 1 OS=Homo sapiens GN=SLC30A1 PE=1 SV=3	19.1321	7	8	7	1	507	High	High	0.98	-0.03	409212	417559	0	18.15	7	-0.03	-0.102001	-0.488584	0.312568	1177	0.0159203	FALSE	0.93174
2211	High	Master Protein	Q9UI12	V-type proton ATPase subunit H OS=Homo sapiens GN=ATP6V1H PE=1 SV=1	17.5983	6	6	6	1	483	High	High	0.98	-0.03	1.1725e+06	1.19638e+06	0	16.98	6	-0.03	-0.102001	-0.488584	0.312568	1178	0.0159126	FALSE	0.93174
2212	High	Master Protein	Q15642	Cdc42-interacting protein 4 OS=Homo sapiens GN=TRIP10 PE=1 SV=3	8.31947	5	6	5	1	601	High	High	0.98	-0.03	496947	507056	0	13.82	5	-0.03	-0.102001	-0.488584	0.312568	1179	0.0159049	FALSE	0.93174
2213	High	Master Protein	P00749	Urokinase-type plasminogen activator OS=Homo sapiens GN=PLAU PE=1 SV=2	8.81671	5	6	5	1	431	High	High	0.98	-0.03	753480	768648	0	15.56	5	-0.03	-0.102001	-0.488584	0.312568	1180	0.0158972	FALSE	0.93174
2214	High	Master Protein	Q6NUM9	All-trans-retinol 13,14-reductase OS=Homo sapiens GN=RETSAT PE=1 SV=2	7.21311	5	7	5	1	610	High	High	0.98	-0.03	453171	462229	0	8	5	-0.03	-0.102001	-0.488584	0.312568	1181	0.0158894	FALSE	0.93174
2215	High	Master Protein	Q9UBV8	Peflin OS=Homo sapiens GN=PEF1 PE=1 SV=1	8.4507	3	4	3	1	284	High	High	0.98	-0.03	346879	353883	0	4.23	3	-0.03	-0.102001	-0.488584	0.312568	1182	0.0158817	FALSE	0.93174
2216	High	Master Protein	Q9HBL7	Plasminogen receptor (KT) OS=Homo sapiens GN=PLGRKT PE=1 SV=1	15.6463	3	5	3	1	147	High	High	0.98	-0.03	342668	349839	0	8.11	3	-0.03	-0.102001	-0.488584	0.312568	1183	0.015874	FALSE	0.93174
2217	High	Master Protein	Q9NV96	Cell cycle control protein 50A OS=Homo sapiens GN=TMEM30A PE=1 SV=1	5.26316	2	3	2	1	361	High	High	0.98	-0.03	979283	999317	0	4.32	2	-0.03	-0.102001	-0.488584	0.312568	1184	0.0158663	FALSE	0.93174
2218	High	Master Protein	Q5T0F9	Coiled-coil and C2 domain-containing protein 1B OS=Homo sapiens GN=CC2D1B PE=1 SV=1	2.44755	2	3	2	1	858	High	High	0.98	-0.03	113667	116041	0	4.18	2	-0.03	-0.102001	-0.488584	0.312568	1185	0.0158586	FALSE	0.93174
2219	High	Master Protein	Q99985	Semaphorin-3C OS=Homo sapiens GN=SEMA3C PE=2 SV=2	3.06258	2	2	2	1	751	High	High	0.98	-0.03	38139	38905.9	0	0	2	-0.03	-0.102001	-0.488584	0.312568	1186	0.0158508	FALSE	0.93174
2220	High	Master Protein	O14832	Phytanoyl-CoA dioxygenase, peroxisomal OS=Homo sapiens GN=PHYH PE=1 SV=1	5.6213	2	2	2	1	338	High	High	0.98	-0.03	49519.1	50548.7	0	2.74	2	-0.03	-0.102001	-0.488584	0.312568	1187	0.0158431	FALSE	0.93174
2221	High	Master Protein	P04844	Dolichyl-diphosphooligosaccharide--protein glycosyltransferase subunit 2 OS=Homo sapiens GN=RPN2 PE=1 SV=3	32.9635	20	61	20	1	631	High	High	0.979	-0.03	1.1957e+07	1.22174e+07	0	184.53	20	-0.03	-0.102001	-0.488584	0.312568	1188	0.0158354	FALSE	0.93174
2222	High	Master Protein	P20073	Annexin A7 OS=Homo sapiens GN=ANXA7 PE=1 SV=3	28.0738	13	23	12	1	488	High	High	0.979	-0.03	1.81457e+06	1.85283e+06	0	37.89	13	-0.03	-0.102001	-0.488584	0.312568	1189	0.0158277	FALSE	0.93174
2223	High	Master Protein	Q15181	Inorganic pyrophosphatase OS=Homo sapiens GN=PPA1 PE=1 SV=2	38.4083	9	21	9	1	289	High	High	0.979	-0.03	3.57002e+06	3.64699e+06	0	51.5	9	-0.03	-0.102001	-0.488584	0.312568	1190	0.01582	FALSE	0.93174
2224	High	Master Protein	Q7L5N7	Lysophosphatidylcholine acyltransferase 2 OS=Homo sapiens GN=LPCAT2 PE=1 SV=1	14.8897	8	11	8	1	544	High	High	0.979	-0.03	1.45666e+06	1.48765e+06	0	20.84	8	-0.03	-0.102001	-0.488584	0.312568	1191	0.0158122	FALSE	0.93174
2225	High	Master Protein	P09651	Heterogeneous nuclear ribonucleoprotein A1 OS=Homo sapiens GN=HNRNPA1 PE=1 SV=5	28.7634	11	32	7	1	372	High	High	0.979	-0.03	1.31679e+06	1.34495e+06	0	80.74	11	-0.03	-0.102001	-0.488584	0.312568	1192	0.0158045	FALSE	0.93174
2226	High	Master Protein	O15382	Branched-chain-amino-acid aminotransferase, mitochondrial OS=Homo sapiens GN=BCAT2 PE=1 SV=2	20.1531	7	15	7	1	392	High	High	0.979	-0.03	2.24335e+06	2.29224e+06	0	43.56	7	-0.03	-0.102001	-0.488584	0.312568	1193	0.0157968	FALSE	0.93174
2227	High	Master Protein	Q6PCB7	Long-chain fatty acid transport protein 1 OS=Homo sapiens GN=SLC27A1 PE=2 SV=1	10.3715	6	8	4	1	646	High	High	0.979	-0.03	814310	831638	0	15.91	6	-0.03	-0.102001	-0.488584	0.312568	1194	0.0157891	FALSE	0.93174
2228	High	Master Protein	Q9UHY1	Nuclear receptor-binding protein OS=Homo sapiens GN=NRBP1 PE=1 SV=1	5.04673	2	2	2	1	535	High	High	0.979	-0.03	55101.9	56255.9	0	4.17	2	-0.03	-0.102001	-0.488584	0.312568	1195	0.0157813	FALSE	0.93174
2229	High	Master Protein	Q5JPE7	Nodal modulator 2 OS=Homo sapiens GN=NOMO2 PE=1 SV=1	23.5991	23	43	2	1	1267	High	High	0.979	-0.03	3.9888e+06	4.07431e+06	20	109.99	23	-0.03	-0.102001	-0.488584	0.312568	1196	0.0157736	FALSE	0.93174
2230	High	Master Protein	Q9BTV4	Transmembrane protein 43 OS=Homo sapiens GN=TMEM43 PE=1 SV=1	17.75	9	22	9	1	400	High	High	0.978	-0.03	4.70047e+06	4.80558e+06	0	54.17	9	-0.03	-0.102001	-0.488584	0.312568	1197	0.0157659	FALSE	0.93174
2231	High	Master Protein	P82933	28S ribosomal protein S9, mitochondrial OS=Homo sapiens GN=MRPS9 PE=1 SV=2	19.4444	8	10	8	1	396	High	High	0.978	-0.03	1.48562e+06	1.51918e+06	0	20.14	8	-0.03	-0.102001	-0.488584	0.312568	1198	0.0157582	FALSE	0.93174
2232	High	Master Protein	Q16543	Hsp90 co-chaperone Cdc37 OS=Homo sapiens GN=CDC37 PE=1 SV=1	23.0159	7	15	7	1	378	High	High	0.978	-0.03	947861	969165	0	22.97	7	-0.03	-0.102001	-0.488584	0.312568	1199	0.0157505	FALSE	0.93174
2233	High	Master Protein	P36543	V-type proton ATPase subunit E 1 OS=Homo sapiens GN=ATP6V1E1 PE=1 SV=1	24.3363	7	11	7	1	226	High	High	0.978	-0.03	2.32089e+06	2.37347e+06	0	27.26	7	-0.03	-0.102001	-0.488584	0.312568	1200	0.0157427	FALSE	0.93174
2234	High	Master Protein	Q6UW02	Cytochrome P450 20A1 OS=Homo sapiens GN=CYP20A1 PE=1 SV=1	10.8225	5	6	5	1	462	High	High	0.978	-0.03	1.14596e+06	1.17167e+06	0	6.85	5	-0.03	-0.102001	-0.488584	0.312568	1201	0.015735	FALSE	0.93174
2235	High	Master Protein	Q14697	Neutral alpha-glucosidase AB OS=Homo sapiens GN=GANAB PE=1 SV=3	32.5212	30	128	30	1	944	High	High	0.977	-0.03	3.07452e+07	3.14777e+07	0	301.29	30	-0.03	-0.102001	-0.488584	0.312568	1202	0.0157273	FALSE	0.93174
2236	High	Master Protein	O96008	Mitochondrial import receptor subunit TOM40 homolog OS=Homo sapiens GN=TOMM40 PE=1 SV=1	39.3352	12	45	12	1	361	High	High	0.977	-0.03	9.72479e+06	9.95327e+06	0	124.71	12	-0.03	-0.102001	-0.488584	0.312568	1203	0.0157196	FALSE	0.93174
2237	High	Master Protein	Q9NWR8	Calcium uniporter regulatory subunit MCUb, mitochondrial OS=Homo sapiens GN=MCUB PE=1 SV=2	16.369	6	7	6	1	336	High	High	0.977	-0.03	854473	874629	0	19.45	6	-0.03	-0.102001	-0.488584	0.312568	1204	0.0157119	FALSE	0.93174
2238	High	Master Protein	Q9BZE1	39S ribosomal protein L37, mitochondrial OS=Homo sapiens GN=MRPL37 PE=1 SV=2	3.5461	2	3	2	1	423	High	High	0.977	-0.03	39991.8	40940.7	0	4.46	2	-0.03	-0.102001	-0.488584	0.312568	1205	0.0157041	FALSE	0.93174
2239	High	Master Protein	Q15118	[Pyruvate dehydrogenase (acetyl-transferring)] kinase isozyme 1, mitochondrial OS=Homo sapiens GN=PDK1 PE=1 SV=1	3.89908	2	3	2	1	436	High	High	0.977	-0.03	257815	263984	0	2.19	2	-0.03	-0.102001	-0.488584	0.312568	1206	0.0156964	FALSE	0.93174
2241	High	Master Protein	P07737	Profilin-1 OS=Homo sapiens GN=PFN1 PE=1 SV=2	63.5714	10	34	10	1	140	High	High	0.976	-0.03	2.2449e+07	2.29928e+07	0	89.84	10	-0.03	-0.102001	-0.488584	0.312568	1207	0.0156887	FALSE	0.93174
2243	High	Master Protein	P33527	Multidrug resistance-associated protein 1 OS=Homo sapiens GN=ABCC1 PE=1 SV=3	4.70281	6	7	6	1	1531	High	High	0.976	-0.03	288971	295925	0	16.68	6	-0.03	-0.102001	-0.488584	0.312568	1208	0.015681	FALSE	0.93174
2244	High	Master Protein	Q96DG6	Carboxymethylenebutenolidase homolog OS=Homo sapiens GN=CMBL PE=1 SV=1	13.4694	3	4	3	1	245	High	High	0.976	-0.03	344128	352556	0	11.34	3	-0.03	-0.102001	-0.488584	0.312568	1209	0.0156733	FALSE	0.93174
2246	High	Master Protein	P30046	D-dopachrome decarboxylase OS=Homo sapiens GN=DDT PE=1 SV=3	16.1017	2	2	2	1	118	High	High	0.976	-0.03	195589	200335	0	5.16	2	-0.03	-0.102001	-0.488584	0.312568	1210	0.0156655	FALSE	0.93174
2130	High	Master Protein	P43304	Glycerol-3-phosphate dehydrogenase, mitochondrial OS=Homo sapiens GN=GPD2 PE=1 SV=3	44.2916	33	74	33	1	727	High	High	0.99	-0.02	1.78576e+07	1.80462e+07	0	180.84	33	-0.02	-0.0920011	-0.441598	0.32939	1052	0.0168854	FALSE	0.93822
2140	High	Master Protein	Q9UM54	Unconventional myosin-VI OS=Homo sapiens GN=MYO6 PE=1 SV=4	13.9876	18	27	18	1	1294	High	High	0.989	-0.02	2.02856e+06	2.05036e+06	0	56.34	18	-0.02	-0.0920011	-0.441598	0.32939	1053	0.0168777	FALSE	0.93822
2141	High	Master Protein	P20340	Ras-related protein Rab-6A OS=Homo sapiens GN=RAB6A PE=1 SV=3	51.9231	10	42	8	1	208	High	High	0.989	-0.02	2.63906e+06	2.66763e+06	1	109.95	10	-0.02	-0.0920011	-0.441598	0.32939	1054	0.01687	FALSE	0.93822
2142	High	Master Protein	Q14257	Reticulocalbin-2 OS=Homo sapiens GN=RCN2 PE=1 SV=1	19.5584	7	11	6	1	317	High	High	0.989	-0.02	709557	717327	1	15.36	7	-0.02	-0.0920011	-0.441598	0.32939	1055	0.0168623	FALSE	0.93822
2143	High	Master Protein	P78318	Immunoglobulin-binding protein 1 OS=Homo sapiens GN=IGBP1 PE=1 SV=1	13.5693	4	4	4	1	339	High	High	0.989	-0.02	197348	199522	0	5.23	4	-0.02	-0.0920011	-0.441598	0.32939	1056	0.0168545	FALSE	0.93822
2144	High	Master Protein	O94826	Mitochondrial import receptor subunit TOM70 OS=Homo sapiens GN=TOMM70 PE=1 SV=1	35.6908	22	42	22	1	608	High	High	0.988	-0.02	1.48889e+07	1.50753e+07	0	91.22	22	-0.02	-0.0920011	-0.441598	0.32939	1057	0.0168468	FALSE	0.93822
2145	High	Master Protein	P82650	28S ribosomal protein S22, mitochondrial OS=Homo sapiens GN=MRPS22 PE=1 SV=1	32.2222	14	20	14	1	360	High	High	0.988	-0.02	2.00327e+06	2.0286e+06	0	45.31	14	-0.02	-0.0920011	-0.441598	0.32939	1058	0.0168391	FALSE	0.93822
2146	High	Master Protein	Q9NVH1	DnaJ homolog subfamily C member 11 OS=Homo sapiens GN=DNAJC11 PE=1 SV=2	25.2236	11	17	11	1	559	High	High	0.988	-0.02	1.33515e+06	1.35153e+06	0	47.54	11	-0.02	-0.0920011	-0.441598	0.32939	1059	0.0168314	FALSE	0.93822
2147	High	Master Protein	Q9GZY4	Cytochrome c oxidase assembly factor 1 homolog OS=Homo sapiens GN=COA1 PE=1 SV=1	17.1233	3	4	3	1	146	High	High	0.988	-0.02	125490	127044	0	8.52	3	-0.02	-0.0920011	-0.441598	0.32939	1060	0.0168237	FALSE	0.93822
2148	High	Master Protein	P02794	Ferritin heavy chain OS=Homo sapiens GN=FTH1 PE=1 SV=2	26.2295	3	3	3	1	183	High	High	0.988	-0.02	796026	805337	0	8.99	3	-0.02	-0.0920011	-0.441598	0.32939	1061	0.0168159	FALSE	0.93822
2149	High	Master Protein	O15027	Protein transport protein Sec16A OS=Homo sapiens GN=SEC16A PE=1 SV=3	0.780174	2	2	2	1	2179	High	High	0.988	-0.02	452767	458088	0	3.94	2	-0.02	-0.0920011	-0.441598	0.32939	1062	0.0168082	FALSE	0.93822
2150	High	Master Protein	O43795	Unconventional myosin-Ib OS=Homo sapiens GN=MYO1B PE=1 SV=3	15.493	19	33	17	1	1136	High	High	0.987	-0.02	2.74179e+06	2.77872e+06	0	59.76	19	-0.02	-0.0920011	-0.441598	0.32939	1063	0.0168005	FALSE	0.93822
2151	High	Master Protein	Q96AQ6	Pre-B-cell leukemia transcription factor-interacting protein 1 OS=Homo sapiens GN=PBXIP1 PE=1 SV=1	16.2791	10	20	10	1	731	High	High	0.987	-0.02	867093	878511	0	34.56	10	-0.02	-0.0920011	-0.441598	0.32939	1064	0.0167928	FALSE	0.93822
2152	High	Master Protein	Q9Y394	Dehydrogenase/reductase SDR family member 7 OS=Homo sapiens GN=DHRS7 PE=1 SV=1	31.8584	10	20	10	1	339	High	High	0.987	-0.02	3.35229e+06	3.39764e+06	0	55.21	10	-0.02	-0.0920011	-0.441598	0.32939	1065	0.0167851	FALSE	0.93822
2153	High	Master Protein	Q9BZQ8	Protein Niban OS=Homo sapiens GN=FAM129A PE=1 SV=1	10.1293	8	9	8	1	928	High	High	0.987	-0.02	959898	972385	0	12.07	8	-0.02	-0.0920011	-0.441598	0.32939	1066	0.0167773	FALSE	0.93822
2154	High	Master Protein	P32004	Neural cell adhesion molecule L1 OS=Homo sapiens GN=L1CAM PE=1 SV=2	3.89817	5	5	5	1	1257	High	High	0.987	-0.02	367265	371951	0	6.51	5	-0.02	-0.0920011	-0.441598	0.32939	1067	0.0167696	FALSE	0.93822
2155	High	Master Protein	Q969G5	Caveolae-associated protein 3 OS=Homo sapiens GN=CAVIN3 PE=1 SV=3	16.4751	4	5	4	1	261	High	High	0.987	-0.02	381035	385864	0	7.48	4	-0.02	-0.0920011	-0.441598	0.32939	1068	0.0167619	FALSE	0.93822
2156	High	Master Protein	Q9BY49	Peroxisomal trans-2-enoyl-CoA reductase OS=Homo sapiens GN=PECR PE=1 SV=2	10.8911	3	3	3	1	303	High	High	0.987	-0.02	142685	144537	0	4.61	3	-0.02	-0.0920011	-0.441598	0.32939	1069	0.0167542	FALSE	0.93822
2157	High	Master Protein	P60983	Glia maturation factor beta OS=Homo sapiens GN=GMFB PE=1 SV=2	13.3803	2	3	2	1	142	High	High	0.987	-0.02	558943	566478	0	7.3	2	-0.02	-0.0920011	-0.441598	0.32939	1070	0.0167464	FALSE	0.93822
2158	High	Master Protein	Q9BSJ8	Extended synaptotagmin-1 OS=Homo sapiens GN=ESYT1 PE=1 SV=1	26.4493	26	60	26	1	1104	High	High	0.986	-0.02	6.99829e+06	7.09952e+06	0	169.1	26	-0.02	-0.0920011	-0.441598	0.32939	1071	0.0167387	FALSE	0.93822
2159	High	Master Protein	P38117	Electron transfer flavoprotein subunit beta OS=Homo sapiens GN=ETFB PE=1 SV=3	47.8431	12	34	12	1	255	High	High	0.986	-0.02	3.05204e+06	3.09394e+06	0	73.61	12	-0.02	-0.0920011	-0.441598	0.32939	1072	0.016731	FALSE	0.93822
2160	High	Master Protein	Q03252	Lamin-B2 OS=Homo sapiens GN=LMNB2 PE=1 SV=4	19.1935	13	23	11	1	620	High	High	0.986	-0.02	811624	823312	0	33.31	13	-0.02	-0.0920011	-0.441598	0.32939	1073	0.0167233	FALSE	0.93822
2161	High	Master Protein	P10644	cAMP-dependent protein kinase type I-alpha regulatory subunit OS=Homo sapiens GN=PRKAR1A PE=1 SV=1	19.9475	7	14	7	1	381	High	High	0.986	-0.02	1.69048e+06	1.71416e+06	0	34	7	-0.02	-0.0920011	-0.441598	0.32939	1074	0.0167156	FALSE	0.93822
2162	High	Master Protein	Q9Y282	Endoplasmic reticulum-Golgi intermediate compartment protein 3 OS=Homo sapiens GN=ERGIC3 PE=1 SV=1	8.61619	5	6	5	1	383	High	High	0.986	-0.02	1.31301e+06	1.33131e+06	0	6.35	5	-0.02	-0.0920011	-0.441598	0.32939	1075	0.0167078	FALSE	0.93822
2163	High	Master Protein	P05161	Ubiquitin-like protein ISG15 OS=Homo sapiens GN=ISG15 PE=1 SV=5	29.0909	4	6	4	1	165	High	High	0.986	-0.02	1.69198e+06	1.71634e+06	0	12.8	4	-0.02	-0.0920011	-0.441598	0.32939	1076	0.0167001	FALSE	0.93822
2164	High	Master Protein	Q9NPH3	Interleukin-1 receptor accessory protein OS=Homo sapiens GN=IL1RAP PE=1 SV=2	3.15789	2	2	2	1	570	High	High	0.986	-0.02	32353.9	32806	0	3.77	2	-0.02	-0.0920011	-0.441598	0.32939	1077	0.0166924	FALSE	0.93822
2165	High	Master Protein	Q9NRW7	Vacuolar protein sorting-associated protein 45 OS=Homo sapiens GN=VPS45 PE=1 SV=1	3.68421	2	3	2	1	570	High	High	0.986	-0.02	290739	294771	0	7.88	2	-0.02	-0.0920011	-0.441598	0.32939	1078	0.0166847	FALSE	0.93822
2166	High	Master Protein	Q9Y5S9	RNA-binding protein 8A OS=Homo sapiens GN=RBM8A PE=1 SV=1	9.77011	2	3	2	1	174	High	High	0.986	-0.02	139897	141947	0	4.65	2	-0.02	-0.0920011	-0.441598	0.32939	1079	0.016677	FALSE	0.93822
2167	High	Master Protein	P78417	Glutathione S-transferase omega-1 OS=Homo sapiens GN=GSTO1 PE=1 SV=2	33.195	9	17	9	1	241	High	High	0.985	-0.02	6.38662e+06	6.4863e+06	0	39.32	9	-0.02	-0.0920011	-0.441598	0.32939	1080	0.0166692	FALSE	0.93822
2168	High	Master Protein	Q9BRX8	Redox-regulatory protein FAM213A OS=Homo sapiens GN=FAM213A PE=1 SV=3	35.8079	9	22	9	1	229	High	High	0.985	-0.02	2.0362e+06	2.06771e+06	0	48	9	-0.02	-0.0920011	-0.441598	0.32939	1081	0.0166615	FALSE	0.93822
2169	High	Master Protein	O43491	Band 4.1-like protein 2 OS=Homo sapiens GN=EPB41L2 PE=1 SV=1	6.66667	6	10	6	1	1005	High	High	0.985	-0.02	301974	306668	0	18.31	6	-0.02	-0.0920011	-0.441598	0.32939	1082	0.0166538	FALSE	0.93822
2170	High	Master Protein	Q8N1G4	Leucine-rich repeat-containing protein 47 OS=Homo sapiens GN=LRRC47 PE=1 SV=1	10.4631	6	7	6	1	583	High	High	0.985	-0.02	326963	331825	0	12.09	6	-0.02	-0.0920011	-0.441598	0.32939	1083	0.0166461	FALSE	0.93822
2171	High	Master Protein	P09496	Clathrin light chain A OS=Homo sapiens GN=CLTA PE=1 SV=1	18.9516	6	13	6	1	248	High	High	0.985	-0.02	3.02293e+06	3.06999e+06	0	25.85	6	-0.02	-0.0920011	-0.441598	0.32939	1084	0.0166384	FALSE	0.93822
2172	High	Master Protein	O15511	Actin-related protein 2/3 complex subunit 5 OS=Homo sapiens GN=ARPC5 PE=1 SV=3	26.4901	4	7	4	1	151	High	High	0.985	-0.02	1.76875e+06	1.79634e+06	0	15.05	4	-0.02	-0.0920011	-0.441598	0.32939	1085	0.0166306	FALSE	0.93822
2173	High	Master Protein	A8MXV4	Nucleoside diphosphate-linked moiety X motif 19 OS=Homo sapiens GN=NUDT19 PE=1 SV=1	8.8	3	5	3	1	375	High	High	0.985	-0.02	673498	683931	0	10.51	3	-0.02	-0.0920011	-0.441598	0.32939	1086	0.0166229	FALSE	0.93822
2174	High	Master Protein	Q9H490	Phosphatidylinositol glycan anchor biosynthesis class U protein OS=Homo sapiens GN=PIGU PE=1 SV=3	6.2069	2	4	2	1	435	High	High	0.985	-0.02	149006	151285	0	8.8	2	-0.02	-0.0920011	-0.441598	0.32939	1087	0.0166152	FALSE	0.93822
2175	High	Master Protein	Q9H799	Protein JBTS17 OS=Homo sapiens GN=C5orf42 PE=1 SV=4	1.18861	2	2	2	1	3197	High	High	0.985	-0.02	573406	582008	0	0	2	-0.02	-0.0920011	-0.441598	0.32939	1088	0.0166075	FALSE	0.93822
2176	High	Master Protein	Q3SXM5	Inactive hydroxysteroid dehydrogenase-like protein 1 OS=Homo sapiens GN=HSDL1 PE=1 SV=3	8.18182	2	2	2	1	330	High	High	0.985	-0.02	131460	133481	0	2.83	2	-0.02	-0.0920011	-0.441598	0.32939	1089	0.0165998	FALSE	0.93822
2177	High	Master Protein	Q9Y2V7	Conserved oligomeric Golgi complex subunit 6 OS=Homo sapiens GN=COG6 PE=1 SV=2	3.19635	2	3	2	1	657	High	High	0.985	-0.02	84151.9	85397.2	0	0	2	-0.02	-0.0920011	-0.441598	0.32939	1090	0.016592	FALSE	0.93822
2178	High	Master Protein	Q96BW9	Phosphatidate cytidylyltransferase, mitochondrial OS=Homo sapiens GN=TAMM41 PE=1 SV=2	6.85841	2	2	2	1	452	High	High	0.985	-0.02	64316.9	65307.1	0	5.24	2	-0.02	-0.0920011	-0.441598	0.32939	1091	0.0165843	FALSE	0.93822
2179	High	Master Protein	P60981	Destrin OS=Homo sapiens GN=DSTN PE=1 SV=3	76.3636	16	40	15	1	165	High	High	0.984	-0.02	4.53222e+06	4.60499e+06	0	92.08	16	-0.02	-0.0920011	-0.441598	0.32939	1092	0.0165766	FALSE	0.93822
2180	High	Master Protein	Q15286	Ras-related protein Rab-35 OS=Homo sapiens GN=RAB35 PE=1 SV=1	58.209	11	50	8	1	201	High	High	0.984	-0.02	4.03634e+06	4.10355e+06	1	144.56	11	-0.02	-0.0920011	-0.441598	0.32939	1093	0.0165689	FALSE	0.93822
2181	High	Master Protein	Q9NZJ7	Mitochondrial carrier homolog 1 OS=Homo sapiens GN=MTCH1 PE=1 SV=1	14.91	5	8	5	1	389	High	High	0.984	-0.02	1.06796e+06	1.08513e+06	0	16.92	5	-0.02	-0.0920011	-0.441598	0.32939	1094	0.0165611	FALSE	0.93822
2182	High	Master Protein	P62495	Eukaryotic peptide chain release factor subunit 1 OS=Homo sapiens GN=ETF1 PE=1 SV=3	10.2975	4	5	4	1	437	High	High	0.984	-0.02	228169	231853	0	7.88	4	-0.02	-0.0920011	-0.441598	0.32939	1095	0.0165534	FALSE	0.93822
2183	High	Master Protein	Q9P2B2	Prostaglandin F2 receptor negative regulator OS=Homo sapiens GN=PTGFRN PE=1 SV=2	4.43686	3	3	3	1	879	High	High	0.984	-0.02	78135.6	79428.8	0	6.37	3	-0.02	-0.0920011	-0.441598	0.32939	1096	0.0165457	FALSE	0.93822
2184	High	Master Protein	Q9UJX5	Anaphase-promoting complex subunit 4 OS=Homo sapiens GN=ANAPC4 PE=1 SV=2	5.56931	3	3	3	1	808	High	High	0.984	-0.02	126391	128492	0	7.11	3	-0.02	-0.0920011	-0.441598	0.32939	1097	0.016538	FALSE	0.93822
2185	High	Master Protein	P61006	Ras-related protein Rab-8A OS=Homo sapiens GN=RAB8A PE=1 SV=1	28.9855	7	36	3	1	207	High	High	0.984	-0.02	396205	402444	0	106.3	7	-0.02	-0.0920011	-0.441598	0.32939	1098	0.0165303	FALSE	0.93822
2186	High	Master Protein	Q9NVJ2	ADP-ribosylation factor-like protein 8B OS=Homo sapiens GN=ARL8B PE=1 SV=1	53.2258	10	30	3	1	186	High	High	0.984	-0.02	6.20803e+06	6.30766e+06	7	73.84	10	-0.02	-0.0920011	-0.441598	0.32939	1099	0.0165225	FALSE	0.93822
2187	High	Master Protein	Q14980	Nuclear mitotic apparatus protein 1 OS=Homo sapiens GN=NUMA1 PE=1 SV=2	6.28842	12	14	11	1	2115	High	High	0.983	-0.02	446765	454325	1	9.29	12	-0.02	-0.0920011	-0.441598	0.32939	1100	0.0165148	FALSE	0.93822
2188	High	Master Protein	Q15025	TNFAIP3-interacting protein 1 OS=Homo sapiens GN=TNIP1 PE=1 SV=2	13.8365	9	11	9	1	636	High	High	0.983	-0.02	783574	797010	0	16.99	9	-0.02	-0.0920011	-0.441598	0.32939	1101	0.0165071	FALSE	0.93822
2189	High	Master Protein	P52888	Thimet oligopeptidase OS=Homo sapiens GN=THOP1 PE=1 SV=2	12.4819	7	10	7	1	689	High	High	0.983	-0.02	654593	665836	0	15.63	7	-0.02	-0.0920011	-0.441598	0.32939	1102	0.0164994	FALSE	0.93822
2190	High	Master Protein	Q92542	Nicastrin OS=Homo sapiens GN=NCSTN PE=1 SV=2	9.87306	6	12	6	1	709	High	High	0.983	-0.02	798185	812054	0	37.99	6	-0.02	-0.0920011	-0.441598	0.32939	1103	0.0164917	FALSE	0.93822
2191	High	Master Protein	Q9ULC3	Ras-related protein Rab-23 OS=Homo sapiens GN=RAB23 PE=1 SV=1	30.8017	6	8	6	1	237	High	High	0.983	-0.02	348365	354347	0	21.14	6	-0.02	-0.0920011	-0.441598	0.32939	1104	0.0164839	FALSE	0.93822
2192	High	Master Protein	Q8NHP8	Putative phospholipase B-like 2 OS=Homo sapiens GN=PLBD2 PE=1 SV=2	8.9983	4	6	4	1	589	High	High	0.983	-0.02	401596	408414	0	19.6	4	-0.02	-0.0920011	-0.441598	0.32939	1105	0.0164762	FALSE	0.93822
2193	High	Master Protein	P55209	Nucleosome assembly protein 1-like 1 OS=Homo sapiens GN=NAP1L1 PE=1 SV=1	12.0205	5	20	3	1	391	High	High	0.983	-0.02	999861	1.01711e+06	0	58.81	5	-0.02	-0.0920011	-0.441598	0.32939	1106	0.0164685	FALSE	0.93822
2194	High	Master Protein	Q14142	Tripartite motif-containing protein 14 OS=Homo sapiens GN=TRIM14 PE=2 SV=2	9.04977	3	3	3	1	442	High	High	0.983	-0.02	31233	31773.1	0	3.94	3	-0.02	-0.0920011	-0.441598	0.32939	1107	0.0164608	FALSE	0.93822
2195	High	Master Protein	P24390	ER lumen protein-retaining receptor 1 OS=Homo sapiens GN=KDELR1 PE=1 SV=1	18.3962	3	8	2	1	212	High	High	0.983	-0.02	186691	189888	0	18.04	3	-0.02	-0.0920011	-0.441598	0.32939	1108	0.0164531	FALSE	0.93822
2081	High	Master Protein	P23634	Plasma membrane calcium-transporting ATPase 4 OS=Homo sapiens GN=ATP2B4 PE=1 SV=2	23.2071	26	45	13	1	1241	High	High	0.996	-0.01	1.51388e+06	1.52042e+06	0	124.98	26	-0.01	-0.0820011	-0.394612	0.346565	945	0.0177116	FALSE	0.944746
2082	High	Master Protein	Q9Y262	Eukaryotic translation initiation factor 3 subunit L OS=Homo sapiens GN=EIF3L PE=1 SV=1	16.3121	9	14	9	1	564	High	High	0.996	-0.01	1.57146e+06	1.57856e+06	0	22.76	9	-0.01	-0.0820011	-0.394612	0.346565	946	0.0177038	FALSE	0.944746
2083	High	Master Protein	Q96DZ1	Endoplasmic reticulum lectin 1 OS=Homo sapiens GN=ERLEC1 PE=1 SV=1	19.0476	8	11	8	1	483	High	High	0.996	-0.01	723781	726635	0	15.48	8	-0.01	-0.0820011	-0.394612	0.346565	947	0.0176961	FALSE	0.944746
2084	High	Master Protein	P09758	Tumor-associated calcium signal transducer 2 OS=Homo sapiens GN=TACSTD2 PE=1 SV=3	27.5542	7	11	7	1	323	High	High	0.996	-0.01	1725986	1.73211e+06	0	17.52	7	-0.01	-0.0820011	-0.394612	0.346565	948	0.0176884	FALSE	0.944746
2085	High	Master Protein	Q14232	Translation initiation factor eIF-2B subunit alpha OS=Homo sapiens GN=EIF2B1 PE=1 SV=1	20	5	6	5	1	305	High	High	0.996	-0.01	856902	860402	0	17.49	5	-0.01	-0.0820011	-0.394612	0.346565	949	0.0176807	FALSE	0.944746
2086	High	Master Protein	Q8IWA4	Mitofusin-1 OS=Homo sapiens GN=MFN1 PE=1 SV=2	5.26316	4	4	4	1	741	High	High	0.996	-0.01	69209.5	69476.7	0	6.09	4	-0.01	-0.0820011	-0.394612	0.346565	950	0.0176729	FALSE	0.944746
2087	High	Master Protein	Q9BRF8	Serine/threonine-protein phosphatase CPPED1 OS=Homo sapiens GN=CPPED1 PE=1 SV=3	13.6943	4	5	4	1	314	High	High	0.996	-0.01	205694	206442	0	11.1	4	-0.01	-0.0820011	-0.394612	0.346565	951	0.0176652	FALSE	0.944746
2088	High	Master Protein	Q9NWS8	Required for meiotic nuclear division protein 1 homolog OS=Homo sapiens GN=RMND1 PE=1 SV=2	7.34967	3	3	3	1	449	High	High	0.996	-0.01	323675	324878	0	3.83	3	-0.01	-0.0820011	-0.394612	0.346565	952	0.0176575	FALSE	0.944746
2089	High	Master Protein	Q7L3T8	Probable proline--tRNA ligase, mitochondrial OS=Homo sapiens GN=PARS2 PE=1 SV=1	6.10526	2	3	2	1	475	High	High	0.996	-0.01	41628.7	41778.6	0	8.78	2	-0.01	-0.0820011	-0.394612	0.346565	953	0.0176498	FALSE	0.944746
2090	High	Master Protein	Q969Z0	Protein TBRG4 OS=Homo sapiens GN=TBRG4 PE=1 SV=1	17.7496	11	14	11	1	631	High	High	0.995	-0.01	2.93588e+06	2.95099e+06	0	40.6	11	-0.01	-0.0820011	-0.394612	0.346565	954	0.0176421	FALSE	0.944746
2091	High	Master Protein	P31153	S-adenosylmethionine synthase isoform type-2 OS=Homo sapiens GN=MAT2A PE=1 SV=1	17.4684	6	10	6	1	395	High	High	0.995	-0.01	1.16704e+06	1.1725e+06	0	10.2	6	-0.01	-0.0820011	-0.394612	0.346565	955	0.0176343	FALSE	0.944746
2092	High	Master Protein	Q5JTZ9	Alanine--tRNA ligase, mitochondrial OS=Homo sapiens GN=AARS2 PE=1 SV=1	6.70051	6	8	6	1	985	High	High	0.995	-0.01	427780	429986	0	11.74	6	-0.01	-0.0820011	-0.394612	0.346565	956	0.0176266	FALSE	0.944746
2093	High	Master Protein	Q12965	Unconventional myosin-Ie OS=Homo sapiens GN=MYO1E PE=1 SV=2	4.51264	5	8	4	1	1108	High	High	0.995	-0.01	318286	319870	0	6.14	5	-0.01	-0.0820011	-0.394612	0.346565	957	0.0176189	FALSE	0.944746
2094	High	Master Protein	Q96G03	Phosphoglucomutase-2 OS=Homo sapiens GN=PGM2 PE=1 SV=4	7.35294	3	3	3	1	612	High	High	0.995	-0.01	144406	145178	0	7.8	3	-0.01	-0.0820011	-0.394612	0.346565	958	0.0176112	FALSE	0.944746
2095	High	Master Protein	O00115	Deoxyribonuclease-2-alpha OS=Homo sapiens GN=DNASE2 PE=1 SV=2	10.2778	3	3	3	1	360	High	High	0.995	-0.01	157291	158121	0	4.52	3	-0.01	-0.0820011	-0.394612	0.346565	959	0.0176035	FALSE	0.944746
2096	High	Master Protein	P63096	Guanine nucleotide-binding protein G(i) subunit alpha-1 OS=Homo sapiens GN=GNAI1 PE=1 SV=2	29.661	10	25	3	1	354	High	High	0.995	-0.01	362938	364785	0	59.28	10	-0.01	-0.0820011	-0.394612	0.346565	960	0.0175957	FALSE	0.944746
2097	High	Master Protein	Q9H0E2	Toll-interacting protein OS=Homo sapiens GN=TOLLIP PE=1 SV=1	9.48905	2	3	2	1	274	High	High	0.995	-0.01	569310	571951	0	6.6	2	-0.01	-0.0820011	-0.394612	0.346565	961	0.017588	FALSE	0.944746
2098	High	Master Protein	P02786	Transferrin receptor protein 1 OS=Homo sapiens GN=TFRC PE=1 SV=2	36.9737	28	79	28	1	760	High	High	0.994	-0.01	1.66246e+07	1.67302e+07	0	188.75	28	-0.01	-0.0820011	-0.394612	0.346565	962	0.0175803	FALSE	0.944746
2099	High	Master Protein	P09543	2',3'-cyclic-nucleotide 3'-phosphodiesterase OS=Homo sapiens GN=CNP PE=1 SV=2	39.905	18	33	18	1	421	High	High	0.994	-0.01	4.18847e+06	4.21292e+06	0	84.39	18	-0.01	-0.0820011	-0.394612	0.346565	963	0.0175726	FALSE	0.944746
2100	High	Master Protein	O14617	AP-3 complex subunit delta-1 OS=Homo sapiens GN=AP3D1 PE=1 SV=1	14.3972	13	21	13	1	1153	High	High	0.994	-0.01	794483	799227	0	47.54	13	-0.01	-0.0820011	-0.394612	0.346565	964	0.0175649	FALSE	0.944746
2101	High	Master Protein	Q96S52	GPI transamidase component PIG-S OS=Homo sapiens GN=PIGS PE=1 SV=3	12.973	7	11	7	1	555	High	High	0.994	-0.01	1.94734e+06	1.9582e+06	0	26.18	7	-0.01	-0.0820011	-0.394612	0.346565	965	0.0175571	FALSE	0.944746
2102	High	Master Protein	O95793	Double-stranded RNA-binding protein Staufen homolog 1 OS=Homo sapiens GN=STAU1 PE=1 SV=2	9.18544	6	9	6	1	577	High	High	0.994	-0.01	481781	484710	0	14.25	6	-0.01	-0.0820011	-0.394612	0.346565	966	0.0175494	FALSE	0.944746
2103	High	Master Protein	Q9Y696	Chloride intracellular channel protein 4 OS=Homo sapiens GN=CLIC4 PE=1 SV=4	32.8063	6	9	6	1	253	High	High	0.994	-0.01	586022	589811	0	27.38	6	-0.01	-0.0820011	-0.394612	0.346565	967	0.0175417	FALSE	0.944746
2104	High	Master Protein	P82914	28S ribosomal protein S15, mitochondrial OS=Homo sapiens GN=MRPS15 PE=1 SV=1	12.8405	5	6	5	1	257	High	High	0.994	-0.01	739675	743944	0	10.83	5	-0.01	-0.0820011	-0.394612	0.346565	968	0.017534	FALSE	0.944746
2105	High	Master Protein	Q969X5	Endoplasmic reticulum-Golgi intermediate compartment protein 1 OS=Homo sapiens GN=ERGIC1 PE=1 SV=1	17.931	4	6	4	1	290	High	High	0.994	-0.01	977820	983832	0	16.96	4	-0.01	-0.0820011	-0.394612	0.346565	969	0.0175263	FALSE	0.944746
2106	High	Master Protein	O95571	Persulfide dioxygenase ETHE1, mitochondrial OS=Homo sapiens GN=ETHE1 PE=1 SV=2	17.7165	3	5	3	1	254	High	High	0.994	-0.01	384344	386577	0	11.89	3	-0.01	-0.0820011	-0.394612	0.346565	970	0.0175185	FALSE	0.944746
2107	High	Master Protein	Q8IZ83	Aldehyde dehydrogenase family 16 member A1 OS=Homo sapiens GN=ALDH16A1 PE=1 SV=2	3.86534	3	3	3	1	802	High	High	0.994	-0.01	86914.3	87470.2	0	5.27	3	-0.01	-0.0820011	-0.394612	0.346565	971	0.0175108	FALSE	0.944746
2108	High	Master Protein	Q14146	Unhealthy ribosome biogenesis protein 2 homolog OS=Homo sapiens GN=URB2 PE=2 SV=2	2.82152	3	3	3	1	1524	High	High	0.994	-0.01	56045.8	56382.4	0	2.82	3	-0.01	-0.0820011	-0.394612	0.346565	972	0.0175031	FALSE	0.944746
2109	High	Master Protein	P61923	Coatomer subunit zeta-1 OS=Homo sapiens GN=COPZ1 PE=1 SV=1	17.5141	3	6	3	1	177	High	High	0.994	-0.01	451156	453770	0	17.92	3	-0.01	-0.0820011	-0.394612	0.346565	973	0.0174954	FALSE	0.944746
2110	High	Master Protein	Q99714	3-hydroxyacyl-CoA dehydrogenase type-2 OS=Homo sapiens GN=HSD17B10 PE=1 SV=3	72.0307	14	51	14	1	261	High	High	0.993	-0.01	5.07762e+06	5114065	0	169.61	14	-0.01	-0.0820011	-0.394612	0.346565	974	0.0174876	FALSE	0.944746
2111	High	Master Protein	Q9BWM7	Sideroflexin-3 OS=Homo sapiens GN=SFXN3 PE=1 SV=3	52.9595	13	47	11	1	321	High	High	0.993	-0.01	6.08966e+06	6.13289e+06	3	144.67	13	-0.01	-0.0820011	-0.394612	0.346565	975	0.0174799	FALSE	0.944746
2112	High	Master Protein	P40222	Alpha-taxilin OS=Homo sapiens GN=TXLNA PE=1 SV=3	9.15751	6	11	6	1	546	High	High	0.993	-0.01	583278	587234	0	19.83	6	-0.01	-0.0820011	-0.394612	0.346565	976	0.0174722	FALSE	0.944746
2113	High	Master Protein	O94886	CSC1-like protein 1 OS=Homo sapiens GN=TMEM63A PE=1 SV=3	6.56753	5	6	5	1	807	High	High	0.993	-0.01	234638	236326	0	12.83	5	-0.01	-0.0820011	-0.394612	0.346565	977	0.0174645	FALSE	0.944746
2114	High	Master Protein	Q01844	RNA-binding protein EWS OS=Homo sapiens GN=EWSR1 PE=1 SV=1	6.25	4	4	4	1	656	High	High	0.993	-0.01	880582	886963	0	11.79	4	-0.01	-0.0820011	-0.394612	0.346565	978	0.0174568	FALSE	0.944746
2115	High	Master Protein	Q5JSH3	WD repeat-containing protein 44 OS=Homo sapiens GN=WDR44 PE=1 SV=1	3.94304	3	3	3	1	913	High	High	0.993	-0.01	350551	352873	0	8.98	3	-0.01	-0.0820011	-0.394612	0.346565	979	0.017449	FALSE	0.944746
2116	High	Master Protein	Q9H6E4	Coiled-coil domain-containing protein 134 OS=Homo sapiens GN=CCDC134 PE=1 SV=1	11.3537	2	2	2	1	229	High	High	0.993	-0.01	15062.2	15164.7	0	5.76	2	-0.01	-0.0820011	-0.394612	0.346565	980	0.0174413	FALSE	0.944746
2117	High	Master Protein	O94804	Serine/threonine-protein kinase 10 OS=Homo sapiens GN=STK10 PE=1 SV=1	7.02479	7	10	6	1	968	High	High	0.992	-0.01	189780	191221	0	15.32	7	-0.01	-0.0820011	-0.394612	0.346565	981	0.0174336	FALSE	0.944746
2118	High	Master Protein	P54619	5'-AMP-activated protein kinase subunit gamma-1 OS=Homo sapiens GN=PRKAG1 PE=1 SV=1	15.1057	5	8	5	1	331	High	High	0.992	-0.01	676372	681632	0	21.68	5	-0.01	-0.0820011	-0.394612	0.346565	982	0.0174259	FALSE	0.944746
2119	High	Master Protein	O75608	Acyl-protein thioesterase 1 OS=Homo sapiens GN=LYPLA1 PE=1 SV=1	16.9565	4	7	4	1	230	High	High	0.992	-0.01	421947	425497	0	9.02	4	-0.01	-0.0820011	-0.394612	0.346565	983	0.0174182	FALSE	0.944746
2120	High	Master Protein	Q9NP58	ATP-binding cassette sub-family B member 6, mitochondrial OS=Homo sapiens GN=ABCB6 PE=1 SV=1	6.17577	4	4	4	1	842	High	High	0.992	-0.01	209150	210804	0	0	4	-0.01	-0.0820011	-0.394612	0.346565	984	0.0174104	FALSE	0.944746
2121	High	Master Protein	P30479	HLA class I histocompatibility antigen, B-41 alpha chain OS=Homo sapiens GN=HLA-B PE=1 SV=1	46.4088	15	57	2	1	362	High	High	0.992	-0.01	6.45299e+06	6.5045e+06	11	155.12	15	-0.01	-0.0820011	-0.394612	0.346565	985	0.0174027	FALSE	0.944746
2122	High	Master Protein	P28799	Granulins OS=Homo sapiens GN=GRN PE=1 SV=2	23.7774	13	18	13	1	593	High	High	0.991	-0.01	1.50832e+06	1.52227e+06	0	24.58	13	-0.01	-0.0820011	-0.394612	0.346565	986	0.017395	FALSE	0.944746
2123	High	Master Protein	Q12907	Vesicular integral-membrane protein VIP36 OS=Homo sapiens GN=LMAN2 PE=1 SV=1	33.427	12	46	12	1	356	High	High	0.991	-0.01	6.5105e+06	6.56697e+06	0	119.81	12	-0.01	-0.0820011	-0.394612	0.346565	987	0.0173873	FALSE	0.944746
2124	High	Master Protein	Q13443	Disintegrin and metalloproteinase domain-containing protein 9 OS=Homo sapiens GN=ADAM9 PE=1 SV=1	10.1343	9	21	9	1	819	High	High	0.991	-0.01	665797	671526	0	35.46	9	-0.01	-0.0820011	-0.394612	0.346565	988	0.0173796	FALSE	0.944746
2125	High	Master Protein	O14672	Disintegrin and metalloproteinase domain-containing protein 10 OS=Homo sapiens GN=ADAM10 PE=1 SV=1	16.4439	9	10	9	1	748	High	High	0.991	-0.01	1.86639e+06	1.88264e+06	0	20.98	9	-0.01	-0.0820011	-0.394612	0.346565	989	0.0173718	FALSE	0.944746
2126	High	Master Protein	Q5T9A4	ATPase family AAA domain-containing protein 3B OS=Homo sapiens GN=ATAD3B PE=1 SV=1	31.4815	21	37	5	1	648	High	High	0.991	-0.01	555621	560768	0	67.05	21	-0.01	-0.0820011	-0.394612	0.346565	990	0.0173641	FALSE	0.944746
2127	High	Master Protein	P50502	Hsc70-interacting protein OS=Homo sapiens GN=ST13 PE=1 SV=2	8.94309	3	5	3	1	369	High	High	0.991	-0.01	534065	538839	0	16.89	3	-0.01	-0.0820011	-0.394612	0.346565	991	0.0173564	FALSE	0.944746
2128	High	Master Protein	Q9Y676	28S ribosomal protein S18b, mitochondrial OS=Homo sapiens GN=MRPS18B PE=1 SV=1	10.4651	2	2	2	1	258	High	High	0.991	-0.01	128144	129311	0	1.64	2	-0.01	-0.0820011	-0.394612	0.346565	992	0.0173487	FALSE	0.944746
2129	High	Master Protein	Q96HP4	Oxidoreductase NAD-binding domain-containing protein 1 OS=Homo sapiens GN=OXNAD1 PE=1 SV=1	8.01282	3	3	2	1	312	High	High	0.991	-0.01	60582.5	61152.2	0	4.48	3	-0.01	-0.0820011	-0.394612	0.346565	993	0.017341	FALSE	0.944746
2131	High	Master Protein	Q8NBS9	Thioredoxin domain-containing protein 5 OS=Homo sapiens GN=TXNDC5 PE=1 SV=2	37.963	15	41	15	1	432	High	High	0.99	-0.01	9.18414e+06	9.27307e+06	0	132.57	15	-0.01	-0.0820011	-0.394612	0.346565	994	0.0173332	FALSE	0.944746
2132	High	Master Protein	P60953	Cell division control protein 42 homolog OS=Homo sapiens GN=CDC42 PE=1 SV=2	42.4084	8	41	7	1	191	High	High	0.99	-0.01	7.04665e+06	7.1198e+06	0	111.99	8	-0.01	-0.0820011	-0.394612	0.346565	995	0.0173255	FALSE	0.944746
2133	High	Master Protein	Q9Y3B7	39S ribosomal protein L11, mitochondrial OS=Homo sapiens GN=MRPL11 PE=1 SV=1	25.5208	6	8	6	1	192	High	High	0.99	-0.01	1.00664e+06	1.01683e+06	0	12.14	6	-0.01	-0.0820011	-0.394612	0.346565	996	0.0173178	FALSE	0.944746
2134	High	Master Protein	Q9BUV8	Uncharacterized protein C20orf24 OS=Homo sapiens GN=C20orf24 PE=2 SV=1	17.5182	4	5	4	1	137	High	High	0.99	-0.01	605495	611348	0	17.04	4	-0.01	-0.0820011	-0.394612	0.346565	997	0.0173101	FALSE	0.944746
2135	High	Master Protein	Q96PY5	Formin-like protein 2 OS=Homo sapiens GN=FMNL2 PE=1 SV=3	6.35359	7	9	4	1	1086	High	High	0.99	-0.01	705282	712138	3	12.46	7	-0.01	-0.0820011	-0.394612	0.346565	998	0.0173023	FALSE	0.944746
2136	High	Master Protein	Q9HAU4	E3 ubiquitin-protein ligase SMURF2 OS=Homo sapiens GN=SMURF2 PE=1 SV=1	5.61497	4	5	4	1	748	High	High	0.99	-0.01	496567	501385	0	9.57	4	-0.01	-0.0820011	-0.394612	0.346565	999	0.0172946	FALSE	0.944746
2137	High	Master Protein	Q5SW79	Centrosomal protein of 170 kDa OS=Homo sapiens GN=CEP170 PE=1 SV=1	1.89394	3	3	3	1	1584	High	High	0.99	-0.01	90340.9	91214.5	0	4	3	-0.01	-0.0820011	-0.394612	0.346565	1000	0.0172869	FALSE	0.944746
2138	High	Master Protein	Q9NRX2	39S ribosomal protein L17, mitochondrial OS=Homo sapiens GN=MRPL17 PE=1 SV=1	12	3	3	3	1	175	High	High	0.99	-0.01	550071	555438	0	7.01	3	-0.01	-0.0820011	-0.394612	0.346565	1001	0.0172792	FALSE	0.944746
2139	High	Master Protein	Q86YS7	C2 domain-containing protein 5 OS=Homo sapiens GN=C2CD5 PE=1 SV=1	2.2	2	3	2	1	1000	High	High	0.99	-0.01	127911	129206	0	5.98	2	-0.01	-0.0820011	-0.394612	0.346565	1002	0.0172715	FALSE	0.944746
2030	High	Master Protein	P84095	Rho-related GTP-binding protein RhoG OS=Homo sapiens GN=RHOG PE=1 SV=1	45.5497	9	17	8	1	191	High	High	1.003	0	2.36222e+06	2.35453e+06	1	45.78	9	0	-0.0720011	-0.347626	0.36406	829	0.0186072	FALSE	0.951318
2031	High	Master Protein	Q9H7Z7	Prostaglandin E synthase 2 OS=Homo sapiens GN=PTGES2 PE=1 SV=1	14.8541	6	9	6	1	377	High	High	1.003	0	904262	901974	0	16.83	6	0	-0.0720011	-0.347626	0.36406	830	0.0185994	FALSE	0.951318
2032	High	Master Protein	Q8IYI6	Exocyst complex component 8 OS=Homo sapiens GN=EXOC8 PE=1 SV=2	4.41379	4	5	4	1	725	High	High	1.003	0	384339	383040	0	7.94	4	0	-0.0720011	-0.347626	0.36406	831	0.0185917	FALSE	0.951318
2033	High	Master Protein	Q9Y617	Phosphoserine aminotransferase OS=Homo sapiens GN=PSAT1 PE=1 SV=2	10.2703	4	8	4	1	370	High	High	1.003	0	1.014e+06	1010820	0	17.26	4	0	-0.0720011	-0.347626	0.36406	832	0.018584	FALSE	0.951318
2034	High	Master Protein	Q6NUQ1	RAD50-interacting protein 1 OS=Homo sapiens GN=RINT1 PE=1 SV=1	5.17677	3	4	3	1	792	High	High	1.003	0	135036	134601	0	8.29	3	0	-0.0720011	-0.347626	0.36406	833	0.0185763	FALSE	0.951318
2035	High	Master Protein	Q70E73	Ras-associated and pleckstrin homology domains-containing protein 1 OS=Homo sapiens GN=RAPH1 PE=1 SV=3	2.08	2	4	2	1	1250	High	High	1.003	0	443534	442328	0	9.56	2	0	-0.0720011	-0.347626	0.36406	834	0.0185686	FALSE	0.951318
2036	High	Master Protein	Q9Y639	Neuroplastin OS=Homo sapiens GN=NPTN PE=1 SV=2	14.5729	5	8	5	1	398	High	High	1.002	0	593392	592398	0	11.49	5	0	-0.0720011	-0.347626	0.36406	835	0.0185608	FALSE	0.951318
2037	High	Master Protein	O43292	Glycosylphosphatidylinositol anchor attachment 1 protein OS=Homo sapiens GN=GPAA1 PE=1 SV=3	4.66989	4	7	4	1	621	High	High	1.002	0	1.06066e+06	1.05865e+06	0	18.08	4	0	-0.0720011	-0.347626	0.36406	836	0.0185531	FALSE	0.951318
2038	High	Master Protein	Q13042	Cell division cycle protein 16 homolog OS=Homo sapiens GN=CDC16 PE=1 SV=2	7.41935	4	5	4	1	620	High	High	1.002	0	159764	159445	0	7.7	4	0	-0.0720011	-0.347626	0.36406	837	0.0185454	FALSE	0.951318
2039	High	Master Protein	Q9UPT5	Exocyst complex component 7 OS=Homo sapiens GN=EXOC7 PE=1 SV=3	6.53061	4	5	4	1	735	High	High	1.002	0	501478	500453	0	7.85	4	0	-0.0720011	-0.347626	0.36406	838	0.0185377	FALSE	0.951318
2040	High	Master Protein	Q9UN86	Ras GTPase-activating protein-binding protein 2 OS=Homo sapiens GN=G3BP2 PE=1 SV=2	7.88382	3	6	3	1	482	High	High	1.002	0	176215	175778	0	8.25	3	0	-0.0720011	-0.347626	0.36406	839	0.01853	FALSE	0.951318
2041	High	Master Protein	P11413	Glucose-6-phosphate 1-dehydrogenase OS=Homo sapiens GN=G6PD PE=1 SV=4	40	20	44	20	1	515	High	High	1.001	0	8.37747e+06	8.36532e+06	0	109.66	20	0	-0.0720011	-0.347626	0.36406	840	0.0185222	FALSE	0.951318
2042	High	Master Protein	P04233	HLA class II histocompatibility antigen gamma chain OS=Homo sapiens GN=CD74 PE=1 SV=3	21.6216	6	22	6	1	296	High	High	1.001	0	2.90167e+06	2.89944e+06	0	37.82	6	0	-0.0720011	-0.347626	0.36406	841	0.0185145	FALSE	0.951318
2043	High	Master Protein	Q8WXF7	Atlastin-1 OS=Homo sapiens GN=ATL1 PE=1 SV=1	12.5448	6	8	6	1	558	High	High	1.001	0	566087	565358	0	17.65	6	0	-0.0720011	-0.347626	0.36406	842	0.0185068	FALSE	0.951318
2044	High	Master Protein	P82673	28S ribosomal protein S35, mitochondrial OS=Homo sapiens GN=MRPS35 PE=1 SV=1	16.7183	5	8	5	1	323	High	High	1.001	0	1.25481e+06	1.25377e+06	0	13.89	5	0	-0.0720011	-0.347626	0.36406	843	0.0184991	FALSE	0.951318
2045	High	Master Protein	Q9Y3D3	28S ribosomal protein S16, mitochondrial OS=Homo sapiens GN=MRPS16 PE=1 SV=1	35.7664	4	6	4	1	137	High	High	1.001	0	955179	954219	0	11.38	4	0	-0.0720011	-0.347626	0.36406	844	0.0184914	FALSE	0.951318
2046	High	Master Protein	Q8IXI1	Mitochondrial Rho GTPase 2 OS=Homo sapiens GN=RHOT2 PE=1 SV=2	8.89968	4	5	4	1	618	High	High	1.001	0	149682	149515	0	12.45	4	0	-0.0720011	-0.347626	0.36406	845	0.0184836	FALSE	0.951318
2047	High	Master Protein	Q96GC5	39S ribosomal protein L48, mitochondrial OS=Homo sapiens GN=MRPL48 PE=1 SV=2	16.0377	3	6	3	1	212	High	High	1.001	0	306738	306345	0	8.66	3	0	-0.0720011	-0.347626	0.36406	846	0.0184759	FALSE	0.951318
2048	High	Master Protein	O43809	Cleavage and polyadenylation specificity factor subunit 5 OS=Homo sapiens GN=NUDT21 PE=1 SV=1	15.859	3	3	3	1	227	High	High	1.001	0	1.23643e+06	1.23515e+06	0	8.19	3	0	-0.0720011	-0.347626	0.36406	847	0.0184682	FALSE	0.951318
2049	High	Master Protein	O75352	Mannose-P-dolichol utilization defect 1 protein OS=Homo sapiens GN=MPDU1 PE=1 SV=2	17.004	3	6	3	1	247	High	High	1.001	0	1.2774e+06	1.2759e+06	0	20.99	3	0	-0.0720011	-0.347626	0.36406	848	0.0184605	FALSE	0.951318
2050	High	Master Protein	P08727	Keratin, type I cytoskeletal 19 OS=Homo sapiens GN=KRT19 PE=1 SV=4	61.5	30	85	18	1	400	High	High	1	0	1.2147e+07	1.21501e+07	8	186.02	30	0	-0.0720011	-0.347626	0.36406	849	0.0184527	FALSE	0.951318
2051	High	Master Protein	P61106	Ras-related protein Rab-14 OS=Homo sapiens GN=RAB14 PE=1 SV=4	55.3488	14	52	12	1	215	High	High	1	0	7.37693e+06	7.37652e+06	1	145.58	14	0	-0.0720011	-0.347626	0.36406	850	0.018445	FALSE	0.951318
2052	High	Master Protein	P61081	NEDD8-conjugating enzyme Ubc12 OS=Homo sapiens GN=UBE2M PE=1 SV=1	35.5191	7	15	7	1	183	High	High	1	0	733117	732909	0	22.83	7	0	-0.0720011	-0.347626	0.36406	851	0.0184373	FALSE	0.951318
2053	High	Master Protein	P25788	Proteasome subunit alpha type-3 OS=Homo sapiens GN=PSMA3 PE=1 SV=2	22.7451	7	11	7	1	255	High	High	1	0	2.32819e+06	2.3281e+06	0	18.75	7	0	-0.0720011	-0.347626	0.36406	852	0.0184296	FALSE	0.951318
2054	High	Master Protein	P35610	Sterol O-acyltransferase 1 OS=Homo sapiens GN=SOAT1 PE=1 SV=3	14.9091	7	10	7	1	550	High	High	1	0	1.15965e+06	1.1591e+06	0	20.86	7	0	-0.0720011	-0.347626	0.36406	853	0.0184219	FALSE	0.951318
2055	High	Master Protein	P53992	Protein transport protein Sec24C OS=Homo sapiens GN=SEC24C PE=1 SV=3	4.57038	4	7	3	1	1094	High	High	1	0	381490	381560	0	19.31	4	0	-0.0720011	-0.347626	0.36406	854	0.0184141	FALSE	0.951318
2056	High	Master Protein	P49023	Paxillin OS=Homo sapiens GN=PXN PE=1 SV=3	4.56853	2	2	2	1	591	High	High	1	0	85916.7	85874.5	0	2.74	2	0	-0.0720011	-0.347626	0.36406	855	0.0184064	FALSE	0.951318
2057	High	Master Protein	Q6NUK1	Calcium-binding mitochondrial carrier protein SCaMC-1 OS=Homo sapiens GN=SLC25A24 PE=1 SV=2	45.9119	25	106	25	1	477	High	High	0.999	0	4.42448e+07	4.428e+07	0	314.98	25	0	-0.0720011	-0.347626	0.36406	856	0.0183987	FALSE	0.951318
2058	High	Master Protein	P98194	Calcium-transporting ATPase type 2C member 1 OS=Homo sapiens GN=ATP2C1 PE=1 SV=3	14.3634	10	13	10	1	919	High	High	0.999	0	1.01111e+06	1.01207e+06	0	22.39	10	0	-0.0720011	-0.347626	0.36406	857	0.018391	FALSE	0.951318
2059	High	Master Protein	Q03135	Caveolin-1 OS=Homo sapiens GN=CAV1 PE=1 SV=4	43.2584	9	63	9	1	178	High	High	0.999	0	2.27811e+07	2.28129e+07	0	138.6	9	0	-0.0720011	-0.347626	0.36406	858	0.0183833	FALSE	0.951318
2060	High	Master Protein	P07858	Cathepsin B OS=Homo sapiens GN=CTSB PE=1 SV=3	12.6844	4	7	4	1	339	High	High	0.999	0	893282	893754	0	16.59	4	0	-0.0720011	-0.347626	0.36406	859	0.0183755	FALSE	0.951318
2061	High	Master Protein	Q8N766	ER membrane protein complex subunit 1 OS=Homo sapiens GN=EMC1 PE=1 SV=1	16.6163	16	28	16	1	993	High	High	0.998	0	3.90408e+06	3.91124e+06	0	60.51	16	0	-0.0720011	-0.347626	0.36406	860	0.0183678	FALSE	0.951318
2062	High	Master Protein	Q13724	Mannosyl-oligosaccharide glucosidase OS=Homo sapiens GN=MOGS PE=1 SV=5	20.0717	13	31	13	1	837	High	High	0.998	0	3.21313e+06	3.2194e+06	0	83.55	13	0	-0.0720011	-0.347626	0.36406	861	0.0183601	FALSE	0.951318
2063	High	Master Protein	P22059	Oxysterol-binding protein 1 OS=Homo sapiens GN=OSBP PE=1 SV=1	17.4721	12	16	12	1	807	High	High	0.998	0	1.00454e+06	1.00682e+06	0	35.9	12	0	-0.0720011	-0.347626	0.36406	862	0.0183524	FALSE	0.951318
2064	High	Master Protein	Q9Y2G3	Probable phospholipid-transporting ATPase IF OS=Homo sapiens GN=ATP11B PE=1 SV=2	8.41121	10	14	9	1	1177	High	High	0.998	0	923398	925374	1	20.1	10	0	-0.0720011	-0.347626	0.36406	863	0.0183447	FALSE	0.951318
2065	High	Master Protein	Q9H0U4	Ras-related protein Rab-1B OS=Homo sapiens GN=RAB1B PE=1 SV=1	71.1443	15	79	7	1	201	High	High	0.998	0	2.34972e+07	2.3549e+07	8	238.29	15	0	-0.0720011	-0.347626	0.36406	864	0.0183369	FALSE	0.951318
2066	High	Master Protein	Q9NPA0	ER membrane protein complex subunit 7 OS=Homo sapiens GN=EMC7 PE=1 SV=1	16.1157	3	5	3	1	242	High	High	0.998	0	676641	678093	0	13.22	3	0	-0.0720011	-0.347626	0.36406	865	0.0183292	FALSE	0.951318
2067	High	Master Protein	O43617	Trafficking protein particle complex subunit 3 OS=Homo sapiens GN=TRAPPC3 PE=1 SV=1	8.88889	2	2	2	1	180	High	High	0.998	0	169336	169622	0	4.04	2	0	-0.0720011	-0.347626	0.36406	866	0.0183215	FALSE	0.951318
2068	High	Master Protein	P33981	Dual specificity protein kinase TTK OS=Homo sapiens GN=TTK PE=1 SV=2	2.56709	2	2	2	1	857	High	High	0.998	0	43591.2	43665.9	0	2.98	2	0	-0.0720011	-0.347626	0.36406	867	0.0183138	FALSE	0.951318
2069	High	Master Protein	Q9ULM0	Pleckstrin homology domain-containing family H member 1 OS=Homo sapiens GN=PLEKHH1 PE=2 SV=2	1.02639	2	2	2	1	1364	High	High	0.998	0	330242	330950	0	1.72	2	0	-0.0720011	-0.347626	0.36406	868	0.0183061	FALSE	0.951318
2070	High	Master Protein	P54886	Delta-1-pyrroline-5-carboxylate synthase OS=Homo sapiens GN=ALDH18A1 PE=1 SV=2	34.5912	27	65	27	1	795	High	High	0.997	0	7.15895e+06	7.17929e+06	0	123.38	27	0	-0.0720011	-0.347626	0.36406	869	0.0182983	FALSE	0.951318
2071	High	Master Protein	P48960	CD97 antigen OS=Homo sapiens GN=CD97 PE=1 SV=4	14.9701	12	29	12	1	835	High	High	0.997	0	6.57077e+06	6.58789e+06	0	70.07	12	0	-0.0720011	-0.347626	0.36406	870	0.0182906	FALSE	0.951318
2072	High	Master Protein	Q969V3	Nicalin OS=Homo sapiens GN=NCLN PE=1 SV=2	20.9591	11	20	11	1	563	High	High	0.997	0	3.56834e+06	3.58035e+06	0	64.92	11	0	-0.0720011	-0.347626	0.36406	871	0.0182829	FALSE	0.951318
2073	High	Master Protein	Q8IYB8	ATP-dependent RNA helicase SUPV3L1, mitochondrial OS=Homo sapiens GN=SUPV3L1 PE=1 SV=1	12.2137	9	13	9	1	786	High	High	0.997	0	614114	615920	0	22.27	9	0	-0.0720011	-0.347626	0.36406	872	0.0182752	FALSE	0.951318
2074	High	Master Protein	P63208	S-phase kinase-associated protein 1 OS=Homo sapiens GN=SKP1 PE=1 SV=2	28.8344	7	7	7	1	163	High	High	0.997	0	913458	916133	0	12.34	7	0	-0.0720011	-0.347626	0.36406	873	0.0182674	FALSE	0.951318
2075	High	Master Protein	Q9Y3B3	Transmembrane emp24 domain-containing protein 7 OS=Homo sapiens GN=TMED7 PE=1 SV=2	24.5536	4	8	4	1	224	High	High	0.997	0	1.67771e+06	1.68332e+06	0	32.36	4	0	-0.0720011	-0.347626	0.36406	874	0.0182597	FALSE	0.951318
2076	High	Master Protein	Q6ZS17	Rho family-interacting cell polarization regulator 1 OS=Homo sapiens GN=RIPOR1 PE=1 SV=1	4.17007	4	4	4	1	1223	High	High	0.997	0	224569	225139	0	4.2	4	0	-0.0720011	-0.347626	0.36406	875	0.018252	FALSE	0.951318
2077	High	Master Protein	Q9Y399	28S ribosomal protein S2, mitochondrial OS=Homo sapiens GN=MRPS2 PE=1 SV=1	8.78378	3	3	3	1	296	High	High	0.997	0	693559	695482	0	4.84	3	0	-0.0720011	-0.347626	0.36406	876	0.0182443	FALSE	0.951318
2078	High	Master Protein	Q96EK6	Glucosamine 6-phosphate N-acetyltransferase OS=Homo sapiens GN=GNPNAT1 PE=1 SV=1	21.7391	3	4	3	1	184	High	High	0.997	0	155172	155634	0	4.51	3	0	-0.0720011	-0.347626	0.36406	877	0.0182366	FALSE	0.951318
2079	High	Master Protein	Q9UJX4	Anaphase-promoting complex subunit 5 OS=Homo sapiens GN=ANAPC5 PE=1 SV=2	6.09272	3	3	3	1	755	High	High	0.997	0	69979.4	70199	0	5.84	3	0	-0.0720011	-0.347626	0.36406	878	0.0182288	FALSE	0.951318
2080	High	Master Protein	O15231	Zinc finger protein 185 OS=Homo sapiens GN=ZNF185 PE=1 SV=3	4.06386	2	2	2	1	689	High	High	0.997	0	5951.11	5971.35	0	0	2	0	-0.0720011	-0.347626	0.36406	879	0.0182211	FALSE	0.951318
1978	High	Master Protein	A0FGR8	Extended synaptotagmin-2 OS=Homo sapiens GN=ESYT2 PE=1 SV=1	21.4984	18	37	18	1	921	High	High	1.01	0.01	3.20164e+06	3.17034e+06	0	94.16	18	0.01	-0.0620011	-0.30064	0.381844	719	0.0194565	FALSE	0.957934
1979	High	Master Protein	P46977	Dolichyl-diphosphooligosaccharide--protein glycosyltransferase subunit STT3A OS=Homo sapiens GN=STT3A PE=1 SV=2	13.1915	11	32	10	1	705	High	High	1.01	0.01	4.79495e+06	4.74809e+06	0	71.81	11	0.01	-0.0620011	-0.30064	0.381844	720	0.0194487	FALSE	0.957934
1980	High	Master Protein	P07686	Beta-hexosaminidase subunit beta OS=Homo sapiens GN=HEXB PE=1 SV=3	17.2662	9	17	8	1	556	High	High	1.01	0.01	1.86753e+06	1.84939e+06	0	37.96	9	0.01	-0.0620011	-0.30064	0.381844	721	0.019441	FALSE	0.957934
1981	High	Master Protein	Q15031	Probable leucine--tRNA ligase, mitochondrial OS=Homo sapiens GN=LARS2 PE=1 SV=2	6.866	6	9	6	1	903	High	High	1.01	0.01	740813	733790	0	11.06	6	0.01	-0.0620011	-0.30064	0.381844	722	0.0194333	FALSE	0.957934
1982	High	Master Protein	Q13325	Interferon-induced protein with tetratricopeptide repeats 5 OS=Homo sapiens GN=IFIT5 PE=1 SV=1	14.9378	7	11	5	1	482	High	High	1.01	0.01	515984	510875	0	16.18	7	0.01	-0.0620011	-0.30064	0.381844	723	0.0194256	FALSE	0.957934
1983	High	Master Protein	P38646	Stress-70 protein, mitochondrial OS=Homo sapiens GN=HSPA9 PE=1 SV=2	58.1738	47	203	47	1	679	High	High	1.009	0.01	4.75203e+07	4.70855e+07	0	504.2	47	0.01	-0.0620011	-0.30064	0.381844	724	0.0194179	FALSE	0.957934
1984	High	Master Protein	P04843	Dolichyl-diphosphooligosaccharide--protein glycosyltransferase subunit 1 OS=Homo sapiens GN=RPN1 PE=1 SV=1	42.3394	29	115	29	1	607	High	High	1.009	0.01	3.15626e+07	3.12863e+07	0	316.67	29	0.01	-0.0620011	-0.30064	0.381844	725	0.0194101	FALSE	0.957934
1985	High	Master Protein	P11177	Pyruvate dehydrogenase E1 component subunit beta, mitochondrial OS=Homo sapiens GN=PDHB PE=1 SV=3	41.2256	13	57	13	1	359	High	High	1.009	0.01	7.00115e+06	6.93783e+06	0	143.3	13	0.01	-0.0620011	-0.30064	0.381844	726	0.0194024	FALSE	0.957934
1986	High	Master Protein	Q9Y2Q3	Glutathione S-transferase kappa 1 OS=Homo sapiens GN=GSTK1 PE=1 SV=3	53.9823	10	39	10	1	226	High	High	1.009	0.01	5.71289e+06	5.66007e+06	0	101.11	10	0.01	-0.0620011	-0.30064	0.381844	727	0.0193947	FALSE	0.957934
1987	High	Master Protein	O60763	General vesicular transport factor p115 OS=Homo sapiens GN=USO1 PE=1 SV=2	11.0187	10	14	10	1	962	High	High	1.009	0.01	762288	755845	0	24.88	10	0.01	-0.0620011	-0.30064	0.381844	728	0.019387	FALSE	0.957934
1988	High	Master Protein	Q99805	Transmembrane 9 superfamily member 2 OS=Homo sapiens GN=TM9SF2 PE=1 SV=1	16.7421	9	17	9	1	663	High	High	1.009	0.01	1.20268e+06	1.19238e+06	0	41.08	9	0.01	-0.0620011	-0.30064	0.381844	729	0.0193792	FALSE	0.957934
1989	High	Master Protein	P48059	LIM and senescent cell antigen-like-containing domain protein 1 OS=Homo sapiens GN=LIMS1 PE=1 SV=4	20.9231	6	9	5	1	325	High	High	1.009	0.01	774571	767338	1	20.91	6	0.01	-0.0620011	-0.30064	0.381844	730	0.0193715	FALSE	0.957934
1990	High	Master Protein	Q8NFV4	Protein ABHD11 OS=Homo sapiens GN=ABHD11 PE=1 SV=1	13.3333	4	6	4	1	315	High	High	1.009	0.01	666831	661069	0	17.59	4	0.01	-0.0620011	-0.30064	0.381844	731	0.0193638	FALSE	0.957934
1991	High	Master Protein	Q9UGM6	Tryptophan--tRNA ligase, mitochondrial OS=Homo sapiens GN=WARS2 PE=1 SV=1	10.8333	4	8	4	1	360	High	High	1.009	0.01	401050	397298	0	12.05	4	0.01	-0.0620011	-0.30064	0.381844	732	0.0193561	FALSE	0.957934
1992	High	Master Protein	P51153	Ras-related protein Rab-13 OS=Homo sapiens GN=RAB13 PE=1 SV=1	19.2118	4	15	3	1	203	High	High	1.009	0.01	410599	406940	0	44.22	4	0.01	-0.0620011	-0.30064	0.381844	733	0.0193484	FALSE	0.957934
1993	High	Master Protein	Q9BU61	NADH dehydrogenase [ubiquinone] 1 alpha subcomplex assembly factor 3 OS=Homo sapiens GN=NDUFAF3 PE=1 SV=1	24.4565	3	6	3	1	184	High	High	1.009	0.01	352785	349609	0	11.68	3	0.01	-0.0620011	-0.30064	0.381844	734	0.0193406	FALSE	0.957934
1994	High	Master Protein	Q8N5M9	Protein jagunal homolog 1 OS=Homo sapiens GN=JAGN1 PE=1 SV=1	13.6612	3	5	3	1	183	High	High	1.009	0.01	668433	662193	0	18.37	3	0.01	-0.0620011	-0.30064	0.381844	735	0.0193329	FALSE	0.957934
1995	High	Master Protein	Q6NUK4	Receptor expression-enhancing protein 3 OS=Homo sapiens GN=REEP3 PE=1 SV=1	10.1961	2	4	2	1	255	High	High	1.009	0.01	311889	309252	0	12.63	2	0.01	-0.0620011	-0.30064	0.381844	736	0.0193252	FALSE	0.957934
1996	High	Master Protein	Q9BXF6	Rab11 family-interacting protein 5 OS=Homo sapiens GN=RAB11FIP5 PE=1 SV=1	3.67534	2	3	2	1	653	High	High	1.009	0.01	166534	165085	0	11.13	2	0.01	-0.0620011	-0.30064	0.381844	737	0.0193175	FALSE	0.957934
1997	High	Master Protein	P21589	5'-nucleotidase OS=Homo sapiens GN=NT5E PE=1 SV=1	26.4808	14	33	14	1	574	High	High	1.008	0.01	4.54732e+06	4.51181e+06	0	103.04	14	0.01	-0.0620011	-0.30064	0.381844	738	0.0193098	FALSE	0.957934
1998	High	Master Protein	Q9BW92	Threonine--tRNA ligase, mitochondrial OS=Homo sapiens GN=TARS2 PE=1 SV=1	9.1922	6	9	6	1	718	High	High	1.008	0.01	323236	320565	0	10.33	6	0.01	-0.0620011	-0.30064	0.381844	739	0.019302	FALSE	0.957934
1999	High	Master Protein	Q9P035	Very-long-chain (3R)-3-hydroxyacyl-CoA dehydratase 3 OS=Homo sapiens GN=HACD3 PE=1 SV=2	19.8895	9	20	9	1	362	High	High	1.007	0.01	2.57195e+06	2.5548e+06	0	46.71	9	0.01	-0.0620011	-0.30064	0.381844	740	0.0192943	FALSE	0.957934
2000	High	Master Protein	Q6UW68	Transmembrane protein 205 OS=Homo sapiens GN=TMEM205 PE=1 SV=1	28.0423	5	18	5	1	189	High	High	1.007	0.01	2.19401e+06	2.1789e+06	0	40.26	5	0.01	-0.0620011	-0.30064	0.381844	741	0.0192866	FALSE	0.957934
2001	High	Master Protein	Q96S66	Chloride channel CLIC-like protein 1 OS=Homo sapiens GN=CLCC1 PE=1 SV=1	9.61887	5	5	5	1	551	High	High	1.007	0.01	820150	814761	0	15.79	5	0.01	-0.0620011	-0.30064	0.381844	742	0.0192789	FALSE	0.957934
2002	High	Master Protein	P60900	Proteasome subunit alpha type-6 OS=Homo sapiens GN=PSMA6 PE=1 SV=1	21.1382	5	7	5	1	246	High	High	1.007	0.01	687534	682506	0	14.49	5	0.01	-0.0620011	-0.30064	0.381844	743	0.0192712	FALSE	0.957934
2003	High	Master Protein	P22830	Ferrochelatase, mitochondrial OS=Homo sapiens GN=FECH PE=1 SV=2	9.45626	4	5	4	1	423	High	High	1.007	0.01	581617	577776	0	14.2	4	0.01	-0.0620011	-0.30064	0.381844	744	0.0192634	FALSE	0.957934
2004	High	Master Protein	O95716	Ras-related protein Rab-3D OS=Homo sapiens GN=RAB3D PE=1 SV=1	23.2877	6	17	3	1	219	High	High	1.007	0.01	133687	132777	0	49.46	6	0.01	-0.0620011	-0.30064	0.381844	745	0.0192557	FALSE	0.957934
2005	High	Master Protein	Q9H4G0	Band 4.1-like protein 1 OS=Homo sapiens GN=EPB41L1 PE=1 SV=2	3.29171	3	5	3	1	881	High	High	1.007	0.01	349400	346922	0	12.61	3	0.01	-0.0620011	-0.30064	0.381844	746	0.019248	FALSE	0.957934
2006	High	Master Protein	Q13428	Treacle protein OS=Homo sapiens GN=TCOF1 PE=1 SV=3	1.41129	2	3	2	1	1488	High	High	1.007	0.01	35060.5	34833.9	0	0	2	0.01	-0.0620011	-0.30064	0.381844	747	0.0192403	FALSE	0.957934
2007	High	Master Protein	Q9H9Q2	COP9 signalosome complex subunit 7b OS=Homo sapiens GN=COPS7B PE=1 SV=1	7.57576	2	2	2	1	264	High	High	1.007	0.01	303176	301166	0	3.37	2	0.01	-0.0620011	-0.30064	0.381844	748	0.0192326	FALSE	0.957934
2008	High	Master Protein	Q12849	G-rich sequence factor 1 OS=Homo sapiens GN=GRSF1 PE=1 SV=3	8.75	2	3	2	1	480	High	High	1.007	0.01	109609	108823	0	14.52	2	0.01	-0.0620011	-0.30064	0.381844	749	0.0192248	FALSE	0.957934
2009	High	Master Protein	Q14728	Major facilitator superfamily domain-containing protein 10 OS=Homo sapiens GN=MFSD10 PE=1 SV=1	4.83516	2	5	2	1	455	High	High	1.007	0.01	285599	283629	0	10.61	2	0.01	-0.0620011	-0.30064	0.381844	750	0.0192171	FALSE	0.957934
2010	High	Master Protein	P51659	Peroxisomal multifunctional enzyme type 2 OS=Homo sapiens GN=HSD17B4 PE=1 SV=3	35.3261	27	52	27	1	736	High	High	1.006	0.01	8.05318e+06	8.00368e+06	0	134.96	27	0.01	-0.0620011	-0.30064	0.381844	751	0.0192094	FALSE	0.957934
2011	High	Master Protein	O60313	Dynamin-like 120 kDa protein, mitochondrial OS=Homo sapiens GN=OPA1 PE=1 SV=3	24.0625	20	26	20	1	960	High	High	1.006	0.01	2.35549e+06	2.34183e+06	0	57.12	20	0.01	-0.0620011	-0.30064	0.381844	752	0.0192017	FALSE	0.957934
2012	High	Master Protein	Q96A33	Coiled-coil domain-containing protein 47 OS=Homo sapiens GN=CCDC47 PE=1 SV=1	34.1615	16	24	16	1	483	High	High	1.006	0.01	5.40623e+06	5.37213e+06	0	60.11	16	0.01	-0.0620011	-0.30064	0.381844	753	0.0191939	FALSE	0.957934
2013	High	Master Protein	P14923	Junction plakoglobin OS=Homo sapiens GN=JUP PE=1 SV=3	19.8658	12	22	9	1	745	High	High	1.006	0.01	1.88355e+06	1.87287e+06	3	38.76	12	0.01	-0.0620011	-0.30064	0.381844	754	0.0191862	FALSE	0.957934
2014	High	Master Protein	Q14197	Peptidyl-tRNA hydrolase ICT1, mitochondrial OS=Homo sapiens GN=MRPL58 PE=1 SV=1	20.8738	4	5	4	1	206	High	High	1.006	0.01	680576	676394	0	13.78	4	0.01	-0.0620011	-0.30064	0.381844	755	0.0191785	FALSE	0.957934
2015	High	Master Protein	O43395	U4/U6 small nuclear ribonucleoprotein Prp3 OS=Homo sapiens GN=PRPF3 PE=1 SV=2	5.56369	3	4	3	1	683	High	High	1.006	0.01	266013	264370	0	5.25	3	0.01	-0.0620011	-0.30064	0.381844	756	0.0191708	FALSE	0.957934
2016	High	Master Protein	Q96EK7	Constitutive coactivator of peroxisome proliferator-activated receptor gamma OS=Homo sapiens GN=FAM120B PE=1 SV=1	2.96703	2	2	2	1	910	High	High	1.006	0.01	74935.1	74517.1	0	3.14	2	0.01	-0.0620011	-0.30064	0.381844	757	0.0191631	FALSE	0.957934
2017	High	Master Protein	O95379	Tumor necrosis factor alpha-induced protein 8 OS=Homo sapiens GN=TNFAIP8 PE=1 SV=1	11.1111	2	2	2	1	198	High	High	1.006	0.01	143919	142995	0	2.8	2	0.01	-0.0620011	-0.30064	0.381844	758	0.0191553	FALSE	0.957934
2018	High	Master Protein	Q6NZ67	Mitotic-spindle organizing protein 2B OS=Homo sapiens GN=MZT2B PE=1 SV=1	12.6582	2	2	2	1	158	High	High	1.006	0.01	101532	100931	0	5.78	2	0.01	-0.0620011	-0.30064	0.381844	759	0.0191476	FALSE	0.957934
2019	High	Master Protein	Q9H857	5'-nucleotidase domain-containing protein 2 OS=Homo sapiens GN=NT5DC2 PE=1 SV=1	3.07692	2	3	2	1	520	High	High	1.006	0.01	378690	376451	0	6.59	2	0.01	-0.0620011	-0.30064	0.381844	760	0.0191399	FALSE	0.957934
2020	High	Master Protein	Q12931	Heat shock protein 75 kDa, mitochondrial OS=Homo sapiens GN=TRAP1 PE=1 SV=3	26.7045	18	43	17	1	704	High	High	1.005	0.01	6.80011e+06	6.76813e+06	0	96.18	18	0.01	-0.0620011	-0.30064	0.381844	761	0.0191322	FALSE	0.957934
2021	High	Master Protein	Q99873	Protein arginine N-methyltransferase 1 OS=Homo sapiens GN=PRMT1 PE=1 SV=2	36.2881	14	28	14	1	361	High	High	1.005	0.01	2.13116e+06	2.12149e+06	0	46.96	14	0.01	-0.0620011	-0.30064	0.381844	762	0.0191245	FALSE	0.957934
2022	High	Master Protein	O43665	Regulator of G-protein signaling 10 OS=Homo sapiens GN=RGS10 PE=1 SV=2	15.6069	2	4	2	1	173	High	High	1.005	0.01	114344	113743	0	4.4	2	0.01	-0.0620011	-0.30064	0.381844	763	0.0191167	FALSE	0.957934
2023	High	Master Protein	Q15036	Sorting nexin-17 OS=Homo sapiens GN=SNX17 PE=1 SV=1	6.80851	2	4	2	1	470	High	High	1.005	0.01	256469	255070	0	4.26	2	0.01	-0.0620011	-0.30064	0.381844	764	0.019109	FALSE	0.957934
2024	High	Master Protein	Q15058	Kinesin-like protein KIF14 OS=Homo sapiens GN=KIF14 PE=1 SV=1	6.61408	12	15	12	1	1648	High	High	1.004	0.01	903822	900371	0	17.24	12	0.01	-0.0620011	-0.30064	0.381844	765	0.0191013	FALSE	0.957934
2025	High	Master Protein	Q9P0J1	[Pyruvate dehydrogenase [acetyl-transferring]]-phosphatase 1, mitochondrial OS=Homo sapiens GN=PDP1 PE=1 SV=3	16.0149	7	11	7	1	537	High	High	1.004	0.01	1.83344e+06	1.82527e+06	0	39.07	7	0.01	-0.0620011	-0.30064	0.381844	766	0.0190936	FALSE	0.957934
2026	High	Master Protein	Q9P2R3	Rabankyrin-5 OS=Homo sapiens GN=ANKFY1 PE=1 SV=2	6.41574	6	9	6	1	1169	High	High	1.004	0.01	469438	467614	0	18.3	6	0.01	-0.0620011	-0.30064	0.381844	767	0.0190859	FALSE	0.957934
2027	High	Master Protein	O00422	Histone deacetylase complex subunit SAP18 OS=Homo sapiens GN=SAP18 PE=1 SV=1	22.8758	4	6	4	1	153	High	High	1.004	0.01	616440	613883	0	12.43	4	0.01	-0.0620011	-0.30064	0.381844	768	0.0190781	FALSE	0.957934
2028	High	Master Protein	Q9Y450	HBS1-like protein OS=Homo sapiens GN=HBS1L PE=1 SV=1	8.04094	4	4	4	1	684	High	High	1.004	0.01	121336	120852	0	4.98	4	0.01	-0.0620011	-0.30064	0.381844	769	0.0190704	FALSE	0.957934
2029	High	Master Protein	Q9BWD1	Acetyl-CoA acetyltransferase, cytosolic OS=Homo sapiens GN=ACAT2 PE=1 SV=2	4.78589	2	2	2	1	397	High	High	1.004	0.01	13578.7	13523.7	0	1.8	2	0.01	-0.0620011	-0.30064	0.381844	770	0.0190627	FALSE	0.957934
1893	High	Master Protein	P27824	Calnexin OS=Homo sapiens GN=CANX PE=1 SV=2	50.3378	44	197	42	1	592	High	High	1.017	0.02	6.15835e+07	6.05587e+07	2	470.26	44	0.02	-0.0520011	-0.253654	0.399881	581	0.0205219	FALSE	0.964597
1894	High	Master Protein	P14735	Insulin-degrading enzyme OS=Homo sapiens GN=IDE PE=1 SV=4	15.211	13	18	13	1	1019	High	High	1.017	0.02	1.68122e+06	1.65382e+06	0	41.08	13	0.02	-0.0520011	-0.253654	0.399881	582	0.0205142	FALSE	0.964597
1895	High	Master Protein	Q86UE4	Protein LYRIC OS=Homo sapiens GN=MTDH PE=1 SV=2	16.1512	8	23	8	1	582	High	High	1.017	0.02	1.18573e+06	1.16609e+06	0	59.94	8	0.02	-0.0520011	-0.253654	0.399881	583	0.0205065	FALSE	0.964597
1896	High	Master Protein	P30626	Sorcin OS=Homo sapiens GN=SRI PE=1 SV=1	31.3131	6	7	6	1	198	High	High	1.017	0.02	766233	753323	0	18.24	6	0.02	-0.0520011	-0.253654	0.399881	584	0.0204988	FALSE	0.964597
1897	High	Master Protein	P43034	Platelet-activating factor acetylhydrolase IB subunit alpha OS=Homo sapiens GN=PAFAH1B1 PE=1 SV=2	14.6341	6	8	5	1	410	High	High	1.017	0.02	2.8269e+06	2.77834e+06	0	14.48	6	0.02	-0.0520011	-0.253654	0.399881	585	0.020491	FALSE	0.964597
1898	High	Master Protein	O95671	N-acetylserotonin O-methyltransferase-like protein OS=Homo sapiens GN=ASMTL PE=1 SV=3	12.3994	5	5	5	1	621	High	High	1.017	0.02	199046	195686	0	11.14	5	0.02	-0.0520011	-0.253654	0.399881	586	0.0204833	FALSE	0.964597
1899	High	Master Protein	Q9Y570	Protein phosphatase methylesterase 1 OS=Homo sapiens GN=PPME1 PE=1 SV=3	12.6943	4	5	4	1	386	High	High	1.017	0.02	416039	409037	0	13.01	4	0.02	-0.0520011	-0.253654	0.399881	587	0.0204756	FALSE	0.964597
1900	High	Master Protein	Q16222	UDP-N-acetylhexosamine pyrophosphorylase OS=Homo sapiens GN=UAP1 PE=1 SV=3	11.3027	5	7	4	1	522	High	High	1.017	0.02	492477	484240	0	15.89	5	0.02	-0.0520011	-0.253654	0.399881	588	0.0204679	FALSE	0.964597
1901	High	Master Protein	P60510	Serine/threonine-protein phosphatase 4 catalytic subunit OS=Homo sapiens GN=PPP4C PE=1 SV=1	13.0293	3	6	3	1	307	High	High	1.017	0.02	128386	126270	0	11.18	3	0.02	-0.0520011	-0.253654	0.399881	589	0.0204602	FALSE	0.964597
1902	High	Master Protein	P51784	Ubiquitin carboxyl-terminal hydrolase 11 OS=Homo sapiens GN=USP11 PE=1 SV=3	3.11526	3	3	3	1	963	High	High	1.017	0.02	91383.8	89892.4	0	1.62	3	0.02	-0.0520011	-0.253654	0.399881	590	0.0204524	FALSE	0.964597
1903	High	Master Protein	O14735	CDP-diacylglycerol--inositol 3-phosphatidyltransferase OS=Homo sapiens GN=CDIPT PE=1 SV=1	14.0845	3	6	3	1	213	High	High	1.017	0.02	453054	445472	0	14.52	3	0.02	-0.0520011	-0.253654	0.399881	591	0.0204447	FALSE	0.964597
1904	High	Master Protein	Q96Q11	CCA tRNA nucleotidyltransferase 1, mitochondrial OS=Homo sapiens GN=TRNT1 PE=1 SV=2	5.29954	2	2	2	1	434	High	High	1.017	0.02	106507	104770	0	4.38	2	0.02	-0.0520011	-0.253654	0.399881	592	0.020437	FALSE	0.964597
1905	High	Master Protein	Q13948	Protein CASP OS=Homo sapiens GN=CUX1 PE=1 SV=2	2.94985	2	3	2	1	678	High	High	1.017	0.02	69287	68142.5	0	1.6	2	0.02	-0.0520011	-0.253654	0.399881	593	0.0204293	FALSE	0.964597
1906	High	Master Protein	P18440	Arylamine N-acetyltransferase 1 OS=Homo sapiens GN=NAT1 PE=1 SV=2	8.96552	2	2	2	1	290	High	High	1.017	0.02	103824	102126	0	5.29	2	0.02	-0.0520011	-0.253654	0.399881	594	0.0204216	FALSE	0.964597
1907	High	Master Protein	P49903	Selenide, water dikinase 1 OS=Homo sapiens GN=SEPHS1 PE=1 SV=2	7.90816	2	2	2	1	392	High	High	1.017	0.02	86744.4	85316.9	0	2.16	2	0.02	-0.0520011	-0.253654	0.399881	595	0.0204138	FALSE	0.964597
1908	High	Master Protein	Q68E01	Integrator complex subunit 3 OS=Homo sapiens GN=INTS3 PE=1 SV=1	2.49281	2	4	2	1	1043	High	High	1.017	0.02	151556	149091	0	9.7	2	0.02	-0.0520011	-0.253654	0.399881	596	0.0204061	FALSE	0.964597
1909	High	Master Protein	P30101	Protein disulfide-isomerase A3 OS=Homo sapiens GN=PDIA3 PE=1 SV=4	58.2178	36	151	36	1	505	High	High	1.016	0.02	5.71238e+07	5.62002e+07	0	382.27	36	0.02	-0.0520011	-0.253654	0.399881	597	0.0203984	FALSE	0.964597
1910	High	Master Protein	O43615	Mitochondrial import inner membrane translocase subunit TIM44 OS=Homo sapiens GN=TIMM44 PE=1 SV=2	41.1504	19	32	19	1	452	High	High	1.016	0.02	2.95208e+06	2.90677e+06	0	63.98	19	0.02	-0.0520011	-0.253654	0.399881	598	0.0203907	FALSE	0.964597
1911	High	Master Protein	Q9Y2A7	Nck-associated protein 1 OS=Homo sapiens GN=NCKAP1 PE=1 SV=1	14.6277	15	21	15	1	1128	High	High	1.016	0.02	1.85314e+06	1.82315e+06	0	39.64	15	0.02	-0.0520011	-0.253654	0.399881	599	0.020383	FALSE	0.964597
1912	High	Master Protein	Q6UB35	Monofunctional C1-tetrahydrofolate synthase, mitochondrial OS=Homo sapiens GN=MTHFD1L PE=1 SV=1	12.7812	11	18	10	1	978	High	High	1.016	0.02	570316	561181	0	23.19	11	0.02	-0.0520011	-0.253654	0.399881	600	0.0203752	FALSE	0.964597
1913	High	Master Protein	Q8NBJ7	Sulfatase-modifying factor 2 OS=Homo sapiens GN=SUMF2 PE=1 SV=2	32.5581	9	16	9	1	301	High	High	1.016	0.02	1.87035e+06	1.84015e+06	0	38.13	9	0.02	-0.0520011	-0.253654	0.399881	601	0.0203675	FALSE	0.964597
1914	High	Master Protein	Q9Y6Y8	SEC23-interacting protein OS=Homo sapiens GN=SEC23IP PE=1 SV=1	9	9	18	8	1	1000	High	High	1.016	0.02	742521	730645	0	38.63	9	0.02	-0.0520011	-0.253654	0.399881	602	0.0203598	FALSE	0.964597
1915	High	Master Protein	Q9Y3E5	Peptidyl-tRNA hydrolase 2, mitochondrial OS=Homo sapiens GN=PTRH2 PE=1 SV=1	51.3966	7	20	7	1	179	High	High	1.016	0.02	1.37289e+06	1.35103e+06	0	70.37	7	0.02	-0.0520011	-0.253654	0.399881	603	0.0203521	FALSE	0.964597
1916	High	Master Protein	Q6P1M0	Long-chain fatty acid transport protein 4 OS=Homo sapiens GN=SLC27A4 PE=1 SV=1	13.3748	8	11	6	1	643	High	High	1.016	0.02	814214	801266	2	14.7	8	0.02	-0.0520011	-0.253654	0.399881	604	0.0203443	FALSE	0.964597
1917	High	Master Protein	Q9NRK6	ATP-binding cassette sub-family B member 10, mitochondrial OS=Homo sapiens GN=ABCB10 PE=1 SV=2	9.34959	6	9	6	1	738	High	High	1.016	0.02	1.25074e+06	1.23111e+06	0	28.58	6	0.02	-0.0520011	-0.253654	0.399881	605	0.0203366	FALSE	0.964597
1918	High	Master Protein	Q6P4E1	Protein CASC4 OS=Homo sapiens GN=CASC4 PE=1 SV=1	12.0092	5	6	5	1	433	High	High	1.016	0.02	182110	179190	0	10.2	5	0.02	-0.0520011	-0.253654	0.399881	606	0.0203289	FALSE	0.964597
1919	High	Master Protein	O15127	Secretory carrier-associated membrane protein 2 OS=Homo sapiens GN=SCAMP2 PE=1 SV=2	16.1094	4	8	4	1	329	High	High	1.016	0.02	654189	643675	0	17.73	4	0.02	-0.0520011	-0.253654	0.399881	607	0.0203212	FALSE	0.964597
1920	High	Master Protein	Q9P0M9	39S ribosomal protein L27, mitochondrial OS=Homo sapiens GN=MRPL27 PE=1 SV=1	24.3243	3	6	3	1	148	High	High	1.016	0.02	1.21671e+06	1.19697e+06	0	16.29	3	0.02	-0.0520011	-0.253654	0.399881	608	0.0203135	FALSE	0.964597
1921	High	Master Protein	Q7Z7M9	Polypeptide N-acetylgalactosaminyltransferase 5 OS=Homo sapiens GN=GALNT5 PE=1 SV=1	3.08511	3	3	3	1	940	High	High	1.016	0.02	293150	288649	0	1.64	3	0.02	-0.0520011	-0.253654	0.399881	609	0.0203057	FALSE	0.964597
1922	High	Master Protein	Q13884	Beta-1-syntrophin OS=Homo sapiens GN=SNTB1 PE=1 SV=3	6.69145	4	5	3	1	538	High	High	1.016	0.02	266169	261930	0	9.11	4	0.02	-0.0520011	-0.253654	0.399881	610	0.020298	FALSE	0.964597
1923	High	Master Protein	O75381	Peroxisomal membrane protein PEX14 OS=Homo sapiens GN=PEX14 PE=1 SV=1	12.2016	3	5	3	1	377	High	High	1.016	0.02	1.13302e+06	1.11547e+06	0	12.69	3	0.02	-0.0520011	-0.253654	0.399881	611	0.0202903	FALSE	0.964597
1924	High	Master Protein	P53365	Arfaptin-2 OS=Homo sapiens GN=ARFIP2 PE=1 SV=1	14.956	4	4	3	1	341	High	High	1.016	0.02	170817	168195	0	2.94	4	0.02	-0.0520011	-0.253654	0.399881	612	0.0202826	FALSE	0.964597
1925	High	Master Protein	Q5BJF2	Transmembrane protein 97 OS=Homo sapiens GN=TMEM97 PE=1 SV=1	13.0682	3	8	3	1	176	High	High	1.016	0.02	874604	860437	0	30.77	3	0.02	-0.0520011	-0.253654	0.399881	613	0.0202749	FALSE	0.964597
1926	High	Master Protein	Q13393	Phospholipase D1 OS=Homo sapiens GN=PLD1 PE=1 SV=1	1.67598	2	3	2	1	1074	High	High	1.016	0.02	265194	261015	0	7.13	2	0.02	-0.0520011	-0.253654	0.399881	614	0.0202671	FALSE	0.964597
1927	High	Master Protein	Q9NVV4	Poly(A) RNA polymerase, mitochondrial OS=Homo sapiens GN=MTPAP PE=1 SV=1	3.78007	2	3	2	1	582	High	High	1.016	0.02	141599	139397	0	7.17	2	0.02	-0.0520011	-0.253654	0.399881	615	0.0202594	FALSE	0.964597
1928	High	Master Protein	Q9NYU2	UDP-glucose:glycoprotein glucosyltransferase 1 OS=Homo sapiens GN=UGGT1 PE=1 SV=3	21.6077	31	55	31	1	1555	High	High	1.015	0.02	9.3808e+06	9.24091e+06	0	142.33	31	0.02	-0.0520011	-0.253654	0.399881	616	0.0202517	FALSE	0.964597
1929	High	Master Protein	P30837	Aldehyde dehydrogenase X, mitochondrial OS=Homo sapiens GN=ALDH1B1 PE=1 SV=3	30.1741	13	24	12	1	517	High	High	1.015	0.02	2.37451e+06	2.33836e+06	0	61.53	13	0.02	-0.0520011	-0.253654	0.399881	617	0.020244	FALSE	0.964597
1930	High	Master Protein	O15031	Plexin-B2 OS=Homo sapiens GN=PLXNB2 PE=1 SV=3	8.10664	12	16	12	1	1838	High	High	1.015	0.02	1.29087e+06	1.27196e+06	0	41.33	12	0.02	-0.0520011	-0.253654	0.399881	618	0.0202363	FALSE	0.964597
1931	High	Master Protein	P61158	Actin-related protein 3 OS=Homo sapiens GN=ACTR3 PE=1 SV=3	32.5359	11	29	11	1	418	High	High	1.015	0.02	3.04623e+06	3.00071e+06	0	65.84	11	0.02	-0.0520011	-0.253654	0.399881	619	0.0202285	FALSE	0.964597
1932	High	Master Protein	P27694	Replication protein A 70 kDa DNA-binding subunit OS=Homo sapiens GN=RPA1 PE=1 SV=2	16.8831	10	13	10	1	616	High	High	1.015	0.02	727502	716460	0	15.56	10	0.02	-0.0520011	-0.253654	0.399881	620	0.0202208	FALSE	0.964597
1933	High	Master Protein	P62330	ADP-ribosylation factor 6 OS=Homo sapiens GN=ARF6 PE=1 SV=2	31.4286	6	23	6	1	175	High	High	1.015	0.02	3.77065e+06	3.71496e+06	0	69.6	6	0.02	-0.0520011	-0.253654	0.399881	621	0.0202131	FALSE	0.964597
1934	High	Master Protein	P10301	Ras-related protein R-Ras OS=Homo sapiens GN=RRAS PE=1 SV=1	31.6514	7	23	5	1	218	High	High	1.015	0.02	1.37082e+06	1.35055e+06	0	54.87	7	0.02	-0.0520011	-0.253654	0.399881	622	0.0202054	FALSE	0.964597
1935	High	Master Protein	P29353	SHC-transforming protein 1 OS=Homo sapiens GN=SHC1 PE=1 SV=4	6.86106	3	3	3	1	583	High	High	1.015	0.02	163482	161013	0	2.76	3	0.02	-0.0520011	-0.253654	0.399881	623	0.0201977	FALSE	0.964597
1936	High	Master Protein	Q15388	Mitochondrial import receptor subunit TOM20 homolog OS=Homo sapiens GN=TOMM20 PE=1 SV=1	17.2414	3	15	3	1	145	High	High	1.015	0.02	4.70921e+06	4.63847e+06	0	21.69	3	0.02	-0.0520011	-0.253654	0.399881	624	0.0201899	FALSE	0.964597
1937	High	Master Protein	Q9NXS2	Glutaminyl-peptide cyclotransferase-like protein OS=Homo sapiens GN=QPCTL PE=1 SV=2	7.06806	2	3	2	1	382	High	High	1.015	0.02	162759	160354	0	4.87	2	0.02	-0.0520011	-0.253654	0.399881	625	0.0201822	FALSE	0.964597
1938	High	Master Protein	O00142	Thymidine kinase 2, mitochondrial OS=Homo sapiens GN=TK2 PE=1 SV=4	4.15094	2	3	2	1	265	High	High	1.015	0.02	243277	239581	0	7.18	2	0.02	-0.0520011	-0.253654	0.399881	626	0.0201745	FALSE	0.964597
1939	High	Master Protein	P05067	Amyloid beta A4 protein OS=Homo sapiens GN=APP PE=1 SV=3	13.6364	10	15	10	1	770	High	High	1.014	0.02	629469	620640	0	31.93	10	0.02	-0.0520011	-0.253654	0.399881	627	0.0201668	FALSE	0.964597
1940	High	Master Protein	Q9NTK5	Obg-like ATPase 1 OS=Homo sapiens GN=OLA1 PE=1 SV=2	26.5152	10	18	10	1	396	High	High	1.014	0.02	4.57254e+06	4.5096e+06	0	38.78	10	0.02	-0.0520011	-0.253654	0.399881	628	0.020159	FALSE	0.964597
1941	High	Master Protein	Q6IAN0	Dehydrogenase/reductase SDR family member 7B OS=Homo sapiens GN=DHRS7B PE=1 SV=2	27.0769	8	13	8	1	325	High	High	1.014	0.02	1.26488e+06	1.24719e+06	0	35.48	8	0.02	-0.0520011	-0.253654	0.399881	629	0.0201513	FALSE	0.964597
1942	High	Master Protein	O96005	Cleft lip and palate transmembrane protein 1 OS=Homo sapiens GN=CLPTM1 PE=1 SV=1	10.3139	7	13	7	1	669	High	High	1.014	0.02	592372	584297	0	23.67	7	0.02	-0.0520011	-0.253654	0.399881	630	0.0201436	FALSE	0.964597
1943	High	Master Protein	Q6PML9	Zinc transporter 9 OS=Homo sapiens GN=SLC30A9 PE=1 SV=1	11.0915	5	7	5	1	568	High	High	1.014	0.02	359359	354443	0	15.58	5	0.02	-0.0520011	-0.253654	0.399881	631	0.0201359	FALSE	0.964597
1944	High	Master Protein	Q96RQ1	Endoplasmic reticulum-Golgi intermediate compartment protein 2 OS=Homo sapiens GN=ERGIC2 PE=1 SV=2	5.30504	2	3	2	1	377	High	High	1.014	0.02	247975	244639	0	6.21	2	0.02	-0.0520011	-0.253654	0.399881	632	0.0201282	FALSE	0.964597
1945	High	Master Protein	Q01973	Inactive tyrosine-protein kinase transmembrane receptor ROR1 OS=Homo sapiens GN=ROR1 PE=1 SV=2	2.45464	2	2	2	1	937	High	High	1.014	0.02	54580	53821.6	0	5.57	2	0.02	-0.0520011	-0.253654	0.399881	633	0.0201204	FALSE	0.964597
1946	High	Master Protein	P21333	Filamin-A OS=Homo sapiens GN=FLNA PE=1 SV=4	38.9875	92	211	77	1	2647	High	High	1.013	0.02	2.59356e+07	2.5601e+07	3	506.94	92	0.02	-0.0520011	-0.253654	0.399881	634	0.0201127	FALSE	0.964597
1947	High	Master Protein	P30520	Adenylosuccinate synthetase isozyme 2 OS=Homo sapiens GN=ADSS PE=1 SV=3	31.7982	11	21	11	1	456	High	High	1.013	0.02	1.42741e+06	1.40884e+06	0	33.34	11	0.02	-0.0520011	-0.253654	0.399881	635	0.020105	FALSE	0.964597
1948	High	Master Protein	P19838	Nuclear factor NF-kappa-B p105 subunit OS=Homo sapiens GN=NFKB1 PE=1 SV=2	7.54132	6	8	6	1	968	High	High	1.013	0.02	806050	795721	0	20.3	6	0.02	-0.0520011	-0.253654	0.399881	636	0.0200973	FALSE	0.964597
1949	High	Master Protein	O00443	Phosphatidylinositol 4-phosphate 3-kinase C2 domain-containing subunit alpha OS=Homo sapiens GN=PIK3C2A PE=1 SV=2	4.09253	6	6	6	1	1686	High	High	1.013	0.02	196501	194026	0	12.07	6	0.02	-0.0520011	-0.253654	0.399881	637	0.0200896	FALSE	0.964597
1950	High	Master Protein	Q9UKM7	Endoplasmic reticulum mannosyl-oligosaccharide 1,2-alpha-mannosidase OS=Homo sapiens GN=MAN1B1 PE=1 SV=2	8.86981	6	6	6	1	699	High	High	1.013	0.02	402606	397409	0	6.46	6	0.02	-0.0520011	-0.253654	0.399881	638	0.0200818	FALSE	0.964597
1951	High	Master Protein	Q96DA6	Mitochondrial import inner membrane translocase subunit TIM14 OS=Homo sapiens GN=DNAJC19 PE=1 SV=3	36.2069	4	5	4	1	116	High	High	1.013	0.02	889872	878564	0	14.22	4	0.02	-0.0520011	-0.253654	0.399881	639	0.0200741	FALSE	0.964597
1952	High	Master Protein	Q6NZI2	Caveolae-associated protein 1 OS=Homo sapiens GN=CAVIN1 PE=1 SV=1	33.3333	14	34	14	1	390	High	High	1.012	0.02	4.62599e+06	4.5706e+06	0	72.53	14	0.02	-0.0520011	-0.253654	0.399881	640	0.0200664	FALSE	0.964597
1953	High	Master Protein	Q8WTT2	Nucleolar complex protein 3 homolog OS=Homo sapiens GN=NOC3L PE=1 SV=1	7.375	5	6	5	1	800	High	High	1.012	0.02	234603	231924	0	2.62	5	0.02	-0.0520011	-0.253654	0.399881	641	0.0200587	FALSE	0.964597
1954	High	Master Protein	Q9NX62	Inositol monophosphatase 3 OS=Homo sapiens GN=IMPAD1 PE=1 SV=1	15.3203	4	4	4	1	359	High	High	1.012	0.02	313172	309470	0	12.1	4	0.02	-0.0520011	-0.253654	0.399881	642	0.020051	FALSE	0.964597
1955	High	Master Protein	Q9UHX1	Poly(U)-binding-splicing factor PUF60 OS=Homo sapiens GN=PUF60 PE=1 SV=1	8.22898	4	4	4	1	559	High	High	1.012	0.02	577272	570457	0	9.5	4	0.02	-0.0520011	-0.253654	0.399881	643	0.0200432	FALSE	0.964597
1956	High	Master Protein	P23786	Carnitine O-palmitoyltransferase 2, mitochondrial OS=Homo sapiens GN=CPT2 PE=1 SV=2	5.6231	4	5	4	1	658	High	High	1.012	0.02	392051	387451	0	6.32	4	0.02	-0.0520011	-0.253654	0.399881	644	0.0200355	FALSE	0.964597
1957	High	Master Protein	Q12913	Receptor-type tyrosine-protein phosphatase eta OS=Homo sapiens GN=PTPRJ PE=1 SV=3	3.59013	3	4	3	1	1337	High	High	1.012	0.02	105620	104320	0	5.66	3	0.02	-0.0520011	-0.253654	0.399881	645	0.0200278	FALSE	0.964597
1958	High	Master Protein	Q12792	Twinfilin-1 OS=Homo sapiens GN=TWF1 PE=1 SV=3	8	3	3	3	1	350	High	High	1.012	0.02	55310.7	54663.7	0	2.56	3	0.02	-0.0520011	-0.253654	0.399881	646	0.0200201	FALSE	0.964597
1959	High	Master Protein	P55809	Succinyl-CoA:3-ketoacid coenzyme A transferase 1, mitochondrial OS=Homo sapiens GN=OXCT1 PE=1 SV=1	8.07692	3	3	3	1	520	High	High	1.012	0.02	197993	195717	0	4.52	3	0.02	-0.0520011	-0.253654	0.399881	647	0.0200124	FALSE	0.964597
1960	High	Master Protein	Q8IWB1	Inositol 1,4,5-trisphosphate receptor-interacting protein OS=Homo sapiens GN=ITPRIP PE=1 SV=1	4.20475	2	3	2	1	547	High	High	1.012	0.02	63133.3	62369.7	0	5.29	2	0.02	-0.0520011	-0.253654	0.399881	648	0.0200046	FALSE	0.964597
1961	High	Master Protein	Q9BX68	Histidine triad nucleotide-binding protein 2, mitochondrial OS=Homo sapiens GN=HINT2 PE=1 SV=1	21.4724	2	4	2	1	163	High	High	1.012	0.02	224978	222212	0	6	2	0.02	-0.0520011	-0.253654	0.399881	649	0.0199969	FALSE	0.964597
1962	High	Master Protein	P30260	Cell division cycle protein 27 homolog OS=Homo sapiens GN=CDC27 PE=1 SV=2	2.18447	2	2	2	1	824	High	High	1.012	0.02	134436	132901	0	1.89	2	0.02	-0.0520011	-0.253654	0.399881	650	0.0199892	FALSE	0.964597
1963	High	Master Protein	P63092	Guanine nucleotide-binding protein G(s) subunit alpha isoforms short OS=Homo sapiens GN=GNAS PE=1 SV=1	44.9239	15	39	14	1	394	High	High	1.011	0.02	3.31284e+06	3.277e+06	0	89.26	15	0.02	-0.0520011	-0.253654	0.399881	651	0.0199815	FALSE	0.964597
1964	High	Master Protein	Q9P0L0	Vesicle-associated membrane protein-associated protein A OS=Homo sapiens GN=VAPA PE=1 SV=3	37.3494	9	27	8	1	249	High	High	1.011	0.02	4.90373e+06	4.85215e+06	0	69.61	9	0.02	-0.0520011	-0.253654	0.399881	652	0.0199737	FALSE	0.964597
1965	High	Master Protein	P62879	Guanine nucleotide-binding protein G(I)/G(S)/G(T) subunit beta-2 OS=Homo sapiens GN=GNB2 PE=1 SV=3	39.7059	10	38	5	1	340	High	High	1.011	0.02	7.71316e+06	7.62671e+06	6	110.94	10	0.02	-0.0520011	-0.253654	0.399881	653	0.019966	FALSE	0.964597
1966	High	Master Protein	Q16740	ATP-dependent Clp protease proteolytic subunit, mitochondrial OS=Homo sapiens GN=CLPP PE=1 SV=1	22.7437	5	11	5	1	277	High	High	1.011	0.02	331381	327902	0	24.39	5	0.02	-0.0520011	-0.253654	0.399881	654	0.0199583	FALSE	0.964597
1967	High	Master Protein	P49773	Histidine triad nucleotide-binding protein 1 OS=Homo sapiens GN=HINT1 PE=1 SV=2	24.6032	4	9	4	1	126	High	High	1.011	0.02	3.17322e+06	3.13996e+06	0	19.85	4	0.02	-0.0520011	-0.253654	0.399881	655	0.0199506	FALSE	0.964597
1968	High	Master Protein	Q9H0B6	Kinesin light chain 2 OS=Homo sapiens GN=KLC2 PE=1 SV=1	13.0225	7	16	4	1	622	High	High	1.011	0.02	204242	201949	0	30.2	7	0.02	-0.0520011	-0.253654	0.399881	656	0.0199429	FALSE	0.964597
1969	High	Master Protein	Q92597	Protein NDRG1 OS=Homo sapiens GN=NDRG1 PE=1 SV=1	12.6904	3	7	3	1	394	High	High	1.011	0.02	592670	586499	0	17.31	3	0.02	-0.0520011	-0.253654	0.399881	657	0.0199351	FALSE	0.964597
1970	High	Master Protein	Q9BYD1	39S ribosomal protein L13, mitochondrial OS=Homo sapiens GN=MRPL13 PE=1 SV=1	19.6629	3	4	3	1	178	High	High	1.011	0.02	330785	327247	0	9.23	3	0.02	-0.0520011	-0.253654	0.399881	658	0.0199274	FALSE	0.964597
1971	High	Master Protein	Q96HY6	DDRGK domain-containing protein 1 OS=Homo sapiens GN=DDRGK1 PE=1 SV=2	14.6497	3	12	3	1	314	High	High	1.011	0.02	191440	189436	0	17.29	3	0.02	-0.0520011	-0.253654	0.399881	659	0.0199197	FALSE	0.964597
1972	High	Master Protein	Q5J8M3	ER membrane protein complex subunit 4 OS=Homo sapiens GN=EMC4 PE=1 SV=2	17.4863	3	5	3	1	183	High	High	1.011	0.02	207023	204717	0	7.97	3	0.02	-0.0520011	-0.253654	0.399881	660	0.019912	FALSE	0.964597
1973	High	Master Protein	Q9P0S9	Transmembrane protein 14C OS=Homo sapiens GN=TMEM14C PE=1 SV=1	32.1429	2	8	2	1	112	High	High	1.011	0.02	622175	615159	0	24.5	2	0.02	-0.0520011	-0.253654	0.399881	661	0.0199043	FALSE	0.964597
1974	High	Master Protein	Q3LXA3	Triokinase/FMN cyclase OS=Homo sapiens GN=TKFC PE=1 SV=2	5.04348	2	2	2	1	575	High	High	1.011	0.02	31373.1	31025.8	0	2.5	2	0.02	-0.0520011	-0.253654	0.399881	662	0.0198965	FALSE	0.964597
1975	High	Master Protein	Q96D15	Reticulocalbin-3 OS=Homo sapiens GN=RCN3 PE=1 SV=1	9.14634	2	2	2	1	328	High	High	1.011	0.02	37055	36660.4	0	0	2	0.02	-0.0520011	-0.253654	0.399881	663	0.0198888	FALSE	0.964597
1976	High	Master Protein	Q9NP97	Dynein light chain roadblock-type 1 OS=Homo sapiens GN=DYNLRB1 PE=1 SV=3	29.1667	2	2	2	1	96	High	High	1.011	0.02	175762	173921	0	5.53	2	0.02	-0.0520011	-0.253654	0.399881	664	0.0198811	FALSE	0.964597
1977	High	Master Protein	Q9Y584	Mitochondrial import inner membrane translocase subunit Tim22 OS=Homo sapiens GN=TIMM22 PE=1 SV=2	11.8557	2	2	2	1	194	High	High	1.011	0.02	332148	328528	0	3.07	2	0.02	-0.0520011	-0.253654	0.399881	665	0.0198734	FALSE	0.964597
1821	High	Master Protein	O75369	Filamin-B OS=Homo sapiens GN=FLNB PE=1 SV=2	38.5088	93	202	77	1	2602	High	High	1.025	0.03	3.72236e+07	3.63317e+07	17	526.54	93	0.03	-0.0420011	-0.206669	0.418134	466	0.0214098	FALSE	0.971307
1822	High	Master Protein	Q01082	Spectrin beta chain, non-erythrocytic 1 OS=Homo sapiens GN=SPTBN1 PE=1 SV=2	25.1269	54	80	47	1	2364	High	High	1.025	0.03	8.71335e+06	8.50457e+06	5	145.35	54	0.03	-0.0420011	-0.206669	0.418134	467	0.0214021	FALSE	0.971307
1835	High	Master Protein	P37837	Transaldolase OS=Homo sapiens GN=TALDO1 PE=1 SV=2	42.73	17	38	17	1	337	High	High	1.024	0.03	6.3146e+06	6.16513e+06	0	86.77	17	0.03	-0.0420011	-0.206669	0.418134	468	0.0213944	FALSE	0.971307
1836	High	Master Protein	O00154	Cytosolic acyl coenzyme A thioester hydrolase OS=Homo sapiens GN=ACOT7 PE=1 SV=3	33.6842	11	24	11	1	380	High	High	1.024	0.03	2.0128e+06	1.96535e+06	0	56.83	11	0.03	-0.0420011	-0.206669	0.418134	469	0.0213867	FALSE	0.971307
1837	High	Master Protein	Q9BVK6	Transmembrane emp24 domain-containing protein 9 OS=Homo sapiens GN=TMED9 PE=1 SV=2	45.5319	10	29	8	1	235	High	High	1.024	0.03	3.85371e+06	3.76226e+06	3	70.91	10	0.03	-0.0420011	-0.206669	0.418134	470	0.0213789	FALSE	0.971307
1838	High	Master Protein	Q5GLZ8	Probable E3 ubiquitin-protein ligase HERC4 OS=Homo sapiens GN=HERC4 PE=1 SV=1	7.94702	8	9	8	1	1057	High	High	1.024	0.03	433568	423600	0	20.16	8	0.03	-0.0420011	-0.206669	0.418134	471	0.0213712	FALSE	0.971307
1839	High	Master Protein	P61204	ADP-ribosylation factor 3 OS=Homo sapiens GN=ARF3 PE=1 SV=2	53.0387	9	46	6	1	181	High	High	1.024	0.03	1.24705e+07	1.21814e+07	4	159.54	9	0.03	-0.0420011	-0.206669	0.418134	472	0.0213635	FALSE	0.971307
1840	High	Master Protein	Q96ND0	Protein FAM210A OS=Homo sapiens GN=FAM210A PE=1 SV=2	14.3382	4	7	4	1	272	High	High	1.024	0.03	606057	591977	0	4.6	4	0.03	-0.0420011	-0.206669	0.418134	473	0.0213558	FALSE	0.971307
1841	High	Master Protein	Q96DM3	Uncharacterized protein C18orf8 OS=Homo sapiens GN=C18orf8 PE=1 SV=2	5.47945	3	3	3	1	657	High	High	1.024	0.03	90258.1	88103	0	7.38	3	0.03	-0.0420011	-0.206669	0.418134	474	0.0213481	FALSE	0.971307
1842	High	Master Protein	Q9NQW7	Xaa-Pro aminopeptidase 1 OS=Homo sapiens GN=XPNPEP1 PE=1 SV=3	7.70465	3	3	3	1	623	High	High	1.024	0.03	153914	150379	0	7.91	3	0.03	-0.0420011	-0.206669	0.418134	475	0.0213403	FALSE	0.971307
1843	High	Master Protein	Q9Y3D9	28S ribosomal protein S23, mitochondrial OS=Homo sapiens GN=MRPS23 PE=1 SV=2	31.0526	5	7	5	1	190	High	High	1.023	0.03	295024	288297	0	11.12	5	0.03	-0.0420011	-0.206669	0.418134	476	0.0213326	FALSE	0.971307
1844	High	Master Protein	Q9HD42	Charged multivesicular body protein 1a OS=Homo sapiens GN=CHMP1A PE=1 SV=1	19.898	5	5	5	1	196	High	High	1.023	0.03	957035	935818	0	8.47	5	0.03	-0.0420011	-0.206669	0.418134	477	0.0213249	FALSE	0.971307
1845	High	Master Protein	P08648	Integrin alpha-5 OS=Homo sapiens GN=ITGA5 PE=1 SV=2	4.19447	4	5	4	1	1049	High	High	1.023	0.03	448680	438632	0	13.92	4	0.03	-0.0420011	-0.206669	0.418134	478	0.0213172	FALSE	0.971307
1846	High	Master Protein	Q7L523	Ras-related GTP-binding protein A OS=Homo sapiens GN=RRAGA PE=1 SV=1	9.26518	3	5	3	1	313	High	High	1.023	0.03	1.17988e+06	1.15369e+06	0	13.17	3	0.03	-0.0420011	-0.206669	0.418134	479	0.0213095	FALSE	0.971307
1847	High	Master Protein	Q9UPU5	Ubiquitin carboxyl-terminal hydrolase 24 OS=Homo sapiens GN=USP24 PE=1 SV=3	1.22137	3	3	3	1	2620	High	High	1.023	0.03	307065	300062	0	3.12	3	0.03	-0.0420011	-0.206669	0.418134	480	0.0213017	FALSE	0.971307
1848	High	Master Protein	O75312	Zinc finger protein ZPR1 OS=Homo sapiens GN=ZPR1 PE=1 SV=1	4.57516	2	3	2	1	459	High	High	1.023	0.03	158163	154536	0	7.08	2	0.03	-0.0420011	-0.206669	0.418134	481	0.021294	FALSE	0.971307
1849	High	Master Protein	Q9BQB6	Vitamin K epoxide reductase complex subunit 1 OS=Homo sapiens GN=VKORC1 PE=1 SV=1	12.8834	2	4	2	1	163	High	High	1.023	0.03	922382	901292	0	8.54	2	0.03	-0.0420011	-0.206669	0.418134	482	0.0212863	FALSE	0.971307
1850	High	Master Protein	P28838	Cytosol aminopeptidase OS=Homo sapiens GN=LAP3 PE=1 SV=3	41.6185	18	33	18	1	519	High	High	1.022	0.03	3.07788e+06	3.01036e+06	0	91.23	18	0.03	-0.0420011	-0.206669	0.418134	483	0.0212786	FALSE	0.971307
1851	High	Master Protein	Q96CV9	Optineurin OS=Homo sapiens GN=OPTN PE=1 SV=2	22.7036	13	18	12	1	577	High	High	1.022	0.03	1.68873e+06	1.65209e+06	0	30.46	13	0.03	-0.0420011	-0.206669	0.418134	484	0.0212708	FALSE	0.971307
1852	High	Master Protein	Q9UNW1	Multiple inositol polyphosphate phosphatase 1 OS=Homo sapiens GN=MINPP1 PE=1 SV=1	11.7043	5	6	5	1	487	High	High	1.022	0.03	543180	531563	0	11.87	5	0.03	-0.0420011	-0.206669	0.418134	485	0.0212631	FALSE	0.971307
1853	High	Master Protein	Q9BT09	Protein canopy homolog 3 OS=Homo sapiens GN=CNPY3 PE=1 SV=1	18.705	5	9	5	1	278	High	High	1.022	0.03	391921	383649	0	22.03	5	0.03	-0.0420011	-0.206669	0.418134	486	0.0212554	FALSE	0.971307
1854	High	Master Protein	Q9BV10	Dol-P-Man:Man(7)GlcNAc(2)-PP-Dol alpha-1,6-mannosyltransferase OS=Homo sapiens GN=ALG12 PE=1 SV=1	4.91803	2	2	2	1	488	High	High	1.022	0.03	216874	212255	0	5.42	2	0.03	-0.0420011	-0.206669	0.418134	487	0.0212477	FALSE	0.971307
1855	High	Master Protein	P51571	Translocon-associated protein subunit delta OS=Homo sapiens GN=SSR4 PE=1 SV=1	13.8728	2	13	2	1	173	High	High	1.022	0.03	2.41949e+06	2.36698e+06	0	39	2	0.03	-0.0420011	-0.206669	0.418134	488	0.02124	FALSE	0.971307
1856	High	Master Protein	P25789	Proteasome subunit alpha type-4 OS=Homo sapiens GN=PSMA4 PE=1 SV=1	34.8659	12	17	12	1	261	High	High	1.021	0.03	2.27914e+06	2.23243e+06	0	30.1	12	0.03	-0.0420011	-0.206669	0.418134	489	0.0212322	FALSE	0.971307
1857	High	Master Protein	Q9UBS4	DnaJ homolog subfamily B member 11 OS=Homo sapiens GN=DNAJB11 PE=1 SV=1	33.2402	11	22	11	1	358	High	High	1.021	0.03	1.63943e+06	1.60504e+06	0	62.52	11	0.03	-0.0420011	-0.206669	0.418134	490	0.0212245	FALSE	0.971307
1858	High	Master Protein	Q14165	Malectin OS=Homo sapiens GN=MLEC PE=1 SV=1	31.1644	10	23	10	1	292	High	High	1.021	0.03	4.68388e+06	4.58589e+06	0	49.24	10	0.03	-0.0420011	-0.206669	0.418134	491	0.0212168	FALSE	0.971307
1859	High	Master Protein	Q6NUQ4	Transmembrane protein 214 OS=Homo sapiens GN=TMEM214 PE=1 SV=2	13.2075	9	10	9	1	689	High	High	1.021	0.03	1.59214e+06	1.55866e+06	0	22.93	9	0.03	-0.0420011	-0.206669	0.418134	492	0.0212091	FALSE	0.971307
1860	High	Master Protein	Q9H0V9	VIP36-like protein OS=Homo sapiens GN=LMAN2L PE=1 SV=1	27.8736	9	14	9	1	348	High	High	1.021	0.03	2.65156e+06	2.59814e+06	0	34.53	9	0.03	-0.0420011	-0.206669	0.418134	493	0.0212014	FALSE	0.971307
1861	High	Master Protein	Q96LD4	Tripartite motif-containing protein 47 OS=Homo sapiens GN=TRIM47 PE=1 SV=2	18.8088	9	13	9	1	638	High	High	1.021	0.03	445545	436392	0	31.05	9	0.03	-0.0420011	-0.206669	0.418134	494	0.0211936	FALSE	0.971307
1862	High	Master Protein	Q8TBC4	NEDD8-activating enzyme E1 catalytic subunit OS=Homo sapiens GN=UBA3 PE=1 SV=2	22.2462	7	9	7	1	463	High	High	1.021	0.03	290191	284283	0	20.77	7	0.03	-0.0420011	-0.206669	0.418134	495	0.0211859	FALSE	0.971307
1863	High	Master Protein	Q96DV4	39S ribosomal protein L38, mitochondrial OS=Homo sapiens GN=MRPL38 PE=1 SV=2	13.4211	5	5	5	1	380	High	High	1.021	0.03	208761	204408	0	11.45	5	0.03	-0.0420011	-0.206669	0.418134	496	0.0211782	FALSE	0.971307
1864	High	Master Protein	Q7L0Y3	Mitochondrial ribonuclease P protein 1 OS=Homo sapiens GN=TRMT10C PE=1 SV=2	12.6551	4	6	4	1	403	High	High	1.021	0.03	452485	442988	0	10.12	4	0.03	-0.0420011	-0.206669	0.418134	497	0.0211705	FALSE	0.971307
1865	High	Master Protein	O75054	Immunoglobulin superfamily member 3 OS=Homo sapiens GN=IGSF3 PE=2 SV=3	2.93132	3	3	3	1	1194	High	High	1.021	0.03	187722	183888	0	4.45	3	0.03	-0.0420011	-0.206669	0.418134	498	0.0211628	FALSE	0.971307
1866	High	Master Protein	Q9Y2Z9	Ubiquinone biosynthesis monooxygenase COQ6, mitochondrial OS=Homo sapiens GN=COQ6 PE=1 SV=2	4.05983	2	2	2	1	468	High	High	1.021	0.03	140388	137524	0	5.13	2	0.03	-0.0420011	-0.206669	0.418134	499	0.021155	FALSE	0.971307
1867	High	Master Protein	O15269	Serine palmitoyltransferase 1 OS=Homo sapiens GN=SPTLC1 PE=1 SV=1	21.9873	12	16	12	1	473	High	High	1.02	0.03	3.06948e+06	3.0099e+06	0	35.1	12	0.03	-0.0420011	-0.206669	0.418134	500	0.0211473	FALSE	0.971307
1868	High	Master Protein	P39656	Dolichyl-diphosphooligosaccharide--protein glycosyltransferase 48 kDa subunit OS=Homo sapiens GN=DDOST PE=1 SV=4	28.5088	12	37	12	1	456	High	High	1.02	0.03	1.08743e+07	1.06582e+07	0	88.27	12	0.03	-0.0420011	-0.206669	0.418134	501	0.0211396	FALSE	0.971307
1869	High	Master Protein	Q9UBX3	Mitochondrial dicarboxylate carrier OS=Homo sapiens GN=SLC25A10 PE=1 SV=2	39.0244	8	14	8	1	287	High	High	1.02	0.03	3.2329e+06	3.17082e+06	0	44.31	8	0.03	-0.0420011	-0.206669	0.418134	502	0.0211319	FALSE	0.971307
1870	High	Master Protein	Q8NC56	LEM domain-containing protein 2 OS=Homo sapiens GN=LEMD2 PE=1 SV=1	16.1034	7	12	7	1	503	High	High	1.02	0.03	1.86042e+06	1.82409e+06	0	31.09	7	0.03	-0.0420011	-0.206669	0.418134	503	0.0211242	FALSE	0.971307
1871	High	Master Protein	Q9NUP9	Protein lin-7 homolog C OS=Homo sapiens GN=LIN7C PE=1 SV=1	19.797	4	5	4	1	197	High	High	1.02	0.03	430532	421921	0	8.9	4	0.03	-0.0420011	-0.206669	0.418134	504	0.0211164	FALSE	0.971307
1872	High	Master Protein	P05165	Propionyl-CoA carboxylase alpha chain, mitochondrial OS=Homo sapiens GN=PCCA PE=1 SV=4	7.28022	3	3	3	1	728	High	High	1.02	0.03	90241.9	88488.7	0	3.15	3	0.03	-0.0420011	-0.206669	0.418134	505	0.0211087	FALSE	0.971307
1873	High	Master Protein	Q9H0U6	39S ribosomal protein L18, mitochondrial OS=Homo sapiens GN=MRPL18 PE=1 SV=1	10.5556	2	2	2	1	180	High	High	1.02	0.03	378729	371476	0	4.73	2	0.03	-0.0420011	-0.206669	0.418134	506	0.021101	FALSE	0.971307
1874	High	Master Protein	P42704	Leucine-rich PPR motif-containing protein, mitochondrial OS=Homo sapiens GN=LRPPRC PE=1 SV=3	46.9154	65	157	65	1	1394	High	High	1.019	0.03	2.86578e+07	2.81153e+07	0	376.79	65	0.03	-0.0420011	-0.206669	0.418134	507	0.0210933	FALSE	0.971307
1875	High	Master Protein	P55786	Puromycin-sensitive aminopeptidase OS=Homo sapiens GN=NPEPPS PE=1 SV=2	19.3689	15	25	15	1	919	High	High	1.019	0.03	3.9864e+06	3.91239e+06	0	52.28	15	0.03	-0.0420011	-0.206669	0.418134	508	0.0210855	FALSE	0.971307
1876	High	Master Protein	Q02809	Procollagen-lysine,2-oxoglutarate 5-dioxygenase 1 OS=Homo sapiens GN=PLOD1 PE=1 SV=2	26.5475	16	40	15	1	727	High	High	1.019	0.03	5.6392e+06	5.53462e+06	1	109	16	0.03	-0.0420011	-0.206669	0.418134	509	0.0210778	FALSE	0.971307
1877	High	Master Protein	P50995	Annexin A11 OS=Homo sapiens GN=ANXA11 PE=1 SV=1	28.9109	15	31	14	1	505	High	High	1.019	0.03	3.85003e+06	3.7785e+06	1	63.78	15	0.03	-0.0420011	-0.206669	0.418134	510	0.0210701	FALSE	0.971307
1878	High	Master Protein	P26599	Polypyrimidine tract-binding protein 1 OS=Homo sapiens GN=PTBP1 PE=1 SV=1	25.2354	9	19	6	1	531	High	High	1.019	0.03	3.69395e+06	3.62434e+06	3	57.53	9	0.03	-0.0420011	-0.206669	0.418134	511	0.0210624	FALSE	0.971307
1879	High	Master Protein	Q12899	Tripartite motif-containing protein 26 OS=Homo sapiens GN=TRIM26 PE=1 SV=1	7.97774	5	6	5	1	539	High	High	1.019	0.03	430362	422319	0	9.13	5	0.03	-0.0420011	-0.206669	0.418134	512	0.0210547	FALSE	0.971307
1880	High	Master Protein	Q9H1K1	Iron-sulfur cluster assembly enzyme ISCU, mitochondrial OS=Homo sapiens GN=ISCU PE=1 SV=2	14.3713	3	5	3	1	167	High	High	1.019	0.03	486477	477385	0	9.86	3	0.03	-0.0420011	-0.206669	0.418134	513	0.0210469	FALSE	0.971307
1881	High	Master Protein	Q92643	GPI-anchor transamidase OS=Homo sapiens GN=PIGK PE=1 SV=2	7.8481	3	5	3	1	395	High	High	1.019	0.03	907780	890624	0	9.8	3	0.03	-0.0420011	-0.206669	0.418134	514	0.0210392	FALSE	0.971307
1882	High	Master Protein	Q9UHD8	Septin-9 OS=Homo sapiens GN=SEPT9 PE=1 SV=2	17.5768	9	13	9	1	586	High	High	1.018	0.03	1.89871e+06	1.86432e+06	0	27.37	9	0.03	-0.0420011	-0.206669	0.418134	515	0.0210315	FALSE	0.971307
1883	High	Master Protein	O94973	AP-2 complex subunit alpha-2 OS=Homo sapiens GN=AP2A2 PE=1 SV=2	19.5953	16	20	7	1	939	High	High	1.018	0.03	569390	559455	0	49.31	16	0.03	-0.0420011	-0.206669	0.418134	516	0.0210238	FALSE	0.971307
1884	High	Master Protein	P19174	1-phosphatidylinositol 4,5-bisphosphate phosphodiesterase gamma-1 OS=Homo sapiens GN=PLCG1 PE=1 SV=1	6.20155	6	6	6	1	1290	High	High	1.018	0.03	490540	481934	0	7.32	6	0.03	-0.0420011	-0.206669	0.418134	517	0.0210161	FALSE	0.971307
1885	High	Master Protein	O43237	Cytoplasmic dynein 1 light intermediate chain 2 OS=Homo sapiens GN=DYNC1LI2 PE=1 SV=1	15.6504	7	8	6	1	492	High	High	1.018	0.03	1.04992e+06	1.03122e+06	0	20.26	7	0.03	-0.0420011	-0.206669	0.418134	518	0.0210083	FALSE	0.971307
1886	High	Master Protein	P82930	28S ribosomal protein S34, mitochondrial OS=Homo sapiens GN=MRPS34 PE=1 SV=2	21.1009	4	4	4	1	218	High	High	1.018	0.03	753325	740190	0	6.57	4	0.03	-0.0420011	-0.206669	0.418134	519	0.0210006	FALSE	0.971307
1887	High	Master Protein	P29692	Elongation factor 1-delta OS=Homo sapiens GN=EEF1D PE=1 SV=5	23.1317	8	13	4	1	281	High	High	1.018	0.03	5.79529e+06	5.69558e+06	4	25.66	8	0.03	-0.0420011	-0.206669	0.418134	520	0.0209929	FALSE	0.971307
1888	High	Master Protein	P29279	Connective tissue growth factor OS=Homo sapiens GN=CTGF PE=1 SV=2	7.73639	3	3	3	1	349	High	High	1.018	0.03	389703	382828	0	4.16	3	0.03	-0.0420011	-0.206669	0.418134	521	0.0209852	FALSE	0.971307
1889	High	Master Protein	Q93052	Lipoma-preferred partner OS=Homo sapiens GN=LPP PE=1 SV=1	7.51634	3	4	3	1	612	High	High	1.018	0.03	281119	276042	0	3.92	3	0.03	-0.0420011	-0.206669	0.418134	522	0.0209775	FALSE	0.971307
1890	High	Master Protein	L0R6Q1	SLC35A4 upstream open reading frame protein OS=Homo sapiens GN=SLC35A4 PE=3 SV=1	30.0971	2	2	2	1	103	High	High	1.018	0.03	1.01372e+06	995471	0	5.58	2	0.03	-0.0420011	-0.206669	0.418134	523	0.0209697	FALSE	0.971307
1891	High	Master Protein	Q9NVZ3	Adaptin ear-binding coat-associated protein 2 OS=Homo sapiens GN=NECAP2 PE=1 SV=1	9.5057	2	2	2	1	263	High	High	1.018	0.03	36444.4	35793.4	0	2.6	2	0.03	-0.0420011	-0.206669	0.418134	524	0.020962	FALSE	0.971307
1892	High	Master Protein	Q68EM7	Rho GTPase-activating protein 17 OS=Homo sapiens GN=ARHGAP17 PE=1 SV=1	3.74574	2	2	2	1	881	High	High	1.018	0.03	45406.5	44590.3	0	1.72	2	0.03	-0.0420011	-0.206669	0.418134	525	0.0209543	FALSE	0.971307
1780	High	Master Protein	Q15006	ER membrane protein complex subunit 2 OS=Homo sapiens GN=EMC2 PE=1 SV=1	21.2121	5	7	5	1	297	High	High	1.032	0.04	376677	365150	0	13.46	5	0.04	-0.0320011	-0.159683	0.436565	350	0.0223054	FALSE	0.978063
1781	High	Master Protein	P11234	Ras-related protein Ral-B OS=Homo sapiens GN=RALB PE=1 SV=1	30.5825	6	12	4	1	206	High	High	1.032	0.04	2.04815e+06	1.98526e+06	2	28.08	6	0.04	-0.0320011	-0.159683	0.436565	351	0.0222977	FALSE	0.978063
1784	High	Master Protein	P61970	Nuclear transport factor 2 OS=Homo sapiens GN=NUTF2 PE=1 SV=1	23.622	2	4	2	1	127	High	High	1.032	0.04	247007	239430	0	12.69	2	0.04	-0.0320011	-0.159683	0.436565	352	0.02229	FALSE	0.978063
1785	High	Master Protein	Q15149	Plectin OS=Homo sapiens GN=PLEC PE=1 SV=3	47.7797	225	498	217	1	4684	High	High	1.031	0.04	6.95007e+07	6.74267e+07	8	1195.39	225	0.04	-0.0320011	-0.159683	0.436565	353	0.0222823	FALSE	0.978063
1786	High	Master Protein	P50552	Vasodilator-stimulated phosphoprotein OS=Homo sapiens GN=VASP PE=1 SV=3	15	5	5	5	1	380	High	High	1.031	0.04	571773	554808	0	13.07	5	0.04	-0.0320011	-0.159683	0.436565	354	0.0222746	FALSE	0.978063
1787	High	Master Protein	Q9P291	Armadillo repeat-containing X-linked protein 1 OS=Homo sapiens GN=ARMCX1 PE=1 SV=1	13.9073	5	7	5	1	453	High	High	1.031	0.04	858983	833245	0	17.55	5	0.04	-0.0320011	-0.159683	0.436565	355	0.0222668	FALSE	0.978063
1788	High	Master Protein	E9PAV3	Nascent polypeptide-associated complex subunit alpha, muscle-specific form OS=Homo sapiens GN=NACA PE=1 SV=1	1.97305	3	5	3	1	2078	High	High	1.031	0.04	748577	726012	0	18.27	3	0.04	-0.0320011	-0.159683	0.436565	356	0.0222591	FALSE	0.978063
1789	High	Master Protein	P10114	Ras-related protein Rap-2a OS=Homo sapiens GN=RAP2A PE=1 SV=1	21.3115	3	5	2	1	183	High	High	1.031	0.04	228603	221711	0	13.93	3	0.04	-0.0320011	-0.159683	0.436565	357	0.0222514	FALSE	0.978063
1790	High	Master Protein	P19784	Casein kinase II subunit alpha' OS=Homo sapiens GN=CSNK2A2 PE=1 SV=1	6.57143	2	2	2	1	350	High	High	1.031	0.04	171374	166194	0	3.72	2	0.04	-0.0320011	-0.159683	0.436565	358	0.0222437	FALSE	0.978063
1791	High	Master Protein	Q6P1N0	Coiled-coil and C2 domain-containing protein 1A OS=Homo sapiens GN=CC2D1A PE=1 SV=1	6.72976	6	7	6	1	951	High	High	1.03	0.04	416729	404776	0	7.21	6	0.04	-0.0320011	-0.159683	0.436565	359	0.0222359	FALSE	0.978063
1792	High	Master Protein	P51398	28S ribosomal protein S29, mitochondrial OS=Homo sapiens GN=DAP3 PE=1 SV=1	15.8291	6	9	6	1	398	High	High	1.03	0.04	847200	822653	0	22.53	6	0.04	-0.0320011	-0.159683	0.436565	360	0.0222282	FALSE	0.978063
1793	High	Master Protein	Q8IY21	Probable ATP-dependent RNA helicase DDX60 OS=Homo sapiens GN=DDX60 PE=1 SV=3	2.27804	3	3	3	1	1712	High	High	1.03	0.04	257109	249700	0	9.76	3	0.04	-0.0320011	-0.159683	0.436565	361	0.0222205	FALSE	0.978063
1794	High	Master Protein	Q9NTJ5	Phosphatidylinositide phosphatase SAC1 OS=Homo sapiens GN=SACM1L PE=1 SV=2	19.9319	12	23	12	1	587	High	High	1.029	0.04	3.77823e+06	3.67209e+06	0	43.24	12	0.04	-0.0320011	-0.159683	0.436565	362	0.0222128	FALSE	0.978063
1795	High	Master Protein	P09382	Galectin-1 OS=Homo sapiens GN=LGALS1 PE=1 SV=2	82.2222	11	51	11	1	135	High	High	1.029	0.04	1.75556e+07	1.70578e+07	0	139.44	11	0.04	-0.0320011	-0.159683	0.436565	363	0.0222051	FALSE	0.978063
1796	High	Master Protein	Q92552	28S ribosomal protein S27, mitochondrial OS=Homo sapiens GN=MRPS27 PE=1 SV=3	23.1884	8	14	8	1	414	High	High	1.029	0.04	1.22082e+06	1.18691e+06	0	21.48	8	0.04	-0.0320011	-0.159683	0.436565	364	0.0221973	FALSE	0.978063
1797	High	Master Protein	Q92665	28S ribosomal protein S31, mitochondrial OS=Homo sapiens GN=MRPS31 PE=1 SV=3	17.9747	7	7	7	1	395	High	High	1.029	0.04	710078	690181	0	12.18	7	0.04	-0.0320011	-0.159683	0.436565	365	0.0221896	FALSE	0.978063
1798	High	Master Protein	Q9BXW7	Haloacid dehalogenase-like hydrolase domain-containing 5 OS=Homo sapiens GN=HDHD5 PE=1 SV=1	17.4941	5	11	5	1	423	High	High	1.029	0.04	978296	950381	0	31.5	5	0.04	-0.0320011	-0.159683	0.436565	366	0.0221819	FALSE	0.978063
1799	High	Master Protein	Q14118	Dystroglycan OS=Homo sapiens GN=DAG1 PE=1 SV=2	3.68715	3	3	3	1	895	High	High	1.029	0.04	291490	283178	0	5.37	3	0.04	-0.0320011	-0.159683	0.436565	367	0.0221742	FALSE	0.978063
1800	High	Master Protein	Q9UPN3	Microtubule-actin cross-linking factor 1, isoforms 1/2/3/5 OS=Homo sapiens GN=MACF1 PE=1 SV=4	4.62913	27	35	24	1	7388	High	High	1.028	0.04	921846	896813	2	58.9	27	0.04	-0.0320011	-0.159683	0.436565	368	0.0221665	FALSE	0.978063
1801	High	Master Protein	Q53H12	Acylglycerol kinase, mitochondrial OS=Homo sapiens GN=AGK PE=1 SV=2	31.7536	16	30	16	1	422	High	High	1.028	0.04	8.32458e+06	8.09777e+06	0	75.35	16	0.04	-0.0320011	-0.159683	0.436565	369	0.0221587	FALSE	0.978063
1802	High	Master Protein	Q53GQ0	Very-long-chain 3-oxoacyl-CoA reductase OS=Homo sapiens GN=HSD17B12 PE=1 SV=2	45.5128	14	32	14	1	312	High	High	1.028	0.04	6.04387e+06	5.87691e+06	0	98.83	14	0.04	-0.0320011	-0.159683	0.436565	370	0.022151	FALSE	0.978063
1803	High	Master Protein	P57105	Synaptojanin-2-binding protein OS=Homo sapiens GN=SYNJ2BP PE=1 SV=2	23.4483	4	5	4	1	145	High	High	1.028	0.04	498139	484538	0	12.94	4	0.04	-0.0320011	-0.159683	0.436565	371	0.0221433	FALSE	0.978063
1804	High	Master Protein	P63000	Ras-related C3 botulinum toxin substrate 1 OS=Homo sapiens GN=RAC1 PE=1 SV=1	41.1458	8	31	3	1	192	High	High	1.028	0.04	2.34593e+06	2.28206e+06	0	76.31	8	0.04	-0.0320011	-0.159683	0.436565	372	0.0221356	FALSE	0.978063
1805	High	Master Protein	P09001	39S ribosomal protein L3, mitochondrial OS=Homo sapiens GN=MRPL3 PE=1 SV=1	8.90805	3	3	3	1	348	High	High	1.028	0.04	655695	637873	0	7.23	3	0.04	-0.0320011	-0.159683	0.436565	373	0.0221279	FALSE	0.978063
1806	High	Master Protein	Q7Z569	BRCA1-associated protein OS=Homo sapiens GN=BRAP PE=1 SV=2	3.71622	2	2	2	1	592	High	High	1.028	0.04	131834	128282	0	3.21	2	0.04	-0.0320011	-0.159683	0.436565	374	0.0221201	FALSE	0.978063
1807	High	Master Protein	Q9Y4F1	FERM, RhoGEF and pleckstrin domain-containing protein 1 OS=Homo sapiens GN=FARP1 PE=1 SV=1	2.77512	2	2	2	1	1045	High	High	1.028	0.04	36719.1	35714	0	0	2	0.04	-0.0320011	-0.159683	0.436565	375	0.0221124	FALSE	0.978063
1808	High	Master Protein	P49189	4-trimethylaminobutyraldehyde dehydrogenase OS=Homo sapiens GN=ALDH9A1 PE=1 SV=3	39.4737	19	43	19	1	494	High	High	1.027	0.04	6.29955e+06	6.1317e+06	0	103.84	19	0.04	-0.0320011	-0.159683	0.436565	376	0.0221047	FALSE	0.978063
1809	High	Master Protein	Q92544	Transmembrane 9 superfamily member 4 OS=Homo sapiens GN=TM9SF4 PE=1 SV=2	16.3551	11	20	11	1	642	High	High	1.027	0.04	2.90774e+06	2.83215e+06	0	40.51	11	0.04	-0.0320011	-0.159683	0.436565	377	0.022097	FALSE	0.978063
1810	High	Master Protein	Q8WVX9	Fatty acyl-CoA reductase 1 OS=Homo sapiens GN=FAR1 PE=1 SV=1	21.9417	9	12	9	1	515	High	High	1.027	0.04	1.70035e+06	1.65546e+06	0	30.23	9	0.04	-0.0320011	-0.159683	0.436565	378	0.0220893	FALSE	0.978063
1811	High	Master Protein	Q9H223	EH domain-containing protein 4 OS=Homo sapiens GN=EHD4 PE=1 SV=1	24.2144	12	22	9	1	541	High	High	1.027	0.04	701455	682962	0	34.11	12	0.04	-0.0320011	-0.159683	0.436565	379	0.0220815	FALSE	0.978063
1812	High	Master Protein	Q9UHQ9	NADH-cytochrome b5 reductase 1 OS=Homo sapiens GN=CYB5R1 PE=1 SV=1	36.7213	9	14	9	1	305	High	High	1.027	0.04	4.72623e+06	4.60293e+06	0	39.54	9	0.04	-0.0320011	-0.159683	0.436565	380	0.0220738	FALSE	0.978063
1813	High	Master Protein	P08133	Annexin A6 OS=Homo sapiens GN=ANXA6 PE=1 SV=3	53.9376	44	106	44	1	673	High	High	1.026	0.04	2.22844e+07	2.17236e+07	0	226.58	44	0.04	-0.0320011	-0.159683	0.436565	381	0.0220661	FALSE	0.978063
1814	High	Master Protein	Q14203	Dynactin subunit 1 OS=Homo sapiens GN=DCTN1 PE=1 SV=3	13.5368	17	23	16	1	1278	High	High	1.026	0.04	1.82456e+06	1.77749e+06	1	41.65	17	0.04	-0.0320011	-0.159683	0.436565	382	0.0220584	FALSE	0.978063
1815	High	Master Protein	P35270	Sepiapterin reductase OS=Homo sapiens GN=SPR PE=1 SV=1	38.3142	8	13	8	1	261	High	High	1.026	0.04	960976	936516	0	33.96	8	0.04	-0.0320011	-0.159683	0.436565	383	0.0220506	FALSE	0.978063
1816	High	Master Protein	O95219	Sorting nexin-4 OS=Homo sapiens GN=SNX4 PE=1 SV=1	14.2222	6	6	6	1	450	High	High	1.026	0.04	498785	486162	0	9.71	6	0.04	-0.0320011	-0.159683	0.436565	384	0.0220429	FALSE	0.978063
1817	High	Master Protein	Q9H330	Transmembrane protein 245 OS=Homo sapiens GN=TMEM245 PE=1 SV=2	4.50055	4	6	4	1	911	High	High	1.026	0.04	1.20539e+06	1.17493e+06	0	13.69	4	0.04	-0.0320011	-0.159683	0.436565	385	0.0220352	FALSE	0.978063
1818	High	Master Protein	O95470	Sphingosine-1-phosphate lyase 1 OS=Homo sapiens GN=SGPL1 PE=1 SV=3	5.10563	4	5	4	1	568	High	High	1.026	0.04	166601	162333	0	4.24	4	0.04	-0.0320011	-0.159683	0.436565	386	0.0220275	FALSE	0.978063
1819	High	Master Protein	Q99436	Proteasome subunit beta type-7 OS=Homo sapiens GN=PSMB7 PE=1 SV=1	11.9134	4	6	4	1	277	High	High	1.026	0.04	555030	540984	0	11.37	4	0.04	-0.0320011	-0.159683	0.436565	387	0.0220198	FALSE	0.978063
1820	High	Master Protein	P18433	Receptor-type tyrosine-protein phosphatase alpha OS=Homo sapiens GN=PTPRA PE=1 SV=2	5.23691	4	4	3	1	802	High	High	1.026	0.04	210535	205223	0	8.99	4	0.04	-0.0320011	-0.159683	0.436565	388	0.022012	FALSE	0.978063
1823	High	Master Protein	Q9HBH5	Retinol dehydrogenase 14 OS=Homo sapiens GN=RDH14 PE=1 SV=1	34.2262	10	13	10	1	336	High	High	1.025	0.04	600267	585574	0	12.76	10	0.04	-0.0320011	-0.159683	0.436565	389	0.0220043	FALSE	0.978063
1824	High	Master Protein	Q9H9J2	39S ribosomal protein L44, mitochondrial OS=Homo sapiens GN=MRPL44 PE=1 SV=1	30.7229	10	21	10	1	332	High	High	1.025	0.04	3.7936e+06	3.70255e+06	0	61.83	10	0.04	-0.0320011	-0.159683	0.436565	390	0.0219966	FALSE	0.978063
1825	High	Master Protein	O95479	GDH/6PGL endoplasmic bifunctional protein OS=Homo sapiens GN=H6PD PE=1 SV=2	10.8723	9	14	9	1	791	High	High	1.025	0.04	1.08255e+06	1.05587e+06	0	24.85	9	0.04	-0.0320011	-0.159683	0.436565	391	0.0219889	FALSE	0.978063
1826	High	Master Protein	O14818	Proteasome subunit alpha type-7 OS=Homo sapiens GN=PSMA7 PE=1 SV=1	31.4516	9	23	9	1	248	High	High	1.025	0.04	1.74853e+06	1.70585e+06	0	58.17	9	0.04	-0.0320011	-0.159683	0.436565	392	0.0219812	FALSE	0.978063
1827	High	Master Protein	O95870	Protein ABHD16A OS=Homo sapiens GN=ABHD16A PE=1 SV=3	16.4875	8	9	8	1	558	High	High	1.025	0.04	1.25216e+06	1.22209e+06	0	15.63	8	0.04	-0.0320011	-0.159683	0.436565	393	0.0219734	FALSE	0.978063
1828	High	Master Protein	O76031	ATP-dependent Clp protease ATP-binding subunit clpX-like, mitochondrial OS=Homo sapiens GN=CLPX PE=1 SV=2	12.0063	6	9	6	1	633	High	High	1.025	0.04	791967	772946	0	23.39	6	0.04	-0.0320011	-0.159683	0.436565	394	0.0219657	FALSE	0.978063
1829	High	Master Protein	Q5ZPR3	CD276 antigen OS=Homo sapiens GN=CD276 PE=1 SV=1	15.9176	4	5	4	1	534	High	High	1.025	0.04	3358.37	3277.03	0	8.78	4	0.04	-0.0320011	-0.159683	0.436565	395	0.021958	FALSE	0.978063
1830	High	Master Protein	Q9UJX2	Cell division cycle protein 23 homolog OS=Homo sapiens GN=CDC23 PE=1 SV=3	3.51759	2	2	2	1	597	High	High	1.025	0.04	239624	233869	0	2.6	2	0.04	-0.0320011	-0.159683	0.436565	396	0.0219503	FALSE	0.978063
1831	High	Master Protein	P20273	B-cell receptor CD22 OS=Homo sapiens GN=CD22 PE=1 SV=2	2.36128	2	3	2	1	847	High	High	1.025	0.04	350175	341735	0	4.26	2	0.04	-0.0320011	-0.159683	0.436565	397	0.0219426	FALSE	0.978063
1832	High	Master Protein	Q9NQX7	Integral membrane protein 2C OS=Homo sapiens GN=ITM2C PE=1 SV=1	11.985	2	4	2	1	267	High	High	1.025	0.04	116045	113220	0	9.51	2	0.04	-0.0320011	-0.159683	0.436565	398	0.0219348	FALSE	0.978063
1833	High	Master Protein	O96019	Actin-like protein 6A OS=Homo sapiens GN=ACTL6A PE=1 SV=1	5.59441	2	3	2	1	429	High	High	1.025	0.04	109714	107045	0	2.98	2	0.04	-0.0320011	-0.159683	0.436565	399	0.0219271	FALSE	0.978063
1834	High	Master Protein	Q92572	AP-3 complex subunit sigma-1 OS=Homo sapiens GN=AP3S1 PE=1 SV=1	16.0622	2	2	2	1	193	High	High	1.025	0.04	53007	51734.3	0	0	2	0.04	-0.0320011	-0.159683	0.436565	400	0.0219194	FALSE	0.978063
1732	High	Master Protein	P04406	Glyceraldehyde-3-phosphate dehydrogenase OS=Homo sapiens GN=GAPDH PE=1 SV=3	65.3731	20	110	20	1	335	High	High	1.038	0.05	5.60146e+07	5.3953e+07	0	357.99	20	0.05	-0.0220011	-0.112697	0.455135	237	0.0231779	FALSE	0.984866
1733	High	Master Protein	P42892	Endothelin-converting enzyme 1 OS=Homo sapiens GN=ECE1 PE=1 SV=2	19.6104	14	30	14	1	770	High	High	1.038	0.05	6.08783e+06	5.86505e+06	0	82.75	14	0.05	-0.0220011	-0.112697	0.455135	238	0.0231702	FALSE	0.984866
1734	High	Master Protein	Q969N2	GPI transamidase component PIG-T OS=Homo sapiens GN=PIGT PE=1 SV=1	18.5121	10	14	10	1	578	High	High	1.038	0.05	3.09461e+06	2.9825e+06	0	37.02	10	0.05	-0.0220011	-0.112697	0.455135	239	0.0231624	FALSE	0.984866
1735	High	Master Protein	Q9Y2Z4	Tyrosine--tRNA ligase, mitochondrial OS=Homo sapiens GN=YARS2 PE=1 SV=2	18.4486	10	13	10	1	477	High	High	1.038	0.05	1.15777e+06	1.11549e+06	0	24.62	10	0.05	-0.0220011	-0.112697	0.455135	240	0.0231547	FALSE	0.984866
1736	High	Master Protein	Q7Z2W4	Zinc finger CCCH-type antiviral protein 1 OS=Homo sapiens GN=ZC3HAV1 PE=1 SV=3	9.97783	8	10	8	1	902	High	High	1.038	0.05	1.85701e+06	1.78828e+06	0	16.24	8	0.05	-0.0220011	-0.112697	0.455135	241	0.023147	FALSE	0.984866
1737	High	Master Protein	Q9Y613	FH1/FH2 domain-containing protein 1 OS=Homo sapiens GN=FHOD1 PE=1 SV=3	5.24055	6	8	6	1	1164	High	High	1.038	0.05	348637	335744	0	12.76	6	0.05	-0.0220011	-0.112697	0.455135	242	0.0231393	FALSE	0.984866
1738	High	Master Protein	Q96ER9	Coiled-coil domain-containing protein 51 OS=Homo sapiens GN=CCDC51 PE=1 SV=2	11.4355	5	7	5	1	411	High	High	1.038	0.05	250500	241276	0	15.61	5	0.05	-0.0220011	-0.112697	0.455135	243	0.0231316	FALSE	0.984866
1739	High	Master Protein	P51159	Ras-related protein Rab-27A OS=Homo sapiens GN=RAB27A PE=1 SV=3	25.7919	6	13	5	1	221	High	High	1.038	0.05	1.58274e+06	1.5248e+06	1	22.23	6	0.05	-0.0220011	-0.112697	0.455135	244	0.0231238	FALSE	0.984866
1740	High	Master Protein	O95140	Mitofusin-2 OS=Homo sapiens GN=MFN2 PE=1 SV=3	8.45443	5	8	5	1	757	High	High	1.038	0.05	256681	247370	0	8.36	5	0.05	-0.0220011	-0.112697	0.455135	245	0.0231161	FALSE	0.984866
1741	High	Master Protein	Q5T160	Probable arginine--tRNA ligase, mitochondrial OS=Homo sapiens GN=RARS2 PE=1 SV=1	7.78547	4	4	4	1	578	High	High	1.038	0.05	204364	196910	0	8.05	4	0.05	-0.0220011	-0.112697	0.455135	246	0.0231084	FALSE	0.984866
1742	High	Master Protein	Q4KMQ2	Anoctamin-6 OS=Homo sapiens GN=ANO6 PE=1 SV=2	4.17582	3	3	3	1	910	High	High	1.038	0.05	289637	279033	0	7.3	3	0.05	-0.0220011	-0.112697	0.455135	247	0.0231007	FALSE	0.984866
1743	High	Master Protein	Q9NQG5	Regulation of nuclear pre-mRNA domain-containing protein 1B OS=Homo sapiens GN=RPRD1B PE=1 SV=1	12.5767	3	4	3	1	326	High	High	1.038	0.05	38675.4	37251.8	0	2.62	3	0.05	-0.0220011	-0.112697	0.455135	248	0.023093	FALSE	0.984866
1744	High	Master Protein	P24928	DNA-directed RNA polymerase II subunit RPB1 OS=Homo sapiens GN=POLR2A PE=1 SV=2	2.13198	3	3	3	1	1970	High	High	1.038	0.05	90854.4	87522.3	0	2.16	3	0.05	-0.0220011	-0.112697	0.455135	249	0.0230852	FALSE	0.984866
1745	High	Master Protein	Q9NXH8	Torsin-4A OS=Homo sapiens GN=TOR4A PE=1 SV=2	5.20095	2	2	2	1	423	High	High	1.038	0.05	157640	151840	0	2.39	2	0.05	-0.0220011	-0.112697	0.455135	250	0.0230775	FALSE	0.984866
1746	High	Master Protein	Q8IWB7	WD repeat and FYVE domain-containing protein 1 OS=Homo sapiens GN=WDFY1 PE=1 SV=1	4.39024	2	3	2	1	410	High	High	1.038	0.05	122778	118262	0	3.66	2	0.05	-0.0220011	-0.112697	0.455135	251	0.0230698	FALSE	0.984866
1747	High	Master Protein	P56962	Syntaxin-17 OS=Homo sapiens GN=STX17 PE=1 SV=2	11.2583	2	2	2	1	302	High	High	1.038	0.05	144373	139081	0	7.14	2	0.05	-0.0220011	-0.112697	0.455135	252	0.0230621	FALSE	0.984866
1748	High	Master Protein	O94905	Erlin-2 OS=Homo sapiens GN=ERLIN2 PE=1 SV=1	49.5575	18	32	14	1	339	High	High	1.037	0.05	6.90885e+06	6.66268e+06	4	74.63	18	0.05	-0.0220011	-0.112697	0.455135	253	0.0230544	FALSE	0.984866
1749	High	Master Protein	Q13488	V-type proton ATPase 116 kDa subunit a isoform 3 OS=Homo sapiens GN=TCIRG1 PE=1 SV=3	14.4578	10	12	9	1	830	High	High	1.037	0.05	1.22003e+06	1.17645e+06	0	30.37	10	0.05	-0.0220011	-0.112697	0.455135	254	0.0230466	FALSE	0.984866
1750	High	Master Protein	O15143	Actin-related protein 2/3 complex subunit 1B OS=Homo sapiens GN=ARPC1B PE=1 SV=3	19.086	6	9	6	1	372	High	High	1.037	0.05	892210	860600	0	28.09	6	0.05	-0.0220011	-0.112697	0.455135	255	0.0230389	FALSE	0.984866
1751	High	Master Protein	Q8TAD4	Zinc transporter 5 OS=Homo sapiens GN=SLC30A5 PE=1 SV=1	5.22876	4	6	4	1	765	High	High	1.037	0.05	576161	555842	0	14.56	4	0.05	-0.0220011	-0.112697	0.455135	256	0.0230312	FALSE	0.984866
1752	High	Master Protein	Q14008	Cytoskeleton-associated protein 5 OS=Homo sapiens GN=CKAP5 PE=1 SV=3	11.8602	24	33	24	1	2032	High	High	1.036	0.05	2.43167e+06	2.34712e+06	0	51.16	24	0.05	-0.0220011	-0.112697	0.455135	257	0.0230235	FALSE	0.984866
1753	High	Master Protein	Q9HD20	Manganese-transporting ATPase 13A1 OS=Homo sapiens GN=ATP13A1 PE=1 SV=2	11.6279	13	17	13	1	1204	High	High	1.036	0.05	1.54067e+06	1.48685e+06	0	38.04	13	0.05	-0.0220011	-0.112697	0.455135	258	0.0230158	FALSE	0.984866
1754	High	Master Protein	Q99653	Calcineurin B homologous protein 1 OS=Homo sapiens GN=CHP1 PE=1 SV=3	41.0256	7	12	7	1	195	High	High	1.036	0.05	1.00307e+06	967901	0	22.5	7	0.05	-0.0220011	-0.112697	0.455135	259	0.023008	FALSE	0.984866
1755	High	Master Protein	Q9UN37	Vacuolar protein sorting-associated protein 4A OS=Homo sapiens GN=VPS4A PE=1 SV=1	12.1281	6	8	3	1	437	High	High	1.036	0.05	524449	506080	0	15.69	6	0.05	-0.0220011	-0.112697	0.455135	260	0.0230003	FALSE	0.984866
1756	High	Master Protein	Q9NVH2	Integrator complex subunit 7 OS=Homo sapiens GN=INTS7 PE=1 SV=1	3.43035	2	2	2	1	962	High	High	1.036	0.05	80168.2	77362.7	0	4.39	2	0.05	-0.0220011	-0.112697	0.455135	261	0.0229926	FALSE	0.984866
1757	High	Master Protein	P47755	F-actin-capping protein subunit alpha-2 OS=Homo sapiens GN=CAPZA2 PE=1 SV=3	11.8881	2	4	2	1	286	High	High	1.036	0.05	297176	286916	0	16.92	2	0.05	-0.0220011	-0.112697	0.455135	262	0.0229849	FALSE	0.984866
1758	High	Master Protein	P62979	Ubiquitin-40S ribosomal protein S27a OS=Homo sapiens GN=RPS27A PE=1 SV=2	51.9231	8	149	2	1	156	High	High	1.036	0.05	1.9775e+07	1.90894e+07	6	323.24	8	0.05	-0.0220011	-0.112697	0.455135	263	0.0229771	FALSE	0.984866
1759	High	Master Protein	P62070	Ras-related protein R-Ras2 OS=Homo sapiens GN=RRAS2 PE=1 SV=1	53.9216	11	27	9	1	204	High	High	1.035	0.05	2.71299e+06	2.62145e+06	3	66.49	11	0.05	-0.0220011	-0.112697	0.455135	264	0.0229694	FALSE	0.984866
1760	High	Master Protein	O60271	C-Jun-amino-terminal kinase-interacting protein 4 OS=Homo sapiens GN=SPAG9 PE=1 SV=4	6.28312	7	7	7	1	1321	High	High	1.035	0.05	491127	474430	0	6.92	7	0.05	-0.0220011	-0.112697	0.455135	265	0.0229617	FALSE	0.984866
1761	High	Master Protein	Q15276	Rab GTPase-binding effector protein 1 OS=Homo sapiens GN=RABEP1 PE=1 SV=2	6.14849	4	4	4	1	862	High	High	1.035	0.05	92141	89036.1	0	5.95	4	0.05	-0.0220011	-0.112697	0.455135	266	0.022954	FALSE	0.984866
1762	High	Master Protein	P15153	Ras-related C3 botulinum toxin substrate 2 OS=Homo sapiens GN=RAC2 PE=1 SV=1	33.8542	8	24	3	1	192	High	High	1.035	0.05	6.73646e+06	6.5104e+06	4	53.2	8	0.05	-0.0220011	-0.112697	0.455135	267	0.0229463	FALSE	0.984866
1763	High	Master Protein	P61018	Ras-related protein Rab-4B OS=Homo sapiens GN=RAB4B PE=1 SV=1	13.1455	3	14	2	1	213	High	High	1.035	0.05	585496	565732	0	42.23	3	0.05	-0.0220011	-0.112697	0.455135	268	0.0229385	FALSE	0.984866
1764	High	Master Protein	O00410	Importin-5 OS=Homo sapiens GN=IPO5 PE=1 SV=4	20.784	17	21	17	1	1097	High	High	1.034	0.05	1.7917e+06	1.73223e+06	0	60.44	17	0.05	-0.0220011	-0.112697	0.455135	269	0.0229308	FALSE	0.984866
1765	High	Master Protein	Q9UDR5	Alpha-aminoadipic semialdehyde synthase, mitochondrial OS=Homo sapiens GN=AASS PE=1 SV=1	18.4665	15	29	15	1	926	High	High	1.034	0.05	3.88423e+06	3.75741e+06	0	56.33	15	0.05	-0.0220011	-0.112697	0.455135	270	0.0229231	FALSE	0.984866
1766	High	Master Protein	O75027	ATP-binding cassette sub-family B member 7, mitochondrial OS=Homo sapiens GN=ABCB7 PE=1 SV=2	18.883	12	19	12	1	752	High	High	1.034	0.05	1.70352e+06	1.64825e+06	0	51.09	12	0.05	-0.0220011	-0.112697	0.455135	271	0.0229154	FALSE	0.984866
1767	High	Master Protein	P17096	High mobility group protein HMG-I/HMG-Y OS=Homo sapiens GN=HMGA1 PE=1 SV=3	55.1402	6	17	6	1	107	High	High	1.034	0.05	795452	769633	0	41.82	6	0.05	-0.0220011	-0.112697	0.455135	272	0.0229077	FALSE	0.984866
1768	High	Master Protein	O95747	Serine/threonine-protein kinase OSR1 OS=Homo sapiens GN=OXSR1 PE=1 SV=1	19.3548	8	16	6	1	527	High	High	1.034	0.05	969490	937569	2	23.27	8	0.05	-0.0220011	-0.112697	0.455135	273	0.0228999	FALSE	0.984866
1769	High	Master Protein	Q9NUQ7	Ufm1-specific protease 2 OS=Homo sapiens GN=UFSP2 PE=1 SV=3	16.2047	6	8	6	1	469	High	High	1.034	0.05	558119	539983	0	16.2	6	0.05	-0.0220011	-0.112697	0.455135	274	0.0228922	FALSE	0.984866
1770	High	Master Protein	Q14669	E3 ubiquitin-protein ligase TRIP12 OS=Homo sapiens GN=TRIP12 PE=1 SV=1	2.56024	4	6	4	1	1992	High	High	1.034	0.05	216310	209127	0	13.72	4	0.05	-0.0220011	-0.112697	0.455135	275	0.0228845	FALSE	0.984866
1771	High	Master Protein	O15066	Kinesin-like protein KIF3B OS=Homo sapiens GN=KIF3B PE=1 SV=1	5.89023	4	4	3	1	747	High	High	1.034	0.05	461451	446123	1	0	4	0.05	-0.0220011	-0.112697	0.455135	276	0.0228768	FALSE	0.984866
1772	High	Master Protein	Q92614	Unconventional myosin-XVIIIa OS=Homo sapiens GN=MYO18A PE=1 SV=3	8.03311	13	19	13	1	2054	High	High	1.033	0.05	1.07755e+06	1.04268e+06	0	37.54	13	0.05	-0.0220011	-0.112697	0.455135	277	0.0228691	FALSE	0.984866
1773	High	Master Protein	P59998	Actin-related protein 2/3 complex subunit 4 OS=Homo sapiens GN=ARPC4 PE=1 SV=3	36.9048	6	19	6	1	168	High	High	1.033	0.05	2.66742e+06	2.58295e+06	0	43.36	6	0.05	-0.0220011	-0.112697	0.455135	278	0.0228613	FALSE	0.984866
1774	High	Master Protein	O00264	Membrane-associated progesterone receptor component 1 OS=Homo sapiens GN=PGRMC1 PE=1 SV=3	37.9487	7	15	6	1	195	High	High	1.033	0.05	5.66179e+06	5.47943e+06	1	38.1	7	0.05	-0.0220011	-0.112697	0.455135	279	0.0228536	FALSE	0.984866
1775	High	Master Protein	Q5HYI8	Rab-like protein 3 OS=Homo sapiens GN=RABL3 PE=1 SV=1	13.5593	2	3	2	1	236	High	High	1.033	0.05	3840.74	3716.26	0	9.73	2	0.05	-0.0220011	-0.112697	0.455135	280	0.0228459	FALSE	0.984866
1776	High	Master Protein	Q9Y2W6	Tudor and KH domain-containing protein OS=Homo sapiens GN=TDRKH PE=1 SV=2	3.20856	2	2	2	1	561	High	High	1.033	0.05	135827	131540	0	2.76	2	0.05	-0.0220011	-0.112697	0.455135	281	0.0228382	FALSE	0.984866
1777	High	Master Protein	P43490	Nicotinamide phosphoribosyltransferase OS=Homo sapiens GN=NAMPT PE=1 SV=1	37.4745	15	37	15	1	491	High	High	1.032	0.05	7.31938e+06	7.08966e+06	0	96.64	15	0.05	-0.0220011	-0.112697	0.455135	282	0.0228305	FALSE	0.984866
1778	High	Master Protein	Q9HD45	Transmembrane 9 superfamily member 3 OS=Homo sapiens GN=TM9SF3 PE=1 SV=2	10.5263	7	14	7	1	589	High	High	1.032	0.05	4.59271e+06	4.44962e+06	0	33.06	7	0.05	-0.0220011	-0.112697	0.455135	283	0.0228227	FALSE	0.984866
1779	High	Master Protein	Q96RP9	Elongation factor G, mitochondrial OS=Homo sapiens GN=GFM1 PE=1 SV=2	10.6525	6	7	6	1	751	High	High	1.032	0.05	519523	503331	0	10.4	6	0.05	-0.0220011	-0.112697	0.455135	284	0.022815	FALSE	0.984866
1782	High	Master Protein	Q9Y2I1	Nischarin OS=Homo sapiens GN=NISCH PE=1 SV=3	2.72606	3	3	3	1	1504	High	High	1.032	0.05	29749.7	28823.1	0	1.67	3	0.05	-0.0220011	-0.112697	0.455135	285	0.0228073	FALSE	0.984866
1783	High	Master Protein	Q9UHY7	Enolase-phosphatase E1 OS=Homo sapiens GN=ENOPH1 PE=1 SV=1	12.6437	2	3	2	1	261	High	High	1.032	0.05	110038	106630	0	4.62	2	0.05	-0.0220011	-0.112697	0.455135	286	0.0227996	FALSE	0.984866
1669	High	Master Protein	O75521	Enoyl-CoA delta isomerase 2, mitochondrial OS=Homo sapiens GN=ECI2 PE=1 SV=4	37.0558	12	25	12	1	394	High	High	1.046	0.06	4.09775e+06	3.91775e+06	0	78.18	12	0.06	-0.0120011	-0.0657111	0.473804	108	0.0241739	FALSE	0.991716
1671	High	Master Protein	P30825	High affinity cationic amino acid transporter 1 OS=Homo sapiens GN=SLC7A1 PE=1 SV=1	8.90302	5	8	5	1	629	High	High	1.046	0.06	3.44195e+06	3.2912e+06	0	17.43	5	0.06	-0.0120011	-0.0657111	0.473804	109	0.0241662	FALSE	0.991716
1675	High	Master Protein	Q00577	Transcriptional activator protein Pur-alpha OS=Homo sapiens GN=PURA PE=1 SV=2	13.0435	3	5	3	1	322	High	High	1.046	0.06	673696	644192	0	13.57	3	0.06	-0.0120011	-0.0657111	0.473804	110	0.0241584	FALSE	0.991716
1678	High	Master Protein	Q96G21	U3 small nucleolar ribonucleoprotein protein IMP4 OS=Homo sapiens GN=IMP4 PE=1 SV=1	8.59107	2	2	2	1	291	High	High	1.046	0.06	68513.8	65529	0	0	2	0.06	-0.0120011	-0.0657111	0.473804	111	0.0241507	FALSE	0.991716
1679	High	Master Protein	Q04323	UBX domain-containing protein 1 OS=Homo sapiens GN=UBXN1 PE=1 SV=2	9.42761	2	3	2	1	297	High	High	1.046	0.06	110945	106107	0	4.62	2	0.06	-0.0120011	-0.0657111	0.473804	112	0.024143	FALSE	0.991716
1680	High	Master Protein	Q9BY77	Polymerase delta-interacting protein 3 OS=Homo sapiens GN=POLDIP3 PE=1 SV=2	4.27553	2	2	2	1	421	High	High	1.046	0.06	26170.8	25018.1	0	4.61	2	0.06	-0.0120011	-0.0657111	0.473804	113	0.0241353	FALSE	0.991716
1681	High	Master Protein	P31948	Stress-induced-phosphoprotein 1 OS=Homo sapiens GN=STIP1 PE=1 SV=1	38.3057	26	41	26	1	543	High	High	1.045	0.06	6.01453e+06	5.7574e+06	0	70.46	26	0.06	-0.0120011	-0.0657111	0.473804	114	0.0241275	FALSE	0.991716
1682	High	Master Protein	Q9NX47	E3 ubiquitin-protein ligase MARCH5 OS=Homo sapiens GN=MARCH5 PE=1 SV=1	19.7842	4	4	4	1	278	High	High	1.045	0.06	259288	248205	0	12.96	4	0.06	-0.0120011	-0.0657111	0.473804	115	0.0241198	FALSE	0.991716
1683	High	Master Protein	Q9P2E5	Chondroitin sulfate glucuronyltransferase OS=Homo sapiens GN=CHPF2 PE=2 SV=2	4.79275	3	4	3	1	772	High	High	1.045	0.06	242992	232522	0	4.01	3	0.06	-0.0120011	-0.0657111	0.473804	116	0.0241121	FALSE	0.991716
1684	High	Master Protein	Q9Y6K0	Choline/ethanolaminephosphotransferase 1 OS=Homo sapiens GN=CEPT1 PE=1 SV=1	4.08654	2	2	2	1	416	High	High	1.045	0.06	905025	865707	0	4.64	2	0.06	-0.0120011	-0.0657111	0.473804	117	0.0241044	FALSE	0.991716
1685	High	Master Protein	Q86YN1	Dolichyldiphosphatase 1 OS=Homo sapiens GN=DOLPP1 PE=2 SV=1	13.4454	2	2	2	1	238	High	High	1.045	0.06	194800	186347	0	6.21	2	0.06	-0.0120011	-0.0657111	0.473804	118	0.0240967	FALSE	0.991716
1686	High	Master Protein	Q96H20	Vacuolar-sorting protein SNF8 OS=Homo sapiens GN=SNF8 PE=1 SV=1	8.13953	2	2	2	1	258	High	High	1.045	0.06	76995.6	73698.4	0	1.72	2	0.06	-0.0120011	-0.0657111	0.473804	119	0.0240889	FALSE	0.991716
1687	High	Master Protein	Q9H4A3	Serine/threonine-protein kinase WNK1 OS=Homo sapiens GN=WNK1 PE=1 SV=2	0.713686	2	2	2	1	2382	High	High	1.045	0.06	130456	124811	0	2.24	2	0.06	-0.0120011	-0.0657111	0.473804	120	0.0240812	FALSE	0.991716
1688	High	Master Protein	P50213	Isocitrate dehydrogenase [NAD] subunit alpha, mitochondrial OS=Homo sapiens GN=IDH3A PE=1 SV=1	30.3279	10	20	10	1	366	High	High	1.044	0.06	4.43084e+06	4.2426e+06	0	45.7	10	0.06	-0.0120011	-0.0657111	0.473804	121	0.0240735	FALSE	0.991716
1689	High	Master Protein	Q9NYK5	39S ribosomal protein L39, mitochondrial OS=Homo sapiens GN=MRPL39 PE=1 SV=3	27.8107	10	12	10	1	338	High	High	1.044	0.06	944943	905016	0	21.38	10	0.06	-0.0120011	-0.0657111	0.473804	122	0.0240658	FALSE	0.991716
1690	High	Master Protein	O15230	Laminin subunit alpha-5 OS=Homo sapiens GN=LAMA5 PE=1 SV=8	2.92287	8	10	8	1	3695	High	High	1.044	0.06	301992	289366	0	10.9	8	0.06	-0.0120011	-0.0657111	0.473804	123	0.0240581	FALSE	0.991716
1691	High	Master Protein	P62820	Ras-related protein Rab-1A OS=Homo sapiens GN=RAB1A PE=1 SV=3	73.6585	14	70	6	1	205	High	High	1.044	0.06	2.18598e+06	2.09359e+06	0	203.63	14	0.06	-0.0120011	-0.0657111	0.473804	124	0.0240503	FALSE	0.991716
1692	High	Master Protein	Q9H7D0	Dedicator of cytokinesis protein 5 OS=Homo sapiens GN=DOCK5 PE=1 SV=3	4.06417	5	5	5	1	1870	High	High	1.044	0.06	34361	32915.3	0	4.54	5	0.06	-0.0120011	-0.0657111	0.473804	125	0.0240426	FALSE	0.991716
1693	High	Master Protein	O43402	ER membrane protein complex subunit 8 OS=Homo sapiens GN=EMC8 PE=1 SV=1	17.619	4	7	4	1	210	High	High	1.044	0.06	259896	248945	0	16.52	4	0.06	-0.0120011	-0.0657111	0.473804	126	0.0240349	FALSE	0.991716
1694	High	Master Protein	Q9Y2R5	28S ribosomal protein S17, mitochondrial OS=Homo sapiens GN=MRPS17 PE=1 SV=1	22.3077	3	6	3	1	130	High	High	1.044	0.06	371843	356081	0	10.07	3	0.06	-0.0120011	-0.0657111	0.473804	127	0.0240272	FALSE	0.991716
1695	High	Master Protein	Q92574	Hamartin OS=Homo sapiens GN=TSC1 PE=1 SV=2	2.49141	3	3	3	1	1164	High	High	1.044	0.06	139567	133632	0	3.9	3	0.06	-0.0120011	-0.0657111	0.473804	128	0.0240195	FALSE	0.991716
1696	High	Master Protein	Q9NZL9	Methionine adenosyltransferase 2 subunit beta OS=Homo sapiens GN=MAT2B PE=1 SV=1	7.78443	2	2	2	1	334	High	High	1.044	0.06	255530	244791	0	2.55	2	0.06	-0.0120011	-0.0657111	0.473804	129	0.0240117	FALSE	0.991716
1697	High	Master Protein	Q86TI2	Dipeptidyl peptidase 9 OS=Homo sapiens GN=DPP9 PE=1 SV=3	2.20162	2	2	2	1	863	High	High	1.044	0.06	97767.5	93653.1	0	5.27	2	0.06	-0.0120011	-0.0657111	0.473804	130	0.024004	FALSE	0.991716
1698	High	Master Protein	P38606	V-type proton ATPase catalytic subunit A OS=Homo sapiens GN=ATP6V1A PE=1 SV=2	24.6353	13	21	13	1	617	High	High	1.043	0.06	3.26744e+06	3.13194e+06	0	53.75	13	0.06	-0.0120011	-0.0657111	0.473804	131	0.0239963	FALSE	0.991716
1699	High	Master Protein	P82675	28S ribosomal protein S5, mitochondrial OS=Homo sapiens GN=MRPS5 PE=1 SV=2	22.093	10	12	10	1	430	High	High	1.043	0.06	1.11338e+06	1.06794e+06	0	21.88	10	0.06	-0.0120011	-0.0657111	0.473804	132	0.0239886	FALSE	0.991716
1700	High	Master Protein	P11310	Medium-chain specific acyl-CoA dehydrogenase, mitochondrial OS=Homo sapiens GN=ACADM PE=1 SV=1	26.6033	8	12	8	1	421	High	High	1.043	0.06	1.54134e+06	1.47732e+06	0	31.11	8	0.06	-0.0120011	-0.0657111	0.473804	133	0.0239809	FALSE	0.991716
1701	High	Master Protein	P28066	Proteasome subunit alpha type-5 OS=Homo sapiens GN=PSMA5 PE=1 SV=3	46.0581	7	11	7	1	241	High	High	1.043	0.06	380995	365267	0	35.86	7	0.06	-0.0120011	-0.0657111	0.473804	134	0.0239731	FALSE	0.991716
1702	High	Master Protein	P01111	GTPase NRas OS=Homo sapiens GN=NRAS PE=1 SV=1	31.746	5	15	4	1	189	High	High	1.043	0.06	1.8289e+06	1.75434e+06	1	31.7	5	0.06	-0.0120011	-0.0657111	0.473804	135	0.0239654	FALSE	0.991716
1703	High	Master Protein	Q96GK7	Fumarylacetoacetate hydrolase domain-containing protein 2A OS=Homo sapiens GN=FAHD2A PE=1 SV=1	21.3376	4	5	4	1	314	High	High	1.043	0.06	209657	201040	0	13.13	4	0.06	-0.0120011	-0.0657111	0.473804	136	0.0239577	FALSE	0.991716
1704	High	Master Protein	P62633	Cellular nucleic acid-binding protein OS=Homo sapiens GN=CNBP PE=1 SV=1	20.904	3	3	3	1	177	High	High	1.043	0.06	153883	147500	0	7.68	3	0.06	-0.0120011	-0.0657111	0.473804	137	0.02395	FALSE	0.991716
1705	High	Master Protein	Q9BXI6	TBC1 domain family member 10A OS=Homo sapiens GN=TBC1D10A PE=1 SV=1	7.28346	3	4	3	1	508	High	High	1.043	0.06	180653	173229	0	4.29	3	0.06	-0.0120011	-0.0657111	0.473804	138	0.0239422	FALSE	0.991716
1706	High	Master Protein	Q9Y619	Mitochondrial ornithine transporter 1 OS=Homo sapiens GN=SLC25A15 PE=1 SV=1	4.98339	2	2	2	1	301	High	High	1.043	0.06	276322	264814	0	4.88	2	0.06	-0.0120011	-0.0657111	0.473804	139	0.0239345	FALSE	0.991716
1707	High	Master Protein	Q9GZZ1	N-alpha-acetyltransferase 50 OS=Homo sapiens GN=NAA50 PE=1 SV=1	23.0769	4	5	4	1	169	High	High	1.042	0.06	232803	223514	0	10.92	4	0.06	-0.0120011	-0.0657111	0.473804	140	0.0239268	FALSE	0.991716
1708	High	Master Protein	O15260	Surfeit locus protein 4 OS=Homo sapiens GN=SURF4 PE=1 SV=3	17.1004	4	11	4	1	269	High	High	1.042	0.06	3.73549e+06	3.58656e+06	0	35.53	4	0.06	-0.0120011	-0.0657111	0.473804	141	0.0239191	FALSE	0.991716
1709	High	Master Protein	Q96ET8	Golgi apparatus membrane protein TVP23 homolog C OS=Homo sapiens GN=TVP23C PE=1 SV=3	9.42029	3	4	3	1	276	High	High	1.042	0.06	884486	849082	0	11.15	3	0.06	-0.0120011	-0.0657111	0.473804	142	0.0239114	FALSE	0.991716
1710	High	Master Protein	P62834	Ras-related protein Rap-1A OS=Homo sapiens GN=RAP1A PE=1 SV=1	51.6304	11	30	3	1	184	High	High	1.042	0.06	718300	689676	0	77.55	11	0.06	-0.0120011	-0.0657111	0.473804	143	0.0239036	FALSE	0.991716
1711	High	Master Protein	P33240	Cleavage stimulation factor subunit 2 OS=Homo sapiens GN=CSTF2 PE=1 SV=1	4.85269	3	4	3	1	577	High	High	1.042	0.06	342794	328887	0	3.96	3	0.06	-0.0120011	-0.0657111	0.473804	144	0.0238959	FALSE	0.991716
1712	High	Master Protein	Q9NVV0	Trimeric intracellular cation channel type B OS=Homo sapiens GN=TMEM38B PE=1 SV=1	11.6838	3	5	3	1	291	High	High	1.042	0.06	1.09934e+06	1.05516e+06	0	8.73	3	0.06	-0.0120011	-0.0657111	0.473804	145	0.0238882	FALSE	0.991716
1713	High	Master Protein	P34059	N-acetylgalactosamine-6-sulfatase OS=Homo sapiens GN=GALNS PE=1 SV=1	3.2567	2	2	2	1	522	High	High	1.042	0.06	52015.9	49896.3	0	2.49	2	0.06	-0.0120011	-0.0657111	0.473804	146	0.0238805	FALSE	0.991716
1714	High	Master Protein	P34932	Heat shock 70 kDa protein 4 OS=Homo sapiens GN=HSPA4 PE=1 SV=4	37.0238	27	46	23	1	840	High	High	1.041	0.06	6.27699e+06	6.028e+06	4	110.63	27	0.06	-0.0120011	-0.0657111	0.473804	147	0.0238728	FALSE	0.991716
1715	High	Master Protein	Q16698	2,4-dienoyl-CoA reductase, mitochondrial OS=Homo sapiens GN=DECR1 PE=1 SV=1	48.3582	16	28	16	1	335	High	High	1.041	0.06	8.84804e+06	8.50183e+06	0	76.79	16	0.06	-0.0120011	-0.0657111	0.473804	148	0.023865	FALSE	0.991716
1716	High	Master Protein	Q9H9B4	Sideroflexin-1 OS=Homo sapiens GN=SFXN1 PE=1 SV=4	41.6149	12	60	10	1	322	High	High	1.041	0.06	8.9746e+06	8.62459e+06	0	167.25	12	0.06	-0.0120011	-0.0657111	0.473804	149	0.0238573	FALSE	0.991716
1717	High	Master Protein	P20339	Ras-related protein Rab-5A OS=Homo sapiens GN=RAB5A PE=1 SV=2	54.4186	8	36	6	1	215	High	High	1.041	0.06	912722	876940	0	102.9	8	0.06	-0.0120011	-0.0657111	0.473804	150	0.0238496	FALSE	0.991716
1718	High	Master Protein	Q8IWE2	Protein NOXP20 OS=Homo sapiens GN=FAM114A1 PE=1 SV=2	15.0977	5	7	5	1	563	High	High	1.041	0.06	729643	701008	0	19.63	5	0.06	-0.0120011	-0.0657111	0.473804	151	0.0238419	FALSE	0.991716
1719	High	Master Protein	Q5SWX8	Protein odr-4 homolog OS=Homo sapiens GN=ODR4 PE=1 SV=1	8.37004	4	5	4	1	454	High	High	1.041	0.06	794119	762943	0	4.33	4	0.06	-0.0120011	-0.0657111	0.473804	152	0.0238342	FALSE	0.991716
1720	High	Master Protein	Q9UJ41	Rab5 GDP/GTP exchange factor OS=Homo sapiens GN=RABGEF1 PE=1 SV=2	3.24859	2	2	2	1	708	High	High	1.041	0.06	46927.3	45080.9	0	5.14	2	0.06	-0.0120011	-0.0657111	0.473804	153	0.0238264	FALSE	0.991716
1721	High	Master Protein	Q16134	Electron transfer flavoprotein-ubiquinone oxidoreductase, mitochondrial OS=Homo sapiens GN=ETFDH PE=1 SV=2	29.0113	16	30	16	1	617	High	High	1.04	0.06	4.69078e+06	4.51174e+06	0	69.79	16	0.06	-0.0120011	-0.0657111	0.473804	154	0.0238187	FALSE	0.991716
1722	High	Master Protein	O75439	Mitochondrial-processing peptidase subunit beta OS=Homo sapiens GN=PMPCB PE=1 SV=2	25.9714	10	18	10	1	489	High	High	1.04	0.06	1.48481e+06	1.42713e+06	0	47.52	10	0.06	-0.0120011	-0.0657111	0.473804	155	0.023811	FALSE	0.991716
1723	High	Master Protein	Q8IY17	Neuropathy target esterase OS=Homo sapiens GN=PNPLA6 PE=1 SV=2	2.48902	3	5	3	1	1366	High	High	1.04	0.06	376297	361729	0	13.01	3	0.06	-0.0120011	-0.0657111	0.473804	156	0.0238033	FALSE	0.991716
1724	High	Master Protein	Q9H3H5	UDP-N-acetylglucosamine--dolichyl-phosphate N-acetylglucosaminephosphotransferase OS=Homo sapiens GN=DPAGT1 PE=1 SV=2	6.61765	3	6	3	1	408	High	High	1.04	0.06	1.28774e+06	1.23797e+06	0	13.48	3	0.06	-0.0120011	-0.0657111	0.473804	157	0.0237956	FALSE	0.991716
1725	High	Master Protein	O96013	Serine/threonine-protein kinase PAK 4 OS=Homo sapiens GN=PAK4 PE=1 SV=1	3.5533	2	3	2	1	591	High	High	1.04	0.06	431389	414704	0	5.2	2	0.06	-0.0120011	-0.0657111	0.473804	158	0.0237878	FALSE	0.991716
1726	High	Master Protein	Q01459	Di-N-acetylchitobiase OS=Homo sapiens GN=CTBS PE=1 SV=1	7.53247	2	3	2	1	385	High	High	1.04	0.06	250797	241104	0	5.31	2	0.06	-0.0120011	-0.0657111	0.473804	159	0.0237801	FALSE	0.991716
1727	High	Master Protein	P43353	Aldehyde dehydrogenase family 3 member B1 OS=Homo sapiens GN=ALDH3B1 PE=1 SV=1	4.48718	2	2	2	1	468	High	High	1.04	0.06	90727	87233.9	0	5.62	2	0.06	-0.0120011	-0.0657111	0.473804	160	0.0237724	FALSE	0.991716
1728	High	Master Protein	O00299	Chloride intracellular channel protein 1 OS=Homo sapiens GN=CLIC1 PE=1 SV=4	67.6349	14	43	14	1	241	High	High	1.039	0.06	1.46364e+07	1.40808e+07	0	119.41	14	0.06	-0.0120011	-0.0657111	0.473804	161	0.0237647	FALSE	0.991716
1729	High	Master Protein	O15121	Sphingolipid delta(4)-desaturase DES1 OS=Homo sapiens GN=DEGS1 PE=1 SV=1	8.35913	3	3	3	1	323	High	High	1.039	0.06	95315.2	91709.6	0	4.78	3	0.06	-0.0120011	-0.0657111	0.473804	162	0.0237569	FALSE	0.991716
1730	High	Master Protein	Q8NB49	Phospholipid-transporting ATPase IG OS=Homo sapiens GN=ATP11C PE=1 SV=3	4.68198	4	4	3	1	1132	High	High	1.039	0.06	105141	101170	0	8.29	4	0.06	-0.0120011	-0.0657111	0.473804	163	0.0237492	FALSE	0.991716
1731	High	Master Protein	Q9NNW5	WD repeat-containing protein 6 OS=Homo sapiens GN=WDR6 PE=1 SV=1	2.76539	2	2	2	1	1121	High	High	1.039	0.06	42285.3	40688.9	0	5.81	2	0.06	-0.0120011	-0.0657111	0.473804	164	0.0237415	FALSE	0.991716
1621	High	Master Protein	Q9BUP3	Oxidoreductase HTATIP2 OS=Homo sapiens GN=HTATIP2 PE=1 SV=2	23.5537	6	9	6	1	242	High	High	1.053	0.07	1.18576e+06	1.12629e+06	0	12.85	6	0.07	-0.00200112	-0.0187252	0.49253	1	0.025	FALSE	0.998614
1624	High	Master Protein	Q8NBI5	Solute carrier family 43 member 3 OS=Homo sapiens GN=SLC43A3 PE=1 SV=2	5.29532	3	8	3	1	491	High	High	1.053	0.07	838834	796501	0	12.1	3	0.07	-0.00200112	-0.0187252	0.49253	2	0.0249923	FALSE	0.998614
1625	High	Master Protein	Q9UGI8	Testin OS=Homo sapiens GN=TES PE=1 SV=1	33.2542	11	20	11	1	421	High	High	1.052	0.07	996611	947412	0	37.8	11	0.07	-0.00200112	-0.0187252	0.49253	3	0.0249846	FALSE	0.998614
1626	High	Master Protein	O95239	Chromosome-associated kinesin KIF4A OS=Homo sapiens GN=KIF4A PE=1 SV=3	7.46753	9	9	8	1	1232	High	High	1.052	0.07	625838	594826	1	13.87	9	0.07	-0.00200112	-0.0187252	0.49253	4	0.0249768	FALSE	0.998614
1627	High	Master Protein	O94874	E3 UFM1-protein ligase 1 OS=Homo sapiens GN=UFL1 PE=1 SV=2	8.06045	5	6	5	1	794	High	High	1.052	0.07	838495	796836	0	20.02	5	0.07	-0.00200112	-0.0187252	0.49253	5	0.0249691	FALSE	0.998614
1628	High	Master Protein	Q13425	Beta-2-syntrophin OS=Homo sapiens GN=SNTB2 PE=1 SV=1	11.8519	6	6	5	1	540	High	High	1.052	0.07	428235	407157	1	8.59	6	0.07	-0.00200112	-0.0187252	0.49253	6	0.0249614	FALSE	0.998614
1629	High	Master Protein	P63151	Serine/threonine-protein phosphatase 2A 55 kDa regulatory subunit B alpha isoform OS=Homo sapiens GN=PPP2R2A PE=1 SV=1	12.7517	6	9	4	1	447	High	High	1.052	0.07	594628	565208	2	18.59	6	0.07	-0.00200112	-0.0187252	0.49253	7	0.0249537	FALSE	0.998614
1630	High	Master Protein	Q92743	Serine protease HTRA1 OS=Homo sapiens GN=HTRA1 PE=1 SV=1	9.58333	4	4	4	1	480	High	High	1.052	0.07	132837	126298	0	11.77	4	0.07	-0.00200112	-0.0187252	0.49253	8	0.024946	FALSE	0.998614
1631	High	Master Protein	O75356	Ectonucleoside triphosphate diphosphohydrolase 5 OS=Homo sapiens GN=ENTPD5 PE=1 SV=1	5.37383	2	2	2	1	428	High	High	1.052	0.07	60182.1	57219.1	0	2.52	2	0.07	-0.00200112	-0.0187252	0.49253	9	0.0249382	FALSE	0.998614
1632	High	Master Protein	Q9Y3F4	Serine-threonine kinase receptor-associated protein OS=Homo sapiens GN=STRAP PE=1 SV=1	36.5714	11	16	11	1	350	High	High	1.051	0.07	1.69844e+06	1.61632e+06	0	42.27	11	0.07	-0.00200112	-0.0187252	0.49253	10	0.0249305	FALSE	0.998614
1633	High	Master Protein	Q16822	Phosphoenolpyruvate carboxykinase [GTP], mitochondrial OS=Homo sapiens GN=PCK2 PE=1 SV=3	16.875	10	15	10	1	640	High	High	1.051	0.07	1.35022e+06	1.28508e+06	0	31.85	10	0.07	-0.00200112	-0.0187252	0.49253	11	0.0249228	FALSE	0.998614
1634	High	Master Protein	Q14C86	GTPase-activating protein and VPS9 domain-containing protein 1 OS=Homo sapiens GN=GAPVD1 PE=1 SV=2	5.00677	7	13	7	1	1478	High	High	1.051	0.07	1.37447e+06	1.30786e+06	0	23.62	7	0.07	-0.00200112	-0.0187252	0.49253	12	0.0249151	FALSE	0.998614
1635	High	Master Protein	Q15833	Syntaxin-binding protein 2 OS=Homo sapiens GN=STXBP2 PE=1 SV=2	13.828	6	10	6	1	593	High	High	1.051	0.07	333390	317244	0	16.2	6	0.07	-0.00200112	-0.0187252	0.49253	13	0.0249074	FALSE	0.998614
1636	High	Master Protein	Q8TDX7	Serine/threonine-protein kinase Nek7 OS=Homo sapiens GN=NEK7 PE=1 SV=1	15.894	4	7	4	1	302	High	High	1.051	0.07	1.44423e+06	1.37401e+06	0	22.62	4	0.07	-0.00200112	-0.0187252	0.49253	14	0.0248996	FALSE	0.998614
1637	High	Master Protein	Q10567	AP-1 complex subunit beta-1 OS=Homo sapiens GN=AP1B1 PE=1 SV=2	15.49	14	18	3	1	949	High	High	1.051	0.07	247813	235778	0	40.84	14	0.07	-0.00200112	-0.0187252	0.49253	15	0.0248919	FALSE	0.998614
1638	High	Master Protein	Q92608	Dedicator of cytokinesis protein 2 OS=Homo sapiens GN=DOCK2 PE=1 SV=2	1.14754	2	2	2	1	1830	High	High	1.051	0.07	78105.3	74322.5	0	2.82	2	0.07	-0.00200112	-0.0187252	0.49253	16	0.0248842	FALSE	0.998614
1639	High	Master Protein	P13667	Protein disulfide-isomerase A4 OS=Homo sapiens GN=PDIA4 PE=1 SV=2	55.0388	38	127	38	1	645	High	High	1.05	0.07	2.47944e+07	2.36216e+07	0	274.63	38	0.07	-0.00200112	-0.0187252	0.49253	17	0.0248765	FALSE	0.998614
1640	High	Master Protein	O75131	Copine-3 OS=Homo sapiens GN=CPNE3 PE=1 SV=1	23.0912	14	29	13	1	537	High	High	1.05	0.07	6.36958e+06	6.06721e+06	1	68.4	14	0.07	-0.00200112	-0.0187252	0.49253	18	0.0248687	FALSE	0.998614
1641	High	Master Protein	P45974	Ubiquitin carboxyl-terminal hydrolase 5 OS=Homo sapiens GN=USP5 PE=1 SV=2	16.0839	11	12	10	1	858	High	High	1.05	0.07	926922	882387	1	24.18	11	0.07	-0.00200112	-0.0187252	0.49253	19	0.024861	FALSE	0.998614
1642	High	Master Protein	Q6PI78	Transmembrane protein 65 OS=Homo sapiens GN=TMEM65 PE=1 SV=2	19.5833	4	7	4	1	240	High	High	1.05	0.07	732248	697259	0	17.91	4	0.07	-0.00200112	-0.0187252	0.49253	20	0.0248533	FALSE	0.998614
1643	High	Master Protein	Q8N5K1	CDGSH iron-sulfur domain-containing protein 2 OS=Homo sapiens GN=CISD2 PE=1 SV=1	36.2963	4	11	4	1	135	High	High	1.05	0.07	1.62531e+06	1.54746e+06	0	34.83	4	0.07	-0.00200112	-0.0187252	0.49253	21	0.0248456	FALSE	0.998614
1644	High	Master Protein	P53634	Dipeptidyl peptidase 1 OS=Homo sapiens GN=CTSC PE=1 SV=2	6.04752	3	3	3	1	463	High	High	1.05	0.07	20988	19985.8	0	5.64	3	0.07	-0.00200112	-0.0187252	0.49253	22	0.0248379	FALSE	0.998614
1645	High	Master Protein	Q8N5N7	39S ribosomal protein L50, mitochondrial OS=Homo sapiens GN=MRPL50 PE=1 SV=2	27.2152	3	6	3	1	158	High	High	1.05	0.07	133550	127151	0	4.87	3	0.07	-0.00200112	-0.0187252	0.49253	23	0.0248301	FALSE	0.998614
1646	High	Master Protein	Q9P2E3	NFX1-type zinc finger-containing protein 1 OS=Homo sapiens GN=ZNFX1 PE=2 SV=2	1.51199	3	5	3	1	1918	High	High	1.05	0.07	112859	107516	0	5.35	3	0.07	-0.00200112	-0.0187252	0.49253	24	0.0248224	FALSE	0.998614
1647	Medium	Master Protein	Q9Y4I1	Unconventional myosin-Va OS=Homo sapiens GN=MYO5A PE=1 SV=2	1.07817	2	2	2	1	1855	High	High	1.05	0.07	84446.5	80413.1	0	2.09	2	0.07	-0.00200112	-0.0187252	0.49253	25	0.0248147	FALSE	0.998614
1648	High	Master Protein	P35914	Hydroxymethylglutaryl-CoA lyase, mitochondrial OS=Homo sapiens GN=HMGCL PE=1 SV=2	26.7692	8	15	8	1	325	High	High	1.049	0.07	2.13055e+06	2.03046e+06	0	42.34	8	0.07	-0.00200112	-0.0187252	0.49253	26	0.024807	FALSE	0.998614
1649	High	Master Protein	P10909	Clusterin OS=Homo sapiens GN=CLU PE=1 SV=1	18.0401	7	11	7	1	449	High	High	1.049	0.07	734410	700109	0	25.15	7	0.07	-0.00200112	-0.0187252	0.49253	27	0.0247993	FALSE	0.998614
1650	High	Master Protein	P49753	Acyl-coenzyme A thioesterase 2, mitochondrial OS=Homo sapiens GN=ACOT2 PE=1 SV=6	13.4576	5	5	5	1	483	High	High	1.049	0.07	260153	247929	0	12.66	5	0.07	-0.00200112	-0.0187252	0.49253	28	0.0247915	FALSE	0.998614
1651	High	Master Protein	Q9BQ67	Glutamate-rich WD repeat-containing protein 1 OS=Homo sapiens GN=GRWD1 PE=1 SV=1	8.96861	3	4	3	1	446	High	High	1.049	0.07	945741	901269	0	13.66	3	0.07	-0.00200112	-0.0187252	0.49253	29	0.0247838	FALSE	0.998614
1652	High	Master Protein	O14972	Down syndrome critical region protein 3 OS=Homo sapiens GN=DSCR3 PE=2 SV=1	9.76431	2	4	2	1	297	High	High	1.049	0.07	223350	212820	0	15.75	2	0.07	-0.00200112	-0.0187252	0.49253	30	0.0247761	FALSE	0.998614
1653	High	Master Protein	P82664	28S ribosomal protein S10, mitochondrial OS=Homo sapiens GN=MRPS10 PE=1 SV=2	9.45274	2	3	2	1	201	High	High	1.049	0.07	532522	507742	0	7.87	2	0.07	-0.00200112	-0.0187252	0.49253	31	0.0247684	FALSE	0.998614
1654	High	Master Protein	O60427	Fatty acid desaturase 1 OS=Homo sapiens GN=FADS1 PE=1 SV=3	5.85586	2	2	2	1	444	High	High	1.049	0.07	136255	129874	0	5.26	2	0.07	-0.00200112	-0.0187252	0.49253	32	0.0247607	FALSE	0.998614
1655	High	Master Protein	O00116	Alkyldihydroxyacetonephosphate synthase, peroxisomal OS=Homo sapiens GN=AGPS PE=1 SV=1	34.1945	21	49	21	1	658	High	High	1.048	0.07	6.43134e+06	6.13548e+06	0	134.64	21	0.07	-0.00200112	-0.0187252	0.49253	33	0.0247529	FALSE	0.998614
1656	High	Master Protein	O15228	Dihydroxyacetone phosphate acyltransferase OS=Homo sapiens GN=GNPAT PE=1 SV=1	13.0882	7	10	7	1	680	High	High	1.048	0.07	742910	708803	0	23.15	7	0.07	-0.00200112	-0.0187252	0.49253	34	0.0247452	FALSE	0.998614
1657	High	Master Protein	Q8IWT6	Volume-regulated anion channel subunit LRRC8A OS=Homo sapiens GN=LRRC8A PE=1 SV=1	5.80247	5	6	5	1	810	High	High	1.048	0.07	435872	415900	0	13.66	5	0.07	-0.00200112	-0.0187252	0.49253	35	0.0247375	FALSE	0.998614
1658	High	Master Protein	Q9UKK9	ADP-sugar pyrophosphatase OS=Homo sapiens GN=NUDT5 PE=1 SV=1	19.1781	4	8	4	1	219	High	High	1.048	0.07	1.15399e+06	1.10065e+06	0	18.92	4	0.07	-0.00200112	-0.0187252	0.49253	36	0.0247298	FALSE	0.998614
1659	High	Master Protein	Q96A26	Protein FAM162A OS=Homo sapiens GN=FAM162A PE=1 SV=2	25.3247	4	8	4	1	154	High	High	1.048	0.07	1.81578e+06	1.7333e+06	0	20.4	4	0.07	-0.00200112	-0.0187252	0.49253	37	0.0247221	FALSE	0.998614
1660	High	Master Protein	Q7L8L6	FAST kinase domain-containing protein 5, mitochondrial OS=Homo sapiens GN=FASTKD5 PE=1 SV=1	4.18848	3	5	3	1	764	High	High	1.048	0.07	203664	194365	0	1.99	3	0.07	-0.00200112	-0.0187252	0.49253	38	0.0247143	FALSE	0.998614
1661	High	Master Protein	P63279	SUMO-conjugating enzyme UBC9 OS=Homo sapiens GN=UBE2I PE=1 SV=1	14.557	3	4	3	1	158	High	High	1.048	0.07	960944	917358	0	12.59	3	0.07	-0.00200112	-0.0187252	0.49253	39	0.0247066	FALSE	0.998614
1662	High	Master Protein	O75787	Renin receptor OS=Homo sapiens GN=ATP6AP2 PE=1 SV=2	7.42857	2	3	2	1	350	High	High	1.048	0.07	482779	460518	0	3.14	2	0.07	-0.00200112	-0.0187252	0.49253	40	0.0246989	FALSE	0.998614
1663	High	Master Protein	Q96AE7	Tetratricopeptide repeat protein 17 OS=Homo sapiens GN=TTC17 PE=1 SV=1	1.48992	2	2	2	1	1141	High	High	1.048	0.07	45208.9	43140.9	0	2.3	2	0.07	-0.00200112	-0.0187252	0.49253	41	0.0246912	FALSE	0.998614
1664	High	Master Protein	P16152	Carbonyl reductase [NADPH] 1 OS=Homo sapiens GN=CBR1 PE=1 SV=3	45.4874	12	21	10	1	277	High	High	1.047	0.07	2.61526e+06	2.49758e+06	2	55.45	12	0.07	-0.00200112	-0.0187252	0.49253	42	0.0246834	FALSE	0.998614
1665	High	Master Protein	Q16658	Fascin OS=Homo sapiens GN=FSCN1 PE=1 SV=3	9.73631	3	5	3	1	493	High	High	1.047	0.07	272442	260272	0	15.17	3	0.07	-0.00200112	-0.0187252	0.49253	43	0.0246757	FALSE	0.998614
1666	High	Master Protein	P0C0S5	Histone H2A.Z OS=Homo sapiens GN=H2AFZ PE=1 SV=2	20.3125	4	24	2	1	128	High	High	1.047	0.07	2.35324e+06	2.24691e+06	0	51.41	4	0.07	-0.00200112	-0.0187252	0.49253	44	0.024668	FALSE	0.998614
1667	High	Master Protein	O60830	Mitochondrial import inner membrane translocase subunit Tim17-B OS=Homo sapiens GN=TIMM17B PE=1 SV=1	26.1628	2	7	2	1	172	High	High	1.047	0.07	277605	265108	0	28.42	2	0.07	-0.00200112	-0.0187252	0.49253	45	0.0246603	FALSE	0.998614
1668	High	Master Protein	Q13685	Angio-associated migratory cell protein OS=Homo sapiens GN=AAMP PE=1 SV=2	5.99078	2	2	2	1	434	High	High	1.047	0.07	370884	354281	0	5.1	2	0.07	-0.00200112	-0.0187252	0.49253	46	0.0246526	FALSE	0.998614
1670	High	Master Protein	P04899	Guanine nucleotide-binding protein G(i) subunit alpha-2 OS=Homo sapiens GN=GNAI2 PE=1 SV=3	54.6479	16	40	9	1	355	High	High	1.046	0.07	9.47673e+06	9.05789e+06	7	99.86	16	0.07	-0.00200112	-0.0187252	0.49253	47	0.0246448	FALSE	0.998614
1672	High	Master Protein	Q8N392	Rho GTPase-activating protein 18 OS=Homo sapiens GN=ARHGAP18 PE=1 SV=3	8.29563	5	5	5	1	663	High	High	1.046	0.07	527890	504604	0	5.92	5	0.07	-0.00200112	-0.0187252	0.49253	48	0.0246371	FALSE	0.998614
1673	High	Master Protein	Q8NHP6	Motile sperm domain-containing protein 2 OS=Homo sapiens GN=MOSPD2 PE=1 SV=1	5.79151	3	5	3	1	518	High	High	1.046	0.07	582686	556870	0	4.62	3	0.07	-0.00200112	-0.0187252	0.49253	49	0.0246294	FALSE	0.998614
1674	High	Master Protein	Q9H6U8	Alpha-1,2-mannosyltransferase ALG9 OS=Homo sapiens GN=ALG9 PE=1 SV=2	8.34697	3	3	3	1	611	High	High	1.046	0.07	518338	495413	0	8.64	3	0.07	-0.00200112	-0.0187252	0.49253	50	0.0246217	FALSE	0.998614
1676	High	Master Protein	Q8WVQ1	Soluble calcium-activated nucleotidase 1 OS=Homo sapiens GN=CANT1 PE=1 SV=1	11.9701	3	4	3	1	401	High	High	1.046	0.07	180326	172358	0	9.92	3	0.07	-0.00200112	-0.0187252	0.49253	51	0.024614	FALSE	0.998614
1677	High	Master Protein	Q96BW5	Phosphotriesterase-related protein OS=Homo sapiens GN=PTER PE=1 SV=1	9.45559	3	3	3	1	349	High	High	1.046	0.07	194409	185839	0	7.84	3	0.07	-0.00200112	-0.0187252	0.49253	52	0.0246062	FALSE	0.998614
1568	High	Master Protein	P37198	Nuclear pore glycoprotein p62 OS=Homo sapiens GN=NUP62 PE=1 SV=3	2.68199	2	2	2	1	522	High	High	1.06	0.08	13628.8	12856.6	0	5.19	2	0.08	0.00799888	0.0282606	0.488727	53	0.0245985	FALSE	1.00556
1569	High	Master Protein	P41226	Ubiquitin-like modifier-activating enzyme 7 OS=Homo sapiens GN=UBA7 PE=1 SV=2	2.17391	2	2	2	1	1012	High	High	1.06	0.08	243523	229827	0	5.28	2	0.08	0.00799888	0.0282606	0.488727	54	0.0245908	FALSE	1.00556
1570	High	Master Protein	Q96TA2	ATP-dependent zinc metalloprotease YME1L1 OS=Homo sapiens GN=YME1L1 PE=1 SV=2	19.793	13	20	13	1	773	High	High	1.059	0.08	1.59814e+06	1.50913e+06	0	36.35	13	0.08	0.00799888	0.0282606	0.488727	55	0.0245831	FALSE	1.00556
1571	High	Master Protein	Q7Z3B4	Nucleoporin p54 OS=Homo sapiens GN=NUP54 PE=1 SV=2	14.3984	6	6	6	1	507	High	High	1.059	0.08	532903	503037	0	18.57	6	0.08	0.00799888	0.0282606	0.488727	56	0.0245754	FALSE	1.00556
1572	High	Master Protein	Q9BYG5	Partitioning defective 6 homolog beta OS=Homo sapiens GN=PARD6B PE=1 SV=1	14.5161	3	3	3	1	372	High	High	1.059	0.08	265267	250452	0	7.68	3	0.08	0.00799888	0.0282606	0.488727	57	0.0245676	FALSE	1.00556
1573	High	Master Protein	P45877	Peptidyl-prolyl cis-trans isomerase C OS=Homo sapiens GN=PPIC PE=1 SV=1	14.6226	3	6	3	1	212	High	High	1.059	0.08	1.15048e+06	1.08604e+06	0	16.29	3	0.08	0.00799888	0.0282606	0.488727	58	0.0245599	FALSE	1.00556
1574	High	Master Protein	P49407	Beta-arrestin-1 OS=Homo sapiens GN=ARRB1 PE=1 SV=2	4.54545	2	3	2	1	418	High	High	1.059	0.08	222844	210408	0	7.04	2	0.08	0.00799888	0.0282606	0.488727	59	0.0245522	FALSE	1.00556
1575	High	Master Protein	Q9UKN8	General transcription factor 3C polypeptide 4 OS=Homo sapiens GN=GTF3C4 PE=1 SV=2	3.40633	2	2	2	1	822	High	High	1.059	0.08	40328.9	38071.6	0	3.45	2	0.08	0.00799888	0.0282606	0.488727	60	0.0245445	FALSE	1.00556
1576	High	Master Protein	P16615	Sarcoplasmic/endoplasmic reticulum calcium ATPase 2 OS=Homo sapiens GN=ATP2A2 PE=1 SV=1	39.3474	43	135	43	1	1042	High	High	1.058	0.08	2.13025e+07	2.01409e+07	0	378.59	43	0.08	0.00799888	0.0282606	0.488727	61	0.0245368	FALSE	1.00556
1577	High	Master Protein	Q9NZB2	Constitutive coactivator of PPAR-gamma-like protein 1 OS=Homo sapiens GN=FAM120A PE=1 SV=2	12.8801	15	23	15	1	1118	High	High	1.058	0.08	2.12568e+06	2.00876e+06	0	64.85	15	0.08	0.00799888	0.0282606	0.488727	62	0.024529	FALSE	1.00556
1578	High	Master Protein	Q5JRA6	Transport and Golgi organization protein 1 homolog OS=Homo sapiens GN=MIA3 PE=1 SV=1	7.07918	13	16	13	1	1907	High	High	1.058	0.08	723925	684145	0	29	13	0.08	0.00799888	0.0282606	0.488727	63	0.0245213	FALSE	1.00556
1579	High	Master Protein	Q9H3N1	Thioredoxin-related transmembrane protein 1 OS=Homo sapiens GN=TMX1 PE=1 SV=1	23.2143	10	23	10	1	280	High	High	1.058	0.08	4.76182e+06	4.50264e+06	0	50.91	10	0.08	0.00799888	0.0282606	0.488727	64	0.0245136	FALSE	1.00556
1580	High	Master Protein	Q9UL25	Ras-related protein Rab-21 OS=Homo sapiens GN=RAB21 PE=1 SV=3	27.1111	7	11	7	1	225	High	High	1.058	0.08	1.50367e+06	1.42169e+06	0	30.17	7	0.08	0.00799888	0.0282606	0.488727	65	0.0245059	FALSE	1.00556
1581	High	Master Protein	Q8NHU6	Tudor domain-containing protein 7 OS=Homo sapiens GN=TDRD7 PE=1 SV=2	8.19672	7	10	7	1	1098	High	High	1.058	0.08	184001	173908	0	10.98	7	0.08	0.00799888	0.0282606	0.488727	66	0.0244981	FALSE	1.00556
1582	High	Master Protein	Q6P4A7	Sideroflexin-4 OS=Homo sapiens GN=SFXN4 PE=1 SV=1	13.6499	4	8	4	1	337	High	High	1.058	0.08	931552	880661	0	9.44	4	0.08	0.00799888	0.0282606	0.488727	67	0.0244904	FALSE	1.00556
1583	High	Master Protein	O43427	Acidic fibroblast growth factor intracellular-binding protein OS=Homo sapiens GN=FIBP PE=1 SV=3	3.57143	2	4	2	1	364	High	High	1.058	0.08	112353	106228	0	8.38	2	0.08	0.00799888	0.0282606	0.488727	68	0.0244827	FALSE	1.00556
1584	High	Master Protein	P36776	Lon protease homolog, mitochondrial OS=Homo sapiens GN=LONP1 PE=1 SV=2	35.0365	36	75	35	1	959	High	High	1.057	0.08	1.30333e+07	1.23305e+07	1	172.84	36	0.08	0.00799888	0.0282606	0.488727	69	0.024475	FALSE	1.00556
1585	High	Master Protein	P48444	Coatomer subunit delta OS=Homo sapiens GN=ARCN1 PE=1 SV=1	23.8748	13	25	13	1	511	High	High	1.057	0.08	1.88279e+06	1.78152e+06	0	50.31	13	0.08	0.00799888	0.0282606	0.488727	70	0.0244673	FALSE	1.00556
1586	High	Master Protein	P17252	Protein kinase C alpha type OS=Homo sapiens GN=PRKCA PE=1 SV=4	19.7917	12	24	11	1	672	High	High	1.057	0.08	3.01013e+06	2.8483e+06	1	50.24	12	0.08	0.00799888	0.0282606	0.488727	71	0.0244595	FALSE	1.00556
1587	High	Master Protein	P52732	Kinesin-like protein KIF11 OS=Homo sapiens GN=KIF11 PE=1 SV=2	8.14394	8	8	8	1	1056	High	High	1.057	0.08	432626	409371	0	8.7	8	0.08	0.00799888	0.0282606	0.488727	72	0.0244518	FALSE	1.00556
1588	High	Master Protein	Q7Z392	Trafficking protein particle complex subunit 11 OS=Homo sapiens GN=TRAPPC11 PE=1 SV=2	8.82613	7	10	7	1	1133	High	High	1.057	0.08	288507	272827	0	15.77	7	0.08	0.00799888	0.0282606	0.488727	73	0.0244441	FALSE	1.00556
1589	High	Master Protein	Q96PU5	E3 ubiquitin-protein ligase NEDD4-like OS=Homo sapiens GN=NEDD4L PE=1 SV=2	9.12821	8	11	6	1	975	High	High	1.057	0.08	841108	796090	2	17.93	8	0.08	0.00799888	0.0282606	0.488727	74	0.0244364	FALSE	1.00556
1590	High	Master Protein	Q9Y673	Dolichyl-phosphate beta-glucosyltransferase OS=Homo sapiens GN=ALG5 PE=1 SV=1	11.7284	5	6	5	1	324	High	High	1.057	0.08	582843	551154	0	14.99	5	0.08	0.00799888	0.0282606	0.488727	75	0.0244287	FALSE	1.00556
1591	High	Master Protein	Q96TC7	Regulator of microtubule dynamics protein 3 OS=Homo sapiens GN=RMDN3 PE=1 SV=2	7.23404	2	2	2	1	470	High	High	1.057	0.08	129871	122888	0	2.8	2	0.08	0.00799888	0.0282606	0.488727	76	0.0244209	FALSE	1.00556
1592	High	Master Protein	Q15035	Translocating chain-associated membrane protein 2 OS=Homo sapiens GN=TRAM2 PE=1 SV=1	5.13514	2	2	2	1	370	High	High	1.057	0.08	114549	108327	0	2.7	2	0.08	0.00799888	0.0282606	0.488727	77	0.0244132	FALSE	1.00556
1593	High	Master Protein	Q9HBH1	Peptide deformylase, mitochondrial OS=Homo sapiens GN=PDF PE=1 SV=1	8.64198	2	3	2	1	243	High	High	1.057	0.08	208234	197022	0	7.08	2	0.08	0.00799888	0.0282606	0.488727	78	0.0244055	FALSE	1.00556
1594	High	Master Protein	P23470	Receptor-type tyrosine-protein phosphatase gamma OS=Homo sapiens GN=PTPRG PE=1 SV=4	1.24567	2	2	2	1	1445	High	High	1.057	0.08	171410	162099	0	3.96	2	0.08	0.00799888	0.0282606	0.488727	79	0.0243978	FALSE	1.00556
1595	High	Master Protein	Q27J81	Inverted formin-2 OS=Homo sapiens GN=INF2 PE=1 SV=2	8.2466	8	15	7	1	1249	High	High	1.056	0.08	754790	714480	1	43.04	8	0.08	0.00799888	0.0282606	0.488727	80	0.0243901	FALSE	1.00556
1596	High	Master Protein	Q8NBX0	Saccharopine dehydrogenase-like oxidoreductase OS=Homo sapiens GN=SCCPDH PE=1 SV=1	27.2727	6	11	6	1	429	High	High	1.056	0.08	4.26543e+06	4.04101e+06	0	28.82	6	0.08	0.00799888	0.0282606	0.488727	81	0.0243823	FALSE	1.00556
1597	High	Master Protein	Q9BQS8	FYVE and coiled-coil domain-containing protein 1 OS=Homo sapiens GN=FYCO1 PE=1 SV=3	5.41272	7	8	6	1	1478	High	High	1.056	0.08	164339	155588	0	20.17	7	0.08	0.00799888	0.0282606	0.488727	82	0.0243746	FALSE	1.00556
1598	High	Master Protein	Q7Z3D6	D-glutamate cyclase, mitochondrial OS=Homo sapiens GN=C14orf159 PE=1 SV=2	7.14286	4	7	4	1	616	High	High	1.056	0.08	256220	242687	0	9.53	4	0.08	0.00799888	0.0282606	0.488727	83	0.0243669	FALSE	1.00556
1599	High	Master Protein	Q99627	COP9 signalosome complex subunit 8 OS=Homo sapiens GN=COPS8 PE=1 SV=1	17.7033	3	4	3	1	209	High	High	1.056	0.08	537418	508887	0	6.29	3	0.08	0.00799888	0.0282606	0.488727	84	0.0243592	FALSE	1.00556
1600	High	Master Protein	P54687	Branched-chain-amino-acid aminotransferase, cytosolic OS=Homo sapiens GN=BCAT1 PE=1 SV=3	6.21762	2	2	2	1	386	High	High	1.056	0.08	121138	114686	0	2.99	2	0.08	0.00799888	0.0282606	0.488727	85	0.0243515	FALSE	1.00556
1601	High	Master Protein	P49327	Fatty acid synthase OS=Homo sapiens GN=FASN PE=1 SV=3	29.9084	64	155	63	1	2511	High	High	1.055	0.08	1.90337e+07	1.80353e+07	1	428.56	64	0.08	0.00799888	0.0282606	0.488727	86	0.0243437	FALSE	1.00556
1602	High	Master Protein	P20020	Plasma membrane calcium-transporting ATPase 1 OS=Homo sapiens GN=ATP2B1 PE=1 SV=3	26.5501	30	57	17	1	1258	High	High	1.055	0.08	8.31197e+06	7.87761e+06	15	148.51	30	0.08	0.00799888	0.0282606	0.488727	87	0.024336	FALSE	1.00556
1603	High	Master Protein	Q9UBV2	Protein sel-1 homolog 1 OS=Homo sapiens GN=SEL1L PE=1 SV=3	8.06045	7	12	7	1	794	High	High	1.055	0.08	621100	588847	0	24.47	7	0.08	0.00799888	0.0282606	0.488727	88	0.0243283	FALSE	1.00556
1604	High	Master Protein	Q9UBQ0	Vacuolar protein sorting-associated protein 29 OS=Homo sapiens GN=VPS29 PE=1 SV=1	38.4615	6	14	6	1	182	High	High	1.055	0.08	2.15117e+06	2.03821e+06	0	35.52	6	0.08	0.00799888	0.0282606	0.488727	89	0.0243206	FALSE	1.00556
1605	High	Master Protein	O75431	Metaxin-2 OS=Homo sapiens GN=MTX2 PE=1 SV=1	22.8137	4	9	4	1	263	High	High	1.055	0.08	809921	767691	0	27.59	4	0.08	0.00799888	0.0282606	0.488727	90	0.0243128	FALSE	1.00556
1606	High	Master Protein	P16035	Metalloproteinase inhibitor 2 OS=Homo sapiens GN=TIMP2 PE=1 SV=2	13.6364	4	5	4	1	220	High	High	1.055	0.08	773588	733563	0	11.17	4	0.08	0.00799888	0.0282606	0.488727	91	0.0243051	FALSE	1.00556
1607	High	Master Protein	Q92688	Acidic leucine-rich nuclear phosphoprotein 32 family member B OS=Homo sapiens GN=ANP32B PE=1 SV=1	14.741	5	10	3	1	251	High	High	1.055	0.08	691685	655476	2	10.4	5	0.08	0.00799888	0.0282606	0.488727	92	0.0242974	FALSE	1.00556
1608	High	Master Protein	Q10589	Bone marrow stromal antigen 2 OS=Homo sapiens GN=BST2 PE=1 SV=1	18.3333	3	9	3	1	180	High	High	1.055	0.08	735919	697533	0	24.43	3	0.08	0.00799888	0.0282606	0.488727	93	0.0242897	FALSE	1.00556
1609	High	Master Protein	P22694	cAMP-dependent protein kinase catalytic subunit beta OS=Homo sapiens GN=PRKACB PE=1 SV=2	10.8262	3	4	2	1	351	High	High	1.055	0.08	592632	561560	1	11.82	3	0.08	0.00799888	0.0282606	0.488727	94	0.024282	FALSE	1.00556
1610	High	Master Protein	P78406	mRNA export factor OS=Homo sapiens GN=RAE1 PE=1 SV=1	7.6087	2	2	2	1	368	High	High	1.055	0.08	288663	273701	0	5.9	2	0.08	0.00799888	0.0282606	0.488727	95	0.0242742	FALSE	1.00556
1611	High	Master Protein	O15460	Prolyl 4-hydroxylase subunit alpha-2 OS=Homo sapiens GN=P4HA2 PE=1 SV=1	12.1495	7	12	7	1	535	High	High	1.054	0.08	1.15374e+06	1.09413e+06	0	25.32	7	0.08	0.00799888	0.0282606	0.488727	96	0.0242665	FALSE	1.00556
1612	High	Master Protein	Q86WA6	Valacyclovir hydrolase OS=Homo sapiens GN=BPHL PE=1 SV=1	21.6495	7	7	7	1	291	High	High	1.054	0.08	578077	548715	0	12.53	7	0.08	0.00799888	0.0282606	0.488727	97	0.0242588	FALSE	1.00556
1613	High	Master Protein	O60879	Protein diaphanous homolog 2 OS=Homo sapiens GN=DIAPH2 PE=1 SV=1	5.26794	6	7	6	1	1101	High	High	1.054	0.08	643950	610729	0	8.8	6	0.08	0.00799888	0.0282606	0.488727	98	0.0242511	FALSE	1.00556
1614	High	Master Protein	Q8IXI2	Mitochondrial Rho GTPase 1 OS=Homo sapiens GN=RHOT1 PE=1 SV=2	9.87055	5	5	5	1	618	High	High	1.054	0.08	721317	684491	0	11.42	5	0.08	0.00799888	0.0282606	0.488727	99	0.0242434	FALSE	1.00556
1615	High	Master Protein	P51798	H(+)/Cl(-) exchange transporter 7 OS=Homo sapiens GN=CLCN7 PE=1 SV=2	4.47205	4	4	4	1	805	High	High	1.054	0.08	596796	566071	0	7.37	4	0.08	0.00799888	0.0282606	0.488727	100	0.0242356	FALSE	1.00556
[truncated: 1,574 more rows]
