# Supplementary material for: Weakly migratory metastatic breast cancer cells activate fibroblasts via microvesicle-Tg2 to facilitate dissemination and metastasis
Source: eLife journal article supplement (doi:10.7554/elife.74433), 2022-12-06
Supplement: supp [file Source Data Figure 4 - SuppFig2.xlsx]

## Sheet: C
	MV- scrambled					MV- shtg2
	Cell Area	Fn Area	Fn frac			Cell Area	Fn Area	Fn frac
rep1	1467.2	903.225	0.61561		rep1	1329.24	130.149	0.0979126
	1649.72	979.438	0.593698			1242.47	500.272	0.402643
	3567.95	1714.6	0.480556			882.901	186.82	0.211598
	1784.56	836.392	0.468682			1177.59	153.99	0.130767
	1251.85	337.683	0.269747			1302.66	136.793	0.105011
	938.4	0.782	0.000833333			910.26	435.393	0.478317
	1670.05	490.892	0.293939			1033.76	104.354	0.100946
	2206.28	654.261	0.296545			1064.64	102.399	0.0961818
	2283.27	17.979	0.00787423			1145.54	85.984	0.0750595
	3485.88	986.473	0.282991			1343.31	137.966	0.102706
	3465.94	1664.58	0.480266			1523.87	73.477	0.0482172
	4547.78	1690.76	0.371777			586.256	15.633	0.0266658
	2574.84	809.424	0.31436			950.907	16.415	0.0172625
	955.988	114.124	0.119378			1215.5	103.572	0.0852091
	2301.25	272.023	0.118207			480.73	125.85	0.261789
	2512.69	1434.76	0.571006			795.745	114.515	0.143909
	2998.11	1625.49	0.542172			1127.17	244.664	0.21706
	1643.86	828.184	0.503804			2182.83	585.083	0.268039
	2108.57	956.769	0.453753			1085.75	69.96	0.064435
	3134.12	1383.95	0.441576			1395.68	143.437	0.102772
	1355.03	534.665	0.394577			1225.66	375.985	0.30676
	1209.64	461.97	0.381907			646.054	231.766	0.358741
	1463.29	1078.32	0.736913			1414.05	180.567	0.127695
	762.914	184.866	0.242316			1007.97	2.345	0.00232646
	1364.41	435.783	0.319392			1537.55	64.097	0.0416877
	1627.06	546	0.335576			1195.18	313.451	0.262263
rep2	1041.97	321.659	0.308702			803.952	48.855	0.0607686
	1230.36	195.028	0.158514			823.885	234.893	0.285104
	307.98	174.704	0.567258			728.521	40.647	0.0557939
	973.966	118.033	0.121188			687.092	177.049	0.257679
	2074.56	997.026	0.480595			1119.75	41.429	0.0369985
	3026.25	319.705	0.105644			1594.62	211.052	0.132353
	2479.47	236.066	0.0952082			1951.06	289.61	0.148437
	2587.73	592.9	0.229119		rep2	2254.35	699.208	0.31016
	3131.78	299.381	0.0955946			334.947	106.699	0.318555
	1490.26	28.531	0.019145			325.177	42.21	0.129806
	531.929	33.221	0.0624538			610.097	23.45	0.0384365
	2201.98	173.141	0.0786298			702.334	25.795	0.0367275
	1688.03	435.002	0.257699			1252.63	175.877	0.140406
	2558.03	383.802	0.150038			398.654	45.728	0.114706
	2323.92	261.079	0.112344			536.619	19.933	0.0371455
	1265.53	201.672	0.159358			2413.42	30.876	0.0127935
	4256.22	528.803	0.124242			1993.27	48.464	0.0243138
	1557.88	55.108	0.0353738			838.737	5.081	0.00605792
	411.942	177.44	0.43074			636.674	53.936	0.0847153
	921.594	89.502	0.0971165			423.668	42.21	0.0996299
rep3	2944.96	427.576	0.145189			2613.14	473.304	0.181125
	1460.17	445.164	0.304872			1383.17	13.288	0.0096069
	1049.01	496.363	0.473174			866.486	84.421	0.0974292
	861.014	74.65	0.0867001			1138.51	25.795	0.0226568
	2607.67	279.449	0.107164			1920.57	341.201	0.177656
	1663.4	745.327	0.448074			1944.81	578.83	0.297629
	1688.42	120.769	0.0715279			1446.88	642.145	0.443814
	1484.4	257.953	0.173776			1304.22	263.033	0.201678
	802.78	91.456	0.113924			2259.04	312.67	0.138408
	1480.1	362.306	0.244785			704.679	245.055	0.347754
	2977.01	672.631	0.225942			715.623	261.079	0.364828
	1688.03	540.528	0.320213			1780.65	177.831	0.0998684
	2716.32	239.583	0.0882014			1783	188.774	0.105874
	1844.75	720.704	0.390678		rep3	1738.84	4.299	0.00247234
	2946.91	466.269	0.158223			1400.76	32.439	0.0231581
	3786.04	917.686	0.242387			1235.44	74.65	0.060424
						476.431	21.496	0.0451188
						727.739	28.922	0.0397423
						576.094	14.461	0.0251018
						546.781	14.461	0.0264475
						2696.39	188.384	0.0698654
						1081.84	56.281	0.0520235
						880.165	75.041	0.0852579
						1197.92	301.726	0.251876
						1136.94	272.023	0.239258
						1190.88	32.049	0.026912
						1193.23	14.852	0.0124469
						1269.05	41.82	0.0329538
						631.984	125.85	0.199135
						631.202	148.518	0.235294
						742.2	15.633	0.0210631
						1382.78	11.725	0.00847928
						1176.81	1.563	0.00132817
						896.971	8.598	0.00958559
						2037.04	24.232	0.0118957
						1124.83	11.725	0.0104238

## Sheet: E
	MV- scrambled								MV- shtg2
	Replicate 1								Replicate 1
Cell #	m2	um2	N	nN	Pa	kPa		Cell #	m2	um2	N	nN	Pa	kPa
3	1.594e-09	1594	6.225e-07	622.5	390.527	0.390527		3	1.697e-09	1697	1.35e-06	1350	795.522	0.795522
7	2.074e-09	2074	9.414e-07	941.4	453.905	0.453905		4	1.082e-09	1082	3.223e-06	3223	2978.74	2.97874
8	2.24e-09	2240	2.003e-05	20030	8941.96	8.94196		13	2.549e-09	2549	1.894e-06	1894	743.036	0.743036
9	2.234e-09	2234	7.482e-07	748.2	334.915	0.334915		15	8.612e-10	861.2	4.808e-07	480.8	558.291	0.558291
10	2.333e-09	2333	7.552e-06	7552	3237.03	3.23703		16	1.32e-09	1320	3.119e-07	311.9	236.288	0.236288
11	1.193e-09	1193	1.931e-06	1931	1618.61	1.61861		17	6.389e-10	638.9	6.125e-07	612.5	958.679	0.958679
12	1.35e-09	1350	5.693e-07	569.3	421.704	0.421704		18	1.236e-09	1236	1.042e-06	1042	843.042	0.843042
14	1.78e-09	1780	2.292e-07	229.2	128.764	0.128764		Replicate 2
16	2.55e-09	2550	6.336e-06	6336	2484.71	2.48471		Cell #	m2	um2	N	nN	Pa	kPa
17	2.869e-09	2869	7.6e-06	7600	2649.01	2.64901		1	1.804e-09	1804	9.732e-07	973.2	539.468	0.539468
18	4.332e-09	4332	1.726e-05	17260	3984.3	3.9843		2	1.041e-09	1041	7.013e-07	701.3	673.679	0.673679
19	2.357e-09	2357	3.51e-06	3510	1489.18	1.48918		3	7.25e-10	725	5.284e-07	528.4	728.828	0.728828
20	1.277e-09	1277	4.443e-06	4443	3479.25	3.47925		4	1.641e-09	1641	1.134e-06	1134	691.042	0.691042
	Replicate 2							5	2.271e-09	2271	1.152e-06	1152	507.266	0.507266
Cell #	m2	um2	N	nN	Pa	kPa		6	9.097e-10	909.7	3.77e-06	3770	4144.22	4.14422
2	2.005e-09	2005	1.763e-06	1763	879.302	0.879302		7	1.677e-09	1677	7.626e-07	762.6	454.741	0.454741
3	1.504e-09	1504	9.212e-07	921.2	612.5	0.6125		8	1.096e-09	1096	3.217e-07	321.7	293.522	0.293522
4	1.56e-09	1560	4.484e-07	448.4	287.436	0.287436		9	1.121e-09	1121	7.351e-07	735.1	655.754	0.655754
5	2.35e-09	2350	2.667e-06	2667	1134.89	1.13489		10	1.824e-09	1824	3.132e-06	3132	1717.11	1.71711
6	1.669e-09	1669	4.936e-07	493.6	295.746	0.295746		11	7.033e-10	703.3	2.026e-08	20.26	28.8071	0.0288071
7	1.647e-09	1647	2.756e-07	275.6	167.335	0.167335		12	6.412e-10	641.2	2.693e-07	269.3	419.994	0.419994
8	1.782e-09	1782	9.575e-07	957.5	537.318	0.537318		13	1.066e-09	1066	6.257e-07	625.7	586.961	0.586961
9	2.392e-09	2392	1.204e-06	1204	503.344	0.503344		14	2.087e-09	2087	2.075e-06	2075	994.25	0.99425
10	1.473e-09	1473	8.083e-07	808.3	548.744	0.548744		16	1.684e-09	1684	2.758e-06	2758	1637.77	1.63777
11	1.61e-09	1610	1.63e-06	1630	1012.42	1.01242		21	8.003e-10	800.3	4.025e-07	402.5	502.936	0.502936
12	4.66e-09	4660	5.892e-06	5892	1264.38	1.26438		22	6.958e-10	695.8	4.168e-07	416.8	599.023	0.599023
13	2.246e-09	2246	1.3e-06	1300	578.807	0.578807		23	9.427e-10	942.7	6.442e-07	644.2	683.356	0.683356
14	1.122e-09	1122	1.227e-06	1227	1093.58	1.09358			Replicate 3
15	1.161e-09	1161	2.996e-07	299.6	258.053	0.258053		Cell #	m2	um2	N	nN	Pa	kPa
16	2.518e-09	2518	9.297e-07	929.7	369.222	0.369222		3	1.694e-09	1694	8.798e-07	879.8	519.362	0.519362
17	1.298e-09	1298	7.209e-07	720.9	555.393	0.555393		4	1.944e-09	1944	7.162e-07	716.2	368.416	0.368416
18	1.772e-09	1772	6.901e-07	690.1	389.447	0.389447		7	2.549e-09	2549	2.401e-06	2401	941.938	0.941938
19	1.863e-09	1863	1.069e-06	1069	573.806	0.573806		9	1.97e-09	1970	6.563e-07	656.3	333.147	0.333147
20	1.444e-09	1444	6.982e-07	698.2	483.518	0.483518		14	1.591e-09	1591	9.279e-08	92.79	58.3218	0.0583218
21	1.539e-09	1539	1.275e-06	1275	828.46	0.82846		15	1.495e-09	1495	2.613e-07	261.3	174.783	0.174783
22	1.265e-09	1265	1.612e-06	1612	1274.31	1.27431		21	9.108e-10	910.8	2.912e-07	291.2	319.719	0.319719
23	1.387e-09	1387	6.147e-07	614.7	443.187	0.443187		23	9.826e-10	982.6	2.164e-07	216.4	220.232	0.220232
24	1.88e-09	1880	1.318e-06	1318	701.064	0.701064		24	1.759e-09	1759	1.187e-06	1187	674.815	0.674815
	Replicate 3							25	7.074e-10	707.4	6.514e-07	651.4	920.837	0.920837
Cell #	m2	um2	N	nN	Pa	kPa
3	8.699e-10	869.9	2.961e-06	2961	3403.84	3.40384
4	2.292e-09	2292	8.933e-06	8933	3897.47	3.89747
5	1.095e-09	1095	9.858e-07	985.8	900.274	0.900274
6	1.558e-09	1558	9.877e-07	987.7	633.954	0.633954
8	3.501e-09	3501	1.185e-06	1185	338.475	0.338475
9	1.502e-09	1502	6.892e-07	689.2	458.855	0.458855
10	1.592e-09	1592	3.847e-07	384.7	241.646	0.241646
11	3.443e-09	3443	5.484e-06	5484	1592.8	1.5928
13	2.376e-09	2376	6.772e-06	6772	2850.17	2.85017
14	1.244e-09	1244	2.251e-06	2251	1809.49	1.80949
17	2.401e-09	2401	7.311e-07	731.1	304.498	0.304498
18	1.521e-09	1521	1.017e-06	1017	668.639	0.668639
19	1.275e-09	1275	2.263e-06	2263	1774.9	1.7749
20	6.239e-09	6239	1.838e-05	18380	2945.98	2.94598
21	1.667e-09	1667	1.19e-06	1190	713.857	0.713857
22	2.226e-09	2226	5.685e-06	5685	2553.91	2.55391
23	1.639e-09	1639	2.568e-06	2568	1566.81	1.56681
24	1.662e-09	1662	3.617e-06	3617	2176.29	2.17629
25	3.092e-09	3092	1.273e-05	12730	4117.08	4.11708
26	1.302e-09	1302	2.208e-06	2208	1695.85	1.69585
27	1.776e-09	1776	1.75e-06	1750	985.36	0.98536

## Sheet: G
Maximum cancer cell migration distance from spheroid core after 48 hours
MDA- (scr) + 3t3	MDA- (scr) +3T3 +MV-(scr)	MDA- (shtg2) + 3t3	MDA- (shtg2) + 3t3 +MV-(shtg2)	MDA- (shtg2) + 3t3 +MV-(scr)
800.194	1139.82	884.452	965.423	678.91
735.313	1102.45	871.995	1040.16	878.223
1012.14	1183.42	1027.71	990.337	554.34
657.456	1177.19	984.108	1164.74	591.711
1170.96	1295.54	959.194	890.681	1245.71
641.539	1781.36	971.651	1133.59	766.11
722.51	1046.39	1040.16	716.281	809.709
1096.22	1189.61	1015.25	454.683	479.597
934.281	977.881	579.254	566.797	298.97
678.911	672.682	896.909	834.625	498.283
597.939	971.651	940.509	1146.05	442.226
822.166	597.939	747.424	741.196	485.826
604.168	734.967	1177.19	784.795	604.168
803.481	523.197	815.938	666.453	548.111
678.911	404.855	728.738	541.882	766.11
940.509	996.565	822.166	423.54	1027.71
1058.85	928.052	660.225	653.996	1114.91
1463.71	896.909	485.826	529.425	1002.79
734.967	766.11	554.34	616.625	1170.96
822.166	1314.22	535.654	492.054	498.283
840.852	1513.53	585.482	853.309	1133.59
685.139	1195.88	728.738	616.625	1139.82
697.596	1233.25	691.367	529.425	871.995
		498.283	523.197	803.481
		734.967	342.569	797.252
		759.881	597.939	666.453
		635.31	878.223	909.366
		560.568	647.768	896.909
		529.425	747.424	610.396
		554.34	573.025	859.538
		454.683	460.912	710.053
		535.654	548.111	1108.68
		697.596	541.882	759.881
		641.539	685.139	878.223
		498.283	498.283	990.337
		535.654	728.738	940.509
		342.569	685.139	753.653
		616.625	566.797
		554.34	529.425
		516.968	535.654
		840.852	573.025
		541.882	1065.08
		840.852	710.053
		510.74	840.852
		952.966	342.569
		703.824	342.569
		697.596	261.598
		177.958	442.226
		193.847	597.939
		355.916	348.798
		241.515	330.112
		479.597	560.568
		473.369	367.484
		298.715	298.97
		647.768	230.456
		448.454	435.997
		585.482	460.912
		460.912	317.655
		635.31	361.255
		205.542	255.37
		548.111
		323.884
		510.74
		822.166
		734.967
		1245.71
		202.427
		622.853
		541.882
		429.769
		641.539
		467.14
		840.852
		778.567
		784.795
		921.823
		747.434
		678.91
		915.595
		591.711
		722.51
		660.225
		635.31
