# Supplementary material for: Weakly migratory metastatic breast cancer cells activate fibroblasts via microvesicle-Tg2 to facilitate dissemination and metastasis
Source: eLife journal article supplement (doi:10.7554/elife.74433), 2022-12-06
Supplement: supp [file Source Data Figure 4 - SuppFig3.xlsx]

## Sheet: B
INV MV Area
	Ctrl	Cell	Area		INV	Cell	Area		INV+Tg2	Cell	Area		NON	Cell	Area
	1	E85a_Ctrl_10.lsm:Ch1-T2	524.699		1	E85a_INV_10.lsm:Ch1-T2	1548.5		1	E85a_INV+Tg_10.lsm:Ch1-T2	1215.7		1	E85a_NON_15.lsm:Ch1-T2	1123.56
	2	E85a_Ctrl_9.lsm:Ch1-T2	479.655		2	E85a_INV_10.lsm:Ch1-T2	461.09		2	E85a_INV+Tg_9.lsm:Ch1-T2	990.577		2	E85a_NON_15.lsm:Ch1-T2	1504.43
	3	E85a_Ctrl_9.lsm:Ch1-T2	258.637		3	E85a_INV_10.lsm:Ch1-T2	729.4		3	E85a_INV+Tg_9.lsm:Ch1-T2	628.564		3	E85a_NON_15.lsm:Ch1-T2	544.729
	4	E85a_Ctrl_8.lsm:Ch1-T2	600.033		4	E85a_INV_9.lsm:Ch1-T2	488.84		4	E85a_INV+Tg_9.lsm:Ch1-T2	567.593		4	E85a_NON_14.lsm:Ch1-T2	3301.01
	5	E85a_Ctrl_8.lsm:Ch1-T2	590.75		5	E85a_INV_9.lsm:Ch1-T2	1541.85		5	E85a_INV+Tg_8.lsm:Ch1-T2	1201.24		5	E85a_NON_13.lsm:Ch1-T2	1040.21
	6	E85a_Ctrl_8.lsm:Ch1-T2	464.119		6	E85a_INV_9.lsm:Ch1-T2	619.77		6	E85a_INV+Tg_7.lsm:Ch1-T2	3906.71		6	E85a_NON_13.lsm:Ch1-T2	1222.34
	7	E85a_Ctrl_8.lsm:Ch1-T2	735.165		7	E85a_INV_8.lsm:Ch1-T2	712.789		7	E85a_INV+Tg_7.lsm:Ch1-T2	751.091		7	E85a_NON_13.lsm:Ch1-T2	1885.5
	8	E85a_Ctrl_7.lsm:Ch1-T2	783.531		8	E85a_INV_8.lsm:Ch1-T2	1757.69		8	E85a_INV+Tg_6.lsm:Ch1-T2	2298.12		8	E85a_NON_12.lsm:Ch1-T2	1627.93
	9	E85a_Ctrl_7.lsm:Ch1-T2	1551.33		9	E85a_INV_7.lsm:Ch1-T2	931.072		9	E85a_INV+Tg_5.lsm:Ch1-T2	2056.59		9	E85a_NON_12.lsm:Ch1-T2	1059.95
	10	E85a_Ctrl_6.lsm:Ch1-T2	720.801		10	E85a_INV_6.lsm:Ch1-T2	662.567		10	E85a_INV+Tg_5.lsm:Ch1-T2	678.689		10	E85a_NON_11.lsm:Ch1-T2	3439.27
	11	E85a_Ctrl_6.lsm:Ch1-T2	692.954		11	E85a_INV_6.lsm:Ch1-T2	517.566		11	E85a_INV+Tg_4.lsm:Ch1-T2	620.943		11	E85a_NON_10.lsm:Ch1-T2	838.834
	12	E85a_Ctrl_5.lsm:Ch1-T2	721.095		12	E85a_INV_5.lsm:Ch1-T2	471.35		12	E85a_INV+Tg_4.lsm:Ch1-T2	987.255		12	E85a_NON_10.lsm:Ch1-T2	978.265
	13	E85a_Ctrl_5.lsm:Ch1-T2	425.915		13	E85a_INV_5.lsm:Ch1-T2	193.562		13	E85a_INV+Tg_4.lsm:Ch1-T2	1189.71		13	E85a_NON_9.lsm:Ch1-T2	1124.05
	14	E85a_Ctrl_4.lsm:Ch1-T2	669.797		14	E85a_INV_5.lsm:Ch1-T2	804.831		14	E85a_INV+Tg_3.lsm:Ch1-T2	1979.39		14	E85a_NON_8.lsm:Ch1-T2	2060.98
	15	E85a_Ctrl_4.lsm:Ch1-T2	1026.73		15	E85a_INV_5.lsm:Ch1-T2	582.25		15	E85a_INV+Tg_2.lsm:Ch1-T2	4945.16		15	E85a_NON_8.lsm:Ch1-T2	1164.3
	16	E85a_Ctrl_3.lsm:Ch1-T2	672.533		16	E85a_INV_4.lsm:Ch1-T2	548.051		16	E85a_INV+Tg_2.lsm:Ch1-T2	591.044		16	E85a_NON_7.lsm:Ch1-T2	752.166
	17	E85a_Ctrl_3.lsm:Ch1-T2	774.053		17	E85a_INV_3.lsm:Ch1-T2	925.307		17	E85a_INV+Tg_1.lsm:Ch1-T2	789.296		17	E85a_NON_7.lsm:Ch1-T2	1066.3
	18	E85a_Ctrl_2.lsm:Ch1-T2	975.334		18	E85a_INV_3.lsm:Ch1-T2	1001.33		18	E85a_INV+Tg_1.lsm:Ch1-T2	711.617		18	E85a_NON_6.lsm:Ch1-T2	1184.82
	19	E85a_Ctrl_1.lsm:Ch1-T2	826.718		19	E85a_INV_2.lsm:Ch1-T2	780.99		19	E85a_INV+Tg_1.lsm:Ch1-T2	797.699		19	E85a_NON_5.lsm:Ch1-T2	1164.89
	20	E85a_Ctrl_1.lsm:Ch1-T2	564.467		20	E85a_INV_1.lsm:Ch1-T2	995.853						20	E85a_NON_4.lsm:Ch1-T2	1282.43
					21	E85a_INV_1.lsm:Ch1-T2	538.867						21	E85a_NON_3.lsm:Ch1-T2	1512.83
													22	E85a_NON_2.lsm:Ch1-T2	1495.93
													23	E85a_NON_1.lsm:Ch1-T2	592.021
													24	E85a_NON_1.lsm:Ch1-T2	1028.78
	Ctrl	Cell	Area		INV	Cell	Area		INV+Tg2	Cell	Area		NON	Cell	Area
	1	E85b_Ctrl_9.lsm:Ch1-T2	897.655		1	E85b_INV_9.lsm:Ch1-T2	771.806		1	E85b_INV+Tg_10.lsm:Ch1-T2	824.276		1	E85b_NON_9.lsm:Ch1-T2	1459.09
	2	E85b_Ctrl_9.lsm:Ch1-T2	484.247		2	E85b_INV_9.lsm:Ch1-T2	624.851		2	E85b_INV+Tg_10.lsm:Ch1-T2	1397.73		2	E85b_NON_8.lsm:Ch1-T2	2046.81
	3	E85b_Ctrl_8.lsm:Ch1-T2	938.205		3	E85b_INV_8.lsm:Ch1-T2	778.743		3	E85b_INV+Tg_9.lsm:Ch1-T2	926.968		3	E85b_NON_7.lsm:Ch1-T2	1153.26
	4	E85b_Ctrl_8.lsm:Ch1-T2	503.789		4	E85b_INV_8.lsm:Ch1-T2	1425.29		4	E85b_INV+Tg_9.lsm:Ch1-T2	1407.11		4	E85b_NON_7.lsm:Ch1-T2	1004.35
	5	E85b_Ctrl_8.lsm:Ch1-T2	732.429		5	E85b_INV_7.lsm:Ch1-T2	689.925		5	E85b_INV+Tg_8.lsm:Ch1-T2	857.692		5	E85b_NON_7.lsm:Ch1-T2	613.81
	6	E85b_Ctrl_7.lsm:Ch1-T2	1250.87		6	E85b_INV_7.lsm:Ch1-T2	1228.3		6	E85b_INV+Tg_8.lsm:Ch1-T2	1155.32		6	E85b_NON_5.lsm:Ch1-T2	1163.03
	7	E85b_Ctrl_6.lsm:Ch1-T2	1002.2		7	E85b_INV_6.lsm:Ch1-T2	546.39		7	E85b_INV+Tg_7.lsm:Ch1-T2	1602.53		7	E85b_NON_6.lsm:Ch1-T2	959.798
	8	E85b_Ctrl_5.lsm:Ch1-T2	372.859		8	E85b_INV_6.lsm:Ch1-T2	512.388		8	E85b_INV+Tg_6.lsm:Ch1-T2	1467.4		8	E85b_NON_6.lsm:Ch1-T2	1205.93
	9	E85b_Ctrl_5.lsm:Ch1-T2	650.255		9	E85b_INV_6.lsm:Ch1-T2	318.239		9	E85b_INV+Tg_5.lsm:Ch1-T2	717.284		9	E85b_NON_4.lsm:Ch1-T2	2098.99
	10	E85b_Ctrl_4.lsm:Ch1-T2	348.236		10	E85b_INV_5.lsm:Ch1-T2	1094.73		10	E85b_INV+Tg_5.lsm:Ch1-T2	657.095		10	E85b_NON_4.lsm:Ch1-T2	855.836
	11	E85b_Ctrl_4.lsm:Ch1-T2	492.65		11	E85b_INV_4.lsm:Ch1-T2	712.496		11	E85b_INV+Tg_4.lsm:Ch1-T2	2551.09		11	E85b_NON_4.lsm:Ch1-T2	813.821
	12	E85b_Ctrl_3.lsm:Ch1-T2	530.464		12	E85b_INV_3.lsm:Ch1-T2	1146.62		12	E85b_INV+Tg_3.lsm:Ch1-T2	924.818		12	E85b_NON_3.lsm:Ch1-T2	2007.63
	13	E85b_Ctrl_3.lsm:Ch1-T2	615.959		13	E85b_INV_3.lsm:Ch1-T2	896.287		13	E85b_INV+Tg_3.lsm:Ch1-T2	816.263		13	E85b_NON_2.lsm:Ch1-T2	1433.3
	14	E85b_Ctrl_2.lsm:Ch1-T2	502.323		14	E85b_INV_2.lsm:Ch1-T2	714.841		14	E85b_INV+Tg_2.lsm:Ch1-T2	442.037		14	E85b_NON_1.lsm:Ch1-T2	1632.82
	15	E85b_Ctrl_2.lsm:Ch1-T2	593.193		15	E85b_INV_2.lsm:Ch1-T2	991.652		15	E85b_INV+Tg_2.lsm:Ch1-T2	2081.99
	16	E85b_Ctrl_2.lsm:Ch1-T2	434.513		16	E85b_INV_2.lsm:Ch1-T2	287.168		16	E85b_INV+Tg_1.lsm:Ch1-T2	2117.85
	17	E85b_Ctrl_1.lsm:Ch1-T2	357.323		17	E85b_INV_1.lsm:Ch1-T2	1050.08		17	E85b_INV+Tg_11.lsm:Ch1-T2	2317.18
	18	E85b_Ctrl_1.lsm:Ch1-T2	369.732		18	E85b_INV_10.lsm:Ch1-T2	1433.39
	19	E85b_Ctrl_1.lsm:Ch1-T2	551.569
	Ctrl	Cell	Area		INV	Cell	Area		INV+Tg2	Cell	Area		NON	Cell	Area
	1	E85c_Ctrl_9..czi:c:1/2 - E85c_Ctrl_9..czi #1	719.298		1	E85c_INVMV_10czi.czi:c:1/2 - E85c_INVMV_10czi.czi #1	1054.76		1	E85c_INVTg2MV_10.czi:c:1/2 - E85c_INVTg2MV_10.czi #1	512.881		1	E85c_NONMV_10.czi:c:1/2 - E85c_NONMV_10.czi #1	760.368
	2	E85c_Ctrl_9..czi:c:1/2 - E85c_Ctrl_9..czi #1	394.344		2	E85c_INVMV_9.czi:c:1/2 - E85c_INVMV_9.czi #1	513.659		2	E85c_INVTg2MV_10.czi:c:1/2 - E85c_INVTg2MV_10.czi #1	1446.77		2	E85c_NONMV_10.czi:c:1/2 - E85c_NONMV_10.czi #1	849.222
	3	E85c_Ctrl_9..czi:c:1/2 - E85c_Ctrl_9..czi #1	329.918		3	E85c_INVMV_9.czi:c:1/2 - E85c_INVMV_9.czi #1	1627.98		3	E85c_INVTg2MV_9.czi:c:1/2 - E85c_INVTg2MV_9.czi #1	724.359		3	E85c_NONMV_10.czi:c:1/2 - E85c_NONMV_10.czi #1	1799.95
	4	E85c_Ctrl_8.czi:c:1/2 - E85c_Ctrl_8.czi #1	395.901		4	E85c_INVMV_9.czi:c:1/2 - E85c_INVMV_9.czi #1	1002.5		4	E85c_INVTg2MV_9.czi:c:1/2 - E85c_INVTg2MV_9.czi #1	1069.56		4	E85c_NONMV_9.czi:c:1/2 - E85c_NONMV_9.czi #1	1355
	5	E85c_Ctrl_8.czi:c:1/2 - E85c_Ctrl_8.czi #1	366.413		5	E85c_INVMV_8.czi:c:1/2 - E85c_INVMV_8.czi #1	440.961		5	E85c_INVTg2MV_9.czi:c:1/2 - E85c_INVTg2MV_9.czi #1	682.998		5	E85c_NONMV_9.czi:c:1/2 - E85c_NONMV_9.czi #1	1192.76
	6	E85c_Ctrl_8.czi:c:1/2 - E85c_Ctrl_8.czi #1	781.097		6	E85c_INVMV_8.czi:c:1/2 - E85c_INVMV_8.czi #1	210.116		6	E85c_INVTg2MV_8.czi:c:1/2 - E85c_INVTg2MV_8.czi #1	486.994		6	E85c_NONMV_8.czi:c:1/2 - E85c_NONMV_8.czi #1	648.449
	7	E85c_Ctrl_8.czi:c:1/2 - E85c_Ctrl_8.czi #1	249.433		7	E85c_INVMV_8.czi:c:1/2 - E85c_INVMV_8.czi #1	273.082		7	E85c_INVTg2MV_7.czi:c:1/2 - E85c_INVTg2MV_7.czi #1	1970.07		7	E85c_NONMV_8.czi:c:1/2 - E85c_NONMV_8.czi #1	965.325
	8	E85c_Ctrl_8.czi:c:1/2 - E85c_Ctrl_8.czi #1	331.377		8	E85c_INVMV_7.czi:c:1/2 - E85c_INVMV_7.czi #1	840.755		8	E85c_INVTg2MV_7.czi:c:1/2 - E85c_INVTg2MV_7.czi #1	359.017		8	E85c_NONMV_8.czi:c:1/2 - E85c_NONMV_8.czi #1	371.182
	9	E85c_Ctrl_7.czi:c:1/2 - E85c_Ctrl_7.czi #1	987.612		9	E85c_INVMV_7.czi:c:1/2 - E85c_INVMV_7.czi #1	664.02		9	E85c_INVTg2MV_6.czi:c:1/2 - E85c_INVTg2MV_6.czi #1	880.17		9	E85c_NONMV_7.czi:c:1/2 - E85c_NONMV_7.czi #1	2330.15
	10	E85c_Ctrl_7.czi:c:1/2 - E85c_Ctrl_7.czi #1	269.384		10	E85c_INVMV_6.czi:c:1/2 - E85c_INVMV_6.czi #1	1216.61		10	E85c_INVTg2MV_6.czi:c:1/2 - E85c_INVTg2MV_6.czi #1	574.485		10	E85c_NONMV_7.czi:c:1/2 - E85c_NONMV_7.czi #1	2564.7
	11	E85c_Ctrl_7.czi:c:1/2 - E85c_Ctrl_7.czi #1	341.207		11	E85c_INVMV_6.czi:c:1/2 - E85c_INVMV_6.czi #1	1833.72		11	E85c_INVTg2MV_5.czi:c:1/2 - E85c_INVTg2MV_5.czi #1	1282.49		11	E85c_NONMV_6.czi:c:1/2 - E85c_NONMV_6.czi #1	2470
	12	E85c_Ctrl_6.czi:c:1/2 - E85c_Ctrl_6.czi #1	879.002		12	E85c_INVMV_6.czi:c:1/2 - E85c_INVMV_6.czi #1	673.071		12	E85c_INVTg2MV_4.czi:c:1/2 - E85c_INVTg2MV_4.czi #1	942.747		12	E85c_NONMV_6.czi:c:1/2 - E85c_NONMV_6.czi #1	1943.2
	13	E85c_Ctrl_6.czi:c:1/2 - E85c_Ctrl_6.czi #1	668.01		13	E85c_INVMV_5.czi:c:1/2 - E85c_INVMV_5.czi #1	369.333		13	E85c_INVTg2MV_4.czi:c:1/2 - E85c_INVTg2MV_4.czi #1	593.754		13	E85c_NONMV_5.czi:c:1/2 - E85c_NONMV_5.czi #1	1505.46
	14	E85c_Ctrl_5.czi:c:1/2 - E85c_Ctrl_5.czi #1	262.085		14	E85c_INVMV_4.czi:c:1/2 - E85c_INVMV_4.czi #1	574.29		14	E85c_INVTg2MV_3.czi:c:1/2 - E85c_INVTg2MV_3.czi #1	1199.77		14	E85c_NONMV_4.czi:c:1/2 - E85c_NONMV_4.czi #1	1592.36
	15	E85c_Ctrl_5.czi:c:1/2 - E85c_Ctrl_5.czi #1	497.504		15	E85c_INVMV_3.czi:c:1/2 - E85c_INVMV_3.czi #1	357.362		15	E85c_INVTg2MV_3.czi:c:1/2 - E85c_INVTg2MV_3.czi #1	908.782		15	E85c_NONMV_3.czi:c:1/2 - E85c_NONMV_3.czi #1	2597.49
	16	E85c_Ctrl_5.czi:c:1/2 - E85c_Ctrl_5.czi #1	670.249		16	E85c_INVMV_2.czi:c:1/2 - E85c_INVMV_2.czi #1	544.997		16	E85c_INVTg2MV_2.czi:c:1/2 - E85c_INVTg2MV_2.czi #1	616.43		16	E85c_NONMV_3.czi:c:1/2 - E85c_NONMV_3.czi #1	865.377
	17	E85c_Ctrl_5.czi:c:1/2 - E85c_Ctrl_5.czi #1	659.057		17	E85c_INVMV_1.czi:c:1/2 - E85c_INVMV_1.czi #1	648.157		17	E85c_INVTg2MV_2.czi:c:1/2 - E85c_INVTg2MV_2.czi #1	882.311		17	E85c_NONMV_2.czi:c:1/2 - E85c_NONMV_2.czi #1	1103.23
	18	E85c_Ctrl_5.czi:c:1/2 - E85c_Ctrl_5.czi #1	607.379		18	E85c_INVMV_1.czi:c:1/2 - E85c_INVMV_1.czi #1	1302.25		18	E85c_INVTg2MV_2.czi:c:1/2 - E85c_INVTg2MV_2.czi #1	1019.92		18	E85c_NONMV_2.czi:c:1/2 - E85c_NONMV_2.czi #1	2338.43
	19	E85c_Ctrl_4.czi:c:1/2 - E85c_Ctrl_4.czi #1	299.164						19	E85c_INVTg2MV_1.czi:c:1/2 - E85c_INVTg2MV_1.czi #1	924.548		19	E85c_NONMV_1.czi:c:1/2 - E85c_NONMV_1.czi #1	2868.92
	20	E85c_Ctrl_4.czi:c:1/2 - E85c_Ctrl_4.czi #1	267.632						20	E85c_INVTg2MV_1.czi:c:1/2 - E85c_INVTg2MV_1.czi #1	797.447		20	E85c_NONMV_1.czi:c:1/2 - E85c_NONMV_1.czi #1	766.888
	21	E85c_Ctrl_4.czi:c:1/2 - E85c_Ctrl_4.czi #1	1192.28										21	E85c_NONMV_1.czi:c:1/2 - E85c_NONMV_1.czi #1	1127.46
	22	E85c_Ctrl_3.czi:c:1/2 - E85c_Ctrl_3.czi #1	464.512										22	E85c_NONMV_1.czi:c:1/2 - E85c_NONMV_1.czi #1	243.789
	23	E85c_Ctrl_3.czi:c:1/2 - E85c_Ctrl_3.czi #1	1390.03										23	E85c_NONMV_1.czi:c:1/2 - E85c_NONMV_1.czi #1	2234.68
	24	E85c_Ctrl_2.czi:c:1/2 - E85c_Ctrl_2.czi #1	415.755										24	E85c_NONMV_1.czi:c:1/2 - E85c_NONMV_1.czi #1	1068.68
	25	E85c_Ctrl_2.czi:c:1/2 - E85c_Ctrl_2.czi #1	297.218										25	E85c_NONMV_1.czi:c:1/2 - E85c_NONMV_1.czi #1	1336.6
	26	E85c_Ctrl_2.czi:c:1/2 - E85c_Ctrl_2.czi #1	959.875										26	E85c_NONMV_1.czi:c:1/2 - E85c_NONMV_1.czi #1	1499.03
	27	E85c_Ctrl_1.czi:c:1/2 - E85c_Ctrl_1.czi #1	359.309
	28	E85c_Ctrl_1.czi:c:1/2 - E85c_Ctrl_1.czi #1	307.631
	29	E85c_Ctrl_10..czi:c:1/2 - E85c_Ctrl_10..czi #1	274.931
	30	E85c_Ctrl_10..czi:c:1/2 - E85c_Ctrl_10..czi #1	1186.54
	31	E85c_Ctrl_10..czi:c:1/2 - E85c_Ctrl_10..czi #1	909.95

## Sheet: C
INV mV Traction Force
INV Tg2							INV							Ctrl2
Cell #	Force (N)	Force (nN)	Area (m2)	Area (um2)	kPa		Cell #	Force (N)	Force (nN)	Area (m2)	Area (um2)	kPa		Cell #	Force (N)	Force (nN)	Area (m2)	Area (um2)	kPa
1	2.77e-07	277	2.245e-09	2245	0.123385		1	1.479e-06	1479	1.285e-09	1285	1.15097		1	1.068e-07	106.8	1.076e-09	1076	0.0992565
3	4.504e-06	4504	2.086e-09	2086	2.15916		3	1.036e-06	1036	1.026e-09	1026	1.00975		2	7.11e-08	71.1	8.765e-10	876.5	0.0811181
4	6.322e-07	632.2	1.868e-09	1868	0.338437		4	8.752e-07	875.2	8.689e-10	868.9	1.00725		3	2.436e-07	243.6	7.544e-10	754.4	0.322906
5	1.592e-06	1592	3.165e-09	3165	0.503002		6	1.053e-06	1053	5.054e-10	505.4	2.0835		4	3.728e-07	372.8	7.993e-10	799.3	0.466408
6	5.542e-07	554.2	2.676e-09	2676	0.2071		7	4.191e-07	419.1	8.897e-10	889.7	0.471058		5	9.33e-08	93.3	4.833e-10	483.3	0.193048
8	6.982e-07	698.2	1.103e-09	1103	0.633001		8	2.23e-08	22.3	9.462e-10	946.2	0.023568		6	3.544e-07	354.4	9.527e-10	952.7	0.371995
9	1.817e-07	181.7	1.166e-09	1166	0.155832		9	2.767e-06	2767	1.846e-09	1846	1.49892		7	5.052e-07	505.2	1.051e-09	1051	0.480685
13	4.805e-07	480.5	2.695e-09	2695	0.178293		10	1.935e-07	193.5	7.494e-10	749.4	0.258207		8	6.442e-07	644.2	2.009e-09	2009	0.320657
15	1.445e-06	1445	3.226e-09	3226	0.447923		11	4.634e-06	4634	8.492e-10	849.2	5.4569		9	6.846e-07	684.6	1.69e-09	1690	0.405089
							12	7.796e-07	779.6	2.201e-09	2201	0.354203		10	1.05e-06	1050	1.396e-09	1396	0.752149
							13	2.094e-07	209.4	1.198e-09	1198	0.174791		11	1.02e-07	102	8.043e-10	804.3	0.126818
							15	1.029e-07	102.9	1.002e-09	1002	0.102695		12	1.212e-08	12.12	5.384e-10	538.4	0.0225111
							16	1.393e-06	1393	1.154e-09	1154	1.20711		14	1.547e-07	154.7	8.305e-10	830.5	0.186273
							17	1.238e-06	1238	1.492e-09	1492	0.829759		15	9.644e-08	96.44	6.01e-10	601	0.160466
							19	9.358e-07	935.8	6.249e-10	624.9	1.49752		17	4.129e-06	4129	1.247e-09	1247	3.31115
							20	1.122e-07	112.2	5.358e-10	535.8	0.209406		19	5.228e-07	522.8	3.051e-09	3051	0.171354
							21	4.971e-07	497.1	8.918e-10	891.8	0.557412		20	1.989e-07	198.9	1.302e-09	1302	0.152765
							22	1.444e-06	1444	4.911e-10	491.1	2.94034		22	2.833e-07	283.3	6.577e-10	657.7	0.430744
							26	1.028e-06	1028	8.07e-10	807	1.27385		23	1.079e-06	1079	7.566e-10	756.6	1.42612
							27	7.071e-07	707.1	1.138e-09	1138	0.621353		25	6.29e-07	629	1.169e-09	1169	0.538067
														27	1.665e-06	1665	3.761e-09	3761	0.442701
INV Tg2							INV							Ctrl
Cell #	Force (N)	Force (nN)	Area (m2)	Area (um2)	kPa		Cell #	Force (N)	Force (nN)	Area (m2)	Area (um2)	kPa		Cell #	Force (N)	Force (nN)	Area (m2)	Area (um2)	kPa
1	1.859e-07	185.9	1.084e-09	1084	0.171494		1	1.289e-06	1289	1.197e-09	1197	1.07686		1	7.972e-06	7972	1.094e-09	1094	7.28702
2	8.758e-07	875.8	1.838e-09	1838	0.476496		2	4.733e-07	473.3	7.413e-10	741.3	0.638473		2	1.308e-06	1308	1.27e-09	1270	1.02992
3	1.796e-06	1796	1.587e-09	1587	1.1317		3	6.93e-07	693	2.152e-09	2152	0.322026		3	4.615e-07	461.5	1.819e-09	1819	0.253711
5	3.597e-08	35.97	8.208e-10	820.8	0.0438231		5	4.699e-07	469.9	8.381e-10	838.1	0.560673		4	1.335e-06	1335	2.38e-09	2380	0.560924
6	5.288e-07	528.8	2.37e-09	2370	0.223122		7	4.327e-07	432.7	1.691e-09	1691	0.255884		5	6.397e-07	639.7	1.525e-09	1525	0.419475
7	1.161e-07	116.1	1.074e-09	1074	0.108101		8	7.099e-07	709.9	9.342e-10	934.2	0.759902		6	2.424e-07	242.4	9.597e-10	959.7	0.252579
8	6.613e-07	661.3	5.3e-09	5300	0.124774		10	5.098e-07	509.8	2.019e-09	2019	0.252501		7	1.471e-08	14.71	6.504e-10	650.4	0.0226169
9	9.636e-07	963.6	3.513e-09	3513	0.274295		11	2.291e-07	229.1	8.778e-10	877.8	0.260993		8	2.123e-07	212.3	1.228e-09	1228	0.172883
11	6.974e-08	69.74	1.407e-09	1407	0.0495665		12	7.13e-07	713	2.22e-09	2220	0.321171		9	1.118e-07	111.8	6.694e-10	669.4	0.167015
12	4.209e-07	420.9	1.767e-09	1767	0.2382		13	6.376e-07	637.6	1.018e-09	1018	0.626326		10	2.311e-07	231.1	1.393e-09	1393	0.165901
13	2.701e-06	2701	2.534e-09	2534	1.0659		14	4.73e-07	473	1.827e-09	1827	0.258894		11	2.171e-07	217.1	9.723e-10	972.3	0.223285
14	1.372e-07	137.2	1.096e-09	1096	0.125182		15	1.242e-07	124.2	8.029e-10	802.9	0.154689		12	7.001e-07	700.1	1.569e-09	1569	0.446208
15	2.918e-08	29.18	9.627e-10	962.7	0.0303106		16	1.188e-06	1188	1.255e-09	1255	0.946614		13	1.581e-07	158.1	8.639e-10	863.9	0.183007
16	3.683e-07	368.3	1.262e-09	1262	0.291838		17	2.274e-08	22.74	1.392e-09	1392	0.0163362		14	1.028e-06	1028	2.716e-09	2716	0.378498
17	1.319e-06	1319	1.81e-09	1810	0.728729		18	1.791e-06	1791	1.514e-09	1514	1.18296		15	8.855e-08	88.55	1.389e-09	1389	0.0637509
18	2.116e-06	2116	1.201e-09	1201	1.76187		20	4.908e-07	490.8	1.347e-09	1347	0.364365		16	3.508e-07	350.8	7.966e-10	796.6	0.440372
19	2.888e-07	288.8	1.412e-09	1412	0.204533		21	3.74e-07	374	1.166e-09	1166	0.320755		18	1.394e-06	1394	5.454e-09	5454	0.255592
20	1.121e-07	112.1	1.383e-09	1383	0.0810557		23	1.689e-06	1689	4.455e-10	445.5	3.79125		19	2.775e-07	277.5	1.103e-09	1103	0.251587
21	9.494e-08	94.94	1.688e-09	1688	0.0562441		24	1.173e-06	1173	9.573e-10	957.3	1.22532		21	3.566e-07	356.6	1.792e-09	1792	0.198996
22	3.755e-07	375.5	1.281e-09	1281	0.29313		26	7.907e-07	790.7	1.031e-09	1031	0.766925		23	3.658e-07	365.8	8.228e-10	822.8	0.444579
23	9.363e-07	936.3	1.692e-09	1692	0.553369		27	7.989e-07	798.9	1.733e-09	1733	0.460992		24	3.102e-09	3.102	1.068e-09	1068	0.00290449
24	1.773e-06	1773	2.598e-09	2598	0.682448									25	4.753e-07	475.3	1.693e-09	1693	0.280744
25	7.873e-06	7873	1.71e-09	1710	4.60409									26	6.362e-07	636.2	6.799e-10	679.9	0.935726
26	9.131e-07	913.1	2.509e-09	2509	0.36393									27	9.725e-07	972.5	8.115e-10	811.5	1.1984
27	9.682e-06	9682	3.377e-09	3377	2.86704
INV Tg2							INV							Ctrl
Cell #	Force (N)	Force (nN)	Area (m2)	Area (um2)	kPa		Cell #	Force (N)	Force (nN)	Area (m2)	Area (um2)	kPa		Cell #	Force (N)	Force (nN)	Area (m2)	Area (um2)	kPa
2	1.512e-06	1512	8.597e-10	859.7	1.75875		1	1.182e-07	118.2	1.107e-09	1107	0.106775		1	6.22e-08	62.2	7.25e-10	725	0.0857931
3	2.299e-06	2299	2.008e-09	2008	1.14492		2	3.68e-07	368	1.108e-09	1108	0.33213		2	2.587e-07	258.7	1.143e-09	1143	0.226334
4	9.45e-08	94.5	6.817e-10	681.7	0.138624		4	4.378e-07	437.8	1.566e-09	1566	0.279566		6	5.108e-07	510.8	1.85e-09	1850	0.276108
5	9.269e-08	92.69	1.228e-09	1228	0.0754805		5	3.739e-08	37.39	5.397e-10	539.7	0.0692792		7	2.511e-07	251.1	1.052e-09	1052	0.238688
6	1.191e-06	1191	8.43e-10	843	1.41281		6	2.032e-07	203.2	1.192e-09	1192	0.17047		8	5.993e-07	599.3	1.779e-09	1779	0.336875
8	1.09e-07	109	7.442e-10	744.2	0.146466		7	8.018e-08	80.18	8.985e-10	898.5	0.0892376		9	3.93e-07	393	1.529e-09	1529	0.257031
9	1.955e-06	1955	1.992e-09	1992	0.981426		8	1.18e-07	118	1.285e-09	1285	0.0918288		10	1.699e-07	169.9	9.684e-10	968.4	0.175444
12	2.852e-07	285.2	1.09e-09	1090	0.261651		9	1.91e-07	191	1.076e-09	1076	0.177509		11	6.268e-07	626.8	1.499e-09	1499	0.418145
13	7.605e-07	760.5	1.716e-09	1716	0.443182		10	2.116e-07	211.6	1.031e-09	1031	0.205238		12	8.035e-07	803.5	9.905e-10	990.5	0.811206
14	9.229e-07	922.9	1.917e-09	1917	0.481429		12	2.215e-07	221.5	1.359e-09	1359	0.162987		13	1.859e-07	185.9	9.715e-10	971.5	0.191354
15	1.367e-07	136.7	1.958e-09	1958	0.0698161		13	7.689e-08	76.89	1.306e-09	1306	0.0588744		14	4.734e-07	473.4	1.722e-09	1722	0.274913
16	4.396e-07	439.6	1.818e-09	1818	0.241804		14	2.601e-07	260.1	9.419e-10	941.9	0.276144		15	5.302e-07	530.2	1.067e-09	1067	0.496907
17	1.808e-06	1808	9.772e-10	977.2	1.85018		17	2.484e-07	248.4	1.244e-09	1244	0.199678		16	4.793e-07	479.3	2.032e-09	2032	0.235876
18	2.704e-07	270.4	2.241e-09	2241	0.12066		18	3.366e-06	3366	9.317e-10	931.7	3.61275		17	4.54e-07	454	1.279e-09	1279	0.354965
19	1.883e-06	1883	2.195e-09	2195	0.857859		19	5.196e-08	51.96	1.341e-09	1341	0.0387472		18	7.885e-07	788.5	1.352e-09	1352	0.58321
20	1.39e-06	1390	3.354e-09	3354	0.414431		20	8.862e-06	8862	1.016e-09	1016	8.72244		19	2.792e-07	279.2	8.198e-10	819.8	0.340571
21	2.386e-07	238.6	8.177e-10	817.7	0.291794		21	1.333e-08	13.33	6.304e-10	630.4	0.0211453		21	1.925e-07	192.5	1.015e-09	1015	0.189655
22	1.713e-07	171.3	8.46e-10	846	0.202482		22	9.067e-08	90.67	4.767e-10	476.7	0.190203		22	1.352e-07	135.2	5.318e-10	531.8	0.254231
23	1.512e-06	1512	1.703e-09	1703	0.887845		23	7.834e-08	78.34	1.152e-09	1152	0.0680035		24	1.141e-07	114.1	1.757e-09	1757	0.0649402
24	4.122e-06	4122	2.27e-09	2270	1.81586		24	5.735e-08	57.35	4.379e-10	437.9	0.130966		25	5.554e-08	55.54	6.773e-10	677.3	0.0820021
25	4.162e-07	416.2	8.278e-10	827.8	0.502778		25	5.273e-08	52.73	4.756e-10	475.6	0.11087		26	1.6e-07	160	6.522e-10	652.2	0.245324
27	2.822e-07	282.2	9.098e-10	909.8	0.310178		27	2.686e-07	268.6	5.759e-10	575.9	0.4664
29	2.174e-06	2174	2.075e-09	2075	1.04771		25-2	5.729e-08	57.29	3.242e-10	324.2	0.176712
30	9.437e-07	943.7	1.327e-09	1327	0.711153		26-2	1.772e-07	177.2	8.511e-10	851.1	0.208201
31	1.55e-06	1550	1.696e-09	1696	0.913915
33	2.007e-07	200.7	1.317e-09	1317	0.152392
34	6.792e-07	679.2	1.863e-09	1863	0.364573
35	2.748e-07	274.8	8.58e-10	858	0.32028
36	5.38e-07	538	1.447e-09	1447	0.371804
37	1.977e-06	1977	2.34e-09	2340	0.844872

## Sheet: E
MCF7 Motile Fraction
MOTILE FRACTION					File:	1	Motile Frac				File:	2	Motile Frac				File:	3	Motile Frac				File:	4	Motile Frac				File:	5	Motile Frac
Ctrl_1	SUM Y	SUM N	FRAC		Bin	Cell #	Y	N	Frac		Bin	Cell #	Y	N	Frac		Bin	Cell #	Y	N	Frac		Bin	Cell #	Y	N	Frac		Bin	Cell #	Y	N	Frac
1--7	0	23	0		1--7		0	5	0		1--7		0	4	0		1--7		0	3	0		1--7		0	8	0		1--7		0	3	0
7--13	0	25	0		7--13		0	7	0		7--13		0	4	0		7--13		0	3	0		7--13		0	8	0		7--13		0	3	0
13--19	0	25	0		13--19		0	7	0		13--19		0	4	0		13--19		0	3	0		13--19		0	8	0		13--19		0	3	0
19--25	0	24	0		19--25		0	6	0		19--25		0	4	0		19--25		0	3	0		19--25		0	8	0		19--25		0	3	0
25--31	0	25	0		25--31		0	7	0		25--31		0	4	0		25--31		0	3	0		25--31		0	8	0		25--31		0	3	0
31--37	0	23	0		31--37		0	5	0		31--37		0	4	0		31--37		0	3	0		31--37		0	8	0		31--37		0	3	0
	0	145	0
MOTILE FRACTION					File:	1	Motile Frac				File:	2	Motile Frac				File:	3	Motile Frac				File:	4	Motile Frac				File:	5	Motile Frac
Ctrl_2	SUM Y	SUM N	FRAC		Bin	Cell #	Y	N	Frac		Bin	Cell #	Y	N	Frac		Bin	Cell #	0	N	Frac		Bin	Cell #	Y	N	Frac		Bin	Cell #	Y	N	Frac
1--7	0	12	0		1--7		0	1	0		1--7		0	1	0		1--7		0	3	0		1--7		0	4	0		1--7		0	3	0
7--13	0	12	0		7--13		0	1	0		7--13		0	1	0		7--13		0	3	0		7--13		0	4	0		7--13		0	3	0
13--19	1	10	0.0909091		13--19		0	0	#DIV/0!		13--19		0	1	0		13--19		0	3	0		13--19		1	3	0.25		13--19		0	3	0
19--25	0	11	0		19--25		0	0	#DIV/0!		19--25		0	1	0		19--25		0	3	0		19--25		0	4	0		19--25		0	3	0
25--31	0	11	0		25--31		0	0	#DIV/0!		25--31		0	1	0		25--31		0	3	0		25--31		0	4	0		25--31		0	3	0
31--37	1	10	0.0909091		31--37		0	0	#DIV/0!		31--37		0	1	0		31--37		0	3	0		31--37		0	4	0		31--37		1	2	0.333333
	2	66	0.0294118
MOTILE FRACTION					File:	1	Motile Frac				File:	2	Motile Frac				File:	3	Motile Frac				File:	4	Motile Frac				File:	5	Motile Frac
Tg2_1	SUM Y	SUM N	FRAC		Bin	Cell #	Y	N	Frac		Bin	Cell #	Y	N	Frac		Bin	Cell #	Y	N	Frac		Bin	Cell #	Y	N	Frac		Bin	Cell #	Y	N	Frac
1--7	2	20	0.0909091		1--7		0	5	0		1--7		0	4	0		1--7		0	2	0		1--7		1	3	0.25		1--7		1	6	0.142857
7--13	2	20	0.0909091		7--13		1	4	0.2		7--13		0	4	0		7--13		0	2	0		7--13		0	4	0		7--13		1	6	0.142857
13--19	0	22	0		13--19		0	5	0		13--19		0	4	0		13--19		0	2	0		13--19		0	4	0		13--19		0	7	0
19--25	0	22	0		19--25		0	5	0		19--25		0	4	0		19--25		0	2	0		19--25		0	4	0		19--25		0	7	0
25--31	0	22	0		25--31		0	5	0		25--31		0	4	0		25--31		0	2	0		25--31		0	4	0		25--31		0	7	0
31--37	0	22	0		31--37		0	5	0		31--37		0	4	0		31--37		0	2	0		31--37		0	4	0		31--37		0	7	0
	4	128	0.030303
MOTILE FRACTION					File:	1	Motile Frac				File:	2	Motile Frac				File:	3	Motile Frac				File:	4	Motile Frac				File:	5	Motile Frac
Tg2_2	SUM Y	SUM N	FRAC		Bin	Cell #	Y	N	Frac		Bin	Cell #	Y	N	Frac		Bin	Cell #	Y	N	Frac		Bin	Cell #	Y	N	Frac		Bin	Cell #	Y	N	Frac
1--7	1	13	0.0714286		1--7		0	4	0		1--7		0	3	0		1--7		0	2	0		1--7		1	2	0.333333		1--7		0	2	0
7--13	0	14	0		7--13		0	4	0		7--13		0	3	0		7--13		0	2	0		7--13		0	3	0		7--13		0	2	0
13--19	0	14	0		13--19		0	4	0		13--19		0	3	0		13--19		0	2	0		13--19		0	3	0		13--19		0	2	0
19--25	0	14	0		19--25		0	4	0		19--25		0	3	0		19--25		0	2	0		19--25		0	3	0		19--25		0	2	0
25--31	0	14	0		25--31		0	4	0		25--31		0	3	0		25--31		0	2	0		25--31		0	3	0		25--31		0	2	0
31--37	0	14	0		31--37		0	4	0		31--37		0	3	0		31--37		0	2	0		31--37		0	3	0		31--37		0	2	0
	1	83	0.0119048
MOTILE FRACTION					File:	1	Motile Frac				File:	2	Motile Frac				File:	3	Motile Frac				File:	4	Motile Frac				File:	5	Motile Frac
Ctrl_1	SUM Y	SUM N	FRAC		Bin	Cell #	Y	N	Frac		Bin	Cell #	Y	N	Frac		Bin	Cell #	Y	N	Frac		Bin	Cell #	Y	N	Frac		Bin	Cell #	Y	N	Frac
1--7	0	29	0		1--7		0	6	0		1--7		0	7	0		1--7		0	7	0		1--7		0	5	0		1--7		0	4	0
7--13	0	29	0		7--13		0	6	0		7--13		0	7	0		7--13		0	7	0		7--13		0	5	0		7--13		0	4	0
13--19	0	29	0		13--19		0	6	0		13--19		0	7	0		13--19		0	7	0		13--19		0	5	0		13--19		0	4	0
19--25	0	29	0		19--25		0	6	0		19--25		0	7	0		19--25		0	7	0		19--25		0	5	0		19--25		0	4	0
25--31	0	29	0		25--31		0	6	0		25--31		0	7	0		25--31		0	7	0		25--31		0	5	0		25--31		0	4	0
31--37	0	29	0		31--37		0	6	0		31--37		0	7	0		31--37		0	7	0		31--37		0	5	0		31--37		0	4	0
	0	174	0
MOTILE FRACTION					File:	1	Motile Frac				File:	2	Motile Frac				File:	3	Motile Frac				File:	4	Motile Frac				File:	5	Motile Frac
Ctrl_2	SUM Y	SUM N	FRAC		Bin	Cell #	Y	N	Frac		Bin	Cell #	Y	N	Frac		Bin	Cell #	Y	N	Frac		Bin	Cell #	Y	N	Frac		Bin	Cell #	Y	N	Frac
1--7	2	11	0.153846		1--7		0	1	0		1--7		0	1	0		1--7		1	3	0.25		1--7		1	2	0.333333		1--7		0	4	0
7--13	0	13	0		7--13		0	1	0		7--13		0	1	0		7--13		0	4	0		7--13		0	3	0		7--13		0	4	0
13--19	0	13	0		13--19		0	1	0		13--19		0	1	0		13--19		0	4	0		13--19		0	3	0		13--19		0	4	0
19--25	0	13	0		19--25		0	1	0		19--25		0	1	0		19--25		0	4	0		19--25		0	3	0		19--25		0	4	0
25--31	0	13	0		25--31		0	1	0		25--31		0	1	0		25--31		0	4	0		25--31		0	3	0		25--31		0	4	0
31--37	0	13	0		31--37		0	1	0		31--37		0	1	0		31--37		0	4	0		31--37		0	3	0		31--37		0	4	0
	2	76	0.025641
MOTILE FRACTION					File:	1	Motile Frac				File:	2	Motile Frac				File:	3	Motile Frac				File:	4	Motile Frac				File:	5	Motile Frac
Tg2_1	SUM Y	SUM N	FRAC		Bin	Cell #	Y	N	Frac		Bin	Cell #	Y	N	Frac		Bin	Cell #	Y	N	Frac		Bin	Cell #	Y	N	Frac		Bin	Cell #	Y	N	Frac
1--7	0	14	0		1--7		0	4	0		1--7		0	2	0		1--7		0	2	0		1--7		0	2	0		1--7		0	4	0
7--13	0	14	0		7--13		0	4	0		7--13		0	2	0		7--13		0	2	0		7--13		0	2	0		7--13		0	4	0
13--19	1	13	0.0714286		13--19		0	4	0		13--19		0	2	0		13--19		0	2	0		13--19		0	2	0		13--19		1	3	0.25
19--25	0	14	0		19--25		0	4	0		19--25		0	2	0		19--25		0	2	0		19--25		0	2	0		19--25		0	4	0
25--31	0	14	0		25--31		0	4	0		25--31		0	2	0		25--31		0	2	0		25--31		0	2	0		25--31		0	4	0
31--37	1	13	0.0714286		31--37		0	4	0		31--37		0	2	0		31--37		0	2	0		31--37		0	2	0		31--37		1	3	0.25
	2	82	0.0238095
MOTILE FRACTION					File:	1	Motile Frac				File:	2	Motile Frac				File:	3	Motile Frac				File:	4	Motile Frac				File:	5	Motile Frac
Tg2_2	SUM Y	SUM N	FRAC		Bin	Cell #	Y	N	Frac		Bin	Cell #	Y	N	Frac		Bin	Cell #	Y	N	Frac		Bin	Cell #	Y	N	Frac		Bin	Cell #	Y	N	Frac
1--7	0	10	0		1--7		0	1	0		1--7		0	2	0		1--7		0	2	0		1--7		0	2	0		1--7		0	3	0
7--13	1	9	0.1		7--13		0	1	0		7--13		0	2	0		7--13		0	2	0		7--13		0	2	0		7--13		1	2	0.333333
13--19	1	9	0.1		13--19		0	1	0		13--19		0	2	0		13--19		1	1	0.5		13--19		0	2	0		13--19		0	3	0
19--25	0	10	0		19--25		0	1	0		19--25		0	2	0		19--25		0	2	0		19--25		0	2	0		19--25		0	3	0
25--31	0	10	0		25--31		0	1	0		25--31		0	2	0		25--31		0	2	0		25--31		0	2	0		25--31		0	3	0
31--37	0	10	0		31--37		0	1	0		31--37		0	2	0		31--37		0	2	0		31--37		0	2	0		31--37		0	3	0
	2	58	0.0333333
MOTILE FRACTION					File:	1	Motile Frac				File:	2	Motile Frac				File:	3	Motile Frac				File:	4	Motile Frac				File:	5	Motile Frac
Ctrl_1	SUM Y	SUM N	FRAC		Bin	Cell #	Y	N	Frac		Bin	Cell #	Y	N	Frac		Bin	Cell #	Y	N	Frac		Bin	Cell #	Y	N	Frac		Bin	Cell #	Y	N	Frac
1--7	0	18	0		1--7		0	2	0		1--7		0	4	0		1--7		0	1	0		1--7		0	6	0		1--7		0	5	0
7--13	1	17	0.0555556		7--13		1	1	0.5		7--13		0	4	0		7--13		0	1	0		7--13		0	6	0		7--13		0	5	0
13--19	1	17	0.0555556		13--19		1	1	0.5		13--19		0	4	0		13--19		0	1	0		13--19		0	6	0		13--19		0	5	0
19--25	1	17	0.0555556		19--25		1	1	0.5		19--25		0	4	0		19--25		0	1	0		19--25		0	6	0		19--25		0	5	0
25--31	1	17	0.0555556		25--31		1	1	0.5		25--31		0	4	0		25--31		0	1	0		25--31		0	6	0		25--31		0	5	0
31--37	1	17	0.0555556		31--37		1	1	0.5		31--37		0	4	0		31--37		0	1	0		31--37		0	6	0		31--37		0	5	0
	5	103	0.0462963
MOTILE FRACTION					File:	1	Motile Frac				File:	2	Motile Frac				File:	3	Motile Frac				File:	4	Motile Frac				File:	5	Motile Frac
Ctrl_2	SUM Y	SUM N	FRAC		Bin	Cell #	Y	N	Frac		Bin	Cell #	Y	N	Frac		Bin	Cell #	Y	N	Frac		Bin	Cell #	Y	N	Frac		Bin	Cell #	Y	N	Frac
1--7	0	16	0		1--7		0	4	0		1--7		0	1	0		1--7		0	3	0		1--7		0	4	0		1--7		0	4	0
7--13	0	16	0		7--13		0	4	0		7--13		0	1	0		7--13		0	3	0		7--13		0	4	0		7--13		0	4	0
13--19	0	16	0		13--19		0	4	0		13--19		0	1	0		13--19		0	3	0		13--19		0	4	0		13--19		0	4	0
19--25	0	16	0		19--25		0	4	0		19--25		0	1	0		19--25		0	3	0		19--25		0	4	0		19--25		0	4	0
25--31	0	16	0		25--31		0	4	0		25--31		0	1	0		25--31		0	3	0		25--31		0	4	0		25--31		0	4	0
31--37	1	15	0.0625		31--37		0	4	0		31--37		0	1	0		31--37		0	3	0		31--37		1	3	0.25		31--37		0	4	0
	1	95	0.0104167
MOTILE FRACTION					File:	1	Motile Frac				File:	2	Motile Frac				File:	3	Motile Frac				File:	4	Motile Frac				File:	5	Motile Frac
Tg2_1	SUM Y	SUM N	FRAC		Bin	Cell #	Y	N	Frac		Bin	Cell #	Y	N	Frac		Bin	Cell #	Y	N	Frac		Bin	Cell #	Y	N	Frac		Bin	Cell #	Y	N	Frac
1--7	1	11	0.0833333		1--7			1	0		1--7		0	2	0		1--7		1	1	0.5		1--7		0	4	0		1--7		0	3	0
7--13	1	11	0.0833333		7--13			1	0		7--13		0	2	0		7--13		1	1	0.5		7--13		0	4	0		7--13		0	3	0
13--19	1	11	0.0833333		13--19			1	0		13--19		0	2	0		13--19		1	1	0.5		13--19		0	4	0		13--19		0	3	0
19--25	1	11	0.0833333		19--25			1	0		19--25		0	2	0		19--25		1	1	0.5		19--25		0	4	0		19--25		0	3	0
25--31	1	11	0.0833333		25--31			1	0		25--31		0	2	0		25--31		1	1	0.5		25--31		0	4	0		25--31		0	3	0
31--37	1	11	0.0833333		31--37			1	0		31--37		0	2	0		31--37		1	1	0.5		31--37		0	4	0		31--37		0	3	0
	6	66	0.0833333
MOTILE FRACTION					File:	1	Motile Frac				File:	2	Motile Frac				File:	3	Motile Frac				File:	4	Motile Frac				File:	5	Motile Frac
Tg2_2	SUM Y	SUM N	FRAC		Bin	Cell #	Y	N	Frac		Bin	Cell #	Y	N	Frac		Bin	Cell #	Y	N	Frac		Bin	Cell #	Y	N	Frac		Bin	Cell #	Y	N	Frac
1--7	0	13	0		1--7		0	3	0		1--7		0	2	0		1--7		0	2	0		1--7		0	4	0		1--7		0	2	0
7--13	0	13	0		7--13		0	3	0		7--13		0	2	0		7--13		0	2	0		7--13		0	4	0		7--13		0	2	0
13--19	0	13	0		13--19		0	3	0		13--19		0	2	0		13--19		0	2	0		13--19		0	4	0		13--19		0	2	0
19--25	0	13	0		19--25		0	3	0		19--25		0	2	0		19--25		0	2	0		19--25		0	4	0		19--25		0	2	0
25--31	0	13	0		25--31		0	3	0		25--31		0	2	0		25--31		0	2	0		25--31		0	4	0		25--31		0	2	0
31--37	0	13	0		31--37		0	3	0		31--37		0	2	0		31--37		0	2	0		31--37		0	4	0		31--37		0	2	0
	0	78	0

## Sheet: FG
MCF7 MV Traction Force
Ctrl							MCF7 Tg2							MCF7
Cell #	Force (N)	Force (nN)	Area (m2)	Area (um2)	kPa		Cell #	Force (N)	Force (nN)	Area (m2)	Area (um2)	kPa		Cell #	Force (N)	Force (nN)	Area (m2)	Area (um2)	kPa
1	3.771e-08	37.71	5.672e-10	567.2	0.0664845		1	6.877e-08	68.77	1.425e-09	1425	0.0482596		1	2.029e-07	202.9	9.922e-10	992.2	0.204495
2	1.474e-06	1474	1.063e-09	1063	1.38664		2	1.325e-06	1325	9.349e-10	934.9	1.41726		2	1.111e-06	1111	1.101e-09	1101	1.00908
3	7.756e-08	77.56	8.616e-10	861.6	0.0900186		5	1.926e-07	192.6	7.738e-10	773.8	0.248902		4	2.16e-07	216	1.529e-09	1529	0.141269
4	3.223e-07	322.3	1.254e-09	1254	0.257018		6	2.682e-07	268.2	6.939e-10	693.9	0.386511		5	1.557e-06	1557	1.131e-09	1131	1.37666
5	2.078e-07	207.8	5.136e-10	513.6	0.404595		7	6.583e-08	65.83	1.022e-09	1022	0.0644129		6	1.658e-08	16.58	7.943e-10	794.3	0.0208737
6	8.374e-08	83.74	7.398e-10	739.8	0.113193		8	1.358e-06	1358	2.909e-09	2909	0.466827		7	4.204e-06	4204	2.067e-09	2067	2.03387
7	1.362e-07	136.2	1.04e-09	1040	0.130962		10	9.926e-07	992.6	4.013e-09	4013	0.247346		8	7.208e-07	720.8	8.301e-10	830.1	0.868329
9	1.288e-06	1288	1.379e-09	1379	0.93401		13	2.105e-07	210.5	1.547e-09	1547	0.13607		10	2.125e-06	2125	4.964e-09	4964	0.428082
10	7.718e-08	77.18	7.695e-10	769.5	0.100299		15	1.168e-06	1168	2.989e-09	2989	0.390766		11	9.854e-07	985.4	2.498e-09	2498	0.394476
11	7.696e-06	7696	3.27e-09	3270	2.35352		17	2.141e-06	2141	2.864e-09	2864	0.747556		12	4.094e-07	409.4	1.832e-09	1832	0.223472
12	4.919e-08	49.19	2.276e-09	2276	0.0216125		18	3.066e-07	306.6	2.966e-09	2966	0.103372		13	4.731e-07	473.1	2.103e-09	2103	0.224964
14	2.392e-07	239.2	1.093e-09	1093	0.218847		19	1.016e-07	101.6	1.393e-09	1393	0.0729361		14	2.774e-07	277.4	2.334e-09	2334	0.118852
15	1.707e-06	1707	2.778e-09	2778	0.614471		20	5.654e-06	5654	1.828e-09	1828	3.093		15	9.418e-07	941.8	9.142e-10	914.2	1.03019
16	1.196e-06	1196	1.354e-09	1354	0.883309		22	4.334e-07	433.4	2.346e-09	2346	0.18474		16	7.17e-07	717	1.103e-09	1103	0.650045
18	2.616e-06	2616	1.294e-09	1294	2.02164		23	3.923e-07	392.3	1.66e-09	1660	0.236325		17	4.413e-07	441.3	1.96e-09	1960	0.225153
20	3.537e-08	35.37	9.409e-10	940.9	0.0375917		24	5.704e-07	570.4	1.117e-09	1117	0.510654		18	4.557e-07	455.7	1.381e-09	1381	0.329978
21	3.455e-07	345.5	1.262e-09	1262	0.273772		26	9.76e-07	976	2.214e-09	2214	0.440831		19	5.477e-07	547.7	9.292e-10	929.2	0.589432
23	4.583e-07	458.3	2.688e-09	2688	0.170499		27	2.227e-06	2227	4.008e-09	4008	0.555639		20	8.292e-07	829.2	3.518e-09	3518	0.235702
24	6.471e-07	647.1	2.524e-09	2524	0.256379									21	2.773e-07	277.3	1.462e-09	1462	0.189672
25	3.294e-07	329.4	1.152e-09	1152	0.285938									22	2.693e-07	269.3	1.68e-09	1680	0.160298
26	1.127e-07	112.7	1.386e-09	1386	0.0813131									25	8.986e-07	898.6	1.2e-09	1200	0.748833
27	4.825e-07	482.5	8.453e-10	845.3	0.570803									27	1.177e-06	1177	2.363e-09	2363	0.498096
MCF7tg2
Cell #	Force (N)	Force (nN)	Area (m2)	Area (um2)	kPa		mcf7							ctrl
1	1.036e-06	1036	1.915e-09	1915	0.540992		Cell #	Force (N)	Force (nN)	Area (m2)	Area (um2)	kPa		Cell #	Force (N)	Force (nN)	Area (m2)	Area (um2)	kPa
2	1.503e-06	1503	1.296e-09	1296	1.15972		1	4.752e-07	475.2	1.488e-09	1488	0.319355		5	8.4e-07	840	7.049e-10	704.9	1.19166
4	1.375e-06	1375	3.279e-09	3279	0.419335		2	1.757e-06	1757	1.569e-09	1569	1.11982		8	1.551e-07	155.1	7.047e-10	704.7	0.220094
5	1.832e-07	183.2	1.14e-09	1140	0.160702		3	1.121e-06	1121	1.075e-09	1075	1.04279		10	1.114e-07	111.4	6.417e-10	641.7	0.173601
9	1.043e-06	1043	1.125e-09	1125	0.927111		4	5.604e-08	56.04	9.4e-10	940	0.059617		12	2.41e-06	2410	3.218e-09	3218	0.748912
12	3.098e-07	309.8	1.604e-09	1604	0.193142		5	2.92e-07	292	1.357e-09	1357	0.215181		13	6.612e-07	661.2	1.049e-09	1049	0.630315
13	1.072e-07	107.2	1.464e-09	1464	0.073224		6	6.195e-07	619.5	2.574e-09	2574	0.240676		14	2.94e-06	2940	2.053e-09	2053	1.43205
17	3.315e-07	331.5	2.505e-09	2505	0.132335		7	2.172e-08	21.72	4.406e-10	440.6	0.0492964		15	6.456e-07	645.6	1.687e-09	1687	0.382691
22	2.419e-06	2419	2.185e-09	2185	1.10709		10	7.821e-08	78.21	1.205e-09	1205	0.0649046		16	1.838e-07	183.8	1.353e-09	1353	0.135846
23	1.111e-08	11.11	2.092e-09	2092	0.00531071		12	5.169e-07	516.9	1.855e-09	1855	0.278652		18	7.965e-07	796.5	3.032e-09	3032	0.262698
24	7.422e-07	742.2	1.641e-09	1641	0.452285		13	7.575e-07	757.5	9.563e-10	956.3	0.792115		20	2.156e-07	215.6	8.136e-10	813.6	0.264995
							14	5.935e-08	59.35	5.867e-10	586.7	0.101159		21	4.091e-07	409.1	1.009e-09	1009	0.405451
							15	1.731e-06	1731	1.395e-09	1395	1.24086		22	4.913e-07	491.3	1.472e-09	1472	0.333764
							16	2.798e-07	279.8	1.004e-09	1004	0.278685		23	6.341e-07	634.1	9.137e-10	913.7	0.693991
							17	6.617e-07	661.7	2.175e-09	2175	0.30423
							19	1.508e-06	1508	1.584e-09	1584	0.95202
							20	4.547e-08	45.47	5.359e-10	535.9	0.0848479
mcf7tg2							mcf7							ctrl
Cell #	Force (N)	Force (nN)	Area (m2)	Area (um2)	kPa		Cell #	Force (N)	Force (nN)	Area (m2)	Area (um2)	kPa		Cell #	Force (N)	Force (nN)	Area (m2)	Area (um2)	kPa
2	2.395e-06	2395	1.176e-09	1176	2.03656		2	2.444e-06	2444	7.527e-10	752.7	3.24698		4	1.879e-06	1879	1.518e-09	1518	1.23781
3	6.469e-07	646.9	2.807e-09	2807	0.23046		6	1.622e-07	162.2	4.961e-10	496.1	0.32695		5	3.416e-07	341.6	1.435e-09	1435	0.238049
5	4.307e-07	430.7	6.888e-10	688.8	0.62529		12	1.161e-06	1161	2.12e-09	2120	0.547642		13	6.542e-06	6542	9.076e-10	907.6	7.20802
6	4.56e-07	456	2.383e-09	2383	0.191355		16	1.406e-07	140.6	1.399e-09	1399	0.1005		14	7.27e-07	727	1.68e-09	1680	0.432738
7	1.248e-06	1248	1.557e-09	1557	0.801541		17	1.203e-06	1203	7.644e-10	764.4	1.57378		15	1.393e-06	1393	8.555e-10	855.5	1.62829
8	4.328e-07	432.8	1.555e-09	1555	0.278328		18	2.32e-07	232	8.724e-10	872.4	0.265933		16	8.086e-07	808.6	7.331e-10	733.1	1.10299
9	4.441e-08	44.41	1.183e-09	1183	0.0375402		19	4.619e-08	46.19	4.778e-10	477.8	0.0966722		20	5.14e-07	514	1.092e-09	1092	0.470696
10	1.701e-06	1701	1.813e-09	1813	0.938224		20	6.506e-07	650.6	5.633e-10	563.3	1.15498		24	2.948e-08	29.48	5.494e-10	549.4	0.0536585
11	9.268e-07	926.8	2.897e-09	2897	0.319917		21	9.271e-07	927.1	1.937e-09	1937	0.478627
12	5.072e-06	5072	2.925e-09	2925	1.73402		23	1.109e-07	110.9	9.202e-10	920.2	0.120517
14	1.187e-06	1187	1.524e-09	1524	0.778871
15	1.54e-06	1540	2.63e-09	2630	0.585551
16	6.501e-07	650.1	1.545e-09	1545	0.420777
17	3.332e-06	3332	1.694e-09	1694	1.96694
18	1.094e-06	1094	2.411e-09	2411	0.453754
19	1.872e-06	1872	1.81e-09	1810	1.03425
20	4.614e-07	461.4	1.507e-09	1507	0.306171

## Sheet: H
MCF7/3T3 Spheroid
2022-01-09	Spheroid Area
Spheroid	0h	72h	72h
ctrl_bl	65859	286654	3.35255
ctrl_br	65347.8	173384	1.65324
ctrl_c	73499.8	311428	3.23713
ctrl_tl	64846	195548	2.01557
ctrl_tr	67171.2	162795	1.42358
mcf7mv_bl	62033.5	246381	2.97174
mcf7mv_br	56887.5	268423	3.71849
mcf7mv_c	62636.9	280740	3.48203
mcf7mv_tl	80485.1	194315	1.41429
mcf7tg2mv_bl	81234.9	413369	4.08857
mcf7tg2mv_br	68592.1	364578	4.31516
mcf7tg2mv_c	48301.5	428532	7.87203
mcf7tg2mv_tl	66301.2	320864	3.8395
mcf7tg2mv_tr	67467.5	297355	3.40738
2022-01-12	Spheroid Area
Spheroid	0h	72h	72h
ctrl_bl	136080	173072	0.271844
ctrl_c	65480.2	115200	0.759308
ctrl_tl	179720	264893	0.473922
ctrl_tr	121747	232913	0.913092
mcf7mv_bl	167207	330006	0.973636
mcf7mv_br	129609	334085	1.57764
mcf7mv_tl	138206	315243	1.28096
mcf7mv_tr	161872	291709	0.802093
mcf7tg2mv_br	125251	289572	1.31194
mcf7tg2mv_c	135342	278823	1.06014
mcf7tg2mv_tl	124295	260180	1.09325
mcf7tg2mv_tr	150588	341601	1.26845
2022-01-19	Spheroid Area
Spheroid	0h	72h	72h
ctrl_bl	109102	199408	0.827726
ctrl_br	85909.4	252679	1.94123
ctrl_tl	66854	154295	1.30794
ctrl_tr	103762	204948	0.975171
mcf7mv_bl	100214	182755	0.823636
mcf7mv_br	73276.8	197466	1.6948
mcf7mv_tl	73892.2	158516	1.14524
mcf7mv_tr	119495	210377	0.760544
mcf7tg2mv_bl	105390	366141	2.47417
mcf7tg2mv_br	96158.8	298654	2.10584
mcf7tg2mv_tl	91847.5	283517	2.08682
mcf7tg2mv_tr	101411	328021	2.23458

## Sheet: JK
Tg2 Area	Tg2 Traction Force
Ctrl	TF (N)	TF (nN)	Area (m2)	Area (um2)	kpa		1tg2	TF (N)	TF (nN)	Area (m2)	Area (um2)	kpa		nonmv	TF (N)	TF (nN)	Area (m2)	Area (um2)	kpa
2	1.233e-06	1233	7.485e-10	748.5	1.64729		1	6.463e-07	646.3	2.208e-09	2208	0.292708		2	1.004e-06	1004	2.76e-09	2760	0.363768
3	3.388e-07	338.8	7.375e-10	737.5	0.45939		2	7.679e-07	767.9	1.757e-09	1757	0.437052		3	1.423e-06	1423	5.825e-09	5825	0.244292
6	5.704e-07	570.4	1.464e-09	1464	0.389617		3	4.269e-07	426.9	1.127e-09	1127	0.378793		5	5.329e-07	532.9	1.812e-09	1812	0.294095
7	2.904e-07	290.4	1.373e-09	1373	0.211508		4	4.197e-07	419.7	1.329e-09	1329	0.315801		6	8.506e-08	85.06	1.021e-09	1021	0.0833105
8	4.606e-07	460.6	9.506e-10	950.6	0.484536		6	1.515e-06	1515	2.726e-09	2726	0.555759		7	1.331e-06	1331	2.41e-09	2410	0.552282
11	9.188e-07	918.8	1.691e-09	1691	0.543347		7	2.756e-06	2756	6.366e-09	6366	0.432925		8	1.247e-06	1247	2.429e-09	2429	0.51338
12	7.649e-07	764.9	2.046e-09	2046	0.373851		8	1.293e-06	1293	1.956e-09	1956	0.661043		9	6.283e-07	628.3	1.809e-09	1809	0.347319
13	5.456e-07	545.6	1.645e-09	1645	0.331672		9	4.206e-07	420.6	1.59e-09	1590	0.264528		10	1.226e-06	1226	1.771e-09	1771	0.692264
14	1.302e-06	1302	1.526e-09	1526	0.853211		10	5.684e-06	5684	9.075e-09	9075	0.626336		11	5.91e-07	591	3.014e-09	3014	0.196085
15	7.523e-07	752.3	1.881e-09	1881	0.399947		11	1.524e-06	1524	2.328e-09	2328	0.654639		12	9.35e-06	9350	4.645e-09	4645	2.01292
16	1.244e-06	1244	2.402e-09	2402	0.517902		12	9.915e-07	991.5	2.613e-09	2613	0.379449		13	9.96e-07	996	1.815e-09	1815	0.54876
18	1.057e-06	1057	8.385e-10	838.5	1.26058		13	2.484e-06	2484	1.173e-09	1173	2.11765		14	8.583e-07	858.3	2.444e-09	2444	0.351187
19	1.016e-05	10160	3.026e-09	3026	3.35757		15	1.78e-06	1780	3.494e-09	3494	0.509445		15	1.298e-06	1298	3.412e-09	3412	0.380422
20	1.324e-06	1324	2.245e-09	2245	0.589755		16	1.993e-06	1993	3.142e-09	3142	0.634309		16	1.333e-06	1333	3.378e-09	3378	0.394612
22	1.546e-07	154.6	7.154e-10	715.4	0.216103		17	1.635e-06	1635	3.972e-09	3972	0.411631		17	1.03e-06	1030	3.212e-09	3212	0.320672
							18	8.296e-07	829.6	1.873e-09	1873	0.442926		18	9.461e-07	946.1	2.876e-09	2876	0.328964
							19	1.331e-06	1331	1.459e-09	1459	0.912269		20	3.088e-06	3088	2.442e-09	2442	1.26454
							20	6.916e-06	6916	4.44e-09	4440	1.55766		21	1.578e-06	1578	3.272e-09	3272	0.482274
							21	5.128e-06	5128	4.547e-09	4547	1.12778		22	8.935e-06	8935	3.696e-09	3696	2.41748
							23	1.066e-06	1066	1.555e-09	1555	0.685531		23	5.074e-06	5074	3.54e-09	3540	1.43333
							24	9.121e-07	912.1	1.269e-09	1269	0.718755		24	1.282e-06	1282	2.295e-09	2295	0.558606
							25	2.14e-06	2140	2.201e-09	2201	0.972285		26	1.494e-06	1494	3.732e-09	3732	0.400322
							26	1.128e-05	11280	1.909e-09	1909	5.90885		27	1.162e-06	1162	3.173e-09	3173	0.366215
Ctrl	TF (N)	TF (nN)	Area (m2)	Area (um2)	kpa		1tg2	TF (N)	TF (nN)	Area (m2)	Area (um2)	kpa		nonmv	TF (N)	TF (nN)	Area (m2)	Area (um2)	kpa
5	3.012e-07	301.2	9.431e-10	943.1	0.319372		1	8.789e-07	878.9	9.442e-10	944.2	0.930841		1	1.415e-06	1415	3.534e-09	3534	0.400396
13	1.184e-07	118.4	9.269e-10	926.9	0.127738		2	9.737e-06	9737	1.468e-09	1468	6.63283		2	1.73e-06	1730	2.049e-09	2049	0.844314
16	6.547e-07	654.7	9.669e-10	966.9	0.677112		3	8.104e-06	8104	6.59e-09	6590	1.22974		3	5.895e-06	5895	6.311e-09	6311	0.934083
17	5.883e-07	588.3	6.996e-10	699.6	0.840909		5	6.573e-06	6573	4.782e-09	4782	1.37453		5	1.386e-06	1386	1.473e-09	1473	0.940937
18	4.959e-06	4959	4.82e-09	4820	1.02884		6	3.128e-06	3128	3.656e-09	3656	0.85558		6	2.534e-06	2534	2.777e-09	2777	0.912495
20	3.045e-07	304.5	6.23e-10	623	0.488764		7	8.211e-06	8211	1.333e-09	1333	6.15979		7	1.675e-06	1675	2.579e-09	2579	0.649477
21	3.447e-07	344.7	9.079e-10	907.9	0.379667		9	2.702e-06	2702	2.809e-09	2809	0.961908		8	4.775e-06	4775	5.39e-09	5390	0.8859
22	1.483e-06	1483	1.96e-09	1960	0.756633		11	2.434e-05	24340	2.769e-09	2769	8.79018		9	3.709e-06	3709	4.93e-09	4930	0.752333
23	9.236e-07	923.6	9.706e-10	970.6	0.951576		12	7.317e-06	7317	5.062e-09	5062	1.44548		12	1.438e-06	1438	1.638e-09	1638	0.8779
24	1.111e-07	111.1	4.704e-10	470.4	0.236182		13	1.626e-06	1626	3.052e-09	3052	0.532765		13	1.156e-06	1156	1.508e-09	1508	0.766578
27	6.003e-07	600.3	9.908e-10	990.8	0.605874		14	7.884e-06	7884	1.453e-09	1453	5.42602		16	1.096e-06	1096	1.959e-09	1959	0.559469
13-2	2.418e-07	241.8	3.877e-10	387.7	0.623678		16	1.029e-06	1029	1.57e-09	1570	0.655414		17	1.349e-06	1349	2.469e-09	2469	0.546375
24-2	7.935e-08	79.35	3.168e-10	316.8	0.250473		17	2.121e-06	2121	2.735e-09	2735	0.775503		18	1.054e-06	1054	1.748e-09	1748	0.602975
							18	4.852e-07	485.2	1.209e-09	1209	0.401323		20	2.555e-06	2555	2.399e-09	2399	1.06503
							19	5.298e-06	5298	2.816e-09	2816	1.88139		23	3.76e-06	3760	3.712e-09	3712	1.01293
							20	1.83e-06	1830	4.008e-09	4008	0.456587		25	1.893e-06	1893	1.651e-09	1651	1.14658
							21	1.225e-06	1225	2.65e-09	2650	0.462264		26	2.126e-06	2126	2.081e-09	2081	1.02162
							22	1.318e-06	1318	3.519e-09	3519	0.374538		6--2	1.522e-06	1522	1.569e-09	1569	0.970045
							23	7.425e-07	742.5	1.092e-09	1092	0.679945
							25	1.67e-06	1670	2.159e-09	2159	0.773506
							26	5.04e-07	504	8.208e-10	820.8	0.614035
							26-2	8.939e-07	893.9	1.051e-09	1051	0.850523
Ctrl	TF (N)	TF (nN)	Area (m2)	Area (um2)	kpa		1tg2	TF (N)	TF (nN)	Area (m2)	Area (um2)	kpa		nonmv	TF (N)	TF (nN)	Area (m2)	Area (um2)	kpa
5	5.155e-05	51550	8.824e-10	882.4	58.4202		1	2.426e-06	2426	2.263e-09	2263	1.07203		4	1.201e-05	12010	3.365e-09	3365	3.56909
8	1.221e-06	1221	8.577e-10	857.7	1.42357		2	7.795e-07	779.5	1.137e-09	1137	0.685576		5	5.154e-06	5154	1.561e-09	1561	3.30173
11	1.083e-06	1083	5.728e-10	572.8	1.89071		3	1.665e-06	1665	8.343e-10	834.3	1.99569		7	4.817e-06	4817	8.921e-10	892.1	5.39962
12	8.134e-08	81.34	8.662e-10	866.2	0.0939044		4	4.713e-07	471.3	1.163e-09	1163	0.405245		8	4.507e-05	45070	3.589e-09	3589	12.5578
16	1.523e-05	15230	1.911e-09	1911	7.96965		5	3.449e-06	3449	3.335e-09	3335	1.03418		9	2.71e-06	2710	2.156e-09	2156	1.25696
19	9.901e-07	990.1	2.537e-09	2537	0.390264		6	5.846e-07	584.6	1.389e-09	1389	0.420878		10	4.172e-06	4172	1.932e-09	1932	2.15942
20	6.272e-06	6272	9.949e-10	994.9	6.30415		7	9.975e-07	997.5	2.259e-09	2259	0.441567		11	6.169e-06	6169	3.396e-09	3396	1.81655
21	9.296e-06	9296	3.869e-09	3869	2.40269		8	1.925e-06	1925	3.069e-09	3069	0.62724		13	1.119e-05	11190	5.446e-09	5446	2.05472
							9	7.1e-07	710	2.148e-09	2148	0.33054		15	1.406e-06	1406	1.002e-09	1002	1.40319
							10	1.4e-06	1400	9.608e-10	960.8	1.45712		16	2.691e-06	2691	1.079e-09	1079	2.49398
							11	1.875e-06	1875	1.763e-09	1763	1.06353		20	5.953e-06	5953	1.292e-09	1292	4.60759
							12	1.108e-06	1108	2.156e-09	2156	0.513915		18-2	1.535e-06	1535	1.059e-09	1059	1.44948
							13	1.315e-06	1315	9.705e-10	970.5	1.35497
							14	4.142e-07	414.2	1.649e-09	1649	0.251183
							16	4.914e-06	4914	1.73e-09	1730	2.84046
							19	3.021e-06	3021	3.806e-09	3806	0.793747
							20	1.741e-06	1741	2.056e-09	2056	0.84679
							21	5.599e-07	559.9	1.405e-09	1405	0.398505
