# Supplementary material for: Weakly migratory metastatic breast cancer cells activate fibroblasts via microvesicle-Tg2 to facilitate dissemination and metastasis
Source: eLife journal article supplement (doi:10.7554/elife.74433), 2022-12-06
Supplement: supp [file Source Data Figure 4.xlsx]

## Sheet: C
	071719_G_asmagapdh_pico_8sec		022720_pico_5sec		022720_dura_3sec
	pLKO_1	shTg2_1	2/6/20 pLKO A	2/6/20 shtg2 A	2/20/20 plko	2/20/20 shtg2
aSMA	2711.62	1119.18	6430.47	3940.1	1072.48	430.506
GAPDH	8498.76	7103.93	7912.47	7538.54	8956.95	5988.59
aSMA/GAPDH	0.319061	0.157544	0.812701	0.522661	0.119737	0.0718877
	1	0.493776	1	0.643117	1	0.600381

## Sheet: D
	Fibroblast area (um2)
	MV- (scr)	MV- (shtg2)
rep1	1459	723.6
	3795	1025
	1594	1697
	2085	1082
	1506	1401
	1759	1035
	2074	735.7
	2240	658.8
	2234	856.3
	2333	1289
	1193	622.6
	1350	898.9
	1403	2549
	1780	689.7
	1623	861.2
	2550	1320
	2869	638.9
	4332	1236
	2357
	1277
	1524
	2469
	1607
	1364
rep2	3569	1804
	2005	1041
	1504	725
	1560	1641
	2350	2271
	1669	909.7
	1647	1677
	1782	1096
	2392	1121
	1473	1824
	1610	703.3
	4660	641.2
	2246	1066
	1122	2087
	1161	1007
	2518	1684
	1298	2389
	1772	1724
	1863	1054
	1444	904
	1539	800.3
	1265	695.8
	1387	942.7
	1880	670.7
rep3	1247	734.4
	1596	1099
	869.9	1694
	2292	1944
	1095	1549
	1558	660.7
	2377	2549
	3501	936.5
	1502	1970
	1592	929.6
	3443	1099
	1138	2289
	2376	1071
	1244	1591
	854.3	1495
	1578	1658
	2401	1815
	1521	1247
	1275	748.9
	6239	857.1
	1667	910.8
	2226	1090
	1639	982.6
	1662	1759
	3092	707.4
	1302	1167
	1776	941.5

## Sheet: E
	MV- scrambled					MV- shtg2
	Cell Area	Fn Area	Fn frac			Cell Area	Fn Area	Fn frac
rep1	1467.2	903.225	0.61561		rep1	1329.24	130.149	0.0979126
	1649.72	979.438	0.593698			1242.47	500.272	0.402643
	3567.95	1714.6	0.480556			882.901	186.82	0.211598
	1784.56	836.392	0.468682			1177.59	153.99	0.130767
	1251.85	337.683	0.269747			1302.66	136.793	0.105011
	938.4	0.782	0.000833333			910.26	435.393	0.478317
	1670.05	490.892	0.293939			1033.76	104.354	0.100946
	2206.28	654.261	0.296545			1064.64	102.399	0.0961818
	2283.27	17.979	0.00787423			1145.54	85.984	0.0750595
	3485.88	986.473	0.282991			1343.31	137.966	0.102706
	3465.94	1664.58	0.480266			1523.87	73.477	0.0482172
	4547.78	1690.76	0.371777			586.256	15.633	0.0266658
	2574.84	809.424	0.31436			950.907	16.415	0.0172625
	955.988	114.124	0.119378			1215.5	103.572	0.0852091
	2301.25	272.023	0.118207			480.73	125.85	0.261789
	2512.69	1434.76	0.571006			795.745	114.515	0.143909
	2998.11	1625.49	0.542172			1127.17	244.664	0.21706
	1643.86	828.184	0.503804			2182.83	585.083	0.268039
	2108.57	956.769	0.453753			1085.75	69.96	0.064435
	3134.12	1383.95	0.441576			1395.68	143.437	0.102772
	1355.03	534.665	0.394577			1225.66	375.985	0.30676
	1209.64	461.97	0.381907			646.054	231.766	0.358741
	1463.29	1078.32	0.736913			1414.05	180.567	0.127695
	762.914	184.866	0.242316			1007.97	2.345	0.00232646
	1364.41	435.783	0.319392			1537.55	64.097	0.0416877
	1627.06	546	0.335576			1195.18	313.451	0.262263
rep2	1041.97	321.659	0.308702			803.952	48.855	0.0607686
	1230.36	195.028	0.158514			823.885	234.893	0.285104
	307.98	174.704	0.567258			728.521	40.647	0.0557939
	973.966	118.033	0.121188			687.092	177.049	0.257679
	2074.56	997.026	0.480595			1119.75	41.429	0.0369985
	3026.25	319.705	0.105644			1594.62	211.052	0.132353
	2479.47	236.066	0.0952082			1951.06	289.61	0.148437
	2587.73	592.9	0.229119		rep2	2254.35	699.208	0.31016
	3131.78	299.381	0.0955946			334.947	106.699	0.318555
	1490.26	28.531	0.019145			325.177	42.21	0.129806
	531.929	33.221	0.0624538			610.097	23.45	0.0384365
	2201.98	173.141	0.0786298			702.334	25.795	0.0367275
	1688.03	435.002	0.257699			1252.63	175.877	0.140406
	2558.03	383.802	0.150038			398.654	45.728	0.114706
	2323.92	261.079	0.112344			536.619	19.933	0.0371455
	1265.53	201.672	0.159358			2413.42	30.876	0.0127935
	4256.22	528.803	0.124242			1993.27	48.464	0.0243138
	1557.88	55.108	0.0353738			838.737	5.081	0.00605792
	411.942	177.44	0.43074			636.674	53.936	0.0847153
	921.594	89.502	0.0971165			423.668	42.21	0.0996299
rep3	2944.96	427.576	0.145189			2613.14	473.304	0.181125
	1460.17	445.164	0.304872			1383.17	13.288	0.0096069
	1049.01	496.363	0.473174			866.486	84.421	0.0974292
	861.014	74.65	0.0867001			1138.51	25.795	0.0226568
	2607.67	279.449	0.107164			1920.57	341.201	0.177656
	1663.4	745.327	0.448074			1944.81	578.83	0.297629
	1688.42	120.769	0.0715279			1446.88	642.145	0.443814
	1484.4	257.953	0.173776			1304.22	263.033	0.201678
	802.78	91.456	0.113924			2259.04	312.67	0.138408
	1480.1	362.306	0.244785			704.679	245.055	0.347754
	2977.01	672.631	0.225942			715.623	261.079	0.364828
	1688.03	540.528	0.320213			1780.65	177.831	0.0998684
	2716.32	239.583	0.0882014			1783	188.774	0.105874
	1844.75	720.704	0.390678		rep3	1738.84	4.299	0.00247234
	2946.91	466.269	0.158223			1400.76	32.439	0.0231581
	3786.04	917.686	0.242387			1235.44	74.65	0.060424
						476.431	21.496	0.0451188
						727.739	28.922	0.0397423
						576.094	14.461	0.0251018
						546.781	14.461	0.0264475
						2696.39	188.384	0.0698654
						1081.84	56.281	0.0520235
						880.165	75.041	0.0852579
						1197.92	301.726	0.251876
						1136.94	272.023	0.239258
						1190.88	32.049	0.026912
						1193.23	14.852	0.0124469
						1269.05	41.82	0.0329538
						631.984	125.85	0.199135
						631.202	148.518	0.235294
						742.2	15.633	0.0210631
						1382.78	11.725	0.00847928
						1176.81	1.563	0.00132817
						896.971	8.598	0.00958559
						2037.04	24.232	0.0118957
						1124.83	11.725	0.0104238

## Sheet: F
rep1
scr	EdU	DAPI		shTg2	EdU	DAPI
1	17	47		1	16	39
2	16	52		2	10	28
3	10	29		3	7	29
4	12	21		4	6	21
5	7	32		5	14	41
6	12	22		6	12	34
7	13	29		7	8	32
8	5	19		8	13	42
9	6	15		9	4	26
10	8	22		10	8	60
SUM	106	288		SUM	98	352
%		36.8056		%		27.8409
rep2
scr	EdU	DAPI		shTg2	EdU	DAPI
1	11	28		1	6	50
2	14	33		2	1	49
3	11	27		3	9	71
4	12	37		4	9	33
5	15	33		5	5	26
6	10	31		6	5	33
7	13	32		7	9	37
8	14	33		8	7	32
9	15	29		9	7	35
10	16	35		10	9	31
SUM	131	318		SUM	67	397
%		41.195		%		16.8766
rep3
scr	EdU	DAPI		shTg2	EdU	DAPI
1	16	46		1	5	29
2	16	69		2	5	39
3	17	84		3	6	59
4	15	35		4	2	15
5	16	33		5	1	20
6	17	27		6	5	32
7	13	35		7	2	34
8	15	30		8	5	22
9	12	28		9	2	22
10	15	29		10	8	30
SUM	152	416		SUM	41	302
%		36.5385		%		13.5762

## Sheet: G
	removed from analysis due to inadequate bead tracking
	MV- scrambled								MV- shtg2
	Replicate 1								Replicate 1
Cell #	m2	um2	N	nN	Pa	kPa		Cell #	m2	um2	N	nN	Pa	kPa
1	1.459e-09	1459	3.935e-07		269.705			1	7.236e-10	723.6	3.73e-06		5154.78
2	3.795e-09	3795	9.911e-06		2611.59			2	1.025e-09	1025	1.23e-06		1200
3	1.594e-09	1594	6.225e-07	622.5	390.527	0.390527		3	1.697e-09	1697	1.35e-06	1350	795.522	0.795522
4	2.085e-09	2085	1.194e-05		5726.62			4	1.082e-09	1082	3.223e-06	3223	2978.74	2.97874
5	1.506e-09	1506	7.339e-06		4873.17			5	1.401e-09	1401	2.766e-07		197.43
6	1.759e-09	1759	2.544e-06		1446.28			6	1.035e-09	1035	3.32e-06		3207.73
7	2.074e-09	2074	9.414e-07	941.4	453.905	0.453905		7	7.357e-10	735.7	1.49e-06		2025.28
8	2.24e-09	2240	2.003e-05	20030	8941.96	8.94196		8	6.588e-10	658.8	1.191e-06		1807.83
9	2.234e-09	2234	7.482e-07	748.2	334.915	0.334915		9	8.563e-10	856.3	9.704e-06		11332.5
10	2.333e-09	2333	7.552e-06	7552	3237.03	3.23703		10	1.289e-09	1289	8.251e-07		640.109
11	1.193e-09	1193	1.931e-06	1931	1618.61	1.61861		11	6.226e-10	622.6	1.27e-06		2039.83
12	1.35e-09	1350	5.693e-07	569.3	421.704	0.421704		12	8.989e-10	898.9	6.659e-07		740.794
13	1.403e-09	1403	8.078e-07		575.766			13	2.549e-09	2549	1.894e-06	1894	743.036	0.743036
14	1.78e-09	1780	2.292e-07	229.2	128.764	0.128764		14	6.897e-10	689.7	2.756e-06		3995.94
15	1.623e-09	1623	6.911e-06		4258.16			15	8.612e-10	861.2	4.808e-07	480.8	558.291	0.558291
16	2.55e-09	2550	6.336e-06	6336	2484.71	2.48471		16	1.32e-09	1320	3.119e-07	311.9	236.288	0.236288
17	2.869e-09	2869	7.6e-06	7600	2649.01	2.64901		17	6.389e-10	638.9	6.125e-07	612.5	958.679	0.958679
18	4.332e-09	4332	1.726e-05	17260	3984.3	3.9843		18	1.236e-09	1236	1.042e-06	1042	843.042	0.843042
19	2.357e-09	2357	3.51e-06	3510	1489.18	1.48918			Replicate 2
20	1.277e-09	1277	4.443e-06	4443	3479.25	3.47925		Cell #	m2	um2	N	nN	Pa	kPa
21	1.524e-09	1524	7.734e-07		507.48			1	1.804e-09	1804	9.732e-07	973.2	539.468	0.539468
22	2.469e-09	2469	2.181e-05		8833.54			2	1.041e-09	1041	7.013e-07	701.3	673.679	0.673679
23	1.607e-09	1607	1.82e-06		1132.55			3	7.25e-10	725	5.284e-07	528.4	728.828	0.728828
24	1.364e-09	1364	3.296e-06		2416.42			4	1.641e-09	1641	1.134e-06	1134	691.042	0.691042
	Replicate 2							5	2.271e-09	2271	1.152e-06	1152	507.266	0.507266
Cell #	m2	um2	N	nN	Pa	kPa		6	9.097e-10	909.7	3.77e-06	3770	4144.22	4.14422
1	3.569e-09	3569	8.829e-06		2473.8			7	1.677e-09	1677	7.626e-07	762.6	454.741	0.454741
2	2.005e-09	2005	1.763e-06	1763	879.302	0.879302		8	1.096e-09	1096	3.217e-07	321.7	293.522	0.293522
3	1.504e-09	1504	9.212e-07	921.2	612.5	0.6125		9	1.121e-09	1121	7.351e-07	735.1	655.754	0.655754
4	1.56e-09	1560	4.484e-07	448.4	287.436	0.287436		10	1.824e-09	1824	3.132e-06	3132	1717.11	1.71711
5	2.35e-09	2350	2.667e-06	2667	1134.89	1.13489		11	7.033e-10	703.3	2.026e-08	20.26	28.8071	0.0288071
6	1.669e-09	1669	4.936e-07	493.6	295.746	0.295746		12	6.412e-10	641.2	2.693e-07	269.3	419.994	0.419994
7	1.647e-09	1647	2.756e-07	275.6	167.335	0.167335		13	1.066e-09	1066	6.257e-07	625.7	586.961	0.586961
8	1.782e-09	1782	9.575e-07	957.5	537.318	0.537318		14	2.087e-09	2087	2.075e-06	2075	994.25	0.99425
9	2.392e-09	2392	1.204e-06	1204	503.344	0.503344		15	1.007e-09	1007	2.666e-06		2647.47
10	1.473e-09	1473	8.083e-07	808.3	548.744	0.548744		16	1.684e-09	1684	2.758e-06	2758	1637.77	1.63777
11	1.61e-09	1610	1.63e-06	1630	1012.42	1.01242		17	2.389e-09	2389	2.896e-06		1212.22
12	4.66e-09	4660	5.892e-06	5892	1264.38	1.26438		18	1.724e-09	1724	1.475e-06		855.568
13	2.246e-09	2246	1.3e-06	1300	578.807	0.578807		19	1.054e-09	1054	1.205e-06		1143.26
14	1.122e-09	1122	1.227e-06	1227	1093.58	1.09358		20	9.04e-10	904	5.486e-07		606.858
15	1.161e-09	1161	2.996e-07	299.6	258.053	0.258053		21	8.003e-10	800.3	4.025e-07	402.5	502.936	0.502936
16	2.518e-09	2518	9.297e-07	929.7	369.222	0.369222		22	6.958e-10	695.8	4.168e-07	416.8	599.023	0.599023
17	1.298e-09	1298	7.209e-07	720.9	555.393	0.555393		23	9.427e-10	942.7	6.442e-07	644.2	683.356	0.683356
18	1.772e-09	1772	6.901e-07	690.1	389.447	0.389447		24	6.707e-10	670.7	1.599e-06		2384.08
19	1.863e-09	1863	1.069e-06	1069	573.806	0.573806			Replicate 3
20	1.444e-09	1444	6.982e-07	698.2	483.518	0.483518		Cell #	m2	um2	N	nN	Pa	kPa
21	1.539e-09	1539	1.275e-06	1275	828.46	0.82846		1	7.344e-10	734.4	1.142e-06		1555.01
22	1.265e-09	1265	1.612e-06	1612	1274.31	1.27431		2	1.099e-09	1099	1.055e-07		95.9964
23	1.387e-09	1387	6.147e-07	614.7	443.187	0.443187		3	1.694e-09	1694	8.798e-07	879.8	519.362	0.519362
24	1.88e-09	1880	1.318e-06	1318	701.064	0.701064		4	1.944e-09	1944	7.162e-07	716.2	368.416	0.368416
	Replicate 3							5	1.549e-09	1549	1.928e-06		1244.67
Cell #	m2	um2	N	nN	Pa	kPa		6	6.607e-10	660.7	7.346e-07		1111.85
1	1.247e-09	1247	4.628e-07		371.131			7	2.549e-09	2549	2.401e-06	2401	941.938	0.941938
2	1.596e-09	1596	2.862e-07		179.323			8	9.365e-10	936.5	1.024e-07		109.343
3	8.699e-10	869.9	2.961e-06	2961	3403.84	3.40384		9	1.97e-09	1970	6.563e-07	656.3	333.147	0.333147
4	2.292e-09	2292	8.933e-06	8933	3897.47	3.89747		10	9.296e-10	929.6	6.898e-08		74.204
5	1.095e-09	1095	9.858e-07	985.8	900.274	0.900274		11	1.099e-09	1099	2.889e-07		262.875
6	1.558e-09	1558	9.877e-07	987.7	633.954	0.633954		12	2.289e-09	2289	1.5e-06		655.308
7	2.377e-09	2377	8.83e-07		371.477			13	1.071e-09	1071	1.799e-06		1679.74
8	3.501e-09	3501	1.185e-06	1185	338.475	0.338475		14	1.591e-09	1591	9.279e-08	92.79	58.3218	0.0583218
9	1.502e-09	1502	6.892e-07	689.2	458.855	0.458855		15	1.495e-09	1495	2.613e-07	261.3	174.783	0.174783
10	1.592e-09	1592	3.847e-07	384.7	241.646	0.241646		16	1.658e-09	1658	8.95e-07		539.807
11	3.443e-09	3443	5.484e-06	5484	1592.8	1.5928		17	1.815e-09	1815	7.434e-07		409.587
12	1.138e-09	1138	2.637e-07		231.722			18	1.247e-09	1247	1.24e-06		994.387
13	2.376e-09	2376	6.772e-06	6772	2850.17	2.85017		19	7.489e-10	748.9	1.719e-06		2295.37
14	1.244e-09	1244	2.251e-06	2251	1809.49	1.80949		20	8.571e-10	857.1	1.744e-06		2034.77
15	8.543e-10	854.3	1.529e-06		1789.77			21	9.108e-10	910.8	2.912e-07	291.2	319.719	0.319719
16	1.578e-09	1578	7.422e-07		470.342			22	1.09e-09	1090	9.156e-08		84
17	2.401e-09	2401	7.311e-07	731.1	304.498	0.304498		23	9.826e-10	982.6	2.164e-07	216.4	220.232	0.220232
18	1.521e-09	1521	1.017e-06	1017	668.639	0.668639		24	1.759e-09	1759	1.187e-06	1187	674.815	0.674815
19	1.275e-09	1275	2.263e-06	2263	1774.9	1.7749		25	7.074e-10	707.4	6.514e-07	651.4	920.837	0.920837
20	6.239e-09	6239	1.838e-05	18380	2945.98	2.94598		26	1.167e-09	1167	5.646e-07		483.805
21	1.667e-09	1667	1.19e-06	1190	713.857	0.713857		27	9.415e-10	941.5	4.725e-07		501.859
22	2.226e-09	2226	5.685e-06	5685	2553.91	2.55391
23	1.639e-09	1639	2.568e-06	2568	1566.81	1.56681
24	1.662e-09	1662	3.617e-06	3617	2176.29	2.17629
25	3.092e-09	3092	1.273e-05	12730	4117.08	4.11708
26	1.302e-09	1302	2.208e-06	2208	1695.85	1.69585
27	1.776e-09	1776	1.75e-06	1750	985.36	0.98536

## Sheet: I
	071719_E_asmagapdh_pico_15sec		110919_blot1_dura		112119_blot1_good loading!
	DMSO_1	T1O1_1	DMSO_2	T101_2	DMSO_3	T101_3
aSMA	2630.2	1227.89	1694.72	302.506	742.062	112.364
GAPDH	4293.69	4056.98	7603.59	2843.33	2612.86	2231.33
aSMA/GAPDH	0.612574	0.302661	0.222884	0.106392	0.284004	0.0503575
Normalized	1	0.494081	1	0.47734	1	0.177313

## Sheet: J
	Area index after 48h
	MDA-(scr)+3T3	MDA-(scr)+3T3+MV-(scr)	MDA-(shtg2)+3T3	MDA-(shtg2)+3T3+MV-(shtg2)	MDA-(shtg2)+3T3+MV-(scr)
Rep1	3.72075	3.56171	1.72621	3.09701	2.25838
	2.6809	4.19308	2.42879	3.57978	2.12889
	3.36842	3.09513	3.28589	3.68651	1.51671
	2.84734	4.79297	2.97192	4.28271	2.82062
	2.33278	7.68324	2.41425	3.64374	4.19045
	1.5626	8.14143	2.89518	4.45102	3.4815
	2.41653	3.82723	3.22982		3.8099
	2.5622	4.54969	3.023
Rep2	2.93297	4.18799	5.51426	5.60371	2.43462
	3.19145	2.85944	5.21301	3.33878	1.1897
	2.35692	4.2809	3.58191	2.30119	1.11645
	3.57662	1.68438	3.57764	3.98711	1.55506
	2.35033	3.22131	7.22386	7.83497	1.85996
	2.88816	2.40202	3.50635	5.20185	1.21809
	1.37941	2.25774	3.07799	5.0355	2.58697
			4.07559	3.76075	2.33574
Rep3	1.47097	1.65166	1.57232	2.05446	3.57324
	1.28812	2.13788	1.67123	2.2443	4.19961
	5.63502	3.54825	4.51499	2.45895	3.64242
	0.797841	1.97254	1.97286	1.7517	4.08321
	3.07455	4.49607	1.85475	2.64386	2.44306
	2.61999	5.17292	2.56406	2.35741	3.31246
	1.63809	5.12886	2.02485	2.40789	3.4918
	1.93772	6.96944	2.1692	2.11927	2.92532
Rep3			1.50496	0.756159	3.88903
			1.09679	0.962341	2.477
			1.22658		3.19366
			0.843242	0.594638	3.05572
			0.928579	1.13864	4.80413
			1.24818	1.4822	2.27288
			0.760541	0.623608
			1.17946	1.15063	2.84018
Rep5			2.62351	1.39347	3.02907
			2.20796	2.26641	3.21353
			2.30233	2.16275	3.67292
			2.38064	3.64398	3.57555
			2.23218	3.64865	4.29894
			3.07556	4.17979	3.31787
			2.96564	2.64249	4.27974
			2.75685	3.49035
Rep6			1.49505	0.873888
			1.18649	0.986988
			2.16021	0.927074
			0.381045	1.38917
			2.48958	2.80796
			2.13117	1.86257
			2.8744	1.63657
Rep7			0.69019	1.19885
			0.960845	0.663188
			1.65653	1.20704
			0.436435	1.93233
			1.57981	1.92058
			0.935672	1.39199
			1.13762	1.08657
			1.61243	2.07218
Rep8			0.738196	0.679025
			1.25577	0.729554
			1.02168	0.817279
			0.919535	0.583536
			0.555534	0.88044
			0.952279	0.987082
			0.674014	1.11214
				0.844797
Rep9			1.71078
			2.40424
			1.92673
			3.28117
			1.65373
			2.22734
			1.84053
			1.41511
Rep10			2.30709
			1.72193
			3.45527
			1.9256
			2.24657
			2.55562
			2.22003
Rep11			2.68081
			3.45268
			1.75942
			3.10403
			2.30198
			2.18536
