# Supplementary material for: Weakly migratory metastatic breast cancer cells activate fibroblasts via microvesicle-Tg2 to facilitate dissemination and metastasis
Source: eLife journal article supplement (doi:10.7554/elife.74433), 2022-12-06
Supplement: supp [file Source Data Figure 5.xlsx]

## Sheet: B
	AFTER REMOVAL
	SHORT (mm)	LONG (mm)	VOLUME (mm3)
SCR1	5.18	10.38	139.26
SCR3	4.56	6.58	68.4109
SCR5	6.02	9.89	179.209
SCR7	5.08	6.19	79.8708
SHTG2 2	4.78	5.68	64.8895
SHTG2 4	6.16	7.26	137.743
SHTG2 6	6.4	7.54	154.419
SHTG2 8	5.98	10.41	186.133

## Sheet: C
AFM of primary tumors. All values in kPa
	Date of poke:	83120		Date of poke:	83120		Date of poke:	83120		Date of poke:	83130		Date of poke:	91020		Date of poke:	91020		Date of poke:	91020		Date of poke:	91020
	Cantilever used:	35 -old tip		Cantilever used:	35 - new tip		Cantilever used:	35 - new		Cantilever used:	35-new		Cantilever used:	35-new		Cantilever used:	35-new		Cantilever used:	35-new		Cantilever used:	35-new
	Tumor:	plko1		Tumor:	shtg2 4		Tumor:	shtg2 6		Tumor:	plko7		Tumor:	shtg2_2		Tumor:	plko_3		Tumor:	plko_5		Tumor:	shtg2_8
		Stiffness Values			Stiffness Values			Stiffness Values			Stiffness Values			Stiffness Values			Stiffness Values			Stiffness Values			Stiffness Values
	fmap04	2.32		fmap07	1.51		fmap09	1.8		fmap11	0.88771		fmap0	0.8778		first poke	3.75		fmap06	2.62		fmap02	0.75471
		3.03			1.16			2.79			1.59			0.66588		fmap04	2.62			2.28			0.74062
		2.49			1.21			13.18			1.91			0.76719			6			2.09			0.79582
		2.06			1.61			4.56			1.2			0.74472			7.2			2.49			1.87
		2.26			1.29			3.87			0.67134			0.7376			3.07			3.31			0.9969
		1.43			1.14			3.76			1.59			0.84079			1.78		fmap07	2.89			0.75626
		0.92474			1.22			4.54			1.4			0.97268			2.42			8.11			0.68987
		2.72			1.41			5.34			1.27			0.30527			1.97			8.85			0.8306
		6.15			1.6			3.66			1.76			0.54389			3.46		fmap08	5.46			0.31482
		1.01			1.05			2.02			1.26			1.02			4.9			2.24			0.35596
		1.93			1.08			0.39403			1.61			0.99396			3.48			2.34			0.54954
		1.64			0.91179			3.9			1.32			0.88902			3.3			9.52			0.77612
		0.70249			1.18			1.25			1.1			0.80454			2.74			8.58			0.84582
		1.22			1.14			2.7			1.27			0.60863			2.36			1.28			0.75666
		0.87045			0.61924			3.81			1.1			0.75271			4.1			3.71			0.81246
		0.92224			0.62194			1.83			1.4			0.75713			3.36			3.53			0.85681
		3.73			0.66353			0.27805			1.25			0.78753			4.16			1.03			0.83235
		2.47			0.74593			3.81			1.65			0.72726			1.44			0.47459			0.90585
		2.7			0.68493			4.94			1.03			0.85617			1.12			9.2			0.97253
		0.74471			0.49661			4.45			1.67			0.90159			3.37			1.09			0.89539
		0.76685			0.8432			3.17			1.49			1.02			2.29			3.04			0.34022
		1.01			1.58			3.62			0.70257			0.97235			1.77			0.69111			0.68119
		4.12			1.13			4.43			0.68641			1.08			1.36			1.7			0.43478
		6.28			1.38			3.44			2.28			0.7568			1.41			1.86			0.43279
		3.53			0.79369			2.77			1.06			0.70598			1.16			1.41			0.69403
		1.02			1.18			2.67			2.97			0.78321			0.79586			1.31			0.57184
		1.56			1.01			2.77			1.98			0.76298			1.16			1.19			1.28
		1.15			1.59			3.96			2.07			0.79479			1.39			2.26			1.18
		1.98			1.58			2.98			1.4			0.7767			1.39			2.07			0.9945
		1.52			1.58			2.48			3.19			0.77138			1.76		fmap09	4.58			0.87519
		2.16			1.42			2.14			2.14			0.79122			2.26			1.03			0.86469
		1.39			0.82658			2.66			1.61			0.85976			1.76			3.71			0.91601
		2.2			1.1			5.06			1.97			0.93314			1.72			3.4			1.02
		1.74			1.53			2.61			1.27			0.6803			1.19			1.9			1.27
		8.98			1.23			1.79			0.65026			0.8919			2.29			1.4			2.02
		7.46			1.56			1.81			0.66004			0.98045			1.74			2.06			0.47043
		1.31			1.71			1.93			1.75			0.94133			1.13			3.21			0.51763
		2.12			0.63516			1.98			1.62			0.85897			1.2			3.12			0.45909
		1.57			0.62744			1.63			0.68051			0.7945			1.56			1.92			0.4399
	fmap05	10.76			1.72			1.57			2.03			0.75195			1.64			1.26			0.77769
		4.86			0.67482			1.52			1.01			0.76339			1.82			1.86			1.74
		3.87			0.88344			1.53			1.5			0.83285		fmap05	1.11			1.64			1.43
		6.38			1.24			0.833			1.97			0.83133			3.43			1.41			1.13
		4.96			1.04		fmap10	1.02			1.88			0.83925			1.71			1.37			1.25
		4.67		map08	0.58413			1.09			1.77			0.87413			1.25			1.11			1.77
		4.22			1.11			1.28			0.56349			0.89695			1.32			1.18			1.24
		3.57			0.41229			1.4			0.83176			0.82335			1.93			1.66			1
		7.28			0.59722			1.39			1.12			0.8497			1.57			1.83			1.07
		1.04			0.61693			1.34			0.88099			0.87463			1.64			1.32			1.24
		6.11			0.76942			1.26		fmap12	0.79331			0.89834			1.7			1.53			1
		4.51			0.61566			1.36			1.59			0.85873			1.46			2.42			0.82642
		4.52			0.79494			1.41			1.33			1.02			1.33			2.48			0.86234
		4.63			0.75309			1.3			1.01		fmap01	0.55316			1.12			2.46			0.97522
		4.64			0.35393			1.42			0.80009			0.55484			1.1			2.48			0.55339
		5.13			0.49002			1.59			1.29			0.36788			1.46			2.13			0.506
		1.47			0.61157			1.39			1.73			0.67649			0.90697			1.47			0.74227
		3.37			0.61646			1.2			0.97072			0.47408			1.24			1.32			1.03
		3.23			0.57626			1.04			0.78117			0.43921			1.32			0.97847			0.81152
		3.75			0.81252			0.91425			0.60665			0.51068			1.25			2.24			2.68
		13.98			0.47737			0.81953			0.81485			0.52866			1.35			2.19			1.08
		3.63			0.62382			1.1			0.7902			0.56276			1.59			2.58			1.21
		5.63			0.50618			1.27			0.80516			0.42777			2.31			2.43		fmap03	2.17
		2.06			0.48841			1.8			0.59821			0.61067			2.48			3.31			2.06
		2.05			0.409			1.52			0.53294			0.51213			2.08			1.9			2.2
		3.4			0.37619			1.86			0.46512			0.51091			2.85			4.92			1.3
		4.38			0.43845			1.52			0.36503			0.51721			1.85			3.24			1.2
	fmap06	2.61			0.41063			1.56			0.51626			0.5439			1.55			18.68			0.79113
		4.51			0.65515			1.32			0.56664			0.48668			1.3			2.02			1.56
		3.18			0.64076			1.81			0.69609			0.45969			1.16			11.07			1.33
		3.04			0.4343			2.26			0.73099			0.48807			1.76			2.14			1.7
		3.04			0.60089			2.89			0.74626			0.42164			1.39			5.09			1.83
		3.16			0.24432			3.34			0.76934			0.44069			1.26			12.18			1.76
		4.57			0.54497			1.29			0.82695			0.45858			1.73			12.47			1.69
		4.96			0.4907			1.28			0.7386			0.39035			2.23			5.68			2.03
		4.73			0.52958			1.57			0.65659						2.77			4.31			1.67
		4.99			0.52553			1.58			0.74637						1.87			9.23			1.15
		0.99239			0.46964			1.67			0.67397						1.62			1.64			1.15
		1.59			0.29131			2.95			0.862						1.64			1.41			0.52091
		1.1			0.33364			1.87			0.5803						2.39			1.3			0.39424
		1.89			0.9259			1.64			0.55196						1.84						0.92379
		3.27			0.95959			0.99189			0.66483						1.73						1.07
		5.56			0.76496			1.59			0.75864						1.84						1.17
		2.81			0.73979			1.22			0.59415						1.1						0.88266
		4.77			0.54554			1.27			0.472						1.51						1.2
		5.51			0.55442			1.08			1.12						1.25						1.83
		7.3			0.63243			1.5			0.55942						1.16						1.38
		2.7			0.71222			2.26			0.53997						1.32						1.34
		5.34			0.65561			1.52			0.8747						1.27						1.72
		4.77			0.53351			1.38			0.64668						1.59						1.19
		6.18			0.65158			0.88649			0.866241						1.14						1.64
		8.42			0.65337			0.96946			0.57843						1.27						1.82
		9.8			1.18						0.67945						1.11						0.996
		4.79			1.2						0.51852						1.02						0.9314
		0.69283			1.14						0.5088						1.12						0.98802
		1.98			1.36					fmap13	1.29						1.15						1.55
		2.05			1.17						0.96733						0.97504						1.84
		3.11									0.94766												0.77643
											1.12												0.6414
											1.36												2.16
											0.9998												1.67
											0.9323												1.23
											0.87784												2.02
											1.75												2.2
											1.01												1.36
											1.92												0.81065
											1.48												0.85305
											1.91												1.27
											1.46												0.54125
											0.91521												0.63481
											3.34												0.49213
											1.76												0.4315
											1.25												0.76046
											1.72												1.4
											3.08												1.82
											2.66												1.36
											1.08												1.56
											1.24												1.62
											1.6												2.9
											1.61
											1.9
											1.44
											1.07
											1.49
											1.59
											0.8682
											1.43
											0.90324
											1.5
											2.73
											3.62
											2.97
											2.92
											3.68
											2.27
											1.19
											2.11
											2.88
											2.37
											2.41
											1.45
											1.16
											1.34
											1
											0.95713
											0.95635
											0.99015
											1.15
											1.41

## Sheet: D
	plko1	plko3	plko5	plko7	shtg2	shtg4	shtg6	shtg8
DAPI area	5.63369e+06	3.20666e+06	2.19363e+06	4.89944e+06	2.45752e+06	5.59558e+06	1.12816e+07	7.37347e+06
RFP area	1.84922e+06	638392	1.06588e+06	2.55507e+06	530582	1.36784e+06	870643	832493
RFP/DAPI	0.328243	0.199083	0.485896	0.521502	0.215902	0.24445	0.0771739	0.112904
DAPImin	9252
DAPImax	65535
RFPmin	17219
RFPmax	65535

## Sheet: J
	% of lung tissue GFP+
	scr	shtg2
M1 section1	95	9	M2 section1
M1 section2	62.05	37.98	M2 section2
M3 section1	64	44	M4 section1
M3 section2	45.39	72.8	M4 section2
M5 section1	75	28	M6 section1
M5 section2	95.57	64.71	M6 section2
M7 section1	54	79	M8 section1
M7 section2	72.65	45	M8 section2

## Sheet: K
	% of liver tissue GFP+
	scr	shtg2
M1 section1	56.6336	11.5379	M2 section1
M1 section2	56.06	6.5	M2 section2
M3 section1	14.4119	17.8422	M4 section1
M3 section2	11.4	12.17	M4 section2
M5 section1	27.9342	13.9526	M6 section1
M5 section2	29.4	9.08	M6 section2
M7 section1	30.0628	33.3826	M8 section1
M7 section2	28.48	26	M8 section2
