# Supplementary material for: Weakly migratory metastatic breast cancer cells activate fibroblasts via microvesicle-Tg2 to facilitate dissemination and metastasis
Source: eLife journal article supplement (doi:10.7554/elife.74433), 2022-12-06
Supplement: supp [file Source Data Figure 6 - SuppFig1.xlsx]

## Sheet: B
		AFTER REMOVAL
		SHORT (mm)	LONG (mm)	VOLUME (mm3)
	MV1	2.77	8.7	33.3771	- removed because mouse sac'd one week early
	SF2	3.11	4.45	21.5204
	MV3	2.98	4.25	18.8709
	SF4	2.97	7.79	34.3574
	MV5	4.59	7.77	81.8496
	SF6	3.53	4.29	26.7286
	MV7	3.22	3.3	17.1079
	SF8	2.89	4.35	18.1658
	MV9	4.99	5.3	65.9853
	SF10	3.05	4.06	18.8841

## Sheet: C
Mouse	Treatment	Total Cells	Negative Cells	Positive Cells	Positive %	Area (mm^2)	Positive per Area	Cell Distances Summed (um)	Weighted Average (Cell # * Distance to Tumor/Area) - cell/mm	Total Cell Distances Summed (um)	Ratio of Positive Distances to All Distances	Total Picrosirius Stain Score
M2	SF	9262	9121	141	1.52235	5.505	25.6144	58823.2	10.686	5.04773e+06	0.0117	16
M3	MV	3597	2755	842	23.4084	2.32	362.909	98987.2	42.664	575530	0.172	15
M4	SF	11953	10811	1142	9.55409	9.793	116.613	1.02619e+06	104.787	8.37568e+06	0.1225	12
M5	MV	18520	15422	3098	16.7279	9.868	313.954	3.02103e+06	306.153	1.74763e+07	0.1729	20
M6	SF	15135	14884	251	1.65841	4.997	50.2294	163849	32.789	1.46332e+07	0.0112	12
M7	MV	4381	4142	239	5.45538	1.552	153.967	59487.3	38.322	1.82551e+06	0.0326	15
M8	SF	9485	9108	377	3.9747	2.63	143.351	233093	88.631	6.28345e+06	0.0371	14
M9	MV	11288	10165	1123	9.94862	6.168	182.083	806776	130.811	7.03097e+06	0.1147	12
M10	SF	16390	15705	685	4.17938	6.744	101.573	657534	97.501	2.02568e+07	0.0325	18
