# Supplementary material for: Weakly migratory metastatic breast cancer cells activate fibroblasts via microvesicle-Tg2 to facilitate dissemination and metastasis
Source: eLife journal article supplement (doi:10.7554/elife.74433), 2022-12-06
Supplement: supp [file Source Data Figure 6.xlsx]

## Sheet: B
	SET1 - AFTER REMOVAL
	SHORT (mm)	LONG (mm)	VOLUME (mm3)
SF1	4.75	9.28	104.69
SF3	4.87	10.11	119.889
SF5	4.73	9.85	110.187
SF7	8.15	9.9	328.791
MV2	9.99	10.25	511.476
MV4	8.59	9.34	344.59
MV6	7.99	11.33	361.654
MV8	9.97	14.09	700.279
	SET2 - AFTER REMOVAL
	SHORT (mm)	LONG (mm)	VOLUME (mm3)
SF1	7.59	11.02	317.421
SF3	6.6	10.1	219.978
MV5	7	9.85	241.325
MV7	7.78	8.04	243.324
SF9	5.55	8.47	130.449
SF11	5.12	7.3	95.6826
MV13	7.53	8.55	242.396
MV15	6.02	8	144.962

## Sheet: C
AFM stiffness values in kPa
Date of poke:	04-03-2021		Date of poke:	04-03-2021		Date of poke:	04-17-2021		Date of poke:	04-17-2021		Date of poke:	04-17-2021		Date of poke:	4-18-2021		Date of poke:	4-19-2021
Cantilever used:	33		Cantilever used:	33		Cantilever used:	33		Cantilever used:	33		Cantilever used:	33		Cantilever used:	35		Cantilever used:	33
Tumor:	MV2		Tumor:	SF1		Tumor:	SF3		Tumor:	SF5		Tumor:	SF1		Tumor:	MV4		Tumor:	MV6
	Stiffness Values			Stiffness Values			Stiffness Values			Stiffness Values			Stiffness Values			Stiffness Values			Stiffness Values
	0.7404			0.24236			0.30739			0.439			0.22605			1.88			0.71468
	0.60506			0.24488			0.29881			0.83392			0.3148			0.98808			0.50804
	0.53082			0.23127			0.12252			1.84			2.93			1.78			0.51239
	1.1			0.20887			0.2967			0.31408			0.25394			0.83073			0.57815
	0.77935			0.97961			0.31597			1.36			3.3			2.12			0.67513
	0.55727			1.06			0.188			0.37147			0.26959			1.2			0.48413
	0.78206			0.28516			0.19257			0.38823			0.25604			0.62677			0.42536
	0.87552			0.21121			0.13694			0.31708			0.11865			0.6533			0.55309
	1.59						0.25851			0.41577			0.36434			0.98019			0.81137
	1.76						0.26662			0.39417			0.28337			3.01			1.13
	1.66						0.48062			0.31526			0.34677			0.4582			1.28
	1.81						0.28797			0.37017			0.22897			0.67689			0.95606
	0.58047						0.23383			0.36686			0.44632			0.59316			0.40319
	2.39						0.26934			1.15						0.43201			0.30971
	1.53						0.21308			0.63638						0.70531			0.86275
	1.43						0.35361			0.63983						0.62497			0.99889
	0.74275						0.70371			0.62093						0.73802			0.70386
	0.86045						0.49916			0.61263						1.15			0.63435
	1.03						0.16856			0.34332						0.65858			0.58344
	0.76664						0.38328			0.41199						0.28844			0.45791
	0.79664						0.20756			0.58847						0.35566			0.5495
	2.51						0.27112			0.41898						0.44874			0.70718
	2.8						0.54034			0.3273						0.77826			1
	2.82						0.3198			0.3931						0.77632			0.63529
	2.51						0.24629			0.53108						0.95104			0.5288
	1.25						0.30752			0.75993						0.8409			0.61436
							0.12914			0.80191						0.70105			0.48444
							0.24946			0.37398						0.90215			0.70294
							0.12639			0.65328						0.64454			1.09
							0.35751			0.8185						1.03			0.99772
							0.24946			0.85862						1.74			0.60083
							0.28973			0.74529						0.42468			0.85803
							0.21448			0.78367						0.26721			0.73209
							0.20881			0.95396						0.45675			0.68208
							0.18397			0.89527						1.16			0.66542
							0.20956			0.46909						0.3093			0.84369
							0.17421			0.44719						0.27347			0.85696
							0.27249			0.47711						0.54953			0.66693
							0.26808			0.46318						0.89462			0.75727
							0.31981			0.72506						1.86			1.01
							0.27805			0.62132						0.91565			1.02
							0.2571			0.52426						1.55		some single froces	1.02
										0.71849						2.43			0.48484
										0.88878						2.29			0.84626
										0.90167						0.83495			0.29794
										0.8049						1.14			0.823
										0.50146						1.36		fmap03	0.77993
										0.72169						0.56856		mostly bad	0.72081
										0.58604						1.17			0.93421
										0.51929						0.68584			0.71364
										0.51599						0.44749			0.84417
										0.56304						0.60489			0.96527
										0.21003						1.14			0.74031
										0.69135						0.79323			0.61613
										1.2						0.51605			0.7052
										1.1						0.50657			1.14
										1.56						0.44678
									FMAP06	0.23232						0.39718
									8x8, 120 um	0.39156
									not as good as previous one	0.42267
										0.21294
										0.15572
										0.27224
										1.05
										0.58505

## Sheet: D
	MV2	MV4	MV6	SF3	SF5	SF7
DAPI area	6.15401e+06	6.38794e+06	1.25081e+07	9.98158e+06	2.05984e+06	4.31358e+06
RFP area	2.60836e+06	1.84535e+06	3.58466e+06	2.26723e+06	399391	718433
RFP/DAPI	0.423847	0.28888	0.286588	0.227141	0.193894	0.166551
DAPImin	9252
DAPImax	65535
RFPmin	18247
RFPmax	65535
RFPmin2	32105

## Sheet: J and K
	% Positive Area			% Positive Area
E75A_MV2_Liver	8.7333		E75A_SF1_Liver	25.2473
E75A_MV2_Lung	40		E75A_SF1_Lung	20
E75A_MV4_Liver	23.0629		E75A_SF5_Liver	2.58614
E75A_MV4_Lung	42		E75A_SF5_Lung	25
E75A_MV6_Liver	49.872		E75A_SF7_Liver	8.20222
E75A_MV6_Lung	58		E75A_SF7_Lung	33
E75A_MV8_Liver	1.07944
E75A_MV8_Lung	29
E75B_NONMV13_Liver	3.89099		E75B_SF3_Liver	1.94454
E75B_NONMV13_Lung	25		E75B_SF3_Lung	20
E75B_NONMV15_Liver	19.9154		E75B_SF9_Liver	26.6964
E75B_NONMV15_Lung	30		E75B_SF9_Lung	35
E75B_NONMV5_Liver	20.2659		E75B_SF9_Lung	2.48958
E75B_NONMV5_Lung	60		E75B_SF9_Lung	26
E75B_NONMV7_Liver	5.08819
E75B_NONMV7_Lung	33.8875
