# Supplementary material for: Weakly migratory metastatic breast cancer cells activate fibroblasts via microvesicle-Tg2 to facilitate dissemination and metastasis
Source: eLife journal article supplement (doi:10.7554/elife.74433), 2022-12-06
Supplement: supp [file Source Data Figure 7.xlsx]

## Sheet: D
Correlated Gene	Cytoband	Spearman's Correlation	p-Value	q-Value
JAK3	19p13.11	0.590745	2.24222e-91	4.48848e-87
TNFRSF1B	1p36.22	0.57258	1.02173e-84	1.02265e-80
CSF2RB	22q12.3	0.562597	3.12547e-81	2.08552e-77
LCP2	5q35.1	0.561622	6.74666e-81	3.37636e-77
KLHL6	3q27.1	0.54724	4.27468e-76	1.71141e-72
PLEKHO2	15q22.31	0.545338	1.77213e-75	5.9124e-72
PRF1	10q22.1	0.540913	4.6799e-74	1.33832e-70
SASH3	Xq26.1	0.540003	9.12349e-74	2.28293e-70
TRPV2	17p11.2	0.539027	1.8615e-73	4.1404e-70
PTPN7	1q32.1	0.538155	3.51529e-73	7.03692e-70
WIPF1	2q31.1	0.537835	4.43525e-73	8.07135e-70
ARHGAP25	2p13.3	0.537094	7.59781e-73	1.26744e-69
SNX20	16q12.1	0.536879	8.87866e-73	1.36718e-69
CD53	1p13.3	0.536556	1.12174e-72	1.60393e-69
ITK	5q33.3	0.535055	3.31506e-72	4.42405e-69
CD3E	11q23.3	0.533717	8.66302e-72	1.08385e-68
CD96	3q13.13-q13.2	0.533045	1.40216e-71	1.65109e-68
IL10RA	11q23.3	0.532026	2.90328e-71	3.22878e-68
IL2RG	Xq13.1	0.531867	3.25049e-71	3.42465e-68
SLAMF1	1q23.3	0.531541	4.10096e-71	4.10465e-68
CCR5	3p21.31	0.528795	2.86677e-70	2.73272e-67
FGR	1p35.3	0.527831	5.65212e-70	5.14292e-67
CD37	19q13.33	0.526748	1.2082e-69	1.05155e-66
LAIR1	19q13.42	0.526213	1.75751e-69	1.46591e-66
JAML	11q23.3	0.526125	1.86848e-69	1.49613e-66
SLAMF6	1q23.2-q23.3	0.525571	2.75129e-69	2.11828e-66
FERMT3	11q13.1	0.525348	3.21481e-69	2.31618e-66
IKZF1	7p12.2	0.525336	3.23974e-69	2.31618e-66
GIMAP4	7q36.1	0.525064	3.91572e-69	2.70293e-66
SLA2	20q11.23	0.524554	5.58489e-69	3.72661e-66
CD48	1q23.3	0.524178	7.25217e-69	4.68303e-66
CD5	11q12.2	0.523432	1.21684e-68	7.6121e-66
KLRD1	12p13.2	0.523249	1.38146e-68	8.38e-66
SPN	16p11.2	0.522923	1.72988e-68	1.01849e-65
CD2	1p13.1	0.522491	2.33137e-68	1.33123e-65
SAMD3	6q23.1	0.522453	2.39405e-68	1.33123e-65
CST7	20p11.21	0.52217	2.91134e-68	1.57511e-65
CLIC2	Xq28	0.522102	3.04934e-68	1.60636e-65
C16ORF54	16p11.2	0.521937	3.41856e-68	1.75468e-65
PTPRC	1q31.3-q32.1	0.521582	4.36313e-68	2.18353e-65
RASAL3	19p13.12	0.521267	5.42046e-68	2.64651e-65
SLA	8q24.22	0.520673	8.15257e-68	3.88567e-65
DOCK2	5q35.1	0.519733	1.55203e-67	7.22523e-65
CD3G	11q23.3	0.519646	1.6475e-67	7.49538e-65
HCLS1	3q13.33	0.519313	2.06876e-67	9.20275e-65
ACAP1	17p13.1	0.519175	2.27294e-67	9.89123e-65
TNFAIP3	6q23.3	0.518959	2.63325e-67	1.12154e-64
GZMA	5q11.2	0.518615	3.32986e-67	1.38869e-64
DOK2	8p21.3	0.518168	4.51398e-67	1.8441e-64
PLEK	2p14	0.518034	4.94694e-67	1.98056e-64
CD3D	11q23.3	0.517559	6.8296e-67	2.68069e-64
GIMAP5	7q36.1	0.517429	7.46336e-67	2.87311e-64
PRKCB	16p12.2-p12.1	0.517124	9.17802e-67	3.46652e-64
CXCR6	3p21.31	0.516961	1.02458e-66	3.79815e-64
TNFSF14	19p13.3	0.516322	1.57968e-66	5.71376e-64
CIITA	16p13.13	0.516305	1.59841e-66	5.71376e-64
WAS	Xp11.23	0.516242	1.66731e-66	5.85548e-64
LILRB2	19q13.4	0.514249	6.38872e-66	2.20499e-63
IL12RB1	19p13.11	0.514165	6.75915e-66	2.2933e-63
TBX21	17q21.32	0.513532	1.03317e-65	3.44699e-63
S1PR4	19p13.3	0.513182	1.30618e-65	4.28641e-63
PYHIN1	1q23.1	0.513124	1.35854e-65	4.38632e-63
PDCD1LG2	9p24.1	0.513098	1.38245e-65	4.39267e-63
TMC8	17q25.3	0.512928	1.54859e-65	4.84371e-63
CD4	12p13.31	0.512583	1.95066e-65	6.00742e-63
FLI1	11q24.3	0.512392	2.21572e-65	6.72036e-63
P2RY8	Xp22.33 and Yp11.3	0.512198	2.52179e-65	7.53449e-63
FMNL1	17q21.31	0.511715	3.47917e-65	1.02421e-62
HLA-DRA	6p21.32	0.511575	3.81899e-65	1.10795e-62
LY9	1q23.3	0.511052	5.40831e-65	1.53772e-62
GVINP1	11p15.4	0.511039	5.454e-65	1.53772e-62
CMKLR1	12q23.3	0.510992	5.62895e-65	1.565e-62
UBASH3A	21q22.3	0.510786	6.4549e-65	1.77006e-62
GAB3	Xq28	0.510757	6.57905e-65	1.77972e-62
GPR171	3q25.1	0.510538	7.60835e-65	2.03072e-62
STAT4	2q32.2-q32.3	0.510267	9.10635e-65	2.39857e-62
SIT1	9p13.3	0.510218	9.40444e-65	2.44491e-62
PIK3R5	17p13.1	0.509839	1.2094e-64	3.10381e-62
MYO1F	19p13.2	0.50947	1.54343e-64	3.91095e-62
CRTAM	11q24.1	0.508829	2.35632e-64	5.89609e-62
NCKAP1L	12q13.13-q13.2	0.508763	2.46095e-64	6.0819e-62
IL18BP	11q13.4	0.508735	2.50735e-64	6.12099e-62
CXCR3	Xq13.1	0.508613	2.717e-64	6.55288e-62
SH2D1A	Xq25	0.508484	2.9588e-64	7.05109e-62
ARHGAP9	12q13.3	0.507911	4.31574e-64	1.01638e-61
C3	19p13.3	0.5074	6.03603e-64	1.40499e-61
CCL5	17q12	0.506358	1.19541e-63	2.72474e-61
WDFY4	10q11.23	0.506354	1.19781e-63	2.72474e-61
TESPA1	12q13.2	0.50628	1.25769e-63	2.82882e-61
CD247	1q24.2	0.505798	1.7237e-63	3.8339e-61
IRF8	16q24.1	0.504457	4.12901e-63	9.08292e-61
ZNF831	20q13.32	0.504348	4.43201e-63	9.64347e-61
KLRB1	12p13.31	0.50395	5.73978e-63	1.23547e-60
LAPTM5	1p35.2	0.502602	1.3741e-62	2.92624e-60
CCR7	17q21.2	0.502528	1.44122e-62	3.03688e-60
APOL1	22q12.3	0.502069	1.93936e-62	4.04397e-60
NKG7	19q13.41	0.501176	3.44648e-62	7.11254e-60
CD74	5q33.1	0.50087	4.19402e-62	8.56693e-60
CD52	1p36.11	0.500766	4.48525e-62	9.06926e-60
GIMAP8	7q36.1	0.50045	5.49505e-62	1.1e-59
SP140	2q37.1	0.500287	6.09812e-62	1.20864e-59
IL21R	16p12.1	0.500053	7.08507e-62	1.39048e-59
SLFN12L	17q12	0.499987	7.39016e-62	1.43627e-59
SELPLG	12q24.11	0.499969	7.47693e-62	1.43917e-59
PTGIR	19q13.32	0.499705	8.8549e-62	1.68817e-59
HLA-DMA	6p21.32	0.499358	1.10589e-61	2.08846e-59
SCML4	6q21	0.499294	1.15165e-61	2.15456e-59
TIGIT	3q13.31	0.49892	1.46271e-61	2.71117e-59
HLA-DMB	6p21.32	0.498768	1.6111e-61	2.95881e-59
SIRPG	20p13	0.498713	1.66901e-61	3.0373e-59
PRKCQ	10p15.1	0.498648	1.73974e-61	3.13748e-59
LILRB1	19q13.42	0.498421	2.01059e-61	3.59356e-59
CD40	20q13.12	0.498184	2.33805e-61	4.14187e-59
FYB1	5p13.1	0.498	2.62883e-61	4.61614e-59
CYTH4	22q13.1	0.497909	2.7866e-61	4.85063e-59
FAM78A	9q34.13	0.497269	4.1842e-61	7.22064e-59
BTLA	3q13.2	0.497174	4.44515e-61	7.60539e-59
TNFRSF8	1p36.22	0.49703	4.87058e-61	8.26265e-59
TRAT1	3q13.13	0.496356	7.46205e-61	1.25525e-58
C1S	12p13.31	0.496326	7.60429e-61	1.26852e-58
CARD11	7p22.2	0.496162	8.43934e-61	1.39619e-58
LCK	1p35.2	0.496012	9.27812e-61	1.52237e-58
GZMK	5q11.2	0.495829	1.04171e-60	1.69537e-58
SERPING1	11q12.1	0.495742	1.10009e-60	1.77594e-58
IL15RA	10p15.1	0.495081	1.67015e-60	2.67465e-58
HLA-E	6p22.1	0.49495	1.81391e-60	2.88182e-58
TBC1D10C	11q13.2	0.494935	1.83061e-60	2.88545e-58
EVI2B	17q11.2	0.494623	2.22774e-60	3.48397e-58
MFNG	22q13.1	0.494124	3.04895e-60	4.73131e-58
THEMIS	6q22.33	0.494031	3.23225e-60	4.97717e-58
PARP15	3q21.1	0.493943	3.41594e-60	5.21988e-58
CD40LG	Xq26.3	0.493889	3.53554e-60	5.36169e-58
APBB1IP	10p12.1	0.493148	5.6236e-60	8.46415e-58
INPP5D	2q37.1	0.49309	5.83193e-60	8.71221e-58
CCR2	3p21.31	0.492995	6.19034e-60	9.17913e-58
SAMSN1	21q11.2	0.492541	8.22209e-60	1.21022e-57
IL18RAP	2q12.1	0.492528	8.28909e-60	1.21118e-57
NCF4	22q12.3	0.491936	1.19947e-59	1.73993e-57
HCST	19q13.12	0.491655	1.42947e-59	2.05864e-57
TMEM140	7q33	0.491628	1.45364e-59	2.07849e-57
C1R	12p13.31	0.491361	1.71693e-59	2.43756e-57
CD8A	2p11.2	0.491191	1.90845e-59	2.69037e-57
KLRK1	12p13.2	0.491147	1.96088e-59	2.74496e-57
PDCD1	2q37.3	0.490793	2.44401e-59	3.39752e-57
CD226	18q22.2	0.490752	2.50715e-59	3.46124e-57
TLR8	Xp22.2	0.490715	2.56604e-59	3.51828e-57
HLA-DPB1	6p21.32	0.490475	2.97756e-59	4.05475e-57
SLAMF7	1q23.3	0.490386	3.14733e-59	4.25697e-57
IL2RB	22q12.3	0.490151	3.64009e-59	4.89042e-57
BTK	Xq22.1	0.490107	3.74054e-59	4.99187e-57
CFH	1q31.3	0.489803	4.51686e-59	5.98798e-57
CFI	4q25	0.489517	5.39161e-59	7.1006e-57
FGD2	6p21.2	0.489271	6.27746e-59	8.21321e-57
PSTPIP1	15q24.3	0.488833	8.22837e-59	1.06958e-56
CD27	12p13.31	0.488417	1.06343e-58	1.3734e-56
LPXN	11q12.1	0.488359	1.10225e-58	1.41442e-56
SPI1	11p11.2	0.487362	2.03652e-58	2.59662e-56
VNN2	6q23.2	0.487189	2.26427e-58	2.86875e-56
MS4A4A	11q12.2	0.486994	2.552e-58	3.21295e-56
BIN2	12q13.13	0.486651	3.14978e-58	3.94076e-56
SLFN11	17q12	0.486566	3.31787e-58	4.12529e-56
SPOCK2	10q22.1	0.486517	3.42034e-58	4.22644e-56
CD6	11q12.2	0.486504	3.44631e-58	4.23241e-56
GIMAP7	7q36.1	0.486333	3.82641e-58	4.67055e-56
GPR183	13q32.3	0.486301	3.9023e-58	4.73432e-56
STX11	6q24.2	0.486276	3.96241e-58	4.77828e-56
CD300LF	17q25.1	0.48623	4.07683e-58	4.88683e-56
AOAH	7p14.2	0.485605	5.97538e-58	7.11995e-56
PCED1B-AS1	12q13.11	0.485367	6.90705e-58	8.18138e-56
GMFG	19q13.2	0.484665	1.05989e-57	1.24805e-55
LY96	8q21.11	0.484489	1.17956e-57	1.38084e-55
CD7	17q25.3	0.484479	1.18654e-57	1.38094e-55
ARHGAP30	1q23.3	0.484453	1.20567e-57	1.3951e-55
GBP4	1p22.2	0.483686	1.92207e-57	2.21126e-55
PTGER4	5p13.1	0.483532	2.10972e-57	2.41328e-55
LILRA5	19q13.42	0.48307	2.79199e-57	3.17557e-55
FASLG	1q24.3	0.482874	3.14394e-57	3.55567e-55
IL16	15q25.1	0.482786	3.31628e-57	3.72951e-55
CCL2	17q12	0.482064	5.12866e-57	5.7355e-55
GFI1	1p22.1	0.48176	6.16141e-57	6.85217e-55
LILRB3	19q13.42	0.481435	7.49634e-57	8.2907e-55
ST8SIA4	5q21.1	0.481106	9.13956e-57	1.00525e-54
CD244	1q23.3	0.48094	1.00977e-56	1.10457e-54
MPEG1	11q12.1	0.480484	1.3278e-56	1.44456e-54
GNGT2	17q21.32	0.480378	1.41542e-56	1.53156e-54
SLAMF8	1q23.2	0.480368	1.42373e-56	1.53227e-54
PIK3CD	1p36.22	0.480105	1.66687e-56	1.78435e-54
AKNA	9q32	0.47958	2.28351e-56	2.43145e-54
HSD11B1	1q32.2	0.479527	2.35738e-56	2.49682e-54
ARHGAP15	2q22.2-q22.3	0.479517	2.3718e-56	2.49888e-54
SCIMP	17p13.2	0.479235	2.80663e-56	2.94153e-54
POU2F2	19q13.2	0.47892	3.3891e-56	3.53349e-54
CD86	3q13.33	0.478663	3.95036e-56	4.08104e-54
ITGAX	16p11.2	0.478661	3.95505e-56	4.08104e-54
VCAM1	1p21.2	0.478635	4.01865e-56	4.1254e-54
GBP5	1p22.2	0.478152	5.35864e-56	5.46101e-54
VSIR	10q22.1	0.478147	5.37425e-56	5.46101e-54
CTSW	11q13.1	0.477878	6.30866e-56	6.37812e-54
ITGB2	21q22.3	0.477832	6.48544e-56	6.5239e-54
ZAP70	2q11.2	0.477495	7.92243e-56	7.92956e-54
FGL2	7q11.23	0.477047	1.03404e-55	1.02982e-53
ICOS	2q33.2	0.476877	1.14397e-55	1.13366e-53
MS4A6A	11q12.2	0.476544	1.39369e-55	1.37433e-53
PTPRCAP	11q13.2	0.476297	1.61288e-55	1.58268e-53
TMEM273	10q11.23	0.476197	1.71119e-55	1.67096e-53
ABI3	17q21.32	0.475805	2.15869e-55	2.09771e-53
NCF2	1q25.3	0.475435	2.68528e-55	2.59681e-53
HLA-DPA1	6p21.32	0.474721	4.09212e-55	3.93827e-53
ADGRE5	19p13.12	0.474664	4.23219e-55	4.05358e-53
GZMB	14q12	0.474438	4.83404e-55	4.60799e-53
TNFAIP8	5q23.1	0.47438	5.00205e-55	4.74555e-53
C1ORF162	1p13.2	0.474117	5.84098e-55	5.51532e-53
CHST11	12q23.3	0.473771	7.15863e-55	6.72777e-53
NUGGC	8p21.1	0.47359	7.95983e-55	7.44578e-53
HAVCR2	5q33.3	0.47353	8.24466e-55	7.67635e-53
IRAG2	12p12.1	0.472977	1.14e-54	1.0565e-52
SLC9A9	3q24	0.472589	1.43091e-54	1.32e-52
LYZ	12q15	0.472236	1.75925e-54	1.61545e-52
RAB33A	Xq26.1	0.471346	2.95613e-54	2.70209e-52
GBP2	1p22.2	0.470944	3.73521e-54	3.3987e-52
IL7R	5p13.2	0.470603	4.55624e-54	4.127e-52
CORO1A	16p11.2	0.470237	5.63457e-54	5.06584e-52
TNFSF13B	13q33.3	0.470233	5.64909e-54	5.06584e-52
GPR174	Xq21.1	0.470227	5.66864e-54	5.06584e-52
RGS18	1q31.2	0.469738	7.5279e-54	6.69749e-52
C1QA	1p36.12	0.469708	7.65711e-54	6.7823e-52
HCK	20q11.21	0.469622	8.04833e-54	7.09743e-52
LTA	6p21.33	0.469597	8.16762e-54	7.17102e-52
EOMES	3p24.1	0.469487	8.70479e-54	7.60928e-52
ASB2	14q32.12	0.469382	9.25012e-54	8.05082e-52
ZC3H12D	6q25.1	0.469316	9.61009e-54	8.32791e-52
SELL	1q24.2	0.469292	9.74442e-54	8.40792e-52
DOCK8	9p24.3	0.469215	1.01855e-53	8.75078e-52
AIF1	6p21.33	0.469149	1.05824e-53	9.0529e-52
CTSS	1q21.3	0.469032	1.13268e-53	9.64848e-52
XCL2	1q24.2	0.468637	1.42272e-53	1.20678e-51
ACVRL1	12q13.13	0.468446	1.58866e-53	1.34185e-51
PRDM8	4q21.21	0.468263	1.76582e-53	1.48522e-51
CD68	17p13.1	0.468226	1.80392e-53	1.51092e-51
ZEB2	2q22.3	0.468193	1.83813e-53	1.53315e-51
SLC7A7	14q11.2	0.468111	1.92778e-53	1.60125e-51
IFI16	1q23.1	0.468032	2.017e-53	1.66844e-51
PRDM1	6q21	0.467736	2.39204e-53	1.96917e-51
CCDC69	5q33.1	0.46773	2.40023e-53	1.96917e-51
CASP10	2q33.1	0.467693	2.45246e-53	2.00381e-51
IL2RA	10p15.1	0.467665	2.49157e-53	2.02749e-51
ACSL5	10q25.2	0.467603	2.58226e-53	2.09278e-51
PARVG	22q13.31	0.467239	3.18316e-53	2.56938e-51
CD69	12p13.31	0.466969	3.71739e-53	2.98854e-51
BANK1	4q24	0.466919	3.82627e-53	3.06377e-51
EVI2A	17q11.2	0.466738	4.24573e-53	3.3861e-51
NLRP1	17p13	0.466268	5.55912e-53	4.41597e-51
LINC00426	13q12.3	0.465881	6.93489e-53	5.48706e-51
C11ORF21	11p15.5	0.465857	7.03247e-53	5.54236e-51
EPAS1	2p21	0.465831	7.13891e-53	5.60418e-51
GRAP2	22q13.1	0.465712	7.63895e-53	5.9733e-51
MNDA	1q23.1	0.465438	8.93856e-53	6.96234e-51
NCF1	7q11.23	0.465422	9.01916e-53	6.99789e-51
CYTIP	2q24.1	0.464144	1.86815e-52	1.44389e-50
HLA-DOA	6p21.32	0.463738	2.35353e-52	1.81204e-50
TAGAP	6q25.3	0.463452	2.76956e-52	2.12418e-50
GIMAP6	7q36.1	0.463333	2.962e-52	2.2631e-50
LILRB4	19q13.42	0.462521	4.69326e-52	3.57223e-50
FCRL3	1q23.1	0.462296	5.3303e-52	4.04174e-50
SLC15A3	11q12.2	0.46175	7.25328e-52	5.4791e-50
CD28	2q33.2	0.46174	7.29806e-52	5.4922e-50
KCNAB2	1p36.31	0.461659	7.63785e-52	5.72639e-50
CD38	4p15.32	0.461594	7.92352e-52	5.91839e-50
ITGAL	16p11.2	0.461366	9.01051e-52	6.7053e-50
ZNF683	1p36.11	0.461121	1.03413e-51	7.6671e-50
IL32	16p13.3	0.461104	1.04406e-51	7.71218e-50
GZMM	19p13.3	0.46096	1.13244e-51	8.33427e-50
GNLY	2p11.2	0.460806	1.23514e-51	9.05682e-50
KCNA3	1p13.3	0.460547	1.42852e-51	1.04365e-49
LAX1	1q32.1	0.4603	1.64174e-51	1.19507e-49
CLEC12A	12p13.31	0.460016	1.92469e-51	1.39596e-49
IRF4	6p25.3	0.459913	2.03914e-51	1.47363e-49
PTPN22	1p13.2	0.459674	2.33148e-51	1.67883e-49
DCANP1	5q31.1	0.459569	2.47348e-51	1.7747e-49
ELMO1	7p14.2-p14.1	0.459311	2.85791e-51	2.0432e-49
MEI1	22q13.2	0.459041	3.32333e-51	2.36749e-49
DPYD	1p21.3	0.45901	3.38141e-51	2.40032e-49
LST1	6p21.33	0.458942	3.51403e-51	2.48565e-49
CCR4	3p22.3	0.458329	4.94766e-51	3.4874e-49
DPEP2	16q22.1	0.458253	5.1615e-51	3.62537e-49
THEMIS2	1p35.3	0.457713	6.97472e-51	4.88181e-49
PLA2G2D	1p36.12	0.457504	7.83389e-51	5.46407e-49
GBP1	1p22.2	0.457497	7.86702e-51	5.46813e-49
CR1	1q32.2	0.457356	8.50901e-51	5.89389e-49
CXCL9	4q21.1	0.457327	8.64625e-51	5.9683e-49
GPSM3	6p21.32	0.456796	1.16147e-50	7.98982e-49
ETS1	11q24.3	0.456656	1.25532e-50	8.6058e-49
GZMH	14q12	0.456649	1.26036e-50	8.61086e-49
TNFRSF9	1p36.23	0.4565	1.36857e-50	9.3184e-49
IPCEF1	6q25.2	0.456471	1.39091e-50	9.43838e-49
FPR3	19q13.41	0.456369	1.47199e-50	9.95485e-49
FCN1	9q34.3	0.455892	1.91709e-50	1.29213e-48
CPVL	7p14.3	0.455873	1.93701e-50	1.30118e-48
LRRC25	19p13.11	0.455701	2.13038e-50	1.42628e-48
MILR1	17q23.3	0.455092	2.9836e-50	1.99086e-48
RFTN1	3p24.3	0.454644	3.82032e-50	2.5407e-48
MSC	8q13.3	0.454621	3.86765e-50	2.56366e-48
TFEC	7q31.2	0.454462	4.22322e-50	2.79011e-48
ITGB7	12q13.13	0.454318	4.57085e-50	3.00984e-48
EMP3	19q13.33	0.454206	4.8608e-50	3.19028e-48
TRAF3IP3	1q32.2	0.454084	5.19831e-50	3.40064e-48
CTLA4	2q33.2	0.45407	5.23834e-50	3.41567e-48
NCR3	6p21.33	0.45381	6.04616e-50	3.92961e-48
TLR4	9q33.1	0.453651	6.59464e-50	4.27222e-48
IL7	8q21.13	0.453175	8.56763e-50	5.53248e-48
C1QB	1p36.12	0.452064	1.57412e-49	1.01321e-47
ASGR2	17p13.1	0.451752	1.86636e-49	1.19746e-47
MAP4K1	19q13.2	0.451569	2.06287e-49	1.31931e-47
FAM20A	17q24.2	0.451322	2.35968e-49	1.50433e-47
FYN	6q21	0.450904	2.96287e-49	1.88288e-47
SIGLEC10	19q13.41	0.450481	3.72952e-49	2.36258e-47
TIFAB	5q31.1	0.450282	4.157e-49	2.62507e-47
TNFAIP8L2	1q21.3	0.450171	4.41302e-49	2.77798e-47
CLEC10A	17p13.1	0.449746	5.55991e-49	3.48897e-47
ICAM1	19p13.2	0.449501	6.35048e-49	3.97262e-47
NFAM1	22q13.2	0.449276	7.16984e-49	4.47121e-47
PIK3R6	17p13.1	0.449246	7.28902e-49	4.53142e-47
SOD2	6q25.3	0.449052	8.09716e-49	5.01823e-47
MYO1G	7p13	0.449012	8.27498e-49	5.11261e-47
SYT11	1q22	0.448738	9.59356e-49	5.90904e-47
PPP1R16B	20q11.23	0.448419	1.14006e-48	7.00051e-47
IRF1	5q31.1	0.448294	1.21961e-48	7.46611e-47
MCTP1	5q15	0.448236	1.25792e-48	7.67718e-47
APOBEC3H	22q13.1	0.448227	1.26452e-48	7.69396e-47
NLRC3	16p13.3	0.448026	1.40939e-48	8.54942e-47
FCRL6	1q23.2	0.447462	1.90949e-48	1.15481e-46
IL3RA	Xp22.3 and Yp13.3	0.447445	1.92717e-48	1.16178e-46
CD300C	17q25.1	0.44744	1.93262e-48	1.16178e-46
C1QC	1p36.12	0.447217	2.17856e-48	1.3057e-46
TASL	Xp21.2	0.447202	2.19639e-48	1.31246e-46
LAT	16q13	0.447049	2.38453e-48	1.42064e-46
CXCR5	11q23.3	0.446673	2.91839e-48	1.73354e-46
GIMAP1	7q36.1	0.446618	3.00467e-48	1.77951e-46
NLRC4	2p22.3	0.446504	3.19518e-48	1.88676e-46
BCL2A1	15q25.1	0.446432	3.32157e-48	1.95562e-46
BHLHE22	8q12.3	0.446343	3.48286e-48	2.04457e-46
TRABD2A	2p11.2	0.446329	3.5099e-48	2.05442e-46
CLEC4A	12p13.31	0.446109	3.94915e-48	2.30479e-46
PNOC	8p21.1	0.445865	4.49864e-48	2.61784e-46
TOX2	20q13.12	0.445566	5.28127e-48	3.06436e-46
RGL4	22q11.23	0.445508	5.44695e-48	3.15136e-46
SERPINB9	6p25.2	0.445362	5.89021e-48	3.39799e-46
EMILIN2	18p11.32-p11.31	0.445289	6.12221e-48	3.52168e-46
FOXP3	Xp11.23	0.445116	6.71688e-48	3.85268e-46
IFFO1	12p13.31	0.445094	6.79561e-48	3.8867e-46
TREML2	6p21.1	0.444739	8.2146e-48	4.6849e-46
FCER1G	1q23.3	0.444279	1.04924e-47	5.96695e-46
IGSF6	16p12.2	0.443711	1.41997e-47	8.05239e-46
PIK3CG	7q22.3	0.443417	1.65927e-47	9.38282e-46
TNIP3	4q27	0.443297	1.76845e-47	9.97207e-46
TOX	8q12.1	0.442603	2.55555e-47	1.43699e-45
ARRDC5	19p13.3	0.442583	2.583e-47	1.44836e-45
GFPT2	5q35.3	0.442549	2.63005e-47	1.47063e-45
CEACAM21	19q13.2	0.442382	2.87202e-47	1.60055e-45
GPR65	14q31.3	0.442378	2.87839e-47	1.60055e-45
CYBB	Xp21.1-p11.4	0.442251	3.07928e-47	1.70751e-45
NLRC5	16q13	0.442241	3.09447e-47	1.71119e-45
CLEC2B	12p13.31	0.442236	3.10383e-47	1.71164e-45
LGALS9	17q11.2	0.442227	3.11838e-47	1.71494e-45
PLA1A	3q13.33	0.442133	3.27736e-47	1.79743e-45
TRAF1	9q33.2	0.442112	3.31383e-47	1.81247e-45
RASGRP2	11q13.1	0.442074	3.38147e-47	1.84442e-45
CD1D	1q23.1	0.441647	4.23746e-47	2.30504e-45
IDO1	8p11.21	0.4416	4.34323e-47	2.35617e-45
CD180	5q12.3	0.441332	5.00295e-47	2.70673e-45
RNASE6	14q11.2	0.441309	5.06317e-47	2.73193e-45
EPSTI1	13q14.11	0.441225	5.29239e-47	2.84793e-45
P2RY6	11q13.4	0.441146	5.51759e-47	2.96116e-45
INSL3	19p13.11	0.440931	6.17813e-47	3.30678e-45
SLCO2B1	11q13.4	0.440879	6.34928e-47	3.38933e-45
VAMP5	2p11.2	0.440755	6.78019e-47	3.60973e-45
SIRPB2	20p13	0.440688	7.02311e-47	3.72914e-45
PECAM1	17q23.3	0.440643	7.18965e-47	3.80747e-45
NAPSB	19q13.33	0.439965	1.02708e-46	5.42483e-45
AIM2	1q23.1-q23.2	0.439642	1.21662e-46	6.40903e-45
SIGLEC7	19q13.41	0.439585	1.25341e-46	6.58552e-45
NNMT	11q23.2	0.439376	1.39868e-46	7.32954e-45
GBP1P1	1p22.2	0.438638	2.05775e-46	1.07551e-44
CD72	9p13.3	0.438605	2.09344e-46	1.09131e-44
SCARF1	17p13.3	0.438337	2.4072e-46	1.25162e-44
CSF1R	5q32	0.438279	2.48237e-46	1.28736e-44
HLA-DRB1	6p21.32	0.437949	2.94799e-46	1.52488e-44
DOK3	5q35.3	0.437839	3.12134e-46	1.61038e-44
LTB	6p21.33	0.437702	3.35219e-46	1.72504e-44
TRIM22	11p15.4	0.437679	3.39351e-46	1.74183e-44
PLCL2	3p24.3	0.43756	3.61078e-46	1.84861e-44
ICAM4	19p13.2	0.437099	4.58974e-46	2.34381e-44
STK10	5q35.1	0.436348	6.77935e-46	3.45316e-44
HLA-DQA1	6p21.32	0.436192	7.34748e-46	3.73304e-44
CD200R1	3q13.2	0.436074	7.81307e-46	3.95954e-44
AGAP2	12q14.1	0.435409	1.10237e-45	5.57254e-44
CD33	19q13.41	0.435341	1.14167e-45	5.75665e-44
RCSD1	1q24.2	0.435045	1.33043e-45	6.69161e-44
IL10	1q32.1	0.434488	1.77335e-45	8.89696e-44
APOL3	22q12.3	0.434131	2.13078e-45	1.06635e-43
NCF1C	7q11.23	0.433659	2.71618e-45	1.35592e-43
SLC8A1	2p22.1	0.433331	3.21563e-45	1.60126e-43
ADA2	22q11.1	0.433193	3.45078e-45	1.71409e-43
CD8B	2p11.2	0.43307	3.67573e-45	1.82131e-43
FCRLA	1q23.3	0.432831	4.15458e-45	2.05349e-43
PTAFR	1p35.3	0.432692	4.46161e-45	2.19982e-43
TCL1A	14q32.13	0.432634	4.59656e-45	2.26078e-43
PLAC8	4q21.22	0.432211	5.70737e-45	2.80025e-43
CCL13	17q12	0.431675	7.50649e-45	3.67396e-43
ZBED2	3q13.13	0.431378	8.73424e-45	4.26444e-43
MRC1	10p12.33	0.430931	1.09687e-44	5.34239e-43
FPR1	19q13.41	0.430853	1.14148e-44	5.54613e-43
TGFBR2	3p24.1	0.430815	1.16331e-44	5.63854e-43
LGI2	4p15.2	0.430786	1.18098e-44	5.71036e-43
TYROBP	19q13.12	0.43078	1.18469e-44	5.7145e-43
TMIGD2	19p13.3	0.430755	1.19968e-44	5.7729e-43
FUT7	9q34.3	0.43044	1.4081e-44	6.75955e-43
IFI30	19p13.11	0.430193	1.59668e-44	7.64648e-43
LYN	8q12.1	0.430117	1.65944e-44	7.92807e-43
PLCB2	15q15.1	0.429878	1.87323e-44	8.92815e-43
CTSC	11q14.2	0.429754	1.99477e-44	9.48486e-43
ABCD2	12q12	0.429709	2.04068e-44	9.68017e-43
GPR132	14q32.33	0.429693	2.05723e-44	9.73562e-43
CCR1	3p21.31	0.429468	2.30582e-44	1.08863e-42
CYP1B1	2p22.2	0.429224	2.60919e-44	1.22896e-42
GPR18	13q32.3	0.429051	2.84879e-44	1.33866e-42
PDE6G	17q25.3	0.429011	2.90651e-44	1.36259e-42
XCL1	1q24.2	0.428745	3.3246e-44	1.55495e-42
ENG	9q34.11	0.428576	3.62114e-44	1.6897e-42
TOR4A	9q34.3	0.428067	4.68392e-44	2.18053e-42
C3AR1	12p13.31	0.427251	7.06452e-44	3.28115e-42
IL18R1	2q12.1	0.426951	8.21361e-44	3.80602e-42
KCNJ15	21q22.13-q22.2	0.426757	9.0542e-44	4.18584e-42
P2RY14	3q25.1	0.426724	9.20492e-44	4.24572e-42
CELF2	10p14	0.426544	1.00782e-43	4.63782e-42
SAMHD1	20q11.23	0.426433	1.06519e-43	4.8906e-42
C2	6p21.33	0.426092	1.26412e-43	5.79064e-42
RIPOR2	6p22.3	0.425856	1.42232e-43	6.50045e-42
KLRC1	12p13	0.425623	1.5983e-43	7.2881e-42
CD79B	17q23.3	0.42557	1.6416e-43	7.46856e-42
P2RX1	17p13.2	0.425386	1.79985e-43	8.16992e-42
XIRP1	3p22.2	0.425272	1.9052e-43	8.62858e-42
PPP1R18	6p21.33	0.425051	2.12736e-43	9.613e-42
HVCN1	12q24.11	0.424651	2.59719e-43	1.17096e-41
PIK3AP1	10q24.1	0.424495	2.80818e-43	1.26324e-41
STING1	5q31.2	0.424177	3.28891e-43	1.47617e-41
SOCS1	16p13.13	0.424095	3.42665e-43	1.53456e-41
SLC2A3	12p13.31	0.423798	3.97209e-43	1.77485e-41
NLRP3	1q44	0.423729	4.10981e-43	1.8323e-41
SEPTIN1	16p11.2	0.423616	4.34766e-43	1.93403e-41
CLEC1A	12p13.2	0.423176	5.40915e-43	2.40089e-41
MSN	Xq12	0.422898	6.20999e-43	2.75025e-41
C5AR1	19q13.32	0.422777	6.59256e-43	2.91324e-41
MIR155HG	21q21.3	0.422454	7.73782e-43	3.4118e-41
CASS4	20q13.31	0.42226	8.51696e-43	3.74709e-41
C1ORF54	1q21.2	0.42203	9.54254e-43	4.18909e-41
CCL19	9p13.3	0.421747	1.09742e-42	4.80706e-41
IL4I1	19q13.33	0.421599	1.18044e-42	5.15941e-41
LGALS2	22q13.1	0.421258	1.39674e-42	6.09149e-41
TXK	4p12	0.421205	1.43398e-42	6.24033e-41
CD163	12p13.31	0.421057	1.54207e-42	6.69611e-41
TBXAS1	7q34	0.420833	1.72225e-42	7.46236e-41
P2RY10	Xq21.1	0.42078	1.76752e-42	7.64195e-41
CXCL13	4q21.1	0.420618	1.91403e-42	8.25755e-41
IL15	4q31.21	0.420602	1.92936e-42	8.30578e-41
HEG1	3q21.2	0.420243	2.30152e-42	9.88666e-41
RASSF2	20p13	0.419909	2.71237e-42	1.16266e-40
CD209	19p13.2	0.419827	2.82317e-42	1.20757e-40
A2M	12p13.31	0.419737	2.95074e-42	1.25945e-40
LSP1	11p15.5	0.419552	3.23083e-42	1.37606e-40
MS4A1	11q12.2	0.419416	3.4533e-42	1.46769e-40
XCR1	3p21.31	0.419362	3.54657e-42	1.50414e-40
CD200	3q13.2	0.419205	3.82982e-42	1.62083e-40
SIGLEC5	19q13.41	0.418793	4.68496e-42	1.97855e-40
UBD	6p22.1	0.418504	5.39703e-42	2.27448e-40
TNFSF8	9q32-q33.1	0.418177	6.33013e-42	2.66211e-40
COL15A1	9q22.33	0.418066	6.68171e-42	2.80408e-40
MAL	2q11.1	0.418046	6.74804e-42	2.82599e-40
CCND2	12p13.32	0.417997	6.91016e-42	2.88784e-40
CD19	16p11.2	0.417891	7.27561e-42	3.03423e-40
CARD6	5p13.1	0.417805	7.58724e-42	3.15762e-40
STARD8	Xq13.1	0.417634	8.24901e-42	3.42591e-40
BATF3	1q32.3	0.417552	8.58338e-42	3.5574e-40
CALHM6	6q22.1	0.417521	8.71552e-42	3.60469e-40
CCL4	17q12	0.417314	9.63949e-42	3.97862e-40
RASA3	13q34	0.416853	1.20601e-41	4.96749e-40
DOCK11	Xq24	0.416613	1.35468e-41	5.56054e-40
KIF21B	1q32.1	0.416612	1.35555e-41	5.56054e-40
SLC1A3	5p13.2	0.416487	1.44002e-41	5.89497e-40
VAV1	19p13.3	0.415975	1.84589e-41	7.54103e-40
CCRL2	3p21.31	0.415881	1.93178e-41	7.87584e-40
CD84	1q23.3	0.415598	2.215e-41	9.01219e-40
CARD16	11q22.3	0.415255	2.61444e-41	1.06158e-39
CD300A	17q25.1	0.415015	2.93663e-41	1.18999e-39
CCL22	16q21	0.414695	3.42601e-41	1.38549e-39
IL4R	16p12.1	0.414563	3.65149e-41	1.4737e-39
CPXM2	10q26.13	0.414128	4.50194e-41	1.81328e-39
FCGR2A	1q23.3	0.413698	5.53688e-41	2.22565e-39
ZBP1	20q13.31	0.413203	7.0209e-41	2.81652e-39
CTSL	9q21.33	0.413104	7.36416e-41	2.94831e-39
CXCL11	4q21.1	0.412984	7.79948e-41	3.11637e-39
CD274	9p24.1	0.412809	8.48193e-41	3.3823e-39
GRAP	17p11.2	0.412554	9.58308e-41	3.8138e-39
RAC2	22q13.1	0.412495	9.85991e-41	3.91618e-39
HLA-DQB1	6p21.32	0.41238	1.04141e-40	4.1281e-39
IL12B	5q33.3	0.412228	1.12022e-40	4.43172e-39
CCL23	17q12	0.412122	1.17836e-40	4.65256e-39
NRROS	3q29	0.412044	1.22319e-40	4.82006e-39
RRN3P2	16p11.2	0.412016	1.23951e-40	4.87474e-39
F5	1q24.2	0.411962	1.27196e-40	4.99259e-39
STK17A	7p13	0.411892	1.31535e-40	5.15278e-39
SIGLEC9	19q13.3-q13.4	0.411634	1.48794e-40	5.8175e-39
APOBEC3G	22q13.1	0.411435	1.63625e-40	6.38488e-39
LAT2	7q11.23	0.41132	1.72846e-40	6.73158e-39
DTHD1	4p14	0.411104	1.9152e-40	7.44436e-39
PDE3B	11p15.2	0.411035	1.97942e-40	7.67909e-39
LILRA6	19q13.42	0.410837	2.17553e-40	8.42356e-39
RIN3	14q32.12	0.410545	2.49964e-40	9.6598e-39
VNN1	6q23.2	0.410508	2.54332e-40	9.80579e-39
SIRPB1	20p13	0.410505	2.54721e-40	9.80579e-39
BTN3A3	6p22.2	0.41034	2.75481e-40	1.05846e-38
HLA-DRB6	6p21.32	0.410231	2.90149e-40	1.11268e-38
PTGDS	9q34.3	0.410137	3.0341e-40	1.16131e-38
RASSF4	10q11.21	0.409943	3.32655e-40	1.27082e-38
TSPAN32	11p15.5	0.409854	3.47006e-40	1.32312e-38
TMEM150B	19q13.42	0.409825	3.51814e-40	1.3389e-38
LGMN	14q32.12	0.409652	3.81834e-40	1.45039e-38
MLKL	16q23.1	0.409645	3.83196e-40	1.45281e-38
FMNL3	12q13.12	0.409455	4.1916e-40	1.58615e-38
GNG2	14q22.1	0.409445	4.21285e-40	1.59119e-38
ADGRE2	19p13.12	0.409414	4.27506e-40	1.61164e-38
ITPRIP	10q25.1	0.409004	5.18893e-40	1.95248e-38
KCTD12	13q22.3	0.408287	7.28264e-40	2.73516e-38
ADAM19	5q33.3	0.408191	7.61808e-40	2.85578e-38
PPP2R2B	5q32	0.408036	8.19687e-40	3.06701e-38
CEACAM4	19q13.2	0.407877	8.8344e-40	3.29938e-38
LILRA4	19q13.42	0.407682	9.68545e-40	3.61049e-38
SH2B3	12q24.12	0.40761	1.00176e-39	3.72736e-38
BIRC3	11q22.2	0.407517	1.04685e-39	3.8879e-38
SNAI3	16q24.2	0.407431	1.09004e-39	4.04084e-38
CNR2	1p36.11	0.407355	1.12981e-39	4.18049e-38
TLDC2	20q11.23	0.40734	1.13762e-39	4.20163e-38
CXCL10	4q21.1	0.407039	1.31059e-39	4.83156e-38
S1PR1	1p21.2	0.406848	1.43346e-39	5.27481e-38
HAPLN3	15q26.1	0.406513	1.6772e-39	6.16039e-38
CRISPLD2	16q24.1	0.406453	1.72557e-39	6.32644e-38
STAB1	3p21.1	0.406422	1.75091e-39	6.40763e-38
ZNF80	3q13.31	0.405927	2.20689e-39	8.06161e-38
MGAT1	5q35.3	0.405552	2.63099e-39	9.59328e-38
POU2AF1	11q23.1	0.405517	2.67437e-39	9.73374e-38
ARHGAP31	3q13.32-q13.33	0.40514	3.18918e-39	1.15864e-37
MIAT	22q12.1	0.404599	4.10452e-39	1.48848e-37
B2M	15q21.1	0.404451	4.39756e-39	1.59187e-37
CD79A	19q13.2	0.404126	5.11504e-39	1.84825e-37
ENPP2	8q24.12	0.403894	5.69639e-39	2.0546e-37
STAP1	4q13.2	0.403802	5.94722e-39	2.14121e-37
ACSL4	Xq23	0.40357	6.6214e-39	2.37966e-37
EBI3	19p13.3	0.403171	7.97094e-39	2.85954e-37
AP1S2	Xp22.2	0.403167	7.98552e-39	2.85965e-37
IGFLR1	19q13.12	0.403101	8.2313e-39	2.9424e-37
LY86	6p25.1	0.402457	1.10941e-38	3.95868e-37
CASP4	11q22.3	0.401016	2.15669e-38	7.68197e-37
SIRPA	20p13	0.400383	2.88485e-38	1.02574e-36
MEDAG	13q12.3	0.400169	3.18271e-38	1.12963e-36
SH2D3C	9q34.11	0.399587	4.15661e-38	1.47269e-36
BLK	8p23.1	0.39942	4.48639e-38	1.58673e-36
KBTBD8	3p14.1	0.399283	4.77672e-38	1.68643e-36
PILRA	7q22.1	0.39914	5.10072e-38	1.79764e-36
RARRES1	3q25.32	0.398915	5.65344e-38	1.98894e-36
LAMP3	3q27.1	0.398689	6.26696e-38	2.20091e-36
NCF1B	7q11.23	0.398195	7.85047e-38	2.7522e-36
LAG3	12p13.31	0.397541	1.05773e-37	3.70169e-36
CASP1	11q22.3	0.397492	1.08145e-37	3.77811e-36
HTRA4	8p11.22	0.397074	1.30776e-37	4.56074e-36
CCDC80	3q13.2	0.397062	1.31492e-37	4.57777e-36
ADAP2	17q11.2	0.396765	1.50455e-37	5.22883e-36
CD80	3q13.33	0.396673	1.5684e-37	5.4413e-36
FCRL5	1q23.1	0.396532	1.6721e-37	5.791e-36
PAG1	8q21.13	0.39624	1.90836e-37	6.59784e-36
PSMB9	6p21.32	0.395987	2.13995e-37	7.38579e-36
FCGR2B	1q23.3	0.395466	2.70851e-37	9.332e-36
RUNX3	1p36.11	0.395461	2.71442e-37	9.3363e-36
NOS3	7q36.1	0.394176	4.84398e-37	1.66324e-35
FCGR1A	1q21.2	0.394043	5.14171e-37	1.75975e-35
DEPP1	10q11.21	0.394042	5.14265e-37	1.75975e-35
PCED1B	12q13.11	0.39395	5.36011e-37	1.83103e-35
ICAM2	17q23.3	0.393813	5.6998e-37	1.94376e-35
SLC2A6	9q34.2	0.393649	6.13718e-37	2.08935e-35
OSCAR	19q13.42	0.39352	6.50245e-37	2.20995e-35
CSF2RA	Xp22.32 and Yp11.3	0.39329	7.2079e-37	2.44555e-35
PIP4K2A	10p12.2	0.393212	7.4659e-37	2.5288e-35
CCR8	3p22.1	0.392678	9.4796e-37	3.20545e-35
GLIPR2	9p13.3	0.392584	9.89022e-37	3.33866e-35
SLC22A3	6q25.3	0.392501	1.02619e-36	3.45829e-35
ADA	20q13.12	0.392147	1.20204e-36	4.0441e-35
ADAMDEC1	8p21.2	0.392139	1.20628e-36	4.05156e-35
SLC24A4	14q32.12	0.392095	1.23017e-36	4.12488e-35
IRAK2	3p25.3	0.39201	1.27778e-36	4.27734e-35
BCL11B	14q32.2	0.391768	1.42331e-36	4.75656e-35
LILRB5	19q13.4	0.391746	1.43772e-36	4.79672e-35
GYPC	2q14.3	0.391506	1.59951e-36	5.32763e-35
SYNPO	5q33.1	0.391097	1.9191e-36	6.3815e-35
LRRC8C	1p22.2	0.390838	2.15339e-36	7.14869e-35
ITPRIPL1	2q11.2	0.390582	2.41308e-36	7.99753e-35
ALOX5AP	13q12.3	0.390483	2.52103e-36	8.34148e-35
PALM2AKAP2	9q31.3	0.390325	2.7041e-36	8.93247e-35
IFNG	12q15	0.38991	3.25081e-36	1.07207e-34
FLVCR2	14q24.3	0.389885	3.28644e-36	1.08204e-34
RSPO3	6q22.33	0.389683	3.59515e-36	1.18174e-34
FPR2	19q13.41	0.389112	4.62768e-36	1.51864e-34
SEMA7A	15q24.1	0.38906	4.73567e-36	1.55153e-34
MAFB	20q12	0.388796	5.31945e-36	1.73995e-34
CLEC7A	12p13.2	0.388786	5.34396e-36	1.74511e-34
PTGDR	14q22.1	0.388769	5.38277e-36	1.75492e-34
TNFRSF13B	17p11.2	0.388171	7.00696e-36	2.27726e-34
SPIB	19q13.33	0.388171	7.00765e-36	2.27726e-34
SERPINF1	17p13.3	0.388086	7.2755e-36	2.36047e-34
PAPLN	14q24.2	0.387957	7.7015e-36	2.49464e-34
RHOF	12q24.31	0.387883	7.95618e-36	2.57297e-34
TTC24	1q22	0.387768	8.36839e-36	2.70027e-34
LRRC2	3p21.31	0.387766	8.3768e-36	2.70027e-34
DYSF	2p13.2	0.387441	9.66036e-36	3.10902e-34
FCRL1	1q23.1	0.387156	1.09488e-35	3.51802e-34
TMEM176B	7q36.1	0.386946	1.20072e-35	3.85193e-34
FCRL2	1q23.1	0.386795	1.28279e-35	4.10863e-34
TLR9	3p21.2	0.38638	1.53807e-35	4.91838e-34
CLEC4E	12p13.31	0.386306	1.589e-35	5.07314e-34
STK17B	2q32.3	0.386192	1.67002e-35	5.32332e-34
APOL2	22q12.3	0.386067	1.76434e-35	5.61502e-34
GJA5	1q21.2	0.385933	1.87049e-35	5.9434e-34
IKZF3	17q12-q21.1	0.385701	2.06971e-35	6.56599e-34
SELE	1q24.2	0.38556	2.20166e-35	6.97356e-34
TCN2	22q12.2	0.385457	2.30229e-35	7.28077e-34
FGF7	15q21.2	0.385284	2.48359e-35	7.84173e-34
RTP5	2q37.3	0.385277	2.49082e-35	7.85215e-34
TMSB4XP8	4q22.1	0.385027	2.77756e-35	8.74232e-34
CCL11	17q12	0.384844	3.00789e-35	9.45243e-34
SELP	1q24.2	0.384836	3.01869e-35	9.47151e-34
AXL	19q13.2	0.384498	3.49579e-35	1.09513e-33
BST1	4p15.32	0.384465	3.54675e-35	1.10936e-33
HK3	5q35.2	0.384459	3.55619e-35	1.11058e-33
CAMK4	5q22.1	0.384315	3.78651e-35	1.18066e-33
TMEM119	12q23.3	0.384277	3.84944e-35	1.19841e-33
EPHB2	1p36.12	0.384183	4.01012e-35	1.2465e-33
GLIPR1	12q21.2	0.384133	4.09692e-35	1.27151e-33
BMS1P20	22q11.22	0.383936	4.46236e-35	1.38278e-33
RUBCNL	13q14.13	0.38389	4.55232e-35	1.40847e-33
FCGR1B	1p11.2	0.383529	5.32552e-35	1.64516e-33
MOXD1	6q23.2	0.383422	5.57825e-35	1.72058e-33
DSE	6q22.1	0.383395	5.64259e-35	1.73774e-33
GRAMD1B	11q24.1	0.383056	6.53474e-35	2.00941e-33
RGL1	1q25.3	0.383042	6.57402e-35	2.01838e-33
LBP	20q11.23	0.382815	7.25297e-35	2.22343e-33
WNT10A	2q35	0.382791	7.32906e-35	2.24332e-33
FCER2	19p13.2	0.38267	7.72255e-35	2.36015e-33
IDO2	8p11.21	0.382375	8.76962e-35	2.67607e-33
ADAMTSL1	9p22.2-p22.1	0.382175	9.5623e-35	2.91352e-33
HLA-DOB	6p21.32	0.381831	1.10891e-34	3.37357e-33
CFLAR	2q33.1	0.381796	1.1257e-34	3.41946e-33
PLTP	20q13.12	0.38174	1.15344e-34	3.49842e-33
ALDH1A1	9q21.13	0.381636	1.20611e-34	3.65262e-33
NT5E	6q14.3	0.381553	1.25021e-34	3.78046e-33
LIX1L	1q21.1	0.381489	1.28468e-34	3.87884e-33
KCNN3	1q21.3	0.381389	1.34155e-34	4.04444e-33
SH2D2A	1q23.1	0.381378	1.34806e-34	4.05798e-33
ADAM6	14q32.33	0.381129	1.50002e-34	4.50862e-33
PRAM1	19p13.2	0.38091	1.6481e-34	4.94626e-33
APOL6	22q12.3	0.380699	1.80416e-34	5.40654e-33
WARS1	14q32.2	0.380362	2.08489e-34	6.23845e-33
FAS	10q23.31	0.380211	2.22392e-34	6.64456e-33
C5ORF58	5q35.1	0.380088	2.34504e-34	6.99216e-33
LYL1	19p13.13	0.380085	2.34725e-34	6.99216e-33
TBC1D2B	15q24.3-q25.1	0.379887	2.5557e-34	7.60177e-33
FCGR2C	1q23.3	0.378915	3.87113e-34	1.14974e-32
TLR2	4q31.3	0.378682	4.27504e-34	1.26782e-32
COL4A4	2q36.3	0.378642	4.3481e-34	1.28758e-32
ITGA4	2q31.3	0.3783	5.02886e-34	1.48697e-32
UBASH3B	11q24.1	0.378245	5.14779e-34	1.51989e-32
ITM2A	Xq21.1	0.377995	5.72628e-34	1.6882e-32
FLT3LG	19q13.33	0.377957	5.8193e-34	1.7131e-32
ADGRG5	16q21	0.377846	6.10185e-34	1.79364e-32
GPBAR1	2q35	0.377499	7.06894e-34	2.07487e-32
FOLR2	11q13.4	0.377482	7.12102e-34	2.0871e-32
SIGLEC1	20p13	0.377183	8.0843e-34	2.36596e-32
WNT2	7q31.2	0.376945	8.93866e-34	2.61218e-32
DENND3	8q24.3	0.376922	9.02742e-34	2.63427e-32
ST3GAL2	16q22.1	0.376646	1.01462e-33	2.95644e-32
PTGIS	20q13.13	0.376473	1.09186e-33	3.17688e-32
SLC2A14	12p13.31	0.376211	1.21975e-33	3.54383e-32
DRAM1	12q23.2	0.376172	1.23998e-33	3.59739e-32
MPP1	Xq28	0.376043	1.30903e-33	3.79222e-32
ABCB1	7q21.12	0.37601	1.32779e-33	3.84101e-32
PLCG2	16q24.1	0.375927	1.37515e-33	3.97225e-32
ANXA1	9q21.13	0.375919	1.37949e-33	3.97906e-32
KIR3DL1	19q13.42	0.375775	1.46591e-33	4.22225e-32
FCGR3A	1q23.3	0.375743	1.4861e-33	4.27425e-32
GALNT12	9q22.33	0.375649	1.54587e-33	4.43978e-32
HLA-DQA2	6p21.32	0.375199	1.86891e-33	5.35985e-32
IL9R	Xq28 and Yq12	0.375161	1.89864e-33	5.43733e-32
PEAK3	19p13.3	0.374731	2.27524e-33	6.50654e-32
BTN3A2	6p22.2	0.374703	2.30252e-33	6.57517e-32
CD93	20p11.21	0.374676	2.32876e-33	6.64062e-32
DHRS9	2q31.1	0.374494	2.5138e-33	7.15807e-32
LBH	2p23.1	0.374458	2.55207e-33	7.25672e-32
ABI3BP	3q12.2	0.374427	2.58548e-33	7.34129e-32
WNT1	12q13.12	0.374357	2.66245e-33	7.54913e-32
KLRG1	12p13.31	0.374047	3.03189e-33	8.58448e-32
CLECL1	12p13.31	0.373758	3.42286e-33	9.67781e-32
RASGRP3	2p22.3	0.373145	4.42317e-33	1.24884e-31
HSD17B11	4q22.1	0.372855	4.99212e-33	1.4075e-31
GPR25	1q32.1	0.37285	5.00275e-33	1.40851e-31
SGK1	6q23.2	0.372693	5.34105e-33	1.50164e-31
BEND4	4p13	0.372153	6.68929e-33	1.87807e-31
CRYBG3	3q11.2	0.371867	7.5347e-33	2.11246e-31
RAB8B	15q22.2	0.371723	8.00171e-33	2.24025e-31
AOX1	2q33.1	0.371314	9.48205e-33	2.651e-31
IL6	7p15.3	0.371209	9.90658e-33	2.76583e-31
PLEKHO1	1q21.2	0.370877	1.13707e-32	3.17017e-31
CLEC4C	12p13.31	0.370784	1.18174e-32	3.29014e-31
CH25H	10q23.31	0.370657	1.24568e-32	3.46333e-31
SH3TC1	4p16.1	0.370637	1.2556e-32	3.48608e-31
NAALADL1	11q13.1	0.370601	1.27486e-32	3.53464e-31
MARCHF1	4q32.2-q32.3	0.370527	1.31463e-32	3.63988e-31
APOL4	22q12.3	0.370252	1.47264e-32	4.07172e-31
KIR3DL2	19q13.42	0.37023	1.48654e-32	4.10448e-31
LCP1	13q14.13	0.369744	1.81718e-32	5.01052e-31
SLCO5A1	8q13.3	0.369446	2.05461e-32	5.65737e-31
TGFB1	19q13.2	0.369105	2.36474e-32	6.50238e-31
FXYD2	11q23.3	0.368963	2.50782e-32	6.88636e-31
CXCL12	10q11.21	0.368492	3.04345e-32	8.34574e-31
TNFRSF17	16p13.13	0.368234	3.38417e-32	9.26736e-31
CLNK	4p16.1	0.368205	3.4252e-32	9.36691e-31
ADPRH	3q13.33	0.368156	3.49382e-32	9.54151e-31
CDHR1	10q23.1	0.367978	3.75957e-32	1.02533e-30
TLR10	4p14	0.367939	3.82014e-32	1.04043e-30
BTN3A1	6p22.2	0.367758	4.11345e-32	1.11879e-30
GGT5	22q11.23	0.367721	4.17657e-32	1.13442e-30
CR1L	1q32.2	0.367658	4.2865e-32	1.1627e-30
FAM30A	14q32.33	0.367486	4.60027e-32	1.24612e-30
ITGAM	16p11.2	0.367365	4.83385e-32	1.30762e-30
COTL1	16q24.1	0.367129	5.32266e-32	1.43791e-30
MAF	16q23.2	0.367007	5.59562e-32	1.50961e-30
TNFRSF4	1p36.33	0.366892	5.86618e-32	1.58047e-30
HLA-F	6p22.1	0.366733	6.25916e-32	1.68408e-30
SIGLEC14	19q13.41	0.366725	6.27918e-32	1.6872e-30
DAB2	5p13.1	0.366402	7.16494e-32	1.92262e-30
PLCXD2	3q13.2	0.366378	7.23626e-32	1.93916e-30
NABP1	2q32.3	0.366311	7.43764e-32	1.99046e-30
MEFV	16p13.3	0.36616	7.90704e-32	2.11326e-30
KLRC3	12p13.2	0.366008	8.41271e-32	2.24541e-30
PTCRA	6p21.1	0.365913	8.74465e-32	2.3309e-30
SLC12A3	16q13	0.365843	8.99967e-32	2.39379e-30
TARP	7p14.1	0.365842	9.00451e-32	2.39379e-30
XPNPEP2	Xq26.1	0.365795	9.17609e-32	2.43617e-30
FOXO1	13q14.11	0.365743	9.372e-32	2.48488e-30
NCR1	19q13.42	0.36556	1.00974e-31	2.67368e-30
PVRIG	7q22.1	0.365483	1.04192e-31	2.75524e-30
CPNE8	12q12	0.364951	1.29322e-31	3.41525e-30
PAX5	9p13.2	0.364363	1.64181e-31	4.32826e-30
DNAJC5B	8q13.1	0.364361	1.64326e-31	4.32826e-30
GLT1D1	12q24.33	0.364258	1.71289e-31	4.50572e-30
ABCA6	17q24.2-q24.3	0.364221	1.73912e-31	4.56872e-30
CYSLTR2	13q14.2	0.364078	1.84243e-31	4.83379e-30
PATL2	15q21.1	0.363306	2.51777e-31	6.59696e-30
CD1C	1q23.1	0.363178	2.65085e-31	6.93656e-30
TAP2	6p21.32	0.363163	2.6676e-31	6.97128e-30
LAP3	4p15.32	0.363008	2.83963e-31	7.41118e-30
CD300LB	17q25.1	0.362559	3.40292e-31	8.86974e-30
NTNG2	9q34.13	0.362392	3.6395e-31	9.47406e-30
IL1R1	2q11.2-q12.1	0.362363	3.68114e-31	9.57001e-30
ANTXR2	4q21.21	0.361883	4.4657e-31	1.15946e-29
TEX11	Xp11	0.361792	4.63095e-31	1.20081e-29
MMP3	11q22.2	0.361742	4.72568e-31	1.22379e-29
ITGAD	16p11.2	0.361416	5.38626e-31	1.39305e-29
TNS1	2q35	0.36138	5.46391e-31	1.41131e-29
PML	15q24.1	0.361217	5.8318e-31	1.50439e-29
PDE1B	12q13.2	0.361025	6.29939e-31	1.62292e-29
CLIC5	6p21.1	0.360995	6.37414e-31	1.64007e-29
APOBEC3C	22q13.1	0.360747	7.03973e-31	1.809e-29
SOCS3	17q25.3	0.360529	7.68085e-31	1.97122e-29
VWF	12p13.31	0.360236	8.63523e-31	2.21332e-29
IGFBP7	4q12	0.360109	9.08317e-31	2.32515e-29
ERG	21q22.2	0.359995	9.50561e-31	2.43018e-29
TLR7	Xp22.2	0.359487	1.16414e-30	2.97243e-29
SPTA1	1q23.1	0.359264	1.27228e-30	3.24439e-29
CCL8	17q12	0.35903	1.3962e-30	3.55587e-29
CD101	1p13.1	0.358856	1.49632e-30	3.806e-29
SAMD9L	7q21.2	0.35872	1.57939e-30	4.0122e-29
SNCAIP	5q23.2	0.358703	1.59001e-30	4.03408e-29
TFPI	2q32.1	0.358537	1.69824e-30	4.30322e-29
CYRIA	2p24.2	0.35851	1.71668e-30	4.34444e-29
NR4A3	9q22	0.358504	1.72064e-30	4.34896e-29
CFP	Xp11.23	0.358419	1.77948e-30	4.492e-29
NPC2	14q24.3	0.358289	1.87417e-30	4.72507e-29
CLEC4D	12p13.31	0.358221	1.92537e-30	4.84805e-29
JCHAIN	4q13.3	0.357992	2.10809e-30	5.30147e-29
GPR141	7p14.1	0.357812	2.26337e-30	5.68483e-29
STRA6	15q24.1	0.35777	2.30168e-30	5.77381e-29
GPR55	2q37.1	0.357715	2.35282e-30	5.89471e-29
CTSB	8p23.1	0.357662	2.4019e-30	6.01017e-29
TIE1	1p34.2	0.357452	2.61016e-30	6.52311e-29
ADGRE1	19p13.3-p13.2	0.357437	2.62626e-30	6.55518e-29
NCOA7	6q22.31-q22.32	0.35725	2.82711e-30	7.0477e-29
PLPP3	1p32.2	0.357115	2.9822e-30	7.42507e-29
CP	3q24-q25.1	0.356755	3.43738e-30	8.54775e-29
TMEM200A	6q23.1	0.356664	3.56253e-30	8.84799e-29
LHFPL2	5q14.1	0.356533	3.75124e-30	9.30513e-29
CCL17	16q21	0.356194	4.28685e-30	1.06206e-28
SLC25A53	Xq22.2	0.355957	4.70667e-30	1.16462e-28
TLN1	9p13.3	0.355943	4.73224e-30	1.16951e-28
ARPC1B	7q22.1	0.355477	5.68324e-30	1.4028e-28
NRP1	10p11.22	0.355253	6.20604e-30	1.52996e-28
MRGPRF	11q13.3	0.355248	6.21852e-30	1.53115e-28
PTPRO	12p12.3	0.355139	6.48976e-30	1.59597e-28
ANK2	4q25-q26	0.35509	6.61538e-30	1.62487e-28
SLC2A5	1p36.23	0.354997	6.86149e-30	1.68325e-28
FCGR1CP	1q21.1	0.35492	7.07018e-30	1.73232e-28
TMEM176A	7q36.1	0.354271	9.11626e-30	2.23092e-28
ITGA5	12q13.13	0.354211	9.33214e-30	2.28096e-28
PRR5L	11p13-p12	0.354061	9.89662e-30	2.41598e-28
ADCY7	16q12.1	0.353942	1.03665e-29	2.5276e-28
LAIR2	19q13.42	0.353756	1.1144e-29	2.71387e-28
CCDC141	2q31.2	0.353667	1.15407e-29	2.80708e-28
IFNAR2	21q22.11	0.353652	1.16057e-29	2.81944e-28
NRXN2	11q13.1	0.353304	1.32912e-29	3.22502e-28
DPT	1q24.2	0.353211	1.37839e-29	3.3405e-28
ADAM28	8p21.2	0.353027	1.48075e-29	3.58423e-28
KIR2DL4	19q13.42	0.352894	1.55908e-29	3.76929e-28
CADM3	1q23.2	0.352869	1.57456e-29	3.80211e-28
CD70	19p13.3	0.35285	1.58638e-29	3.82604e-28
EMILIN1	2p23.3	0.352831	1.59831e-29	3.85017e-28
PLA2G7	6p12.3	0.35275	1.64941e-29	3.96849e-28
ETS2	21q22.2	0.35274	1.65541e-29	3.97815e-28
ID3	1p36.12	0.352689	1.68907e-29	4.05417e-28
CD83	6p23	0.352663	1.70575e-29	4.0893e-28
CNRIP1	2p14	0.352501	1.81658e-29	4.34979e-28
ARHGAP26	5q31.3	0.352401	1.88884e-29	4.51742e-28
INMT	7p14.3	0.352325	1.94512e-29	4.64647e-28
CTSZ	20q13.32	0.352161	2.07305e-29	4.94617e-28
NEXN	1p31.1	0.352106	2.11794e-29	5.04726e-28
CCDC88B	11q13.1	0.351888	2.30414e-29	5.48446e-28
ZNF804A	2q32.1	0.351721	2.45821e-29	5.84423e-28
IL33	9p24.1	0.351549	2.62756e-29	6.23944e-28
PTGER2	14q22.1	0.351508	2.66945e-29	6.3314e-28
IL1R2	2q11.2	0.351505	2.67329e-29	6.33301e-28
DOCK10	2q36.2	0.351437	2.74439e-29	6.49375e-28
GPNMB	7p15.3	0.351403	2.7811e-29	6.57284e-28
CPNE5	6p21.2	0.35138	2.805e-29	6.62152e-28
TFE3	Xp11.23	0.351345	2.84387e-29	6.70536e-28
FTL	19q13.33	0.351342	2.84724e-29	6.70542e-28
GPA33	1q24.1	0.351191	3.01808e-29	7.0994e-28
ADAMTSL4	1q21.2	0.350721	3.61888e-29	8.50267e-28
PDGFRA	4q12	0.350646	3.72458e-29	8.74077e-28
MATK	19p13.3	0.350459	4.00341e-29	9.38412e-28
SFRP4	7p14.1	0.349978	4.81798e-29	1.12803e-27
CD1B	1q23.1	0.349646	5.47499e-29	1.28035e-27
S100A9	1q21.3	0.349613	5.54427e-29	1.29504e-27
DPEP1	16q24.3	0.349599	5.57523e-29	1.30076e-27
ZYX	7q34	0.349477	5.84209e-29	1.36143e-27
MMRN2	10q23.2	0.349426	5.95792e-29	1.38681e-27
S100A3	1q21.3	0.348846	7.44245e-29	1.73035e-27
HLX	1q41	0.348836	7.47322e-29	1.73549e-27
VSIG4	Xq12	0.348644	8.04394e-29	1.86586e-27
FLNA	Xq28	0.348454	8.65037e-29	2.0042e-27
CD14	5q31.3	0.347881	1.07662e-28	2.49154e-27
MYO1E	15q22.2	0.34763	1.18502e-28	2.73924e-27
CCL21	9p13.3	0.347567	1.21391e-28	2.80278e-27
BMP6	6p24.3	0.347556	1.21899e-28	2.81125e-27
NIBAN3	19p13.11	0.347492	1.24906e-28	2.87729e-27
RASGRP4	19q13.2	0.347404	1.29191e-28	2.97259e-27
FFAR3	19q13.12	0.34727	1.35937e-28	3.12421e-27
ARHGAP45	19p13.3	0.347069	1.46762e-28	3.36913e-27
KLRF1	12p13.31	0.346943	1.53971e-28	3.53058e-27
KYNU	2q22.2	0.34669	1.69526e-28	3.8828e-27
KIF19	17q25.1	0.346643	1.72622e-28	3.9492e-27
GPR84	12q13.13	0.34629	1.97363e-28	4.51007e-27
SUCNR1	3q25.1	0.346268	1.9905e-28	4.54342e-27
SHE	1q21.3	0.346124	2.10209e-28	4.79268e-27
CHST2	3q24	0.346013	2.19249e-28	4.99308e-27
STAMBPL1	10q23.31	0.345896	2.29225e-28	5.21434e-27
JAM2	21q21.3	0.345672	2.49511e-28	5.66936e-27
TSHZ2	20q13.2	0.345504	2.65913e-28	6.0352e-27
PLK3	1p34.1	0.345324	2.84663e-28	6.45344e-27
KLRC2	12p13.2	0.344499	3.88847e-28	8.80537e-27
RAPGEF1	9q34.13	0.344149	4.43717e-28	1.00365e-26
OLFML1	11p15.4	0.344106	4.50865e-28	1.01867e-26
PLA2G4A	1q31.1	0.343956	4.77133e-28	1.0768e-26
GGTA1	9q33.2	0.343908	4.85801e-28	1.09513e-26
LTBP2	14q24.3	0.343819	5.02336e-28	1.13113e-26
TMEM37	2q14.2	0.343758	5.14137e-28	1.1564e-26
DNASE1L3	3p14.3	0.343673	5.30857e-28	1.19267e-26
ICAM3	19p13.2	0.343642	5.37115e-28	1.20538e-26
TAP1	6p21.32	0.343633	5.3883e-28	1.20787e-26
SYNE1	6q25.2	0.343523	5.61605e-28	1.25752e-26
KCNJ10	1q23.2	0.343276	6.1628e-28	1.3784e-26
ARL4C	2q37.1	0.343226	6.2796e-28	1.40296e-26
ADAMTS4	1q23.3	0.343201	6.33712e-28	1.41423e-26
CHI3L1	1q32.1	0.343077	6.64075e-28	1.48034e-26
LIMD2	17q23.3	0.342958	6.94421e-28	1.54626e-26
RENBP	Xq28	0.342903	7.08911e-28	1.57678e-26
CDH5	16q21	0.342791	7.39374e-28	1.64271e-26
HLA-B	6p21.33	0.3425	8.24382e-28	1.82954e-26
RARRES2	7q36.1	0.342489	8.27773e-28	1.83503e-26
GPR4	19q13.32	0.34238	8.62306e-28	1.90947e-26
ARSB	5q14.1	0.342304	8.87159e-28	1.96086e-26
ADGRD1	12q24.33	0.342303	8.87473e-28	1.96086e-26
TTYH3	7p22.3	0.342109	9.54259e-28	2.1061e-26
ACKR1	1q23.2	0.342097	9.58592e-28	2.11334e-26
FUT4	11q21	0.341966	1.00666e-27	2.21687e-26
ENTHD1	22q13.1	0.341678	1.12121e-27	2.46642e-26
GBP6	1p22.2	0.341537	1.18193e-27	2.59712e-26
ALOX5	10q11.21	0.341426	1.23196e-27	2.70411e-26
SH3KBP1	Xp22.12	0.341114	1.38395e-27	3.03439e-26
SLFN5	17q12	0.341067	1.40845e-27	3.08473e-26
STARD4	5q22.1	0.340944	1.47402e-27	3.22481e-26
AKR1B1	7q33	0.340862	1.51982e-27	3.32137e-26
MX2	21q22.3	0.34067	1.63265e-27	3.56406e-26
CPED1	7q31.31	0.340556	1.70358e-27	3.71484e-26
LILRA3	19q13.4 alternate reference locus	0.339825	2.23484e-27	4.86801e-26
UNC13D	17q25.3	0.339662	2.37427e-27	5.1661e-26
GTSF1L	20q13.12	0.339622	2.40953e-27	5.23713e-26
IL18	11q23.1	0.339499	2.5214e-27	5.47434e-26
ACOT9	Xp22.11	0.339225	2.79088e-27	6.05284e-26
PIM2	Xp11.23	0.339123	2.89795e-27	6.27825e-26
CCDC3	10p13	0.338707	3.37977e-27	7.31418e-26
HSPG2	1p36.12	0.338576	3.54839e-27	7.67081e-26
LIPC	15q21.3	0.338547	3.58553e-27	7.74273e-26
A4GALT	22q13.2	0.33827	3.97215e-27	8.56836e-26
NPL	1q25.3	0.338097	4.23359e-27	9.1225e-26
PDPN	1p36.21	0.337868	4.6061e-27	9.9145e-26
ZNF366	5q13.1	0.337861	4.61775e-27	9.9289e-26
ACTB	7p22.1	0.337575	5.13139e-27	1.10215e-25
TOGARAM2	2p23.2	0.337564	5.15274e-27	1.10555e-25
CSGALNACT1	8p21.3	0.337376	5.52099e-27	1.18329e-25
FMO3	1q24.3	0.337359	5.55459e-27	1.18922e-25
CREB3L3	19p13.3	0.337258	5.76599e-27	1.23316e-25
POU3F1	1p34.3	0.337238	5.8078e-27	1.24063e-25
GBGT1	9q34.2	0.337235	5.81334e-27	1.24063e-25
ADGRA2	8p11.23	0.337067	6.18503e-27	1.31855e-25
UPP1	7p12.3	0.336897	6.58293e-27	1.40188e-25
S100A4	1q21.3	0.336885	6.61137e-27	1.40644e-25
HLA-DRB5	6p21.32	0.336834	6.73746e-27	1.43175e-25
FILIP1L	3q12.1	0.336639	7.23614e-27	1.53609e-25
FAM124B	2q36.2	0.336336	8.0866e-27	1.7148e-25
NECAP2	1p36.13	0.336059	8.94858e-27	1.89558e-25
TNFSF11	13q14	0.336055	8.96055e-27	1.89611e-25
PLEKHF1	19q12	0.335985	9.19328e-27	1.94331e-25
ADGRL4	1p31.1	0.335767	9.95556e-27	2.10098e-25
SULF1	8q13.2-q13.3	0.335766	9.9602e-27	2.10098e-25
GAS7	17p13.1	0.335421	1.12968e-26	2.38041e-25
AOC3	17q21.31	0.335337	1.1649e-26	2.45204e-25
VPREB3	22q11.23	0.335244	1.20519e-26	2.53419e-25
CCL18	17q12	0.335188	1.23023e-26	2.58412e-25
PTPRE	10q26.2	0.33504	1.29801e-26	2.72364e-25
HS3ST3B1	17p12	0.334936	1.34857e-26	2.82678e-25
IL6R	1q21.3	0.334674	1.48315e-26	3.10562e-25
CLEC12B	12p13.2	0.334632	1.50615e-26	3.15049e-25
CEP112	17q24.1	0.334595	1.52653e-26	3.18978e-25
SPNS2	17p13.2	0.334463	1.60192e-26	3.34382e-25
LRP1	12q13.3	0.334416	1.62951e-26	3.39787e-25
GRIP2	3p25.1	0.334324	1.68467e-26	3.50922e-25
GIMAP2	7q36.1	0.334043	1.86582e-26	3.88254e-25
ARHGAP4	Xq28	0.333741	2.08231e-26	4.32852e-25
OSM	22q12.2	0.333732	2.08851e-26	4.33691e-25
TSPAN11	12p11.21	0.333705	2.10932e-26	4.37559e-25
FREM1	9p22.3	0.333548	2.23292e-26	4.62718e-25
DGKG	3q27.2-q27.3	0.33353	2.24783e-26	4.65326e-25
S100A8	1q21.3	0.333135	2.59345e-26	5.3632e-25
GYPE	4q31.21	0.333037	2.68677e-26	5.54611e-25
HGF	7q21.11	0.333036	2.68745e-26	5.54611e-25
TLL1	4q32.3	0.333021	2.70264e-26	5.57173e-25
DAZL	3p24.3	0.332897	2.82614e-26	5.82033e-25
VGLL3	3p12.1	0.332834	2.89119e-26	5.94818e-25
NFKBIE	6p21.1	0.33283	2.8957e-26	5.95135e-25
ADTRP	6p24.1	0.332567	3.185e-26	6.53921e-25
P2RY13	3q25.1	0.332532	3.22455e-26	6.61363e-25
GPR31	6q27	0.33252	3.23945e-26	6.63739e-25
IGF1	12q23.2	0.332465	3.30348e-26	6.76167e-25
CD1E	1q23.1	0.332453	3.31865e-26	6.78576e-25
PLEKHA2	8p11.22	0.332315	3.48776e-26	7.12428e-25
NKAPL	6p22.1	0.332175	3.66791e-26	7.48464e-25
LIMK1	7q11.23	0.332116	3.74704e-26	7.63831e-25
ANGPTL1	1q25.2	0.332099	3.76968e-26	7.67665e-25
ENTPD1	10q24.1	0.331949	3.97908e-26	8.09485e-25
SOD3	4p15.2	0.331908	4.03864e-26	8.20767e-25
CPZ	4p16.1	0.331875	4.08799e-26	8.29953e-25
GPR85	7q31.1	0.331707	4.34155e-26	8.80539e-25
KCNH4	17q21.2	0.33159	4.52911e-26	9.17649e-25
C19ORF38	19p13.2	0.331464	4.73913e-26	9.59231e-25
PIM1	6p21.2	0.330986	5.62753e-26	1.1379e-24
LMO2	11p13	0.330793	6.03179e-26	1.21841e-24
KIR2DL3	19q13.42	0.330738	6.15084e-26	1.2412e-24
SEL1L3	4p15.2	0.330377	7.00043e-26	1.41122e-24
TPK1	7q35	0.330307	7.17898e-26	1.44576e-24
OLR1	12p13.2	0.330283	7.24134e-26	1.45686e-24
APOE	19q13.32	0.33017	7.5389e-26	1.5152e-24
SLC31A2	9q32	0.33008	7.78553e-26	1.5632e-24
NMI	2q23.3	0.329986	8.05253e-26	1.61519e-24
APLNR	11q12.1	0.329964	8.11657e-26	1.6264e-24
DIPK2B	Xp11.3	0.329926	8.22634e-26	1.64675e-24
CCR6	6q27	0.329896	8.31726e-26	1.66329e-24
PLEKHG1	6q25.1	0.329496	9.59471e-26	1.91683e-24
DCSTAMP	8q22.3	0.329343	1.01314e-25	2.02204e-24
HLA-DQB2	6p21.32	0.329301	1.02853e-25	2.05072e-24
MMP19	12q13.2	0.329274	1.03843e-25	2.06838e-24
PALMD	1p21.2	0.329244	1.04969e-25	2.08874e-24
SLFN14	17q12	0.329167	1.07876e-25	2.14446e-24
ARHGEF15	17p13.1	0.329094	1.10732e-25	2.19905e-24
TCF7	5q31.1	0.329044	1.12743e-25	2.23677e-24
TMEM52B	12p13.2	0.328873	1.19816e-25	2.37474e-24
ADGRG3	16q21	0.328722	1.26427e-25	2.50327e-24
KIFC3	16q21	0.328709	1.27006e-25	2.51226e-24
ZBTB32	19q13.12	0.328632	1.30564e-25	2.58009e-24
SSTR3	22q13.1	0.328416	1.4096e-25	2.78278e-24
ADAM23	2q33.3	0.328169	1.53937e-25	3.03597e-24
CASP5	11q22.3	0.327969	1.65276e-25	3.25639e-24
LIPG	18q21.1	0.327657	1.84601e-25	3.63356e-24
ADAMTS9	3p14.1	0.327553	1.91501e-25	3.76568e-24
ST6GAL1	3q27.3	0.327228	2.14914e-25	4.22194e-24
RELB	19q13.32	0.327004	2.3267e-25	4.56626e-24
PIK3CD-AS1	1p36.22	0.326804	2.49714e-25	4.89596e-24
EGFL6	Xp22.2	0.326781	2.51705e-25	4.93017e-24
TEK	9p21.2	0.32677	2.52734e-25	4.9448e-24
APOC1	19q13.32	0.326767	2.52946e-25	4.9448e-24
FUOM	10q26.3	0.326679	2.60976e-25	5.09679e-24
FOXF1	16q24.1	0.326648	2.63848e-25	5.14787e-24
MAN2B1	19p13.13	0.3265	2.78025e-25	5.41918e-24
CLEC9A	12p13.2	0.326203	3.08668e-25	6.01062e-24
SERPINE2	2q36.1	0.326106	3.19418e-25	6.21391e-24
TVP23A	16p13.13	0.326071	3.23441e-25	6.28607e-24
KLHL29	2p24.1	0.325661	3.73623e-25	7.25431e-24
CHST7	Xp11.3	0.325548	3.88837e-25	7.54238e-24
GTSF1	12q13.13	0.325384	4.11901e-25	7.98203e-24
ECSCR	5q31.2	0.325309	4.22865e-25	8.18657e-24
CD248	11q13.2	0.325267	4.29237e-25	8.30191e-24
HRH1	3p25.3	0.325212	4.37661e-25	8.45666e-24
TTC7A	2p21	0.324955	4.78993e-25	9.24637e-24
DENND1C	19p13.3	0.324896	4.88964e-25	9.42975e-24
ARHGAP23	17q12	0.324511	5.59738e-25	1.07842e-23
TACC1	8p11.22	0.32439	5.84003e-25	1.12409e-23
ARHGAP10	4q31.23	0.324284	6.05958e-25	1.16523e-23
ARHGAP24	4q21.23-q21.3	0.324254	6.1249e-25	1.17666e-23
KCNJ5	11q24.3	0.324084	6.49909e-25	1.24735e-23
HAS2	8q24.13	0.323907	6.91503e-25	1.32591e-23
CCL4L1	17q12 alternate reference locus	0.323848	7.05874e-25	1.35217e-23
GPX3	5q33.1	0.323667	7.51858e-25	1.43888e-23
SYK	9q22.2	0.323136	9.05109e-25	1.73051e-23
SH2D1B	1q23.3	0.323098	9.17256e-25	1.75206e-23
ADRB2	5q32	0.322849	1.00034e-24	1.90893e-23
CXORF65	Xq13.1	0.322715	1.04807e-24	1.99812e-23
CYP1B1-AS1	2p22.2	0.322578	1.09916e-24	2.09353e-23
B4GALT5	20q13.13	0.322365	1.18365e-24	2.25232e-23
SAMD4A	14q22.2	0.322242	1.23565e-24	2.34902e-23
PLAGL1	6q24.2	0.322159	1.27162e-24	2.41512e-23
IFNGR1	6q23.3	0.321981	1.35272e-24	2.56672e-23
AKAP12	6q25.1	0.321972	1.35702e-24	2.57244e-23
CXCR4	2q22.1	0.321852	1.4146e-24	2.67904e-23
CLEC6A	12p13.31	0.321712	1.48497e-24	2.80966e-23
FCMR	1q32.1	0.321648	1.51847e-24	2.87033e-23
HAAO	2p21	0.321303	1.71129e-24	3.22932e-23
FAM89A	1q42.2	0.321302	1.71161e-24	3.22932e-23
FSTL1	3q13.33	0.32123	1.75531e-24	3.30865e-23
PTGFR	1p31.1	0.321216	1.76352e-24	3.32098e-23
TACR1	2p12	0.321153	1.80263e-24	3.39146e-23
BACH2	6q15	0.321145	1.80768e-24	3.39777e-23
ARRB2	17p13.2	0.32111	1.82942e-24	3.43539e-23
RHOJ	14q23.2	0.321088	1.84317e-24	3.45797e-23
NRP2	2q33.3	0.320915	1.95713e-24	3.66833e-23
ALDH1A2	15q21.3	0.320739	2.07962e-24	3.89428e-23
TNFSF12-TNFSF13	17p13.1	0.320715	2.0972e-24	3.92352e-23
CLEC17A	19p13.12	0.320695	2.11143e-24	3.94647e-23
ARNTL2	12p11.23	0.320647	2.14744e-24	4.01003e-23
RPS6KA3	Xp22.12	0.320567	2.20695e-24	4.11731e-23
RHOG	11p15.4	0.32049	2.26663e-24	4.22471e-23
KLRC4	12p13.2	0.320339	2.38805e-24	4.44689e-23
LRRK1	15q26.3	0.320299	2.42096e-24	4.50398e-23
NOD1	7p14.3	0.32015	2.54894e-24	4.73767e-23
DERL3	22q11.23	0.320133	2.5637e-24	4.76069e-23
ALDH1A3	15q26.3	0.320071	2.61963e-24	4.86003e-23
LILRA1	19q13.42	0.319981	2.70146e-24	5.0072e-23
MEP1A	6p12.3	0.319787	2.88821e-24	5.3484e-23
CDX1	5q32	0.319744	2.93164e-24	5.42381e-23
EGR2	10q21.3	0.319657	3.02012e-24	5.58235e-23
SIPA1	11q13.1	0.319604	3.07585e-24	5.6801e-23
SAT1	Xp22.11	0.319382	3.32021e-24	6.12572e-23
MSR1	8p22	0.31925	3.47396e-24	6.40348e-23
FBLN5	14q32.12	0.319112	3.64361e-24	6.71001e-23
HLA-DPB2	6p21.32	0.318991	3.79763e-24	6.98722e-23
GAL3ST4	7q22.1	0.318399	4.65286e-24	8.55289e-23
HAMP	19q13.12	0.318273	4.85696e-24	8.91987e-23
CEMIP2	9q21.13	0.318118	5.12289e-24	9.39963e-23
RELT	11q13.4	0.318096	5.1609e-24	9.4607e-23
CSF1	1p13.3	0.318089	5.17346e-24	9.47505e-23
CARD9	9q34.3	0.318004	5.32564e-24	9.74486e-23
LINC01366	5q35.1	0.317924	5.47414e-24	1.00074e-22
FAM126A	7p15.3	0.317757	5.7944e-24	1.05832e-22
DPP4	2q24.2	0.317618	6.07624e-24	1.10879e-22
VIM	10p13	0.317592	6.13137e-24	1.11783e-22
FBLN2	3p25.1	0.317554	6.21148e-24	1.13141e-22
DAPK1	9q21.33	0.317545	6.23021e-24	1.13378e-22
BEST1	11q12.3	0.317499	6.32857e-24	1.15064e-22
ATP8B4	15q21.2	0.317424	6.49327e-24	1.17951e-22
CXCR2P1	2q35	0.31733	6.70438e-24	1.21676e-22
SNAI1	20q13.13	0.317254	6.87948e-24	1.2474e-22
LHFPL6	13q13.3-q14.11	0.317172	7.07473e-24	1.28165e-22
SPATS2L	2q33.1	0.316987	7.53721e-24	1.36419e-22
RAP2B	3q25.2	0.316908	7.7421e-24	1.40001e-22
PARP14	3q21.1	0.316687	8.34549e-24	1.50776e-22
KIAA1755	20q11.23	0.316614	8.55656e-24	1.5445e-22
RNASE2	14q11.2	0.316533	8.79576e-24	1.58625e-22
PCSK5	9q21.13	0.316444	9.06556e-24	1.63343e-22
QKI	6q26	0.316427	9.11784e-24	1.64138e-22
MXRA5	Xp22.33	0.316283	9.57514e-24	1.72215e-22
TIMD4	5q33.3	0.316006	1.05196e-23	1.89031e-22
AKT3	1q43-q44	0.315853	1.10795e-23	1.98914e-22
MEF2C	5q14.3	0.315834	1.11526e-23	2.00047e-22
STAT2	12q13.3	0.315808	1.1252e-23	2.0165e-22
MYO7B	2q14.3	0.315796	1.12981e-23	2.02295e-22
TMEM156	4p14	0.315685	1.1732e-23	2.09876e-22
GM2A	5q33.1	0.315626	1.1968e-23	2.13906e-22
DISC1	1q42.2	0.315476	1.25904e-23	2.2483e-22
LIF	22q12.2	0.315164	1.39935e-23	2.49663e-22
ITIH1	3p21.1	0.315131	1.41503e-23	2.52236e-22
SERPINF2	17p13.3	0.315126	1.41761e-23	2.5247e-22
ECEL1	2q37.1	0.314824	1.57003e-23	2.79367e-22
IRAG1	11p15.4	0.31466	1.65907e-23	2.94949e-22
SVEP1	9q31.3	0.314655	1.66205e-23	2.95217e-22
TMEM71	8q24.22	0.314438	1.78871e-23	3.17432e-22
TMEM255B	13q34	0.314398	1.81249e-23	3.21367e-22
CEACAM3	19q13.2	0.314372	1.82901e-23	3.24011e-22
IL10RB	21q22.11	0.314345	1.8455e-23	3.26642e-22
TNFRSF6B	20q13.33	0.314318	1.86262e-23	3.29381e-22
GALM	2p22.1	0.314309	1.86778e-23	3.30003e-22
MBNL1	3q25.1-q25.2	0.31427	1.89255e-23	3.34083e-22
HIC1	17p13.3	0.314219	1.92569e-23	3.39634e-22
SHD	19p13.3	0.314045	2.04199e-23	3.59828e-22
XAF1	17p13.2	0.314002	2.07182e-23	3.64764e-22
CAVIN1	17q21.2	0.31398	2.08725e-23	3.67157e-22
RAB32	6q24.3	0.313927	2.12462e-23	3.73403e-22
ASGR1	17p13.1	0.313819	2.20341e-23	3.86911e-22
SERPINE1	7q22.1	0.313715	2.28145e-23	4.00264e-22
LGI4	19q13.12	0.313596	2.37466e-23	4.16251e-22
MECOM	3q26.2	0.313492	2.4595e-23	4.30746e-22
C1QTNF1	17q25.3	0.313225	2.69052e-23	4.70794e-22
PLVAP	19p13.11	0.313183	2.72812e-23	4.76957e-22
HS3ST3A1	17p12	0.313141	2.76766e-23	4.83447e-22
ABCC4	13q32.1	0.313046	2.85705e-23	4.98626e-22
LINC01550	14q32.2	0.312861	3.04027e-23	5.30141e-22
PTK2B	8p21.2	0.312814	3.08825e-23	5.38038e-22
CALHM5	6q22.1	0.312737	3.16906e-23	5.51637e-22
LPAR5	12p13.31	0.312361	3.5942e-23	6.25098e-22
SLCO2A1	3q22.1-q22.2	0.31211	3.90964e-23	6.79368e-22
HSF5	17q22	0.311938	4.14002e-23	7.18777e-22
GNAI2	3p21.31	0.311637	4.57836e-23	7.94191e-22
MMP2	16q12.2	0.311592	4.64801e-23	8.05575e-22
EDN1	6p24.1	0.31156	4.69779e-23	8.13498e-22
MDFIC	7q31.1-q31.2	0.311367	5.01053e-23	8.66904e-22
DHH	12q13.12	0.311301	5.12091e-23	8.85237e-22
LACC1	13q14.11	0.311274	5.16786e-23	8.92582e-22
HOPX	4q12	0.311234	5.23765e-23	9.03855e-22
HOXA1	7p15.2	0.31087	5.91136e-23	1.01924e-21
IL2	4q27	0.310799	6.05281e-23	1.04273e-21
PLAUR	19q13	0.310793	6.06472e-23	1.04388e-21
NFKB2	10q24.32	0.310687	6.28247e-23	1.08043e-21
PDE4D	5q11.2-q12.1	0.310565	6.54317e-23	1.1243e-21
RECK	9p13.3	0.310363	6.99727e-23	1.2013e-21
PROS1	3q11.1	0.310257	7.24788e-23	1.24326e-21
BMP2	20p12.3	0.310047	7.77245e-23	1.3321e-21
LYVE1	11p15.4	0.309977	7.95388e-23	1.36203e-21
ATOH8	2p11.2	0.309801	8.43252e-23	1.44275e-21
SDCBP	8q12.1	0.309648	8.87088e-23	1.51646e-21
CTSK	1q21.3	0.30962	8.95356e-23	1.52929e-21
CCL3	17q12	0.30961	8.98201e-23	1.53284e-21
MYO9B	19p13.11	0.309579	9.07545e-23	1.54747e-21
TNC	9q33.1	0.309481	9.37489e-23	1.59716e-21
GEM	8q22.1	0.309407	9.60818e-23	1.63551e-21
IRAK3	12q14.3	0.309211	1.02502e-22	1.74332e-21
IFIT3	10q23.31	0.308911	1.13201e-22	1.92365e-21
STAC3	12q13.3	0.308905	1.13432e-22	1.92593e-21
SP140L	2q37.1	0.308817	1.16753e-22	1.98065e-21
RGS1	1q31.2	0.308689	1.21792e-22	2.06438e-21
MERTK	2q13	0.308608	1.25126e-22	2.1191e-21
SYNE3	14q32.13	0.308561	1.27062e-22	2.15006e-21
RNF19B	1p35.1	0.308467	1.31085e-22	2.21627e-21
SV2B	15q26.1	0.308332	1.37017e-22	2.31461e-21
EBF1	5q33.3	0.308245	1.41007e-22	2.38e-21
RAB20	13q34	0.308106	1.47641e-22	2.48987e-21
CHIT1	1q32.1	0.308005	1.52622e-22	2.57171e-21
CXCL2	4q13.3	0.307903	1.57813e-22	2.65695e-21
RNF217	6q22.31	0.307772	1.64792e-22	2.7721e-21
KCNJ12	17p11.2	0.307692	1.69191e-22	2.84371e-21
PRR16	5q23.1	0.307684	1.69626e-22	2.84863e-21
SAA2	11p15.1	0.307653	1.71344e-22	2.87507e-21
SLC16A7	12q14.1	0.307377	1.87626e-22	3.14564e-21
G0S2	1q32.2	0.307275	1.94019e-22	3.25011e-21
RASGRF2	5q14.1	0.307186	1.99734e-22	3.34304e-21
CORO2B	15q23	0.306968	2.14566e-22	3.5883e-21
FMO1	1q24.3	0.306804	2.26378e-22	3.78267e-21
JAK2	9p24.1	0.306723	2.32469e-22	3.88121e-21
GSDMC	8q24.21	0.306666	2.36843e-22	3.95093e-21
SPNS3	17p13.2	0.306639	2.38974e-22	3.98317e-21
TWIST2	2q37.3	0.30655	2.46049e-22	4.09768e-21
TNFSF15	9q32	0.306462	2.53192e-22	4.21314e-21
ADGRF5	6p12.3	0.30642	2.56763e-22	4.269e-21
ARHGAP17	16p12.1	0.306247	2.71643e-22	4.51266e-21
TLE4	9q21.31	0.306205	2.75454e-22	4.57218e-21
PALD1	10q22.1	0.305978	2.96609e-22	4.91924e-21
HRH2	5q35.2	0.305962	2.98225e-22	4.94195e-21
LATS2	13q12.11	0.305957	2.98643e-22	4.94478e-21
IFI44L	1p31.1	0.305785	3.15947e-22	5.22696e-21
MIR100HG	11q24.1	0.305631	3.32192e-22	5.49117e-21
ITM2C	2q37.1	0.305152	3.88366e-22	6.41444e-21
TNFSF18	1q25.1	0.305142	3.89657e-22	6.43046e-21
IGFBP3	7p12.3	0.305132	3.90814e-22	6.44424e-21
ANKRD22	10q23.31	0.305012	4.06441e-22	6.69641e-21
RCBTB2	13q14.2	0.304923	4.18359e-22	6.8871e-21
NEDD4L	18q21.31	-0.304748	4.42888e-22	7.28491e-21
PRKCA	17q24.2	0.304601	4.64621e-22	7.63611e-21
DCN	12q21.33	0.304589	4.66323e-22	7.6578e-21
BGN	Xq28	0.304569	4.69343e-22	7.70107e-21
AMPD1	1p13.2	0.304486	4.82167e-22	7.90501e-21
THSD7A	7p21.3	0.304338	5.05982e-22	8.28867e-21
ADORA2A	22q11.23	0.304138	5.39857e-22	8.83636e-21
HLA-H	6p22.1	0.304089	5.48564e-22	8.97154e-21
HMOX1	22q12.3	0.303831	5.96345e-22	9.74501e-21
PLAU	10q22.2	0.303773	6.07729e-22	9.92294e-21
S1PR2	19p13.2	0.303747	6.12876e-22	9.99881e-21
LRRC32	11q13.5	0.303652	6.31892e-22	1.03007e-20
MAP7D3	Xq26.3	0.303626	6.3729e-22	1.03802e-20
SYDE1	19p13.12	0.3035	6.6371e-22	1.08017e-20
ADAMTS1	21q21.3	0.303482	6.67582e-22	1.08559e-20
RSAD2	2p25.2	0.303309	7.06043e-22	1.14721e-20
SPATC1	8q24.3	0.303016	7.76183e-22	1.26015e-20
MGAT3	22q13.1	0.302973	7.87127e-22	1.27688e-20
HCG26	6p21.3	0.302868	8.14094e-22	1.31956e-20
SEMA4D	9q22.2	0.302734	8.50259e-22	1.37706e-20
MALL	2q13	0.302568	8.97001e-22	1.45159e-20
LIMS2	2q14.3	0.302422	9.40125e-22	1.52015e-20
CACNA1E	1q25.3	0.302387	9.50649e-22	1.53592e-20
RILP	17p13.3	0.302306	9.7587e-22	1.5754e-20
RGS13	1q31.2	0.302195	1.01141e-21	1.63146e-20
POM121L9P	22q11.23	0.30145	1.28511e-21	2.07129e-20
FAT4	4q28.1	0.301357	1.32398e-21	2.13221e-20
GSDME	7p15.3	0.301337	1.33224e-21	2.14379e-20
F2R	5q13.3	0.301313	1.34247e-21	2.15852e-20
FCAR	19q13.42	0.30131	1.34417e-21	2.15952e-20
TMEM266	15q24.2	0.301164	1.40827e-21	2.26068e-20
FLNC	7q32.1	0.301153	1.41314e-21	2.26669e-20
CD82	11p11.2	0.301142	1.41854e-21	2.27352e-20
GAPT	5q11.2	0.301084	1.44497e-21	2.31403e-20
TSHR	14q24-q31	0.300956	1.50555e-21	2.40913e-20
C11ORF96	11p11.2	0.300935	1.51549e-21	2.42309e-20
AQP9	15q21.3	0.300912	1.52698e-21	2.43952e-20
SYNPO2	4q26	0.300833	1.56587e-21	2.49965e-20
RSU1	10p13	0.300724	1.62131e-21	2.58608e-20
PLPP7	9q34.13	0.300681	1.64382e-21	2.6199e-20
CLEC4G	19p13.2	0.300585	1.69513e-21	2.69953e-20
SOX7	8p23.1	0.300521	1.73035e-21	2.75343e-20
TNFRSF1A	12p13.31	0.300334	1.83671e-21	2.92035e-20
DYNLT5	1p31.3	0.300239	1.8934e-21	3.00811e-20
GIPC2	1p31.1	0.300108	1.97414e-21	3.13389e-20
C10ORF105	10q22.1	0.300009	2.03797e-21	3.23265e-20
KCNT2	1q31.3	0.299847	2.1461e-21	3.40147e-20
PTGS1	9q33.2	0.299679	2.26376e-21	3.58512e-20
TRIM21	11p15.4	0.299556	2.35439e-21	3.72571e-20
TCF4	18q21.2	0.299492	2.40286e-21	3.7994e-20
CAV1	7q31.2	0.299454	2.43196e-21	3.84238e-20
EHD4	15q15.1	0.299272	2.57669e-21	4.06784e-20
ABCA9	17q24.2	0.299265	2.58297e-21	4.07454e-20
TYMP	22q13.33	0.299226	2.61517e-21	4.12208e-20
CCN4	8q24.22	0.299113	2.71051e-21	4.269e-20
LCN10	9q34.3	0.299026	2.78722e-21	4.38636e-20
RAB27A	15q21.3	0.298852	2.94493e-21	4.63093e-20
RPS6KA4	11q13.1	0.298834	2.96232e-21	4.6546e-20
HLA-A	6p22.1	0.298782	3.01112e-21	4.72757e-20
SOWAHD	Xq24	0.29874	3.05225e-21	4.7884e-20
APOBEC3D	22q13.1	0.29841	3.38884e-21	5.31227e-20
CD300E	17q25.1	0.298385	3.41567e-21	5.35014e-20
SEMA3A	7q21.11	0.298333	3.47221e-21	5.43445e-20
TNXB	6p21.33-p21.32	0.298305	3.5031e-21	5.47853e-20
AICDA	12p13.31	0.298256	3.55856e-21	5.5609e-20
NFIL3	9q22.31	0.298201	3.62063e-21	5.65349e-20
ZFP36L2	2p21	0.29806	3.78682e-21	5.90838e-20
NME8	7p14.1	0.298051	3.79744e-21	5.92033e-20
PSMB10	16q22.1	0.298029	3.82373e-21	5.95669e-20
LMOD1	1q32.1	0.297991	3.86992e-21	6.02396e-20
ANXA2R	5p12	0.297904	3.97732e-21	6.18633e-20
HIF1A	14q23.2	0.297765	4.15664e-21	6.46022e-20
FNBP1	9q34.11	0.297738	4.193e-21	6.51167e-20
CD34	1q32.2	0.29749	4.53403e-21	7.03583e-20
GP1BA	17p13.2	0.297447	4.59649e-21	7.12723e-20
PCOLCE	7q22.1	0.297367	4.71369e-21	7.30329e-20
BATF2	11q13.1	0.297245	4.89888e-21	7.58436e-20
LINC01140	1p22.3	0.29694	5.39344e-21	8.34357e-20
PLPPR4	1p21.3-p21.2	0.296836	5.57425e-21	8.61663e-20
ADCY4	14q12	0.296788	5.65811e-21	8.73951e-20
MAP3K7CL	21q21.3	0.296715	5.78989e-21	8.93616e-20
JPH4	14q11.2	0.29664	5.92766e-21	9.14175e-20
MID1	Xp22	0.296464	6.2664e-21	9.65672e-20
LINC02908	9q34.3	0.296391	6.4119e-21	9.87334e-20
LAMB1	7q31.1	0.296303	6.59245e-21	1.01436e-19
SUDS3	12q24.23	-0.296121	6.98095e-21	1.07331e-19
LPCAT2	16q12.2	0.296118	6.98657e-21	1.07335e-19
BCL6B	17p13.1	0.295971	7.31695e-21	1.12324e-19
ROBO4	11q24.2	0.29594	7.38821e-21	1.13331e-19
B3GALT2	1q31.2	0.295919	7.43797e-21	1.14007e-19
ITIH3	3p21.1	0.295903	7.47356e-21	1.14465e-19
PEAR1	1q23.1	0.295769	7.79471e-21	1.19292e-19
TLR1	4p14	0.295584	8.26075e-21	1.26328e-19
TGFBI	5q31.1	0.295467	8.57135e-21	1.30978e-19
UTS2	1p36.23	0.295441	8.64074e-21	1.31938e-19
ETV7	6p21.31	0.295383	8.79981e-21	1.34264e-19
AOC1	7q36.1	0.295324	8.96213e-21	1.36637e-19
TSPAN2	1p13.2	0.295312	8.99544e-21	1.3704e-19
TRIM69	15q15-q21	0.295264	9.13198e-21	1.39014e-19
HIVEP2	6q24.2	0.295235	9.21544e-21	1.40178e-19
LDB2	4p15.32	0.295211	9.28502e-21	1.4113e-19
SLC38A5	Xp11.23	0.29514	9.49439e-21	1.44202e-19
DIO3	14q32.31	0.295103	9.60614e-21	1.45789e-19
KIF17	1p36.12	0.294793	1.05819e-20	1.60475e-19
C10ORF55	10q22.2	0.294716	1.08396e-20	1.64259e-19
MAP3K8	10p11.23	0.294671	1.09952e-20	1.66492e-19
SHISAL2A	1p32.3	0.294661	1.10292e-20	1.6688e-19
KLHDC7B	22q13.33	0.294606	1.12186e-20	1.69617e-19
RELN	7q22.1	0.294554	1.14044e-20	1.72297e-19
CORO1C	12q24.11	0.294498	1.16041e-20	1.75174e-19
BICC1	10q21.1	0.294496	1.16123e-20	1.75174e-19
HCP5	6p21.33	0.294437	1.18298e-20	1.7832e-19
CYB5R3	22q13.2	0.294409	1.19333e-20	1.79744e-19
PSAP	10q22.1	0.294401	1.19606e-20	1.8002e-19
APOBEC3A	22q13.1	0.294312	1.22983e-20	1.84965e-19
S100A12	1q21.3	0.29426	1.24991e-20	1.87843e-19
CCDC71L	7q22.3	0.294109	1.31014e-20	1.96747e-19
SCARA5	8p21.1	0.294028	1.34375e-20	2.01643e-19
CX3CL1	16q21	0.293974	1.36666e-20	2.04927e-19
EHBP1L1	11q13.1	0.293939	1.38144e-20	2.06989e-19
IL1RL1	2q12.1	0.293918	1.39044e-20	2.08182e-19
LRRN4CL	11q12.3	0.293889	1.40331e-20	2.09951e-19
IRX5	16q12.2	-0.293651	1.51133e-20	2.25944e-19
IL22RA2	6q23.3	0.293441	1.61308e-20	2.40975e-19
SPSB1	1p36.22	0.293369	1.64958e-20	2.46244e-19
SDS	12q24.13	0.29331	1.68037e-20	2.50653e-19
FOXA1	14q21.1	-0.293267	1.70301e-20	2.53841e-19
FCHO1	19p13.11	0.293046	1.82385e-20	2.71651e-19
BMX	Xp22.2	0.293024	1.83607e-20	2.73268e-19
PLEKHG2	19q13.2	0.293001	1.84965e-20	2.75084e-19
PRDM16	1p36.32	0.292959	1.87374e-20	2.78459e-19
LIME1	20q13.33	0.292899	1.90893e-20	2.83478e-19
MAP1LC3C	1q43	0.292692	2.03529e-20	3.0202e-19
PKIA	8q21.13	0.292674	2.04687e-20	3.03512e-19
HPSE	4q21.23	0.292653	2.06011e-20	3.0525e-19
SGTB	5q12.3	0.292585	2.10446e-20	3.11591e-19
ACTN1	14q24.1	0.292403	2.2262e-20	3.29372e-19
PIPOX	17q11.2	0.292371	2.2481e-20	3.32367e-19
BTBD19	1p34.1	0.292342	2.26881e-20	3.35182e-19
C15ORF39	15q24.2	0.292276	2.31517e-20	3.41778e-19
STAT1	2q32.2	0.292247	2.33613e-20	3.44618e-19
VEGFC	4q34.3	0.292102	2.44376e-20	3.6023e-19
ARPC2	2q35	0.292042	2.48921e-20	3.6666e-19
RASSF5	1q32.1	0.292032	2.49687e-20	3.67517e-19
ACHE	7q22.1	0.292015	2.51009e-20	3.69192e-19
FGD5	3p25.1	0.291916	2.58824e-20	3.80406e-19
CCN1	1p22.3	0.291867	2.62769e-20	3.85921e-19
BIN1	2q14.3	0.291844	2.64624e-20	3.88361e-19
ADAMTS2	5q35.3	0.291621	2.83545e-20	4.15824e-19
MEOX1	17q21.31	0.291616	2.83944e-20	4.16105e-19
CXCL1	4q13.3	0.291521	2.92405e-20	4.28191e-19
DPPA4	3q13.13	0.291336	3.09596e-20	4.53033e-19
GPR15	3q11.2	0.291214	3.21375e-20	4.69926e-19
CHL1	3p26.3	0.291058	3.37252e-20	4.92782e-19
TNFSF9	19p13.3	0.290876	3.567e-20	5.20819e-19
RFTN2	2q33.1	0.290821	3.62765e-20	5.29288e-19
FAM110D	1p36.11	0.290762	3.69393e-20	5.38566e-19
BHMT2	5q14.1	0.290478	4.03154e-20	5.87361e-19
HBEGF	5q31.3	0.290416	4.10852e-20	5.98141e-19
ZNF396	18q12.2	-0.290325	4.22536e-20	6.14704e-19
TFPI2	7q21.3	0.290109	4.51514e-20	6.56385e-19
FCRL4	1q23.1	0.290062	4.58041e-20	6.65389e-19
DIO2	14q31.1	0.289923	4.78043e-20	6.93943e-19
MCOLN2	1p22.3	0.289384	5.63813e-20	8.17856e-19
CES1	16q12.2	0.289378	5.64787e-20	8.18675e-19
TRAM1L1	4q26	-0.289347	5.70246e-20	8.25991e-19
CAP1	1p34.2	0.289342	5.71119e-20	8.26657e-19
IQSEC3	12p13.33	0.289306	5.77368e-20	8.35098e-19
RASGEF1B	4q21.21	0.289244	5.88519e-20	8.50612e-19
IRF1-AS1	5q31.1	0.28907	6.20668e-20	8.96431e-19
PLSCR1	3q24	0.288977	6.38458e-20	9.2146e-19
ABCC9	12p12.1	0.28894	6.45799e-20	9.31384e-19
PLB1	2p23.2	0.28889	6.55617e-20	9.44863e-19
SCN9A	2q24.3	0.288814	6.71048e-20	9.66405e-19
PHACTR2	6q24.2	0.288799	6.74063e-20	9.7005e-19
LRCH2	Xq23	0.288708	6.93212e-20	9.9689e-19
RNF122	8p12	0.288698	6.95331e-20	9.9922e-19
SAA1	11p15.1	0.288673	7.00581e-20	1.00604e-18
LONRF3	Xq24	0.288618	7.12435e-20	1.02233e-18
PAQR8	6p12.2	0.288338	7.75894e-20	1.1126e-18
BTN2A2	6p22.2	0.287984	8.64196e-20	1.23783e-18
SCPEP1	17q22	0.287983	8.64463e-20	1.23783e-18
PRKCH	14q23.1	0.28796	8.7052e-20	1.24561e-18
CNNM3	2q11.2	-0.287893	8.88536e-20	1.27048e-18
MYH9	22q12.3	0.287755	9.26594e-20	1.32395e-18
GLI2	2q14.2	0.287634	9.61191e-20	1.3724e-18
MSL3	Xp22.2	0.287481	1.00686e-19	1.43659e-18
HAS1	19q13.41	0.287424	1.02442e-19	1.4606e-18
PODN	1p32.3	0.287264	1.07541e-19	1.53222e-18
EPHA2	1p36.13	0.286928	1.1908e-19	1.69541e-18
PARM1	4q13.3	0.286921	1.19329e-19	1.69775e-18
PEX5L	3q26.33	-0.286862	1.21472e-19	1.727e-18
ANKRD55	5q11.2	0.286655	1.29342e-19	1.8376e-18
CILP	15q22.31	0.286555	1.33325e-19	1.89284e-18
PRELP	1q32.1	0.286543	1.33792e-19	1.89812e-18
RGS2	1q31.2	0.286507	1.35257e-19	1.91755e-18
SRPX	Xp11.4	0.286424	1.38696e-19	1.96491e-18
KCNS2	8q22.2	0.286364	1.41256e-19	1.99977e-18
IL23R	1p31.3	0.286256	1.45914e-19	2.06424e-18
ACRBP	12p13.31	0.286132	1.51511e-19	2.14191e-18
MYCT1	6q25.2	0.28603	1.56211e-19	2.2068e-18
EPHB6	7q34	0.285976	1.58807e-19	2.24189e-18
JCAD	10p11.23	0.285941	1.60494e-19	2.26369e-18
CYP19A1	15q21.2	0.285939	1.60578e-19	2.26369e-18
L3HYPDH	14q23.1	0.285932	1.60941e-19	2.26722e-18
TAMALIN	12q13.13	0.285652	1.75088e-19	2.46477e-18
PCBP3	21q22.3	0.285471	1.84938e-19	2.60161e-18
KIR3DX1	19q13.42	0.285136	2.04533e-19	2.87524e-18
PRKD1	14q12	0.285099	2.06809e-19	2.90519e-18
FBXO21	12q24.22	-0.285042	2.10416e-19	2.95379e-18
LOXL4	10q24.2	0.284966	2.15261e-19	3.01968e-18
CCN2	6q23.2	0.284942	2.16811e-19	3.0393e-18
P2RX7	12q24.31	0.284765	2.28683e-19	3.20348e-18
RNF145	5q33.3	0.284594	2.40687e-19	3.36928e-18
NDN	15q11.2	0.284572	2.42316e-19	3.38971e-18
OTOA	16p12.2	0.284556	2.43446e-19	3.40314e-18
TBX5	12q24.21	0.284527	2.45598e-19	3.43082e-18
ACKR4	3q22.1	0.284492	2.48186e-19	3.46456e-18
MEOX2	7p21.2	0.284426	2.53177e-19	3.53178e-18
DPYSL3	5q32	0.284384	2.56364e-19	3.57374e-18
PRRX1	1q24.2	0.284376	2.56937e-19	3.57864e-18
LTBP1	2p22.3	0.284375	2.57073e-19	3.57864e-18
MFAP4	17p11.2	0.2843	2.62919e-19	3.65749e-18
TRAPPC3L	6q22.1	0.284254	2.66514e-19	3.70492e-18
CR2	1q32.2	0.284241	2.67606e-19	3.71751e-18
GET1	21q22.2	-0.284238	2.67813e-19	3.71782e-18
F13A1	6p25.1	0.284053	2.83095e-19	3.92723e-18
ANGPTL2	9q33.3	0.284042	2.84033e-19	3.93751e-18
TBX18	6q14.3	0.284024	2.85518e-19	3.95536e-18
GPR34	Xp11.4	0.283983	2.89094e-19	4.00214e-18
EHD1	11q13.1	0.28395	2.91905e-19	4.03825e-18
RNF166	16q24.2-q24.3	0.283932	2.93526e-19	4.05787e-18
ST18	8q11.23	0.283823	3.03235e-19	4.18921e-18
SLC6A6	3p25.1	0.28382	3.03502e-19	4.19e-18
SPRY1	4q28.1	0.28374	3.10864e-19	4.28868e-18
ADGRG6	6q24.2	0.283719	3.12822e-19	4.31272e-18
KCNJ8	12p12.1	0.283704	3.14259e-19	4.32955e-18
CTSD	11p15.5	0.283594	3.24723e-19	4.47063e-18
TRIM61	4q32.3	0.28358	3.2615e-19	4.48719e-18
OAF	11q23.3	0.283541	3.29958e-19	4.53648e-18
EPB41L2	6q23.1-q23.2	0.283502	3.33846e-19	4.58677e-18
PRXL2C	9q22.33	0.283366	3.47617e-19	4.7727e-18
HS3ST1	4p15.33	0.283301	3.54494e-19	4.86379e-18
LAMA4	6q21	0.28315	3.70771e-19	5.08363e-18
MAP3K14	17q21.31	0.28295	3.93588e-19	5.39277e-18
KSR1	17q11.2	0.282883	4.01522e-19	5.49772e-18
C2CD4B	15q22.2	0.282644	4.3117e-19	5.89963e-18
CPXM1	20p13	0.282567	4.41083e-19	6.03114e-18
EPHA4	2q36.1	0.28248	4.5277e-19	6.18672e-18
ZNF84	12q24.33	-0.28247	4.5406e-19	6.20011e-18
RDH10	8q21.11	0.282405	4.62863e-19	6.31601e-18
CHRDL1	Xq23	0.282065	5.12076e-19	6.9828e-18
RUNX1T1	8q21.3	0.282038	5.16228e-19	7.03461e-18
ATF3	1q32.3	0.281939	5.31722e-19	7.24082e-18
CD58	1p13.1	0.28191	5.36198e-19	7.29682e-18
RIC8B	12q23.3	-0.281816	5.51367e-19	7.49814e-18
GRK5	10q26.11	0.281689	5.72616e-19	7.78182e-18
ACTR3	2q14.1	0.281578	5.91812e-19	8.03724e-18
TMCC3	12q22	0.281298	6.42993e-19	8.7264e-18
MDS2	1p36	0.28122	6.58025e-19	8.92435e-18
SMIM10	Xq26.3	0.281163	6.6924e-19	9.07031e-18
DACT1	14q23.1	0.281037	6.94684e-19	9.40879e-18
GSDMA	17q21.1	0.280952	7.12321e-19	9.64114e-18
TMEM130	7q22.1	0.280932	7.16416e-19	9.69001e-18
RPRD1A	18q12.2	-0.280738	7.58854e-19	1.02571e-17
ST6GALNAC1	17q25.1	0.280714	7.64248e-19	1.0323e-17
RGS16	1q25.3	0.280675	7.72973e-19	1.04338e-17
CLMP	11q24.1	0.280569	7.97499e-19	1.07576e-17
THY1	11q23.3	0.280539	8.04648e-19	1.08468e-17
FFAR4	10q23.33	0.280534	8.05972e-19	1.08573e-17
TFEB	6p21.1	0.280517	8.09871e-19	1.09025e-17
REC8	14q12	0.280424	8.32498e-19	1.11996e-17
FAM107A	3p14.3-p14.2	0.280404	8.37499e-19	1.12593e-17
LUM	12q21.33	0.280353	8.5018e-19	1.14221e-17
ACY3	11q13.2	0.280343	8.52511e-19	1.14457e-17
GSN	9q33.2	0.280332	8.55379e-19	1.14765e-17
GLI1	12q13.3	0.280281	8.68364e-19	1.16429e-17
SNCA	4q22.1	0.280267	8.71849e-19	1.16818e-17
DPYS	8q22.3	0.280232	8.81115e-19	1.17981e-17
PTPRB	12q15	0.280189	8.92331e-19	1.19403e-17
MET	7q31	0.280131	9.07624e-19	1.21368e-17
USP30	12q24.11	-0.280091	9.18275e-19	1.22711e-17
CLDN14	21q22.13	0.280064	9.25597e-19	1.23606e-17
BCDIN3D	12q13.12	-0.279886	9.7543e-19	1.30174e-17
ADAMTS3	4q13.3	0.279682	1.03595e-18	1.38117e-17
CLEC14A	14q21.1	0.279681	1.03633e-18	1.38117e-17
HPCAL4	1p34.2	0.279614	1.05684e-18	1.40758e-17
SSH1	12q24.11	0.279606	1.05942e-18	1.41008e-17
ARSI	5q32	0.279584	1.06613e-18	1.41806e-17
COL14A1	8q24.12	0.279475	1.10102e-18	1.4635e-17
SLC35G2	3q22.3	0.279445	1.11059e-18	1.47524e-17
SOX18	20q13.33	0.279418	1.11943e-18	1.48599e-17
CALD1	7q33	0.279388	1.12931e-18	1.49811e-17
CPNE2	16q13	0.2792	1.19339e-18	1.58207e-17
MAP7D1	1p34.3	0.278971	1.27658e-18	1.69123e-17
COL23A1	5q35.3	0.27895	1.28429e-18	1.70032e-17
ALDH3B1	11q13.2	0.278927	1.29299e-18	1.71071e-17
AEBP1	7p13	0.278793	1.34477e-18	1.77804e-17
EVC2	4p16.2	0.278748	1.36287e-18	1.80079e-17
GAS1	9q21.33	0.278727	1.37126e-18	1.81068e-17
IL21	4q27	0.278676	1.39167e-18	1.83642e-17
VSTM2L	20q11.23	0.27865	1.40239e-18	1.84935e-17
ZNF664	12q24.31	-0.278471	1.4778e-18	1.9475e-17
IL12RB2	1p31.3	0.278408	1.50524e-18	1.98236e-17
PLA2G2A	1p36.13	0.278351	1.5309e-18	2.01407e-17
ADAM8	10q26.3	0.27835	1.53133e-18	2.01407e-17
METTL24	6q21	0.278346	1.53279e-18	2.01467e-17
RAB3IL1	11q12.2-q12.3	0.278311	1.54864e-18	2.03417e-17
CNN2	19p13.3	0.278199	1.60041e-18	2.10078e-17
NR5A2	1q32.1	0.278164	1.61676e-18	2.12086e-17
TMBIM1	2q35	0.278063	1.66506e-18	2.18279e-17
KCNJ2	17q24.3	0.278037	1.67767e-18	2.19788e-17
SLIT3	5q34-q35.1	0.278	1.69591e-18	2.22032e-17
HAS2-AS1	8q24.13	0.277993	1.69945e-18	2.2235e-17
SOX17	8q11.23	0.277924	1.7343e-18	2.26761e-17
LINC02694	15q14	0.277889	1.75221e-18	2.28954e-17
SYT15	10q11.22	0.277859	1.76765e-18	2.30821e-17
FLRT2	14q31.3	0.277763	1.81769e-18	2.372e-17
PRNP	20p13	0.277716	1.84249e-18	2.4028e-17
CYBA	16q24.2	0.277711	1.84562e-18	2.40532e-17
WDR81	17p13.3	0.277518	1.95205e-18	2.54236e-17
C7	5p13.1	0.27748	1.97432e-18	2.5697e-17
STAT5A	17q21.2	0.277448	1.99267e-18	2.5919e-17
NPR1	1q21.3	0.277439	1.99788e-18	2.59698e-17
SCG2	2q36.1	0.277281	2.09219e-18	2.71781e-17
PLEKHG7	12q22	0.277057	2.23281e-18	2.89859e-17
COL4A3	2q36.3	0.276986	2.27929e-18	2.95703e-17
F10	13q34	0.276841	2.37764e-18	3.08262e-17
ZNF24	18q12.2	-0.276821	2.39181e-18	3.09791e-17
DHRS3	1p36.21	0.27682	2.39253e-18	3.09791e-17
CCDC82	11q21	0.276804	2.40302e-18	3.10884e-17
MMRN1	4q22.1	0.276803	2.40408e-18	3.10884e-17
PLA2G5	1p36.13	0.276561	2.57955e-18	3.3336e-17
BTN2A3P	6p22.2	0.276473	2.64567e-18	3.41684e-17
GDF6	8q22.1	0.276456	2.65892e-18	3.43174e-17
STK4	20q13.12	0.276446	2.66663e-18	3.43948e-17
ZNF438	10p11.23	0.276415	2.6905e-18	3.46802e-17
IRF5	7q32.1	0.276366	2.72966e-18	3.51623e-17
AQP1	7p14.3	0.276257	2.81745e-18	3.62699e-17
P2RX5	17p13.2	0.276161	2.89635e-18	3.72616e-17
IL12A	3q25.33	0.276035	3.00407e-18	3.86226e-17
BTN1A1	6p22.2	0.275998	3.03665e-18	3.90165e-17
DUSP7	3p21.2	0.275974	3.05751e-18	3.92593e-17
TMEM236	10p12.33	0.2759	3.1246e-18	4.00951e-17
TFAP2A	6p24.3	-0.275812	3.20486e-18	4.10985e-17
MTHFD1L	6q25.1	0.275795	3.22087e-18	4.12774e-17
GNG11	7q21.3	0.275633	3.37552e-18	4.32317e-17
NGFR	17q21.33	0.275447	3.56173e-18	4.55874e-17
ZFP36	19q13.2	0.275331	3.68266e-18	4.71052e-17
KMO	1q43	0.275313	3.7024e-18	4.73274e-17
TPP1	11p15.4	0.275222	3.80057e-18	4.85512e-17
TCEA3	1p36.12	-0.275108	3.92804e-18	5.01477e-17
WDR5B	3q21.1	-0.275092	3.94589e-18	5.03434e-17
SYPL2	1p13.3	0.275029	4.019e-18	5.12436e-17
TMEM255A	Xq24	0.274918	4.14945e-18	5.28731e-17
GPR82	Xp11.4	0.274874	4.20316e-18	5.35235e-17
SOGA3	6q22.33	0.274824	4.26354e-18	5.42578e-17
ZEB1	10p11.22	0.2748	4.29299e-18	5.45979e-17
IFI44	1p31.1	0.274689	4.43283e-18	5.63406e-17
FHL1	Xq26.3	0.274657	4.47448e-18	5.68339e-17
EFEMP2	11q13.1	0.274588	4.56346e-18	5.79273e-17
DPYSL2	8p21.2	0.274491	4.69291e-18	5.95328e-17
VNN3	6q23.2	0.274247	5.03395e-18	6.38187e-17
MFGE8	15q26.1	0.274159	5.16369e-18	6.54219e-17
TMEM204	16p13.3	0.274128	5.2096e-18	6.59619e-17
CLCN4	Xp22.2	0.274048	5.33013e-18	6.74453e-17
RAB42	1p35.3	0.273998	5.40772e-18	6.83839e-17
RBMS1	2q24.2	0.273993	5.41651e-18	6.84519e-17
OXER1	2p21	0.27389	5.57855e-18	7.04552e-17
PLEKHM2	1p36.21	0.273802	5.72157e-18	7.22159e-17
TREML1	6p21.1	0.273562	6.12874e-18	7.73063e-17
RFPL4B	6q21	0.273506	6.22906e-18	7.85222e-17
GKAP1	9q21.32	-0.273467	6.29838e-18	7.93461e-17
IFIT2	10q23.31	0.273349	6.51564e-18	8.20315e-17
ELK3	12q23.1	0.273334	6.54223e-18	8.23145e-17
HOXA9	7p15.2	0.273309	6.59029e-18	8.28671e-17
NTRK1	1q23.1	0.273051	7.09478e-18	8.91546e-17
VASH1	14q24.3	0.273042	7.11353e-18	8.93341e-17
SERPINB8	18q22.1	0.272922	7.36159e-18	9.23914e-17
ZNF20	19p13.2	-0.272729	7.78093e-18	9.75932e-17
RBP5	12p13.31	0.272652	7.95331e-18	9.96928e-17
SPARCL1	4q22.1	0.272536	8.22119e-18	1.02986e-16
KIR2DS4	19q13.42	0.272453	8.41765e-18	1.05381e-16
UBE2L6	11q12.1	0.272224	8.9862e-18	1.12429e-16
MT2A	16q13	0.272202	9.04462e-18	1.13089e-16
FERMT2	14q22.1	0.272043	9.46266e-18	1.18242e-16
FBLN1	22q13.31	0.272036	9.4813e-18	1.18401e-16
PPARG	3p25.2	0.27199	9.60797e-18	1.19908e-16
COL6A2	21q22.3	0.271821	1.00799e-17	1.2572e-16
RRN3P1	16p12.2	0.27175	1.02863e-17	1.28214e-16
ALPK2	18q21.31-q21.32	0.271606	1.07159e-17	1.33485e-16
SIGLEC11	19q13.33	0.271601	1.07307e-17	1.33507e-16
PDLIM7	5q35.3	0.271601	1.0731e-17	1.33507e-16
CCM2	7p13	0.271522	1.09762e-17	1.36473e-16
JSRP1	19p13.3	0.271452	1.11968e-17	1.39129e-16
ZFPM2	8q23	0.271429	1.12715e-17	1.39971e-16
ROBO3	11q24.2	0.271351	1.15215e-17	1.42987e-16
ANKRD44	2q33.1	0.271159	1.2169e-17	1.50929e-16
TSHZ3	19q12	0.27111	1.23399e-17	1.52954e-16
COL6A5	3q22.1	0.271067	1.24908e-17	1.54729e-16
HSPB6	19q13.12	0.271064	1.25007e-17	1.54755e-16
MARCO	2q14.2	0.270897	1.31094e-17	1.6219e-16
PTGS2	1q31.1	0.270783	1.35393e-17	1.67405e-16
CYGB	17q25.1	0.270755	1.36456e-17	1.68616e-16
PLXNC1	12q22	0.270692	1.38922e-17	1.71558e-16
FAP	2q24.2	0.270553	1.44492e-17	1.78325e-16
ZNF875	19q13.12	-0.270486	1.47289e-17	1.81666e-16
SLC35C1	11p11.2	0.270414	1.50295e-17	1.85188e-16
CSF2	5q31.1	0.270413	1.5033e-17	1.85188e-16
SHISA3	4p13	0.270374	1.52034e-17	1.87172e-16
HEATR9	17q12	0.270339	1.53523e-17	1.88889e-16
SH3RF3	2q13	0.270158	1.61615e-17	1.98723e-16
PNMA3	Xq28	0.270108	1.63889e-17	2.01395e-16
LINC00189	21q21.3	0.269734	1.82161e-17	2.23711e-16
IGFBP6	12q13.13	0.269702	1.83812e-17	2.25601e-16
CAV2	7q31.2	0.2697	1.83939e-17	2.25619e-16
CCL20	2q36.3	0.26967	1.85491e-17	2.27383e-16
NRN1	6p25.1	0.269576	1.90491e-17	2.33368e-16
MAML2	11q21	0.269447	1.97503e-17	2.41812e-16
PDGFRB	5q32	0.269369	2.01942e-17	2.47095e-16
CYP11A1	15q24.1	0.269352	2.02889e-17	2.48102e-16
CCL14	17q12	0.269134	2.15754e-17	2.63673e-16
ADGRE3	19p13.12	0.269106	2.17459e-17	2.65594e-16
IKBIP	12q23.1	0.269091	2.1834e-17	2.66508e-16
ANKH	5p15.2	0.269067	2.19841e-17	2.68176e-16
BNC2	9p22.3-p22.2	0.268847	2.3386e-17	2.85105e-16
FHL3	1p34.3	0.268777	2.38533e-17	2.90624e-16
ISM1	20p12.1	0.268742	2.40911e-17	2.93342e-16
KCNK13	14q32.11	0.268733	2.41476e-17	2.93852e-16
ADH1C	4q23	0.268703	2.43556e-17	2.96203e-16
TMEM106A	17q21.31	0.26865	2.47218e-17	3.00475e-16
ZCCHC24	10q22.3	0.26857	2.52819e-17	3.07096e-16
BCL2L14	12p13.2	0.268544	2.54715e-17	3.0921e-16
ST8SIA1	12p12.1	0.268518	2.56529e-17	3.11224e-16
RCAN2	6p12.3	0.268331	2.70389e-17	3.2784e-16
LRCH1	13q14.13-q14.2	0.268306	2.72258e-17	3.29907e-16
FABP5	8q21.13	0.268294	2.73183e-17	3.30827e-16
MYLK	3q21.1	0.268183	2.8185e-17	3.41117e-16
IL1B	2q14.1	0.268126	2.86406e-17	3.46421e-16
PSMA8	18q11.2	0.267913	3.04008e-17	3.6749e-16
MCAM	11q23.3	0.267794	3.14298e-17	3.79699e-16
CETP	16q13	0.267766	3.16725e-17	3.82401e-16
COL4A2	13q34	0.267739	3.19187e-17	3.8514e-16
AP1M2	19p13.2	-0.267704	3.22304e-17	3.88668e-16
SH3BGRL3	1p36.11	0.267622	3.29757e-17	3.97416e-16
RUNX2	6p21.1	0.267579	3.3381e-17	4.02058e-16
COL6A3	2q37.3	0.267459	3.45145e-17	4.15461e-16
LRFN5	14q21.1	0.267396	3.51305e-17	4.22621e-16
FBN1	15q21.1	0.267369	3.54015e-17	4.25625e-16
HYAL1	3p21.31	0.267295	3.61419e-17	4.34266e-16
AMPD3	11p15.4	0.267276	3.6333e-17	4.36301e-16
LRRK2	12q12	0.267254	3.65505e-17	4.3865e-16
MRAS	3q22.3	0.267126	3.78862e-17	4.54407e-16
ROR1	1p31.3	0.267105	3.81078e-17	4.56791e-16
RBMS3	3p24.1	0.267071	3.84662e-17	4.60811e-16
NOTCH1	9q34.3	0.267007	3.91656e-17	4.6891e-16
PDE1A	2q32.1	0.266998	3.92648e-17	4.69816e-16
HTR2B	2q37.1	0.266966	3.96143e-17	4.73716e-16
FNDC1	6q25.3	0.266894	4.04226e-17	4.82938e-16
SOBP	6q21	0.266893	4.04338e-17	4.82938e-16
SP110	2q37.1	0.266778	4.17508e-17	4.9837e-16
FOXN2	2p16.3	0.266765	4.18939e-17	4.99781e-16
FMO2	1q24.3	0.266626	4.35493e-17	5.1922e-16
ABHD10	3q13.2	-0.266563	4.43241e-17	5.28143e-16
WSCD2	12q23.3	0.266538	4.46295e-17	5.31465e-16
NINJ2	12p13.33	0.266515	4.49159e-17	5.34558e-16
OLFML2B	1q23.3	0.266502	4.50852e-17	5.36254e-16
POLI	18q21.2	-0.266436	4.59183e-17	5.45839e-16
MCTP2	15q26.2	0.266383	4.66017e-17	5.53634e-16
TKTL1	Xq28	0.266316	4.74834e-17	5.63774e-16
RRAD	16q22.1	0.266279	4.79729e-17	5.69248e-16
GJA4	1p34.3	0.266117	5.01883e-17	5.95183e-16
DPF3	14q24.2	0.266103	5.03789e-17	5.97089e-16
PPM1F	22q11.22	0.266025	5.1481e-17	6.09791e-16
PMCH	12q23.2	0.26594	5.27075e-17	6.23949e-16
CHST12	7p22.3	0.265924	5.29511e-17	6.26462e-16
ITIH5	10p14	0.265887	5.34967e-17	6.32544e-16
IL27	16p12.1-p11.2	0.265763	5.53635e-17	6.5423e-16
RBMS2	12q13.3	0.26575	5.55656e-17	6.56231e-16
SUB1	5p13.3	-0.265698	5.63821e-17	6.65482e-16
CSTA	3q21.1	0.265634	5.73903e-17	6.76983e-16
SLIT2	4p15.31	0.265483	5.98427e-17	7.05496e-16
NR1H3	11p11.2	0.265412	6.10382e-17	7.19166e-16
TNFSF4	1q25.1	0.265278	6.33418e-17	7.45868e-16
CXCR2	2q35	0.265214	6.44648e-17	7.58646e-16
TPST1	7q11.21	0.265057	6.73311e-17	7.91912e-16
GMIP	19p13.11	0.265012	6.81752e-17	8.01369e-16
AFAP1L1	5q32	0.264973	6.89177e-17	8.09621e-16
FOXN3	14q31.3-q32.11	0.264932	6.97131e-17	8.18484e-16
FAM13C	10q21.1	0.264837	7.1552e-17	8.39583e-16
STAG3	7q22.1	0.264811	7.20748e-17	8.45222e-16
IRGM	5q33.1	0.264613	7.614e-17	8.92371e-16
LHX6	9q33.2	0.264506	7.84211e-17	9.18568e-16
VCAN	5q14.2-q14.3	0.264472	7.91573e-17	9.26649e-16
MCEMP1	19p13.2	0.264454	7.95466e-17	9.30663e-16
CCDC88A	2p16.1	0.264387	8.10287e-17	9.47449e-16
PM20D1	1q32.1	0.264323	8.24822e-17	9.63881e-16
CEBPE	14q11.2	0.26426	8.39168e-17	9.80074e-16
FDCSP	4q13.3	0.263969	9.09254e-17	1.06131e-15
FIBIN	11p14.2	0.263931	9.18838e-17	1.07187e-15
CRYBB1	22q12.1	0.263873	9.33646e-17	1.08851e-15
HLA-C	6p21.33	0.263771	9.60206e-17	1.11882e-15
PLA2G12A	4q25	-0.263558	1.01829e-16	1.18581e-15
SLC17A9	20q13.33	0.263522	1.0283e-16	1.19677e-15
SMAP2	1p34.2	0.263247	1.109e-16	1.28995e-15
BCAT1	12p12.1	0.263162	1.13545e-16	1.31995e-15
NFKBIA	14q13.2	0.263049	1.17106e-16	1.36055e-15
CDC42SE2	5q31.1	0.262806	1.25175e-16	1.45346e-15
EREG	4q13.3	0.262734	1.27663e-16	1.48149e-15
ITGA1	5q11.2	0.262681	1.29528e-16	1.50225e-15
ISL2	15q24.3	0.262644	1.30853e-16	1.51675e-15
MME	3q25.2	0.262601	1.32411e-16	1.53391e-15
NFATC2	20q13.2	0.262581	1.33144e-16	1.54151e-15
GRIN3A	9q31.1	0.26226	1.45362e-16	1.682e-15
CGAS	6q13	0.262255	1.45557e-16	1.68328e-15
STAC	3p22.3-p22.2	0.26221	1.47364e-16	1.70319e-15
CHN1	2q31.1	0.262139	1.50275e-16	1.73584e-15
C12ORF29	12q21.32	-0.262095	1.52096e-16	1.75585e-15
TRAM2	6p12.2	0.262042	1.54303e-16	1.78031e-15
FAM167B	1p35.2	0.261978	1.57036e-16	1.81079e-15
EFHD2	1p36.21	0.261975	1.57126e-16	1.81079e-15
IL26	12q15	0.261921	1.59473e-16	1.83678e-15
CUBN	10p13	0.261912	1.59893e-16	1.84056e-15
DOC2B	17p13.3	0.261808	1.64474e-16	1.89221e-15
ITGAE	17p13.2	0.261713	1.68791e-16	1.94076e-15
SLC8A3	14q24.2	0.261685	1.70115e-16	1.95486e-15
DKK1	10q21.1	0.261682	1.70215e-16	1.95489e-15
DBH	9q34.2	0.261662	1.71168e-16	1.9647e-15
P2RY12	3q25.1	0.261477	1.80025e-16	2.06518e-15
GJD3	17q21.2	0.261457	1.81014e-16	2.07534e-15
C19ORF12	19q12	0.261328	1.87461e-16	2.14802e-15
CSK	15q24.1	0.261227	1.92706e-16	2.20686e-15
CMAHP	6p22.3	0.261104	1.99269e-16	2.28071e-15
RTL3	Xq21.1	0.261097	1.99644e-16	2.2837e-15
CALHM2	10q24.33	0.261035	2.03075e-16	2.32162e-15
DMRT3	9p24.3	0.260928	2.09019e-16	2.38821e-15
C20ORF141	20p13	0.260736	2.20269e-16	2.51531e-15
FGF18	5q35.1	0.260706	2.22055e-16	2.53426e-15
PIWIL4	11q21	0.26058	2.29758e-16	2.62068e-15
GDF10	10q11.22	0.260553	2.31479e-16	2.63881e-15
OPTN	10p13	0.26045	2.38055e-16	2.71223e-15
SLC43A2	17p13.3	0.260424	2.39741e-16	2.72988e-15
PTPN6	12p13.31	0.260409	2.40698e-16	2.73923e-15
GTF2IP1	7q11.23	-0.260361	2.43822e-16	2.7732e-15
ARHGAP22	10q11.22-q11.23	0.260354	2.44312e-16	2.7772e-15
DLG3	Xq13.1	-0.260341	2.45191e-16	2.78561e-15
DOK5	20q13.2	0.260339	2.45338e-16	2.78569e-15
TUBB6	18p11.21	0.260275	2.49575e-16	2.8322e-15
MIXL1	1q42.12	0.260144	2.58665e-16	2.93368e-15
LPAR6	13q14.2	0.259995	2.69312e-16	3.05271e-15
BACE2	21q22.2-q22.3	0.25993	2.74092e-16	3.10514e-15
NRBF2	10q21.3	0.259914	2.75269e-16	3.11671e-15
MYEF2	15q21.1	-0.259818	2.82539e-16	3.19722e-15
RGS19	20q13.33	0.259768	2.86389e-16	3.23895e-15
CCDC102B	18q22.1	0.259747	2.88013e-16	3.25547e-15
ZNFX1	20q13.13	0.259439	3.13013e-16	3.53606e-15
DNAJB5	9p13.3	0.259435	3.13318e-16	3.5375e-15
B3GNT3	19p13.11	0.259375	3.18419e-16	3.59307e-15
TSKS	19q13.33	0.259372	3.18679e-16	3.59398e-15
SLFN12	17q12	0.259311	3.23976e-16	3.65167e-15
EFCAB7	1p31.3	-0.259191	3.3468e-16	3.77019e-15
TNFRSF13C	22q13.2	0.259036	3.48987e-16	3.92915e-15
MYD88	3p22.2	0.258896	3.62376e-16	4.0776e-15
TLR6	4p14	0.258789	3.72967e-16	4.19442e-15
LOX	5q23.1	0.25869	3.83088e-16	4.30581e-15
NECTIN3	3q13.13	0.258642	3.88115e-16	4.35987e-15
DDR2	1q23.3	0.258589	3.93608e-16	4.41909e-15
PHLDB1	11q23.3	0.258529	4.00042e-16	4.48882e-15
WNT7A	3p25.1	0.258236	4.32866e-16	4.85441e-15
CMTM3	16q22.1	0.258091	4.5006e-16	5.0444e-15
HTR7	10q23.31	0.258021	4.58571e-16	5.13692e-15
EMCN	4q24	0.257925	4.70642e-16	5.26918e-15
SCN11A	3p22.2	0.257878	4.76561e-16	5.33247e-15
MYBPC2	19q13.33	0.257816	4.84581e-16	5.41919e-15
CSF3R	1p34.3	0.257809	4.85455e-16	5.42593e-15
ADARB1	21q22.3	0.257799	4.86812e-16	5.43806e-15
IFITM3	11p15.5	0.257768	4.90884e-16	5.48049e-15
PCDHGA12	5q31.3	0.257756	4.92389e-16	5.49423e-15
RNF130	5q35.3	0.257712	4.98267e-16	5.55672e-15
ZNF215	11p15.4	0.25769	5.0115e-16	5.58576e-15
CDK6	7q21.2	0.257636	5.08565e-16	5.66525e-15
PYGM	11q13.1	0.257485	5.29555e-16	5.89579e-15
DYNC2LI1	2p21	-0.257429	5.37548e-16	5.98145e-15
RCAN1	21q22.12	0.257356	5.48216e-16	6.09677e-15
KIR2DL1	19q13.42	0.257254	5.63263e-16	6.26063e-15
SIGLEC6	19q13.41	0.257223	5.67946e-16	6.30918e-15
ECM2	9q22.31	0.257216	5.69036e-16	6.31778e-15
TRANK1	3p22.2	0.257209	5.70128e-16	6.32639e-15
LINC00158	21q21.2	0.257194	5.72466e-16	6.34882e-15
MICAL3	22q11.21	0.257184	5.73911e-16	6.36132e-15
JAM3	11q25	0.257178	5.74845e-16	6.36815e-15
SH3BP1	22q13.1	0.257159	5.77886e-16	6.3983e-15
PREX2	8q13.2	0.257029	5.98213e-16	6.61969e-15
ZNF433	19p13.2	-0.256937	6.13128e-16	6.781e-15
PADI2	1p36.13	0.256931	6.14196e-16	6.78906e-15
CALCRL	2q32.1	0.256803	6.35611e-16	7.02188e-15
RAB3A	19p13.11	-0.256787	6.38269e-16	7.04737e-15
PRDM16-DT	1p36.32	0.256766	6.41935e-16	7.08393e-15
C1ORF56	1q21.3	-0.256732	6.47758e-16	7.14425e-15
CLEC2D	12p13.31	0.256556	6.78882e-16	7.4834e-15
COL18A1	21q22.3	0.256512	6.86806e-16	7.56658e-15
COX6B2	19q13.42	0.256452	6.98018e-16	7.68587e-15
MTA3	2p21	-0.256418	7.0438e-16	7.75167e-15
YPEL4	11q12.1	0.256382	7.11037e-16	7.82063e-15
FBXO32	8q24.13	0.256243	7.37962e-16	8.11231e-15
CYP2S1	19q13.2	0.256202	7.4616e-16	8.19793e-15
HOXC8	12q13.13	0.256035	7.7994e-16	8.56436e-15
IL5RA	3p26.2	0.255992	7.88999e-16	8.65909e-15
GP5	3q29	0.255923	8.03562e-16	8.81408e-15
ANGPT1	8q23.1	0.25569	8.54924e-16	9.37232e-15
B3GNT7	2q37.1	0.255642	8.66075e-16	9.48938e-15
GRID1	10q23.1-q23.2	0.255334	9.39895e-16	1.02926e-14
ESAM	11q24.2	0.25533	9.40938e-16	1.02984e-14
CNN1	19p13.2	0.255126	9.93138e-16	1.08637e-14
CPM	12q15	0.255097	1.00074e-15	1.09409e-14
FAM43A	3q29	0.255055	1.01214e-15	1.10595e-14
COL19A1	6q13	0.254952	1.03992e-15	1.13569e-14
ROBO1	3p12.3	0.254904	1.05339e-15	1.14954e-14
CDKN2AIPNL	5q31.1	-0.254903	1.05376e-15	1.14954e-14
EHD2	19q13.33	0.254861	1.06545e-15	1.16167e-14
NAGA	22q13.2	0.25478	1.08849e-15	1.18614e-14
VASN	16p13.3	0.254749	1.09757e-15	1.19539e-14
WDSUB1	2q24.2	-0.254735	1.10148e-15	1.19899e-14
WWTR1	3q25.1	0.254719	1.10628e-15	1.20356e-14
MYL9	20q11.23	0.254684	1.11657e-15	1.2141e-14
FNDC4	2p23.3	0.25468	1.11762e-15	1.21458e-14
OTULINL	5p15.2	0.254613	1.13777e-15	1.23581e-14
B3GNT5	3q27.1	0.254484	1.17717e-15	1.27791e-14
FMNL2	2q23.3	0.254387	1.2077e-15	1.31034e-14
IQCH	15q23	-0.254385	1.2084e-15	1.31039e-14
EBF3	10q26.3	0.254235	1.2573e-15	1.36267e-14
IL1RAP	3q28	0.254108	1.30038e-15	1.4086e-14
SPIC	12q23.2	0.25404	1.32363e-15	1.43301e-14
CYP26B1	2p13.2	0.253946	1.35699e-15	1.46834e-14
S100B	21q22.3	0.253607	1.48411e-15	1.60502e-14
GREM2	1q43	0.253603	1.48553e-15	1.60569e-14
SKAP2	7p15.2	0.25353	1.51449e-15	1.6361e-14
TMEM161B	5q14.3	-0.253514	1.52053e-15	1.64175e-14
PI16	6p21.2	0.253354	1.5863e-15	1.71183e-14
HTR2A	13q14.2	0.253328	1.59701e-15	1.72247e-14
CARD17	11q22.3	0.253315	1.60239e-15	1.72733e-14
MZB1	5q31.2	0.253236	1.63634e-15	1.76299e-14
OAS2	12q24.13	0.253089	1.70083e-15	1.83148e-14
DKK2	4q25	0.25301	1.73653e-15	1.86892e-14
CCM2L	20q11.21	0.252974	1.75272e-15	1.88533e-14
OR52N4	11p15.4	0.252951	1.76338e-15	1.89577e-14
LAYN	11q23.1	0.252892	1.79104e-15	1.92448e-14
SIRPD	20p13	0.252814	1.82785e-15	1.96298e-14
FAM20C	7p22.3	0.25274	1.86381e-15	2.00053e-14
PKD2	4q22.1	0.252713	1.87716e-15	2.01378e-14
MMD	17q22	0.252688	1.88931e-15	2.02572e-14
SP100	2q37.1	0.252597	1.93539e-15	2.07369e-14
CAMK2D	4q26	0.252595	1.93612e-15	2.07369e-14
ANKDD1A	15q22.31	0.252438	2.01777e-15	2.15999e-14
MRC2	17q23.2	0.252422	2.02601e-15	2.16765e-14
LRIG3	12q14.1	0.252387	2.04492e-15	2.18671e-14
EOGT	3p14.1	0.252269	2.10916e-15	2.2542e-14
CATSPER1	11q13.1	0.252238	2.12624e-15	2.27124e-14
TDRD10	1q21.3	0.252234	2.12826e-15	2.27219e-14
CAVIN2	2q32.3	0.25217	2.16439e-15	2.30953e-14
RNF2	1q25.3	-0.252165	2.16731e-15	2.31141e-14
FN1	2q35	0.252153	2.17396e-15	2.31727e-14
LSAMP	3q13.31	0.25203	2.24486e-15	2.39157e-14
SLC16A3	17q25.3	0.252011	2.25613e-15	2.40229e-14
ZNF627	19p13.2	-0.251924	2.30817e-15	2.45641e-14
CNTNAP4	16q23.1	0.251896	2.32521e-15	2.47323e-14
IL34	16q22.1	0.251713	2.43884e-15	2.59271e-14
DUSP2	2q11.2	0.251617	2.50129e-15	2.65768e-14
LINC02693	17p11.2	0.251571	2.53122e-15	2.68806e-14
MUC12	7q22.1	0.251373	2.66535e-15	2.82901e-14
IER3IP1	18q21.1	-0.251273	2.73624e-15	2.9027e-14
BTNL8	5q35.3	0.251244	2.75652e-15	2.92267e-14
CDH7	18q22.1	-0.251234	2.76412e-15	2.92918e-14
DCTN4	5q33.1	-0.251013	2.92815e-15	3.10136e-14
ABTB2	11p13	0.250987	2.94786e-15	3.12058e-14
NEK6	9q33.3	0.250955	2.97234e-15	3.14483e-14
EFEMP1	2p16.1	0.250943	2.98169e-15	3.15306e-14
SLC26A9	1q32.1	0.250938	2.98535e-15	3.15526e-14
MFAP5	12p13.31	0.250871	3.03788e-15	3.20909e-14
GPR68	14q32.11	0.250847	3.05714e-15	3.22774e-14
SLC1A7	1p32.3	0.250667	3.20418e-15	3.38119e-14
SEC14L1	17q25.2-q25.3	0.250637	3.2289e-15	3.40549e-14
IFT81	12q24.11	-0.250473	3.36958e-15	3.55199e-14
ADRB1	10q25.3	0.25038	3.45195e-15	3.6369e-14
PSMB8	6p21.32	0.25036	3.47002e-15	3.65402e-14
DLC1	8p22	0.250327	3.4994e-15	3.68302e-14
TIMP2	17q25.3	0.250313	3.51229e-15	3.69464e-14
CLDN5	22q11.21	0.250275	3.54755e-15	3.72977e-14
DNAH8	6p21.2	0.250264	3.55796e-15	3.73875e-14
DGKA	12q13.2	0.250251	3.56932e-15	3.74677e-14
LTK	15q15.1	0.250251	3.56933e-15	3.74677e-14
SLC12A4	16q22.1	0.250216	3.60234e-15	3.77943e-14
ZNF267	16p11.2	0.250083	3.72877e-15	3.91003e-14
TINAGL1	1p35.2	0.250069	3.74252e-15	3.92239e-14
HOXA10	7p15.2	0.250006	3.8043e-15	3.98506e-14
LILRP2	19q13.42	0.249983	3.82629e-15	4.00599e-14
GBP7	1p22.2	0.249981	3.82903e-15	4.00677e-14
LZTS1	8p21.3	0.249932	3.87764e-15	4.05551e-14
PCDH17	13q21.1	0.249813	3.99942e-15	4.1807e-14
PEAK1	15q24.3	0.249713	4.10376e-15	4.28752e-14
GABRE	Xq28	0.249649	4.17302e-15	4.35762e-14
PPARD	6p21.31	0.24962	4.20367e-15	4.38734e-14
FIGNL2	12q13.13	0.249612	4.21322e-15	4.39501e-14
DACH1	13q21.33	-0.249499	4.33742e-15	4.52221e-14
PPP4R1L	20q13.32	0.24949	4.34777e-15	4.53065e-14
GLCE	15q23	-0.249445	4.39941e-15	4.58207e-14
CAMK2A	5q32	0.249396	4.45485e-15	4.6374e-14
IHO1	3p21.31	0.249385	4.46804e-15	4.64871e-14
PLXNA4	7q32.3	0.249327	4.53572e-15	4.71668e-14
MYO7A	11q13.5	0.2493	4.5667e-15	4.74642e-14
LOC728989	1q21.1	0.24929	4.57917e-15	4.75692e-14
OSMR	5p13.1	0.24921	4.67475e-15	4.85369e-14
INTS6L	Xq26.3	0.249161	4.73399e-15	4.91265e-14
ACADL	2q34	0.249151	4.74642e-15	4.92299e-14
SFRP2	4q31.3	0.249097	4.81326e-15	4.98973e-14
TRPM6	9q21.13	0.249071	4.84517e-15	5.02022e-14
PADI4	1p36.13	0.249058	4.86105e-15	5.03407e-14
NID2	14q22.1	0.249036	4.88917e-15	5.06057e-14
MATN2	8q22.1-q22.2	0.24902	4.90976e-15	5.07926e-14
RASIP1	19q13.33	0.248929	5.02619e-15	5.19702e-14
TAGLN	11q23.3	0.248886	5.08203e-15	5.25159e-14
PSME2	14q12	0.248885	5.08421e-15	5.25159e-14
DNAJC19	3q26.33	-0.248838	5.14637e-15	5.31305e-14
CCN3	8q24.12	0.248828	5.15865e-15	5.32299e-14
IL17RB	3p21.1	-0.248821	5.16828e-15	5.33017e-14
ADAM12	10q26.2	0.248812	5.18049e-15	5.34001e-14
EIF5A2	3q26.2	0.24881	5.18319e-15	5.34004e-14
PSAT1	9q21.2	0.248781	5.22138e-15	5.37663e-14
MFHAS1	8p23.1	0.248735	5.28429e-15	5.4386e-14
ZDHHC19	3q29	0.24873	5.29141e-15	5.44313e-14
CARD8	19q13.33	0.248699	5.33416e-15	5.48429e-14
SPHK1	17q25.1	0.248678	5.36321e-15	5.50885e-14
FOSL1	11q13.1	0.248677	5.36355e-15	5.50885e-14
VSIG10	12q24.23	-0.248663	5.38265e-15	5.52317e-14
MFRP	11q23.3	0.248663	5.38301e-15	5.52317e-14
MRTFA	22q13.1-q13.2	0.248606	5.46331e-15	5.60269e-14
ART3	4q21.1	0.24859	5.48556e-15	5.62263e-14
HCAR2	12q24.31	0.248572	5.51123e-15	5.64605e-14
RETREG1	5p15.1	-0.248534	5.56477e-15	5.69798e-14
DHX40	17q23.1	-0.248502	5.61144e-15	5.74283e-14
ITGBL1	13q33.1	0.248384	5.78519e-15	5.91763e-14
KCNMB1	5q35.1	0.248371	5.80342e-15	5.93324e-14
MCF2L2	3q27.1	0.248345	5.84224e-15	5.96988e-14
RTP4	3q27.3	0.24833	5.86569e-15	5.99078e-14
TENM4	11q14.1	0.24826	5.97171e-15	6.09595e-14
DIO3OS	14q32.31	0.248145	6.15175e-15	6.27655e-14
GLT8D2	12q23.3	0.248119	6.19329e-15	6.31571e-14
TESC	12q24.22	0.248068	6.2739e-15	6.39465e-14
BMP1	8p21.3	0.247945	6.47574e-15	6.59702e-14
CMPK2	2p25.2	0.247931	6.49906e-15	6.6174e-14
SAMD9	7q21.2	0.247897	6.55609e-15	6.67208e-14
OVOL2	20p11.23	-0.247844	6.6468e-15	6.76096e-14
GSTO2	10q25.1	-0.247795	6.73004e-15	6.84216e-14
RASGRF1	15q25.1	0.247594	7.08691e-15	7.20131e-14
CRP	1q23.2	0.247583	7.10616e-15	7.2172e-14
LCNL1	9q34.3	0.24758	7.11187e-15	7.21934e-14
ABCA8	17q24.2	0.247518	7.22571e-15	7.33118e-14
FES	15q26.1	0.247502	7.25609e-15	7.35828e-14
ARAP3	5q31.3	0.247451	7.35135e-15	7.4511e-14
PARP8	5q11.1	0.247342	7.55929e-15	7.65798e-14
LINC00924	15q26.2	0.247267	7.70618e-15	7.80285e-14
TMEM51	1p36.21	0.247119	8.00379e-15	8.10009e-14
CTRL	16q22.1	0.247101	8.04217e-15	8.13482e-14
UPB1	22q11.23	0.246832	8.61516e-15	8.71001e-14
PLXND1	3q22.1	0.246802	8.68129e-15	8.77245e-14
MYH11	16p13.11	0.246757	8.78212e-15	8.86986e-14
SLC10A3	Xq28	0.246663	8.9955e-15	9.08079e-14
PKHD1L1	8q23.1-q23.2	0.246649	9.02672e-15	9.10771e-14
RAP1A	1p13.2	0.246633	9.06421e-15	9.14092e-14
MARVELD2	5q13.2	-0.246565	9.22209e-15	9.29546e-14
KIAA1614	1q25.3	0.246533	9.29744e-15	9.36669e-14
CXCL3	4q13.3	0.246521	9.32656e-15	9.39131e-14
TSG101	11p15.1	-0.246484	9.41605e-15	9.47665e-14
JPH2	20q13.12	0.246454	9.48916e-15	9.54543e-14
MINDY1	1q21.3	-0.246439	9.5247e-15	9.57636e-14
STRBP	9q33.1-q33.3	-0.246418	9.57605e-15	9.62316e-14
DMD	Xp21.2-p21.1	0.246411	9.5928e-15	9.63516e-14
LY75	2q24.2	0.24635	9.74344e-15	9.78e-14
SLC25A36	3q23	-0.246349	9.74677e-15	9.78e-14
ISLR	15q24.1	0.246299	9.87143e-15	9.8953e-14
ARHGAP20	11q22.3-q23.1	0.246299	9.87157e-15	9.8953e-14
FEZ1	11q24.2	0.246208	1.01019e-14	1.01211e-13
SLC22A11	11q13.1	0.246173	1.01931e-14	1.02074e-13
[truncated: 18,019 more rows]
