# Supplementary material for: Weakly migratory metastatic breast cancer cells activate fibroblasts via microvesicle-Tg2 to facilitate dissemination and metastasis
Source: eLife. 2022 Dec 7;11:e74433. doi: 10.7554/eLife.74433 (PMC9767463; doi:10.7554/eLife.74433)
Supplement: Supplementary file 1. [file elife-74433-supp1.xlsx]

## Sheet: Sheet1
Supplementary Table 1. Primer sequences used for quantitative real-time PCR.
Gene	Forward Primer (5’-3’)	Reverse Primer (5’-3’)
Acta2	TGTAGCCCTGGCCTAGCAAC	TGCCATCCATGCCTGGGAATA
Fap	GTGGAAGACAGACTTGCTTCTTTT	CAGGTTTGTAAACTCTTGAGGGACG
Pdgfra	AAACCCGGTGGGTGTCCTAA	CGGGATCCATCCAAGCCATCA
Pdgfrb	CCCTCGAGGAAAGCCCTTGG	GACCTTCCCGAGGCAGAGTT
Gapdh	CTGGTAAAGTGGATATTGTTGCCAT	TGGAATCATATTGGAACATGTAAACC
Col1A1	CTGGACAGCCTGGACTTC	TTCATCATAGCCATAGGACATC
Fn	CAGAAATGACCATTGAAGGT	ATGAGTCCTGACACAATCAC
Col4A1	GAAGGGTAGCATCGGGGGAC	GTGGCCCTATTCCTGGGACC
Tenascin C	ACCATGCTGAGATAGATGTTCCAAA	CTTGACAGCAGAAACACCAATCC
Periostin	TGCTGCCCTGGCTATATGAG	GTAGTGGCTCCCACAATGCC
